# Supplementary material
Source: PubMed Central journal article supplement (PMC3395112)
Supplement: emmm0003-0153-SD1.pdf [file emmm0003-0153-SD1.pdf]

**Supplementary Table 1: Distribution of luminal tumors analysed by aCGH according to histoclinical parameters**

| Parameters            | n   | Luminal A | Luminal B | p-value            | odds ratio            |
|-----------------------|-----|-----------|-----------|--------------------|-----------------------|
| Age                   | 100 | 54(30-82) | 61(24-85) | 0.86               |                       |
| Histological type*    | 87  |           |           | 0.58               |                       |
| Other                 |     | 11(19%)   | 6(20%)    |                    |                       |
| IDC                   |     | 41(71%)   | 22(76%)   |                    |                       |
| ILC                   |     | 6(10%)    | 1(3%)     |                    |                       |
| Tumor size            | 99  |           |           | 0.48               |                       |
| pT1                   |     | 16(27%)   | 7(18%)    |                    |                       |
| pT2                   |     | 31(53%)   | 22(55%)   |                    |                       |
| pT3                   |     | 12(20%)   | 11(28%)   |                    |                       |
| Lymph node metastasis | 100 |           |           | 0.51               | 1,39<br>(0.54-3.75)   |
| negative              |     | 20(34%)   | 11(27%)   |                    |                       |
| positive              |     | 39(66%)   | 30(73%)   |                    |                       |
| SBR Grade             | 96  |           |           | <b>1.00E-05</b>    |                       |
| I                     |     | 21(36%)   | 0(0%)     |                    |                       |
| II                    |     | 30(52%)   | 15(39%)   |                    |                       |
| III                   |     | 7(12%)    | 23(61%)   |                    |                       |
| ERBB2                 | 81  |           |           | 0.27               | 3,93<br>(0.2-240.04)  |
| negative              |     | 52(98%)   | 26(93%)   |                    |                       |
| positive              |     | 1(2%)     | 2(7%)     |                    |                       |
| ER                    | 100 |           |           | 1                  | 1,41<br>(0.19-16.35)  |
| negative              |     | 4(7%)     | 2(5%)     |                    |                       |
| positive              |     | 55(93%)   | 39(95%)   |                    |                       |
| PR                    | 100 |           |           | 0.24               | 0,56<br>(0.19-1.58)   |
| negative              |     | 11(19%)   | 12(29%)   |                    |                       |
| positive              |     | 48(81%)   | 29(71%)   |                    |                       |
| p53                   | 72  |           |           | 1                  | 0,97<br>(0.15-4.69)   |
| negative              |     | 44(85%)   | 17(85%)   |                    |                       |
| positive              |     | 8(15%)    | 3(15%)    |                    |                       |
| Ki67                  | 69  |           |           | <b>0.000122259</b> | 20,72<br>(2.85-921.5) |
| negative              |     | 33(92%)   | 9(56%)    |                    |                       |
| positive              |     | 3(8%)     | 7(44%)    |                    |                       |
| MFS (5y)              | 95  | 57 (91%)  | 38 (60%)  | <b>0.000487</b>    |                       |
| OSS (5y)              | 76  | 53 (91%)  | 23 (57%)  | <b>5.92E-06</b>    |                       |

IDC, Invasive Ductal Carcinoma ; ILC, Invasive Lobular Carcinoma

## Supplementary Table 2: Results of aCGH supervised analysis between 59 Luminal A and 41 Luminal B breast tumors.

\* Genomic segments corresponding to minimal chromosomal regions of equal copy number (see supplementary methods section)  
 Genomic segments are classified according to supervised analysis results, with the mostly amplified segment in luminal B tumors on the top.  
 ‡ For each genomic segments, we mentioned "chromosomal start location-chromosomal end location" as defined on hg17 human genome mapping  
 § Genes mapped in the defined genomic segments  
 † Association of segment amplification with Luminal B Vs Luminal A phenotype was evaluated by fisher exact test

| Segment Names*    | Chromo some Name | * Amplified chromosomal Region (bp) | Region Length (bp) | Genes §                                          | Amplifications.o dds ratio | Amplificatons.p value † | Amplifications.fre quency.Luminal A tumors | Amplifications.freque ncy.Luminal B tumors |
|-------------------|------------------|-------------------------------------|--------------------|--------------------------------------------------|----------------------------|-------------------------|--------------------------------------------|--------------------------------------------|
| 8q#115064_115075  | 8                | 101266092-101361665                 | 95574              | SPAG1, RNF19                                     | 0.159775784                | 0.002113563             | 0.07                                       | 0.32                                       |
| 20q#216892_216905 | 20               | 51618614-51876925                   | 258312             | ZNF217                                           | 0                          | 0.003771972             | 0.00                                       | 0.15                                       |
| 8p#110487_110488  | 8                | 37347478-37371028                   | 23551              |                                                  | 0.202896431                | 0.003865205             | 0.08                                       | 0.32                                       |
| 8p#110489_110490  | 8                | 37400895-37428562                   | 27668              |                                                  | 0.202896431                | 0.003865205             | 0.08                                       | 0.32                                       |
| 8p#110493_110494  | 8                | 37484171-37507866                   | 23696              |                                                  | 0.202896431                | 0.003865205             | 0.08                                       | 0.32                                       |
| 8p#110495_110503  | 8                | 37538466-37676801                   | 138336             | ZNF703                                           | 0.202896431                | 0.003865205             | 0.08                                       | 0.32                                       |
| 8q#117013_117033  | 8                | 127316683-127707850                 | 391168             | BC038572, FAM84B                                 | 0.179013656                | 0.004441223             | 0.07                                       | 0.29                                       |
| 8q#117034_117050  | 8                | 127737351-128108257                 | 370907             |                                                  | 0.179013656                | 0.004441223             | 0.07                                       | 0.29                                       |
| 8q#115314_115332  | 8                | 104114999-104301218                 | 186220             | ATP6V1C1, AK001351, BAALC                        | 0.179013656                | 0.004441223             | 0.07                                       | 0.29                                       |
| 8q#114802_114845  | 8                | 99023286-99348302                   | 325017             | ATN2, RPL30, C8orf47, HRSP12, POP1, D31765, NPAL | 0.179013656                | 0.004441223             | 0.07                                       | 0.29                                       |
| 8q#114861_114872  | 8                | 99532186-99627381                   | 95196              | STK3                                             | 0.179013656                | 0.004441223             | 0.07                                       | 0.29                                       |
| 8q#114922_115063  | 8                | 100082337-101259311                 | 1176975            | VPS13B, COX6C, RGS22, FBXO43, POLR2K, SPAG1      | 0.179013656                | 0.004441223             | 0.07                                       | 0.29                                       |
| 8q#115076_115109  | 8                | 101369605-101780026                 | 410422             | RNF19, BC050396, ANKRD46, MGC39715               | 0.179013656                | 0.004441223             | 0.07                                       | 0.29                                       |
| 8q#115137_115171  | 8                | 102206991-102641029                 | 434039             | G65598, BC035156, ZNF706, AF315951, GRHL2        | 0.179013656                | 0.004441223             | 0.07                                       | 0.29                                       |
| 8q#115172_115208  | 8                | 102651707-102937387                 | 285681             | GRHL2, NCALD                                     | 0.179013656                | 0.004441223             | 0.07                                       | 0.29                                       |
| 8q#115308_115313  | 8                | 104033015-104103365                 | 70351              | ATP6V1C1                                         | 0.179013656                | 0.004441223             | 0.07                                       | 0.29                                       |
| 8q#115333_115352  | 8                | 104310836-104475441                 | 164606             | BAALC, AK129733, FZD6, CTHRC1                    | 0.179013656                | 0.004441223             | 0.07                                       | 0.29                                       |
| 8q#117090_117102  | 8                | 128838501-128971933                 | 133433             | M34429, M34428                                   | 0.179013656                | 0.004441223             | 0.07                                       | 0.29                                       |
| 8q#117113_117128  | 8                | 129052196-129252382                 | 200187             | BC033263                                         | 0.179013656                | 0.004441223             | 0.07                                       | 0.29                                       |
| 8q#114873_114921  | 8                | 99635783-100064842                  | 429060             | STK3, AK131363, OSR2                             | 0.179013656                | 0.004441223             | 0.07                                       | 0.29                                       |
| 8q#117051_117064  | 8                | 128132928-128409924                 | 276997             |                                                  | 0.179013656                | 0.004441223             | 0.07                                       | 0.29                                       |
| 8q#117103_117112  | 8                | 128989029-129046591                 | 57563              | M34428, BC033263                                 | 0.179013656                | 0.004441223             | 0.07                                       | 0.29                                       |
| 8q#117065_117082  | 8                | 128427683-128797848                 | 370166             | BC042052                                         | 0.179013656                | 0.004441223             | 0.07                                       | 0.29                                       |
| 8p#110842_110843  | 8                | 41074444-41096183                   | 21740              |                                                  | 0.169174277                | 0.006523086             | 0.05                                       | 0.24                                       |
| 8p#110844_110845  | 8                | 41131457-41160106                   | 28650              |                                                  | 0.169174277                | 0.006523086             | 0.05                                       | 0.24                                       |
| 8q#118079_118092  | 8                | 142377477-142475211                 | 97735              | BC029463, AK026750, GPR20                        | 0.12735588                 | 0.006697841             | 0.03                                       | 0.22                                       |
| 8q#118094_118117  | 8                | 142492050-142688797                 | 196748             | PTP4A3, FLJ43860                                 | 0.12735588                 | 0.006697841             | 0.03                                       | 0.22                                       |
| 8q#118118_118132  | 8                | 142696391-142921838                 | 225448             |                                                  | 0.12735588                 | 0.006697841             | 0.03                                       | 0.22                                       |
| 8q#118492_118507  | 8                | 145718225-145830148                 | 111924             | LRRRC14, LRRRC24, KIAA1688                       | 0.085635985                | 0.007641457             | 0.02                                       | 0.17                                       |
| 8q#118508_118509  | 8                | 145836115-145843808                 | 7694               |                                                  | 0.085635985                | 0.007641457             | 0.02                                       | 0.17                                       |
| 8q#118535_118541  | 8                | 146024157-146071002                 | 46846              | ZNF7, COMMD5, Z28407, BC107579                   | 0.085635985                | 0.007641457             | 0.02                                       | 0.17                                       |
| 8q#118510_118527  | 8                | 145855624-145985998                 | 130375             | AK130913, ZNF34, RPL8                            | 0.085635985                | 0.007641457             | 0.02                                       | 0.17                                       |
| 8q#118454_118460  | 8                | 145534919-145568219                 | 33301              | FBXL6, GPR172A                                   | 0.085635985                | 0.007641457             | 0.02                                       | 0.17                                       |
| 8q#118475_118491  | 8                | 145641165-145713062                 | 71898              | K094514, CYHR1, KIFC2, AK090471, PPP1R16A, BC013 | 0.085635985                | 0.007641457             | 0.02                                       | 0.17                                       |
| 17q#199159_199168 | 17               | 63281223-63357149                   | 75927              | FALZ                                             | 0.085635985                | 0.007641457             | 0.02                                       | 0.17                                       |
| 8q#118377_118453  | 8                | 144918431-145533436                 | 615006             | SPATC1, OPLAH, BC023010, GPAA1, CYC1, SHARPIN,   | 0.085635985                | 0.007641457             | 0.02                                       | 0.17                                       |
| 8q#118529_118534  | 8                | 145993077-146018556                 | 25480              | AK130913, ZNF517, Z28407                         | 0.085635985                | 0.007641457             | 0.02                                       | 0.17                                       |
| 17q#199150_199158 | 17               | 63162505-63273149                   | 110645             | NOL11, FALZ                                      | 0.085635985                | 0.007641457             | 0.02                                       | 0.17                                       |
| 8q#118365_118376  | 8                | 144840048-144910167                 | 70120              | ZNF707, BC035363, MAPK15, FAM83H, AK124079       | 0.085635985                | 0.007641457             | 0.02                                       | 0.17                                       |
| 17q#199169_199170 | 17               | 63372480-63386411                   | 13932              | FALZ                                             | 0.085635985                | 0.007641457             | 0.02                                       | 0.17                                       |
| 8q#118152_118164  | 8                | 143177905-143309437                 | 131533             | BC008253, TSNARE1                                | 0.085635985                | 0.007641457             | 0.02                                       | 0.17                                       |
| 8q#116793_116821  | 8                | 124855553-125109803                 | 254251             | FAM91A1, C8ORFK23                                | 0.201743795                | 0.009126747             | 0.07                                       | 0.27                                       |

|                   |    |                     |         |                                              |             |             |      |      |
|-------------------|----|---------------------|---------|----------------------------------------------|-------------|-------------|------|------|
| 8q#116767_116785  | 8  | 124589960-124794223 | 204264  | FBX032, AB196636, ANXA13                     | 0.201743795 | 0.009126747 | 0.07 | 0.27 |
| 8q#116693_115895  | 8  | 108926406-112296204 | 3369799 | TMEM74, TRHR, NUDCD1, ENY2, AK095651, PKHD1L | 0.201743795 | 0.009126747 | 0.07 | 0.27 |
| 8q#116137_116145  | 8  | 116410618-116542099 | 131482  | TRPS1                                        | 0.201743795 | 0.009126747 | 0.07 | 0.27 |
| 8q#116969_117012  | 8  | 126589494-127274759 | 685266  | AK093407                                     | 0.201743795 | 0.009126747 | 0.07 | 0.27 |
| 8q#114787_114801  | 8  | 98873477-99014727   | 141251  | LAPTM4B, MATN2                               | 0.201743795 | 0.009126747 | 0.07 | 0.27 |
| 8q#114846_114860  | 8  | 99354333-99524544   | 170212  | NPAL2                                        | 0.201743795 | 0.009126747 | 0.07 | 0.27 |
| 8q#115110_115116  | 8  | 101784749-101813187 | 28439   | PABPC1                                       | 0.201743795 | 0.009126747 | 0.07 | 0.27 |
| 8q#115122_115128  | 8  | 101968666-102022397 | 53732   | AF074984, YWHAZ                              | 0.201743795 | 0.009126747 | 0.07 | 0.27 |
| 8q#115135_115136  | 8  | 102155549-102175145 | 19597   | AK124959                                     | 0.201743795 | 0.009126747 | 0.07 | 0.27 |
| 8q#115209_115246  | 8  | 102943705-103289369 | 345665  | NCALD, RRM2B                                 | 0.201743795 | 0.009126747 | 0.07 | 0.27 |
| 8q#115292_115307  | 8  | 103833419-103991919 | 158501  | FLJ45248, AZIN1, BC037349                    | 0.201743795 | 0.009126747 | 0.07 | 0.27 |
| 8q#115353_115372  | 8  | 104480609-104646562 | 165954  | SLC25A32, WDSOF1, AK126939                   | 0.201743795 | 0.009126747 | 0.07 | 0.27 |
| 8q#115381_115511  | 8  | 104738909-106258113 | 1519205 | AK126939, RIMS2, TM7SF4, DPYS, LRP12         | 0.201743795 | 0.009126747 | 0.07 | 0.27 |
| 8q#116786_116791  | 8  | 124801419-124840858 | 39440   | ANXA13                                       | 0.201743795 | 0.009126747 | 0.07 | 0.27 |
| 8q#117207_117210  | 8  | 130833296-130968099 | 34804   | MLZE                                         | 0.201743795 | 0.009126747 | 0.07 | 0.27 |
| 8q#115896_115898  | 8  | 112334894-112386137 | 51244   |                                              | 0.201743795 | 0.009126747 | 0.07 | 0.27 |
| 8q#117151_117206  | 8  | 129948567-130823912 | 875346  | CR593328, CCDC26                             | 0.201743795 | 0.009126747 | 0.07 | 0.27 |
| 8q#115930_115954  | 8  | 113334775-113554014 | 219240  | CSMD3                                        | 0.201743795 | 0.009126747 | 0.07 | 0.27 |
| 8q#115899_115929  | 8  | 112428669-113325815 | 897147  | CSMD3                                        | 0.201743795 | 0.009126747 | 0.07 | 0.27 |
| 8q#117129_117131  | 8  | 129302340-129381779 | 79440   |                                              | 0.201743795 | 0.009126747 | 0.07 | 0.27 |
| 8q#114043_114067  | 8  | 88907073-89193540   | 286488  | WDR21C, AL136588, MMP16                      | 0.201743795 | 0.009126747 | 0.07 | 0.27 |
| 8q#114036_114042  | 8  | 88712289-88871128   | 158840  |                                              | 0.201743795 | 0.009126747 | 0.07 | 0.27 |
| 11q#145751_145753 | 11 | 74405542-74446516   | 40975   |                                              | 0           | 0.00953814  | 0.00 | 0.12 |
| 11q#145754_145760 | 11 | 74461940-74522516   | 60577   |                                              | 0           | 0.00953814  | 0.00 | 0.12 |
| 20q#216906_216914 | 20 | 51903443-52008335   | 104893  | CR749643, BCAS1                              | 0           | 0.00953814  | 0.00 | 0.12 |
| 20q#216916_216919 | 20 | 52027394-52053944   | 26551   | BCAS1                                        | 0           | 0.00953814  | 0.00 | 0.12 |
| 8p#110545_110547  | 8  | 37957721-37983735   | 26015   |                                              | 0.227348395 | 0.012979219 | 0.08 | 0.29 |
| 8p#110504_110523  | 8  | 37682968-37823649   | 140682  | BC031939, SPFH2, PROSC, GPR124, BRF2         | 0.227348395 | 0.012979219 | 0.08 | 0.29 |
| 8p#110524_110531  | 8  | 37829886-37868676   | 38791   | RAB11FIP1                                    | 0.227348395 | 0.012979219 | 0.08 | 0.29 |
| 8p#110533_110537  | 8  | 37882239-37913593   | 31355   | GOT1L1                                       | 0.227348395 | 0.012979219 | 0.08 | 0.29 |
| 8p#110539_110544  | 8  | 37936616-37951757   | 15142   | ADRB3                                        | 0.227348395 | 0.012979219 | 0.08 | 0.29 |
| 8p#110548_110566  | 8  | 37998344-38140275   | 141932  | EIF4EBP1, ASH2L, STAR, LSM1                  | 0.227348395 | 0.012979219 | 0.08 | 0.29 |
| 8p#110491_110492  | 8  | 37443238-37461459   | 18222   |                                              | 0.227348395 | 0.012979219 | 0.08 | 0.29 |
| 8q#117084_117089  | 8  | 128812188-128829126 | 16939   | BC042052, M13930, MYC                        | 0.227348395 | 0.012979219 | 0.08 | 0.29 |
| 8p#110840_110841  | 8  | 40986955-41025189   | 38235   |                                              | 0.19375398  | 0.013919479 | 0.05 | 0.22 |
| 8p#110787_110793  | 8  | 40291498-40419776   | 128279  |                                              | 0.19375398  | 0.013919479 | 0.05 | 0.22 |
| 8p#110794_110806  | 8  | 40462162-40597631   | 135470  | ZMAT4                                        | 0.19375398  | 0.013919479 | 0.05 | 0.22 |
| 8q#117956_117972  | 8  | 141310698-141456935 | 146238  | NIBP                                         | 0.19375398  | 0.013919479 | 0.05 | 0.22 |
| 8q#117973_117979  | 8  | 141473079-141531064 | 57986   | NIBP                                         | 0.19375398  | 0.013919479 | 0.05 | 0.22 |
| 8q#118033_118049  | 8  | 141936333-142072345 | 136013  | PTK2                                         | 0.19375398  | 0.013919479 | 0.05 | 0.22 |
| 8q#118050_118062  | 8  | 142077364-14223436  | 146073  | PTK2, DENND3                                 | 0.19375398  | 0.013919479 | 0.05 | 0.22 |
| 8q#118077_118078  | 8  | 142359106-142368636 | 9531    |                                              | 0.19375398  | 0.013919479 | 0.05 | 0.22 |
| 8q#118064_118068  | 8  | 142238969-142274992 | 36024   | DENND3                                       | 0.19375398  | 0.013919479 | 0.05 | 0.22 |
| 8q#118072_118076  | 8  | 142300511-142339717 | 39207   | AK128212                                     | 0.19375398  | 0.013919479 | 0.05 | 0.22 |
| 8q#118069_118071  | 8  | 142274933-142287495 | 12563   | DENND3, BC007262                             | 0.19375398  | 0.013919479 | 0.05 | 0.22 |
| 8p#110773_110776  | 8  | 40018285-40094811   | 76527   |                                              | 0.147539395 | 0.01433266  | 0.03 | 0.20 |
| 8p#110720_110726  | 8  | 39511632-39599507   | 87876   | ADAM18                                       | 0.147539395 | 0.01433266  | 0.03 | 0.20 |
| 8p#110777_110782  | 8  | 40107557-40137654   | 30098   | C8orf4                                       | 0.147539395 | 0.01433266  | 0.03 | 0.20 |
| 8p#110708_110719  | 8  | 39435320-39505315   | 69996   | X89654                                       | 0.147539395 | 0.01433266  | 0.03 | 0.20 |
| 8p#110967_110971  | 8  | 42386243-42416328   | 30086   | AK023965, SLC20A2                            | 0.147539395 | 0.01433266  | 0.03 | 0.20 |
| 8p#110961_110966  | 8  | 42353370-42379452   | 26083   | DKK4, AK023965, VDACC3                       | 0.147539395 | 0.01433266  | 0.03 | 0.20 |
| 8q#118133_118142  | 8  | 142935476-143041822 | 106347  |                                              | 0.147539395 | 0.01433266  | 0.03 | 0.20 |
| 11q#145256_145258 | 11 | 69721335-69728537   | 7203    | FADD                                         | 0.315906696 | 0.017976693 | 0.15 | 0.37 |
| 11q#145234_145242 | 11 | 69370206-69580819   | 210614  | BC039105                                     | 0.315906696 | 0.017976693 | 0.15 | 0.37 |
| 11q#145243_145255 | 11 | 69599341-69711968   | 112628  | TMEM16A                                      | 0.315906696 | 0.017976693 | 0.15 | 0.37 |



|                   |    |                     |         |                                                   |             |             |      |      |
|-------------------|----|---------------------|---------|---------------------------------------------------|-------------|-------------|------|------|
| 8q#113009_113147  | 8  | 73603188-74991383   | 1388196 | P, AK097340, RPL7, RDH10, AK128216, AK056720, AK0 | 0.228990649 | 0.018258399 | 0.07 | 0.24 |
| 8q#113825_113852  | 8  | 86194621-86433041   | 238421  | LRRCC1, BC039099, E2F5, AK093753, CA13, CA1       | 0.228990649 | 0.018258399 | 0.07 | 0.24 |
| 8q#113591_113604  | 8  | 82439287-82566189   | 126903  | PMP2, FABP4                                       | 0.228990649 | 0.018258399 | 0.07 | 0.24 |
| 8q#114068_114111  | 8  | 89200169-89780047   | 579879  | MMP16                                             | 0.228990649 | 0.018258399 | 0.07 | 0.24 |
| 8q#114150_114214  | 8  | 90862445-91872333   | 1009889 | 2, C8orf1, NBN, DECR1, CALB1, S46006, TMEM64, BC1 | 0.228990649 | 0.018258399 | 0.07 | 0.24 |
| 8q#114249_114292  | 8  | 92155231-92612951   | 457721  | OTUD6B, AK097393, BC060784, SLC26A7               | 0.228990649 | 0.018258399 | 0.07 | 0.24 |
| 8p#110480_110483  | 8  | 37121842-37192999   | 71158   |                                                   | 0.228990649 | 0.018258399 | 0.07 | 0.24 |
| 8q#112986_113008  | 8  | 73168719-73585983   | 417265  |                                                   | 0.228990649 | 0.018258399 | 0.07 | 0.24 |
| 8q#113245_113254  | 8  | 76344164-76514054   | 169891  | BC062758, BC054009                                | 0.228990649 | 0.018258399 | 0.07 | 0.24 |
| 8q#113683_113684  | 8  | 83730313-83753923   | 23611   |                                                   | 0.228990649 | 0.018258399 | 0.07 | 0.24 |
| 8q#113674_113682  | 8  | 83493595-83707357   | 213763  |                                                   | 0.228990649 | 0.018258399 | 0.07 | 0.24 |
| 8q#113685_113687  | 8  | 83805547-83869371   | 63825   |                                                   | 0.228990649 | 0.018258399 | 0.07 | 0.24 |
| 8q#113717_113737  | 8  | 84732171-85258857   | 526687  | LOC138046                                         | 0.228990649 | 0.018258399 | 0.07 | 0.24 |
| 8q#113654_113673  | 8  | 83038864-83435568   | 396705  |                                                   | 0.228990649 | 0.018258399 | 0.07 | 0.24 |
| 8q#114034_114035  | 8  | 88673876-88691167   | 17292   |                                                   | 0.228990649 | 0.018258399 | 0.07 | 0.24 |
| 8q#112973_112985  | 8  | 73033160-73158623   | 125464  | AK123315, TRPA1                                   | 0.228990649 | 0.018258399 | 0.07 | 0.24 |
| 8q#113706_113716  | 8  | 84443374-84707075   | 263702  |                                                   | 0.228990649 | 0.018258399 | 0.07 | 0.24 |
| 8q#113934_113981  | 8  | 87548390-88014696   | 466307  | WWP1, FAM82B, CPNE3, CNGB3, CNBD1                 | 0.228990649 | 0.018258399 | 0.07 | 0.24 |
| 8q#112895_112900  | 8  | 71779510-71862451   | 82942   | XKR9                                              | 0.228990649 | 0.018258399 | 0.07 | 0.24 |
| 8q#112969_112972  | 8  | 72949261-73020051   | 70791   | AK123315                                          | 0.228990649 | 0.018258399 | 0.07 | 0.24 |
| 8q#112955_112968  | 8  | 72758345-72940978   | 182634  | MSC, AK123315                                     | 0.228990649 | 0.018258399 | 0.07 | 0.24 |
| 8p#110567_110573  | 8  | 38146564-38185996   | 39433   | LSM1, BAG4                                        | 0.256230183 | 0.02429638  | 0.08 | 0.27 |
| 8p#110584_110586  | 8  | 38252325-38266148   | 13824   | WHSC1L1                                           | 0.256230183 | 0.02429638  | 0.08 | 0.27 |
| 8p#110574_110583  | 8  | 38195486-38245162   | 49677   | DDHD2, PPAPDC1B                                   | 0.256230183 | 0.02429638  | 0.08 | 0.27 |
| 8q#113467_113468  | 8  | 80915570-80934348   | 18779   | AK055332                                          | 0.256230183 | 0.02429638  | 0.08 | 0.27 |
| 8q#113490_113499  | 8  | 81155170-81232913   | 77744   | TPD52                                             | 0.256230183 | 0.02429638  | 0.08 | 0.27 |
| 8q#113787_113796  | 8  | 85698213-85783705   | 85493   | LOC138046                                         | 0.256230183 | 0.02429638  | 0.08 | 0.27 |
| 8q#113874_113878  | 8  | 86598194-86726033   | 127840  |                                                   | 0.256230183 | 0.02429638  | 0.08 | 0.27 |
| 8q#113500_113511  | 8  | 81242892-81514651   | 271760  | TPD52                                             | 0.256230183 | 0.02429638  | 0.08 | 0.27 |
| 8q#113887_113906  | 8  | 87021041-87244388   | 223348  | PSKH2, ATP6V0D2                                   | 0.256230183 | 0.02429638  | 0.08 | 0.27 |
| 11q#145281_145282 | 11 | 69929054-69939945   | 10892   | CTTN                                              | 0.306404335 | 0.025677666 | 0.14 | 0.34 |
| 11q#145491_145497 | 11 | 72071908-72122420   | 50513   | CENTD2, AB209473                                  | 0           | 0.025826113 | 0.00 | 0.10 |
| 11q#145606_145609 | 11 | 73097162-73119489   | 22328   | RAB6A                                             | 0           | 0.025826113 | 0.00 | 0.10 |
| 11q#145761_145764 | 11 | 74533488-74557894   | 24407   | SLCO2B1                                           | 0           | 0.025826113 | 0.00 | 0.10 |
| 11q#145739_145750 | 11 | 74308723-74396411   | 87689   | AK056364, SPCS2, CR607144, BC065746, NEU3         | 0           | 0.025826113 | 0.00 | 0.10 |
| 11q#145735_145738 | 11 | 74265911-74300233   | 34323   | AK056364                                          | 0           | 0.025826113 | 0.00 | 0.10 |
| 20q#216931_216937 | 20 | 52190285-52229938   | 39654   | CYP24A1                                           | 0           | 0.025826113 | 0.00 | 0.10 |
| 17q#199236_199247 | 17 | 64231936-64425234   | 193299  | ABCA8                                             | 0           | 0.025826113 | 0.00 | 0.10 |
| 20q#216920_216925 | 20 | 52062957-52101367   | 38411   | BCAS1                                             | 0           | 0.025826113 | 0.00 | 0.10 |
| 20q#216929_216930 | 20 | 52146958-52175954   | 28997   |                                                   | 0           | 0.025826113 | 0.00 | 0.10 |
| 20q#216926_216928 | 20 | 52108626-52130381   | 21756   | BCAS1                                             | 0           | 0.025826113 | 0.00 | 0.10 |
| 11q#146470_146472 | 11 | 83505923-83523031   | 17109   | DLG2                                              | 0           | 0.025826113 | 0.00 | 0.10 |
| 8p#110738_110745  | 8  | 39693726-39746308   | 52583   | ADAM18, AY358321, ADAM2                           | 0.173456259 | 0.029975296 | 0.03 | 0.17 |
| 8p#110729_110737  | 8  | 39625172-39683452   | 58281   | ADAM18                                            | 0.173456259 | 0.029975296 | 0.03 | 0.17 |
| 8p#110727_110728  | 8  | 39605695-39614031   | 8337    | ADAM18                                            | 0.173456259 | 0.029975296 | 0.03 | 0.17 |
| 8p#110769_110772  | 8  | 39971727-40003806   | 32080   | AK128691                                          | 0.173456259 | 0.029975296 | 0.03 | 0.17 |
| 11q#145373_145374 | 11 | 70849757-70855490   | 5734    | NADSYN1                                           | 0.173456259 | 0.029975296 | 0.03 | 0.17 |
| 11q#145358_145365 | 11 | 70748178-70803966   | 55789   | FLJ42102                                          | 0.173456259 | 0.029975296 | 0.03 | 0.17 |
| 11q#145375_145376 | 11 | 70866286-70876131   | 9846    | NADSYN1                                           | 0.173456259 | 0.029975296 | 0.03 | 0.17 |
| 8p#110972_110988  | 8  | 4242880-42532970    | 110091  | SLC20A2, C8orf40                                  | 0.173456259 | 0.029975296 | 0.03 | 0.17 |
| 8q#118555_118562  | 8  | 146193476-146264902 | 71427   | BC065734, C8orf77, C8orf33                        | 0.173456259 | 0.029975296 | 0.03 | 0.17 |
| 8q#118550_118554  | 8  | 146144778-146189034 | 44257   | ZNF16, BC016287                                   | 0.173456259 | 0.029975296 | 0.03 | 0.17 |
| 11q#145345_145350 | 11 | 70534691-70581405   | 46715   | DQ152234, AK096045                                | 0.173456259 | 0.029975296 | 0.03 | 0.17 |
| 11q#145366_145369 | 11 | 70810008-70827784   | 17777   | FLJ42102, DHCR7                                   | 0.173456259 | 0.029975296 | 0.03 | 0.17 |
| 11q#145370_145372 | 11 | 70833309-70843794   | 10486   | DHCR7, NADSYN1                                    | 0.173456259 | 0.029975296 | 0.03 | 0.17 |

|                   |    |                     |         |                                                                 |             |             |      |      |
|-------------------|----|---------------------|---------|-----------------------------------------------------------------|-------------|-------------|------|------|
| 8q#118461_118474  | 8  | 145571760-145635884 | 64125   | ADCK5, CPSF1, AK056900, SLC39A4, VPS28, NFKBIL2                 | 0.173456259 | 0.029975296 | 0.03 | 0.17 |
| 8q#118542_118549  | 8  | 146077440-146131902 | 54463   | ZNF250, ZNF16                                                   | 0.173456259 | 0.029975296 | 0.03 | 0.17 |
| 11q#145351_145355 | 11 | 70592909-70668708   | 75800   | AK096045                                                        | 0.173456259 | 0.029975296 | 0.03 | 0.17 |
| 8p#110959_110960  | 8  | 42341996-42348409   | 6414    | POLB                                                            | 0.173456259 | 0.029975296 | 0.03 | 0.17 |
| 8q#118143_118151  | 8  | 143051242-143155389 | 104148  |                                                                 | 0.173456259 | 0.029975296 | 0.03 | 0.17 |
| 11q#145127_145130 | 11 | 68260570-68278894   | 18325   | MTL5, CPT1A                                                     | 0.173456259 | 0.029975296 | 0.03 | 0.17 |
| 11q#145274_145280 | 11 | 69873295-69916904   | 43610   | PPFIA1, AK125463                                                | 0.35105655  | 0.032275262 | 0.15 | 0.34 |
| 11q#145272_145273 | 11 | 69859410-69867355   | 7946    | PPFIA1                                                          | 0.35105655  | 0.032275262 | 0.15 | 0.34 |
| 11q#145195_145203 | 11 | 69104365-69187704   | 83340   | CCND1                                                           | 0.35105655  | 0.032275262 | 0.15 | 0.34 |
| 11q#145224_145229 | 11 | 69315768-69339391   | 23624   | FGF3                                                            | 0.35105655  | 0.032275262 | 0.15 | 0.34 |
| 11q#145204_145209 | 11 | 69191919-69205108   | 13190   | ORAOV1                                                          | 0.35105655  | 0.032275262 | 0.15 | 0.34 |
| 11q#145213_145223 | 11 | 69230956-69311422   | 80467   | FGF4                                                            | 0.35105655  | 0.032275262 | 0.15 | 0.34 |
| 11q#145230_145233 | 11 | 69339332-69357439   | 18108   | FGF3                                                            | 0.35105655  | 0.032275262 | 0.15 | 0.34 |
| 11q#145210_145212 | 11 | 69214528-69223664   | 9137    | FGF19                                                           | 0.35105655  | 0.032275262 | 0.15 | 0.34 |
| 11q#145259_145266 | 11 | 69730962-69797458   | 66497   | FADD, PPFIA1                                                    | 0.357660872 | 0.034744842 | 0.17 | 0.37 |
| 8q#114726_114772  | 8  | 98196004-98753988   | 557985  | PGCP, AK091342, TSPYL5, MTDH                                    | 0.262254808 | 0.035402659 | 0.07 | 0.22 |
| 8q#114675_114725  | 8  | 97729387-98182574   | 453188  | PGCP                                                            | 0.262254808 | 0.035402659 | 0.07 | 0.22 |
| 8q#116680_116694  | 8  | 123922055-124039391 | 117337  | ZHX2                                                            | 0.262254808 | 0.035402659 | 0.07 | 0.22 |
| 8q#117891_117894  | 8  | 140752080-140777621 | 25542   | KCNK9                                                           | 0.262254808 | 0.035402659 | 0.07 | 0.22 |
| 8q#117895_117898  | 8  | 140782694-140810425 | 27732   | KCNK9                                                           | 0.262254808 | 0.035402659 | 0.07 | 0.22 |
| 8q#116007_116062  | 8  | 114019199-114462092 | 442894  | CSMD3                                                           | 0.262254808 | 0.035402659 | 0.07 | 0.22 |
| 8q#114652_114674  | 8  | 97515515-97719105   | 203591  | SDC2                                                            | 0.262254808 | 0.035402659 | 0.07 | 0.22 |
| 8q#117903_117929  | 8  | 140858949-141084242 | 225294  | NIBP                                                            | 0.262254808 | 0.035402659 | 0.07 | 0.22 |
| 8q#117899_117902  | 8  | 140815701-140851180 | 35480   | NIBP                                                            | 0.262254808 | 0.035402659 | 0.07 | 0.22 |
| 8q#117930_117938  | 8  | 141093485-141153033 | 59549   | NIBP                                                            | 0.262254808 | 0.035402659 | 0.07 | 0.22 |
| 8q#117241_117287  | 8  | 131157726-131579047 | 421322  | DDEF1, AX721314                                                 | 0.262254808 | 0.035402659 | 0.07 | 0.22 |
| 8q#117288_117305  | 8  | 131610146-131919396 | 309251  | ADCY8                                                           | 0.262254808 | 0.035402659 | 0.07 | 0.22 |
| 8q#117534_117551  | 8  | 134541526-134781502 | 239977  | ST3GAL1, CR619813                                               | 0.262254808 | 0.035402659 | 0.07 | 0.22 |
| 8q#117648_117679  | 8  | 136535220-137027478 | 492259  | KHDRBS3                                                         | 0.262254808 | 0.035402659 | 0.07 | 0.22 |
| 8q#117693_117699  | 8  | 137301071-137501751 | 200681  |                                                                 | 0.262254808 | 0.035402659 | 0.07 | 0.22 |
| 8q#117702_117707  | 8  | 137607312-137737865 | 130554  |                                                                 | 0.262254808 | 0.035402659 | 0.07 | 0.22 |
| 8q#117715_117738  | 8  | 137952089-138585982 | 633894  |                                                                 | 0.262254808 | 0.035402659 | 0.07 | 0.22 |
| 8q#114297_114629  | 8  | 92719509-97249316   | 4529808 | 67, PPM2C, CDH17, GEM, RAD54B, KIAA1429, RBM35, MTERFD1, PTDSS1 | 0.262254808 | 0.035402659 | 0.07 | 0.22 |
| 8q#114636_114648  | 8  | 97327227-97423471   | 96245   |                                                                 | 0.262254808 | 0.035402659 | 0.07 | 0.22 |
| 8q#117700_117701  | 8  | 137538646-137579719 | 41074   |                                                                 | 0.262254808 | 0.035402659 | 0.07 | 0.22 |
| 8q#117939_117955  | 8  | 141159454-141303124 | 143671  | NIBP                                                            | 0.262254808 | 0.035402659 | 0.07 | 0.22 |
| 8p#110622_110623  | 8  | 38667707-38687938   | 20232   |                                                                 | 0.262254808 | 0.035402659 | 0.07 | 0.22 |
| 8q#117708_117714  | 8  | 137762418-137919367 | 156950  |                                                                 | 0.262254808 | 0.035402659 | 0.07 | 0.22 |
| 8q#114112_114117  | 8  | 89796449-89973673   | 177225  |                                                                 | 0.262254808 | 0.035402659 | 0.07 | 0.22 |
| 8q#114120_114149  | 8  | 90087089-90851298   | 764210  | CR590356, RIPK2                                                 | 0.262254808 | 0.035402659 | 0.07 | 0.22 |
| 8q#114630_114635  | 8  | 97270632-97321078   | 50447   | UQCRB, MTERFD1                                                  | 0.262254808 | 0.035402659 | 0.07 | 0.22 |
| 8q#114649_114651  | 8  | 97435814-97472867   | 37054   |                                                                 | 0.262254808 | 0.035402659 | 0.07 | 0.22 |
| 8q#114118_114119  | 8  | 90000352-90028689   | 28338   |                                                                 | 0.262254808 | 0.035402659 | 0.07 | 0.22 |
| 8q#114031_114033  | 8  | 88599436-88649344   | 49909   |                                                                 | 0.262254808 | 0.035402659 | 0.07 | 0.22 |
| 8q#113982_114030  | 8  | 88021017-88563034   | 542018  | CNBD1                                                           | 0.262254808 | 0.035402659 | 0.07 | 0.22 |
| 8q#112901_112921  | 8  | 71898193-72299092   | 400900  | EYA1                                                            | 0.262254808 | 0.035402659 | 0.07 | 0.22 |
| 8q#112923_112954  | 8  | 72314292-72714795   | 400504  | EYA1, BC035138                                                  | 0.262254808 | 0.035402659 | 0.07 | 0.22 |
| 8q#112882_112894  | 8  | 71663553-71762912   | 99360   | TRAM1, AL833348, LACTB2, XKR9                                   | 0.262254808 | 0.035402659 | 0.07 | 0.22 |
| 8q#112869_112880  | 8  | 71454673-71648465   | 193793  | NCOA2, AK024336, TRAM1                                          | 0.262254808 | 0.035402659 | 0.07 | 0.22 |
| 11q#145138_145139 | 11 | 68351507-68358181   | 6675    | CPT1A                                                           | 0.262254808 | 0.035402659 | 0.07 | 0.22 |
| 11q#145294_145299 | 11 | 70045289-70105109   | 59821   | SHANK2                                                          | 0.329204016 | 0.038706637 | 0.12 | 0.29 |
| 11q#145285_145290 | 11 | 69968689-70012823   | 44135   | SHANK2                                                          | 0.329204016 | 0.038706637 | 0.12 | 0.29 |
| 11q#145522_145524 | 11 | 72318677-72335322   | 16646   | FCHSD2                                                          | 0.12655916  | 0.040863027 | 0.02 | 0.12 |
| 11q#145525_145535 | 11 | 72341966-72432083   | 90118   | FCHSD2                                                          | 0.12655916  | 0.040863027 | 0.02 | 0.12 |
| 17q#199178_199184 | 17 | 63587647-63709512   | 121866  | CR595591, AK126078                                              | 0.12655916  | 0.040863027 | 0.02 | 0.12 |



|            |        |    |                     |        |                                                    |             |             |      |      |
|------------|--------|----|---------------------|--------|----------------------------------------------------|-------------|-------------|------|------|
| 8p#110766  | 110768 | 8  | 39950926-39962394   | 11469  | AK128691                                           | 0.207958431 | 0.060900114 | 0.03 | 0.15 |
| 8p#110465  | 110467 | 8  | 36835421-36850864   | 15444  | BC028701                                           | 0.207958431 | 0.060900114 | 0.03 | 0.15 |
| 11q#145871 | 145877 | 11 | 75357518-75421585   | 64068  | UVRAG                                              | 0.207958431 | 0.060900114 | 0.03 | 0.15 |
| 11q#145852 | 145855 | 11 | 75200505-75224419   | 23915  | UVRAG                                              | 0.207958431 | 0.060900114 | 0.03 | 0.15 |
| 11q#145865 | 145867 | 11 | 75315081-75330505   | 15425  | UVRAG                                              | 0.207958431 | 0.060900114 | 0.03 | 0.15 |
| 11q#145868 | 145870 | 11 | 75337802-75350249   | 12448  | UVRAG                                              | 0.207958431 | 0.060900114 | 0.03 | 0.15 |
| 11q#145115 | 145126 | 11 | 68142018-68254945   | 112928 | GAL, MTL5                                          | 0.207958431 | 0.060900114 | 0.03 | 0.15 |
| 11q#146201 | 146202 | 11 | 78565177-78576218   | 11042  | AF009227                                           | 0.207958431 | 0.060900114 | 0.03 | 0.15 |
| 11q#145485 | 145490 | 11 | 72024096-72061883   | 37788  | PDE2A                                              | 0           | 0.065924552 | 0.00 | 0.07 |
| 11q#145610 | 145613 | 11 | 73133700-73169890   | 36191  | RAB6A                                              | 0           | 0.065924552 | 0.00 | 0.07 |
| 11q#145483 | 145484 | 11 | 72016501-72020078   | 3578   | PDE2A                                              | 0           | 0.065924552 | 0.00 | 0.07 |
| 11q#145614 | 145616 | 11 | 73177047-73193751   | 16705  | MRPL48                                             | 0           | 0.065924552 | 0.00 | 0.07 |
| 11q#145617 | 145632 | 11 | 73200297-73316373   | 116077 | MRPL48, CHCHD8, WDR71                              | 0           | 0.065924552 | 0.00 | 0.07 |
| 11q#145662 | 145664 | 11 | 73543893-73561471   | 17579  | DKFZP586P0123, PPME1                               | 0           | 0.065924552 | 0.00 | 0.07 |
| 11q#145639 | 145643 | 11 | 73368746-73392407   | 23662  | UCP2, UCP3                                         | 0           | 0.065924552 | 0.00 | 0.07 |
| 11q#145477 | 145482 | 11 | 71992354-72013123   | 20770  | PDE2A                                              | 0           | 0.065924552 | 0.00 | 0.07 |
| 11q#145470 | 145472 | 11 | 71947143-71965329   | 18187  | PDE2A                                              | 0           | 0.065924552 | 0.00 | 0.07 |
| 11q#145473 | 145476 | 11 | 71971569-71988430   | 16862  | PDE2A                                              | 0           | 0.065924552 | 0.00 | 0.07 |
| 11q#145658 | 145661 | 11 | 73511652-73537538   | 25887  | DKFZP586P0123                                      | 0           | 0.065924552 | 0.00 | 0.07 |
| 11q#145665 | 145667 | 11 | 73568889-73586636   | 17748  | PPME1                                              | 0           | 0.065924552 | 0.00 | 0.07 |
| 11q#145645 | 145647 | 11 | 73406120-73419703   | 13584  | BC035599                                           | 0           | 0.065924552 | 0.00 | 0.07 |
| 20q#216938 | 216940 | 20 | 52234424-52247247   | 12824  |                                                    | 0           | 0.065924552 | 0.00 | 0.07 |
| 20q#216941 | 216953 | 20 | 52253876-52490986   | 237111 | PFDN4                                              | 0           | 0.065924552 | 0.00 | 0.07 |
| 17q#199268 | 199289 | 17 | 64632594-64817098   | 184505 | ABCA6, ABCA10, ABCA5                               | 0           | 0.065924552 | 0.00 | 0.07 |
| 11q#145721 | 145734 | 11 | 74123286-74251692   | 128407 | AB082522, AK056364                                 | 0           | 0.065924552 | 0.00 | 0.07 |
| 11q#145648 | 145657 | 11 | 73426111-73502453   | 76343  | DKFZP586P0123                                      | 0           | 0.065924552 | 0.00 | 0.07 |
| 20q#216954 | 216958 | 20 | 52501284-52543408   | 42125  | DOK5                                               | 0           | 0.065924552 | 0.00 | 0.07 |
| 17q#199248 | 199267 | 17 | 64440930-64619913   | 178984 | ABCA8, ABCA9, ABCA6                                | 0           | 0.065924552 | 0.00 | 0.07 |
| 17q#199965 | 199967 | 17 | 72402560-72417588   | 15029  | MGAT5B                                             | 0           | 0.065924552 | 0.00 | 0.07 |
| 17q#199909 | 199910 | 17 | 71951534-71963300   | 11767  | UBE2O, BC092430                                    | 0           | 0.065924552 | 0.00 | 0.07 |
| 8p#110179  | 110193 | 8  | 32349470-32462973   | 113504 | NRG1                                               | 0           | 0.065924552 | 0.00 | 0.07 |
| 6q#89609   | 89637  | 6  | 112713377-113370881 | 657505 | LOC442247                                          | 0           | 0.065924552 | 0.00 | 0.07 |
| 6q#89727   | 89737  | 6  | 115160607-115754878 | 594272 |                                                    | 0           | 0.065924552 | 0.00 | 0.07 |
| 6q#89758   | 89763  | 6  | 116427569-116469311 | 41743  | FRK                                                | 0           | 0.065924552 | 0.00 | 0.07 |
| 6q#89155   | 89186  | 6  | 108146960-108528752 | 381793 | SCML4, AK093571, SEC63, OSTM1                      | 0           | 0.065924552 | 0.00 | 0.07 |
| 6q#89748   | 89757  | 6  | 116232190-116414338 | 182149 | FRK                                                | 0           | 0.065924552 | 0.00 | 0.07 |
| 6q#89764   | 89784  | 6  | 116481339-116656631 | 175293 | FRK, NT5DC1                                        | 0           | 0.065924552 | 0.00 | 0.07 |
| 6q#89638   | 89647  | 6  | 113408190-113685756 | 277567 |                                                    | 0           | 0.065924552 | 0.00 | 0.07 |
| 6q#89243   | 89292  | 6  | 109118180-109659815 | 541636 | 927446, CR627448, ARMC2, SESN1, BC064365, C6orf    | 0           | 0.065924552 | 0.00 | 0.07 |
| 6q#89589   | 89608  | 6  | 112536988-112695796 | 158809 | LAMA4                                              | 0           | 0.065924552 | 0.00 | 0.07 |
| 6q#89187   | 89242  | 6  | 108561453-109106330 | 544878 | AF520419, BC031282, NR2E1, SNX3, LACE1, FOXO3A     | 0           | 0.065924552 | 0.00 | 0.07 |
| 11q#146473 | 146481 | 11 | 83534566-83617818   | 83253  | DLG2                                               | 0           | 0.065924552 | 0.00 | 0.07 |
| 8q#117552  | 117600 | 8  | 134815800-135771727 | 955928 | ZNF406                                             | 0.303775269 | 0.066242529 | 0.07 | 0.20 |
| 8q#117610  | 117647 | 8  | 135868705-136525223 | 656519 | AL833303, AK057402, BC045817                       | 0.303775269 | 0.066242529 | 0.07 | 0.20 |
| 8q#117739  | 117740 | 8  | 138606515-138653365 | 46851  |                                                    | 0.303775269 | 0.066242529 | 0.07 | 0.20 |
| 8q#117601  | 117609 | 8  | 135779861-135860602 | 80742  | ZNF406                                             | 0.303775269 | 0.066242529 | 0.07 | 0.20 |
| 8p#110808  | 110820 | 8  | 40619934-40735617   | 115684 | ZMAT4                                              | 0.303775269 | 0.066242529 | 0.07 | 0.20 |
| 8p#110830  | 110834 | 8  | 40832253-40863334   | 31082  | ZMAT4                                              | 0.303775269 | 0.066242529 | 0.07 | 0.20 |
| 8p#110821  | 110829 | 8  | 40744369-40823546   | 79178  | ZMAT4                                              | 0.303775269 | 0.066242529 | 0.07 | 0.20 |
| 8q#112520  | 112529 | 8  | 67823437-67897203   | 73767  | SGK3                                               | 0.303775269 | 0.066242529 | 0.07 | 0.20 |
| 8q#112518  | 112519 | 8  | 67807035-67817648   | 10614  | SGK3                                               | 0.303775269 | 0.066242529 | 0.07 | 0.20 |
| 8q#112813  | 112868 | 8  | 70890705-71444457   | 553753 | SLCO5A1, BC038549, PRDM14, NCOA2                   | 0.303775269 | 0.066242529 | 0.07 | 0.20 |
| 8q#112424  | 112471 | 8  | 66840555-67407537   | 566983 | PDE7A, DNAJC5B, TRIM55, CRH                        | 0.303775269 | 0.066242529 | 0.07 | 0.20 |
| 8q#112491  | 112517 | 8  | 67596813-67801738   | 204926 | 37, BC101187, VCIPI1, AK123514, BX649057, C8orf44, | 0.303775269 | 0.066242529 | 0.07 | 0.20 |
| 8q#112799  | 112812 | 8  | 70779833-70880440   | 100608 | SLCO5A1                                            | 0.303775269 | 0.066242529 | 0.07 | 0.20 |



|                   |    |                     |         |                                              |             |             |      |      |
|-------------------|----|---------------------|---------|----------------------------------------------|-------------|-------------|------|------|
| 8q#112141_112156  | 8  | 62726192-62949565   | 22374   | ASPH                                         | 0.303775269 | 0.066242529 | 0.07 | 0.20 |
| 8q#112096_112140  | 8  | 62284280-62718547   | 434268  | MGC34646, ASPH                               | 0.303775269 | 0.066242529 | 0.07 | 0.20 |
| 8q#112157_112158  | 8  | 62969998-63008458   | 38461   |                                              | 0.303775269 | 0.066242529 | 0.07 | 0.20 |
| 8q#111676_111689  | 8  | 56309637-56422182   | 112546  | XKR4                                         | 0.303775269 | 0.066242529 | 0.07 | 0.20 |
| 11q#145300_145306 | 11 | 70110393-70161915   | 51523   | SHANK2                                       | 0.371015271 | 0.067423806 | 0.12 | 0.27 |
| 11q#145291_145293 | 11 | 70020742-70035125   | 14384   | SHANK2                                       | 0.382969231 | 0.074897159 | 0.14 | 0.29 |
| 8q#117795_117890  | 8  | 139407719-140741532 | 1333814 | BC037288, AB196635, COL22A1, AK090707, KCNK9 | 0.333061339 | 0.078727269 | 0.08 | 0.22 |
| 8q#116063_116073  | 8  | 114473389-114590226 | 116838  | CSMD3                                        | 0.333061339 | 0.078727269 | 0.08 | 0.22 |
| 8q#117757_117794  | 8  | 138978739-139399223 | 420485  | AK127771, CR936831, LOC51059, BC037288       | 0.333061339 | 0.078727269 | 0.08 | 0.22 |
| 8q#117680_117692  | 8  | 137053745-137259260 | 205516  |                                              | 0.333061339 | 0.078727269 | 0.08 | 0.22 |
| 8q#117753_117756  | 8  | 138914259-138954401 | 40143   | AK127771                                     | 0.333061339 | 0.078727269 | 0.08 | 0.22 |
| 8q#117352_117364  | 8  | 132805726-133031467 | 225742  | BC071611, KIAA0143                           | 0.333061339 | 0.078727269 | 0.08 | 0.22 |
| 8q#117365_117416  | 8  | 133041050-133446674 | 405625  | KIAA0143, HHLA1, KCNQ3                       | 0.333061339 | 0.078727269 | 0.08 | 0.22 |
| 8q#117417_117428  | 8  | 133453608-133555655 | 102048  | KCNQ3                                        | 0.333061339 | 0.078727269 | 0.08 | 0.22 |
| 8q#117459_117480  | 8  | 133881400-134042501 | 161102  | PHF20L1, TG                                  | 0.333061339 | 0.078727269 | 0.08 | 0.22 |
| 8q#117528_117533  | 8  | 134459068-134535159 | 76092   |                                              | 0.333061339 | 0.078727269 | 0.08 | 0.22 |
| 8q#117481_117527  | 8  | 134050867-134439180 | 388314  | TG, WISP1, NDRG1                             | 0.333061339 | 0.078727269 | 0.08 | 0.22 |
| 8q#112710_112736  | 8  | 69645163-69884558   | 239396  | C8orf34                                      | 0.333061339 | 0.078727269 | 0.08 | 0.22 |
| 8q#112737_112746  | 8  | 69893426-70046493   | 153068  | C8orf34, AK055514                            | 0.333061339 | 0.078727269 | 0.08 | 0.22 |
| 11q#145144_145156 | 11 | 68417608-68508223   | 90616   | MRPL21, IGHMBP2                              | 0.333061339 | 0.078727269 | 0.08 | 0.22 |
| 8p#110897_110905  | 8  | 41723484-41803657   | 80174   | ANK1, AB209418                               | 0.263800435 | 0.086316232 | 0.05 | 0.17 |
| 8p#110906_110909  | 8  | 41813726-41854855   | 41130   | AB209418                                     | 0.263800435 | 0.086316232 | 0.05 | 0.17 |
| 8p#110910_110923  | 8  | 41878081-41996369   | 118289  | MYST3                                        | 0.263800435 | 0.086316232 | 0.05 | 0.17 |
| 8p#110924_110929  | 8  | 42008140-42062378   | 54239   | MYST3                                        | 0.263800435 | 0.086316232 | 0.05 | 0.17 |
| 8p#110666_110672  | 8  | 39047989-39094812   | 46824   | ADAM9, ADAM32                                | 0.263800435 | 0.086316232 | 0.05 | 0.17 |
| 8p#110700_110702  | 8  | 39356595-39368568   | 11974   | LOC651362                                    | 0.263800435 | 0.086316232 | 0.05 | 0.17 |
| 11q#145337_145344 | 11 | 70490787-70530781   | 39995   | DQ152234                                     | 0.263800435 | 0.086316232 | 0.05 | 0.17 |
| 8p#110930_110940  | 8  | 42079983-42167003   | 87021   | AP3M2, FLAT                                  | 0.263800435 | 0.086316232 | 0.05 | 0.17 |
| 8p#110681_110690  | 8  | 39198153-39268650   | 70498   | ADAM32                                       | 0.263800435 | 0.086316232 | 0.05 | 0.17 |
| 8p#110942_110958  | 8  | 42191493-42337801   | 146309  | AK023965, KBKB, POLB                         | 0.263800435 | 0.086316232 | 0.05 | 0.17 |
| 11q#145953_145966 | 11 | 76228831-76364976   | 136146  | PHCA                                         | 0.263800435 | 0.086316232 | 0.05 | 0.17 |
| 11q#145967_145975 | 11 | 76374332-76437795   | 63464   | PHCA, B3GNT6                                 | 0.263800435 | 0.086316232 | 0.05 | 0.17 |
| 11q#145135_145137 | 11 | 68323254-68339379   | 16126   | CPT1A                                        | 0.263800435 | 0.086316232 | 0.05 | 0.17 |
| 11q#145943_145952 | 11 | 76093938-76218173   | 124236  | LRRCS4                                       | 0.263800435 | 0.086316232 | 0.05 | 0.17 |
| 11q#145909_145914 | 11 | 75760172-75806457   | 46286   | PRKRIR, AK125821                             | 0.263800435 | 0.086316232 | 0.05 | 0.17 |
| 11q#145131_145134 | 11 | 68280954-68305936   | 24983   | CPT1A                                        | 0.263800435 | 0.086316232 | 0.05 | 0.17 |
| 11q#145937_145942 | 11 | 76046219-76076071   | 29853   | LRRCS2                                       | 0.263800435 | 0.086316232 | 0.05 | 0.17 |
| 11q#145934_145935 | 11 | 76031497-76036856   | 5360    |                                              | 0.263800435 | 0.086316232 | 0.05 | 0.17 |
| 8q#113419_113425  | 8  | 79883564-79991669   | 108106  |                                              | 0.354815471 | 0.09388675  | 0.10 | 0.24 |
| 8q#113559_113586  | 8  | 82033723-82359793   | 326071  | PAG1, FABP5, G36744                          | 0.354815471 | 0.09388675  | 0.10 | 0.24 |
| 8q#113587_113589  | 8  | 82367852-82385787   | 17936   |                                              | 0.354815471 | 0.09388675  | 0.10 | 0.24 |
| 8q#113359_113375  | 8  | 78626594-79217110   | 590517  |                                              | 0.354815471 | 0.09388675  | 0.10 | 0.24 |
| 8q#113697_113704  | 8  | 84160967-84360760   | 199794  |                                              | 0.354815471 | 0.09388675  | 0.10 | 0.24 |
| 8q#112641_112683  | 8  | 68995515-69413194   | 417680  | DEPDC2, BC041480, BC041961                   | 0.357077272 | 0.119063003 | 0.07 | 0.17 |
| 8q#112684_112689  | 8  | 69419424-69468258   | 48835   | BC041961                                     | 0.357077272 | 0.119063003 | 0.07 | 0.17 |
| 8q#111134_111136  | 8  | 48585086-48599105   | 14020   | D63480                                       | 0.357077272 | 0.119063003 | 0.07 | 0.17 |
| 8q#111192_111198  | 8  | 49079208-49140620   | 61413   | UBE2V2                                       | 0.357077272 | 0.119063003 | 0.07 | 0.17 |
| 8q#112008_112011  | 8  | 61159379-61251016   | 91638   |                                              | 0.357077272 | 0.119063003 | 0.07 | 0.17 |
| 8q#111137_111182  | 8  | 48616582-49019194   | 402613  | D63480, CEBPD, AK095778, PRKDC               | 0.357077272 | 0.119063003 | 0.07 | 0.17 |
| 8q#112012_112027  | 8  | 61258314-61413809   | 155496  | CA8                                          | 0.357077272 | 0.119063003 | 0.07 | 0.17 |
| 8q#112378_112380  | 8  | 65883275-65917776   | 34502   |                                              | 0.357077272 | 0.119063003 | 0.07 | 0.17 |
| 8q#112375_112377  | 8  | 65854781-65870043   | 15263   | CYP7B1                                       | 0.357077272 | 0.119063003 | 0.07 | 0.17 |
| 8q#112422_112423  | 8  | 66820229-66825817   | 5589    | PDE7A                                        | 0.357077272 | 0.119063003 | 0.07 | 0.17 |
| 8q#112472_112490  | 8  | 67425127-67591305   | 166179  | AK125958, RRS1, ADHFE1, C8orf46              | 0.357077272 | 0.119063003 | 0.07 | 0.17 |
| 8q#111925_111937  | 8  | 59698838-59880762   | 181925  | NSMAF, TOX                                   | 0.357077272 | 0.119063003 | 0.07 | 0.17 |

|                   |    |                   |         |                                                  |  |             |             |      |      |
|-------------------|----|-------------------|---------|--------------------------------------------------|--|-------------|-------------|------|------|
| 8q#111979_111988  | 8  | 60262331-60525999 | 263669  |                                                  |  | 0.357077272 | 0.119063003 | 0.07 | 0.17 |
| 8q#111989_112001  | 8  | 60560440-60942512 | 382073  |                                                  |  | 0.357077272 | 0.119063003 | 0.07 | 0.17 |
| 8q#111183_111191  | 8  | 49032342-49066854 | 34513   | PRKDC, MCM4                                      |  | 0.357077272 | 0.119063003 | 0.07 | 0.17 |
| 8q#112304_112360  | 8  | 64751965-65726496 | 974532  | AK124256, AK124231, AK097150, BHLHB5, CYP7B1     |  | 0.357077272 | 0.119063003 | 0.07 | 0.17 |
| 8q#112361_112374  | 8  | 65734459-65846691 | 112233  | CYP7B1                                           |  | 0.357077272 | 0.119063003 | 0.07 | 0.17 |
| 8q#112381_112382  | 8  | 65961271-65993951 | 32681   |                                                  |  | 0.357077272 | 0.119063003 | 0.07 | 0.17 |
| 8q#112383_112394  | 8  | 66052639-66434359 | 381721  |                                                  |  | 0.357077272 | 0.119063003 | 0.07 | 0.17 |
| 8q#112412_112421  | 8  | 66744638-66809693 | 65056   | MTFR1, BC043498, PDE7A                           |  | 0.357077272 | 0.119063003 | 0.07 | 0.17 |
| 11q#146005_146032 | 11 | 76695269-77000072 | 304804  | PAK1, AQP11                                      |  | 0.357077272 | 0.119063003 | 0.07 | 0.17 |
| 8q#111268_111269  | 8  | 50522918-50546949 | 24032   |                                                  |  | 0.357077272 | 0.119063003 | 0.07 | 0.17 |
| 8q#111200_111202  | 8  | 49161294-49214163 | 52870   |                                                  |  | 0.357077272 | 0.119063003 | 0.07 | 0.17 |
| 8q#111891_111924  | 8  | 59351398-59682981 | 331584  | AK126300, CYP7A1, SDCBP, NSMAF                   |  | 0.357077272 | 0.119063003 | 0.07 | 0.17 |
| 8q#112395_112411  | 8  | 66462399-66733001 | 270603  | AK094960, ARMC1, MTFR1                           |  | 0.357077272 | 0.119063003 | 0.07 | 0.17 |
| 11q#145995_146004 | 11 | 76603764-76688001 | 84238   | MYO7A, GPPD4                                     |  | 0.357077272 | 0.119063003 | 0.07 | 0.17 |
| 8q#111690_111809  | 8  | 56435183-57771894 | 1336712 | PIP, LYN, AK094652, RPS20, MOS, PLAG1, CHCHD7, R |  | 0.357077272 | 0.119063003 | 0.07 | 0.17 |
| 8q#111810_111814  | 8  | 57804199-57940061 | 135863  |                                                  |  | 0.357077272 | 0.119063003 | 0.07 | 0.17 |
| 8q#111384_111388  | 8  | 52021211-52205221 | 184011  |                                                  |  | 0.357077272 | 0.119063003 | 0.07 | 0.17 |
| 8q#111426_111436  | 8  | 52893111-53005574 | 112464  | PCMTD1, BC010693                                 |  | 0.357077272 | 0.119063003 | 0.07 | 0.17 |
| 8q#111422_111425  | 8  | 52802571-52885780 | 83210   |                                                  |  | 0.357077272 | 0.119063003 | 0.07 | 0.17 |
| 8q#111230_111250  | 8  | 49785579-50058332 | 272754  | EFCAB1, SNAI2                                    |  | 0.357077272 | 0.119063003 | 0.07 | 0.17 |
| 8q#111203_111210  | 8  | 49253853-49516944 | 263092  |                                                  |  | 0.357077272 | 0.119063003 | 0.07 | 0.17 |
| 8q#111815_111829  | 8  | 57974100-58212461 | 238362  | BC009639, IMPAD1                                 |  | 0.357077272 | 0.119063003 | 0.07 | 0.17 |
| 8q#111596_111616  | 8  | 55115869-55406596 | 290728  | LYPLA1, MRPL15                                   |  | 0.357077272 | 0.119063003 | 0.07 | 0.17 |
| 8q#111389_111417  | 8  | 52236520-52630832 | 394313  | PXDNL                                            |  | 0.357077272 | 0.119063003 | 0.07 | 0.17 |
| 8q#111437_111514  | 8  | 53038645-53928977 | 890333  | ST18, UNQ9433, RB1CC1                            |  | 0.357077272 | 0.119063003 | 0.07 | 0.17 |
| 8q#111556_111595  | 8  | 54642612-55106223 | 463612  | ATP6V1H, RGS20, TCEA1                            |  | 0.357077272 | 0.119063003 | 0.07 | 0.17 |
| 8q#111418_111421  | 8  | 52669136-52769686 | 100551  |                                                  |  | 0.357077272 | 0.119063003 | 0.07 | 0.17 |
| 11q#145921_145933 | 11 | 75867701-76004522 | 136822  | C11orf30                                         |  | 0.357077272 | 0.119063003 | 0.07 | 0.17 |
| 11q#145982_145992 | 11 | 76485299-76566536 | 81238   | CAPN5, MYO7A                                     |  | 0.357077272 | 0.119063003 | 0.07 | 0.17 |
| 11q#145915_145920 | 11 | 75813321-75858688 | 45368   | C11orf30                                         |  | 0.357077272 | 0.119063003 | 0.07 | 0.17 |
| 8q#111211_111229  | 8  | 49554940-49774065 | 219126  | AK092055, FLJ46365                               |  | 0.357077272 | 0.119063003 | 0.07 | 0.17 |
| 11q#145378_145381 | 11 | 70896315-70926016 | 29702   | KRTAP5-8                                         |  | 0.256169021 | 0.119389723 | 0.03 | 0.12 |
| 11q#145802_145807 | 11 | 74812434-74851525 | 39092   | FLJ33790, X61598, GPPD5                          |  | 0.256169021 | 0.119389723 | 0.03 | 0.12 |
| 8p#110989_110994  | 8  | 42552555-42663066 | 110512  |                                                  |  | 0.256169021 | 0.119389723 | 0.03 | 0.12 |
| 11q#145783_145790 | 11 | 74714333-74737763 | 23431   | ARRB1                                            |  | 0.256169021 | 0.119389723 | 0.03 | 0.12 |
| 11q#145793_145801 | 11 | 74753980-74807375 | 53396   | X61598, RPS3                                     |  | 0.256169021 | 0.119389723 | 0.03 | 0.12 |
| 17q#198503_198512 | 17 | 56433141-56515261 | 82121   | BCAS3                                            |  | 0.256169021 | 0.119389723 | 0.03 | 0.12 |
| 8p#110995_111010  | 8  | 42671789-42785257 | 113469  | CHRN3, X67513, CHRNA6                            |  | 0.256169021 | 0.119389723 | 0.03 | 0.12 |
| 17q#198358_198359 | 17 | 55045844-55053609 | 7766    | GLTC                                             |  | 0.256169021 | 0.119389723 | 0.03 | 0.12 |
| 11q#145808_145821 | 11 | 74863075-74970226 | 107152  | GPPD5, X61598, SERPINH1                          |  | 0.256169021 | 0.119389723 | 0.03 | 0.12 |
| 11q#145823_145844 | 11 | 74980612-75135039 | 154428  | MAP6, MOGAT2                                     |  | 0.256169021 | 0.119389723 | 0.03 | 0.12 |
| 17q#198488_198502 | 17 | 56278487-56422793 | 144307  | BCAS3                                            |  | 0.256169021 | 0.119389723 | 0.03 | 0.12 |
| 17q#198513_198514 | 17 | 56522082-56533410 | 11329   | BCAS3                                            |  | 0.256169021 | 0.119389723 | 0.03 | 0.12 |
| 17q#199125_199128 | 17 | 62922435-62953823 | 31389   | PITPNC1                                          |  | 0.256169021 | 0.119389723 | 0.03 | 0.12 |
| 11q#145845_145851 | 11 | 75146464-75190202 | 43739   | BC039351, DGAT2                                  |  | 0.256169021 | 0.119389723 | 0.03 | 0.12 |
| 11q#145856_145861 | 11 | 75232076-75277615 | 45540   | UVRAG                                            |  | 0.256169021 | 0.119389723 | 0.03 | 0.12 |
| 11q#145862_145864 | 11 | 75284097-75303183 | 19087   | UVRAG                                            |  | 0.256169021 | 0.119389723 | 0.03 | 0.12 |
| 11q#145791_145792 | 11 | 74742410-74748665 | 6256    |                                                  |  | 0.256169021 | 0.119389723 | 0.03 | 0.12 |
| 17q#199129_199145 | 17 | 62968913-63119183 | 150271  | PITPNC1                                          |  | 0.256169021 | 0.119389723 | 0.03 | 0.12 |
| 11q#145882_145883 | 11 | 75472932-75486607 | 13676   | UVRAG                                            |  | 0.256169021 | 0.119389723 | 0.03 | 0.12 |
| 11q#145878_145881 | 11 | 75437149-75466964 | 29816   | UVRAG                                            |  | 0.256169021 | 0.119389723 | 0.03 | 0.12 |
| 11q#145884_145888 | 11 | 75496709-75536446 | 39738   | UVRAG                                            |  | 0.256169021 | 0.119389723 | 0.03 | 0.12 |
| 11q#145889_145893 | 11 | 75547939-75582688 | 34750   | WNT11                                            |  | 0.256169021 | 0.119389723 | 0.03 | 0.12 |
| 11q#146159_146169 | 11 | 78137964-78240296 | 102333  | AB037723                                         |  | 0.256169021 | 0.119389723 | 0.03 | 0.12 |
| 11q#146186_146189 | 11 | 78411830-78431953 | 20124   | AF009227                                         |  | 0.256169021 | 0.119389723 | 0.03 | 0.12 |

|                   |    |                     |        |                                                 |             |             |      |      |
|-------------------|----|---------------------|--------|-------------------------------------------------|-------------|-------------|------|------|
| 11q#146170_146185 | 11 | 78249277-78400611   | 151335 | AF009227                                        | 0.256169021 | 0.119389723 | 0.03 | 0.12 |
| 11q#146190_146200 | 11 | 78440129-78549012   | 108884 | AF009227                                        | 0.256169021 | 0.119389723 | 0.03 | 0.12 |
| 11q#145187_145188 | 11 | 68913061-68943607   | 30547  |                                                 | 0.431615069 | 0.122174291 | 0.14 | 0.27 |
| 8q#117741_117752  | 8  | 138686235-138905097 | 218863 | AK127771                                        | 0.385787372 | 0.134951498 | 0.08 | 0.20 |
| 11q#145319_145320 | 11 | 70324966-70348666   | 23701  | DQ152234                                        | 0.385787372 | 0.134951498 | 0.08 | 0.20 |
| 11q#145317_145318 | 11 | 70304714-70313682   | 8969   | DQ152234                                        | 0.385787372 | 0.134951498 | 0.08 | 0.20 |
| 8q#112558_112559  | 8  | 68144856-68149271   | 4416   | AM156947                                        | 0.385787372 | 0.134951498 | 0.08 | 0.20 |
| 8q#112550_112557  | 8  | 68092487-68137051   | 44565  | LOC286187, COPS5                                | 0.385787372 | 0.134951498 | 0.08 | 0.20 |
| 8q#112534_112549  | 8  | 67934862-68080032   | 145171 | SGK3, C8orf45, AL83526, LOC286187               | 0.385787372 | 0.134951498 | 0.08 | 0.20 |
| 8q#112530_112533  | 8  | 67903083-67926622   | 23540  | SGK3                                            | 0.385787372 | 0.134951498 | 0.08 | 0.20 |
| 8q#112560_112634  | 8  | 68159060-68829190   | 670131 | CSPP1, AB209324, ARFGEF1, BC030256, CPA6        | 0.385787372 | 0.134951498 | 0.08 | 0.20 |
| 8q#112697_112709  | 8  | 69545824-69639571   | 93748  | C8orf34                                         | 0.385787372 | 0.134951498 | 0.08 | 0.20 |
| 8q#112766_112787  | 8  | 70506883-70673086   | 166204 | SULF1                                           | 0.385787372 | 0.134951498 | 0.08 | 0.20 |
| 8q#112747_112765  | 8  | 70062624-70474461   | 411838 | AK055514, BC039348                              | 0.385787372 | 0.134951498 | 0.08 | 0.20 |
| 8q#112788_112798  | 8  | 70679590-70768243   | 88654  | SULF1, SLC05A1                                  | 0.385787372 | 0.134951498 | 0.08 | 0.20 |
| 8q#112085_112095  | 8  | 62130039-62262289   | 132251 |                                                 | 0.385787372 | 0.134951498 | 0.08 | 0.20 |
| 8q#112070_112084  | 8  | 61898964-62102422   | 203459 | CHD7                                            | 0.385787372 | 0.134951498 | 0.08 | 0.20 |
| 11q#145157_145158 | 11 | 68513562-68520214   | 6653   |                                                 | 0.385787372 | 0.134951498 | 0.08 | 0.20 |
| 8q#111674_111675  | 8  | 56293534-56299596   | 6063   | XKR4                                            | 0.385787372 | 0.134951498 | 0.08 | 0.20 |
| 8q#111662_111673  | 8  | 56179058-56286841   | 107784 | XKR4                                            | 0.385787372 | 0.134951498 | 0.08 | 0.20 |
| 11q#145160_145162 | 11 | 68533317-68555958   | 22642  | MARGPRF, BC039516                               | 0.385787372 | 0.134951498 | 0.08 | 0.20 |
| 15q#177993_177998 | 15 | 19860116-19882770   | 22655  | AY941978                                        | Inf         | 0.141893413 | 0.07 | 0.00 |
| 15q#177990_177991 | 15 | 19819961-19833601   | 13641  | AY941978                                        | Inf         | 0.141893413 | 0.07 | 0.00 |
| 15q#177953_177955 | 15 | 18864582-18884495   | 19914  | LOC283755                                       | Inf         | 0.141893413 | 0.07 | 0.00 |
| 15q#178000_178001 | 15 | 19910867-19927311   | 16445  | AY941978                                        | Inf         | 0.141893413 | 0.07 | 0.00 |
| 15q#177987_177988 | 15 | 19537035-19786714   | 249680 | AB066967, AY941978                              | Inf         | 0.141893413 | 0.07 | 0.00 |
| 15q#177985_177986 | 15 | 19435500-19465418   | 29919  | AB066967                                        | Inf         | 0.141893413 | 0.07 | 0.00 |
| 1q#14138_14173    | 1  | 180515497-180902984 | 387488 | RGL1, GLT25D2, C1orf19                          | Inf         | 0.141893413 | 0.07 | 0.00 |
| 11q#144780_144796 | 11 | 65512162-65583078   | 70917  | 1102, BANF1, CST6, CATSPER1, AK090761, GAL3ST3, | Inf         | 0.141893413 | 0.07 | 0.00 |
| 14q#169705_169708 | 14 | 19402284-19420791   | 18508  | BC020999, OR4K2                                 | Inf         | 0.141893413 | 0.07 | 0.00 |
| 14q#169701_169704 | 14 | 19362145-19397768   | 35624  | BC020999                                        | Inf         | 0.141893413 | 0.07 | 0.00 |
| 14q#169686_169689 | 14 | 18864561-19216417   | 351857 | BC020999                                        | Inf         | 0.141893413 | 0.07 | 0.00 |
| 14q#169709_169712 | 14 | 19433191-19456335   | 23145  | BC020999                                        | Inf         | 0.141893413 | 0.07 | 0.00 |
| 14q#169713_169714 | 14 | 19459171-19462030   | 2860   | OR4K5, BC020999                                 | Inf         | 0.141893413 | 0.07 | 0.00 |
| 14q#169715_169718 | 14 | 19467512-19484072   | 16561  | BC020999, OR4K1                                 | Inf         | 0.141893413 | 0.07 | 0.00 |
| 14q#169680_169685 | 14 | 18149473-18642311   | 492839 | POTE14                                          | Inf         | 0.141893413 | 0.07 | 0.00 |
| 14q#169691_169700 | 14 | 19273289-19350289   | 77001  | BC020999                                        | Inf         | 0.141893413 | 0.07 | 0.00 |
| 8p#110468_110475  | 8  | 36859035-36912314   | 53280  | BC028701, FKSG2                                 | 0.316261426 | 0.154612789 | 0.05 | 0.15 |
| 17q#198376_198404 | 17 | 55197142-55388366   | 191225 | TMEM49, TUBD1, RPS6KB1, LOC51136                | 0.316261426 | 0.154612789 | 0.05 | 0.15 |
| 11q#145899_145905 | 11 | 75609104-75736478   | 127375 |                                                 | 0.316261426 | 0.154612789 | 0.05 | 0.15 |
| 11q#145976_145978 | 11 | 76444567-76462778   | 18212  | CAPN5                                           | 0.316261426 | 0.154612789 | 0.05 | 0.15 |
| 11q#145906_145908 | 11 | 75744308-75755084   | 10777  | PRKRIR                                          | 0.316261426 | 0.154612789 | 0.05 | 0.15 |
| 11q#146204_146209 | 11 | 78598731-78732765   | 134035 | AF009227                                        | 0.316261426 | 0.154612789 | 0.05 | 0.15 |
| 11q#145601_145602 | 11 | 73056101-73063044   | 6944   |                                                 | 0.162293368 | 0.155812198 | 0.02 | 0.10 |
| 11q#145498_145505 | 11 | 72128981-72187554   | 58574  | AB209473, STARD10                               | 0.162293368 | 0.155812198 | 0.02 | 0.10 |
| 11q#145586_145592 | 11 | 72927117-72984404   | 57288  | D87470                                          | 0.162293368 | 0.155812198 | 0.02 | 0.10 |
| 11q#145593_145600 | 11 | 72990527-73051012   | 60486  | PLEKHB1                                         | 0.162293368 | 0.155812198 | 0.02 | 0.10 |
| 11q#145603_145605 | 11 | 73068323-73084752   | 16430  | RAB6A                                           | 0.162293368 | 0.155812198 | 0.02 | 0.10 |
| 11q#145512_145521 | 11 | 72233710-72310640   | 76931  | FCHSD2                                          | 0.162293368 | 0.155812198 | 0.02 | 0.10 |
| 11q#145765_145774 | 11 | 74563431-74656697   | 93267  | SLCO2B1, ARRB1                                  | 0.162293368 | 0.155812198 | 0.02 | 0.10 |
| 11q#145385_145386 | 11 | 70945811-70954964   | 9154   | KRTAP5-10                                       | 0.162293368 | 0.155812198 | 0.02 | 0.10 |
| 11q#145383_145384 | 11 | 70937887-70940843   | 2957   | KRTAP5-9                                        | 0.162293368 | 0.155812198 | 0.02 | 0.10 |
| 11q#145546_145554 | 11 | 72559987-72643043   | 83057  | P2RY2, BX641058                                 | 0.162293368 | 0.155812198 | 0.02 | 0.10 |
| 11q#145583_145585 | 11 | 72906498-72919903   | 13406  | D87470                                          | 0.162293368 | 0.155812198 | 0.02 | 0.10 |
| 11q#145555_145564 | 11 | 72650860-72729878   | 79019  | P2RY6, ARHGEF17                                 | 0.162293368 | 0.155812198 | 0.02 | 0.10 |

|                   |    |                     |        |                                                  |             |             |      |      |
|-------------------|----|---------------------|--------|--------------------------------------------------|-------------|-------------|------|------|
| 17q#198303_198336 | 17 | 54473493-54705077   | 231585 | TRIM37, FAM33A, PRR11, AK001891, C17orf71, GDDP1 | 0.162293368 | 0.155812198 | 0.02 | 0.10 |
| 11q#145536_145545 | 11 | 72444744-72547688   | 102945 | FCHSD2                                           | 0.162293368 | 0.155812198 | 0.02 | 0.10 |
| 8p#111042_111051  | 8  | 43069739-43143851   | 74113  | FLJ23356, AF338195                               | 0.162293368 | 0.155812198 | 0.02 | 0.10 |
| 17q#198292_198302 | 17 | 54367713-54464198   | 96486  | PPM1E, TRIM37                                    | 0.162293368 | 0.155812198 | 0.02 | 0.10 |
| 11q#145565_145566 | 11 | 72744231-72757753   | 13523  | ARHGEF17                                         | 0.162293368 | 0.155812198 | 0.02 | 0.10 |
| 11q#145567_145581 | 11 | 72766437-72885763   | 119327 | TNFRSF19L, D87470                                | 0.162293368 | 0.155812198 | 0.02 | 0.10 |
| 17q#199185_199193 | 17 | 63719627-63774096   | 54470  | AMZ2, AY358380                                   | 0.162293368 | 0.155812198 | 0.02 | 0.10 |
| 17q#199810_199817 | 17 | 71241737-71283327   | 41591  | ITGB4, GALK1                                     | 0.162293368 | 0.155812198 | 0.02 | 0.10 |
| 20q#216791_216799 | 20 | 50193263-50295580   | 102318 | ZFP64                                            | 0.162293368 | 0.155812198 | 0.02 | 0.10 |
| 8p#111035_111040  | 8  | 43017901-43051302   | 33402  | AF338195, FN1A                                   | 0.162293368 | 0.155812198 | 0.02 | 0.10 |
| 8p#111052_111057  | 8  | 43155815-43202333   | 46519  | CR749838                                         | 0.162293368 | 0.155812198 | 0.02 | 0.10 |
| 17q#199194_199200 | 17 | 63780439-63829913   | 49475  | SLC16A6, AY358380, ARSG                          | 0.162293368 | 0.155812198 | 0.02 | 0.10 |
| 17q#199229_199235 | 17 | 64109807-64205908   | 96102  | AL117652                                         | 0.162293368 | 0.155812198 | 0.02 | 0.10 |
| 8p#111060_111069  | 8  | 43254441-43353273   | 98833  | POTE8                                            | 0.162293368 | 0.155812198 | 0.02 | 0.10 |
| 8p#111058_111059  | 8  | 43229651-43245732   | 16082  |                                                  | 0.162293368 | 0.155812198 | 0.02 | 0.10 |
| 20q#216825_216835 | 20 | 50962989-51085814   | 122826 | TSHZ2                                            | 0.162293368 | 0.155812198 | 0.02 | 0.10 |
| 20q#216800_216803 | 20 | 50316928-50409506   | 92579  |                                                  | 0.162293368 | 0.155812198 | 0.02 | 0.10 |
| 8p#110435_110446  | 8  | 36213800-36448955   | 235156 |                                                  | 0.162293368 | 0.155812198 | 0.02 | 0.10 |
| 17q#199997_2e+05  | 17 | 72885023-72909755   | 24733  | Sep-09                                           | 0.162293368 | 0.155812198 | 0.02 | 0.10 |
| 17q#199992_199996 | 17 | 72827808-72879595   | 51788  | Sep-09                                           | 0.162293368 | 0.155812198 | 0.02 | 0.10 |
| 11q#145065_145073 | 11 | 67680190-67777143   | 96954  | SUV420H1                                         | 0.162293368 | 0.155812198 | 0.02 | 0.10 |
| 11q#145063_145064 | 11 | 67658535-67668668   | 10134  |                                                  | 0.162293368 | 0.155812198 | 0.02 | 0.10 |
| 11q#145041_145042 | 11 | 67399793-67414817   | 15025  | AK091996                                         | 0.162293368 | 0.155812198 | 0.02 | 0.10 |
| 11q#145074_145079 | 11 | 67786891-67819156   | 32266  | C11orf24                                         | 0.162293368 | 0.155812198 | 0.02 | 0.10 |
| 11q#145087_145092 | 11 | 67903640-67933531   | 29892  | LRP5                                             | 0.162293368 | 0.155812198 | 0.02 | 0.10 |
| 11q#145080_145086 | 11 | 67826000-67890010   | 64011  | LRP5                                             | 0.162293368 | 0.155812198 | 0.02 | 0.10 |
| 11q#145093_145103 | 11 | 67941109-68028927   | 87819  | LRP5, SAPS3                                      | 0.162293368 | 0.155812198 | 0.02 | 0.10 |
| 11q#146235_146238 | 11 | 79702101-79810665   | 108565 |                                                  | 0.162293368 | 0.155812198 | 0.02 | 0.10 |
| 11q#146233_146234 | 11 | 79627135-79670419   | 43285  |                                                  | 0.162293368 | 0.155812198 | 0.02 | 0.10 |
| 11q#146468_146469 | 11 | 83474457-83490171   | 15715  | DLG2                                             | 0.162293368 | 0.155812198 | 0.02 | 0.10 |
| 17q#199402_199404 | 17 | 67056332-67099873   | 43542  |                                                  | 0           | 0.165656566 | 0.00 | 0.05 |
| 17q#199389_199391 | 17 | 66634964-66662657   | 27694  | BC039327                                         | 0           | 0.165656566 | 0.00 | 0.05 |
| 17q#199382_199384 | 17 | 66421144-66477362   | 56219  |                                                  | 0           | 0.165656566 | 0.00 | 0.05 |
| 17q#199385_199388 | 17 | 66493468-66619160   | 125693 | BC039327                                         | 0           | 0.165656566 | 0.00 | 0.05 |
| 11q#145633_145637 | 11 | 73323918-73358348   | 34431  | DNAJB13                                          | 0           | 0.165656566 | 0.00 | 0.05 |
| 11q#145716_145717 | 11 | 74070265-74080363   | 10099  |                                                  | 0           | 0.165656566 | 0.00 | 0.05 |
| 11q#145692_145715 | 11 | 73824406-74060682   | 236277 | KCNE3, POLD3                                     | 0           | 0.165656566 | 0.00 | 0.05 |
| 11q#145679_145683 | 11 | 73687771-73731321   | 43551  | P4HA3, BC039366, PGM2L1                          | 0           | 0.165656566 | 0.00 | 0.05 |
| 7q#103985_104056  | 7  | 122065264-122917363 | 852100 | C13A1, BC036121, FLJ35834, CR933664, NDUFA5, AS  | 0           | 0.165656566 | 0.00 | 0.05 |
| 11q#145674_145677 | 11 | 73642970-73667847   | 24878  | PPME1, P4HA3                                     | 0           | 0.165656566 | 0.00 | 0.05 |
| 11q#145669_145673 | 11 | 73611054-73635809   | 24756  | PPME1                                            | 0           | 0.165656566 | 0.00 | 0.05 |
| 11q#145690_145691 | 11 | 73803134-73817344   | 14211  |                                                  | 0           | 0.165656566 | 0.00 | 0.05 |
| 11q#145684_145687 | 11 | 73740065-73769592   | 29528  | PGM2L1                                           | 0           | 0.165656566 | 0.00 | 0.05 |
| 20q#216959_216961 | 20 | 52550079-52577183   | 27105  | DOK5                                             | 0           | 0.165656566 | 0.00 | 0.05 |
| 11q#145718_145720 | 11 | 74087184-74109385   | 22202  | CHRD2                                            | 0           | 0.165656566 | 0.00 | 0.05 |
| 18q#205060_205110 | 18 | 56967277-57840691   | 873415 | CDH20, AK094366, AK054836, AK096495, RNF152      | 0           | 0.165656566 | 0.00 | 0.05 |
| 18q#205126_205140 | 18 | 57993059-58109797   | 116739 | PIGN, AK091160, KIAA1468                         | 0           | 0.165656566 | 0.00 | 0.05 |
| 17q#200087_200100 | 17 | 73905851-73993807   | 87957  | PGS1, DNAH17, BC034158                           | 0           | 0.165656566 | 0.00 | 0.05 |
| 17q#199935_199964 | 17 | 72121536-72393836   | 272301 | MXRA7, AB011157, PTDSR, CR599912, SFRS2, ET, AK0 | 0           | 0.165656566 | 0.00 | 0.05 |
| 17q#200102_200104 | 17 | 74023782-74051461   | 27680  | BC034158, DNAHL1                                 | 0           | 0.165656566 | 0.00 | 0.05 |
| 11q#145688_145689 | 11 | 73782850-73789431   | 6582   | PGM2L1                                           | 0           | 0.165656566 | 0.00 | 0.05 |
| 8p#110326_110327  | 8  | 34299546-34312094   | 12549  |                                                  | 0           | 0.165656566 | 0.00 | 0.05 |
| 8p#110194_110218  | 8  | 32471583-32690233   | 218651 | NRG1                                             | 0           | 0.165656566 | 0.00 | 0.05 |
| 8p#110233_110243  | 8  | 32928099-33103391   | 175293 | BC034319                                         | 0           | 0.165656566 | 0.00 | 0.05 |
| 18q#205313_205360 | 18 | 59753335-60317878   | 564544 | SERPINB10, SERPINB8, C18orf20, BC036306          | 0           | 0.165656566 | 0.00 | 0.05 |

|                   |    |                     |         |                                                    |   |             |      |      |
|-------------------|----|---------------------|---------|----------------------------------------------------|---|-------------|------|------|
| 17q#199911_199934 | 17 | 71971517-72113347   | 141831  | 92430, AANAT, RHDF2, CYGB, AK125617, ST6GALN       | 0 | 0.165656566 | 0.00 | 0.05 |
| 6q#90988_91033    | 6  | 131958837-132430553 | 471717  | CRSP3, ENPP3, ENPP1, CTGF, AY927639                | 0 | 0.165656566 | 0.00 | 0.05 |
| 14q#172861_172896 | 14 | 55460670-55888987   | 428318  | PEL12                                              | 0 | 0.165656566 | 0.00 | 0.05 |
| 14q#172582_172603 | 14 | 52571960-52788270   | 216311  | DDHD1, AK096400                                    | 0 | 0.165656566 | 0.00 | 0.05 |
| 8p#110167_110178  | 8  | 32240870-32340225   | 99356   | NRG1                                               | 0 | 0.165656566 | 0.00 | 0.05 |
| 18q#205246_205300 | 18 | 59218766-59648333   | 429568  | RPINB12, SERPINB13, SERPINB4, U19557, SERPINB3,    | 0 | 0.165656566 | 0.00 | 0.05 |
| 18q#204907_205014 | 18 | 55086713-56065523   | 978811  | X, BC065562, CPLX4, LMAN1, CCBE1, BC019072, PMA    | 0 | 0.165656566 | 0.00 | 0.05 |
| 18q#205194_205210 | 18 | 58689055-58849292   | 160238  | PHLPP                                              | 0 | 0.165656566 | 0.00 | 0.05 |
| 8p#110302_110306  | 8  | 33834120-33921065   | 86946   |                                                    | 0 | 0.165656566 | 0.00 | 0.05 |
| 8p#110244_110245  | 8  | 33148505-33181859   | 33355   |                                                    | 0 | 0.165656566 | 0.00 | 0.05 |
| 8p#110309_110311  | 8  | 33964205-33992248   | 28044   |                                                    | 0 | 0.165656566 | 0.00 | 0.05 |
| 18q#205015_205054 | 18 | 56096496-56733145   | 636650  | MC4R                                               | 0 | 0.165656566 | 0.00 | 0.05 |
| 18q#205211_205245 | 18 | 58873708-59209105   | 335398  | BCL2, FVT1, VPS4B                                  | 0 | 0.165656566 | 0.00 | 0.05 |
| 18q#205301_205312 | 18 | 59664687-59746080   | 81394   | SERPINB2, SERPINB10                                | 0 | 0.165656566 | 0.00 | 0.05 |
| 8p#110299_110301  | 8  | 33746859-33806013   | 59155   |                                                    | 0 | 0.165656566 | 0.00 | 0.05 |
| 8p#110307_110308  | 8  | 33936298-33949618   | 13321   |                                                    | 0 | 0.165656566 | 0.00 | 0.05 |
| 18q#205055_205059 | 18 | 56783312-56910827   | 127516  |                                                    | 0 | 0.165656566 | 0.00 | 0.05 |
| 20q#217508_217510 | 20 | 59721605-59737252   | 15648   | CDH4                                               | 0 | 0.165656566 | 0.00 | 0.05 |
| 8p#110334_110346  | 8  | 34493633-34715128   | 221496  |                                                    | 0 | 0.165656566 | 0.00 | 0.05 |
| 18q#205373_205377 | 18 | 60627321-60769213   | 141893  |                                                    | 0 | 0.165656566 | 0.00 | 0.05 |
| 18q#205361_205372 | 18 | 60343270-60599828   | 256559  |                                                    | 0 | 0.165656566 | 0.00 | 0.05 |
| 18q#205378_205431 | 18 | 60825367-62102784   | 1277418 | CDH7                                               | 0 | 0.165656566 | 0.00 | 0.05 |
| 6q#86556_86563    | 6  | 68602261-68795899   | 193639  |                                                    | 0 | 0.165656566 | 0.00 | 0.05 |
| 6q#86551_86554    | 6  | 68383776-68518420   | 134645  |                                                    | 0 | 0.165656566 | 0.00 | 0.05 |
| 6q#92556_92565    | 6  | 151447006-151508877 | 61872   | MTHFD1L                                            | 0 | 0.165656566 | 0.00 | 0.05 |
| 14q#172897_172963 | 14 | 55915554-56787250   | 871697  | BC037850, C14orf101, OTX2, BC041486, EXOC5         | 0 | 0.165656566 | 0.00 | 0.05 |
| 8p#110390_110400  | 8  | 35536715-35622799   | 86085   | UNC5D                                              | 0 | 0.165656566 | 0.00 | 0.05 |
| 8p#110407_110418  | 8  | 35694285-35817762   | 123478  | UNC5D                                              | 0 | 0.165656566 | 0.00 | 0.05 |
| 8p#110388_110389  | 8  | 35520381-35526361   | 5981    | AY358147, UNC5D                                    | 0 | 0.165656566 | 0.00 | 0.05 |
| 8p#110401_110406  | 8  | 35632573-35676199   | 43627   | UNC5D                                              | 0 | 0.165656566 | 0.00 | 0.05 |
| 8p#110419_110426  | 8  | 35838871-35980618   | 141748  |                                                    | 0 | 0.165656566 | 0.00 | 0.05 |
| 8p#110356_110366  | 8  | 34955423-35166896   | 211474  |                                                    | 0 | 0.165656566 | 0.00 | 0.05 |
| 8p#110386_110387  | 8  | 35499408-35515125   | 15718   | AY358147                                           | 0 | 0.165656566 | 0.00 | 0.05 |
| 8p#110368_110369  | 8  | 35227148-35246464   | 19317   | AY358147                                           | 0 | 0.165656566 | 0.00 | 0.05 |
| 14q#172964_172983 | 14 | 56799264-56965699   | 166436  | EXOC5, C14orf108, BX648929, NAT12                  | 0 | 0.165656566 | 0.00 | 0.05 |
| 6q#89656_89659    | 6  | 113987577-114075140 | 87564   |                                                    | 0 | 0.165656566 | 0.00 | 0.05 |
| 6q#89689_89726    | 6  | 114450348-115119838 | 669491  |                                                    | 0 | 0.165656566 | 0.00 | 0.05 |
| 6q#89738_89742    | 6  | 115808160-115960675 | 152516  | BC042098, HS3ST5                                   | 0 | 0.165656566 | 0.00 | 0.05 |
| 6q#88997_89010    | 6  | 105962270-106294551 | 332282  |                                                    | 0 | 0.165656566 | 0.00 | 0.05 |
| 6q#89743_89747    | 6  | 116030317-116201303 | 170987  |                                                    | 0 | 0.165656566 | 0.00 | 0.05 |
| 6q#89804_89821    | 6  | 116804816-116953994 | 149179  | SART2, LOC441168, AK002042, C6orf188               | 0 | 0.165656566 | 0.00 | 0.05 |
| 14q#173046_173050 | 14 | 57576219-57609829   | 33611   | C14orf37                                           | 0 | 0.165656566 | 0.00 | 0.05 |
| 14q#172984_172993 | 14 | 56980833-57044324   | 63492   | C14orf105                                          | 0 | 0.165656566 | 0.00 | 0.05 |
| 14q#173051_173061 | 14 | 57622979-57711240   | 88262   | C14orf37                                           | 0 | 0.165656566 | 0.00 | 0.05 |
| 14q#172994_173021 | 14 | 57056430-57292494   | 236065  |                                                    | 0 | 0.165656566 | 0.00 | 0.05 |
| 6q#86564_86577    | 6  | 68842844-69133108   | 290265  | BC031312                                           | 0 | 0.165656566 | 0.00 | 0.05 |
| 18q#202442_202521 | 18 | 22544280-23552457   | 1008178 | AQP4, C18orf16, CHST9, BC043377, AK127888          | 0 | 0.165656566 | 0.00 | 0.05 |
| 6q#89293_89348    | 6  | 109667383-110089068 | 421686  | 164, PPII6, SMPD2, MICAL1, ZBTB24, FLJ25791, FLJ4, | 0 | 0.165656566 | 0.00 | 0.05 |
| 6q#89130_89154    | 6  | 107887258-108134382 | 247125  | PDSS2, FLJ10159, AK093571                          | 0 | 0.165656566 | 0.00 | 0.05 |
| 6q#90550_90588    | 6  | 126803137-127362368 | 59232   | AL832235, AK127472                                 | 0 | 0.165656566 | 0.00 | 0.05 |
| 6q#90047_90111    | 6  | 119499582-120851930 | 1352349 | BX538186, MAN1A1, AK097101                         | 0 | 0.165656566 | 0.00 | 0.05 |
| 5p#70555_70559    | 5  | 44542173-44675076   | 132904  |                                                    | 0 | 0.165656566 | 0.00 | 0.05 |
| 6q#88889_88920    | 6  | 104155189-104967237 | 812049  |                                                    | 0 | 0.165656566 | 0.00 | 0.05 |
| 6q#89023_89038    | 6  | 106650236-106791323 | 141088  | PRDM1, ATG5                                        | 0 | 0.165656566 | 0.00 | 0.05 |
| 6q#89648_89655    | 6  | 113720536-113957692 | 237157  |                                                    | 0 | 0.165656566 | 0.00 | 0.05 |

|            |        |    |                     |        |                                                  |  |             |             |      |      |
|------------|--------|----|---------------------|--------|--------------------------------------------------|--|-------------|-------------|------|------|
| 6q#88870   | 88880  | 6  | 103401321-103810670 | 409350 |                                                  |  | 0           | 0.165656566 | 0.00 | 0.05 |
| 6q#88921   | 88922  | 6  | 104996149-105056537 | 60389  |                                                  |  | 0           | 0.165656566 | 0.00 | 0.05 |
| 6q#88946   | 88996  | 6  | 105444080-105952440 | 508361 | LIN28B, BVES, AL137368, POPDC3, PREP             |  | 0           | 0.165656566 | 0.00 | 0.05 |
| 6q#89011   | 89022  | 6  | 106320563-106645949 | 325387 | PRDM1                                            |  | 0           | 0.165656566 | 0.00 | 0.05 |
| 18q#202358 | 202440 | 18 | 21837169-22492676   | 655508 | SS18, PSMA8, AY888048, KC1D1                     |  | 0           | 0.165656566 | 0.00 | 0.05 |
| 11q#146271 | 146272 | 11 | 80976809-81018972   | 42164  |                                                  |  | 0           | 0.165656566 | 0.00 | 0.05 |
| 11q#146510 | 146514 | 11 | 83866493-83900896   | 34404  | DLG2                                             |  | 0           | 0.165656566 | 0.00 | 0.05 |
| 11q#146291 | 146294 | 11 | 81469909-81502079   | 32171  | BC041900                                         |  | 0           | 0.165656566 | 0.00 | 0.05 |
| 11q#146295 | 146299 | 11 | 81515157-81564378   | 49222  | BC041900                                         |  | 0           | 0.165656566 | 0.00 | 0.05 |
| 5p#70560   | 70564  | 5  | 44702946-44799315   | 96370  |                                                  |  | 0           | 0.165656566 | 0.00 | 0.05 |
| 6q#89039   | 89054  | 6  | 106802724-106992409 | 189686 | ATG5, AK125137                                   |  | 0           | 0.165656566 | 0.00 | 0.05 |
| 6q#89055   | 89129  | 6  | 107004805-107873237 | 868433 | AIM1, RTN4IP1, QRSL1, AJ420564, AK025967, C6orf2 |  | 0           | 0.165656566 | 0.00 | 0.05 |
| 6q#88923   | 88945  | 6  | 105085620-105423847 | 338228 | HACE1                                            |  | 0           | 0.165656566 | 0.00 | 0.05 |
| 6q#89562   | 89587  | 6  | 112243219-112523927 | 280709 | FYN, WISP3, TUBE1, LOC619208                     |  | 0           | 0.165656566 | 0.00 | 0.05 |
| 11q#147369 | 147390 | 11 | 94557205-95142024   | 584820 | SESN3, FAM76B                                    |  | 0           | 0.165656566 | 0.00 | 0.05 |
| 11q#146288 | 146290 | 11 | 81410435-81446243   | 35809  | BC041900                                         |  | 0           | 0.165656566 | 0.00 | 0.05 |
| 11q#147391 | 147481 | 11 | 95146810-96005776   | 858967 | CEP57, MTMR2, MAML2, CCDC82, JRKL, BC031306, E   |  | 0           | 0.165656566 | 0.00 | 0.05 |
| 11q#146516 | 146558 | 11 | 83917249-84268654   | 351406 | DLG2                                             |  | 0           | 0.165656566 | 0.00 | 0.05 |
| 6q#90189   | 90220  | 6  | 122622439-122972641 | 350203 | HSF2, SERINC1, PKIB                              |  | 0           | 0.165656566 | 0.00 | 0.05 |
| 11q#146300 | 146302 | 11 | 81579737-81599234   | 19498  | BC041900                                         |  | 0           | 0.165656566 | 0.00 | 0.05 |
| 5p#69917   | 69928  | 5  | 36351212-36654505   | 303294 | SLC1A3                                           |  | 0           | 0.165656566 | 0.00 | 0.05 |
| 5p#69929   | 69932  | 5  | 36663960-36691596   | 27637  | SLC1A3                                           |  | 0           | 0.165656566 | 0.00 | 0.05 |
| 17p#194649 | 194654 | 17 | 17104943-17155849   | 50907  | COPS3, NT5M                                      |  | 0           | 0.165656566 | 0.00 | 0.05 |
| 17p#194632 | 194648 | 17 | 16994115-17099025   | 104911 | M-RIP, AK021594, LOC201164, FLCN, COPS3          |  | 0           | 0.165656566 | 0.00 | 0.05 |
| 17p#194609 | 194631 | 17 | 16752847-16981224   | 228378 | AK024458, TNFRSF13B, M-RIP                       |  | 0           | 0.165656566 | 0.00 | 0.05 |
| 11q#145183 | 145186 | 11 | 68842430-68894968   | 52539  |                                                  |  | 0.489919154 | 0.19241348  | 0.14 | 0.24 |
| 11q#145189 | 145191 | 11 | 68972488-69008917   | 36430  | AK000473                                         |  | 0.49454018  | 0.204748984 | 0.15 | 0.27 |
| 8q#112635  | 112639 | 8  | 68837982-68929534   | 91553  |                                                  |  | 0.453470116 | 0.222439439 | 0.08 | 0.17 |
| 8q#112690  | 112696 | 8  | 69480728-69533450   | 52723  | BC041961, C8orf34                                |  | 0.453470116 | 0.222439439 | 0.08 | 0.17 |
| 8q#111856  | 111886 | 8  | 58815947-59238758   | 422812 | T1560, C8orf72                                   |  | 0.453470116 | 0.222439439 | 0.08 | 0.17 |
| 8q#111938  | 111978 | 8  | 59893563-60222591   | 329029 | TOX                                              |  | 0.453470116 | 0.222439439 | 0.08 | 0.17 |
| 8q#112002  | 112007 | 8  | 60971208-61134103   | 162896 |                                                  |  | 0.453470116 | 0.222439439 | 0.08 | 0.17 |
| 8q#112028  | 112051 | 8  | 61447156-61734294   | 287139 | RAB2, CR605346                                   |  | 0.453470116 | 0.222439439 | 0.08 | 0.17 |
| 8q#112247  | 112303 | 8  | 63986091-64717079   | 730989 | FAM77D, GGH, TTPA, YTHDF3, AK172857, AK093370    |  | 0.453470116 | 0.222439439 | 0.08 | 0.17 |
| 8q#112052  | 112069 | 8  | 61745496-61891565   | 146070 | CHD7                                             |  | 0.453470116 | 0.222439439 | 0.08 | 0.17 |
| 8q#112160  | 112246 | 8  | 63098816-63979627   | 880812 | FAM77D                                           |  | 0.453470116 | 0.222439439 | 0.08 | 0.17 |
| 8q#111849  | 111855 | 8  | 58651500-58794636   | 143137 |                                                  |  | 0.453470116 | 0.222439439 | 0.08 | 0.17 |
| 8q#111887  | 111890 | 8  | 59246576-59333344   | 86769  | BC032030                                         |  | 0.453470116 | 0.222439439 | 0.08 | 0.17 |
| 8q#111277  | 111282 | 8  | 50798054-50871732   | 73679  |                                                  |  | 0.453470116 | 0.222439439 | 0.08 | 0.17 |
| 8q#111270  | 111276 | 8  | 50578403-50776429   | 198027 |                                                  |  | 0.453470116 | 0.222439439 | 0.08 | 0.17 |
| 8q#111643  | 111659 | 8  | 55736642-56132692   | 396051 | AK098176                                         |  | 0.453470116 | 0.222439439 | 0.08 | 0.17 |
| 8q#111831  | 111848 | 8  | 58268169-58630484   | 362316 | CR749704, AL080200, BC039330                     |  | 0.453470116 | 0.222439439 | 0.08 | 0.17 |
| 8q#111636  | 111642 | 8  | 55683873-55729638   | 45766  | AK098176, RP1                                    |  | 0.453470116 | 0.222439439 | 0.08 | 0.17 |
| 8q#111283  | 111293 | 8  | 50929121-51045294   | 116174 | SNTG1                                            |  | 0.453470116 | 0.222439439 | 0.08 | 0.17 |
| 8q#111324  | 111341 | 8  | 51311239-51484953   | 173715 | SNTG1                                            |  | 0.453470116 | 0.222439439 | 0.08 | 0.17 |
| 8q#111294  | 111297 | 8  | 51056175-51084619   | 28445  | SNTG1                                            |  | 0.453470116 | 0.222439439 | 0.08 | 0.17 |
| 8q#111660  | 111661 | 8  | 56153684-56166255   | 12572  |                                                  |  | 0.453470116 | 0.222439439 | 0.08 | 0.17 |
| 8q#111515  | 111555 | 8  | 53971447-54620672   | 649226 | BC033145, OPRK1                                  |  | 0.453470116 | 0.222439439 | 0.08 | 0.17 |
| 11q#145163 | 145164 | 11 | 68568578-68575349   | 6772   | TPCN2                                            |  | 0.453470116 | 0.222439439 | 0.08 | 0.17 |
| 11q#145775 | 145777 | 11 | 74664596-74681977   | 17382  | ARRB1                                            |  | 0.328304985 | 0.2240181   | 0.03 | 0.10 |
| 11q#145778 | 145782 | 11 | 74687951-74709469   | 21519  | ARRB1                                            |  | 0.328304985 | 0.2240181   | 0.03 | 0.10 |
| 17q#198337 | 198354 | 17 | 54717870-54991615   | 273746 | YPEL2                                            |  | 0.328304985 | 0.2240181   | 0.03 | 0.10 |
| 17q#199097 | 199114 | 17 | 62637579-62820126   | 182548 | HELZ, PSMD12, PITPNC1                            |  | 0.328304985 | 0.2240181   | 0.03 | 0.10 |
| 17q#198861 | 198869 | 17 | 59947990-60025359   | 77370  | CCDC45, SMURF2                                   |  | 0.328304985 | 0.2240181   | 0.03 | 0.10 |
| 17q#198515 | 198533 | 17 | 56550904-56697967   | 147064 | BCAS3                                            |  | 0.328304985 | 0.2240181   | 0.03 | 0.10 |

|                   |    |                     |         |                                                   |             |             |      |      |
|-------------------|----|---------------------|---------|---------------------------------------------------|-------------|-------------|------|------|
| 8p#111012_111018  | 8  | 42809641-42849186   | 39546   | THAP1, BC032393, RNF170                           | 0.328304985 | 0.2240181   | 0.03 | 0.10 |
| 8p#111022_111026  | 8  | 42899872-42940819   | 40948   | HOOK3                                             | 0.328304985 | 0.2240181   | 0.03 | 0.10 |
| 8p#111027_111034  | 8  | 42947603-43008531   | 60929   | HOOK3, AF338195                                   | 0.328304985 | 0.2240181   | 0.03 | 0.10 |
| 17q#198356_198357 | 17 | 55018353-55035253   | 16901   | DHX40                                             | 0.328304985 | 0.2240181   | 0.03 | 0.10 |
| 17q#199115_199124 | 17 | 62826330-62909231   | 82902   | PITPNC1                                           | 0.328304985 | 0.2240181   | 0.03 | 0.10 |
| 17q#199765_199809 | 17 | 70874675-71233434   | 358760  | 95, CASKIN2, TSEN54, LGLL2, AF418286, RECQL5, SA  | 0.328304985 | 0.2240181   | 0.03 | 0.10 |
| 17q#199980_199982 | 17 | 72684954-72708727   | 23774   | SEC14L1                                           | 0.328304985 | 0.2240181   | 0.03 | 0.10 |
| 11q#144999_145005 | 11 | 66985541-67015870   | 30330   | TMEM134, AIP, PITPNM1                             | 0.328304985 | 0.2240181   | 0.03 | 0.10 |
| 17q#199984_199986 | 17 | 72734511-72756314   | 21804   |                                                   | 0.328304985 | 0.2240181   | 0.03 | 0.10 |
| 17q#199987_199988 | 17 | 72770159-72788231   | 18073   | AF189712                                          | 0.328304985 | 0.2240181   | 0.03 | 0.10 |
| 17q#199989_199991 | 17 | 72799476-72815416   | 15941   | AF189712                                          | 0.328304985 | 0.2240181   | 0.03 | 0.10 |
| 11q#145034_145038 | 11 | 67199932-67267842   | 67911   | ALDH3B2, BX647252                                 | 0.328304985 | 0.2240181   | 0.03 | 0.10 |
| 11q#145039_145040 | 11 | 67316044-67330978   | 14935   | CR602694                                          | 0.328304985 | 0.2240181   | 0.03 | 0.10 |
| 11q#145109_145113 | 11 | 68093207-68125955   | 32749   | SAPS3                                             | 0.328304985 | 0.2240181   | 0.03 | 0.10 |
| 11q#145104_145108 | 11 | 68043550-68078233   | 34684   | SAPS3                                             | 0.328304985 | 0.2240181   | 0.03 | 0.10 |
| 11q#146156_146158 | 11 | 78109852-78127207   | 17356   | AB037723                                          | 0.328304985 | 0.2240181   | 0.03 | 0.10 |
| 11q#146224_146227 | 11 | 79297187-79424735   | 127549  |                                                   | 0.328304985 | 0.2240181   | 0.03 | 0.10 |
| 11q#146230_146232 | 11 | 79528774-79590983   | 62210   |                                                   | 0.328304985 | 0.2240181   | 0.03 | 0.10 |
| 11q#146228_146229 | 11 | 79470314-79496288   | 25975   |                                                   | 0.328304985 | 0.2240181   | 0.03 | 0.10 |
| 1q#15563_15653    | 1  | 200792135-201645004 | 852870  | DLT1A, PLEKHA6, PPP1R15B, PIK3C2B, MDM4, CR749    | 0.328304985 | 0.2240181   | 0.03 | 0.10 |
| 1q#15654_15760    | 1  | 201654529-202485667 | 831139  | 748, AK090497, LEMD1, AK026628, AK095633, PCTK3   | 0.328304985 | 0.2240181   | 0.03 | 0.10 |
| 1q#15761_15800    | 1  | 202489972-202874349 | 384378  | SLC41A1, FLJ32569, SLC26A9, C1orf186, CTSE        | 0.328304985 | 0.2240181   | 0.03 | 0.10 |
| 11q#145312_145313 | 11 | 70230497-70248364   | 17868   | DQ152234                                          | 0.470677477 | 0.243676351 | 0.10 | 0.20 |
| 11q#145315_145316 | 11 | 70278677-70287720   | 9044    | DQ152234                                          | 0.470677477 | 0.243676351 | 0.10 | 0.20 |
| 16p#186745_186753 | 16 | 5024702-5067292     | 42591   | AK055222, MGC45438, BC031873, ALG1                | Inf         | 0.266969697 | 0.05 | 0.00 |
| 15q#178012_178013 | 15 | 20060061-20079994   | 19934   |                                                   | Inf         | 0.266969697 | 0.05 | 0.00 |
| 16p#186718_186744 | 16 | 4812901-5020511     | 207611  | N-PAC, UBN1, PPL, AB007880, NAGPA                 | Inf         | 0.266969697 | 0.05 | 0.00 |
| 16p#186528_186569 | 16 | 3338698-3646301     | 307604  | 4, ZNF597, AL833594, FLJ14154, CLUAP1, NOD3, BTB4 | Inf         | 0.266969697 | 0.05 | 0.00 |
| 16p#186601_186619 | 16 | 3911187-4074810     | 163624  | ADCY9                                             | Inf         | 0.266969697 | 0.05 | 0.00 |
| 16p#186570_186600 | 16 | 3651283-3903139     | 251857  | TRAP1, CREBBP                                     | Inf         | 0.266969697 | 0.05 | 0.00 |
| 16p#186754_186769 | 16 | 5132553-5422466     | 289914  | BC108660                                          | Inf         | 0.266969697 | 0.05 | 0.00 |
| 16p#186770_186784 | 16 | 5466877-5771851     | 304975  | BC108660                                          | Inf         | 0.266969697 | 0.05 | 0.00 |
| 15q#178008_178009 | 15 | 19982333-19988363   | 6031    |                                                   | Inf         | 0.266969697 | 0.05 | 0.00 |
| 16p#186785_186788 | 16 | 5791437-5856947     | 65511   |                                                   | Inf         | 0.266969697 | 0.05 | 0.00 |
| 16p#187288_187292 | 16 | 11574595-11627481   | 52887   | LITAF                                             | Inf         | 0.266969697 | 0.05 | 0.00 |
| 16p#187330_187336 | 16 | 11979550-12030609   | 51060   | RUNDC2A                                           | Inf         | 0.266969697 | 0.05 | 0.00 |
| 1q#14600_14608    | 1  | 187958899-188274684 | 315786  |                                                   | Inf         | 0.266969697 | 0.05 | 0.00 |
| 15q#178003_178004 | 15 | 19943194-19952254   | 9061    | AY941978                                          | Inf         | 0.266969697 | 0.05 | 0.00 |
| 16p#186938_186988 | 16 | 7235861-7688734     | 452874  | A2BP1                                             | Inf         | 0.266969697 | 0.05 | 0.00 |
| 16p#186989_187005 | 16 | 7700974-8231284     | 530311  | A2BP1                                             | Inf         | 0.266969697 | 0.05 | 0.00 |
| 16p#187048_187052 | 16 | 8847684-8870903     | 23220   | PMM2, CARHSP1, BC108283                           | Inf         | 0.266969697 | 0.05 | 0.00 |
| 16p#187337_187440 | 16 | 12051520-13407716   | 1356197 | RUNDC2A, AK074072, FLJ11151, CR627300             | Inf         | 0.266969697 | 0.05 | 0.00 |
| 16p#186794_186865 | 16 | 5957777-6581837     | 624061  | A2BP1                                             | Inf         | 0.266969697 | 0.05 | 0.00 |
| 16p#186790_186793 | 16 | 5901278-5931728     | 30451   |                                                   | Inf         | 0.266969697 | 0.05 | 0.00 |
| 16p#187293_187297 | 16 | 11653077-11678358   | 25282   | SNN                                               | Inf         | 0.266969697 | 0.05 | 0.00 |
| 1q#14461_14474    | 1  | 184780831-185250610 | 469780  |                                                   | Inf         | 0.266969697 | 0.05 | 0.00 |
| 1q#14475_14534    | 1  | 185306100-186832088 | 1525989 | FAM5C                                             | Inf         | 0.266969697 | 0.05 | 0.00 |
| 15q#178005_178007 | 15 | 19963175-19976330   | 13156   | AY941978                                          | Inf         | 0.266969697 | 0.05 | 0.00 |
| 16p#187006_187009 | 16 | 8263539-8334951     | 71413   |                                                   | Inf         | 0.266969697 | 0.05 | 0.00 |
| 16p#187298_187316 | 16 | 11681873-11846489   | 164617  | DC11, AK025430, ZC3H7A, BC046363, CR606007, RSL   | Inf         | 0.266969697 | 0.05 | 0.00 |
| 16p#187013_187047 | 16 | 8440386-8833406     | 393021  | C16orf68, AK092846, L32961, ABAT, C16orf51, PMM2  | Inf         | 0.266969697 | 0.05 | 0.00 |
| 16p#186315_186334 | 16 | 1942266-2021477     | 79212   | RPS2, RNF151, TBL3, BC033227, GFER, SYNGR3, ZNF   | Inf         | 0.266969697 | 0.05 | 0.00 |
| 16p#186335_186354 | 16 | 2028439-2168036     | 139598  | SLC9A3R2, NTHL1, TSC2, PKD1, RAB26, TRAF7         | Inf         | 0.266969697 | 0.05 | 0.00 |
| 1q#14020_14129    | 1  | 179342655-180417059 | 1074405 | HX9, C1orf14, LAMC1, LAMC2, NMNAT2, BC032873, SNA | Inf         | 0.266969697 | 0.05 | 0.00 |
| 1q#14130_14137    | 1  | 180431766-180507259 | 75494   | RGL1                                              | Inf         | 0.266969697 | 0.05 | 0.00 |

|                   |        |    |                     |         |  |                                                     |  |  |             |             |      |      |
|-------------------|--------|----|---------------------|---------|--|-----------------------------------------------------|--|--|-------------|-------------|------|------|
| 16p#186243        | 186245 | 16 | 1468171-1475715     | 7545    |  |                                                     |  |  | Inf         | 0.266969697 | 0.05 | 0.00 |
| 16p#186234        | 186242 | 16 | 1409935-1463794     | 53860   |  | LOC283951, CLCN7                                    |  |  | Inf         | 0.266969697 | 0.05 | 0.00 |
| 16p#186226        | 186233 | 16 | 1370178-1406079     | 35902   |  | AF175522, UNKL                                      |  |  | Inf         | 0.266969697 | 0.05 | 0.00 |
| 1q#17151_17216    |        | 1  | 221098708-221883005 | 784298  |  | CNIH3, BC042869, CR936804                           |  |  | Inf         | 0.266969697 | 0.05 | 0.00 |
| 1q#16996_17041    |        | 1  | 217395427-218500357 | 1104931 |  | HLX1, DUSP10                                        |  |  | Inf         | 0.266969697 | 0.05 | 0.00 |
| 1q#17077_17135    |        | 1  | 220228115-220900376 | 672262  |  | 228, AB007952, CR602386, DEGS1, CR623303, BC0080    |  |  | Inf         | 0.266969697 | 0.05 | 0.00 |
| 1q#17429_17461    |        | 1  | 223924596-224219309 | 294714  |  | BC039356, ZNF678, BC007286                          |  |  | Inf         | 0.266969697 | 0.05 | 0.00 |
| 15q#177971_177982 |        | 15 | 19291749-19407644   | 115896  |  | AB066967, POTE15                                    |  |  | Inf         | 0.266969697 | 0.05 | 0.00 |
| 1q#17136_17150    |        | 1  | 220905910-221078810 | 172901  |  | WDR26, CR625980                                     |  |  | Inf         | 0.266969697 | 0.05 | 0.00 |
| 1q#17217_17218    |        | 1  | 221896564-221907939 | 11376   |  | LBR                                                 |  |  | Inf         | 0.266969697 | 0.05 | 0.00 |
| 1q#17407_17428    |        | 1  | 223730742-223917056 | 186315  |  | CDC42BPA, BC039356                                  |  |  | Inf         | 0.266969697 | 0.05 | 0.00 |
| 1q#16972_16995    |        | 1  | 217165775-217381982 | 216208  |  | MARK1, C1orf115, MOSC2, BC010366, MOSC1             |  |  | Inf         | 0.266969697 | 0.05 | 0.00 |
| 1q#17042_17076    |        | 1  | 218525816-220222131 | 1696316 |  | 23608, C1orf80, FLJ43505, DISP1, SUSD4, C1orf65, CA |  |  | Inf         | 0.266969697 | 0.05 | 0.00 |
| 15q#177956_177970 |        | 15 | 19109124-19281933   | 172810  |  | AB066967                                            |  |  | Inf         | 0.266969697 | 0.05 | 0.00 |
| 11q#144806_144807 |        | 11 | 65669021-65684281   | 15261   |  | PACS1                                               |  |  | Inf         | 0.266969697 | 0.05 | 0.00 |
| 11q#144808_144813 |        | 11 | 65700403-65749007   | 48605   |  | PACS1                                               |  |  | Inf         | 0.266969697 | 0.05 | 0.00 |
| 11q#144814_144836 |        | 11 | 65762712-65873560   | 110849  |  | 2, RAB1B, CNIH2, Y1F1A, TMEI151, CD248, RIN1, BRN   |  |  | Inf         | 0.266969697 | 0.05 | 0.00 |
| 15q#177983_177984 |        | 15 | 19418600-19427409   | 8810    |  | AB066967                                            |  |  | Inf         | 0.266969697 | 0.05 | 0.00 |
| 1q#11189_11208    |        | 1  | 150912847-151050497 | 137651  |  | NUP210L, AK128000, TPM3, C1orf43, D63478, UBAP2L    |  |  | Inf         | 0.266969697 | 0.05 | 0.00 |
| 1q#17219_17406    |        | 1  | 221909704-223720801 | 1811098 |  | Y2, C1orf55, H3F3A, ACBD3, BC033346, MIXL1, LIN9, F |  |  | Inf         | 0.266969697 | 0.05 | 0.00 |
| 1q#17576_17590    |        | 1  | 225186793-225465450 | 278658  |  | RHO, AL832503                                       |  |  | Inf         | 0.266969697 | 0.05 | 0.00 |
| 1q#17591_18025    |        | 1  | 225519102-230718004 | 5198903 |  | 458, FAM89A, TRIM67, C1orf131, GNPAT, EXOC8, C1o    |  |  | Inf         | 0.266969697 | 0.05 | 0.00 |
| 1q#19318_19319    |        | 1  | 245009770-245014702 | 4933    |  |                                                     |  |  | Inf         | 0.266969697 | 0.05 | 0.00 |
| 1q#17567_17572    |        | 1  | 225112915-225169622 | 56708   |  |                                                     |  |  | Inf         | 0.266969697 | 0.05 | 0.00 |
| 1q#17573_17574    |        | 1  | 225174410-225179328 | 4919    |  | RHO                                                 |  |  | Inf         | 0.266969697 | 0.05 | 0.00 |
| 1q#19311_19317    |        | 1  | 244936269-244972834 | 36566   |  | OR2T2                                               |  |  | Inf         | 0.266969697 | 0.05 | 0.00 |
| 11q#144798_144805 |        | 11 | 65597430-65658894   | 61465   |  | PACS1                                               |  |  | Inf         | 0.266969697 | 0.05 | 0.00 |
| 1q#11345_11350    |        | 1  | 151998352-152014736 | 16385   |  | BC000349, AK056250                                  |  |  | Inf         | 0.266969697 | 0.05 | 0.00 |
| 1q#18026_18050    |        | 1  | 230730234-230930976 | 200743  |  | SLC35F3, C1orf31, CR602593, TARBP1                  |  |  | Inf         | 0.266969697 | 0.05 | 0.00 |
| 17q#198360_198364 |        | 17 | 55063370-55098988   | 35619   |  | CLTC                                                |  |  | 0.38951731  | 0.266981799 | 0.05 | 0.12 |
| 17q#198373_198375 |        | 17 | 55170958-55188899   | 17942   |  | TMEM49                                              |  |  | 0.38951731  | 0.266981799 | 0.05 | 0.12 |
| 17q#198405_198406 |        | 17 | 55395410-55399182   | 3773    |  | LOC51136, BC029885                                  |  |  | 0.38951731  | 0.266981799 | 0.05 | 0.12 |
| 17q#198430_198455 |        | 17 | 55687335-55926771   | 239437  |  | USP32, C1orf64, AK090983, APPBP2                    |  |  | 0.38951731  | 0.266981799 | 0.05 | 0.12 |
| 17q#198466_198487 |        | 17 | 56056516-56269345   | 212830  |  | PPM1D, BCAS3                                        |  |  | 0.38951731  | 0.266981799 | 0.05 | 0.12 |
| 17q#198407_198416 |        | 17 | 55470922-55561077   | 90156   |  | ABC1, AF086204                                      |  |  | 0.38951731  | 0.266981799 | 0.05 | 0.12 |
| 17q#198456_198465 |        | 17 | 55937097-56044119   | 107023  |  | APPBP2, AK131012, PPM1D                             |  |  | 0.38951731  | 0.266981799 | 0.05 | 0.12 |
| 17q#198417_198429 |        | 17 | 55566824-55677404   | 110581  |  | CA4, USP32                                          |  |  | 0.38951731  | 0.266981799 | 0.05 | 0.12 |
| 11q#144963_144964 |        | 11 | 66798759-66804669   | 5911    |  | ADRBK1                                              |  |  | 0.38951731  | 0.266981799 | 0.05 | 0.12 |
| 11q#145894_145898 |        | 11 | 75587318-75599956   | 12639   |  | WNT11                                               |  |  | 0.38951731  | 0.266981799 | 0.05 | 0.12 |
| 11q#146212_146220 |        | 11 | 78859178-79135023   | 275846  |  |                                                     |  |  | 0.38951731  | 0.266981799 | 0.05 | 0.12 |
| 11q#145177_145182 |        | 11 | 68804860-68834356   | 29497   |  | MYEOV, AK000473                                     |  |  | 0.561086816 | 0.291670815 | 0.14 | 0.22 |
| 11q#145507_145509 |        | 11 | 72201249-72214237   | 12989   |  | ATG16L2                                             |  |  | 0.221667176 | 0.302287168 | 0.02 | 0.07 |
| 11q#145510_145511 |        | 11 | 72218278-72227085   | 8808    |  | ATG16L2, FCHSD2                                     |  |  | 0.221667176 | 0.302287168 | 0.02 | 0.07 |
| 11q#145387_145388 |        | 11 | 70961186-70964483   | 3298    |  |                                                     |  |  | 0.221667176 | 0.302287168 | 0.02 | 0.07 |
| 17q#198573_198584 |        | 17 | 57142673-57248536   | 105864  |  | BRIP1                                               |  |  | 0.221667176 | 0.302287168 | 0.02 | 0.07 |
| 17q#197713_197715 |        | 17 | 46280230-46296315   | 16086   |  | TOB1                                                |  |  | 0.221667176 | 0.302287168 | 0.02 | 0.07 |
| 17q#197716_197717 |        | 17 | 46303822-46308493   | 4672    |  |                                                     |  |  | 0.221667176 | 0.302287168 | 0.02 | 0.07 |
| 17q#198555_198561 |        | 17 | 56893435-56966361   | 72927   |  | TBX4                                                |  |  | 0.221667176 | 0.302287168 | 0.02 | 0.07 |
| 17q#197718_197719 |        | 17 | 46315250-46329740   | 14491   |  |                                                     |  |  | 0.221667176 | 0.302287168 | 0.02 | 0.07 |
| 17q#197579_197583 |        | 17 | 45278938-45318400   | 39463   |  | TAC4                                                |  |  | 0.221667176 | 0.302287168 | 0.02 | 0.07 |
| 17q#197836_197839 |        | 17 | 47703816-47823452   | 119637  |  |                                                     |  |  | 0.221667176 | 0.302287168 | 0.02 | 0.07 |
| 11q#145466_145469 |        | 11 | 71844216-71937634   | 93419   |  |                                                     |  |  | 0.221667176 | 0.302287168 | 0.02 | 0.07 |
| 17q#197584_197610 |        | 17 | 45337121-45564110   | 226990  |  | DLX4, DLX3, AK096761, ITGA3, PDK2, SAMD14           |  |  | 0.221667176 | 0.302287168 | 0.02 | 0.07 |
| 17q#197624_197626 |        | 17 | 45629769-45644247   | 14479   |  | COL1A1                                              |  |  | 0.221667176 | 0.302287168 | 0.02 | 0.07 |
| 17q#197694_197695 |        | 17 | 46137552-46142387   | 4836    |  | ANKRD40                                             |  |  | 0.221667176 | 0.302287168 | 0.02 | 0.07 |



|                   |    |                     |        |                                                   |             |             |      |      |
|-------------------|----|---------------------|--------|---------------------------------------------------|-------------|-------------|------|------|
| 17q#197611_197623 | 17 | 45567673-45624628   | 56956  | PPP1R9B, SGCA, BC033456, Z74615, COL1A1           | 0.221667176 | 0.302287168 | 0.02 | 0.07 |
| 17q#197840_197841 | 17 | 47869349-47884858   | 15510  |                                                   | 0.221667176 | 0.302287168 | 0.02 | 0.07 |
| 17q#198542_198544 | 17 | 56783601-56799591   | 15991  | BCAS3                                             | 0.221667176 | 0.302287168 | 0.02 | 0.07 |
| 17q#198545_198554 | 17 | 56808969-56878984   | 70016  | BCAS3, TBX2                                       | 0.221667176 | 0.302287168 | 0.02 | 0.07 |
| 17q#197702_197711 | 17 | 46196405-46267941   | 71537  | C17orf73, WFIKKN2                                 | 0.221667176 | 0.302287168 | 0.02 | 0.07 |
| 17q#197830_197835 | 17 | 47576950-47664234   | 87285  | CA10                                              | 0.221667176 | 0.302287168 | 0.02 | 0.07 |
| 20q#216745_216748 | 20 | 49615267-49649372   | 34106  | ATP9A                                             | 0.221667176 | 0.302287168 | 0.02 | 0.07 |
| 17q#197696_197699 | 17 | 46148078-46176219   | 28142  | CROP                                              | 0.221667176 | 0.302287168 | 0.02 | 0.07 |
| 17q#199303_199317 | 17 | 64994851-65126348   | 131498 | MAP2K6, BC037328, BC068583                        | 0.221667176 | 0.302287168 | 0.02 | 0.07 |
| 17q#197818_197820 | 17 | 47461114-47480544   | 19431  | CA10                                              | 0.221667176 | 0.302287168 | 0.02 | 0.07 |
| 17q#197682_197693 | 17 | 46043118-46127392   | 84275  | CACNA1G, AK000454, ABCC3, CR627413                | 0.221667176 | 0.302287168 | 0.02 | 0.07 |
| 17q#197821_197829 | 17 | 47494260-47566592   | 72333  | CA10                                              | 0.221667176 | 0.302287168 | 0.02 | 0.07 |
| 17q#199623_199665 | 17 | 69977776-70250203   | 272428 | B, CD300C, AY358148, C17orf77, AK097103, BX648376 | 0.221667176 | 0.302287168 | 0.02 | 0.07 |
| 20q#216749_216790 | 20 | 49657466-50184720   | 527255 | ATP9A, SALL4, AK096285, AK222712, ZFP64           | 0.221667176 | 0.302287168 | 0.02 | 0.07 |
| 17q#198283_198289 | 17 | 54270077-54333338   | 63262  | PPM1E                                             | 0.221667176 | 0.302287168 | 0.02 | 0.07 |
| 17q#199290_199302 | 17 | 64830300-64988656   | 158357 | ABCA5, MAP2K6                                     | 0.221667176 | 0.302287168 | 0.02 | 0.07 |
| 17q#199201_199228 | 17 | 63836252-64100163   | 263912 | ARSG, WPI1, PRKAR1A, CR626462, FAM20A             | 0.221667176 | 0.302287168 | 0.02 | 0.07 |
| 17q#199818_199820 | 17 | 71291475-71303862   | 12388  | AK096931, BC046175, AB051540                      | 0.221667176 | 0.302287168 | 0.02 | 0.07 |
| 17q#197670_197681 | 17 | 45962192-46028255   | 66064  | CBPAP, EPN3, AK125807, SPATA20, BC041476, CACN    | 0.221667176 | 0.302287168 | 0.02 | 0.07 |
| 17q#197659_197669 | 17 | 45899383-45954732   | 55350  | FLJ20920, RSAD1, MYCBPAP                          | 0.221667176 | 0.302287168 | 0.02 | 0.07 |
| 17q#198277_198282 | 17 | 54212062-54264283   | 52222  | PPM1E                                             | 0.221667176 | 0.302287168 | 0.02 | 0.07 |
| 17q#199821_199857 | 17 | 71316393-71540785   | 224393 | 47, AK123944, TRIM65, MRPL38, AK024058, AB058766  | 0.221667176 | 0.302287168 | 0.02 | 0.07 |
| 17q#197648_197658 | 17 | 45827278-45892943   | 65666  | LRRCS9, FLJ20920                                  | 0.221667176 | 0.302287168 | 0.02 | 0.07 |
| 17q#199898_199908 | 17 | 71876932-71935447   | 58516  | SPHK1, BC036820, UBE2O                            | 0.221667176 | 0.302287168 | 0.02 | 0.07 |
| 20q#216804_216824 | 20 | 50437323-50931576   | 494254 | BC045652                                          | 0.221667176 | 0.302287168 | 0.02 | 0.07 |
| 17q#200019_200022 | 17 | 73165986-73261860   | 95875  |                                                   | 0.221667176 | 0.302287168 | 0.02 | 0.07 |
| 8p#110433_110434  | 8  | 36153626-36181038   | 27413  |                                                   | 0.221667176 | 0.302287168 | 0.02 | 0.07 |
| 1q#16454_16492    | 1  | 209960599-210635511 | 674913 | AK092251, U44060, PROX1                           | 0.221667176 | 0.302287168 | 0.02 | 0.07 |
| 11q#146462_146467 | 11 | 83415984-83457659   | 41676  | DLG2                                              | 0.221667176 | 0.302287168 | 0.02 | 0.07 |
| 11q#146443_146461 | 11 | 83241792-83409573   | 167782 | DLG2                                              | 0.221667176 | 0.302287168 | 0.02 | 0.07 |
| 11q#146482_146490 | 11 | 83630296-83694235   | 63940  | DLG2                                              | 0.221667176 | 0.302287168 | 0.02 | 0.07 |
| 8p#110476_110477  | 8  | 36941945-36973352   | 31408  |                                                   | 0.428018853 | 0.309579117 | 0.07 | 0.15 |
| 8q#111093_111133  | 8  | 47993944-48573881   | 579938 | D63480                                            | 0.428018853 | 0.309579117 | 0.07 | 0.15 |
| 8q#111076_111082  | 8  | 47062121-47718913   | 656793 |                                                   | 0.428018853 | 0.309579117 | 0.07 | 0.15 |
| 11q#146075_146077 | 11 | 77391902-77404965   | 13064  | KCTD14                                            | 0.428018853 | 0.309579117 | 0.07 | 0.15 |
| 8q#111087_111092  | 8  | 47857974-47981050   | 123077 | AK097475                                          | 0.428018853 | 0.309579117 | 0.07 | 0.15 |
| 11q#146033_146034 | 11 | 77005356-77013633   | 8278   | CLNS1A                                            | 0.428018853 | 0.309579117 | 0.07 | 0.15 |
| 11q#146049_146058 | 11 | 77135734-77231283   | 95550  | HBXAP, C11orf67                                   | 0.428018853 | 0.309579117 | 0.07 | 0.15 |
| 11q#146059_146064 | 11 | 77236210-77275117   | 38908  | C11orf67, BC016854, INTS4                         | 0.428018853 | 0.309579117 | 0.07 | 0.15 |
| 8q#111264_111267  | 8  | 50369945-50469163   | 99219  |                                                   | 0.428018853 | 0.309579117 | 0.07 | 0.15 |
| 11q#146035_146048 | 11 | 77018418-77129460   | 111043 | CLNS1A, HBXAP                                     | 0.428018853 | 0.309579117 | 0.07 | 0.15 |
| 8q#111251_111263  | 8  | 50106229-50336962   | 230734 | C8orf22                                           | 0.428018853 | 0.309579117 | 0.07 | 0.15 |
| 8q#111382_111383  | 8  | 51919678-51970743   | 51066  |                                                   | 0.428018853 | 0.309579117 | 0.07 | 0.15 |
| 11q#145979_145981 | 11 | 76470060-76479821   | 9762   | CAPN5                                             | 0.428018853 | 0.309579117 | 0.07 | 0.15 |
| 11q#146065_146074 | 11 | 77295422-77379834   | 84413  | INTS4                                             | 0.543551099 | 0.350755085 | 0.08 | 0.15 |
| 8q#111342_111349  | 8  | 51491849-51557693   | 65845  | SNTG1                                             | 0.543551099 | 0.350755085 | 0.08 | 0.15 |
| 8q#111368_111377  | 8  | 51753324-51850433   | 97110  | SNTG1                                             | 0.543551099 | 0.350755085 | 0.08 | 0.15 |
| 8q#111618_111634  | 8  | 55489555-55663906   | 174352 | SOX17, AK098176                                   | 0.543551099 | 0.350755085 | 0.08 | 0.15 |
| 8q#111378_111380  | 8  | 51866050-51878236   | 12187  | SNTG1, AL161971                                   | 0.543551099 | 0.350755085 | 0.08 | 0.15 |
| 8q#111303_111323  | 8  | 51146956-51296042   | 149087 | SNTG1                                             | 0.553252015 | 0.371604285 | 0.10 | 0.17 |
| 8q#111298_111302  | 8  | 51095234-51141003   | 45770  | SNTG1                                             | 0.553252015 | 0.371604285 | 0.10 | 0.17 |
| 11q#145308_145311 | 11 | 70182708-70212681   | 29974  | SHANK2, DQ152234                                  | 0.558651729 | 0.394341348 | 0.12 | 0.20 |
| 1q#19324_19329    | 1  | 245082256-245118297 | 36042  | OR2T10                                            | 3.663701487 | 0.396210049 | 0.08 | 0.02 |
| 17q#198538_198541 | 17 | 56752850-56776618   | 23769  | BCAS3                                             | 0.448156585 | 0.398073598 | 0.03 | 0.07 |
| 17q#198535_198537 | 17 | 56730021-56745295   | 15275  | BCAS3                                             | 0.448156585 | 0.398073598 | 0.03 | 0.07 |

|                   |    |                     |         |                                                  |  |             |             |      |      |
|-------------------|----|---------------------|---------|--------------------------------------------------|--|-------------|-------------|------|------|
| 20q#217439_217448 | 20 | 58971383-59105025   | 133643  |                                                  |  | 0.448156585 | 0.398073598 | 0.03 | 0.07 |
| 17q#199069_199096 | 17 | 62410244-62627770   | 217527  | CACNG4, CACNG1, HELZ                             |  | 0.448156585 | 0.398073598 | 0.03 | 0.07 |
| 17q#198877_198880 | 17 | 60108569-60175042   | 66474   | BC016458                                         |  | 0.448156585 | 0.398073598 | 0.03 | 0.07 |
| 17q#198853_198860 | 17 | 59900205-59940933   | 40729   | POLG2, DDX5, CCDC45                              |  | 0.448156585 | 0.398073598 | 0.03 | 0.07 |
| 17q#198870_198876 | 17 | 60032772-60085406   | 52635   | SMURF2                                           |  | 0.448156585 | 0.398073598 | 0.03 | 0.07 |
| 8p#111019_111020  | 8  | 42866053-42874663   | 8611    | RNF170, HOOK3                                    |  | 0.448156585 | 0.398073598 | 0.03 | 0.07 |
| 17q#199715_199739 | 17 | 70548672-70676285   | 127614  | ATP5H, KCTD2, SLC16A5, ARMC7, NT5C, HN1, SUMO4   |  | 0.448156585 | 0.398073598 | 0.03 | 0.07 |
| 17q#199698_199714 | 17 | 70454103-70546589   | 92487   | OTOP3, C17orf28, CDR2L, ICT1, ATP5H              |  | 0.448156585 | 0.398073598 | 0.03 | 0.07 |
| 17q#199666_199677 | 17 | 70251769-70320225   | 68457   | RAB37, SLC9A3R1, NAT9, TMEM104                   |  | 0.448156585 | 0.398073598 | 0.03 | 0.07 |
| 17q#197812_197817 | 17 | 47403266-47451791   | 48526   | CA10                                             |  | 0.448156585 | 0.398073598 | 0.03 | 0.07 |
| 17q#199056_199068 | 17 | 62264201-62397506   | 133306  | CACNG5, CACNG4                                   |  | 0.448156585 | 0.398073598 | 0.03 | 0.07 |
| 17q#199032_199055 | 17 | 62031227-62252002   | 220776  | PRKCA                                            |  | 0.448156585 | 0.398073598 | 0.03 | 0.07 |
| 17q#199678_199697 | 17 | 70325731-70445859   | 120129  | EM104, GRIN2C, FDXR, FADS6, USH1G, OTOP2, OTO    |  | 0.448156585 | 0.398073598 | 0.03 | 0.07 |
| 17q#199762_199764 | 17 | 70835387-70859750   | 24364   | GRB2                                             |  | 0.448156585 | 0.398073598 | 0.03 | 0.07 |
| 17q#199889_199892 | 17 | 71791958-71818674   | 26717   | QRICH2, PRPSAP1                                  |  | 0.448156585 | 0.398073598 | 0.03 | 0.07 |
| 17q#199969_199979 | 17 | 72440665-72670162   | 229498  | MGAT5B, SEC14L1                                  |  | 0.448156585 | 0.398073598 | 0.03 | 0.07 |
| 17q#199893_199897 | 17 | 71835912-71869539   | 33628   | PRPSAP1                                          |  | 0.448156585 | 0.398073598 | 0.03 | 0.07 |
| 17q#199010_199031 | 17 | 61798874-62021457   | 222584  | PRKCA                                            |  | 0.448156585 | 0.398073598 | 0.03 | 0.07 |
| 17q#195130_195141 | 17 | 23426354-23519834   | 93481   | NLK                                              |  | 0.448156585 | 0.398073598 | 0.03 | 0.07 |
| 17q#200002_200007 | 17 | 72931418-72962800   | 31383   | Sep-09                                           |  | 0.448156585 | 0.398073598 | 0.03 | 0.07 |
| 17q#200008_200018 | 17 | 72968609-73136901   | 168293  | SEPT9, AK027069, BC010635                        |  | 0.448156585 | 0.398073598 | 0.03 | 0.07 |
| 17q#195121_195129 | 17 | 23290659-23413436   | 122778  | BC034720, NLK                                    |  | 0.448156585 | 0.398073598 | 0.03 | 0.07 |
| 11q#145006_145010 | 11 | 67023651-67051091   | 27441   | PITPNM1, CDK2AP2, CABP2                          |  | 0.448156585 | 0.398073598 | 0.03 | 0.07 |
| 11q#144945_144947 | 11 | 66606092-66623319   | 17228   | EFCAB5                                           |  | 0.448156585 | 0.398073598 | 0.03 | 0.07 |
| 17q#195392_195395 | 17 | 25351076-25377408   | 26333   | RHOD                                             |  | 0.448156585 | 0.398073598 | 0.03 | 0.07 |
| 11q#144940_144944 | 11 | 66579177-66600121   | 20945   | SSH2                                             |  | 0.448156585 | 0.398073598 | 0.03 | 0.07 |
| 17q#195356_195380 | 17 | 24999107-25242570   | 243464  | ALDH3B2                                          |  | 0.448156585 | 0.398073598 | 0.03 | 0.07 |
| 11q#145011_145013 | 11 | 67059787-67082203   | 22417   | NDUFV1, AK124982, X15675, TBX10, ACY3, ALDH3B2   |  | 0.448156585 | 0.398073598 | 0.03 | 0.07 |
| 11q#145032_145033 | 11 | 67191388-67194934   | 3547    | CFHR1, CFHR4, CFHR2, CFHR5, F13B, BX648804       |  | 0.448156585 | 0.398073598 | 0.03 | 0.07 |
| 11q#145021_145031 | 11 | 67131604-67187961   | 56358   | AK02969, LOC148696, CD34                         |  | 0.448156585 | 0.398073598 | 0.03 | 0.07 |
| 1q#14883_14913    | 1  | 193532798-193785112 | 252315  | ASPM                                             |  | 0.448156585 | 0.398073598 | 0.03 | 0.07 |
| 1q#15970_15982    | 1  | 204367189-204472972 | 105784  | CR1, BC109190, AY114160, CD46, AK123264          |  | 0.448156585 | 0.398073598 | 0.03 | 0.07 |
| 1q#14914_14920    | 1  | 193785182-193843291 | 58110   | SYT2, AF093822                                   |  | 0.448156585 | 0.398073598 | 0.03 | 0.07 |
| 1q#15944_15969    | 1  | 204128081-204364978 | 236898  | 30A1, CR605189, NEK2, LPGAT1, BC009918, INTS7, D |  | 0.448156585 | 0.398073598 | 0.03 | 0.07 |
| 1q#15983_15987    | 1  | 204486728-204571597 | 84870   | SNFT, AK124596                                   |  | 0.448156585 | 0.398073598 | 0.03 | 0.07 |
| 1q#15402_15407    | 1  | 199386490-199428214 | 41725   | RPS6KC1                                          |  | 0.448156585 | 0.398073598 | 0.03 | 0.07 |
| 1q#16188_16364    | 1  | 207295021-209142435 | 1847415 | JARID1B, AF093822, RAB1F, KLHL12                 |  | 0.448156585 | 0.398073598 | 0.03 | 0.07 |
| 1q#16378_16385    | 1  | 209239553-209289265 | 49713   | CNTNAP2                                          |  | 0.448156585 | 0.398073598 | 0.03 | 0.07 |
| 1q#16420_16440    | 1  | 209579787-209756921 | 177135  | CADPS2                                           |  | 0.448156585 | 0.398073598 | 0.03 | 0.07 |
| 1q#16452_16453    | 1  | 209871089-209911676 | 40588   | WASL, AF149304, HYAL4, SPAM1, L13779             |  | 0.448156585 | 0.398073598 | 0.03 | 0.07 |
| 1q#15408_15434    | 1  | 199430442-199631188 | 200747  | AF279773, G36901, PTN                            |  | 0.448156585 | 0.398073598 | 0.03 | 0.07 |
| 17q#199398_199399 | 17 | 66912694-66940737   | 28044   | MAGI2                                            |  | 0.448156585 | 0.398073598 | 0.03 | 0.07 |
| 17q#199400_199401 | 17 | 66970478-67022021   | 51544   | CNTNAP2                                          |  | 0.448156585 | 0.398073598 | 0.03 | 0.07 |
| 7q#106303_106321  | 7  | 146434932-146578819 | 143888  | CADPS2                                           |  | 0.448156585 | 0.398073598 | 0.03 | 0.07 |
| 7q#103976_103984  | 7  | 121988075-122058089 | 70015   | WASL, AF149304, HYAL4, SPAM1, L13779             |  | 0.448156585 | 0.398073598 | 0.03 | 0.07 |
| 7q#104057_104094  | 7  | 122930682-123361547 | 430866  | AF279773, G36901, PTN                            |  | 0.448156585 | 0.398073598 | 0.03 | 0.07 |
| 7q#99020_99025    | 7  | 62286991-62694059   | 407069  | MAGI2                                            |  | 0.448156585 | 0.398073598 | 0.03 | 0.07 |
| 7q#105263_105278  | 7  | 136191538-136401979 | 210442  | CNTNAP2                                          |  | 0.448156585 | 0.398073598 | 0.03 | 0.07 |
| 7q#106294_106302  | 7  | 146348249-146418735 | 70487   | CHRM2, AF279773                                  |  | 0.448156585 | 0.398073598 | 0.03 | 0.07 |
| 7q#100173_100218  | 7  | 77435117-77806874   | 371758  | MAGI2                                            |  | 0.448156585 | 0.398073598 | 0.03 | 0.07 |
| 7q#106322_106392  | 7  | 146584614-147189186 | 604573  | CNTNAP2                                          |  | 0.448156585 | 0.398073598 | 0.03 | 0.07 |
| 7q#105255_105262  | 7  | 136106953-136174150 | 67198   | CHRM2, AF279773                                  |  | 0.448156585 | 0.398073598 | 0.03 | 0.07 |
| 7q#99018_99019    | 7  | 62272745-62277792   | 5048    | MAGI2                                            |  | 0.448156585 | 0.398073598 | 0.03 | 0.07 |
| 7q#100219_100223  | 7  | 77816994-77845466   | 28473   | MAGI2                                            |  | 0.448156585 | 0.398073598 | 0.03 | 0.07 |
| 7q#100224_100328  | 7  | 77855519-78745781   | 890263  | MAGI2, CR749529                                  |  | 0.448156585 | 0.398073598 | 0.03 | 0.07 |

|                   |    |                     |         |                                                     |   |      |      |      |
|-------------------|----|---------------------|---------|-----------------------------------------------------|---|------|------|------|
| 7q#104232_104261  | 7  | 125724372-126004041 | 279670  | GRM8                                                | 0 | 0.41 | 0.00 | 0.02 |
| 7q#104262_104265  | 7  | 126015597-126038894 | 23298   | GRM8                                                | 0 | 0.41 | 0.00 | 0.02 |
| 20q#216512_216519 | 20 | 47098987-47163407   | 64421   | CSE1L, STAU1                                        | 0 | 0.41 | 0.00 | 0.02 |
| 20q#216023_216037 | 20 | 42390514-42504464   | 113951  | AK027041, R3HDM, HNF4A                              | 0 | 0.41 | 0.00 | 0.02 |
| 17q#197923_197936 | 17 | 50328173-50439859   | 111687  | TOM1L1, COX11, STXBP4                               | 0 | 0.41 | 0.00 | 0.02 |
| 20q#216177_216180 | 20 | 43588657-43607459   | 18803   | WFDC6, SPINLW1                                      | 0 | 0.41 | 0.00 | 0.02 |
| 20q#216962_216973 | 20 | 52585318-52700729   | 115412  | DOK5                                                | 0 | 0.41 | 0.00 | 0.02 |
| 20q#216636_216651 | 20 | 48249501-48416394   | 166894  | CR620996, LOC284751, BC039367                       | 0 | 0.41 | 0.00 | 0.02 |
| 8p#110022_110043  | 8  | 30680346-30829662   | 149317  | GSR, UBXD6, PPP2CB, TEX15                           | 0 | 0.41 | 0.00 | 0.02 |
| 8p#110045_110054  | 8  | 30852365-30999475   | 147111  | PURG                                                | 0 | 0.41 | 0.00 | 0.02 |
| 22q#222105_222107 | 22 | 22672513-22681298   | 8786    |                                                     | 0 | 0.41 | 0.00 | 0.02 |
| 8p#110055_110070  | 8  | 31004316-31109593   | 105278  | PURG, WRN                                           | 0 | 0.41 | 0.00 | 0.02 |
| 22q#222096_222104 | 22 | 22606654-22665976   | 59323   | AK123996, DDT, HS322B1A                             | 0 | 0.41 | 0.00 | 0.02 |
| 8p#110071_110078  | 8  | 31118674-31173415   | 54742   | WRN                                                 | 0 | 0.41 | 0.00 | 0.02 |
| 7q#100409_100421  | 7  | 80032221-80151252   | 119032  | SEMA3C                                              | 0 | 0.41 | 0.00 | 0.02 |
| 18q#205147_205162 | 18 | 58170669-58363063   | 192395  | TNFRSF11A, BC006340, AL832323, ZCCHC2               | 0 | 0.41 | 0.00 | 0.02 |
| 7q#100329_100354  | 7  | 78762654-79427824   | 665171  | GNAI1                                               | 0 | 0.41 | 0.00 | 0.02 |
| 7q#100355_100407  | 7  | 79435245-80016551   | 581307  | GNAI1, AK096858, CD36, SEMA3C                       | 0 | 0.41 | 0.00 | 0.02 |
| 7q#100422_100488  | 7  | 80162478-81288442   | 1125965 | EMA3C, AY927634, AY927633, X16323, HGF, CACNA2I     | 0 | 0.41 | 0.00 | 0.02 |
| 7q#100489_100558  | 7  | 81293497-82173385   | 879889  | CACNA2D1, AB011131                                  | 0 | 0.41 | 0.00 | 0.02 |
| 7q#104223_104231  | 7  | 125619554-125713199 | 93646   | GRM8                                                | 0 | 0.41 | 0.00 | 0.02 |
| 18q#205141_205146 | 18 | 58123648-58163568   | 39921   | KIAA1468, TNFRSF11A                                 | 0 | 0.41 | 0.00 | 0.02 |
| 21q#221145_221209 | 21 | 45883083-46436828   | 553746  | K123852, AK094301, PCBP3, COL6A1, COL6A2, FTCD,     | 0 | 0.41 | 0.00 | 0.02 |
| 21q#221216_221279 | 21 | 46479772-46914745   | 434974  | P, C21orf57, C21orf58, PCNT, AK127572, DIP2A, S100B | 0 | 0.41 | 0.00 | 0.02 |
| 20q#216012_216017 | 20 | 42288577-42341650   | 53074   | GDAP1L1                                             | 0 | 0.41 | 0.00 | 0.02 |
| 20q#216018_216022 | 20 | 42351544-42383722   | 32179   | BC029662, AK027041                                  | 0 | 0.41 | 0.00 | 0.02 |
| 20q#216038_216176 | 20 | 42510864-43580745   | 1069882 | 21304, TOMM34, STK4, KCNS1, WFDC5, WFDC12, PI3,     | 0 | 0.41 | 0.00 | 0.02 |
| 17q#197217_197231 | 17 | 42166852-42281676   | 114825  | NSF, WNT3, BC006271                                 | 0 | 0.41 | 0.00 | 0.02 |
| 20q#216181_216185 | 20 | 43614202-43638166   | 23965   | WFDC8                                               | 0 | 0.41 | 0.00 | 0.02 |
| 20q#216974_216975 | 20 | 52707330-52714694   | 7365    |                                                     | 0 | 0.41 | 0.00 | 0.02 |
| 20q#217029_217036 | 20 | 54231515-54279785   | 48271   | MC3R                                                | 0 | 0.41 | 0.00 | 0.02 |
| 20q#217038_217057 | 20 | 54344575-54492558   | 147984  | C20orf108, AURKA, CSTF1, C20orf32, C20orf43         | 0 | 0.41 | 0.00 | 0.02 |
| 20q#217083_217089 | 20 | 54785817-54982448   | 196632  |                                                     | 0 | 0.41 | 0.00 | 0.02 |
| 20q#216630_216635 | 20 | 48215177-48242634   | 27458   | CEBPB                                               | 0 | 0.41 | 0.00 | 0.02 |
| 14q#172566_172568 | 14 | 52429314-52441877   | 12564   | PLEKHC1                                             | 0 | 0.41 | 0.00 | 0.02 |
| 17q#197937_197951 | 17 | 50453912-50580072   | 126161  | STXBP4                                              | 0 | 0.41 | 0.00 | 0.02 |
| 18q#202720_202732 | 18 | 27523876-27636981   | 113106  |                                                     | 0 | 0.41 | 0.00 | 0.02 |
| 7q#106047_106061  | 7  | 143214581-143290680 | 76100   | AK125680                                            | 0 | 0.41 | 0.00 | 0.02 |
| 7q#106150_106266  | 7  | 144943887-146142978 | 1199092 | CNTNAP2                                             | 0 | 0.41 | 0.00 | 0.02 |
| 7q#106286_106293  | 7  | 146303858-146342562 | 38705   | CNTNAP2                                             | 0 | 0.41 | 0.00 | 0.02 |
| 8p#110220_110232  | 8  | 32705506-32903155   | 197650  | NRG1                                                | 0 | 0.41 | 0.00 | 0.02 |
| 7q#100167_100172  | 7  | 77376590-77427999   | 51410   | MAGI2                                               | 0 | 0.41 | 0.00 | 0.02 |
| 7q#106011_106032  | 7  | 142863310-143134939 | 271630  | AK125680, KIAA0738                                  | 0 | 0.41 | 0.00 | 0.02 |
| 7q#106039_106046  | 7  | 143171819-143210013 | 38195   | AK125680                                            | 0 | 0.41 | 0.00 | 0.02 |
| 7q#106267_106285  | 7  | 146154410-146296792 | 142383  | CNTNAP2                                             | 0 | 0.41 | 0.00 | 0.02 |
| 7q#106393_106412  | 7  | 147195466-147365887 | 170422  | CNTNAP2                                             | 0 | 0.41 | 0.00 | 0.02 |
| 7q#106062_106063  | 7  | 143302267-143308585 | 6319    | AK125680                                            | 0 | 0.41 | 0.00 | 0.02 |
| 7q#106413_106452  | 7  | 147375967-147832419 | 456453  | CNTNAP2, BC025670, C7orf33, CR591679                | 0 | 0.41 | 0.00 | 0.02 |
| 17q#200271_200281 | 17 | 75778652-75850449   | 71798   | CARD14, SGSH, SLC26A11, KIAA1618                    | 0 | 0.41 | 0.00 | 0.02 |
| 20q#216186_216197 | 20 | 43644486-43740519   | 96034   | WFDC9, WFDC11                                       | 0 | 0.41 | 0.00 | 0.02 |
| 20q#217151_217169 | 20 | 55639669-56042184   | 402516  | TMEPAI                                              | 0 | 0.41 | 0.00 | 0.02 |
| 6q#86528_86535    | 6  | 67553100-67846096   | 292997  |                                                     | 0 | 0.41 | 0.00 | 0.02 |
| 6q#90887_90902    | 6  | 130566621-130716411 | 149791  | SAMD3, AK091351                                     | 0 | 0.41 | 0.00 | 0.02 |
| 8p#109985_110021  | 8  | 30363499-30675293   | 311795  | RBPM5, GTF2E2, GSR                                  | 0 | 0.41 | 0.00 | 0.02 |
| 8p#109972_109984  | 8  | 30141183-30345882   | 204700  | DCTN6                                               | 0 | 0.41 | 0.00 | 0.02 |

|                   |    |                     |         |                                                    |   |      |      |      |
|-------------------|----|---------------------|---------|----------------------------------------------------|---|------|------|------|
| 8p#110124_110132  | 8  | 31877599-31954619   | 77021   | NRG1                                               | 0 | 0.41 | 0.00 | 0.02 |
| 8p#110082_110105  | 8  | 31260826-31720110   | 459285  | NRG1                                               | 0 | 0.41 | 0.00 | 0.02 |
| 22q#222108_222114 | 22 | 22690716-22719907   | 29192   | GSTT1, AK127991                                    | 0 | 0.41 | 0.00 | 0.02 |
| 8p#110080_110081  | 8  | 31219902-31235616   | 15715   |                                                    | 0 | 0.41 | 0.00 | 0.02 |
| 22q#221446_221476 | 22 | 16959358-17351512   | 392155  | TUBA8, CR620426, USP18, AK129567, DGCR6, PRODH     | 0 | 0.41 | 0.00 | 0.02 |
| 7q#102355_102361  | 7  | 101698472-101707862 | 9391    | ALKBH4, DKFZp434K1815, POLR2J                      | 0 | 0.41 | 0.00 | 0.02 |
| 18q#205111_205125 | 18 | 57854866-57981752   | 126887  | PIGN                                               | 0 | 0.41 | 0.00 | 0.02 |
| 22q#222075_222095 | 22 | 22493376-22597747   | 104372  | SMARCB1, DERL3, SLC2A11, AK126983                  | 0 | 0.41 | 0.00 | 0.02 |
| 7q#100559_100670  | 7  | 82182474-83578724   | 1396251 | 011131, BX649041, AF131772, Y19188, SEMA3E, SEMA   | 0 | 0.41 | 0.00 | 0.02 |
| 21q#221143_221144 | 21 | 45858095-45889500   | 11406   |                                                    | 0 | 0.41 | 0.00 | 0.02 |
| 21q#221210_221215 | 21 | 46440982-46472497   | 31516   | LSS                                                | 0 | 0.41 | 0.00 | 0.02 |
| 20q#216976_217028 | 20 | 52723474-54206554   | 1483081 | CBLN4                                              | 0 | 0.41 | 0.00 | 0.02 |
| 20q#217136_217150 | 20 | 55517134-55634581   | 117448  | CTCF, AK124277, PCK1, ZBP1                         | 0 | 0.41 | 0.00 | 0.02 |
| 20q#217058_217082 | 20 | 54510611-54738205   | 227595  | TF43, AK131203, C20orf106, AK097528, LOC388799, TF | 0 | 0.41 | 0.00 | 0.02 |
| 14q#172823_172860 | 14 | 54970184-55424328   | 454145  | TBPL2, AB075499, AK124927, KTN1                    | 0 | 0.41 | 0.00 | 0.02 |
| 14q#172536_172565 | 14 | 52194468-52417940   | 223473  | ERO1L, PSMC6, STYX, GNPAT1, PLEKHC1                | 0 | 0.41 | 0.00 | 0.02 |
| 14q#172813_172822 | 14 | 54903305-54965163   | 61859   | KIAA0831, TBPL2                                    | 0 | 0.41 | 0.00 | 0.02 |
| 14q#172401_172402 | 14 | 50946632-50969150   | 22519   |                                                    | 0 | 0.41 | 0.00 | 0.02 |
| 14q#172569_172581 | 14 | 52448166-52567040   | 118875  | PLEKHC1                                            | 0 | 0.41 | 0.00 | 0.02 |
| 14q#172604_172617 | 14 | 52801333-53000564   | 199232  | AK096400                                           | 0 | 0.41 | 0.00 | 0.02 |
| 14q#172654_172659 | 14 | 53430713-53479201   | 48489   | AK096400                                           | 0 | 0.41 | 0.00 | 0.02 |
| 12q#157232_157246 | 12 | 74516920-74714831   | 197912  | PHLDA1                                             | 0 | 0.41 | 0.00 | 0.02 |
| 17q#200541_200568 | 17 | 77941295-78154478   | 213184  | 9297, FLJ22222, HEXDC, C17orf62, NARF, FOXK2, AL8  | 0 | 0.41 | 0.00 | 0.02 |
| 17q#200309_200319 | 17 | 76101927-76204237   | 102311  | KIAA1303                                           | 0 | 0.41 | 0.00 | 0.02 |
| 17q#200307_200308 | 17 | 76080242-76090701   | 10460   |                                                    | 0 | 0.41 | 0.00 | 0.02 |
| 17q#200173_200181 | 17 | 74612265-74706668   | 94404   |                                                    | 0 | 0.41 | 0.00 | 0.02 |
| 17q#200303_200306 | 17 | 76058764-76074761   | 15998   | NPTX1                                              | 0 | 0.41 | 0.00 | 0.02 |
| 7q#99074_99081    | 7  | 63341967-63452149   | 110183  | ZNF680                                             | 0 | 0.41 | 0.00 | 0.02 |
| 18q#202582_202614 | 18 | 24650677-25625984   | 975308  |                                                    | 0 | 0.41 | 0.00 | 0.02 |
| 18q#202680_202719 | 18 | 27173827-27517734   | 343908  | , DSG4, DSG3, DSG2, BC017410, BC042986, TTR, B4G   | 0 | 0.41 | 0.00 | 0.02 |
| 7q#100051_100057  | 7  | 75966125-76135099   | 168975  | BC013192                                           | 0 | 0.41 | 0.00 | 0.02 |
| 7q#99046_99073    | 7  | 62989857-63295255   | 305399  | AX721100, ZNF679, AK123141                         | 0 | 0.41 | 0.00 | 0.02 |
| 18q#202615_202616 | 18 | 25657020-25713183   | 56164   |                                                    | 0 | 0.41 | 0.00 | 0.02 |
| 8p#110319_110325  | 8  | 34170791-34289369   | 118579  |                                                    | 0 | 0.41 | 0.00 | 0.02 |
| 18q#205173_205193 | 18 | 58540712-58679285   | 138574  | PHLPP                                              | 0 | 0.41 | 0.00 | 0.02 |
| 7q#100065_100166  | 7  | 76397166-77366480   | 969315  | LOC54103, PTPN12, AK027141, BC037783, RSBN1L, T    | 0 | 0.41 | 0.00 | 0.02 |
| 7q#102255_102260  | 7  | 100703439-100748154 | 44716   | EMID2                                              | 0 | 0.41 | 0.00 | 0.02 |
| 18q#205163_205172 | 18 | 58376865-58531534   | 154670  | ZCCHC2, AL832323                                   | 0 | 0.41 | 0.00 | 0.02 |
| 12q#157953_157956 | 12 | 85230255-85266077   | 35823   | MGAT4C                                             | 0 | 0.41 | 0.00 | 0.02 |
| 6q#86508_86512    | 6  | 66949287-67086471   | 137185  |                                                    | 0 | 0.41 | 0.00 | 0.02 |
| 6q#86536_86539    | 6  | 67868204-67948562   | 80359   |                                                    | 0 | 0.41 | 0.00 | 0.02 |
| 6q#86540_86550    | 6  | 67978300-68328349   | 350050  |                                                    | 0 | 0.41 | 0.00 | 0.02 |
| 6q#86513_86524    | 6  | 67113676-67425381   | 311706  |                                                    | 0 | 0.41 | 0.00 | 0.02 |
| 6q#86526_86527    | 6  | 67485611-67530232   | 44622   |                                                    | 0 | 0.41 | 0.00 | 0.02 |
| 6q#90875_90886    | 6  | 130467272-130555008 | 87737   | L3MBTL3, SAMD3                                     | 0 | 0.41 | 0.00 | 0.02 |
| 6q#90903_90987    | 6  | 130722514-131947162 | 1224649 | 851, AB067500, KIAA1913, AK091900, EPB41L2, AKAP7  | 0 | 0.41 | 0.00 | 0.02 |
| 6q#91034_91057    | 6  | 132460153-132777114 | 316962  | AF086187, MOXD1                                    | 0 | 0.41 | 0.00 | 0.02 |
| 8p#109969_109971  | 8  | 30117657-30136234   | 18578   | DCTN6                                              | 0 | 0.41 | 0.00 | 0.02 |
| 18p#201891_201892 | 18 | 14091869-14092527   | 659     | BC037787                                           | 0 | 0.41 | 0.00 | 0.02 |
| 18p#201875_201890 | 18 | 13861404-14091582   | 230179  | MC2R, BC037787                                     | 0 | 0.41 | 0.00 | 0.02 |
| 6q#92609_92628    | 6  | 151910707-152117957 | 207251  | C6orf97, X86816                                    | 0 | 0.41 | 0.00 | 0.02 |
| 18q#203739_203765 | 18 | 41653674-41845183   | 191510  | CD33L3, KIAA1632, PSTPIP2                          | 0 | 0.41 | 0.00 | 0.02 |
| 22q#221723_221731 | 22 | 19431676-19477438   | 45763   | PIK4CA                                             | 0 | 0.41 | 0.00 | 0.02 |
| 22q#221856_221893 | 22 | 20716203-21053024   | 336822  | AK131325, BC089413, VPREB1                         | 0 | 0.41 | 0.00 | 0.02 |
| 22q#222001_222008 | 22 | 21978717-22064039   | 85323   | BCR, FLJ31568                                      | 0 | 0.41 | 0.00 | 0.02 |

|                   |    |                     |         |                                                     |   |      |      |      |
|-------------------|----|---------------------|---------|-----------------------------------------------------|---|------|------|------|
| 22q#221417_221445 | 22 | 16716207-16951898   | 235692  | 47382, AK127487, AK122725, AK123935, PEX26, CR62    | 0 | 0.41 | 0.00 | 0.02 |
| 22q#221477_221559 | 22 | 17359014-17931009   | 571996  | 593487, SLC25A1, CLTCL1, HIRA, MRPL40, BC030758     | 0 | 0.41 | 0.00 | 0.02 |
| 22q#221732_221787 | 22 | 19485145-20126215   | 641071  | C026248, AIFL, LZTR1, THAP7, CR597525, MGC16703,    | 0 | 0.41 | 0.00 | 0.02 |
| 22q#221804_221855 | 22 | 20325510-20709364   | 383855  | L2, YPEL1, AL157438, MAPK1, PPM1F, TOP3B, AK131     | 0 | 0.41 | 0.00 | 0.02 |
| 22q#221328_221364 | 22 | 15925191-16329722   | 404532  | 865, IL17RA, CECR6, BC021738, CECR5, CECR1, AF2     | 0 | 0.41 | 0.00 | 0.02 |
| 22q#222032_222074 | 22 | 22249883-22489950   | 240068  | 8, BC050388, Rgr, ZINF70, VPREB3, C22orf15, AK12591 | 0 | 0.41 | 0.00 | 0.02 |
| 22q#221788_221803 | 22 | 20136533-20323156   | 186624  | UBE2L3, FLJ36046, SDF2L1                            | 0 | 0.41 | 0.00 | 0.02 |
| 7q#100671_100673  | 7  | 83617616-83683408   | 65793   |                                                     | 0 | 0.41 | 0.00 | 0.02 |
| 20q#217567_217599 | 20 | 6021621-60412256    | 194636  | H3, FLJ44790, OSBPL2, ADRM1, LAMA5, RPS21, CABL     | 0 | 0.41 | 0.00 | 0.02 |
| 20q#217704_217715 | 20 | 61264602-61321213   | 56612   | AK124784, YTHDF1                                    | 0 | 0.41 | 0.00 | 0.02 |
| 14q#172100_172107 | 14 | 47111238-47163723   | 52486   | AY369208                                            | 0 | 0.41 | 0.00 | 0.02 |
| 18q#202733_202756 | 18 | 27648207-27893887   | 245681  | KIAA1012, RNF125                                    | 0 | 0.41 | 0.00 | 0.02 |
| 7q#100059_100064  | 7  | 76172097-76282123   | 110027  | BC013192, U38980                                    | 0 | 0.41 | 0.00 | 0.02 |
| 7p#97507_97520    | 7  | 37923687-38065921   | 142235  | STARD3NL, AK026401, M16804                          | 0 | 0.41 | 0.00 | 0.02 |
| 7p#97534_97676    | 7  | 38154547-39509760   | 1355214 | 9452, AK125646, AMPH, VPS41, AK023033, POU6F2, C    | 0 | 0.41 | 0.00 | 0.02 |
| 14q#172458_172495 | 14 | 51471422-51843834   | 372413  | GNG2, C14orf166, PTGDR                              | 0 | 0.41 | 0.00 | 0.02 |
| 14q#172504_172534 | 14 | 51944718-52179024   | 234307  | KIAA1344, AK123953, BX647179, ERO1L                 | 0 | 0.41 | 0.00 | 0.02 |
| 7p#97530_97533    | 7  | 38119615-38149800   | 30186   | M16804, BC017861, M13231                            | 0 | 0.41 | 0.00 | 0.02 |
| 7q#105661_105737  | 7  | 139987665-140656682 | 669018  | BRAF, MRPS33, BC015911, LOC401410                   | 0 | 0.41 | 0.00 | 0.02 |
| 14q#170804_170839 | 14 | 30587723-30935743   | 348021  | AP4S1, AB030654, HECTD1, CR749444                   | 0 | 0.41 | 0.00 | 0.02 |
| 14q#172403_172423 | 14 | 50997672-51142024   | 144353  | AL833158                                            | 0 | 0.41 | 0.00 | 0.02 |
| 14q#172447_172452 | 14 | 51376334-51413951   | 37618   | BC041446                                            | 0 | 0.41 | 0.00 | 0.02 |
| 14q#172618_172653 | 14 | 53008218-53419533   | 411316  | AK096400                                            | 0 | 0.41 | 0.00 | 0.02 |
| 7p#97522_97529    | 7  | 38077657-38112153   | 34497   | TARP, M16804                                        | 0 | 0.41 | 0.00 | 0.02 |
| 7q#105937_105940  | 7  | 142299248-142333027 | 33780   |                                                     | 0 | 0.41 | 0.00 | 0.02 |
| 7q#105953_106010  | 7  | 142412450-142863125 | 450676  | CASP2, CLCN1, KIAA0773, ZYX, EPHA1, AL833583, T     | 0 | 0.41 | 0.00 | 0.02 |
| 7q#106033_106038  | 7  | 143138980-143159814 | 20835   | OR6B1, AK125680                                     | 0 | 0.41 | 0.00 | 0.02 |
| 7q#104978_105005  | 7  | 132969810-133173961 | 204152  | EXOC4                                               | 0 | 0.41 | 0.00 | 0.02 |
| 18q#205432_205433 | 18 | 62144047-62185652   | 41606   |                                                     | 0 | 0.41 | 0.00 | 0.02 |
| 7q#105941_105952  | 7  | 142342680-142407505 | 64826   | PIP, TAS2R39                                        | 0 | 0.41 | 0.00 | 0.02 |
| 18q#205434_205457 | 18 | 62216466-62608487   | 392022  | CDH19                                               | 0 | 0.41 | 0.00 | 0.02 |
| 20q#217544_217566 | 20 | 60064800-60211508   | 146709  | TAF4, LSM14B, PSMA7, SS18L1, GTPBP5                 | 0 | 0.41 | 0.00 | 0.02 |
| 6q#87273_87275    | 6  | 76990217-77057542   | 67326   |                                                     | 0 | 0.41 | 0.00 | 0.02 |
| 6q#87276_87279    | 6  | 77079694-77193932   | 114239  |                                                     | 0 | 0.41 | 0.00 | 0.02 |
| 8p#110133_110166  | 8  | 31968872-32235224   | 266353  | NRG1                                                | 0 | 0.41 | 0.00 | 0.02 |
| 18q#202570_202581 | 18 | 24329250-24624560   | 295311  |                                                     | 0 | 0.41 | 0.00 | 0.02 |
| 18q#202617_202679 | 18 | 25742236-27162322   | 1420087 | DSC3, DSC2, DSC1, DSG1                              | 0 | 0.41 | 0.00 | 0.02 |
| 8p#110106_110123  | 8  | 31727599-31867388   | 139790  | NRG1                                                | 0 | 0.41 | 0.00 | 0.02 |
| 12q#157957_158021 | 12 | 85275646-86300151   | 1024506 | MGAT4C                                              | 0 | 0.41 | 0.00 | 0.02 |
| 8p#110312_110317  | 8  | 34017074-34121894   | 104821  |                                                     | 0 | 0.41 | 0.00 | 0.02 |
| 18q#204769_204906 | 18 | 53771154-55082036   | 1310883 | , BC047525, HAK, BX647796, MALT1, ZNF532, SEC11     | 0 | 0.41 | 0.00 | 0.02 |
| 8p#110246_110298  | 8  | 33211353-33715832   | 504480  | FUT10, RBM13, C8orf41, RNF122, DUSP26               | 0 | 0.41 | 0.00 | 0.02 |
| 20q#215483_215517 | 20 | 35519684-35896113   | 376430  | AK093009, BLCAP, FLJ42133, CTNNDL1                  | 0 | 0.41 | 0.00 | 0.02 |
| 20q#215526_215546 | 20 | 35991806-36190301   | 198496  | C20orf102, KIAA0406, C20orf77                       | 0 | 0.41 | 0.00 | 0.02 |
| 12q#157230_157231 | 12 | 74486263-74501917   | 15655   |                                                     | 0 | 0.41 | 0.00 | 0.02 |
| 14q#171384_171493 | 14 | 36400747-37289374   | 868628  | SLC25A21, AK057476, MIPOL1, FOXA1, BC038110         | 0 | 0.41 | 0.00 | 0.02 |
| 14q#171503_171636 | 14 | 37362898-38970150   | 1607253 | , AK125018, SEC23A, SIP1, TRAPPC6B, PNN, Y09703,    | 0 | 0.41 | 0.00 | 0.02 |
| 14q#171976_171981 | 14 | 45847806-45940143   | 92338   |                                                     | 0 | 0.41 | 0.00 | 0.02 |
| 14q#172052_172099 | 14 | 46741296-47096346   | 355051  | MAMDC1, AY369208                                    | 0 | 0.41 | 0.00 | 0.02 |
| 7p#97319_97506    | 7  | 35949586-37896597   | 1947012 | C028678, ANLN, AOA, ELMO1, BC043356, GPR141, T      | 0 | 0.41 | 0.00 | 0.02 |
| 14q#172453_172457 | 14 | 51431366-51464305   | 32940   | GNG2                                                | 0 | 0.41 | 0.00 | 0.02 |
| 14q#171160_171295 | 14 | 34217577-35386556   | 1168980 | f10, CR602202, KIAA0391, BC050339, PSMA6, NFKBIA    | 0 | 0.41 | 0.00 | 0.02 |
| 14q#171637_171651 | 14 | 38979316-39308088   | 328773  |                                                     | 0 | 0.41 | 0.00 | 0.02 |
| 14q#171982_172051 | 14 | 45975157-46732144   | 756988  | MAMDC1                                              | 0 | 0.41 | 0.00 | 0.02 |
| 14q#170793_170803 | 14 | 30511768-30579482   | 67715   | STRN3, AP4S1                                        | 0 | 0.41 | 0.00 | 0.02 |

|                   |    |                     |         |                                                   |   |      |      |      |
|-------------------|----|---------------------|---------|---------------------------------------------------|---|------|------|------|
| 14q#170840_170885 | 14 | 30941409-31362181   | 420773  | BC062720, BC041327, C14orf126, NUBPL              | 0 | 0.41 | 0.00 | 0.02 |
| 14q#171366_171383 | 14 | 36264559-36390668   | 126110  | SLC25A21                                          | 0 | 0.41 | 0.00 | 0.02 |
| 14q#171494_171502 | 14 | 37278626-37357932   | 79307   | BC038110, TTC6                                    | 0 | 0.41 | 0.00 | 0.02 |
| 7p#97272_97318    | 7  | 35140486-35941042   | 800557  | AL832092, HERPUD2, CR595224, SEPT17               | 0 | 0.41 | 0.00 | 0.02 |
| 14q#171920_171974 | 14 | 44720634-45778750   | 1058117 | FANCM, C14orf106                                  | 0 | 0.41 | 0.00 | 0.02 |
| 18q#205459_205489 | 18 | 62677750-63391952   | 714203  | AL831865, C18orf4, BC053410                       | 0 | 0.41 | 0.00 | 0.02 |
| 20q#215435_215445 | 20 | 35058120-35154942   | 96823   | RBL1                                              | 0 | 0.41 | 0.00 | 0.02 |
| 6q#89660_89688    | 6  | 114100612-114425153 | 324542  | MARCKS, BC037331, FLJ34503, HDAC2, BC042098       | 0 | 0.41 | 0.00 | 0.02 |
| 6q#89786_89803    | 6  | 116673147-116797697 | 124551  | 5DC1, TSPYL4, AK093256, AB075478, TSPYL1, AK095   | 0 | 0.41 | 0.00 | 0.02 |
| 6q#86600_86604    | 6  | 69518293-69551226   | 32934   | BAI3                                              | 0 | 0.41 | 0.00 | 0.02 |
| 6q#86605_86613    | 6  | 69558891-69649447   | 90557   | BAI3                                              | 0 | 0.41 | 0.00 | 0.02 |
| 6q#86614_86649    | 6  | 69661501-69979365   | 317865  | BAI3                                              | 0 | 0.41 | 0.00 | 0.02 |
| 6q#91166_91192    | 6  | 133915088-134240915 | 325828  | BC041459                                          | 0 | 0.41 | 0.00 | 0.02 |
| 6q#90728_90874    | 6  | 128760422-130459610 | 1699189 | PRK, LAMA2, BC035400, ARHGAP18, C6orf191, L3MB1   | 0 | 0.41 | 0.00 | 0.02 |
| 6q#86650_86668    | 6  | 69987895-70149525   | 161631  | BAI3                                              | 0 | 0.41 | 0.00 | 0.02 |
| 6q#86669_86676    | 6  | 70155509-70324640   | 169132  | BAI3                                              | 0 | 0.41 | 0.00 | 0.02 |
| 6q#92525_92555    | 6  | 151181936-151435017 | 253082  | PLEKHG1, MTHFD1L                                  | 0 | 0.41 | 0.00 | 0.02 |
| 6q#92566_92598    | 6  | 151515031-151840878 | 325848  | THFD1L, BC031960, AKAP12, ZBTB2, AK023412, C6orf  | 0 | 0.41 | 0.00 | 0.02 |
| 6q#92486_92524    | 6  | 150649950-151173420 | 523471  | PPP1R14C, C6orf71, PLEKHG1                        | 0 | 0.41 | 0.00 | 0.02 |
| 6q#92599_92608    | 6  | 151846390-151904796 | 58407   | C6orf96, C6orf211                                 | 0 | 0.41 | 0.00 | 0.02 |
| 6q#92629_92652    | 6  | 152138403-152366253 | 227851  | X86816, ESR1                                      | 0 | 0.41 | 0.00 | 0.02 |
| 22q#22152_222268  | 22 | 22992246-23930113   | 937868  | AF163312, C22orf13, SNRPD3, GGT1, AL832738, PIWIL | 0 | 0.41 | 0.00 | 0.02 |
| 2p#24084_24092    | 2  | 60794596-60910398   | 115803  | PAPOLG                                            | 0 | 0.41 | 0.00 | 0.02 |
| 2p#24530_24563    | 2  | 65590296-65920743   | 330448  | FLJ16124                                          | 0 | 0.41 | 0.00 | 0.02 |
| 22q#221311_221326 | 22 | 15768270-15903055   | 134786  | GAB4, AY026052                                    | 0 | 0.41 | 0.00 | 0.02 |
| 22q#221400_221416 | 22 | 16591905-16710480   | 118576  | BID, AK097861, AB020626, BX647382                 | 0 | 0.41 | 0.00 | 0.02 |
| 22q#225003_225016 | 22 | 46032724-46205884   | 168611  | BC043000, BC037972                                | 0 | 0.41 | 0.00 | 0.02 |
| 6p#86103_86129    | 6  | 56637763-56898637   | 260875  | DST, U31851                                       | 0 | 0.41 | 0.00 | 0.02 |
| 22q#221302_221310 | 22 | 15638990-15743760   | 104771  | XKR3, AY026053                                    | 0 | 0.41 | 0.00 | 0.02 |
| 22q#221365_221399 | 22 | 16340285-16586185   | 245901  | 5133, AK095590, SLC25A18, ATP6V1E1, AF075073, BC  | 0 | 0.41 | 0.00 | 0.02 |
| 22q#224982_224984 | 22 | 45843532-45858166   | 14635   | TBC1D22A                                          | 0 | 0.41 | 0.00 | 0.02 |
| 22q#224992_225002 | 22 | 45916409-46021833   | 105425  |                                                   | 0 | 0.41 | 0.00 | 0.02 |
| 22q#224894_224974 | 22 | 45183605-45783740   | 602136  | CELSR1, AK092202, AB018310, DIP, CERK, TBC1D22A   | 0 | 0.41 | 0.00 | 0.02 |
| 22q#224975_224981 | 22 | 45792845-45836801   | 43957   | TBC1D22A                                          | 0 | 0.41 | 0.00 | 0.02 |
| 22q#224985_224991 | 22 | 45864537-45907843   | 43307   | TBC1D22A                                          | 0 | 0.41 | 0.00 | 0.02 |
| 7q#105890_105891  | 7  | 141965869-141971010 | 5142    | LOC647353                                         | 0 | 0.41 | 0.00 | 0.02 |
| 7q#105892_105893  | 7  | 141974616-141978380 | 3765    | LOC647353                                         | 0 | 0.41 | 0.00 | 0.02 |
| 7q#105894_105895  | 7  | 141984935-141985512 | 578     | LOC647353                                         | 0 | 0.41 | 0.00 | 0.02 |
| 5q#70836_70891    | 5  | 53044957-53610064   | 565108  | AF130091, ARL15                                   | 0 | 0.41 | 0.00 | 0.02 |
| 20q#215518_215525 | 20 | 35901505-35979942   | 78438   | CTNBL1, C20orf102                                 | 0 | 0.41 | 0.00 | 0.02 |
| 7q#104976_104977  | 7  | 132949869-132959501 | 9633    | EXOC4                                             | 0 | 0.41 | 0.00 | 0.02 |
| 12q#157058_157062 | 12 | 71189970-71229119   | 39150   | TRHDE                                             | 0 | 0.41 | 0.00 | 0.02 |
| 14q#170892_170967 | 14 | 31459353-32253930   | 794578  | BC007251, ARHGAP5, AB032969, AKAP6                | 0 | 0.41 | 0.00 | 0.02 |
| 14q#170987_171100 | 14 | 32420386-33386133   | 965748  | AK126681, NPAS3                                   | 0 | 0.41 | 0.00 | 0.02 |
| 14q#170756_170762 | 14 | 30147001-30197760   | 50760   | KIAA1333, SCFD1                                   | 0 | 0.41 | 0.00 | 0.02 |
| 14q#170763_170792 | 14 | 30209271-30503369   | 294099  | SCFD1, COCH, STRN3                                | 0 | 0.41 | 0.00 | 0.02 |
| 14q#170887_170891 | 14 | 31373492-31415488   | 41997   | NUBPL                                             | 0 | 0.41 | 0.00 | 0.02 |
| 14q#170968_170986 | 14 | 32258731-32398506   | 139776  | AKAP6                                             | 0 | 0.41 | 0.00 | 0.02 |
| 7p#95078_95107    | 7  | 8884507-9475366     | 590860  | BC039511, AY423624                                | 0 | 0.41 | 0.00 | 0.02 |
| 7p#97194_97271    | 7  | 34264703-35118245   | 853543  | AAA1, NPSR1, AJ011911, DQ287932, BX648666, TBX20  | 0 | 0.41 | 0.00 | 0.02 |
| 11q#144578_144585 | 11 | 64292027-64320729   | 28703   | SF1, MAP4K2                                       | 0 | 0.41 | 0.00 | 0.02 |
| 17q#196083_196086 | 17 | 32069339-32176737   | 107399  |                                                   | 0 | 0.41 | 0.00 | 0.02 |
| 3q#53685_53686    | 3  | 196982148-196991452 | 9305    | MUC4                                              | 0 | 0.41 | 0.00 | 0.02 |
| 3q#53687_53706    | 3  | 197004892-197189517 | 184626  | MUC4, TNK2, BC071730                              | 0 | 0.41 | 0.00 | 0.02 |
| 5q#70908_70962    | 5  | 53807612-54489157   | 681546  | SNAG1, BC060791, ESM1, GZMK, GZMA, FLJ37927       | 0 | 0.41 | 0.00 | 0.02 |

|                   |    |                     |         |                                                    |   |      |      |      |
|-------------------|----|---------------------|---------|----------------------------------------------------|---|------|------|------|
| 5q#70892_70907    | 5  | 53617956-53801264   | 183309  | ARL15, HSPB3                                       | 0 | 0.41 | 0.00 | 0.02 |
| 14q#173291_173302 | 14 | 59953799-60046885   | 93087   | C14orf39, SIX6                                     | 0 | 0.41 | 0.00 | 0.02 |
| 14q#173038_173045 | 14 | 57468798-57567849   | 99052   | C14orf37                                           | 0 | 0.41 | 0.00 | 0.02 |
| 14q#173023_173031 | 14 | 57305568-57378302   | 72735   |                                                    | 0 | 0.41 | 0.00 | 0.02 |
| 7p#95613_95989    | 7  | 16423526-21614019   | 5190494 | AK097178, HDAC9, Y11180, TWIST1, BC043576, TWIS    | 0 | 0.41 | 0.00 | 0.02 |
| 6q#87314_87349    | 6  | 78236135-78769807   | 533673  |                                                    | 0 | 0.41 | 0.00 | 0.02 |
| 6q#87360_87373    | 6  | 79161515-79578827   | 417313  |                                                    | 0 | 0.41 | 0.00 | 0.02 |
| 6q#87280_87282    | 6  | 77230101-77289192   | 59092   |                                                    | 0 | 0.41 | 0.00 | 0.02 |
| 18q#203720_203738 | 18 | 41500698-41651311   | 150614  | SLC14A2, SLC14A1                                   | 0 | 0.41 | 0.00 | 0.02 |
| 18q#203612_203719 | 18 | 40178935-41493602   | 1314668 | 51727, BC031271, BC062338, SETBP1, AK122698, SLC   | 0 | 0.41 | 0.00 | 0.02 |
| 18q#202564_202568 | 18 | 24151036-24265743   | 114708  |                                                    | 0 | 0.41 | 0.00 | 0.02 |
| 18q#204646_204650 | 18 | 52521372-52559969   | 38598   | WDR7                                               | 0 | 0.41 | 0.00 | 0.02 |
| 18q#204651_204678 | 18 | 52565785-52800292   | 234508  | WDR7                                               | 0 | 0.41 | 0.00 | 0.02 |
| 22q#221945_221960 | 22 | 21454949-21607669   | 152721  | BC089413, AF076199, AF054650                       | 0 | 0.41 | 0.00 | 0.02 |
| 22q#221994_222000 | 22 | 21917032-21967777   | 50746   | BCR                                                | 0 | 0.41 | 0.00 | 0.02 |
| 22q#222116_222136 | 22 | 22731544-22881679   | 150136  | CABIN1                                             | 0 | 0.41 | 0.00 | 0.02 |
| 18q#204679_204768 | 18 | 52812903-53741507   | 928605  | 5, ST8SIA3, ONECUT2, FECH, NARS, BC040476, ATP8    | 0 | 0.41 | 0.00 | 0.02 |
| 22q#221691_221693 | 22 | 19156500-19168877   | 12378   | KLHL22                                             | 0 | 0.41 | 0.00 | 0.02 |
| 22q#221707_221722 | 22 | 19278964-19426560   | 147597  | BC035867, PIK4CA                                   | 0 | 0.41 | 0.00 | 0.02 |
| 22q#221894_221944 | 22 | 21061198-21447101   | 385904  | BC089413, SUHW2, SUHW1, PRAME                      | 0 | 0.41 | 0.00 | 0.02 |
| 22q#221961_221993 | 22 | 21625980-21905043   | 279064  | RTDR1, RAB36, BCR                                  | 0 | 0.41 | 0.00 | 0.02 |
| 22q#222010_222014 | 22 | 22075712-22119091   | 43380   |                                                    | 0 | 0.41 | 0.00 | 0.02 |
| 22q#221685_221690 | 22 | 19120346-19148442   | 28097   | KLHL22                                             | 0 | 0.41 | 0.00 | 0.02 |
| 22q#221560_221564 | 22 | 17959312-18064879   | 105568  |                                                    | 0 | 0.41 | 0.00 | 0.02 |
| 22q#221694_221706 | 22 | 19173622-19267416   | 93795   | KLHL22, PCQAP                                      | 0 | 0.41 | 0.00 | 0.02 |
| 22q#222015_222031 | 22 | 22126490-22245035   | 118546  | LOC388882, IGLL1                                   | 0 | 0.41 | 0.00 | 0.02 |
| 22q#221664_221671 | 22 | 18654320-18984160   | 329841  | X91348, DGCR6L                                     | 0 | 0.41 | 0.00 | 0.02 |
| 22q#221673_221684 | 22 | 19057981-19112551   | 54571   | AJ583822, ZNF74, SCARF2                            | 0 | 0.41 | 0.00 | 0.02 |
| 12q#155365_155370 | 12 | 52685553-52704958   | 19406   | HOXC8, HOXC4                                       | 0 | 0.41 | 0.00 | 0.02 |
| 9q#126454_126462  | 9  | 125087720-125154365 | 66646   | GAPVD1                                             | 0 | 0.41 | 0.00 | 0.02 |
| 18p#201191_201206 | 18 | 6212615-6355459     | 142845  | L3MBTL4                                            | 0 | 0.41 | 0.00 | 0.02 |
| 9q#126463_126469  | 9  | 125162290-125202384 | 40095   | GAPVD1                                             | 0 | 0.41 | 0.00 | 0.02 |
| 9q#126553_126559  | 9  | 126108286-126197561 | 89276   | C9orf28                                            | 0 | 0.41 | 0.00 | 0.02 |
| 18p#201207_201224 | 18 | 6366938-6735432     | 368495  | L3MBTL4                                            | 0 | 0.41 | 0.00 | 0.02 |
| 9q#126418_126453  | 9  | 124780680-125081287 | 300608  | SOLGA1, BC037940, C9orf126, PPP6C, RABEPK, HSPA    | 0 | 0.41 | 0.00 | 0.02 |
| 9q#126567_126681  | 9  | 126263153-127312975 | 1049823 | 3, AB007874, AB082524, RALGPS1, AK025650, GARNL    | 0 | 0.41 | 0.00 | 0.02 |
| 9q#126682_126684  | 9  | 127320760-127337144 | 16385   | LRSAM1                                             | 0 | 0.41 | 0.00 | 0.02 |
| 6q#89822_89825    | 6  | 116960813-116981553 | 20741   | C6orf78                                            | 0 | 0.41 | 0.00 | 0.02 |
| 6q#90154_90158    | 6  | 121697093-121773544 | 76452   | C6orf170                                           | 0 | 0.41 | 0.00 | 0.02 |
| 18p#201225_201232 | 18 | 6747445-6827424     | 79980   | AB037735, ARHGAP28                                 | 0 | 0.41 | 0.00 | 0.02 |
| 9q#126356_126417  | 9  | 124357110-124773170 | 416061  | R6A1, AK074709, OLFML2A, RPL35, AK056174, ARPC5    | 0 | 0.41 | 0.00 | 0.02 |
| 9q#126470_126552  | 9  | 125211929-126066617 | 854689  | MAPKAP1, AF159054, PBX3                            | 0 | 0.41 | 0.00 | 0.02 |
| 9q#126560_126566  | 9  | 126205052-126255080 | 50029   | C9orf28                                            | 0 | 0.41 | 0.00 | 0.02 |
| 6q#89826_89931    | 6  | 116997404-118309698 | 1312295 | NA5, BC038997, GPRC6A, RFXDC1, VGLL2, ROS1, X5     | 0 | 0.41 | 0.00 | 0.02 |
| 6q#89969_90034    | 6  | 118671528-119379653 | 708126  | 84, C6orf204, BC064835, AK000177, AF151856, ASF1A, | 0 | 0.41 | 0.00 | 0.02 |
| 6q#90533_90549    | 6  | 126547645-126791519 | 243875  | C6orf173, AL832235                                 | 0 | 0.41 | 0.00 | 0.02 |
| 6q#90589_90604    | 6  | 127376817-127541657 | 164841  | AK127472, RSPO3                                    | 0 | 0.41 | 0.00 | 0.02 |
| 6q#92287_92305    | 6  | 148247915-148727508 | 479594  | SASH1                                              | 0 | 0.41 | 0.00 | 0.02 |
| 6q#90035_90046    | 6  | 119392025-119487560 | 95536   | C6orf60, BX538186                                  | 0 | 0.41 | 0.00 | 0.02 |
| 6q#90112_90116    | 6  | 120891462-120999047 | 107586  |                                                    | 0 | 0.41 | 0.00 | 0.02 |
| 6q#90122_90153    | 6  | 121197515-121689527 | 492013  | C6orf170                                           | 0 | 0.41 | 0.00 | 0.02 |
| 6q#90228_90276    | 6  | 123037949-123641219 | 603271  | PKIB, FABP7, SMPDL3A, C6orf213, AK055705, TRDN     | 0 | 0.41 | 0.00 | 0.02 |
| 6q#90529_90532    | 6  | 126454543-126533180 | 78638   |                                                    | 0 | 0.41 | 0.00 | 0.02 |
| 6q#91193_91198    | 6  | 134248093-134287513 | 39421   | BC041459, TCF21, AK093019                          | 0 | 0.41 | 0.00 | 0.02 |
| 6q#91225_91245    | 6  | 134560881-134814159 | 253279  | AK055077, AY944074                                 | 0 | 0.41 | 0.00 | 0.02 |

|                   |    |                     |         |                                                  |   |      |      |      |
|-------------------|----|---------------------|---------|--------------------------------------------------|---|------|------|------|
| 6q#91979_91984    | 6  | 144501760-144551029 | 49270   | STX11                                            | 0 | 0.41 | 0.00 | 0.02 |
| 6q#92239_92286    | 6  | 147568864-148215549 | 646686  | STXBP5, LOC389432                                | 0 | 0.41 | 0.00 | 0.02 |
| 6q#90277_90289    | 6  | 123650030-123766388 | 116359  | TRDN                                             | 0 | 0.41 | 0.00 | 0.02 |
| 6q#91216_91224    | 6  | 134489652-134553809 | 64158   | SGK, AK055077                                    | 0 | 0.41 | 0.00 | 0.02 |
| 6q#92068_92074    | 6  | 145684223-145862825 | 178603  |                                                  | 0 | 0.41 | 0.00 | 0.02 |
| 6q#92449_92463    | 6  | 150355245-150444265 | 89021   | ULBP2, ULBP1, AF425244                           | 0 | 0.41 | 0.00 | 0.02 |
| 6q#91962_91978    | 6  | 144318226-144488720 | 170495  | PLAGL1, SF3B5                                    | 0 | 0.41 | 0.00 | 0.02 |
| 6q#91985_92065    | 6  | 144557082-145593146 | 1036065 | UTRN                                             | 0 | 0.41 | 0.00 | 0.02 |
| 6q#92473_92480    | 6  | 150528056-150598386 | 70331   | PPP1R14C                                         | 0 | 0.41 | 0.00 | 0.02 |
| 6q#92066_92067    | 6  | 145632460-145660165 | 27706   |                                                  | 0 | 0.41 | 0.00 | 0.02 |
| 6q#92404_92448    | 6  | 149905776-150350029 | 444254  | KATNA1, LATS1, NUP43, PCMT1, LRP11, BC016788, R  | 0 | 0.41 | 0.00 | 0.02 |
| 6q#92464_92472    | 6  | 150450577-150502692 | 52116   | ULBP3                                            | 0 | 0.41 | 0.00 | 0.02 |
| 6q#92481_92485    | 6  | 150606240-150641213 | 34974   | PPP1R14C                                         | 0 | 0.41 | 0.00 | 0.02 |
| 17p#194400_194417 | 17 | 13786136-14014324   | 228189  | AK123100, COX10                                  | 0 | 0.41 | 0.00 | 0.02 |
| 17p#194364_194373 | 17 | 12972864-13286144   | 313281  |                                                  | 0 | 0.41 | 0.00 | 0.02 |
| 17p#194127_194131 | 17 | 10111950-10149523   | 37574   | MYH13                                            | 0 | 0.41 | 0.00 | 0.02 |
| 17p#194347_194363 | 17 | 12749735-12921252   | 171518  | KIAA0672, ELAC2                                  | 0 | 0.41 | 0.00 | 0.02 |
| 2p#24377_24529    | 2  | 63852424-65580376   | 1727953 | HSPC159, BC036082, AFTIPHILIN, BC041356, SERTAF  | 0 | 0.41 | 0.00 | 0.02 |
| 2p#24564_24585    | 2  | 65931236-66113670   | 182435  | FLJ16124                                         | 0 | 0.41 | 0.00 | 0.02 |
| 22q#225017_225040 | 22 | 46213854-46494462   | 280609  | FLJ46257, AK093107                               | 0 | 0.41 | 0.00 | 0.02 |
| 22q#221294_221298 | 22 | 15523118-15563731   | 40614   | AK001299                                         | 0 | 0.41 | 0.00 | 0.02 |
| 22q#221299_221301 | 22 | 15579496-15630962   | 51467   |                                                  | 0 | 0.41 | 0.00 | 0.02 |
| 22q#225041_225086 | 22 | 46509294-47026340   | 517047  | AK093107, LOC388915                              | 0 | 0.41 | 0.00 | 0.02 |
| 3q#52099_52116    | 3  | 177929805-178247856 | 318052  | BX640629, TBL1XR1                                | 0 | 0.41 | 0.00 | 0.02 |
| 3q#53707_53719    | 3  | 197220266-197363137 | 142872  | TFRC, FLJ25996                                   | 0 | 0.41 | 0.00 | 0.02 |
| 3q#53882_53950    | 3  | 198753910-199383538 | 629629  | D86979, FYT1D1, LRCH3, AK055819, IQCG, LMLN, ALB | 0 | 0.41 | 0.00 | 0.02 |
| 14q#170685_170710 | 14 | 29258368-29451984   | 193617  | PRKD1                                            | 0 | 0.41 | 0.00 | 0.02 |
| 14q#170639_170684 | 14 | 28396216-29252295   | 856080  | PRKD1                                            | 0 | 0.41 | 0.00 | 0.02 |
| 14q#170711_170749 | 14 | 29462365-30082541   | 620177  | PRKD1, BC034639                                  | 0 | 0.41 | 0.00 | 0.02 |
| 17p#194848_194936 | 17 | 19371812-20551151   | 1179340 | A2, FLJ31196, BX648861, ALDH3A1, ULK2, AKAP10, A | 0 | 0.41 | 0.00 | 0.02 |
| 17p#194835_194847 | 17 | 19223764-19357768   | 134005  | MAPK7, MFAP4, ZNF179                             | 0 | 0.41 | 0.00 | 0.02 |
| 17p#194937_194943 | 17 | 20569693-20607766   | 38074   |                                                  | 0 | 0.41 | 0.00 | 0.02 |
| 14q#170618_170638 | 14 | 28125412-28375291   | 249880  | AK124763, FOXG1B, BX248251                       | 0 | 0.41 | 0.00 | 0.02 |
| 14q#170750_170751 | 14 | 30090617-30097883   | 7267    |                                                  | 0 | 0.41 | 0.00 | 0.02 |
| 17p#194824_194834 | 17 | 19174477-19217289   | 42813   | EPN2, EPPB9, CR606056                            | 0 | 0.41 | 0.00 | 0.02 |
| 14q#170610_170617 | 14 | 27921570-28093210   | 171641  |                                                  | 0 | 0.41 | 0.00 | 0.02 |
| 17p#194822_194823 | 17 | 19154096-19162563   | 8468    | EPN2                                             | 0 | 0.41 | 0.00 | 0.02 |
| 14q#170752_170755 | 14 | 30112263-30140992   | 28730   | KIAA1333                                         | 0 | 0.41 | 0.00 | 0.02 |
| 22q#221579_221585 | 22 | 18135213-18172199   | 36987   | TBX1, AB051432, GNB1L                            | 0 | 0.41 | 0.00 | 0.02 |
| 22q#221586_221639 | 22 | 18179221-18487228   | 308008  | RD2, COMT, ARVCF, CR591827, C22orf25, DGCR8, HT  | 0 | 0.41 | 0.00 | 0.02 |
| 22q#225308_225309 | 22 | 49015853-49019515   | 3663    | AK056543                                         | 0 | 0.41 | 0.00 | 0.02 |
| 22q#225288_225299 | 22 | 48929857-48973995   | 44139   | PP2447, SELO, TUBGCP6                            | 0 | 0.41 | 0.00 | 0.02 |
| 22q#221565_221567 | 22 | 18074295-18081656   | 7362    | Sep-05                                           | 0 | 0.41 | 0.00 | 0.02 |
| 22q#225310_225314 | 22 | 49025025-49070652   | 45628   | AB002313                                         | 0 | 0.41 | 0.00 | 0.02 |
| 22q#225300_225307 | 22 | 48978668-49009365   | 30698   | TUBGCP6, HDAC10, MAPK12, U53442, MAPK11          | 0 | 0.41 | 0.00 | 0.02 |
| 10p#128239_128289 | 10 | 1925635-2593551     | 667917  | BC055423                                         | 0 | 0.41 | 0.00 | 0.02 |
| 22q#221640_221644 | 22 | 18491339-18513633   | 22295   | ZDHHC8                                           | 0 | 0.41 | 0.00 | 0.02 |
| 7p#94164_94169    | 7  | 140213-204768       | 64556   |                                                  | 0 | 0.41 | 0.00 | 0.02 |
| 7p#94170_94174    | 7  | 224840-265508       | 40669   | AK094924                                         | 0 | 0.41 | 0.00 | 0.02 |
| 12q#160831_160852 | 12 | 119993121-120166900 | 173780  | P2RX7, P2RX4, CAMKK2                             | 0 | 0.41 | 0.00 | 0.02 |
| 12q#160991_161042 | 12 | 121422919-121836523 | 413605  | J11021, KNTC1, AK122659, GPR109A, GPR109B, GPR   | 0 | 0.41 | 0.00 | 0.02 |
| 19p#208433_208436 | 19 | 16808316-16845970   | 37655   | SIN3B                                            | 0 | 0.41 | 0.00 | 0.02 |
| 20p#214198_214252 | 20 | 18859151-19536838   | 677688  | SLC24A3                                          | 0 | 0.41 | 0.00 | 0.02 |
| 20p#214426_214460 | 20 | 21573020-22316382   | 743363  | PAX1, BC038192, CR627206                         | 0 | 0.41 | 0.00 | 0.02 |
| 4q#59755_59763    | 4  | 84024672-84097271   | 72600   | SCD5, SEC31L1                                    | 0 | 0.41 | 0.00 | 0.02 |



|            |        |    |                     |         |  |                                                     |   |      |      |      |
|------------|--------|----|---------------------|---------|--|-----------------------------------------------------|---|------|------|------|
| 4q#60697   | 60703  | 4  | 94340238-94397444   | 57207   |  | GRID2                                               | 0 | 0.41 | 0.00 | 0.02 |
| 4q#59698   | 59701  | 4  | 83365386-83470119   | 104734  |  |                                                     | 0 | 0.41 | 0.00 | 0.02 |
| 4q#59752   | 59754  | 4  | 83995737-84016079   | 20343   |  | SCD5                                                | 0 | 0.41 | 0.00 | 0.02 |
| 14q#173114 | 173290 | 14 | 58123103-59937539   | 1814437 |  | #orf100, AK094488, RTN1, AK128037, AK095489, C14orf | 0 | 0.41 | 0.00 | 0.02 |
| 14q#173303 | 173318 | 14 | 60054688-60223745   | 169058  |  | SIX1                                                | 0 | 0.41 | 0.00 | 0.02 |
| 14q#173032 | 173037 | 14 | 57388012-57440733   | 52722   |  |                                                     | 0 | 0.41 | 0.00 | 0.02 |
| 14q#173062 | 173067 | 14 | 57716720-57765608   | 48889   |  | ACTR10                                              | 0 | 0.41 | 0.00 | 0.02 |
| 7p#96934   | 97039  | 7  | 31733718-32728366   | 994649  |  | AK091734, LSM5, KIAA0241, BC027724, LOC441208, A    | 0 | 0.41 | 0.00 | 0.02 |
| 7p#97085   | 97121  | 7  | 33120731-33404981   | 284251  |  | PTHB1                                               | 0 | 0.41 | 0.00 | 0.02 |
| 7p#96788   | 96814  | 7  | 30263253-30502884   | 239632  |  | 7orf24, G36719, BC041636, AK096687, GARS, CRHR2,    | 0 | 0.41 | 0.00 | 0.02 |
| 7p#96861   | 96933  | 7  | 30894548-31726915   | 832368  |  | R1, BX538156, NEUROD6, LOC223075, C7orf16, U403,    | 0 | 0.41 | 0.00 | 0.02 |
| 7p#95070   | 95077  | 7  | 8628908-8861945     | 233038  |  |                                                     | 0 | 0.41 | 0.00 | 0.02 |
| 7p#95108   | 95216  | 7  | 9490942-11030317    | 1539376 |  | AY423624, BX648837, BC002644, NDUFA4, PHF14         | 0 | 0.41 | 0.00 | 0.02 |
| 7p#95285   | 95609  | 7  | 11922200-16374470   | 4452271 |  | 797, AB067492, SCIN, BC043260, ARL4A, ETV1, DGKE    | 0 | 0.41 | 0.00 | 0.02 |
| 7p#97040   | 97084  | 7  | 32735699-33109427   | 373729  |  | LOC441212, BC027724, FKBP9, NT5C3, RP9, PTHB1       | 0 | 0.41 | 0.00 | 0.02 |
| 7p#97122   | 97193  | 7  | 33410350-34251232   | 840883  |  | PTHB1, AK000719, AK000152, BMPER, AAA1              | 0 | 0.41 | 0.00 | 0.02 |
| 7p#96815   | 96819  | 7  | 30512433-30553062   | 40630   |  | AF011406                                            | 0 | 0.41 | 0.00 | 0.02 |
| 7p#96843   | 96860  | 7  | 30737383-30887652   | 150270  |  | AQP1, GHRHR, ADCYAP1R1                              | 0 | 0.41 | 0.00 | 0.02 |
| 7p#94892   | 94900  | 7  | 6832024-7022565     | 190542  |  |                                                     | 0 | 0.41 | 0.00 | 0.02 |
| 7p#95054   | 95069  | 7  | 8460704-8597667     | 136964  |  | NXPH1                                               | 0 | 0.41 | 0.00 | 0.02 |
| 7p#95610   | 95612  | 7  | 16392787-16412816   | 20030   |  | ANKMY2                                              | 0 | 0.41 | 0.00 | 0.02 |
| 7p#96721   | 96787  | 7  | 29609033-30245974   | 636942  |  | 8, CR598838, BC053990, AK023180, AK096533, EILs1,   | 0 | 0.41 | 0.00 | 0.02 |
| 20p#214253 | 214417 | 20 | 19543450-21428822   | 1885373 |  | NAT5, CRNKL1, C20orf26, INSM1, AK002211, C20orf74   | 0 | 0.41 | 0.00 | 0.02 |
| 20p#214423 | 214425 | 20 | 21488689-21530844   | 42156   |  |                                                     | 0 | 0.41 | 0.00 | 0.02 |
| 6q#86578   | 86599  | 6  | 69162419-69508747   | 346329  |  | AB011122, BAI3                                      | 0 | 0.41 | 0.00 | 0.02 |
| 6q#88539   | 88558  | 6  | 98046692-98344021   | 297330  |  | AK091365                                            | 0 | 0.41 | 0.00 | 0.02 |
| 6q#87355   | 87356  | 6  | 79035891-79058603   | 22713   |  |                                                     | 0 | 0.41 | 0.00 | 0.02 |
| 6q#91819   | 91825  | 6  | 14277918-142828850  | 50933   |  | GPR126                                              | 0 | 0.41 | 0.00 | 0.02 |
| 6q#87351   | 87354  | 6  | 78842734-78983335   | 140602  |  |                                                     | 0 | 0.41 | 0.00 | 0.02 |
| 6q#87357   | 87359  | 6  | 79079988-79133951   | 53964   |  |                                                     | 0 | 0.41 | 0.00 | 0.02 |
| 6q#87374   | 87378  | 6  | 79610035-79651862   | 41828   |  | IRAK1BP1                                            | 0 | 0.41 | 0.00 | 0.02 |
| 6q#87380   | 87418  | 6  | 79665030-80113253   | 448224  |  | AK098678, PHIP, BC036479, HMGN3                     | 0 | 0.41 | 0.00 | 0.02 |
| 6q#91826   | 91835  | 6  | 142846231-143012075 | 165845  |  | AK055933                                            | 0 | 0.41 | 0.00 | 0.02 |
| 4q#59360   | 59376  | 4  | 79150062-79347304   | 197243  |  | MRPL1, BC006366, FRAS1                              | 0 | 0.41 | 0.00 | 0.02 |
| 22q#222418 | 222439 | 22 | 25163875-25273838   | 109964  |  | ASPHD2, AK097157, HPS4, LOC402055, TFIP11, TPST2    | 0 | 0.41 | 0.00 | 0.02 |
| 22q#222461 | 222475 | 22 | 25488649-25840030   | 351382  |  | BC036876                                            | 0 | 0.41 | 0.00 | 0.02 |
| 18q#203332 | 203384 | 18 | 34854325-35704673   | 850349  |  | AK090603                                            | 0 | 0.41 | 0.00 | 0.02 |
| 18q#202561 | 202562 | 18 | 24048647-24090984   | 32338   |  |                                                     | 0 | 0.41 | 0.00 | 0.02 |
| 22q#222285 | 222417 | 22 | 24071802-25157307   | 1085506 |  | 2, BC004918, ADRBK2, BC021221, MYO18B, SEZ6L, AF    | 0 | 0.41 | 0.00 | 0.02 |
| 22q#222440 | 222460 | 22 | 25282216-25454721   | 172506  |  | TPST2, CRYBB1, CRYBA4, AK098833, AK026502           | 0 | 0.41 | 0.00 | 0.02 |
| 18q#202328 | 202342 | 18 | 21112518-21364498   | 251981  |  | ZNF521                                              | 0 | 0.41 | 0.00 | 0.02 |
| 18q#202522 | 202560 | 18 | 23603928-24030171   | 426244  |  | CDH2                                                | 0 | 0.41 | 0.00 | 0.02 |
| 22q#222269 | 222284 | 22 | 23932760-24059964   | 127205  |  | CRYBB2                                              | 0 | 0.41 | 0.00 | 0.02 |
| 18q#202150 | 202299 | 18 | 19338369-20801000   | 1462632 |  | IKRD29, LAMA3, C18orf17, CABYR, OSBPL1A, IMPACT     | 0 | 0.41 | 0.00 | 0.02 |
| 22q#222144 | 222150 | 22 | 22918315-22968491   | 50177   |  | GGTLA1                                              | 0 | 0.41 | 0.00 | 0.02 |
| 4q#64749   | 64753  | 4  | 153966335-154040181 | 73847   |  |                                                     | 0 | 0.41 | 0.00 | 0.02 |
| 19p#207637 | 207645 | 19 | 10191584-10244151   | 52568   |  | EDG5, MRPL4, ICAM1                                  | 0 | 0.41 | 0.00 | 0.02 |
| 22q#222137 | 222143 | 22 | 22891200-22909237   | 18038   |  | CABIN1, SUSD2                                       | 0 | 0.41 | 0.00 | 0.02 |
| 4q#64715   | 64748  | 4  | 153655772-153956638 | 300867  |  | FBXW7, AL137273, FLJ32028                           | 0 | 0.41 | 0.00 | 0.02 |
| 22q#225215 | 225218 | 22 | 48413915-48442760   | 28846   |  |                                                     | 0 | 0.41 | 0.00 | 0.02 |
| 22q#225220 | 225221 | 22 | 48468269-48483401   | 15133   |  |                                                     | 0 | 0.41 | 0.00 | 0.02 |
| 12q#158475 | 158500 | 12 | 93867567-94085222   | 217656  |  | NDUFA12, NR2C1, FGD6                                | 0 | 0.41 | 0.00 | 0.02 |
| 21q#220462 | 220472 | 21 | 41096875-41219296   | 122422  |  | DSCAM                                               | 0 | 0.41 | 0.00 | 0.02 |
| 22q#225182 | 225205 | 22 | 48119838-48325679   | 205842  |  | BC033837, FLJ44385                                  | 0 | 0.41 | 0.00 | 0.02 |
| 22q#225208 | 225214 | 22 | 48337532-48393849   | 56318   |  | LOC348645                                           | 0 | 0.41 | 0.00 | 0.02 |

|                   |    |                     |         |                                                    |  |  |   |      |      |      |
|-------------------|----|---------------------|---------|----------------------------------------------------|--|--|---|------|------|------|
| 17p#195042_195043 | 17 | 21843143-21857788   | 14646   |                                                    |  |  | 0 | 0.41 | 0.00 | 0.02 |
| 17p#195044_195046 | 17 | 21867029-21915659   | 48631   |                                                    |  |  | 0 | 0.41 | 0.00 | 0.02 |
| 7p#96079_96286    | 7  | 22734501-25029193   | 2294693 | 5F2BP3, TRA2A, LOC90693, MGC72075, STK31, AK057    |  |  | 0 | 0.41 | 0.00 | 0.02 |
| 12q#157029_157057 | 12 | 70959273-71179714   | 220442  | TRHDE                                              |  |  | 0 | 0.41 | 0.00 | 0.02 |
| 7p#94711_94716    | 7  | 5058944-5134508     | 75565   | BC009270, SLC29A4, AB058759                        |  |  | 0 | 0.41 | 0.00 | 0.02 |
| 3q#53667_53670    | 3  | 196613685-196642135 | 28451   | CENTB2                                             |  |  | 0 | 0.41 | 0.00 | 0.02 |
| 7p#95990_96032    | 7  | 21631073-22159357   | 528285  | DNAH11, CDCA7L, D87467, AL833195                   |  |  | 0 | 0.41 | 0.00 | 0.02 |
| 7p#96041_96078    | 7  | 22283755-22719029   | 435275  | C066301, AK123961, BC039682, BC042871, IL6, TOMM   |  |  | 0 | 0.41 | 0.00 | 0.02 |
| 7p#96287_96288    | 7  | 25033965-25040551   | 6587    | C7orf9                                             |  |  | 0 | 0.41 | 0.00 | 0.02 |
| 17p#195047_195052 | 17 | 21956831-22142572   | 185742  |                                                    |  |  | 0 | 0.41 | 0.00 | 0.02 |
| 3q#52631_52647    | 3  | 185338228-185438801 | 100574  | EIF2B5, DVL3, AP2M1, ABCF3, BC001200               |  |  | 0 | 0.41 | 0.00 | 0.02 |
| 3q#52682_52685    | 3  | 185590263-185608003 | 17741   | CHRD                                               |  |  | 0 | 0.41 | 0.00 | 0.02 |
| 3q#52595_52630    | 3  | 185096086-185337351 | 241266  | 57243, ABCC5, HTR3D, HTR3C, HTR3E, AY956761, EIF   |  |  | 0 | 0.41 | 0.00 | 0.02 |
| 3q#52686_52701    | 3  | 185614757-185810144 | 195388  | EPHB3                                              |  |  | 0 | 0.41 | 0.00 | 0.02 |
| 3q#52584_52585    | 3  | 185013005-185019194 | 6190    | YEATS2, MAP6D1                                     |  |  | 0 | 0.41 | 0.00 | 0.02 |
| 3q#52702_52712    | 3  | 185828022-185976862 | 148841  | MAGEF1, BC050282                                   |  |  | 0 | 0.41 | 0.00 | 0.02 |
| 3q#52587_52594    | 3  | 185031383-185090571 | 59189   | PARL                                               |  |  | 0 | 0.41 | 0.00 | 0.02 |
| 3q#51803_52098    | 3  | 174165437-177913683 | 3748247 | SPATA16, NLGN1, AJ607399, AJ607396, NAALADL2       |  |  | 0 | 0.41 | 0.00 | 0.02 |
| 3q#52117_52583    | 3  | 178265404-185002049 | 6736646 | NDUFB5, USP13, PEX5L, TTC14, AY358762, AL12212     |  |  | 0 | 0.41 | 0.00 | 0.02 |
| 3q#52713_52909    | 3  | 185995089-187864857 | 1869769 | 41A, LIPH, SENP2, IGF2BP2, SFRS10, BX640843, ETV5  |  |  | 0 | 0.41 | 0.00 | 0.02 |
| 3q#53606_53666    | 3  | 196048946-196608485 | 559540  | C3orf21, CENTB2                                    |  |  | 0 | 0.41 | 0.00 | 0.02 |
| 3q#53720_53881    | 3  | 197375520-198747604 | 1372085 | 37, RNF168, AL833140, WDR53, AK025697, LRRRC33, C  |  |  | 0 | 0.41 | 0.00 | 0.02 |
| 16p#189043_189047 | 16 | 32208242-32525764   | 317523  |                                                    |  |  | 0 | 0.41 | 0.00 | 0.02 |
| 20p#213994_214027 | 20 | 16466944-17138245   | 671302  | C20orf23, SNRFB2, OTOR                             |  |  | 0 | 0.41 | 0.00 | 0.02 |
| 20p#214163_214197 | 20 | 18537675-18846015   | 308341  | HARS2, HSPC072, C20orf79, CR600291                 |  |  | 0 | 0.41 | 0.00 | 0.02 |
| 20p#214461_214475 | 20 | 22341339-22540537   | 199199  | BC033532, FOXA2                                    |  |  | 0 | 0.41 | 0.00 | 0.02 |
| 3q#53140_53182    | 3  | 190165712-190781361 | 615650  | BX641108, FAM79B                                   |  |  | 0 | 0.41 | 0.00 | 0.02 |
| 6p#83775_83779    | 6  | 32672983-32712016   | 39034   | BC003593                                           |  |  | 0 | 0.41 | 0.00 | 0.02 |
| 20p#214476_214597 | 20 | 22576208-23979374   | 1403167 | 443, NXT1, AK056477, ZNF336, NAPB, CSTL1, CST11, C |  |  | 0 | 0.41 | 0.00 | 0.02 |
| 11p#142578_142620 | 11 | 39727879-40398786   | 670908  | LRRRC4C, DQ084202                                  |  |  | 0 | 0.41 | 0.00 | 0.02 |
| 11p#142948_142955 | 11 | 45276021-45357396   | 81376   | FLJ41423                                           |  |  | 0 | 0.41 | 0.00 | 0.02 |
| 4q#59489_59507    | 4  | 80524938-80738556   | 213619  | BC036848, CR605070, GK2                            |  |  | 0 | 0.41 | 0.00 | 0.02 |
| 11p#142922_142947 | 11 | 44949876-45267033   | 317158  | PRDM11, AK024304, SYT13                            |  |  | 0 | 0.41 | 0.00 | 0.02 |
| 3p#40789_40816    | 3  | 34481621-35076243   | 594623  | BC035904                                           |  |  | 0 | 0.41 | 0.00 | 0.02 |
| 3p#40871_40878    | 3  | 35782771-35874811   | 92041   | ARPP-21                                            |  |  | 0 | 0.41 | 0.00 | 0.02 |
| 3p#40777_40788    | 3  | 34224937-34440423   | 215487  |                                                    |  |  | 0 | 0.41 | 0.00 | 0.02 |
| 3p#40817_40820    | 3  | 35088216-35129151   | 40936   | BC035904                                           |  |  | 0 | 0.41 | 0.00 | 0.02 |
| 11q#146751_146753 | 11 | 86462145-86489981   | 27837   | TMEM135                                            |  |  | 0 | 0.41 | 0.00 | 0.02 |
| 11p#140711_140721 | 11 | 13863249-13991224   | 127976  | SPON1                                              |  |  | 0 | 0.41 | 0.00 | 0.02 |
| 11p#140833_140848 | 11 | 15095766-15231610   | 135845  | AB236159, INSC                                     |  |  | 0 | 0.41 | 0.00 | 0.02 |
| 11p#140930_140944 | 11 | 16615748-16791339   | 175592  | AK097455, C11orf58, PLEKHA7                        |  |  | 0 | 0.41 | 0.00 | 0.02 |
| 10p#128346_128352 | 10 | 3272797-3362328     | 89532   | BC037918                                           |  |  | 0 | 0.41 | 0.00 | 0.02 |
| 11p#140945_140953 | 11 | 16803870-16860385   | 56516   | PLEKHA7                                            |  |  | 0 | 0.41 | 0.00 | 0.02 |
| 11p#140973_140997 | 11 | 17052604-17246426   | 193823  | RPS13, BX648778, PIK3C2A, BC031681, AK097398       |  |  | 0 | 0.41 | 0.00 | 0.02 |
| 11p#141016_141027 | 11 | 17424701-17511443   | 86743   | ABCC8, USH1C                                       |  |  | 0 | 0.41 | 0.00 | 0.02 |
| 11p#141128_141179 | 11 | 18390799-18915930   | 525132  | 6A, TSG101, UEV3, AK097654, SPTY2D1, TMEM86A, IQ   |  |  | 0 | 0.41 | 0.00 | 0.02 |
| 10p#128330_128345 | 10 | 3114061-3258498     | 144438  | PFKP, PITRM1                                       |  |  | 0 | 0.41 | 0.00 | 0.02 |
| 4q#64608_64714    | 4  | 152195402-153641798 | 1446397 | SH3D19, ESSPL, AK125363, AB019410, PET112L, BCC    |  |  | 0 | 0.41 | 0.00 | 0.02 |
| 19p#208630_208657 | 19 | 18359525-18550518   | 190994  | C25, SSBP4, ELL, BX648739, FKBP8, MGC2749, UBA5    |  |  | 0 | 0.41 | 0.00 | 0.02 |
| 11p#140954_140972 | 11 | 16878891-17051922   | 173032  | PLEKHA7                                            |  |  | 0 | 0.41 | 0.00 | 0.02 |
| 22q#225315_225327 | 22 | 49077062-49173598   | 96537   | SAPS2                                              |  |  | 0 | 0.41 | 0.00 | 0.02 |
| 10p#128290_128329 | 10 | 2606778-3104447     | 497670  | PFKP                                               |  |  | 0 | 0.41 | 0.00 | 0.02 |
| 7p#94213_94255    | 7  | 803607-1059952      | 256346  | MGC11257, ZFAND2A                                  |  |  | 0 | 0.41 | 0.00 | 0.02 |
| 22q#225285_225287 | 22 | 48919436-48926446   | 7011    | PANX2                                              |  |  | 0 | 0.41 | 0.00 | 0.02 |
| 7p#94175_94195    | 7  | 271646-675521       | 403876  | FAM20C, FLJ20397, BC010850, AK127690, UNC84A       |  |  | 0 | 0.41 | 0.00 | 0.02 |

|                   |    |                     |         |                                                  |   |      |      |      |
|-------------------|----|---------------------|---------|--------------------------------------------------|---|------|------|------|
| 7p#94196_94201    | 7  | 681992-709220       | 27229   | UNC84A, C7orf20                                  | 0 | 0.41 | 0.00 | 0.02 |
| 7p#94202_94212    | 7  | 715855-798684       | 82830   | CENTA1, AK130822, LOC90639, CYP2W1               | 0 | 0.41 | 0.00 | 0.02 |
| 22q#225222_225224 | 22 | 48488857-48502301   | 13445   | BRD1                                             | 0 | 0.41 | 0.00 | 0.02 |
| 22q#225225_225250 | 22 | 48508210-48667071   | 158862  | BRD1, AK058075, ZBED4, ALG12, CRELD2             | 0 | 0.41 | 0.00 | 0.02 |
| 22q#225269_225279 | 22 | 48825970-48881933   | 55964   | MLC1, MOV10L1                                    | 0 | 0.41 | 0.00 | 0.02 |
| 22q#225281_225284 | 22 | 48894630-48916396   | 21767   | MOV10L1, PANX2                                   | 0 | 0.41 | 0.00 | 0.02 |
| 6q#89349_89404    | 6  | 110102148-110752146 | 649999  | 199, KIAA0274, GPR6, WASF1, CDC40, BC018059, AK1 | 0 | 0.41 | 0.00 | 0.02 |
| 6q#89456_89553    | 6  | 111292469-112159185 | 866717  | SLC16A10, KIAA1919, AB067506, AK025312, REV3L, B | 0 | 0.41 | 0.00 | 0.02 |
| 6q#89554_89561    | 6  | 112164891-11232522  | 67632   | FYN                                              | 0 | 0.41 | 0.00 | 0.02 |
| 2q#37094_37101    | 2  | 233105675-233146177 | 40503   |                                                  | 0 | 0.41 | 0.00 | 0.02 |
| 17p#194156_194166 | 17 | 10375261-10476844   | 101584  | MYH2, AK097500, MYH3                             | 0 | 0.41 | 0.00 | 0.02 |
| 17p#194569_194572 | 17 | 16263648-16282302   | 18655   | TRPV2                                            | 0 | 0.41 | 0.00 | 0.02 |
| 17p#194775_194777 | 17 | 18230762-18265608   | 34847   | AK125954, AK127974                               | 0 | 0.41 | 0.00 | 0.02 |
| 17p#194394_194399 | 17 | 13648454-13761836   | 113383  |                                                  | 0 | 0.41 | 0.00 | 0.02 |
| 17p#194374_194393 | 17 | 13320996-13633029   | 312034  | HS3ST3A1, AK123263                               | 0 | 0.41 | 0.00 | 0.02 |
| 17p#194562_194568 | 17 | 16211442-16253683   | 42242   |                                                  | 0 | 0.41 | 0.00 | 0.02 |
| 17p#194573_194582 | 17 | 16286002-16356824   | 70823   | C17orf45, C17orf76                               | 0 | 0.41 | 0.00 | 0.02 |
| 17p#194549_194561 | 17 | 16087690-16205184   | 117495  | PIGL, AK023469, PRR6                             | 0 | 0.41 | 0.00 | 0.02 |
| 17p#194596_194603 | 17 | 16483230-16663548   | 180319  | ZNF624, AK125971, BC039345, CR597597             | 0 | 0.41 | 0.00 | 0.02 |
| 2q#37103_37108    | 2  | 233164808-233191566 | 26759   | ECEL1                                            | 0 | 0.41 | 0.00 | 0.02 |
| 2q#37210_37257    | 2  | 234073311-234496935 | 423625  | DGKD, USP40, UGT1A8                              | 0 | 0.41 | 0.00 | 0.02 |
| 2q#37258_37294    | 2  | 234502862-234832129 | 329268  | BC042133, DKFZp762E1312, TRPM8, SPP2, AK096136   | 0 | 0.41 | 0.00 | 0.02 |
| 17p#194132_194155 | 17 | 10160059-10367276   | 207218  | MYH13, MYH8, AK097500, MYH4, MYH1, MYH2          | 0 | 0.41 | 0.00 | 0.02 |
| 17p#194167_194193 | 17 | 10485107-10781504   | 296398  | YH3, SCO1, C17orf48, LOC388335, AK091139, AK0215 | 0 | 0.41 | 0.00 | 0.02 |
| 17p#194542_194548 | 17 | 16015802-16078118   | 62317   | NCOR1, PIGL                                      | 0 | 0.41 | 0.00 | 0.02 |
| 17p#194583_194595 | 17 | 16370645-16473518   | 102874  | ZNF287, ZNF624                                   | 0 | 0.41 | 0.00 | 0.02 |
| 17p#194194_194206 | 17 | 10812032-11102231   | 290200  | FLJ45455                                         | 0 | 0.41 | 0.00 | 0.02 |
| 17p#194535_194541 | 17 | 15942357-16001094   | 58738   | NCOR1                                            | 0 | 0.41 | 0.00 | 0.02 |
| 17p#194604_194608 | 17 | 16698289-16744737   | 46449   |                                                  | 0 | 0.41 | 0.00 | 0.02 |
| 2q#34332_34443    | 2  | 202220862-203253880 | 1033019 | P4, ALS2, ALS2CR7, FZD7, AK096380, BC040292, AB0 | 0 | 0.41 | 0.00 | 0.02 |
| 2q#34444_34588    | 2  | 203263850-204812086 | 1548237 | 2CR8, ALS2CR16, AK130065, NBEAL1, CYP20A1, BC0   | 0 | 0.41 | 0.00 | 0.02 |
| 14q#173319_173377 | 14 | 60239167-60758962   | 519796  | SIX4, MNAT1, TRMT5, SLC38A6, BC050349            | 0 | 0.41 | 0.00 | 0.02 |
| 17p#194944_194956 | 17 | 20618474-20764828   | 146355  | MGC87631                                         | 0 | 0.41 | 0.00 | 0.02 |
| 19q#211599_211606 | 19 | 56770664-56840401   | 69738   | ZNF175, BC034798, SIGLEC5, AY358369              | 0 | 0.41 | 0.00 | 0.02 |
| 11q#144368_144371 | 11 | 62667335-62688246   | 20912   | MGC34821, LOC387601                              | 0 | 0.41 | 0.00 | 0.02 |
| 11q#144374_144377 | 11 | 62741497-62770946   | 29450   | LOC387601                                        | 0 | 0.41 | 0.00 | 0.02 |
| 22q#221574_221578 | 22 | 18114546-18131546   | 17001   | TBX1                                             | 0 | 0.41 | 0.00 | 0.02 |
| 22q#221568_221569 | 22 | 18084669-18091366   | 6698    | Sep-05                                           | 0 | 0.41 | 0.00 | 0.02 |
| 22q#221570_221573 | 22 | 18096163-18111236   | 15074   |                                                  | 0 | 0.41 | 0.00 | 0.02 |
| 22q#221654_221662 | 22 | 18591686-18634557   | 42872   | RTN4R, X91348                                    | 0 | 0.41 | 0.00 | 0.02 |
| 7p#96820_96842    | 7  | 30562365-30732345   | 169981  | INMT, FLJ22374, AQP1                             | 0 | 0.41 | 0.00 | 0.02 |
| 19q#211607_211609 | 19 | 56850433-56864368   | 13936   |                                                  | 0 | 0.41 | 0.00 | 0.02 |
| 11q#144224_144235 | 11 | 61689434-61761376   | 71943   | SCGB1D1, SCGB2A1                                 | 0 | 0.41 | 0.00 | 0.02 |
| 22q#221648_221653 | 22 | 18549547-18583846   | 34300   | AK092552, AK057137                               | 0 | 0.41 | 0.00 | 0.02 |
| 22q#221645_221647 | 22 | 18518630-18539139   | 20510   |                                                  | 0 | 0.41 | 0.00 | 0.02 |
| 11q#143849_143850 | 11 | 58489375-58495739   | 6365    | AK091446                                         | 0 | 0.41 | 0.00 | 0.02 |
| 11q#144236_144238 | 11 | 61766567-61778534   | 11968   | SCGB1D2                                          | 0 | 0.41 | 0.00 | 0.02 |
| 19p#208437_208448 | 19 | 16851341-16929750   | 78410   | SIN3B, AF055917, CPAMD8                          | 0 | 0.41 | 0.00 | 0.02 |
| 19p#208527_208547 | 19 | 17563386-17762355   | 198970  | AB028955, BPY2IP1, BC028021, FCHO1               | 0 | 0.41 | 0.00 | 0.02 |
| 11p#142562_142572 | 11 | 39209713-39537711   | 327999  |                                                  | 0 | 0.41 | 0.00 | 0.02 |
| 11p#142526_142553 | 11 | 37986858-38947224   | 960367  |                                                  | 0 | 0.41 | 0.00 | 0.02 |
| 11p#142573_142574 | 11 | 39561636-39589725   | 28090   |                                                  | 0 | 0.41 | 0.00 | 0.02 |
| 11p#142424_142438 | 11 | 36050077-36219077   | 169001  | LDLRAD3, BC042754                                | 0 | 0.41 | 0.00 | 0.02 |
| 11q#146497_146509 | 11 | 83763421-83857536   | 94116   | DLG2                                             | 0 | 0.41 | 0.00 | 0.02 |
| 11q#146637_146676 | 11 | 85180436-85666770   | 486335  | AB046817, CCDC83, PICALM, EED                    | 0 | 0.41 | 0.00 | 0.02 |

|                   |    |                     |         |                                                    |   |      |      |      |
|-------------------|----|---------------------|---------|----------------------------------------------------|---|------|------|------|
| 7p#94980_94992    | 7  | 7784903-7886377     | 101475  | GLCC1                                              | 0 | 0.41 | 0.00 | 0.02 |
| 7p#95217_95284    | 7  | 11060592-11893197   | 832606  | BC040327, AB023177, AK092252                       | 0 | 0.41 | 0.00 | 0.02 |
| 7p#96501_96588    | 7  | 27480196-28361167   | 880972  | G36716, TAX1BP1, JAZF1, CREB5                      | 0 | 0.41 | 0.00 | 0.02 |
| 7p#96626_96720    | 7  | 28632493-29583578   | 951086  | A0644, AK124888, CPVL, AK124472, CHN2, BC038570,   | 0 | 0.41 | 0.00 | 0.02 |
| 7p#94889_94890    | 7  | 6723988-6798134     | 74147   |                                                    | 0 | 0.41 | 0.00 | 0.02 |
| 7p#94886_94888    | 7  | 6613548-6644183     | 30636   | C7orf28B                                           | 0 | 0.41 | 0.00 | 0.02 |
| 7p#94901_94979    | 7  | 7034527-7778814     | 744288  | C1GALT1, COL28A1, FLJ20323, RPA3, CR590623         | 0 | 0.41 | 0.00 | 0.02 |
| 7p#94993_95053    | 7  | 7895811-8455502     | 559692  | GLCC1, ICA1, CR624517, NXPH1                       | 0 | 0.41 | 0.00 | 0.02 |
| 7p#96289_96314    | 7  | 25054371-25600906   | 546536  | BX648247, AK057379                                 | 0 | 0.41 | 0.00 | 0.02 |
| 19q#212340_212374 | 19 | 62759813-62995549   | 235737  | 134, AB209847, ZNF211, ZSCAN4, ZNF551, BC041615,   | 0 | 0.41 | 0.00 | 0.02 |
| 19q#212375_212433 | 19 | 63005638-63497622   | 491985  | 256, C19orf18, ZNF606, ZSCAN1, ZNF135, BX647775, A | 0 | 0.41 | 0.00 | 0.02 |
| 2q#352225_35239   | 2  | 212552332-212654812 | 102481  | ERBB4                                              | 0 | 0.41 | 0.00 | 0.02 |
| 15q#179161_179169 | 15 | 33927829-34038510   | 110682  | AK096400                                           | 0 | 0.41 | 0.00 | 0.02 |
| 15q#179177_179190 | 15 | 34119180-34259899   | 140720  | AK096400                                           | 0 | 0.41 | 0.00 | 0.02 |
| 4q#59925_60007    | 4  | 86022052-87048925   | 1026874 | WDFY3, C4orf12, ARHGAP24                           | 0 | 0.41 | 0.00 | 0.02 |
| 4q#60623_60696    | 4  | 93663829-94333303   | 669475  | GRID2                                              | 0 | 0.41 | 0.00 | 0.02 |
| 4q#60704_60707    | 4  | 94410989-94436890   | 25902   | GRID2                                              | 0 | 0.41 | 0.00 | 0.02 |
| 1p#6447_6463      | 1  | 67852140-67963473   | 111334  | GADD45A, GNG12                                     | 0 | 0.41 | 0.00 | 0.02 |
| 5q#70679_70683    | 5  | 50094782-50128782   | 34001   | PARP8                                              | 0 | 0.41 | 0.00 | 0.02 |
| 5q#70684_70688    | 5  | 50146980-50213382   | 66403   | PARP8                                              | 0 | 0.41 | 0.00 | 0.02 |
| 15q#183120_183134 | 15 | 71034004-71202224   | 168221  | NEO1                                               | 0 | 0.41 | 0.00 | 0.02 |
| 15q#182923_182973 | 15 | 69411830-69797984   | 386155  | THSD4                                              | 0 | 0.41 | 0.00 | 0.02 |
| 1p#10185_10196    | 1  | 118213933-118313899 | 99967   | WDR3, SPAG17                                       | 0 | 0.41 | 0.00 | 0.02 |
| 7p#94488_94492    | 7  | 3031197-3101452     | 70256   |                                                    | 0 | 0.41 | 0.00 | 0.02 |
| 3q#52648_52681    | 3  | 185442811-185587982 | 145172  | P5MD2, EIF4G1, CR601623, C3orf40, CLCN2, CR59052   | 0 | 0.41 | 0.00 | 0.02 |
| 3q#52910_52920    | 3  | 187873131-187944411 | 71281   | HRG, KNG1                                          | 0 | 0.41 | 0.00 | 0.02 |
| 3q#53512_53555    | 3  | 195031823-195581826 | 550004  | BC027871, BC038368, HES1, BC042334, LRRRC15        | 0 | 0.41 | 0.00 | 0.02 |
| 3q#53556_53564    | 3  | 195587839-195633175 | 45337   | GP5, AJ306929                                      | 0 | 0.41 | 0.00 | 0.02 |
| 3q#53565_53605    | 3  | 195641982-196028488 | 386507  | AJ306929, AK091527, TMEH44, LSG1, BC042533         | 0 | 0.41 | 0.00 | 0.02 |
| 5p#70546_70554    | 5  | 44410552-44516069   | 105518  | FGF10, BC042062                                    | 0 | 0.41 | 0.00 | 0.02 |
| 20p#214112_214126 | 20 | 18076636-18237052   | 160417  | CSRP2BP, ZNF133                                    | 0 | 0.41 | 0.00 | 0.02 |
| 20p#214028_214111 | 20 | 17152436-18071007   | 918572  | 483, DSTN, RRBP1, C20orf179, SNX5, C20orf72, AK022 | 0 | 0.41 | 0.00 | 0.02 |
| 20p#214127_214162 | 20 | 18245478-18522361   | 276884  | 33, BC043266, C20orf12, POLR3F, RBBP9, SEC23B, H   | 0 | 0.41 | 0.00 | 0.02 |
| 3q#53124_53139    | 3  | 190000105-190143274 | 143170  | LPP, BX641108                                      | 0 | 0.41 | 0.00 | 0.02 |
| 3q#53183_53261    | 3  | 190802175-191610769 | 808595  | TP73L, LEPREL1, CLDN1, CLDN16                      | 0 | 0.41 | 0.00 | 0.02 |
| 6q#88769_88781    | 6  | 101915885-102034365 | 118481  | GRIK2                                              | 0 | 0.41 | 0.00 | 0.02 |
| 6q#88881_88888    | 6  | 103845083-104122822 | 277740  |                                                    | 0 | 0.41 | 0.00 | 0.02 |
| 6q#88860_88869    | 6  | 102982329-103365035 | 382707  |                                                    | 0 | 0.41 | 0.00 | 0.02 |
| 11q#147857_147909 | 11 | 101761767-102205509 | 443743  | 23, MMP7, MMP20, MMP27, MMP8, MMP10, AK097805      | 0 | 0.41 | 0.00 | 0.02 |
| 9q#126162_126176  | 9  | 122578303-122653860 | 75558   |                                                    | 0 | 0.41 | 0.00 | 0.02 |
| 9q#126350_126354  | 9  | 124317715-124345585 | 27871   | GPR144, NR5A1                                      | 0 | 0.41 | 0.00 | 0.02 |
| 6q#88510_88538    | 6  | 97701185-98030231   | 329047  | C6orf167, AK091365                                 | 0 | 0.41 | 0.00 | 0.02 |
| 11q#147910_147912 | 11 | 102214618-102227342 | 12725   | MMP3                                               | 0 | 0.41 | 0.00 | 0.02 |
| 9q#124817_124921  | 9  | 107661405-109146359 | 1484955 | 610, ACTL7A, IKBKAP, CTNNA1, C9orf5, AF038201, C   | 0 | 0.41 | 0.00 | 0.02 |
| 9q#125986_126025  | 9  | 121015042-121428729 | 413688  | P110, RAB14, AK125819, GSN, STOM, AF378121, DAB    | 0 | 0.41 | 0.00 | 0.02 |
| 9q#126050_126062  | 9  | 121674076-121783020 | 108945  | AK125178                                           | 0 | 0.41 | 0.00 | 0.02 |
| 9q#126077_126161  | 9  | 121948491-122571723 | 623233  | RBM18, MRRF, PTGS1, CR621498, OR1J1, AK123016      | 0 | 0.41 | 0.00 | 0.02 |
| 9q#126227_126349  | 9  | 123024380-124306592 | 1282213 | 3, CRB2, DENND1A, AK131516, LHX2, NEK6, PSMB7, G   | 0 | 0.41 | 0.00 | 0.02 |
| 9q#126177_126213  | 9  | 122657316-122918060 | 260745  | 123569, AL833177, MNAB, ZBTB6, ZBTB26, AK130011,   | 0 | 0.41 | 0.00 | 0.02 |
| 11q#147793_147806 | 11 | 101080549-101283876 | 203328  | ANGPTL5                                            | 0 | 0.41 | 0.00 | 0.02 |
| 11q#147819_147856 | 11 | 101407249-101754554 | 347306  | C11orf70, YAP1, BIRC3, BIRC2                       | 0 | 0.41 | 0.00 | 0.02 |
| 11q#147807_147818 | 11 | 101292043-101399090 | 107048  | ANGPTL5, KIAA1377                                  | 0 | 0.41 | 0.00 | 0.02 |
| 6q#87621_87627    | 6  | 83665926-83721410   | 55485   | C6orf157                                           | 0 | 0.41 | 0.00 | 0.02 |
| 9q#125967_125985  | 9  | 120855660-121009461 | 153802  | C5, AB209031, BC089415, CEP110                     | 0 | 0.41 | 0.00 | 0.02 |
| 9q#126026_126049  | 9  | 121434462-121663919 | 229458  | DAB2IP, BC089452                                   | 0 | 0.41 | 0.00 | 0.02 |

|                   |    |                     |         |                                                   |   |      |      |      |
|-------------------|----|---------------------|---------|---------------------------------------------------|---|------|------|------|
| 9q#125616_125870  | 9  | 116038477-119797210 | 3758734 | PAPPA, ASTN2, TLR4, DBC1, CR594083                | 0 | 0.41 | 0.00 | 0.02 |
| 6q#87617_87620    | 6  | 83625458-83659113   | 33656   | C6orf157                                          | 0 | 0.41 | 0.00 | 0.02 |
| 13q#162523_162584 | 13 | 24254020-24820088   | 566069  | 5328, AK094224, BC045677, FLJ25477, BC041392, BC0 | 0 | 0.41 | 0.00 | 0.02 |
| 6q#91778_91818    | 6  | 142327743-142768676 | 440934  | AK097143, NMBR, C6orf55, GPR126                   | 0 | 0.41 | 0.00 | 0.02 |
| 6q#90221_90227    | 6  | 122983890-123031454 | 47565   | PKIB                                              | 0 | 0.41 | 0.00 | 0.02 |
| 6q#91246_91256    | 6  | 134827997-134947980 | 119984  | AY944074                                          | 0 | 0.41 | 0.00 | 0.02 |
| 9q#125559_125571  | 9  | 115059550-115172503 | 112954  | DEC1                                              | 0 | 0.41 | 0.00 | 0.02 |
| 9q#125613_125615  | 9  | 116012879-116032051 | 19173   | PAPPA                                             | 0 | 0.41 | 0.00 | 0.02 |
| 6q#87605_87607    | 6  | 83162522-83271154   | 108633  |                                                   | 0 | 0.41 | 0.00 | 0.02 |
| 13q#162591_162749 | 13 | 24872767-26241744   | 1368978 | 127263, ATP8A2, TMEEM46, RNF6, CDK8, WASF3, GPR   | 0 | 0.41 | 0.00 | 0.02 |
| 6q#91836_91858    | 6  | 143040376-143339728 | 299353  | HIVEP2, CR936782, AK057490                        | 0 | 0.41 | 0.00 | 0.02 |
| 9q#125572_125612  | 9  | 115181100-115999857 | 818758  | DEC1, C9orf27, PAPPA                              | 0 | 0.41 | 0.00 | 0.02 |
| 6q#87608_87616    | 6  | 83301479-83580835   | 279357  |                                                   | 0 | 0.41 | 0.00 | 0.02 |
| 13q#162585_162590 | 13 | 24826609-24863464   | 36856   |                                                   | 0 | 0.41 | 0.00 | 0.02 |
| 6q#91859_91961    | 6  | 143352078-144312890 | 960813  | AK127263                                          | 0 | 0.41 | 0.00 | 0.02 |
| 4q#59307_59359    | 4  | 78564045-79142427   | 578383  | 861, AIG1, DEADC1, BC037955, PEX3, FUCA2, PHACT   | 0 | 0.41 | 0.00 | 0.02 |
| 4q#59277_59306    | 4  | 78320690-78555198   | 234509  | BC006366, CXCL13, CNOT6L, MRPL1                   | 0 | 0.41 | 0.00 | 0.02 |
| 18q#202352_202357 | 18 | 21673053-21821149   | 148097  | AK097800, CCNI, BC006366, CCNG2                   | 0 | 0.41 | 0.00 | 0.02 |
| 21q#218934_218960 | 21 | 28350511-28775601   | 425091  | AK093119, BC047600                                | 0 | 0.41 | 0.00 | 0.02 |
| 4q#58528_58533    | 4  | 70212435-70254741   | 42307   | UGT2B11                                           | 0 | 0.41 | 0.00 | 0.02 |
| 4q#58575_58583    | 4  | 70793780-70896487   | 102708  | SULT1B1, SULT1E1                                  | 0 | 0.41 | 0.00 | 0.02 |
| 22q#222476_222489 | 22 | 25894786-26259380   | 364595  |                                                   | 0 | 0.41 | 0.00 | 0.02 |
| 4q#64502_64505    | 4  | 151099601-151148778 | 49178   | LRBA                                              | 0 | 0.41 | 0.00 | 0.02 |
| 4q#64551_64565    | 4  | 151683642-151811816 | 128175  |                                                   | 0 | 0.41 | 0.00 | 0.02 |
| 19p#207619_207636 | 19 | 10061011-10182958   | 121948  | FLJ11286, AF230330, PPAN, P2RY11, EIF3S4, DNMT1   | 0 | 0.41 | 0.00 | 0.02 |
| 19q#209339_209340 | 19 | 36766026-36786790   | 20765   |                                                   | 0 | 0.41 | 0.00 | 0.02 |
| 4q#64362_64389    | 4  | 149243849-149473330 | 229482  | ARHGAP10, NR3C2                                   | 0 | 0.41 | 0.00 | 0.02 |
| 4q#64428_64501    | 4  | 150053209-151092754 | 1039546 | BC040325, BC031092                                | 0 | 0.41 | 0.00 | 0.02 |
| 21q#219867_219901 | 21 | 36406529-36656182   | 249654  | BC037580, CBR3, DOPEY2, MORC3                     | 0 | 0.41 | 0.00 | 0.02 |
| 4q#64566_64597    | 4  | 151821507-152068525 | 247019  | LRBA                                              | 0 | 0.41 | 0.00 | 0.02 |
| 19p#207612_207618 | 19 | 10019842-10055892   | 36051   | LOC388503                                         | 0 | 0.41 | 0.00 | 0.02 |
| 21q#219902_219954 | 21 | 36661584-37111688   | 450105  | MORC3, CHAF1B, CLDN14, AJ566766, SIM2, HLCS       | 0 | 0.41 | 0.00 | 0.02 |
| 21q#220055_220161 | 21 | 37937257-38821026   | 883770  | DSCR4, DSCR8, BC036237, Y13896, KCNJ15, AK0579    | 0 | 0.41 | 0.00 | 0.02 |
| 22q#221288_221292 | 22 | 15440208-15471468   | 31261   | AK001299                                          | 0 | 0.41 | 0.00 | 0.02 |
| 22q#225087_225181 | 22 | 47033724-48109919   | 1076196 | BC039396, FAM19A5, AK056844, BC037788             | 0 | 0.41 | 0.00 | 0.02 |
| 20p#213855_213870 | 20 | 14969851-15113480   | 143630  | C20orf133                                         | 0 | 0.41 | 0.00 | 0.02 |
| 20p#213879_213962 | 20 | 15207265-16113894   | 906630  | C20orf133                                         | 0 | 0.41 | 0.00 | 0.02 |
| 5p#67911_67913    | 5  | 6059485-6146298     | 86814   |                                                   | 0 | 0.41 | 0.00 | 0.02 |
| 20p#213638_213656 | 20 | 12753858-13028649   | 274792  | BC036700, C20orf38                                | 0 | 0.41 | 0.00 | 0.02 |
| 20p#213963_213985 | 20 | 16161839-16374226   | 212388  | C20orf23                                          | 0 | 0.41 | 0.00 | 0.02 |
| 5p#68472_68555    | 5  | 13988638-14854403   | 865766  | Y050643, TRIO, FAM105A, AF052146, BC015392, FAM1  | 0 | 0.41 | 0.00 | 0.02 |
| 20p#213986_213993 | 20 | 16388428-16454812   | 66385   | C20orf23                                          | 0 | 0.41 | 0.00 | 0.02 |
| 20p#214418_214422 | 20 | 21435699-21459089   | 23391   | NKX2-2                                            | 0 | 0.41 | 0.00 | 0.02 |
| 1p#10230_10251    | 1  | 119131184-119334427 | 203244  | TBX15, WARS2                                      | 0 | 0.41 | 0.00 | 0.02 |
| 20p#214598_214613 | 20 | 24015020-24421833   | 406814  | AK090900, C20orf39                                | 0 | 0.41 | 0.00 | 0.02 |
| 1p#10340_10341    | 1  | 120232261-120241767 | 9507    | NOTCH2                                            | 0 | 0.41 | 0.00 | 0.02 |
| 1p#10293_10338    | 1  | 119811530-120214170 | 402641  | PHGDH, HMGCS2, AY126670, REG4, AL833369, ADAM     | 0 | 0.41 | 0.00 | 0.02 |
| 13q#169180_169213 | 13 | 109223546-109615503 | 391958  | IRS2, COL4A1                                      | 0 | 0.41 | 0.00 | 0.02 |
| 9p#118927_119004  | 9  | 4013519-4758803     | 745285  | K075059, DQ438885, SLC1A1, C9orf68, CDC37L1, BX64 | 0 | 0.41 | 0.00 | 0.02 |
| 13q#169214_169234 | 13 | 109619927-109794305 | 174379  | COL4A1, COL4A2                                    | 0 | 0.41 | 0.00 | 0.02 |
| 3p#45059_45062    | 3  | 83271733-83387231   | 115499  |                                                   | 0 | 0.41 | 0.00 | 0.02 |
| 3p#44962_45050    | 3  | 81445353-82967383   | 1522031 | GBE1, BC031255                                    | 0 | 0.41 | 0.00 | 0.02 |
| 3p#44924_44939    | 3  | 80296668-80698827   | 402160  |                                                   | 0 | 0.41 | 0.00 | 0.02 |
| 3p#44954_44961    | 3  | 81171863-81408692   | 236830  |                                                   | 0 | 0.41 | 0.00 | 0.02 |
| 4q#59670_59691    | 4  | 82713037-83134947   | 421911  | RASGEF1B                                          | 0 | 0.41 | 0.00 | 0.02 |

|                   |    |                    |         |                                                  |   |      |      |      |
|-------------------|----|--------------------|---------|--------------------------------------------------|---|------|------|------|
| 3p#44808_44855    | 3  | 78894443-79331246  | 436804  | ROBO1                                            | 0 | 0.41 | 0.00 | 0.02 |
| 3p#44940_44953    | 3  | 80752286-81144565  | 392280  |                                                  | 0 | 0.41 | 0.00 | 0.02 |
| 4q#59692_59697    | 4  | 83160175-83339036  | 178862  |                                                  | 0 | 0.41 | 0.00 | 0.02 |
| 5q#70963_70971    | 5  | 54496214-54539204  | 42991   | FLJ37927                                         | 0 | 0.41 | 0.00 | 0.02 |
| 11p#142694_142702 | 11 | 41356610-41473447  | 116838  | DQ084202                                         | 0 | 0.41 | 0.00 | 0.02 |
| 11p#142703_142704 | 11 | 41493214-41519727  | 26514   |                                                  | 0 | 0.41 | 0.00 | 0.02 |
| 5q#72481_72555    | 5  | 75176977-75992864  | 815888  | SV2C, AK094917, IQGAP2                           | 0 | 0.41 | 0.00 | 0.02 |
| 16p#189049_189050 | 16 | 32545350-32553461  | 8112    |                                                  | 0 | 0.41 | 0.00 | 0.02 |
| 16p#189051_189052 | 16 | 32561819-32745471  | 183653  |                                                  | 0 | 0.41 | 0.00 | 0.02 |
| 16p#189070_189073 | 16 | 33507497-33533490  | 25994   | BC012355                                         | 0 | 0.41 | 0.00 | 0.02 |
| 14q#175314_175331 | 14 | 78210891-78323489  | 112599  | NRXN3                                            | 0 | 0.41 | 0.00 | 0.02 |
| 11q#146737_146750 | 11 | 86333471-86456477  | 123007  | BC063022, FZD4, BC041984, TMEM135                | 0 | 0.41 | 0.00 | 0.02 |
| 19p#208617_208629 | 19 | 18251795-18348716  | 96922   | JUND, LSM4, PGPEP1                               | 0 | 0.41 | 0.00 | 0.02 |
| 19p#208658_208668 | 19 | 18556989-18639364  | 82376   | CR604171, FLJ20850, CRLF1, C19orf4, KLHL26       | 0 | 0.41 | 0.00 | 0.02 |
| 7p#94368_94397    | 7  | 2034878-2253813    | 218936  | FTSJ2, NUDT1, AL713633, SNX8, EIF3S9, CHST12, B  | 0 | 0.41 | 0.00 | 0.02 |
| 19p#208669_208676 | 19 | 18656972-18728694  | 71723   | CRTC1                                            | 0 | 0.41 | 0.00 | 0.02 |
| 7p#94256_94257    | 7  | 1070801-1084530    | 13730   |                                                  | 0 | 0.41 | 0.00 | 0.02 |
| 11q#143851_143877 | 11 | 58505185-58777247  | 272063  | 1446, FAM111B, AK124475, FAM111A, AB023154, AKO  | 0 | 0.41 | 0.00 | 0.02 |
| 6p#82300_82347    | 6  | 17925587-18332467  | 406881  | KIF13A, S62904, NHLRC1, TPMT, AOF1, DEK          | 0 | 0.41 | 0.00 | 0.02 |
| 6p#82348_82353    | 6  | 18333444-18375127  | 41684   | DEK                                              | 0 | 0.41 | 0.00 | 0.02 |
| 6p#82509_82638    | 6  | 20923547-22688282  | 1764736 | CDKAL1, SOX4, AK026189, BC044235, PRL, HDGFL1    | 0 | 0.41 | 0.00 | 0.02 |
| 7p#94398_94411    | 7  | 2264912-2356689    | 91778   | AK096284, LFN3, C7orf27                          | 0 | 0.41 | 0.00 | 0.02 |
| 7p#94412_94432    | 7  | 2366841-2510989    | 144149  | C7orf27, IQCE, TTYH3, AMZ1                       | 0 | 0.41 | 0.00 | 0.02 |
| 19p#208548_208552 | 19 | 17767800-17788374  | 20575   | B3GNT3, INSL3                                    | 0 | 0.41 | 0.00 | 0.02 |
| 11p#142576_142577 | 11 | 39662952-39686918  | 23967   |                                                  | 0 | 0.41 | 0.00 | 0.02 |
| 11p#142464_142467 | 11 | 36455484-36475438  | 19955   | AK128396, TRAF6                                  | 0 | 0.41 | 0.00 | 0.02 |
| 11p#142439_142463 | 11 | 36224782-36448292  | 223511  | C11orf55, COMMD9, AK055042, FLJ14213             | 0 | 0.41 | 0.00 | 0.02 |
| 11p#141953_141967 | 11 | 30753121-30883272  | 130152  | FLJ46154                                         | 0 | 0.41 | 0.00 | 0.02 |
| 3p#40750_40757    | 3  | 33744902-33830098  | 85197   | PDCD6IP                                          | 0 | 0.41 | 0.00 | 0.02 |
| 3p#40676_40749    | 3  | 32992328-33733082  | 740755  | GLB1, CRTAP, AB011099, FBXL2, UBP1, CLASP2       | 0 | 0.41 | 0.00 | 0.02 |
| 3p#40759_40776    | 3  | 33852573-34208222  | 355650  | PDCD6IP                                          | 0 | 0.41 | 0.00 | 0.02 |
| 11q#146273_146275 | 11 | 81074720-81145017  | 70298   |                                                  | 0 | 0.41 | 0.00 | 0.02 |
| 17p#194957_194959 | 17 | 20779671-20808304  | 28634   | BC072410, BC043529                               | 0 | 0.41 | 0.00 | 0.02 |
| 11q#146559_146585 | 11 | 84274441-84657420  | 382980  | DLG2, CR749820                                   | 0 | 0.41 | 0.00 | 0.02 |
| 11q#146586_146611 | 11 | 84679674-84993486  | 313813  | CR749820                                         | 0 | 0.41 | 0.00 | 0.02 |
| 17p#195017_195021 | 17 | 21357442-21393637  | 36196   | BX640850                                         | 0 | 0.41 | 0.00 | 0.02 |
| 17p#194960_194968 | 17 | 20817703-20877247  | 59545   | BC043529, AB028986                               | 0 | 0.41 | 0.00 | 0.02 |
| 11q#146612_146630 | 11 | 85006318-85114863  | 108546  | CR749820, TMEM126B, TMEM126A, ZF, CCDC89, SYTL   | 0 | 0.41 | 0.00 | 0.02 |
| 17p#194987_194994 | 17 | 21059131-211108926 | 49796   | MGC33894                                         | 0 | 0.41 | 0.00 | 0.02 |
| 17p#195010_195016 | 17 | 21248682-21349060  | 100379  | BC027982, KCNJ12                                 | 0 | 0.41 | 0.00 | 0.02 |
| 17p#194969_194973 | 17 | 20882716-20920696  | 37981   | AB028986                                         | 0 | 0.41 | 0.00 | 0.02 |
| 11q#144372_144373 | 11 | 62704958-62708734  | 3777    | LOC387601                                        | 0 | 0.41 | 0.00 | 0.02 |
| 7p#94258_94265    | 7  | 1094460-1167355    | 72896   |                                                  | 0 | 0.41 | 0.00 | 0.02 |
| 7p#94619_94621    | 7  | 4213782-4250212    | 36431   |                                                  | 0 | 0.41 | 0.00 | 0.02 |
| 7p#94704_94710    | 7  | 5027077-5052991    | 25915   | WIPI2, BC009270                                  | 0 | 0.41 | 0.00 | 0.02 |
| 7p#94717_94723    | 7  | 5143987-5191245    | 47259   | AB058759                                         | 0 | 0.41 | 0.00 | 0.02 |
| 7p#94742_94752    | 7  | 5325583-5399918    | 74336   | FBXL18, BC033371, CR597103                       | 0 | 0.41 | 0.00 | 0.02 |
| 11q#143831_143848 | 11 | 58353981-58484160  | 130180  | GLYATL2, AF087878, GLYATL1, AK091446             | 0 | 0.41 | 0.00 | 0.02 |
| 11q#143764_143786 | 11 | 57729742-57893896  | 164155  | OR10W1, LOC399898, OR5B17                        | 0 | 0.41 | 0.00 | 0.02 |
| 7p#94588_94618    | 7  | 3911149-4194273    | 283125  | SDK1                                             | 0 | 0.41 | 0.00 | 0.02 |
| 7p#94669_94697    | 7  | 4694878-4948082    | 253205  | _J10324, AK094524, MMD2, BC068459, BC071642, RBA | 0 | 0.41 | 0.00 | 0.02 |
| 7p#94724_94741    | 7  | 5206590-5321638    | 115049  | BC029940, BC036932, FBXL18                       | 0 | 0.41 | 0.00 | 0.02 |
| 11q#143742_143763 | 11 | 57588112-57724282  | 136171  | OR9Q1                                            | 0 | 0.41 | 0.00 | 0.02 |
| 11q#143787_143802 | 11 | 57907982-58024861  | 116880  | OR5B12                                           | 0 | 0.41 | 0.00 | 0.02 |
| 11q#143803_143809 | 11 | 58033198-58086124  | 52927   | LPXN                                             | 0 | 0.41 | 0.00 | 0.02 |

|                   |    |                     |         |                                                    |   |      |      |      |
|-------------------|----|---------------------|---------|----------------------------------------------------|---|------|------|------|
| 15q#183105_183119 | 15 | 70804042-71015488   | 211447  | BBS4, ADPGK, AK127877                              | 0 | 0.41 | 0.00 | 0.02 |
| 15q#183135_183167 | 15 | 71211671-71466044   | 254374  | NEO1, HCN4                                         | 0 | 0.41 | 0.00 | 0.02 |
| 15q#183213_183235 | 15 | 71933145-72060140   | 126996  | TBC1D21, AK056885, LOXL1                           | 0 | 0.41 | 0.00 | 0.02 |
| 15q#183236_183255 | 15 | 72069623-72258954   | 189332  | STOML1, PML, BC050067, ISLR2, ISLR, STRA6          | 0 | 0.41 | 0.00 | 0.02 |
| 15q#183256_183258 | 15 | 72263544-72272817   | 9274    | STRA6                                              | 0 | 0.41 | 0.00 | 0.02 |
| 7p#94474_94476    | 7  | 2863783-2879830     | 16048   |                                                    | 0 | 0.41 | 0.00 | 0.02 |
| 7p#94477_94481    | 7  | 2887836-2940681     | 52846   | AK000831                                           | 0 | 0.41 | 0.00 | 0.02 |
| 7p#94483_94487    | 7  | 2963249-3014400     | 51152   | BC038729                                           | 0 | 0.41 | 0.00 | 0.02 |
| 11q#146279_146287 | 11 | 81283404-81400988   | 117585  | BC041900                                           | 0 | 0.41 | 0.00 | 0.02 |
| 7p#96427_96428    | 7  | 26871427-26885882   | 14456   |                                                    | 0 | 0.41 | 0.00 | 0.02 |
| 7p#96470_96500    | 7  | 27097184-27470405   | 373222  | G36716, HIBADH                                     | 0 | 0.41 | 0.00 | 0.02 |
| 19q#212197_212212 | 19 | 61543352-61664042   | 120691  | 232, ZNF542, ZNF582, BC040939, ZNF583, AL833236, 4 | 0 | 0.41 | 0.00 | 0.02 |
| 7p#94884_94885    | 7  | 6550482-6558027     | 7546    | BC041364                                           | 0 | 0.41 | 0.00 | 0.02 |
| 7p#96315_96426    | 7  | 25632308-26851043   | 1218736 | 42B1, BX641084, CBX3, SNX10, AK056484, D42038, BX  | 0 | 0.41 | 0.00 | 0.02 |
| 7p#96429_96443    | 7  | 26892332-26950189   | 57858   | HOXA1, HOXA2, HOXA3, HOXA4                         | 0 | 0.41 | 0.00 | 0.02 |
| 7p#96457_96458    | 7  | 26994398-27000165   | 5768    | HOXA11, BC025338                                   | 0 | 0.41 | 0.00 | 0.02 |
| 7p#96459_96461    | 7  | 27003431-27011111   | 7681    | HOXA13                                             | 0 | 0.41 | 0.00 | 0.02 |
| 7p#96462_96464    | 7  | 27020095-27031956   | 11862   |                                                    | 0 | 0.41 | 0.00 | 0.02 |
| 7p#96465_96469    | 7  | 27043111-27071650   | 28540   | EVX1                                               | 0 | 0.41 | 0.00 | 0.02 |
| 19q#212092_212099 | 19 | 60632058-60675272   | 43215   | LOC284296, ISOC2                                   | 0 | 0.41 | 0.00 | 0.02 |
| 19q#212139_212196 | 19 | 60930583-61530330   | 599748  | NALP4, NALP13, NALP8, NALP5, BC040925, LOC1262     | 0 | 0.41 | 0.00 | 0.02 |
| 19q#212434_212456 | 19 | 63505742-63632538   | 126797  | R2, A1BG, ZNF497, BC029960, RPS5, AK096324, ZNF5   | 0 | 0.41 | 0.00 | 0.02 |
| 11q#146304_146308 | 11 | 81632029-81690960   | 58932   | BC041900                                           | 0 | 0.41 | 0.00 | 0.02 |
| 19q#212124_212138 | 19 | 60835668-60920089   | 84422   | ZNF580, ZNF581, CCDC106, U2AF2, EPN1, NALP9        | 0 | 0.41 | 0.00 | 0.02 |
| 5p#69933_69969    | 5  | 36706936-37157689   | 450754  | SLC1A3, AK000901, NIPBL, FLJ13231                  | 0 | 0.41 | 0.00 | 0.02 |
| 5p#70009_70024    | 5  | 37530696-37670331   | 139636  | WDR70                                              | 0 | 0.41 | 0.00 | 0.02 |
| 5p#70534_70545    | 5  | 44270163-44396686   | 126524  | FGF10                                              | 0 | 0.41 | 0.00 | 0.02 |
| 5p#70565_70569    | 5  | 44812420-44849062   | 36643   | MRPS30                                             | 0 | 0.41 | 0.00 | 0.02 |
| 6p#83773_83774    | 6  | 32654432-32660134   | 5703    | BC003593, HLA-DRB1                                 | 0 | 0.41 | 0.00 | 0.02 |
| 3q#52921_53123    | 3  | 187953483-18992710  | 2039228 | RTP1, AK127178, MASP1, CR620263, RTP4, AK127405,   | 0 | 0.41 | 0.00 | 0.02 |
| 3q#53502_53511    | 3  | 194910863-195019737 | 108875  |                                                    | 0 | 0.41 | 0.00 | 0.02 |
| 1p#10344_10345    | 1  | 120405944-120719037 | 313094  | AK022804, AK127439                                 | 0 | 0.41 | 0.00 | 0.02 |
| 1p#10252_10289    | 1  | 119346143-119774161 | 428019  | 063600, BC043601, AK125759, HAO2, HSD3B2, CR6274   | 0 | 0.41 | 0.00 | 0.02 |
| 1p#10342_10343    | 1  | 120313797-120384679 | 70883   | NOTCH2                                             | 0 | 0.41 | 0.00 | 0.02 |
| 1p#10290_10292    | 1  | 119783556-119804812 | 21257   |                                                    | 0 | 0.41 | 0.00 | 0.02 |
| 20p#213660_213675 | 20 | 13068565-13297737   | 229173  | AK075271                                           | 0 | 0.41 | 0.00 | 0.02 |
| 20p#213751_213822 | 20 | 14014301-14648099   | 633799  | C20orf133                                          | 0 | 0.41 | 0.00 | 0.02 |
| 20p#213829_213845 | 20 | 14710983-14876627   | 165645  | C20orf133                                          | 0 | 0.41 | 0.00 | 0.02 |
| 20p#213657_213659 | 20 | 13036303-13062960   | 26658   | AK075271                                           | 0 | 0.41 | 0.00 | 0.02 |
| 20p#213676_213750 | 20 | 13318091-14000370   | 682280  | BC025266, AK022670, C20orf6, C20orf7, AL137678, C2 | 0 | 0.41 | 0.00 | 0.02 |
| 20p#213846_213854 | 20 | 14884522-14963311   | 78790   | C20orf133                                          | 0 | 0.41 | 0.00 | 0.02 |
| 20p#213871_213878 | 20 | 15125669-15198224   | 72556   | C20orf133                                          | 0 | 0.41 | 0.00 | 0.02 |
| 20p#213823_213828 | 20 | 14661027-14704452   | 43426   | C20orf133                                          | 0 | 0.41 | 0.00 | 0.02 |
| 5p#67897_67910    | 5  | 5565815-6035901     | 470087  |                                                    | 0 | 0.41 | 0.00 | 0.02 |
| 20p#213633_213637 | 20 | 12615562-12704783   | 89222   |                                                    | 0 | 0.41 | 0.00 | 0.02 |
| 5p#68556_68770    | 5  | 14864867-17549677   | 2684811 | 0337, BC043001, BC042074, ZNF622, FLJ20152, AK09   | 0 | 0.41 | 0.00 | 0.02 |
| 5p#68777_68790    | 5  | 17685501-17910433   | 224933  | BC028204                                           | 0 | 0.41 | 0.00 | 0.02 |
| 5p#69456_69470    | 5  | 31457116-31586180   | 129065  | RNASEN, C5orf22                                    | 0 | 0.41 | 0.00 | 0.02 |
| 5p#68771_68776    | 5  | 17559190-17675026   | 115837  |                                                    | 0 | 0.41 | 0.00 | 0.02 |
| 5p#68791_68807    | 5  | 17924026-18415047   | 491022  | BC028204                                           | 0 | 0.41 | 0.00 | 0.02 |
| 5p#69471_69484    | 5  | 31595763-31746198   | 150436  | AB002298                                           | 0 | 0.41 | 0.00 | 0.02 |
| 5p#69485_69517    | 5  | 31763911-32008600   | 244690  | AB002298, PDZD2                                    | 0 | 0.41 | 0.00 | 0.02 |
| 16p#189054_189058 | 16 | 33205648-33298945   | 93298   | BC012355                                           | 0 | 0.41 | 0.00 | 0.02 |
| 16p#189059_189068 | 16 | 33300400-33486966   | 186567  | BC012355                                           | 0 | 0.41 | 0.00 | 0.02 |
| 14q#175307_175313 | 14 | 78146680-78199436   | 52757   | NRXN3                                              | 0 | 0.41 | 0.00 | 0.02 |

|            |        |    |                     |         |                                                    |  |  |   |      |      |      |
|------------|--------|----|---------------------|---------|----------------------------------------------------|--|--|---|------|------|------|
| 13q#165493 | 165499 | 13 | 55404411-55520279   | 115869  |                                                    |  |  | 0 | 0.41 | 0.00 | 0.02 |
| 14q#174691 | 174715 | 14 | 72989348-73147915   | 158568  | AK05876, MGC48595, AK093131, ACOT2, ACOT4, AK      |  |  | 0 | 0.41 | 0.00 | 0.02 |
| 13q#169294 | 169310 | 13 | 110240256-110364081 | 123826  | AK057970, LOC283487, ANKRD10                       |  |  | 0 | 0.41 | 0.00 | 0.02 |
| 11q#147492 | 147501 | 11 | 96352481-96647243   | 294763  |                                                    |  |  | 0 | 0.41 | 0.00 | 0.02 |
| 9q#123459  | 123507 | 9  | 91656415-92114843   | 458429  | ROR2, SPTLC1, AY786555, AK023662, IARS             |  |  | 0 | 0.41 | 0.00 | 0.02 |
| 11q#146777 | 146781 | 11 | 86719197-86822182   | 102986  |                                                    |  |  | 0 | 0.41 | 0.00 | 0.02 |
| 13q#168981 | 169044 | 13 | 106729235-107606327 | 877093  | L10374                                             |  |  | 0 | 0.41 | 0.00 | 0.02 |
| 13q#169088 | 169090 | 13 | 108107092-108125196 | 18105   | MYR8                                               |  |  | 0 | 0.41 | 0.00 | 0.02 |
| 11q#147232 | 147274 | 11 | 93079305-93553751   | 474447  | AB051518, JOSD3, C11orf54, CRSP6, AF086184, PANX   |  |  | 0 | 0.41 | 0.00 | 0.02 |
| 11q#147288 | 147368 | 11 | 93778598-94550683   | 772086  | AMOTL1, AK074084, HSPC148, JMJD2D, SRP46, BC0      |  |  | 0 | 0.41 | 0.00 | 0.02 |
| 13q#165451 | 165474 | 13 | 54222108-54857524   | 635417  |                                                    |  |  | 0 | 0.41 | 0.00 | 0.02 |
| 13q#169274 | 169293 | 13 | 110083989-110231103 | 147115  | FLJ10769, FLJ12118, ING1, AK057970                 |  |  | 0 | 0.41 | 0.00 | 0.02 |
| 13q#169311 | 169359 | 13 | 110372035-110794357 | 422323  | BC040271, ARHGFE7, C13orf16                        |  |  | 0 | 0.41 | 0.00 | 0.02 |
| 11q#146707 | 146720 | 11 | 85970219-86135323   | 165105  | ME3                                                |  |  | 0 | 0.41 | 0.00 | 0.02 |
| 11q#146721 | 146731 | 11 | 86163054-86264584   | 101531  | PRSS23, BC063022                                   |  |  | 0 | 0.41 | 0.00 | 0.02 |
| 11q#146766 | 146776 | 11 | 86625278-86711426   | 86149   | TMEM135                                            |  |  | 0 | 0.41 | 0.00 | 0.02 |
| 13q#169091 | 169141 | 13 | 108133592-108553839 | 420248  | MYR8                                               |  |  | 0 | 0.41 | 0.00 | 0.02 |
| 11q#147482 | 147491 | 11 | 96028955-96313858   | 284904  | BC033698                                           |  |  | 0 | 0.41 | 0.00 | 0.02 |
| 11q#147502 | 147526 | 11 | 96666462-97475807   | 809346  |                                                    |  |  | 0 | 0.41 | 0.00 | 0.02 |
| 11q#147148 | 147231 | 11 | 92037259-93072585   | 1035327 | NR1B, SLC36A4, CCDC67, AK127973, AK058122, C11o    |  |  | 0 | 0.41 | 0.00 | 0.02 |
| 11q#147275 | 147287 | 11 | 93565607-93766361   | 200755  | GPR83                                              |  |  | 0 | 0.41 | 0.00 | 0.02 |
| 9p#118693  | 118712 | 9  | 1467660-1714106     | 246447  |                                                    |  |  | 0 | 0.41 | 0.00 | 0.02 |
| 13q#165674 | 165680 | 13 | 59345485-59396931   | 51447   | DIAPH3                                             |  |  | 0 | 0.41 | 0.00 | 0.02 |
| 9p#119069  | 119074 | 9  | 5298149-5338628     | 40480   | RLN1                                               |  |  | 0 | 0.41 | 0.00 | 0.02 |
| 11q#146276 | 146278 | 11 | 81192409-81259800   | 67392   |                                                    |  |  | 0 | 0.41 | 0.00 | 0.02 |
| 11q#146309 | 146312 | 11 | 81709130-81767955   | 58826   | BC041900                                           |  |  | 0 | 0.41 | 0.00 | 0.02 |
| 11q#146684 | 146706 | 11 | 85750119-85955000   | 204882  | CCDC81, AK091677, ME3                              |  |  | 0 | 0.41 | 0.00 | 0.02 |
| 11q#146732 | 146736 | 11 | 86285351-86328652   | 43302   | BC063022                                           |  |  | 0 | 0.41 | 0.00 | 0.02 |
| 13q#169235 | 169246 | 13 | 109800564-109877083 | 76520   | COL4A2                                             |  |  | 0 | 0.41 | 0.00 | 0.02 |
| 11q#146754 | 146765 | 11 | 86502317-86615409   | 113093  | TMEM135                                            |  |  | 0 | 0.41 | 0.00 | 0.02 |
| 11q#147086 | 147147 | 11 | 90873318-92011130   | 1137813 | AK054903, BC016722                                 |  |  | 0 | 0.41 | 0.00 | 0.02 |
| 13q#166967 | 166977 | 13 | 79473922-79746297   | 272376  |                                                    |  |  | 0 | 0.41 | 0.00 | 0.02 |
| 9p#119005  | 119068 | 9  | 4771753-5289996     | 518244  | IPF1                                               |  |  | 0 | 0.41 | 0.00 | 0.02 |
| 9p#119075  | 119120 | 9  | 5342284-5758631     | 416348  | RCL1, AK021739, JAK2, INSL6, INSL4, RLN2           |  |  | 0 | 0.41 | 0.00 | 0.02 |
| 13q#162772 | 162856 | 13 | 26577826-27352729   | 774904  | prf46, BC036853, CD274, PDCCD1LG2, AL136875, KIAA1 |  |  | 0 | 0.41 | 0.00 | 0.02 |
| 13q#162857 | 162860 | 13 | 27366603-2739046    | 22444   | 1, RASL11A, D32257, MTIF3, AK095319, LNX2, MGC98   |  |  | 0 | 0.41 | 0.00 | 0.02 |
| 13q#162861 | 162867 | 13 | 27392825-27418025   | 25201   | CR593175                                           |  |  | 0 | 0.41 | 0.00 | 0.02 |
| 13q#162373 | 162400 | 13 | 2281106-23129297    | 318192  | IPF1                                               |  |  | 0 | 0.41 | 0.00 | 0.02 |
| 11q#146631 | 146635 | 11 | 85122920-85154992   | 32073   | SACS, AK125458, AY927572, TNFRSF19                 |  |  | 0 | 0.41 | 0.00 | 0.02 |
| 13q#162309 | 162322 | 13 | 21645528-21893869   | 248342  | SYTL2, AB046817                                    |  |  | 0 | 0.41 | 0.00 | 0.02 |
| 17p#194995 | 194998 | 17 | 21119904-21139998   | 20095   | AK054845                                           |  |  | 0 | 0.41 | 0.00 | 0.02 |
| 11p#140722 | 140741 | 11 | 14006011-14190321   | 184311  | MAP2K3                                             |  |  | 0 | 0.41 | 0.00 | 0.02 |
| 13q#169247 | 169272 | 13 | 109883012-110067979 | 184968  | SPON1                                              |  |  | 0 | 0.41 | 0.00 | 0.02 |
| 17p#194750 | 194774 | 17 | 18063385-18224340   | 160956  | COL4A2, RAB20, FLJ10769                            |  |  | 0 | 0.41 | 0.00 | 0.02 |
| 13q#162750 | 162771 | 13 | 26246516-26570447   | 323932  | FLJ1, SMCR7, AF147387, TOP3A, SMCR8, SHMT1, AK     |  |  | 0 | 0.41 | 0.00 | 0.02 |
| 13q#162868 | 162870 | 13 | 27423848-27435077   | 11230   | USP12                                              |  |  | 0 | 0.41 | 0.00 | 0.02 |
| 13q#162871 | 162878 | 13 | 27436123-27476168   | 40046   | CDX2                                               |  |  | 0 | 0.41 | 0.00 | 0.02 |
| 5q#70972   | 71026  | 5  | 54545977-55008726   | 462750  | CDX2, FLT3                                         |  |  | 0 | 0.41 | 0.00 | 0.02 |
| 13q#162323 | 162328 | 13 | 21928179-22103149   | 174971  | UNG2, DHX29, SKIV2L2, PPAP2A, FLJ90709             |  |  | 0 | 0.41 | 0.00 | 0.02 |
| 13q#162329 | 162335 | 13 | 22122951-22312397   | 189447  |                                                    |  |  | 0 | 0.41 | 0.00 | 0.02 |
| 17p#194974 | 194986 | 17 | 20938874-21054193   | 115320  | DHRS7B, TMEM11                                     |  |  | 0 | 0.41 | 0.00 | 0.02 |
| 17p#194999 | 195009 | 17 | 21147675-21238771   | 91097   | MAP2K3, BC027982                                   |  |  | 0 | 0.41 | 0.00 | 0.02 |
| 5p#70468   | 70484  | 5  | 43330593-43489851   | 159259  | HMGCS1, CCL28, FLJ21657                            |  |  | 0 | 0.41 | 0.00 | 0.02 |
| 11p#140742 | 140794 | 11 | 14197308-14725540   | 528233  | SPON1, BC041974, RRAS2, COPB, PSMA1, PDE3B         |  |  | 0 | 0.41 | 0.00 | 0.02 |
| 12p#152622 | 152633 | 12 | 19494028-19636000   | 141973  | AEBP2                                              |  |  | 0 | 0.41 | 0.00 | 0.02 |



|                   |    |                     |         |                                                    |   |      |      |      |
|-------------------|----|---------------------|---------|----------------------------------------------------|---|------|------|------|
| 2q#37109_37181    | 2  | 233200800-233780794 | 579995  | 25362, EIF4E2, AB209519, EFHD1, TNRC15, BC049848   | 0 | 0.41 | 0.00 | 0.02 |
| 2q#37190_37209    | 2  | 233880367-234062659 | 182293  | INPP5D, ATG16L1, SAG, DGKD                         | 0 | 0.41 | 0.00 | 0.02 |
| 11p#140795_140832 | 11 | 14737533-15080139   | 342607  | PDE3B, CYP2R1, AK054728, CALCA, CALCB              | 0 | 0.41 | 0.00 | 0.02 |
| 11p#140849_140929 | 11 | 15253180-16589770   | 1336591 | SOX6, AK097455                                     | 0 | 0.41 | 0.00 | 0.02 |
| 4q#59274_59276    | 4  | 78293144-78313618   | 20475   | Sep-11                                             | 0 | 0.41 | 0.00 | 0.02 |
| 4q#58493_58513    | 4  | 69842813-70103889   | 261077  | UGT2B10, UGT2A3                                    | 0 | 0.41 | 0.00 | 0.02 |
| 4q#59204_59264    | 4  | 77619788-78203534   | 583747  | FLJ25770, SHRM, AK097800                           | 0 | 0.41 | 0.00 | 0.02 |
| 5p#69533_69534    | 5  | 32160716-32166091   | 5376    | GOLPH3                                             | 0 | 0.41 | 0.00 | 0.02 |
| 5p#69535_69632    | 5  | 32171523-33227663   | 1056141 | OLPH3, MTMR12, ZFR, SUB1, AK022112, NPR3, C5orf4   | 0 | 0.41 | 0.00 | 0.02 |
| 5p#69633_69705    | 5  | 33239915-33970653   | 730739  | AK022112, TARS, ADAMTS12                           | 0 | 0.41 | 0.00 | 0.02 |
| 5p#69706_69839    | 5  | 33976160-35722016   | 1745857 | N14, FLJ25439, AK058168, AK125316, RAD1, BXDC2, L  | 0 | 0.41 | 0.00 | 0.02 |
| 5p#69840_69916    | 5  | 35736339-36344637   | 608299  | APSL, UGT3A1, AK091977, UGT3A2, LMBRD2, SKP2, F    | 0 | 0.41 | 0.00 | 0.02 |
| 5p#69970_69984    | 5  | 37167238-37316881   | 149644  | FLJ13231, AL832176                                 | 0 | 0.41 | 0.00 | 0.02 |
| 5p#70025_70435    | 5  | 37684272-43011119   | 5326848 | P61, PTGER4, CR598481, OSRF, PRKAA1, RPL37, CAR    | 0 | 0.41 | 0.00 | 0.02 |
| 5p#70460_70467    | 5  | 43259734-43325817   | 66084   | MGC42105, HMGCS1                                   | 0 | 0.41 | 0.00 | 0.02 |
| 17p#194655_194666 | 17 | 17167647-17304918   | 137272  | NT5M                                               | 0 | 0.41 | 0.00 | 0.02 |
| 20p#213589_213632 | 20 | 11770146-12598032   | 827887  | BTBD3                                              | 0 | 0.41 | 0.00 | 0.02 |
| 2q#35215_35219    | 2  | 212469257-212504839 | 35583   | ERBB4                                              | 0 | 0.41 | 0.00 | 0.02 |
| 2q#35220_35224    | 2  | 212512975-212544505 | 31531   | ERBB4                                              | 0 | 0.41 | 0.00 | 0.02 |
| 4q#60553_60562    | 4  | 92546213-92610965   | 64753   | AB051467                                           | 0 | 0.41 | 0.00 | 0.02 |
| 4q#60608_60613    | 4  | 93421750-93559460   | 137711  |                                                    | 0 | 0.41 | 0.00 | 0.02 |
| 2q#37348_37351    | 2  | 235959412-236075032 | 115621  |                                                    | 0 | 0.41 | 0.00 | 0.02 |
| 11p#140998_141015 | 11 | 17262725-17414688   | 151964  | VUUB2, AK097398, DKFZp686O24166, KCNJ11, ABCC8     | 0 | 0.41 | 0.00 | 0.02 |
| 21q#218961_219021 | 21 | 28788834-29403180   | 614347  | PO, HEMK2, ZNF294, C21orf6, USP16, CCT8, AF269161, | 0 | 0.41 | 0.00 | 0.02 |
| 21q#219127_219131 | 21 | 30384671-30450079   | 65409   | AY063454                                           | 0 | 0.41 | 0.00 | 0.02 |
| 4q#58514_58527    | 4  | 70114224-70205337   | 91114   | UGT2B7                                             | 0 | 0.41 | 0.00 | 0.02 |
| 4q#58554_58565    | 4  | 70531632-70664058   | 132427  | UGT2B4, UGT2A1                                     | 0 | 0.41 | 0.00 | 0.02 |
| 4q#58566_58574    | 4  | 70669372-70777064   | 107693  | UGT2A1, SUL1B1                                     | 0 | 0.41 | 0.00 | 0.02 |
| 4q#59184_59199    | 4  | 77424156-77577990   | 153835  | NUP54, SCARB2, AK124936, AK092277                  | 0 | 0.41 | 0.00 | 0.02 |
| 4q#59200_59203    | 4  | 77586278-77604190   | 17913   | GENX-3414, FLJ25770                                | 0 | 0.41 | 0.00 | 0.02 |
| 5p#69438_69455    | 5  | 31255681-31448662   | 192982  | CDH6, RNASEN                                       | 0 | 0.41 | 0.00 | 0.02 |
| 5p#70485_70486    | 5  | 43494927-43511701   | 16775   | FLJ21657                                           | 0 | 0.41 | 0.00 | 0.02 |
| 5p#70502_70533    | 5  | 43636806-44244917   | 608112  | AK096668, NNT                                      | 0 | 0.41 | 0.00 | 0.02 |
| 5p#70570_70647    | 5  | 44856115-46150843   | 1294729 | BX537747, HCN1                                     | 0 | 0.41 | 0.00 | 0.02 |
| 11q#144191_144193 | 11 | 61366393-61391419   | 25027   | FADS2                                              | 0 | 0.41 | 0.00 | 0.02 |
| 4q#58551_58553    | 4  | 70511259-70526940   | 15682   | UGT2B4                                             | 0 | 0.41 | 0.00 | 0.02 |
| 4q#59265_59273    | 4  | 78215581-78287999   | 72419   | AK097800, SEPT11                                   | 0 | 0.41 | 0.00 | 0.02 |
| 4q#59509_59513    | 4  | 80785152-80847631   | 62480   | CR607602                                           | 0 | 0.41 | 0.00 | 0.02 |
| 12p#151535_151564 | 12 | 7689477-7859361     | 169885  | L26234, GDF3, DPPA3, CLEC4C, AY151739, NANOG,      | 0 | 0.41 | 0.00 | 0.02 |
| 12p#151565_151573 | 12 | 7865499-7944727     | 79229   | SLC2A14, AK097770                                  | 0 | 0.41 | 0.00 | 0.02 |
| 12p#151574_151585 | 12 | 7956956-8062485     | 105530  | SLC2A3                                             | 0 | 0.41 | 0.00 | 0.02 |
| 12p#151600_151615 | 12 | 8136632-8472043     | 335412  | NECAP1, CLEC4A, AK096301, LOC389634, BC004857      | 0 | 0.41 | 0.00 | 0.02 |
| 4q#58549_58550    | 4  | 70485049-70501354   | 16306   |                                                    | 0 | 0.41 | 0.00 | 0.02 |
| 4q#59514_59519    | 4  | 80880283-81021004   | 140722  |                                                    | 0 | 0.41 | 0.00 | 0.02 |
| 4q#59520_59532    | 4  | 81064847-81213243   | 148397  | AK056825, ANTXR2                                   | 0 | 0.41 | 0.00 | 0.02 |
| 4q#59533_59545    | 4  | 81230118-81341711   | 111594  | ANTXR2                                             | 0 | 0.41 | 0.00 | 0.02 |
| 4q#59546_59551    | 4  | 81347692-81431238   | 83547   | ANTXR2                                             | 0 | 0.41 | 0.00 | 0.02 |
| 12p#151586_151599 | 12 | 8068318-8129339     | 61022   | FOXJ2, CR609272, C3AR1, AK092229, NECAP1           | 0 | 0.41 | 0.00 | 0.02 |
| 4q#58536_58539    | 4  | 70305861-70347893   | 42033   | UGT2B28                                            | 0 | 0.41 | 0.00 | 0.02 |
| 4q#58545_58547    | 4  | 70410860-70445775   | 34916   |                                                    | 0 | 0.41 | 0.00 | 0.02 |
| 4q#60614_60622    | 4  | 93571016-93653977   | 82962   | GRID2                                              | 0 | 0.41 | 0.00 | 0.02 |
| 4q#60708_60755    | 4  | 94448949-94904694   | 455746  | GRID2                                              | 0 | 0.41 | 0.00 | 0.02 |
| 4q#60776_60788    | 4  | 95108274-95412821   | 304548  | ATOH1, BC014345                                    | 0 | 0.41 | 0.00 | 0.02 |
| 11p#141968_141978 | 11 | 30889416-31002422   | 113007  | FLJ46154                                           | 0 | 0.41 | 0.00 | 0.02 |
| 11p#141979_142094 | 11 | 31009421-32326783   | 1317363 | K126066, DCDC1, ZCSL3, MMP1L, ELP4, PAX6, BX64     | 0 | 0.41 | 0.00 | 0.02 |

|                   |    |                     |         |                                                     |   |      |      |      |
|-------------------|----|---------------------|---------|-----------------------------------------------------|---|------|------|------|
| 11p#142095_142230 | 11 | 32344536-33754164   | 1409629 | 1, DEPDC7, TCP11L1, AK021448, CSTF3, BC043375, Y    | 0 | 0.41 | 0.00 | 0.02 |
| 2q#37352_37365    | 2  | 236104428-236277709 | 173282  | CENTG2                                              | 0 | 0.41 | 0.00 | 0.02 |
| 21q#219022_219126 | 21 | 29414744-30357738   | 942995  | C21orf7, AF490769, BACH1, GRIK1                     | 0 | 0.41 | 0.00 | 0.02 |
| 5p#69400_69406    | 5  | 30148340-30343513   | 195174  |                                                     | 0 | 0.41 | 0.00 | 0.02 |
| 5p#69407_69409    | 5  | 30385731-30449575   | 63845   |                                                     | 0 | 0.41 | 0.00 | 0.02 |
| 5p#69427_69437    | 5  | 31053949-31244676   | 190728  | CDH6                                                | 0 | 0.41 | 0.00 | 0.02 |
| 5p#69985_69990    | 5  | 37327849-37367669   | 39821   | NUP155                                              | 0 | 0.41 | 0.00 | 0.02 |
| 5p#69991_70004    | 5  | 37378446-37510249   | 131804  | NUP155, WDR70                                       | 0 | 0.41 | 0.00 | 0.02 |
| 5p#70436_70459    | 5  | 43030170-43246375   | 216206  | BC046188, CR615733, AK075204, ZNF131, MGC42105      | 0 | 0.41 | 0.00 | 0.02 |
| 6p#81638_81652    | 6  | 9943691-10085779    | 142089  | AF520803, OFCC1                                     | 0 | 0.41 | 0.00 | 0.02 |
| 11q#144188_144190 | 11 | 61339118-61354681   | 15564   | FADS1, AF108658, FADS2                              | 0 | 0.41 | 0.00 | 0.02 |
| 19q#209332_209333 | 19 | 36524581-36537564   | 12984   | BX648745                                            | 0 | 0.41 | 0.00 | 0.02 |
| 19q#209334_209337 | 19 | 36561816-36690656   | 128841  |                                                     | 0 | 0.41 | 0.00 | 0.02 |
| 1p#10216_10229    | 1  | 118598907-119105374 | 506468  |                                                     | 0 | 0.41 | 0.00 | 0.02 |
| 4q#60836_60862    | 4  | 95953117-96198590   | 245474  | BMPR1B                                              | 0 | 0.41 | 0.00 | 0.02 |
| 4q#64506_64550    | 4  | 151164710-151677209 | 512500  | DCAMKL2, LRBA                                       | 0 | 0.41 | 0.00 | 0.02 |
| 4q#64598_64607    | 4  | 152076420-152187271 | 110852  | LRBA                                                | 0 | 0.41 | 0.00 | 0.02 |
| 19p#208578_208616 | 19 | 18000193-18251758   | 251566  | 1, PIK3R2, IFI30, FKSG24, RAB3A, PDE4C, AK095384, A | 0 | 0.41 | 0.00 | 0.02 |
| 4q#58540_58544    | 4  | 70353306-70401904   | 48599   |                                                     | 0 | 0.41 | 0.00 | 0.02 |
| 4q#60756_60775    | 4  | 94912134-95099988   | 187855  | GRID2                                               | 0 | 0.41 | 0.00 | 0.02 |
| 4q#60789_60822    | 4  | 95443861-95820977   | 377117  | BC014345, SMARCAD1, PGDS, PDLIM5                    | 0 | 0.41 | 0.00 | 0.02 |
| 5p#69527_69532    | 5  | 32098707-32153004   | 54298   | PDZD2                                               | 0 | 0.41 | 0.00 | 0.02 |
| 7p#94358_94361    | 7  | 1947871-1973944     | 26074   | MAD1L1                                              | 0 | 0.41 | 0.00 | 0.02 |
| 7p#94362_94367    | 7  | 1981179-2030948     | 49770   | MAD1L1                                              | 0 | 0.41 | 0.00 | 0.02 |
| 15q#180012_180020 | 15 | 41682937-41738012   | 55076   | STRC, BC050263, CATSPER2                            | 0 | 0.41 | 0.00 | 0.02 |
| 7p#94266_94285    | 7  | 1180344-1355114     | 174771  | 991986, MICAL-L2, AB037861, AK128368, AK093809, M   | 0 | 0.41 | 0.00 | 0.02 |
| 1p#8370_8387      | 1  | 94043653-94173790   | 130138  | DNTTIP2, GCLM, ABCA4                                | 0 | 0.41 | 0.00 | 0.02 |
| 5p#70488_70501    | 5  | 43522837-43627383   | 104547  | FLJ32363, PAIP1, AK096668                           | 0 | 0.41 | 0.00 | 0.02 |
| 6p#81630_81637    | 6  | 9878625-9932751     | 54127   | AF520803                                            | 0 | 0.41 | 0.00 | 0.02 |
| 6p#81653_81671    | 6  | 10097246-10277178   | 179933  | OFCC1, AF520801                                     | 0 | 0.41 | 0.00 | 0.02 |
| 6p#81717_81923    | 6  | 10672237-13059520   | 2387284 | ELOVL2, BC038757, AK058186, HERV-FRD, NEDD9, B      | 0 | 0.41 | 0.00 | 0.02 |
| 7p#94543_94551    | 7  | 3554748-3608113     | 53366   | SDK1                                                | 0 | 0.41 | 0.00 | 0.02 |
| 7p#94552_94556    | 7  | 3614136-3657771     | 43636   | SDK1                                                | 0 | 0.41 | 0.00 | 0.02 |
| 7p#94622_94634    | 7  | 4260544-4420831     | 160288  |                                                     | 0 | 0.41 | 0.00 | 0.02 |
| 7p#94652_94666    | 7  | 4575500-4679435     | 103936  | FOXK1, KIAA0415, FLJ10324                           | 0 | 0.41 | 0.00 | 0.02 |
| 7p#94753_94756    | 7  | 5404880-5425417     | 20538   | FSCN1                                               | 0 | 0.41 | 0.00 | 0.02 |
| 7p#96448_96450    | 7  | 26971819-26975411   | 3593    | HoxA9                                               | 0 | 0.41 | 0.00 | 0.02 |
| 4q#64359_64361    | 4  | 149206038-149234144 | 28107   | ARHGAP10                                            | 0 | 0.41 | 0.00 | 0.02 |
| 1p#10197_10204    | 1  | 118321430-118377943 | 56514   | SPAG17                                              | 0 | 0.41 | 0.00 | 0.02 |
| 1p#10205_10213    | 1  | 118384604-118501537 | 116934  | SPAG17                                              | 0 | 0.41 | 0.00 | 0.02 |
| 4q#60823_60835    | 4  | 95826323-95942588   | 116266  | PDLIM5                                              | 0 | 0.41 | 0.00 | 0.02 |
| 7p#94355_94357    | 7  | 1913800-1933626     | 19827   | MAD1L1                                              | 0 | 0.41 | 0.00 | 0.02 |
| 11q#143728_143741 | 11 | 57424810-57581719   | 156910  | OR9Q1                                               | 0 | 0.41 | 0.00 | 0.02 |
| 11q#143823_143825 | 11 | 58236785-58254206   | 17422   | GLYAT                                               | 0 | 0.41 | 0.00 | 0.02 |
| 1p#7547_7623      | 1  | 84288151-85006561   | 718411  | 13, DNASE2B, BXDC5, GNG5, SPATA1, CTBS, C1orf18     | 0 | 0.41 | 0.00 | 0.02 |
| 1p#8388_8450      | 1  | 94186344-94975021   | 788678  | ABCA4, ARHGAP29, ABCD3, F3, AK024564, BC030750      | 0 | 0.41 | 0.00 | 0.02 |
| 1p#6512_6526      | 1  | 68563579-68675334   | 111756  | RPE65, DEPDC1, BC016787                             | 0 | 0.41 | 0.00 | 0.02 |
| 1p#7624_7628      | 1  | 85012134-85043857   | 31724   | EDG7                                                | 0 | 0.41 | 0.00 | 0.02 |
| 1p#10214_10215    | 1  | 118529216-118558518 | 29303   |                                                     | 0 | 0.41 | 0.00 | 0.02 |
| 3q#53485_53501    | 3  | 194763875-194903305 | 139431  | OPA1                                                | 0 | 0.41 | 0.00 | 0.02 |
| 5p#69410_69426    | 5  | 30493484-30997233   | 503750  |                                                     | 0 | 0.41 | 0.00 | 0.02 |
| 5p#69518_69526    | 5  | 32019048-32088455   | 69408   | PDZD2                                               | 0 | 0.41 | 0.00 | 0.02 |
| 6p#81619_81629    | 6  | 9742388-9868679     | 126292  | AF520803                                            | 0 | 0.41 | 0.00 | 0.02 |
| 6p#81970_82010    | 6  | 13463935-13817981   | 354047  | GFOD1, SIRT5, NOLT, AF329101, RANBP9                | 0 | 0.41 | 0.00 | 0.02 |
| 6p#82024_82118    | 6  | 13949149-15572072   | 1622924 | AF329101, RNF182, CD83, JARID2                      | 0 | 0.41 | 0.00 | 0.02 |

|            |        |    |                     |        |                                                     |             |             |      |      |
|------------|--------|----|---------------------|--------|-----------------------------------------------------|-------------|-------------|------|------|
| 6p#82119   | 82141  | 6  | 15584126-15939377   | 355252 | JARID2, DTNBP1                                      | 0           | 0.41        | 0.00 | 0.02 |
| 6p#82142   | 82165  | 6  | 15979132-16362778   | 383647 | MYLIP, GMPR                                         | 0           | 0.41        | 0.00 | 0.02 |
| 6p#82166   | 82211  | 6  | 16373136-16784661   | 411526 | GMPR, ATXN1                                         | 0           | 0.41        | 0.00 | 0.02 |
| 6p#82257   | 82299  | 6  | 17520896-17919869   | 398974 | CAP2, FAM8A1, NUP153, AJ291579, KIF13A              | 0           | 0.41        | 0.00 | 0.02 |
| 6p#82639   | 82671  | 6  | 22700624-23514641   | 814018 | CR614876                                            | 0           | 0.41        | 0.00 | 0.02 |
| 6p#82672   | 82689  | 6  | 23544950-23968060   | 423111 |                                                     | 0           | 0.41        | 0.00 | 0.02 |
| 7p#94286   | 94287  | 7  | 1355712-1355801     | 90     | MAFK                                                | 0           | 0.41        | 0.00 | 0.02 |
| 7p#94288   | 94354  | 7  | 1359084-1899889     | 540806 | MGC9712, MGC10911, AK054665, MAD1L1                 | 0           | 0.41        | 0.00 | 0.02 |
| 7p#94433   | 94437  | 7  | 2520185-2541941     | 21757  | AMZ1, AK127523, GNA12                               | 0           | 0.41        | 0.00 | 0.02 |
| 7p#94438   | 94459  | 7  | 2554758-2740825     | 186068 | GNA12, CARD11                                       | 0           | 0.41        | 0.00 | 0.02 |
| 7p#94460   | 94466  | 7  | 2748559-2798754     | 50196  | CARD11                                              | 0           | 0.41        | 0.00 | 0.02 |
| 7p#94467   | 94473  | 7  | 2804580-2856862     | 52283  | CARD11                                              | 0           | 0.41        | 0.00 | 0.02 |
| 7p#94493   | 94542  | 7  | 3109008-3546151     | 437144 | SDK1                                                | 0           | 0.41        | 0.00 | 0.02 |
| 7p#94557   | 94586  | 7  | 3662837-3898369     | 235533 | SDK1                                                | 0           | 0.41        | 0.00 | 0.02 |
| 7p#94635   | 94650  | 7  | 4427761-4558896     | 131136 | BC038434, FOXK1                                     | 0           | 0.41        | 0.00 | 0.02 |
| 7p#94667   | 94668  | 7  | 4683796-4689552     | 5757   | FLJ10324                                            | 0           | 0.41        | 0.00 | 0.02 |
| 7p#94698   | 94703  | 7  | 4959896-5015030     | 55135  | WIPI2                                               | 0           | 0.41        | 0.00 | 0.02 |
| 7p#94757   | 94851  | 7  | 5433110-6304874     | 871765 | A, PMS2, JTV1, EIF2AK1, BC044242, USP42, PSCD3, N   | 0           | 0.41        | 0.00 | 0.02 |
| 7p#94852   | 94867  | 7  | 6311767-6414987     | 103221 | BC044242, ZDHHC4, C7orf26                           | 0           | 0.41        | 0.00 | 0.02 |
| 7p#94868   | 94872  | 7  | 6421519-6446789     | 25271  | C7orf26, AL133055                                   | 0           | 0.41        | 0.00 | 0.02 |
| 7p#94873   | 94874  | 7  | 6453001-6463330     | 10330  |                                                     | 0           | 0.41        | 0.00 | 0.02 |
| 7p#94875   | 94879  | 7  | 6468542-6500143     | 31602  | AL832182, AK123300                                  | 0           | 0.41        | 0.00 | 0.02 |
| 7p#94880   | 94883  | 7  | 6505070-6528782     | 23713  | ZNF12, BC041364                                     | 0           | 0.41        | 0.00 | 0.02 |
| 7p#96445   | 96447  | 7  | 26959012-26967725   | 8714   | HOXA6, AK091933, HOXA7                              | 0           | 0.41        | 0.00 | 0.02 |
| 7p#96451   | 96455  | 7  | 26976021-26987201   | 11181  | HOXA9, U41813, HOXA10                               | 0           | 0.41        | 0.00 | 0.02 |
| 11q#143810 | 143818 | 11 | 58094577-58167973   | 73397  | LPXN, BC034230, ZFP91                               | 0           | 0.41        | 0.00 | 0.02 |
| 11q#143819 | 143822 | 11 | 58178106-58226741   | 48636  |                                                     | 0           | 0.41        | 0.00 | 0.02 |
| 11q#143826 | 143829 | 11 | 58260580-58329026   | 68447  |                                                     | 0           | 0.41        | 0.00 | 0.02 |
| 19p#208553 | 208577 | 19 | 17790022-17985934   | 195913 | JAK3, RPL18A, SLC5A5, J03909, LOC115098, KCNN1, 4   | 0           | 0.41        | 0.00 | 0.02 |
| 19q#212457 | 212467 | 19 | 63636407-63691655   | 55249  | MF132, BX649129, FLJ45850, ZNF324, ZNF446, AL8339   | 0           | 0.41        | 0.00 | 0.02 |
| 22q#225251 | 225268 | 22 | 48672939-48817751   | 144813 | PIM3, BC032894, FLJ41993, MLC1                      | 0           | 0.41        | 0.00 | 0.02 |
| 11q#144965 | 144966 | 11 | 66809520-66816515   | 6996   | ADRBK1, ANKRD13D                                    | 0.499123719 | 0.440459431 | 0.05 | 0.10 |
| 11q#144985 | 144991 | 11 | 66926401-66952827   | 26427  | AK098311, TBC1D10C, AB037815, RPS6KB2               | 0.499123719 | 0.440459431 | 0.05 | 0.10 |
| 11q#144992 | 144997 | 11 | 66960462-66977781   | 17320  | PTPRCAP, CORO1B, BC033167                           | 0.499123719 | 0.440459431 | 0.05 | 0.10 |
| 11q#146154 | 146155 | 11 | 78090143-78100691   | 10549  | BX640737, AB037723                                  | 0.499123719 | 0.440459431 | 0.05 | 0.10 |
| 11q#146148 | 146153 | 11 | 78005966-78077557   | 71592  | BX640737                                            | 0.499123719 | 0.440459431 | 0.05 | 0.10 |
| 11q#146221 | 146223 | 11 | 79188820-79242388   | 53569  |                                                     | 0.499123719 | 0.440459431 | 0.05 | 0.10 |
| 1q#15552   | 15562  | 1  | 200637253-200782080 | 144828 | C1orf157, SOX13                                     | 0.499123719 | 0.440459431 | 0.05 | 0.10 |
| 1q#15906   | 15936  | 1  | 203666102-204032747 | 366646 | C4BPA, CD55, CR2                                    | 0.499123719 | 0.440459431 | 0.05 | 0.10 |
| 1q#15803   | 15809  | 1  | 202972092-203034136 | 62045  | SRGAP2, IKBKE                                       | 0.499123719 | 0.440459431 | 0.05 | 0.10 |
| 1q#15801   | 15802  | 1  | 202928411-202959712 | 31302  | SRGAP2                                              | 0.499123719 | 0.440459431 | 0.05 | 0.10 |
| 1q#15810   | 15833  | 1  | 203040278-203202812 | 162535 | IKBKE, RASSF5, LGTN, DYRK3                          | 0.499123719 | 0.440459431 | 0.05 | 0.10 |
| 1q#15873   | 15905  | 1  | 203482758-203658369 | 175612 | AIM3, FIGR, FCAMR, C1orf116, YOD1, PFKFB2, C4BPA    | 0.499123719 | 0.440459431 | 0.05 | 0.10 |
| 1q#15834   | 15872  | 1  | 203210762-203479112 | 268351 | RK3, BC037269, MAPKAPK2, IL10, IL19, IL20, IL24, FA | 0.499123719 | 0.440459431 | 0.05 | 0.10 |
| 17q#198365 | 198368 | 17 | 55106815-55129503   | 22689  | CLTC, PTRH2                                         | 0.527128556 | 0.48097315  | 0.07 | 0.12 |
| 8q#111083  | 111085 | 8  | 47740011-47792940   | 52930  |                                                     | 0.527128556 | 0.48097315  | 0.07 | 0.12 |
| 17q#198369 | 198372 | 17 | 55137260-55163653   | 26394  | PTRH2, TMEM49                                       | 0.527128556 | 0.48097315  | 0.07 | 0.12 |
| 11q#146078 | 146086 | 11 | 77410737-77458718   | 47982  | KCTD14, THRSP, NDUFC2                               | 0.527128556 | 0.48097315  | 0.07 | 0.12 |
| 11q#146087 | 146088 | 11 | 77466993-77475923   | 8931   | NDUFC2                                              | 0.527128556 | 0.48097315  | 0.07 | 0.12 |
| 11q#146089 | 146106 | 11 | 77484433-77595127   | 110695 | ALG8, AK124949, LOC283219, AK056231                 | 0.527128556 | 0.48097315  | 0.07 | 0.12 |
| 11q#146137 | 146139 | 11 | 77881751-77900877   | 19127  | NARS2                                               | 0.527128556 | 0.48097315  | 0.07 | 0.12 |
| 16p#186702 | 186703 | 16 | 4726037-4732273     | 6237   | LOC146562                                           | Inf         | 0.511313131 | 0.03 | 0.00 |
| 14q#177920 | 177923 | 14 | 106223137-106240402 | 17266  | Z47244                                              | Inf         | 0.511313131 | 0.03 | 0.00 |
| 17q#196451 | 196458 | 17 | 35742720-35775233   | 32514  | RARA, GJC1, AK098252                                | Inf         | 0.511313131 | 0.03 | 0.00 |
| 17q#195449 | 195452 | 17 | 25790102-25816199   | 26098  | CPD                                                 | Inf         | 0.511313131 | 0.03 | 0.00 |

|                   |    |                     |        |                                                   |     |             |      |      |
|-------------------|----|---------------------|--------|---------------------------------------------------|-----|-------------|------|------|
| 16p#186697_186701 | 16 | 4679054-4717818     | 38765  | MGRN1, NUDT16L1, ANKS3                            | Inf | 0.511313131 | 0.03 | 0.00 |
| 16p#186704_186717 | 16 | 4736324-4805782     | 69459  | DC146562, ZNF500, AK128595, FLJ25410, ROGDI, N-PA | Inf | 0.511313131 | 0.03 | 0.00 |
| 16p#186512_186527 | 16 | 3241774-332430      | 90657  | MEFV, AK127383, ZNF263, AF251050, TIGD7, ZNF75A   | Inf | 0.511313131 | 0.03 | 0.00 |
| 16p#186631_186632 | 16 | 4204336-4214374     | 10039  | AL832361                                          | Inf | 0.511313131 | 0.03 | 0.00 |
| 16p#186633_186637 | 16 | 4226109-4247745     | 21637  | AL832361, AK094828, TFP4                          | Inf | 0.511313131 | 0.03 | 0.00 |
| 16p#186638_186648 | 16 | 4252044-4327623     | 75580  | TFAP4, AK126918, GLIS2                            | Inf | 0.511313131 | 0.03 | 0.00 |
| 16p#186620_186630 | 16 | 4083178-4187804     | 104627 | ADCY9, AL832361                                   | Inf | 0.511313131 | 0.03 | 0.00 |
| 17q#195919_195943 | 17 | 30443456-30636729   | 193274 | 1, RAD51L3, FNDC8, NLE1, UNC45B, AMAC1, AK09712   | Inf | 0.511313131 | 0.03 | 0.00 |
| 17q#196189_196192 | 17 | 33262754-33323031   | 60278  | AK094896                                          | Inf | 0.511313131 | 0.03 | 0.00 |
| 16p#187460_187470 | 16 | 13923497-14061860   | 138364 | ERCC4                                             | Inf | 0.511313131 | 0.03 | 0.00 |
| 1q#10468_10489    | 1  | 143778321-143963591 | 185271 | AF419616, PRKAB2, FMO5, CHD1L                     | Inf | 0.511313131 | 0.03 | 0.00 |
| 17q#195908_195918 | 17 | 30356174-30438713   | 82540  | AK127668, RFFL                                    | Inf | 0.511313131 | 0.03 | 0.00 |
| 17q#195884_195907 | 17 | 29973267-30346602   | 373336 | TMEM132E, CCT6B, CCDC16, LIG3                     | Inf | 0.511313131 | 0.03 | 0.00 |
| 16p#187737_187768 | 16 | 17761921-18751926   | 990006 | AK023376, AF116698, RPS15A, ARL6IP, SMG1          | Inf | 0.511313131 | 0.03 | 0.00 |
| 16p#187679_187736 | 16 | 17081126-17733983   | 652858 | XYLT1                                             | Inf | 0.511313131 | 0.03 | 0.00 |
| 16p#187769_187770 | 16 | 18760527-18766731   | 6205   | SMG1                                              | Inf | 0.511313131 | 0.03 | 0.00 |
| 16p#187771_187773 | 16 | 18772626-18808869   | 36244  | SMG1                                              | Inf | 0.511313131 | 0.03 | 0.00 |
| 16p#187858_187911 | 16 | 19547433-20234339   | 686907 | SC16824, AF202640, MGC35048, GPRC5B, GPR139, G    | Inf | 0.511313131 | 0.03 | 0.00 |
| 16p#187945_187946 | 16 | 20631832-20639823   | 7992   | DNAH3, LOC57146                                   | Inf | 0.511313131 | 0.03 | 0.00 |
| 16p#187999_188007 | 16 | 21055287-21110406   | 55120  |                                                   | Inf | 0.511313131 | 0.03 | 0.00 |
| 16p#187457_187459 | 16 | 13892890-13917152   | 24263  |                                                   | Inf | 0.511313131 | 0.03 | 0.00 |
| 16p#187471_187505 | 16 | 14068516-14333411   | 264896 | MKL2                                              | Inf | 0.511313131 | 0.03 | 0.00 |
| 1q#10490_10506    | 1  | 143976658-144188341 | 211684 | CHD1L, AF419616                                   | Inf | 0.511313131 | 0.03 | 0.00 |
| 1q#10547_10553    | 1  | 144565205-144603498 | 38294  | AF419616, GJA8                                    | Inf | 0.511313131 | 0.03 | 0.00 |
| 1q#14573_14599    | 1  | 187216480-187929247 | 712768 | BC042042                                          | Inf | 0.511313131 | 0.03 | 0.00 |
| 1q#14609_14622    | 1  | 188299952-188666961 | 367010 | BC042094                                          | Inf | 0.511313131 | 0.03 | 0.00 |
| 1q#14641_14649    | 1  | 188984152-189048120 | 63969  | RGS21                                             | Inf | 0.511313131 | 0.03 | 0.00 |
| 16p#188036_188056 | 16 | 21501073-21647387   | 146315 | DREV1, OTOA                                       | Inf | 0.511313131 | 0.03 | 0.00 |
| 16p#188057_188058 | 16 | 21744993-21854140   | 109148 |                                                   | Inf | 0.511313131 | 0.03 | 0.00 |
| 16p#187671_187678 | 16 | 16841128-17065117   | 223990 |                                                   | Inf | 0.511313131 | 0.03 | 0.00 |
| 17q#195880_195883 | 17 | 29941664-29965720   | 24057  | TMEM132E                                          | Inf | 0.511313131 | 0.03 | 0.00 |
| 16p#186896_186937 | 16 | 6846484-7225847     | 379364 | A2BP1                                             | Inf | 0.511313131 | 0.03 | 0.00 |
| 16p#186866_186895 | 16 | 6590737-6836675     | 245939 | A2BP1                                             | Inf | 0.511313131 | 0.03 | 0.00 |
| 16p#187441_187456 | 16 | 13422219-13869446   | 447228 |                                                   | Inf | 0.511313131 | 0.03 | 0.00 |
| 1q#14535_14572    | 1  | 186838656-187191348 | 352693 | FAM5C                                             | Inf | 0.511313131 | 0.03 | 0.00 |
| 1q#14413_14419    | 1  | 183689150-183806401 | 117252 | PLA2G4A                                           | Inf | 0.511313131 | 0.03 | 0.00 |
| 1q#14406_14412    | 1  | 183631855-183680274 | 48420  | PLA2G4A                                           | Inf | 0.511313131 | 0.03 | 0.00 |
| 16p#188072_188081 | 16 | 21949761-22030061   | 80301  | BC027604, AK098260                                | Inf | 0.511313131 | 0.03 | 0.00 |
| 16p#187947_187966 | 16 | 20646960-20768511   | 121552 | THUMPDI, ACSM3, EXOD1, LOC81691                   | Inf | 0.511313131 | 0.03 | 0.00 |
| 16p#188008_188029 | 16 | 21116205-21258078   | 141874 | ZP2, ANKS4B, CRYM, AK123760                       | Inf | 0.511313131 | 0.03 | 0.00 |
| 16p#188121_188128 | 16 | 22553207-22750152   | 196946 | HS3ST2                                            | Inf | 0.511313131 | 0.03 | 0.00 |
| 16p#188059_188070 | 16 | 21858880-21925459   | 66580  | UQCRC2, BC021724, C16orf65                        | Inf | 0.511313131 | 0.03 | 0.00 |
| 16p#187996_187998 | 16 | 21030410-21047003   | 16594  | DNAH3                                             | Inf | 0.511313131 | 0.03 | 0.00 |
| 16p#188129_188183 | 16 | 22758810-23324935   | 566126 | HS3ST2, AB033029, USP31, SCNN1G, SCNN1B, COG7     | Inf | 0.511313131 | 0.03 | 0.00 |
| 16p#188082_188100 | 16 | 22040400-22192495   | 152096 | AK098260, AK128606, EEF2K                         | Inf | 0.511313131 | 0.03 | 0.00 |
| 16p#187967_187981 | 16 | 20776836-20896662   | 119827 | BX648185, DCUN1D3, LOC57149, DNAH3                | Inf | 0.511313131 | 0.03 | 0.00 |
| 16p#188030_188035 | 16 | 21382561-21492971   | 110411 | BC090929                                          | Inf | 0.511313131 | 0.03 | 0.00 |
| 16p#187982_187995 | 16 | 20903874-21024125   | 120252 | DNAH3                                             | Inf | 0.511313131 | 0.03 | 0.00 |
| 16p#188488_188496 | 16 | 26759958-26983231   | 223274 |                                                   | Inf | 0.511313131 | 0.03 | 0.00 |
| 16p#188508_188514 | 16 | 27132815-27185664   | 52850  | JMJD5, NSMCE1                                     | Inf | 0.511313131 | 0.03 | 0.00 |
| 16p#188571_188577 | 16 | 27684464-27732918   | 48455  | KIAA0556, AK128775, MGC18079                      | Inf | 0.511313131 | 0.03 | 0.00 |
| 16p#187637_187653 | 16 | 16005936-16143022   | 137087 | ABCC1                                             | Inf | 0.511313131 | 0.03 | 0.00 |
| 16p#188185_188273 | 16 | 23344661-24059983   | 715323 | IDUFAB1, FLJ21816, DCTN5, AK022200, AB209179, PL  | Inf | 0.511313131 | 0.03 | 0.00 |
| 16p#187537_187538 | 16 | 14817706-14876402   | 58697  | BC008178, NOMO1                                   | Inf | 0.511313131 | 0.03 | 0.00 |
| 16p#187506_187521 | 16 | 14351678-14557073   | 205396 | PARN                                              | Inf | 0.511313131 | 0.03 | 0.00 |

|                   |    |                     |         |                                                    |     |             |      |      |
|-------------------|----|---------------------|---------|----------------------------------------------------|-----|-------------|------|------|
| 16p#187539_187545 | 16 | 14956177-15023080   | 66904   | KIAA0251                                           | Inf | 0.511313131 | 0.03 | 0.00 |
| 16p#187522_187536 | 16 | 14567002-14687695   | 120694  | PARN, BFAR, PLA2G10                                | Inf | 0.511313131 | 0.03 | 0.00 |
| 16p#188685_188692 | 16 | 28915840-29041236   | 125397  | BX647358, BC042920                                 | Inf | 0.511313131 | 0.03 | 0.00 |
| 16p#186355_186380 | 16 | 2171839-2317101     | 145263  | CASKIN1, GBL, BC002330, E4F1, DCI, RNPS1, ABCA3    | Inf | 0.511313131 | 0.03 | 0.00 |
| 1q#14623_14640    | 1  | 188684853-188959603 | 274751  | BC042094, RGS18                                    | Inf | 0.511313131 | 0.03 | 0.00 |
| 1q#14664_14681    | 1  | 189286469-189487886 | 201418  | RGS13                                              | Inf | 0.511313131 | 0.03 | 0.00 |
| 1q#17466_17470    | 1  | 224246076-224276644 | 30569   | C1orf142                                           | Inf | 0.511313131 | 0.03 | 0.00 |
| 1q#14650_14663    | 1  | 189058693-189280051 | 221359  | RGS21, RGS1                                        | Inf | 0.511313131 | 0.03 | 0.00 |
| 1q#17462_17465    | 1  | 224227419-224237306 | 9888    | JMJD4, C1orf142                                    | Inf | 0.511313131 | 0.03 | 0.00 |
| 1q#13908_13932    | 1  | 178086134-178364584 | 278451  | CACNA1E                                            | Inf | 0.511313131 | 0.03 | 0.00 |
| 1q#13822_13900    | 1  | 177071709-177906492 | 834784  | 6, XPR1, AB046834, AK056657, STX6, MR1, CR602405   | Inf | 0.511313131 | 0.03 | 0.00 |
| 1q#14420_14460    | 1  | 183844770-184755731 | 910962  | C1orf99                                            | Inf | 0.511313131 | 0.03 | 0.00 |
| 1q#14377_14405    | 1  | 183323060-183624030 | 300971  | PTGS2, PLA2G4A                                     | Inf | 0.511313131 | 0.03 | 0.00 |
| 1q#14706_14752    | 1  | 189810865-190610563 | 799699  | CDC73                                              | Inf | 0.511313131 | 0.03 | 0.00 |
| 1q#14682_14684    | 1  | 189495456-189512013 | 16558   | RGS2                                               | Inf | 0.511313131 | 0.03 | 0.00 |
| 16p#189083_189089 | 16 | 34143290-34242154   | 98865   | AL833480                                           | Inf | 0.511313131 | 0.03 | 0.00 |
| 16p#188563_188570 | 16 | 27619825-27677906   | 58082   | KIAA0556                                           | Inf | 0.511313131 | 0.03 | 0.00 |
| 16p#188107_188119 | 16 | 22243998-22338093   | 94096   | POLR3E, CDR2                                       | Inf | 0.511313131 | 0.03 | 0.00 |
| 16p#186162_186175 | 16 | 944663-1054094      | 109432  | FLJ12681, AK125201, SOX8                           | Inf | 0.511313131 | 0.03 | 0.00 |
| 16p#188274_188285 | 16 | 24071478-24158521   | 87044   | PRKCB1                                             | Inf | 0.511313131 | 0.03 | 0.00 |
| 16q#189299_189320 | 16 | 46940480-47153546   | 213067  | LONPL, AK056051, SIAH1, BC044920, N4BP1            | Inf | 0.511313131 | 0.03 | 0.00 |
| 16q#189294_189298 | 16 | 46887437-46935724   | 48288   | LONPL                                              | Inf | 0.511313131 | 0.03 | 0.00 |
| 16p#187546_187597 | 16 | 15034210-15683506   | 649297  | 51, NTAN1, RRN3, AK027135, MPV17L, C16orf45, LKAF  | Inf | 0.511313131 | 0.03 | 0.00 |
| 16p#188659_188666 | 16 | 28769032-28804697   | 35666   | BX647358, SH2B, ATP2A1                             | Inf | 0.511313131 | 0.03 | 0.00 |
| 16p#188679_188684 | 16 | 28874835-28906458   | 31624   | NFATC2IP, BX647358, SPIN1, LAT                     | Inf | 0.511313131 | 0.03 | 0.00 |
| 1q#17471_17480    | 1  | 224285323-224374166 | 88844   | MPN2                                               | Inf | 0.511313131 | 0.03 | 0.00 |
| 1q#13373_13387    | 1  | 172087089-172278646 | 191558  | TNR, X98085, Y13359                                | Inf | 0.511313131 | 0.03 | 0.00 |
| 1q#11822_11844    | 1  | 155922831-156104653 | 181823  | IGSF4B, DARC, FCER1A                               | Inf | 0.511313131 | 0.03 | 0.00 |
| 1q#13933_14019    | 1  | 178379899-179336703 | 956805  | 5, AK128015, GLUL, TEDDM1, C1orf120, RGS2, RGS1    | Inf | 0.511313131 | 0.03 | 0.00 |
| 1q#11768_11821    | 1  | 155452599-155904227 | 451629  | 41, OR6K6, OR6N2, MNDA, PYHIN1, AK094968, IFI16, 4 | Inf | 0.511313131 | 0.03 | 0.00 |
| 1q#13775_13821    | 1  | 176619044-177062564 | 443521  | TOR1AIP1, CEP350, QSCN6, CR597598, LHX4, ACBD6     | Inf | 0.511313131 | 0.03 | 0.00 |
| 1q#13901_13907    | 1  | 177918356-178047367 | 129012  | AF387616                                           | Inf | 0.511313131 | 0.03 | 0.00 |
| 1q#14685_14705    | 1  | 189515914-189806633 | 290720  | UCHL5, TROVE2, AY205314, GLRX2                     | Inf | 0.511313131 | 0.03 | 0.00 |
| 1q#17484_17552    | 1  | 224430231-224937051 | 506821  | RPL55, AK094778, GUK1, GJA12, AK057440, C1orf69, C | Inf | 0.511313131 | 0.03 | 0.00 |
| 16p#189081_189082 | 16 | 34124297-34129822   | 5526    |                                                    | Inf | 0.511313131 | 0.03 | 0.00 |
| 15q#185162_185167 | 15 | 90624269-90675830   | 51562   | BC043379                                           | Inf | 0.511313131 | 0.03 | 0.00 |
| 15q#185199_185234 | 15 | 90973548-91287299   | 313752  | LOC400451, BC110328, BC016011, CR627422, CHD2      | Inf | 0.511313131 | 0.03 | 0.00 |
| 10q#134028_134158 | 10 | 78007926-79391104   | 1383179 | KCNMA1, BC067888, DLG5, AF194537                   | Inf | 0.511313131 | 0.03 | 0.00 |
| 10q#134166_134247 | 10 | 79454397-80662474   | 1208078 | 194537, RPS24, AK097674, AF086162, AK098249, BC0   | Inf | 0.511313131 | 0.03 | 0.00 |
| 16p#188101_188106 | 16 | 22202398-22237563   | 35166   | EEF2K, POLR3E                                      | Inf | 0.511313131 | 0.03 | 0.00 |
| 16p#188497_188507 | 16 | 26987044-27126807   | 139764  | TNT, JMJD5                                         | Inf | 0.511313131 | 0.03 | 0.00 |
| 16p#188542_188553 | 16 | 27419688-27507625   | 87938   | GTF3C1, KIAA0556                                   | Inf | 0.511313131 | 0.03 | 0.00 |
| 16p#188578_188582 | 16 | 27741863-27776935   | 35073   | MGC18079                                           | Inf | 0.511313131 | 0.03 | 0.00 |
| 16p#188286_188303 | 16 | 24168190-24331895   | 163706  | CACNG3                                             | Inf | 0.511313131 | 0.03 | 0.00 |
| 16p#188482_188487 | 16 | 26530603-26717986   | 187384  |                                                    | Inf | 0.511313131 | 0.03 | 0.00 |
| 16p#188537_188541 | 16 | 27379532-27411351   | 31820   | CR627430, GTF3C1                                   | Inf | 0.511313131 | 0.03 | 0.00 |
| 16p#188554_188562 | 16 | 27519095-27606536   | 87442   | KIAA0556                                           | Inf | 0.511313131 | 0.03 | 0.00 |
| 16p#188417_188481 | 16 | 25608304-26483991   | 875688  | HS3ST4                                             | Inf | 0.511313131 | 0.03 | 0.00 |
| 16p#186200_186223 | 16 | 1215396-1352866     | 137471  | AF175522, TPSD1, UBE2I, BAIAP3, GNPTG              | Inf | 0.511313131 | 0.03 | 0.00 |
| 16p#186196_186199 | 16 | 1195632-1211711     | 16080   | CACNA1H                                            | Inf | 0.511313131 | 0.03 | 0.00 |
| 16p#186224_186225 | 16 | 1361109-1364920     | 3812    | C16orf28                                           | Inf | 0.511313131 | 0.03 | 0.00 |
| 1q#14753_14754    | 1  | 190638750-190663587 | 24838   |                                                    | Inf | 0.511313131 | 0.03 | 0.00 |
| 1q#17481_17482    | 1  | 224386550-224407723 | 21174   |                                                    | Inf | 0.511313131 | 0.03 | 0.00 |
| 1q#10618_10651    | 1  | 146803140-147066398 | 263259  | 45A, PLEKHO1, ANP32E, CA14, APH1A, BC068606, C1    | Inf | 0.511313131 | 0.03 | 0.00 |
| 1q#10654_10684    | 1  | 147079620-147318979 | 239360  | MRPS21, PRPF3, KIAA0460, TARSL1, ECM1              | Inf | 0.511313131 | 0.03 | 0.00 |

|                   |    |                     |         |                                                    |     |             |      |      |
|-------------------|----|---------------------|---------|----------------------------------------------------|-----|-------------|------|------|
| 1q#13024_13036    | 1  | 168463722-168570517 | 106796  | KIAA0859, DNMM3                                    | Inf | 0.511313131 | 0.03 | 0.00 |
| 1q#13088_13124    | 1  | 168976284-169303039 | 326756  | DNM3, C1orf105, C1orf9                             | Inf | 0.511313131 | 0.03 | 0.00 |
| 1q#13388_13418    | 1  | 172296413-172726945 | 430533  | Y13359, RFW2                                       | Inf | 0.511313131 | 0.03 | 0.00 |
| 1q#13125_13140    | 1  | 169311583-169544719 | 233137  | C1orf9, FASLG                                      | Inf | 0.511313131 | 0.03 | 0.00 |
| 1q#13243_13372    | 1  | 170764908-172079202 | 1314295 | 095838, AB019493, AB007940, CACYBP, MRPS14, TNN    | Inf | 0.511313131 | 0.03 | 0.00 |
| 1q#13632_13640    | 1  | 175194706-175244115 | 49410   | FLJ44005, C1orf49, AK097518, FLJ35530              | Inf | 0.511313131 | 0.03 | 0.00 |
| 1q#13717_13774    | 1  | 176036300-176609510 | 573211  | 1, C1orf125, NPHS2, TDRD5, C1orf76, TOR1AIP2, TOR  | Inf | 0.511313131 | 0.03 | 0.00 |
| 1q#11845_11863    | 1  | 156120866-156334537 | 213672  | BC038194, OR10J1                                   | Inf | 0.511313131 | 0.03 | 0.00 |
| 1q#10685_10694    | 1  | 147329655-147379318 | 49664   | ADAMTSL4, MCL1, AK057901                           | Inf | 0.511313131 | 0.03 | 0.00 |
| 1q#14755_14773    | 1  | 190714904-191350085 | 635182  |                                                    | Inf | 0.511313131 | 0.03 | 0.00 |
| 1q#17553_17565    | 1  | 224945306-225090624 | 145319  | BC001193, HIST3H2A, AK091220, BC012758, AK092260   | Inf | 0.511313131 | 0.03 | 0.00 |
| 16p#188304_188415 | 16 | 24347396-25583801   | 1236406 | 9, TNRC6A, SLC5A11, ARHGAP17, BC041358, AK09783    | Inf | 0.511313131 | 0.03 | 0.00 |
| 1q#19334_19339    | 1  | 245161888-245210850 | 48963   | BC033943                                           | Inf | 0.511313131 | 0.03 | 0.00 |
| 1q#10652_10653    | 1  | 147070449-147073923 | 3475    | C1orf51                                            | Inf | 0.511313131 | 0.03 | 0.00 |
| 1q#16885_16971    | 1  | 216151537-217154660 | 1003124 | SLC30A10, EPRS, BPNT1, IARS2, AK021928, RAB3GA     | Inf | 0.511313131 | 0.03 | 0.00 |
| 1q#12846_13023    | 1  | 166372743-168457362 | 2084620 | 329, SCYL1BP1, AK056067, PRRX1, C1orf129, FMO3, I  | Inf | 0.511313131 | 0.03 | 0.00 |
| 1q#13037_13087    | 1  | 168577703-168967759 | 390057  | DNM3                                               | Inf | 0.511313131 | 0.03 | 0.00 |
| 1q#13419_13426    | 1  | 172741926-172795138 | 53213   | RFW2                                               | Inf | 0.511313131 | 0.03 | 0.00 |
| 1q#11300_11301    | 1  | 151778332-151779570 | 1239    | FLAD1, LENER                                       | Inf | 0.511313131 | 0.03 | 0.00 |
| 1q#13147_13158    | 1  | 169698887-169839795 | 140909  | TNFSF18                                            | Inf | 0.511313131 | 0.03 | 0.00 |
| 1q#13427_13631    | 1  | 172804793-175188658 | 2383866 | A2, ASTN, FAM5B, BC031234, AK074451, LZTR2, AB06   | Inf | 0.511313131 | 0.03 | 0.00 |
| 1q#13641_13716    | 1  | 175249343-176027156 | 777814  | 5530, RALGPS2, FAM20B, TOR3A, BX538317, ABL2, S    | Inf | 0.511313131 | 0.03 | 0.00 |
| 1q#18730_18735    | 1  | 239337733-239517142 | 179410  |                                                    | Inf | 0.511313131 | 0.03 | 0.00 |
| 1q#13141_13146    | 1  | 169568157-169671051 | 102895  | CEP170                                             | Inf | 0.511313131 | 0.03 | 0.00 |
| 1q#18736_18740    | 1  | 239544570-239663327 | 118758  | LRRK1                                              | Inf | 0.511313131 | 0.03 | 0.00 |
| 15q#185903_185921 | 15 | 99332800-99485019   | 152220  |                                                    | Inf | 0.511313131 | 0.03 | 0.00 |
| 15q#185928_185982 | 15 | 99545698-99958738   | 413041  | CHSY1, SELS, SNRPA1, BC043562, PCSK6, AK172827     | Inf | 0.511313131 | 0.03 | 0.00 |
| 15q#185991_186005 | 15 | 100023843-100144320 | 120478  | TARSL2, AK125787                                   | Inf | 0.511313131 | 0.03 | 0.00 |
| 16q#189245_189248 | 16 | 46251853-46279131   | 27279   | PHKB                                               | Inf | 0.511313131 | 0.03 | 0.00 |
| 16q#189249_189258 | 16 | 46291108-46448124   | 157017  | PHKB, BC039433                                     | Inf | 0.511313131 | 0.03 | 0.00 |
| 15q#185135_185137 | 15 | 90381380-90393965   | 12586   | SLCO3A1                                            | Inf | 0.511313131 | 0.03 | 0.00 |
| 15q#185138_185161 | 15 | 90400719-90618368   | 217650  | SLCO3A1, BC043379                                  | Inf | 0.511313131 | 0.03 | 0.00 |
| 15q#185168_185198 | 15 | 90694297-90955903   | 261607  | ST8SIA2, C15orf32                                  | Inf | 0.511313131 | 0.03 | 0.00 |
| 4q#58478_58487    | 4  | 69215734-69312043   | 96310   | UGT2B17, U06641                                    | Inf | 0.511313131 | 0.03 | 0.00 |
| 1q#11233_11260    | 1  | 151251940-151448208 | 196269  | L6R, X52229, SHE, TDRD10, UBE2Q1, CHRNB2, ADAF     | Inf | 0.511313131 | 0.03 | 0.00 |
| 1q#11176_11188    | 1  | 150780578-150903411 | 122834  | NUP210L                                            | Inf | 0.511313131 | 0.03 | 0.00 |
| 1q#11282_11288    | 1  | 151687895-151735179 | 47285   | X52229, PMVK, PBXIP1                               | Inf | 0.511313131 | 0.03 | 0.00 |
| 1q#11869_11876    | 1  | 156380518-156479735 | 99218   |                                                    | Inf | 0.511313131 | 0.03 | 0.00 |
| 1q#11864_11868    | 1  | 156344464-156376473 | 32010   | APCS                                               | Inf | 0.511313131 | 0.03 | 0.00 |
| 1q#18229_18242    | 1  | 233045423-233191533 | 146111  | HEATR1, ACTN2                                      | Inf | 0.511313131 | 0.03 | 0.00 |
| 1q#18260_18289    | 1  | 233363053-233668746 | 305694  | MTR, RYR2                                          | Inf | 0.511313131 | 0.03 | 0.00 |
| 1q#19034_19067    | 1  | 242754982-243118286 | 363305  | SMYD3, AB057595, TFB2M, C1orf71                    | Inf | 0.511313131 | 0.03 | 0.00 |
| 1q#19164_19215    | 1  | 243940317-244292715 | 352399  | 124520, OR2C3, C1orf150, OR2G2, BC036260, AY3582   | Inf | 0.511313131 | 0.03 | 0.00 |
| 1q#11358_11372    | 1  | 152049242-152097900 | 48659   | CLK2, HCN3, PKLR, FDPS                             | Inf | 0.511313131 | 0.03 | 0.00 |
| 1q#19068_19102    | 1  | 243123841-243411049 | 287209  | AL834246, SCCPDH, AK022825, LOC149134, AHC TF1,    | Inf | 0.511313131 | 0.03 | 0.00 |
| 1q#19103_19142    | 1  | 243420173-243721132 | 300960  | 519, ZNF695, CR597038, ZNF670, ZNF669, BC032514, 2 | Inf | 0.511313131 | 0.03 | 0.00 |
| 1q#19143_19163    | 1  | 243727635-243931105 | 203471  | VN1R5, ZNF496, CIAS1                               | Inf | 0.511313131 | 0.03 | 0.00 |
| 1q#12810_12845    | 1  | 166064793-166356582 | 291790  | BLZF1, C1orf114, BC041451, AJ237724, SLC19A2, F5,  | Inf | 0.511313131 | 0.03 | 0.00 |
| 1q#11302_11323    | 1  | 151785517-151878191 | 92675   | X52229, DCST2, DCST1, ADAM15, EFNA4, EFNA3         | Inf | 0.511313131 | 0.03 | 0.00 |
| 1q#19243_19310    | 1  | 244442266-244930639 | 488374  | OR2L13, OR2M4, OR5BF1, OR2T1                       | Inf | 0.511313131 | 0.03 | 0.00 |
| 1q#18724_18729    | 1  | 239156984-239313837 | 156854  |                                                    | Inf | 0.511313131 | 0.03 | 0.00 |
| 1q#11289_11299    | 1  | 151738128-151774015 | 35888   | PBXIP1, PYGO2, SHC1, CKS1B, FLAD1                  | Inf | 0.511313131 | 0.03 | 0.00 |
| 1q#11394_11416    | 1  | 152282610-152504376 | 221767  | L, AK126559, AY39211, MSTO1, BC092439, YY1AP1,     | Inf | 0.511313131 | 0.03 | 0.00 |
| 1q#18243_18259    | 1  | 233200341-233355110 | 154770  | ACTN2, MTR                                         | Inf | 0.511313131 | 0.03 | 0.00 |
| 1q#18290_18723    | 1  | 233677289-239133786 | 5456498 | IRM3, AK095715, FMN2, GREM2, RGS7, FH, KMO, OPI    | Inf | 0.511313131 | 0.03 | 0.00 |

|                   |    |                     |         |                                                   |             |             |      |      |
|-------------------|----|---------------------|---------|---------------------------------------------------|-------------|-------------|------|------|
| 1q#18741_18814    | 1  | 239701509-240398186 | 696678  | CEP170, BC050722, SDCCAG8, AKT3                   | Inf         | 0.511313131 | 0.03 | 0.00 |
| 1q#18815_18842    | 1  | 240426687-240733227 | 306541  | BC046644, ZNF238, LOC440742                       | Inf         | 0.511313131 | 0.03 | 0.00 |
| 9p#120504_120513  | 9  | 24300474-24577353   | 276880  |                                                   | Inf         | 0.511313131 | 0.03 | 0.00 |
| 9p#120199_120265  | 9  | 20499690-20983388   | 483699  | MLLT3, KIAA1797                                   | Inf         | 0.511313131 | 0.03 | 0.00 |
| 9p#120132_120160  | 9  | 19577317-19908720   | 331404  | SLC24A2                                           | Inf         | 0.511313131 | 0.03 | 0.00 |
| 16q#189282_189284 | 16 | 46797922-46814257   | 16336   | ABCC11                                            | Inf         | 0.511313131 | 0.03 | 0.00 |
| 16q#189259_189277 | 16 | 46466134-46748264   | 282131  | BC039433, AK091370, ABCC12, BC036378              | Inf         | 0.511313131 | 0.03 | 0.00 |
| 16q#189278_189281 | 16 | 46758431-46789668   | 31238   | ABCC11                                            | Inf         | 0.511313131 | 0.03 | 0.00 |
| 16q#189285_189293 | 16 | 46819141-46879396   | 60256   | ABCC11, AF352582, LONPL                           | Inf         | 0.511313131 | 0.03 | 0.00 |
| 1q#11877_11936    | 1  | 156486124-156882609 | 396486  | 1123, CCDC19, CR604695, TAGLN2, IGSF9, SLAMF9, A  | Inf         | 0.511313131 | 0.03 | 0.00 |
| 1q#12800_12809    | 1  | 165958802-166059484 | 100683  | NME7                                              | Inf         | 0.511313131 | 0.03 | 0.00 |
| 1q#19216_19242    | 1  | 244296502-244437195 | 140694  | TRIM58, BX537432, OR2L13                          | Inf         | 0.511313131 | 0.03 | 0.00 |
| 11q#144745_144748 | 11 | 65348085-65360267   | 12183   | FLJ30934                                          | Inf         | 0.511313131 | 0.03 | 0.00 |
| 11q#144751_144756 | 11 | 65379458-65401792   | 22335   | CFL1, AK097690, MUS81, EFEMP2, AB209121           | Inf         | 0.511313131 | 0.03 | 0.00 |
| 19q#209538_209539 | 19 | 39541682-39553983   | 12302   | GPI                                               | Inf         | 0.511313131 | 0.03 | 0.00 |
| 19q#209644_209652 | 19 | 40450622-40503289   | 52668   | LSR, USF2, HAMP, MAG, AB209170                    | Inf         | 0.511313131 | 0.03 | 0.00 |
| 11q#144749_144750 | 11 | 65371982-65376103   | 4122    | FLJ30934                                          | Inf         | 0.511313131 | 0.03 | 0.00 |
| 11q#144757_144759 | 11 | 65405644-65409692   | 4049    | CTSW, FIBP                                        | Inf         | 0.511313131 | 0.03 | 0.00 |
| 19q#209540_209568 | 19 | 39564193-39838698   | 274506  | GPI, BC006342, PDCCD2L, UBA2, AK130059, AK093495  | Inf         | 0.511313131 | 0.03 | 0.00 |
| 19q#209569_209627 | 19 | 39846983-40341988   | 495006  | 599, FLJ43870, ZNF30, FLJ38451, GRAMD1A, SCN1B, A | Inf         | 0.511313131 | 0.03 | 0.00 |
| 19q#209628_209631 | 19 | 40350432-40376709   | 26278   | FXYD5                                             | Inf         | 0.511313131 | 0.03 | 0.00 |
| 19q#209635_209643 | 19 | 40395296-40445639   | 50344   | FLJ25660, LSR                                     | Inf         | 0.511313131 | 0.03 | 0.00 |
| 1q#11937_11988    | 1  | 156890001-157271905 | 381905  | 4, CASQ1, PEA15, WDR42A, PEX19, COPA, NCSTN, N    | Inf         | 0.511313131 | 0.03 | 0.00 |
| 1q#18952_18953    | 1  | 241983282-241991562 | 8281    | AK125187                                          | Inf         | 0.511313131 | 0.03 | 0.00 |
| 1q#18954_18994    | 1  | 242000411-242407308 | 406898  | AK125187, AK095500, SMYD3                         | Inf         | 0.511313131 | 0.03 | 0.00 |
| 1q#18995_19033    | 1  | 242419536-242739150 | 319615  | SMYD3                                             | Inf         | 0.511313131 | 0.03 | 0.00 |
| 1q#18118_18125    | 1  | 231892283-231955469 | 63187   | TBCE, B3GALNT2                                    | Inf         | 0.511313131 | 0.03 | 0.00 |
| 11q#144760_144771 | 11 | 65414143-65472544   | 58402   | FOSL1, C11orf68, DRAP1, TSGA10IP                  | Inf         | 0.511313131 | 0.03 | 0.00 |
| 11q#144772_144779 | 11 | 65478019-65507182   | 29164   | TSGA10IP, SART1                                   | Inf         | 0.511313131 | 0.03 | 0.00 |
| 1q#11155_11175    | 1  | 150650667-150777051 | 126385  | 613795, AB007945, CRTC2, SLC39A1, CREB3L4, JTB,   | Inf         | 0.511313131 | 0.03 | 0.00 |
| 1q#11209_11222    | 1  | 151058042-151130451 | 72410   | BC005240, HAX1, AQP10, ATP8B2                     | Inf         | 0.511313131 | 0.03 | 0.00 |
| 1q#11223_11229    | 1  | 151135918-151209203 | 73286   | ATP8B2, IL6R                                      | Inf         | 0.511313131 | 0.03 | 0.00 |
| 1q#11230_11232    | 1  | 151220662-151245463 | 24802   | IL6R                                              | Inf         | 0.511313131 | 0.03 | 0.00 |
| 1q#11261_11281    | 1  | 151467441-151670787 | 203347  | X52229, KCNN3                                     | Inf         | 0.511313131 | 0.03 | 0.00 |
| 1q#11324_11344    | 1  | 151890549-151992895 | 102347  | FNA1, RAG1AP1, DPM3, KRTCAP2, TRIM46, MUC1, TH    | Inf         | 0.511313131 | 0.03 | 0.00 |
| 1q#11351_11357    | 1  | 152018577-152045979 | 27403   | GBA, C1orf2, SCAMP3, CLK2                         | Inf         | 0.511313131 | 0.03 | 0.00 |
| 1q#11373_11393    | 1  | 152102091-152274091 | 172001  | FDPS, RUSC1, ASH1L                                | Inf         | 0.511313131 | 0.03 | 0.00 |
| 1q#18051_18117    | 1  | 230945978-231877407 | 931430  | 040, AK058184, AK127758, AF193050, TOMM20, AL133  | Inf         | 0.511313131 | 0.03 | 0.00 |
| 1q#18126_18177    | 1  | 231965390-232521250 | 555861  | B3GALNT2, GNG4, LYST, BC045606, NID1              | Inf         | 0.511313131 | 0.03 | 0.00 |
| 1q#18178_18184    | 1  | 232534912-232573558 | 38647   | NID1                                              | Inf         | 0.511313131 | 0.03 | 0.00 |
| 1q#18185_18228    | 1  | 232593090-233040194 | 447105  | R137B, CR749523, ERO1LB, EDARADD, LGALS8, HEA     | Inf         | 0.511313131 | 0.03 | 0.00 |
| 1q#18843_18951    | 1  | 240760763-241973484 | 1212722 | 121, FAM36A, AK095297, HNRPU, AK126649, EFCAB2,   | Inf         | 0.511313131 | 0.03 | 0.00 |
| 8q#111350_111359  | 8  | 51563275-51660670   | 97396   | SNTG1                                             | 0.663207264 | 0.542830905 | 0.10 | 0.15 |
| 8q#111360_111367  | 8  | 51670362-51738426   | 68065   | SNTG1                                             | 0.663207264 | 0.542830905 | 0.10 | 0.15 |
| 11q#145169_145175 | 11 | 68633004-68740243   | 107240  | AL137479                                          | 0.656716597 | 0.561243672 | 0.12 | 0.17 |
| 11q#145165_145168 | 11 | 68591724-68620384   | 28661   | TPCN2, AL137479                                   | 0.656716597 | 0.561243672 | 0.12 | 0.17 |
| 17q#199405_199409 | 17 | 67111451-67150941   | 39491   |                                                   | 0.339929386 | 0.566165739 | 0.02 | 0.05 |
| 17q#198585_198594 | 17 | 57255236-57323696   | 68461   | BRIP1, INTS2                                      | 0.339929386 | 0.566165739 | 0.02 | 0.05 |
| 17q#199410_199413 | 17 | 67172896-67275713   | 102818  |                                                   | 0.339929386 | 0.566165739 | 0.02 | 0.05 |
| 17q#198562_198572 | 17 | 57007383-57125897   | 118515  | BRIP1                                             | 0.339929386 | 0.566165739 | 0.02 | 0.05 |
| 17q#198595_198599 | 17 | 57336828-57364820   | 27993   | INTS2                                             | 0.339929386 | 0.566165739 | 0.02 | 0.05 |
| 17q#197573_197578 | 17 | 45230625-45273598   | 42974   | MYST2, CR606231, AF515828                         | 0.339929386 | 0.566165739 | 0.02 | 0.05 |
| 17q#199343_199353 | 17 | 65646407-65728740   | 82334   | BC030961, KCNJ2                                   | 0.339929386 | 0.566165739 | 0.02 | 0.05 |
| 17q#199371_199381 | 17 | 66073811-66399765   | 325955  | BC040334                                          | 0.339929386 | 0.566165739 | 0.02 | 0.05 |
| 17q#199328_199342 | 17 | 65395757-65634679   | 238923  | BX647864, KCNJ16                                  | 0.339929386 | 0.566165739 | 0.02 | 0.05 |

|                   |    |                   |         |  |                                                 |             |             |      |      |
|-------------------|----|-------------------|---------|--|-------------------------------------------------|-------------|-------------|------|------|
| 17q#199354_199370 | 17 | 65747307-66046184 | 298878  |  | BC030961                                        | 0.339929386 | 0.566165739 | 0.02 | 0.05 |
| 17q#198621_198624 | 17 | 57678897-57750608 | 71712   |  |                                                 | 0.339929386 | 0.566165739 | 0.02 | 0.05 |
| 11q#145462_145465 | 11 | 71801423-71832168 | 30746   |  | CLPB                                            | 0.339929386 | 0.566165739 | 0.02 | 0.05 |
| 17q#199559_199562 | 17 | 69106147-69217274 | 111128  |  |                                                 | 0.339929386 | 0.566165739 | 0.02 | 0.05 |
| 17q#199577_199582 | 17 | 69475077-69621697 | 146621  |  |                                                 | 0.339929386 | 0.566165739 | 0.02 | 0.05 |
| 17q#199326_199327 | 17 | 65343441-65368203 | 24763   |  |                                                 | 0.339929386 | 0.566165739 | 0.02 | 0.05 |
| 17q#198625_198627 | 17 | 57775091-57803770 | 28680   |  |                                                 | 0.339929386 | 0.566165739 | 0.02 | 0.05 |
| 17q#199565_199575 | 17 | 69258278-69416510 | 158233  |  | C17orf54                                        | 0.339929386 | 0.566165739 | 0.02 | 0.05 |
| 17q#199563_199564 | 17 | 69239287-69246662 | 7376    |  |                                                 | 0.339929386 | 0.566165739 | 0.02 | 0.05 |
| 17q#197627_197629 | 17 | 45650882-45692778 | 41897   |  |                                                 | 0.339929386 | 0.566165739 | 0.02 | 0.05 |
| 17q#197842_197850 | 17 | 47911139-48211551 | 300413  |  |                                                 | 0.339929386 | 0.566165739 | 0.02 | 0.05 |
| 17q#197857_197863 | 17 | 48439335-48624909 | 185575  |  |                                                 | 0.339929386 | 0.566165739 | 0.02 | 0.05 |
| 17q#197868_197872 | 17 | 48751308-48854597 | 103290  |  |                                                 | 0.339929386 | 0.566165739 | 0.02 | 0.05 |
| 17q#199583_199592 | 17 | 69673554-69752348 | 78795   |  | RPL38, TTYH2                                    | 0.339929386 | 0.566165739 | 0.02 | 0.05 |
| 17q#197391_197396 | 17 | 43645057-43705778 | 60722   |  | SCAP1                                           | 0.339929386 | 0.566165739 | 0.02 | 0.05 |
| 17q#199319_199325 | 17 | 65159361-65311214 | 151854  |  |                                                 | 0.339929386 | 0.566165739 | 0.02 | 0.05 |
| 17q#199593_199622 | 17 | 69760815-69972408 | 211594  |  | TTYH2, DNAI2, KIF19, GPR142, GPRC5C             | 0.339929386 | 0.566165739 | 0.02 | 0.05 |
| 20q#216716_216744 | 20 | 49144509-49604271 | 459763  |  | NFATC2                                          | 0.339929386 | 0.566165739 | 0.02 | 0.05 |
| 20q#217495_217497 | 20 | 59610958-59632782 | 21825   |  | CDH4                                            | 0.339929386 | 0.566165739 | 0.02 | 0.05 |
| 20q#217450_217457 | 20 | 59135657-59257639 | 121983  |  |                                                 | 0.339929386 | 0.566165739 | 0.02 | 0.05 |
| 17q#197851_197856 | 17 | 48253722-48388402 | 134681  |  |                                                 | 0.339929386 | 0.566165739 | 0.02 | 0.05 |
| 17q#197864_197867 | 17 | 48661365-48734781 | 73417   |  |                                                 | 0.339929386 | 0.566165739 | 0.02 | 0.05 |
| 17q#197630_197632 | 17 | 45700312-45714631 | 14320   |  | TMEM92                                          | 0.339929386 | 0.566165739 | 0.02 | 0.05 |
| 17q#200105_200108 | 17 | 74060402-74081708 | 21307   |  | DNAHL1, BC034158                                | 0.339929386 | 0.566165739 | 0.02 | 0.05 |
| 17q#198268_198276 | 17 | 54122826-54198211 | 75386   |  | TEX14, RAD51C, PPM1E                            | 0.339929386 | 0.566165739 | 0.02 | 0.05 |
| 12q#156673_156772 | 12 | 67202216-68223152 | 1020937 |  | NUP107, SLC35E3, MDM2, CPM, CPSF6, LYZ, YEATS   | 0.339929386 | 0.566165739 | 0.02 | 0.05 |
| 12q#156792_156807 | 12 | 68369636-68464834 | 95199   |  | VMD2L3, BC042465, RAB3IP                        | 0.339929386 | 0.566165739 | 0.02 | 0.05 |
| 17q#197988_197997 | 17 | 51154337-51229521 | 75185   |  | TMEM100, AK095175, PCTP                         | 0.339929386 | 0.566165739 | 0.02 | 0.05 |
| 17q#198094_198096 | 17 | 52607113-52664847 | 57735   |  |                                                 | 0.339929386 | 0.566165739 | 0.02 | 0.05 |
| 17q#198023_198028 | 17 | 51733282-51783199 | 49918   |  | ANKFN1                                          | 0.339929386 | 0.566165739 | 0.02 | 0.05 |
| 8p#110349_110354  | 8  | 34785140-34897046 | 111907  |  |                                                 | 0.339929386 | 0.566165739 | 0.02 | 0.05 |
| 17q#200245_200252 | 17 | 75569393-75633807 | 64415   |  | TBC1D16, BC035251                               | 0.339929386 | 0.566165739 | 0.02 | 0.05 |
| 17q#200253_200258 | 17 | 75639557-75679277 | 39721   |  | BC035251, AB046860                              | 0.339929386 | 0.566165739 | 0.02 | 0.05 |
| 17q#199858_199869 | 17 | 71548135-71614473 | 66339   |  | SRP68, GALR2, LGICZ1, EXOC7                     | 0.339929386 | 0.566165739 | 0.02 | 0.05 |
| 17q#200063_200085 | 17 | 73700328-73885354 | 185027  |  | FMID, BIRC5, BC042066, AK128457, BC034158, SOCS | 0.339929386 | 0.566165739 | 0.02 | 0.05 |
| 17q#200113_200114 | 17 | 74153120-74162611 | 9492    |  | BC034158                                        | 0.339929386 | 0.566165739 | 0.02 | 0.05 |
| 17q#197633_197647 | 17 | 45718954-45823610 | 104657  |  | XYL2, MRPL27, EME1, LRRC59                      | 0.339929386 | 0.566165739 | 0.02 | 0.05 |
| 17q#200109_200112 | 17 | 74092224-74127473 | 35250   |  | BC034158                                        | 0.339929386 | 0.566165739 | 0.02 | 0.05 |
| 12q#156773_156791 | 12 | 68231737-68363943 | 132207  |  | FRS2, CCT2, LRRC10, VMD2L3                      | 0.339929386 | 0.566165739 | 0.02 | 0.05 |
| 12q#156808_156813 | 12 | 68474620-68518951 | 44332   |  | RAB3IP                                          | 0.339929386 | 0.566165739 | 0.02 | 0.05 |
| 20q#217499_217502 | 20 | 59644650-59668858 | 24209   |  | CDH4                                            | 0.339929386 | 0.566165739 | 0.02 | 0.05 |
| 20q#217458_217492 | 20 | 59263320-59585411 | 322092  |  | CDH4                                            | 0.339929386 | 0.566165739 | 0.02 | 0.05 |
| 17q#200053_200062 | 17 | 73649740-73695337 | 45598   |  | AK090478, AY358510, SYNGR2, TK1, AFMID          | 0.339929386 | 0.566165739 | 0.02 | 0.05 |
| 17q#200023_200046 | 17 | 73327839-73618375 | 290537  |  | FLJ45079, BC039479, TNRC6C, BC045631, BC041417  | 0.339929386 | 0.566165739 | 0.02 | 0.05 |
| 8p#110328_110333  | 8  | 34327163-34469009 | 141847  |  |                                                 | 0.339929386 | 0.566165739 | 0.02 | 0.05 |
| 8p#110347_110348  | 8  | 34735105-34749458 | 14354   |  |                                                 | 0.339929386 | 0.566165739 | 0.02 | 0.05 |
| 17q#198006_198022 | 17 | 51529877-51717521 | 187645  |  | ANKFN1                                          | 0.339929386 | 0.566165739 | 0.02 | 0.05 |
| 20q#217503_217507 | 20 | 59678268-59711329 | 33062   |  | CDH4                                            | 0.339929386 | 0.566165739 | 0.02 | 0.05 |
| 20q#217511_217528 | 20 | 59747489-59903431 | 155943  |  | CDH4                                            | 0.339929386 | 0.566165739 | 0.02 | 0.05 |
| 17q#195109_195117 | 17 | 23072917-23176298 | 103382  |  | NOS2A                                           | 0.339929386 | 0.566165739 | 0.02 | 0.05 |
| 17q#195065_195080 | 17 | 22614479-22764751 | 150273  |  | U43586, WSB1                                    | 0.339929386 | 0.566165739 | 0.02 | 0.05 |
| 17q#195053_195064 | 17 | 22315936-22593145 | 277210  |  | U43586                                          | 0.339929386 | 0.566165739 | 0.02 | 0.05 |
| 8p#110427_110431  | 8  | 36013545-36098356 | 84812   |  |                                                 | 0.339929386 | 0.566165739 | 0.02 | 0.05 |
| 8p#110373_110385  | 8  | 35309074-35492937 | 183864  |  | AY358147                                        | 0.339929386 | 0.566165739 | 0.02 | 0.05 |
| 17q#195096_195100 | 17 | 22915588-22952572 | 36985   |  | KSR1                                            | 0.339929386 | 0.566165739 | 0.02 | 0.05 |



|                   |    |                     |         |                                                     |             |             |      |      |
|-------------------|----|---------------------|---------|-----------------------------------------------------|-------------|-------------|------|------|
| 8p#110370_110372  | 8  | 35256729-35294944   | 38216   | AY358147                                            | 0.339929386 | 0.566165739 | 0.02 | 0.05 |
| 1q#16552_16556    | 1  | 211395327-211549059 | 153733  |                                                     | 0.339929386 | 0.566165739 | 0.02 | 0.05 |
| 1q#16591_16593    | 1  | 212152890-212173671 | 20782   | KCTD3                                               | 0.339929386 | 0.566165739 | 0.02 | 0.05 |
| 1q#16573_16578    | 1  | 211722825-211779349 | 56525   | KCNK2                                               | 0.339929386 | 0.566165739 | 0.02 | 0.05 |
| 17q#195101_195108 | 17 | 22963211-23030319   | 67109   | KSR1, LGALS9                                        | 0.339929386 | 0.566165739 | 0.02 | 0.05 |
| 1q#16557_16572    | 1  | 211564531-211709689 | 145159  | KCNK2                                               | 0.339929386 | 0.566165739 | 0.02 | 0.05 |
| 11q#146265_146269 | 11 | 80790766-80921369   | 130604  |                                                     | 0.339929386 | 0.566165739 | 0.02 | 0.05 |
| 1q#16536_16550    | 1  | 211175187-211309303 | 134117  | CENPF                                               | 0.339929386 | 0.566165739 | 0.02 | 0.05 |
| 6q#90182_90188    | 6  | 122293593-122580769 | 287177  |                                                     | 0.339929386 | 0.566165739 | 0.02 | 0.05 |
| 1q#15112_15119    | 1  | 196375888-196683902 | 308015  |                                                     | 0.339929386 | 0.566165739 | 0.02 | 0.05 |
| 1q#15120_15149    | 1  | 196703921-197074404 | 370484  | NR5A2, BC040731                                     | 0.339929386 | 0.566165739 | 0.02 | 0.05 |
| 1q#16503_16535    | 1  | 210868316-211165392 | 297077  | SMYD2, PTPN14, CENPF                                | 0.339929386 | 0.566165739 | 0.02 | 0.05 |
| 1q#15150_15165    | 1  | 197084971-197276417 | 191447  | ZNF281, KIF14                                       | 0.339929386 | 0.566165739 | 0.02 | 0.05 |
| 1q#15166_15168    | 1  | 197287009-197299220 | 12212   | KIF14                                               | 0.339929386 | 0.566165739 | 0.02 | 0.05 |
| 1q#16493_16502    | 1  | 210661522-210961953 | 200432  | SMYD2                                               | 0.339929386 | 0.566165739 | 0.02 | 0.05 |
| 11q#146419_146427 | 11 | 82998255-83073325   | 75071   | DLG2                                                | 0.339929386 | 0.566165739 | 0.02 | 0.05 |
| 11q#146491_146495 | 11 | 83708098-83748590   | 40493   | DLG2                                                | 0.339929386 | 0.566165739 | 0.02 | 0.05 |
| 11q#146428_146442 | 11 | 83087833-83234222   | 146390  | DLG2                                                | 0.339929386 | 0.566165739 | 0.02 | 0.05 |
| 11q#146244_146245 | 11 | 80093144-80120907   | 27764   |                                                     | 0.339929386 | 0.566165739 | 0.02 | 0.05 |
| 11q#146241_146243 | 11 | 79974644-80046693   | 72050   |                                                     | 0.339929386 | 0.566165739 | 0.02 | 0.05 |
| 11q#146255_146260 | 11 | 80462013-80609482   | 147470  |                                                     | 0.339929386 | 0.566165739 | 0.02 | 0.05 |
| 11q#146353_146364 | 11 | 82336526-82436405   | 99880   | AK058145, BC032890, BX641138, RAB30                 | 0.339929386 | 0.566165739 | 0.02 | 0.05 |
| 17q#198716_198748 | 17 | 58829892-59047700   | 217809  | AB046856, CYB561, ACE, KCNH6, WDR68, CCDC44         | 2.128082458 | 0.642198548 | 0.05 | 0.02 |
| 17q#197738_197752 | 17 | 46548759-46657244   | 108486  | SPAG9, NME1-NME2, MBTD1, BC034364                   | 2.128082458 | 0.642198548 | 0.05 | 0.02 |
| 17q#197462_197470 | 17 | 44212401-44288518   | 76118   | TTL6, BC041368, CALCOCO2                            | 2.128082458 | 0.642198548 | 0.05 | 0.02 |
| 17q#198787_198793 | 17 | 59313420-59355804   | 42385   | CR620501                                            | 2.128082458 | 0.642198548 | 0.05 | 0.02 |
| 17q#197442_197461 | 17 | 44049732-44195258   | 145527  | AK025239, HOXB9, BC038560, PRAC, HOXB13, TTL6       | 2.128082458 | 0.642198548 | 0.05 | 0.02 |
| 17q#197471_197480 | 17 | 44296927-44360080   | 63154   | CALCOCO2, ATP5G1, UBE2Z                             | 2.128082458 | 0.642198548 | 0.05 | 0.02 |
| 17q#198794_198796 | 17 | 59360896-59370251   | 9356    | CD79B, SCN4A                                        | 2.128082458 | 0.642198548 | 0.05 | 0.02 |
| 17q#197772_197773 | 17 | 46924340-46940757   | 16418   |                                                     | 2.128082458 | 0.642198548 | 0.05 | 0.02 |
| 17q#195341_195346 | 17 | 24920439-24939229   | 18791   | TP53113, GIT1                                       | 2.128082458 | 0.642198548 | 0.05 | 0.02 |
| 17q#196276_196281 | 17 | 34416502-34473439   | 56938   | AK125814, PLXDC1                                    | 2.128082458 | 0.642198548 | 0.05 | 0.02 |
| 16p#187173_187211 | 16 | 10556862-10914067   | 357206  | EMP2, FLJ32871, NUBP1, BC050569, CIITA              | 2.128082458 | 0.642198548 | 0.05 | 0.02 |
| 16p#187272_187287 | 16 | 11411999-11568293   | 156295  | LOC400499, LITAF                                    | 2.128082458 | 0.642198548 | 0.05 | 0.02 |
| 16p#187139_187172 | 16 | 10093440-10550554   | 457115  | RIN2A, BC040539, AK093414, ATF7IP2, AK096403, EM    | 2.128082458 | 0.642198548 | 0.05 | 0.02 |
| 16p#187054_187080 | 16 | 8888451-9235531     | 347081  | USP7, PRO0149                                       | 2.128082458 | 0.642198548 | 0.05 | 0.02 |
| 16p#187082_187138 | 16 | 9297678-10083715    | 786038  | CR749525, CR749843, GRIN2A                          | 2.128082458 | 0.642198548 | 0.05 | 0.02 |
| 17q#196233_196242 | 17 | 34125663-34173220   | 47558   | MLLT6, AL832481, PCGF2, PSMB3                       | 2.128082458 | 0.642198548 | 0.05 | 0.02 |
| 17q#196243_196249 | 17 | 34178521-34211493   | 32973   | PIP5K2B, CCDC49                                     | 2.128082458 | 0.642198548 | 0.05 | 0.02 |
| 17q#196258_196268 | 17 | 34256775-34338307   | 81533   | RPL23, LASP1                                        | 2.128082458 | 0.642198548 | 0.05 | 0.02 |
| 17q#196212_196216 | 17 | 33917570-33958680   | 41111   | AB040934, SNIP                                      | 2.128082458 | 0.642198548 | 0.05 | 0.02 |
| 16p#187324_187329 | 16 | 11915652-11969248   | 53597   | GSPT1, TNFRSF17                                     | 2.128082458 | 0.642198548 | 0.05 | 0.02 |
| 1q#14203_14215    | 1  | 181315906-181437875 | 121970  | C1orf21, EDEM3                                      | 2.128082458 | 0.642198548 | 0.05 | 0.02 |
| 16p#187317_187323 | 16 | 11855872-11909270   | 53399   | AK096386, GSPT1                                     | 2.128082458 | 0.642198548 | 0.05 | 0.02 |
| 16p#186250_186254 | 16 | 1502609-1534016     | 31408   | IFT140                                              | 2.128082458 | 0.642198548 | 0.05 | 0.02 |
| 1q#14216_14336    | 1  | 181448821-182845233 | 1396413 | C1orf25, C1orf26, AK000128, IVNS1ABP, AF508904, AF5 | 2.128082458 | 0.642198548 | 0.05 | 0.02 |
| 16p#186258_186308 | 16 | 1553479-1909150     | 355672  | PK8IP3, NME3, MRPS34, SPSB3, NUBP2, IGFALS, HA      | 2.128082458 | 0.642198548 | 0.05 | 0.02 |
| 16p#186309_186314 | 16 | 1912775-1935070     | 22296   | SEPX1, RPL3L                                        | 2.128082458 | 0.642198548 | 0.05 | 0.02 |
| 16p#186255_186256 | 16 | 1538535-1543070     | 4536    | IFT140                                              | 2.128082458 | 0.642198548 | 0.05 | 0.02 |
| 16p#186248_186249 | 16 | 1489837-1498083     | 8247    | KIAA0683                                            | 2.128082458 | 0.642198548 | 0.05 | 0.02 |
| 16p#186246_186247 | 16 | 1478848-1482684     | 3837    |                                                     | 2.128082458 | 0.642198548 | 0.05 | 0.02 |
| 11q#144844_144846 | 11 | 65940201-65950270   | 10070   | NPAS4                                               | 2.128082458 | 0.642198548 | 0.05 | 0.02 |
| 11q#144837_144842 | 11 | 65883692-65919782   | 36091   | SLC29A2                                             | 2.128082458 | 0.642198548 | 0.05 | 0.02 |
| 16p#187212_187271 | 16 | 10919208-11392868   | 473661  | DEXI, KIAA0350, BC039361, TNP2, PRM2, PRM1, MGC     | 2.882354056 | 0.645925646 | 0.07 | 0.02 |
| 1q#14189_14202    | 1  | 181198479-181305325 | 106847  | C1orf21                                             | 2.882354056 | 0.645925646 | 0.07 | 0.02 |

|                   |    |                     |         |                                                    |             |             |      |      |
|-------------------|----|---------------------|---------|----------------------------------------------------|-------------|-------------|------|------|
| 1q#14174_14188    | 1  | 180940607-181184651 | 244045  | C1orf21                                            | 2.82354056  | 0.645925646 | 0.07 | 0.02 |
| 17q#197721_197725 | 17 | 46381045-46432038   | 50994   | SPAG9                                              | 0.681284474 | 0.686923729 | 0.05 | 0.07 |
| 17q#199758_199759 | 17 | 70805215-70814973   | 9759    |                                                    | 0.681284474 | 0.686923729 | 0.05 | 0.07 |
| 17q#199760_199761 | 17 | 70825745-70828064   | 2320    | GRB2                                               | 0.681284474 | 0.686923729 | 0.05 | 0.07 |
| 17q#196371_196374 | 17 | 35161875-35185396   | 23522   | AK128436, BC012267, ZNFN1A3                        | 0.681284474 | 0.686923729 | 0.05 | 0.07 |
| 17q#196375_196386 | 17 | 35192331-35286624   | 94294   | ZNFN1A3, ZPBP2                                     | 0.681284474 | 0.686923729 | 0.05 | 0.07 |
| 17q#195143_195208 | 17 | 23548674-23937287   | 388614  | NP2, C17orf32, VTN, SARM1, HCP1, BC045622, SLC13A1 | 0.681284474 | 0.686923729 | 0.05 | 0.07 |
| 11q#144977_144978 | 11 | 66893068-66898996   | 5929    | CLCF1, AK096155                                    | 0.681284474 | 0.686923729 | 0.05 | 0.07 |
| 11q#144967_144975 | 11 | 66823619-66881793   | 58175   | ANKRD13D, SSH3, AK096155, POLD4                    | 0.681284474 | 0.686923729 | 0.05 | 0.07 |
| 17q#196364_196370 | 17 | 35138310-35157665   | 19356   | ERBB2, C17orf37, GRB7                              | 0.681284474 | 0.686923729 | 0.05 | 0.07 |
| 17q#195401_195418 | 17 | 25441704-25549266   | 107563  | EFCAB5, CCDC55, SLC6A4                             | 0.681284474 | 0.686923729 | 0.05 | 0.07 |
| 11q#144979_144984 | 11 | 66902057-66922464   | 20408   | AK096155, RAD9A                                    | 0.681284474 | 0.686923729 | 0.05 | 0.07 |
| 17q#195243_195261 | 17 | 24108428-24249443   | 141016  | C17orf63, ERAL1, FLOT2, MGC23280                   | 0.681284474 | 0.686923729 | 0.05 | 0.07 |
| 17q#195209_195242 | 17 | 23944100-24104544   | 160445  | PO6, KIAA0100, SDF2, SUPT6H, PROCA1, RAB34, RPL10A | 0.681284474 | 0.686923729 | 0.05 | 0.07 |
| 17q#195262_195265 | 17 | 24253086-24281034   | 27949   | MGC23280, PHF12                                    | 0.681284474 | 0.686923729 | 0.05 | 0.07 |
| 17q#196292_196302 | 17 | 34586425-34636173   | 49749   | CACNB1, RPL19, STAC2                               | 0.681284474 | 0.686923729 | 0.05 | 0.07 |
| 17q#195266_195282 | 17 | 24291361-24407417   | 116057  | PHF12, SEZ6, PIPOX                                 | 0.681284474 | 0.686923729 | 0.05 | 0.07 |
| 17q#196303_196323 | 17 | 34642531-34803341   | 160811  | AL117623, FBXL20                                   | 0.681284474 | 0.686923729 | 0.05 | 0.07 |
| 17q#196324_196335 | 17 | 34809479-34925566   | 116088  | FBXL20, BC060758, PPARBP, CRKRS                    | 0.681284474 | 0.686923729 | 0.05 | 0.07 |
| 17q#196355_196363 | 17 | 35082460-35127971   | 45512   | PERLD1, ERBB2                                      | 0.681284474 | 0.686923729 | 0.05 | 0.07 |
| 17q#196336_196354 | 17 | 34940330-35078636   | 138307  | CRKRS, NEUROD2, PPP1R1B, STARD3, TCAP, PNMT        | 0.681284474 | 0.686923729 | 0.05 | 0.07 |
| 11q#144948_144956 | 11 | 66636636-66721052   | 84417   | FBXL11                                             | 0.681284474 | 0.686923729 | 0.05 | 0.07 |
| 17q#195283_195303 | 17 | 24413434-24591396   | 177963  | MYO18A                                             | 0.681284474 | 0.686923729 | 0.05 | 0.07 |
| 17q#195396_195400 | 17 | 25384943-25432153   | 47211   | EFCAB5                                             | 0.681284474 | 0.686923729 | 0.05 | 0.07 |
| 17q#196284_196290 | 17 | 34506479-34563111   | 56633   | PLXDC1                                             | 0.681284474 | 0.686923729 | 0.05 | 0.07 |
| 17q#195354_195355 | 17 | 24978758-24987707   | 8950    | SSH2                                               | 0.681284474 | 0.686923729 | 0.05 | 0.07 |
| 1q#16386_16419    | 1  | 209299315-209574757 | 275443  | 2248, LOC149643, AK092887, FLVCR, AK001419, FLJ1   | 0.681284474 | 0.686923729 | 0.05 | 0.07 |
| 1q#16441_16451    | 1  | 209766869-209857159 | 90291   | RPS6KC1                                            | 0.681284474 | 0.686923729 | 0.05 | 0.07 |
| 1q#16365_16377    | 1  | 209149399-209231018 | 81620   | ATF3, FAM71A                                       | 0.681284474 | 0.686923729 | 0.05 | 0.07 |
| 1q#15937_15943    | 1  | 204041716-204085341 | 43626   | CR2, CR1                                           | 0.681284474 | 0.686923729 | 0.05 | 0.07 |
| 1q#15988_16030    | 1  | 204584768-205277436 | 692669  | AK125154, PLXNA2, AK074960                         | 0.681284474 | 0.686923729 | 0.05 | 0.07 |
| 1q#15452_15497    | 1  | 199758885-200079371 | 320487  | MYOG, ADORA1, MYBPH, CHI3L1, X75546, CHIT1, BTG    | 0.681284474 | 0.686923729 | 0.05 | 0.07 |
| 11q#146140_146146 | 11 | 77908223-77975657   | 67435   | NARS2                                              | 0.675478467 | 0.713210389 | 0.07 | 0.10 |
| 1q#15508_15516    | 1  | 200206810-200349902 | 143093  | OPTC, ATP2B4                                       | 0.675478467 | 0.713210389 | 0.07 | 0.10 |
| 1q#15549_15551    | 1  | 200599204-200624132 | 24929   |                                                    | 0.675478467 | 0.713210389 | 0.07 | 0.10 |
| 1q#15517_15548    | 1  | 200356948-200589921 | 232974  | ATP2B4, LAX1, ZC3H11A, SNRPE                       | 0.675478467 | 0.713210389 | 0.07 | 0.10 |
| 11q#146107_146109 | 11 | 77604277-77621589   | 17313   | GAB2                                               | 0.669456818 | 0.73640157  | 0.08 | 0.12 |
| 11q#146110_146111 | 11 | 77636520-77643121   | 6602    | GAB2                                               | 0.669456818 | 0.73640157  | 0.08 | 0.12 |
| 11q#146113_146125 | 11 | 77664284-77764267   | 99984   | GAB2                                               | 0.669456818 | 0.73640157  | 0.08 | 0.12 |
| 11q#146126_146136 | 11 | 77771343-77867386   | 96044   | GAB2, BC039514, NARS2                              | 0.669456818 | 0.73640157  | 0.08 | 0.12 |
| 11q#145390_145391 | 11 | 71081930-71105229   | 23300   |                                                    | Inf         | 1           | 0.02 | 0.00 |
| 11q#145436_145438 | 11 | 71588137-71604615   | 16479   |                                                    | 0.692294348 | 1           | 0.02 | 0.02 |
| 11q#145446_145458 | 11 | 71637295-71757982   | 120688  | CLPB                                               | 0.692294348 | 1           | 0.02 | 0.02 |
| 17q#199393_199397 | 17 | 66693317-66834499   | 141183  | BC039327                                           | 0.692294348 | 1           | 0.02 | 0.02 |
| 17q#198700_198715 | 17 | 58655004-58810925   | 155922  | AB046856                                           | 1.044194198 | 1           | 0.05 | 0.05 |
| 17q#198749_198750 | 17 | 59051653-59063808   | 12156   | MAP3K3                                             | 1.044194198 | 1           | 0.05 | 0.05 |
| 17q#198602_198613 | 17 | 57388446-57488204   | 99759   | THRAP1                                             | 1.044194198 | 1           | 0.05 | 0.05 |
| 17q#199414_199415 | 17 | 67307629-67334965   | 27337   |                                                    | 0.692294348 | 1           | 0.02 | 0.02 |
| 17q#197726_197737 | 17 | 46441133-46535555   | 94423   | SPAG9                                              | 1.044194198 | 1           | 0.05 | 0.05 |
| 11q#145403_145412 | 11 | 71367881-71406281   | 38401   | RNF121, AK098255, NUMA1                            | Inf         | 1           | 0.02 | 0.00 |
| 11q#145440_145445 | 11 | 71610584-71632187   | 21604   | FOLR2, INPPL1, PHOX2A                              | 0.692294348 | 1           | 0.02 | 0.02 |
| 7q#103749_103782  | 7  | 119653165-119957425 | 304261  | KCND2                                              | 0           | 1           | 0.00 | 0.00 |
| 7q#103783_103788  | 7  | 119962942-119994861 | 31920   | KCND2                                              | Inf         | 1           | 0.02 | 0.00 |
| 7q#103789_103887  | 7  | 120003948-121239798 | 1235851 | TSPAN12, ING3, FLJ21986, WNT16, FAM3C, PTPRZ1      | 0           | 1           | 0.00 | 0.00 |
| 7q#104095_104104  | 7  | 123374990-123546467 | 171478  |                                                    | 0           | 1           | 0.00 | 0.00 |

|                   |    |                     |        |                                                 |             |   |      |      |
|-------------------|----|---------------------|--------|-------------------------------------------------|-------------|---|------|------|
| 11q#145415_145421 | 11 | 71441504-71482413   | 40910  | NUMA1, LRRCS51                                  | 0.692294348 | 1 | 0.02 | 0.02 |
| 11q#145422_145435 | 11 | 71487511-71579124   | 91614  | C11orf59, AF289588, C11orf51, FOLR3, FOLR1      | 0.692294348 | 1 | 0.02 | 0.02 |
| 17q#197567_197572 | 17 | 45169319-45222386   | 53068  | FAM117A, MYST2                                  | 0.686886232 | 1 | 0.03 | 0.05 |
| 17q#199417_199421 | 17 | 67438277-67540654   | 102378 |                                                 | 0.692294348 | 1 | 0.02 | 0.02 |
| 17q#198751_198759 | 17 | 59071406-59127328   | 55923  | MAP3K3                                          | 1.044194198 | 1 | 0.05 | 0.05 |
| 17q#198600_198601 | 17 | 57372913-57378582   | 5670   | THRAP1                                          | 0.686886232 | 1 | 0.03 | 0.05 |
| 17q#198614_198619 | 17 | 57500156-57606350   | 106195 |                                                 | 1.044194198 | 1 | 0.05 | 0.05 |
| 17q#199422_199443 | 17 | 67549709-67826018   | 276310 | AK056229, SOX9                                  | 0.692294348 | 1 | 0.02 | 0.02 |
| 20q#217358_217380 | 20 | 57956028-58109703   | 153676 | AL137442, CDH26, AF169690, FLJ33860, CR590645   | Inf         | 1 | 0.02 | 0.00 |
| 20q#217381_217382 | 20 | 58120309-58147879   | 27571  | AK092805                                        | Inf         | 1 | 0.02 | 0.00 |
| 17q#197753_197766 | 17 | 46668543-46795546   | 127004 | BC034364, UTP18, BC039326, FLJ42842             | 1.398928118 | 1 | 0.03 | 0.02 |
| 17q#196943_196948 | 17 | 39373438-39407681   | 34244  | AK024231, PYY                                   | 0           | 1 | 0.00 | 0.00 |
| 17q#196949_196967 | 17 | 39414914-39546421   | 131508 | PYY, NAGS, TMEM101, LSM12, G6PC3, HDAC5         | Inf         | 1 | 0.02 | 0.00 |
| 17q#196968_197018 | 17 | 39559167-39896210   | 337044 | 042297, UBTF, BC050302, X77737, SLC4A1, BC05170 | 0           | 1 | 0.00 | 0.00 |
| 17q#197508_197516 | 17 | 44646323-44683657   | 37335  | ABI3, PHOSPHO1, FLJ40194                        | 0.686886232 | 1 | 0.03 | 0.05 |
| 17q#197536_197544 | 17 | 44860354-44953988   | 93635  | AK125088, NGFR                                  | 1.398928118 | 1 | 0.03 | 0.02 |
| 17q#199470_199473 | 17 | 68191745-68225783   | 34039  | SLC39A11                                        | 0.692294348 | 1 | 0.02 | 0.02 |
| 17q#197499_197507 | 17 | 44564575-44641713   | 77139  | B4GALNT2, GNGT2                                 | 0.686886232 | 1 | 0.03 | 0.05 |
| 17q#197562_197564 | 17 | 45116870-45133783   | 16914  | SLC35B1                                         | 0.686886232 | 1 | 0.03 | 0.05 |
| 17q#199457_199469 | 17 | 68033456-68185273   | 151818 | AK000477, AK129994, SLC39A11                    | 0.692294348 | 1 | 0.02 | 0.02 |
| 17q#197481_197498 | 17 | 44370440-44539515   | 169076 | SNF8, GIP, IGF2BP1                              | 1.398928118 | 1 | 0.03 | 0.02 |
| 20q#217405_217413 | 20 | 58421666-58565879   | 144214 |                                                 | 1.398928118 | 1 | 0.03 | 0.02 |
| 20q#217414_217416 | 20 | 58580084-58613507   | 33424  |                                                 | 1.398928118 | 1 | 0.03 | 0.02 |
| 17q#197908_197911 | 17 | 49865715-49962582   | 96868  |                                                 | 0.686886232 | 1 | 0.03 | 0.05 |
| 17q#197914_197917 | 17 | 50084795-50172632   | 87838  |                                                 | 0.692294348 | 1 | 0.02 | 0.02 |
| 17q#197056_197057 | 17 | 40230655-40238050   | 7396   | GJA7                                            | 0           | 1 | 0.00 | 0.00 |
| 17q#198637_198646 | 17 | 57903319-58020080   | 116762 | BC060511, TLK2                                  | 1.413401461 | 1 | 0.07 | 0.05 |
| 17q#198680_198699 | 17 | 58419953-58642739   | 222787 | CR936685, AB046856                              | 1.044194198 | 1 | 0.05 | 0.05 |
| 17q#198628_198631 | 17 | 57810838-57838165   | 27328  | EFCAB3                                          | 0.686886232 | 1 | 0.03 | 0.05 |
| 17q#198632_198636 | 17 | 57851812-57887232   | 35421  | METTL2A                                         | 1.044194198 | 1 | 0.05 | 0.05 |
| 17q#198760_198769 | 17 | 59128253-59185612   | 57360  | LIMD2, LYK5, CCDC47                             | 1.044194198 | 1 | 0.05 | 0.05 |
| 17q#198771_198775 | 17 | 59201445-59236209   | 34765  | CCDC47, DDX42                                   | 1.044194198 | 1 | 0.05 | 0.05 |
| 17q#198884_198887 | 17 | 60210092-60214775   | 4684   | BC016458                                        | 1.398928118 | 1 | 0.03 | 0.02 |
| 7q#103000_103002  | 7  | 108862206-108951718 | 89513  |                                                 | 0           | 1 | 0.00 | 0.00 |
| 7q#105279_105342  | 7  | 136411438-136947068 | 535631 | PTN, DGKI                                       | 0           | 1 | 0.00 | 0.00 |
| 7q#102989_102999  | 7  | 108621416-108834209 | 212794 |                                                 | 0           | 1 | 0.00 | 0.00 |
| 7q#104174_104187  | 7  | 124385210-124551368 | 166159 | LOC401398, BC042072                             | 0           | 1 | 0.00 | 0.00 |
| 7q#104313_104318  | 7  | 126537296-126607605 | 70310  | CR611240, LOC168850                             | 0           | 1 | 0.00 | 0.00 |
| 7q#105221_105254  | 7  | 135553662-136096388 | 542727 | AF279773, CHR2                                  | 0           | 1 | 0.00 | 0.00 |
| 7q#101877_101906  | 7  | 98190483-98425089   | 234607 | TRRAP, AK001533, SMURF1                         | 0           | 1 | 0.00 | 0.00 |
| 7q#101948_101964  | 7  | 98698902-98787737   | 88836  | PSF4, ATP5J2, LOC285989, ZNF394, ZFP95, AK02452 | 0           | 1 | 0.00 | 0.00 |
| 7q#103347_103360  | 7  | 113602746-113719300 | 116555 | AK131266, FOXP2                                 | 0           | 1 | 0.00 | 0.00 |
| 7q#103667_103689  | 7  | 117614046-118321971 | 707926 |                                                 | 0           | 1 | 0.00 | 0.00 |
| 7q#103724_103748  | 7  | 119375024-119638402 | 263379 | KCND2                                           | 0           | 1 | 0.00 | 0.00 |
| 7q#103888_103934  | 7  | 121246245-121666846 | 420602 | PRZ1, AASS, AF229180, LOC389549, AK057037, CADF | 0           | 1 | 0.00 | 0.00 |
| 7q#103935_103975  | 7  | 121675659-121981449 | 305791 | CADPS2                                          | 0           | 1 | 0.00 | 0.00 |
| 7q#104135_104173  | 7  | 124051574-124378269 | 326696 | POT1, AK022580, LOC401398                       | 0           | 1 | 0.00 | 0.00 |
| 7q#104266_104312  | 7  | 126051619-126515428 | 463810 | GRM8                                            | 0           | 1 | 0.00 | 0.00 |
| 7q#104320_104359  | 7  | 126617932-127020413 | 402482 | LOC168850, GCC1, ARF5, FSCN3, PAX4, SND1        | 0           | 1 | 0.00 | 0.00 |
| 7q#104360_104402  | 7  | 127026067-127394045 | 367979 | SND1                                            | 0           | 1 | 0.00 | 0.00 |
| 11q#145396_145398 | 11 | 71305189-71318738   | 13550  | AK131288, RNF121                                | Inf         | 1 | 0.02 | 0.00 |
| 11q#145399_145401 | 11 | 71325621-71345964   | 20344  | RNF121                                          | Inf         | 1 | 0.02 | 0.00 |
| 17q#198784_198785 | 17 | 59286906-59297561   | 10656  |                                                 | 1.044194198 | 1 | 0.05 | 0.05 |
| 11q#145460_145461 | 11 | 71783379-71789246   | 5868   | CLPB                                            | 0.692294348 | 1 | 0.02 | 0.02 |
| 17q#197874_197877 | 17 | 48911348-49008258   | 96911  |                                                 | 0.692294348 | 1 | 0.02 | 0.02 |



|                   |    |                   |         |                                                   |             |   |      |      |
|-------------------|----|-------------------|---------|---------------------------------------------------|-------------|---|------|------|
| 20q#217324_217349 | 20 | 57651922-57882524 | 230603  | PHACTR3, SYCP2                                    | Inf         | 1 | 0.02 | 0.00 |
| 17q#197788_197801 | 17 | 47175045-47306472 | 131428  | CA10                                              | 1.044194198 | 1 | 0.05 | 0.05 |
| 17q#197802_197811 | 17 | 47318646-47390568 | 71923   | CA10                                              | 0.686886232 | 1 | 0.03 | 0.05 |
| 17q#197785_197787 | 17 | 47145716-47165387 | 19672   | CA10                                              | 1.413401461 | 1 | 0.07 | 0.05 |
| 20q#217196_217223 | 20 | 56361962-56643176 | 281215  | RAB22A, VAPB, FLJ90166, AK054637                  | 0.692294348 | 1 | 0.02 | 0.02 |
| 20q#217276_217292 | 20 | 57050416-57245403 | 194988  | C20orf45, AL833682                                | 0.692294348 | 1 | 0.02 | 0.02 |
| 20q#217310_217323 | 20 | 57493095-57645305 | 152211  | AK098788, PHACTR3                                 | Inf         | 1 | 0.02 | 0.00 |
| 17q#197896_197899 | 17 | 49516136-49544109 | 27974   |                                                   | 0.686886232 | 1 | 0.03 | 0.05 |
| 20q#216437_216511 | 20 | 45849167-47092540 | 1243374 | AK129540, BC035164, PREX1, ARFGF2                 | 0           | 1 | 0.00 | 0.00 |
| 20q#216520_216538 | 20 | 47174278-47338039 | 163762  | STAU1, DDX27, ZNF1, AY513722                      | 0           | 1 | 0.00 | 0.00 |
| 20q#216586_216605 | 20 | 47837549-47978892 | 141344  | SLC9A8, SPATA2                                    | 0           | 1 | 0.00 | 0.00 |
| 20q#216676_216715 | 20 | 48782981-49120710 | 337730  | PARD6B, BCAS4, ADNP, DPM1, MOCS3, KCNG1           | 0.692294348 | 1 | 0.02 | 0.02 |
| 17q#197882_197891 | 17 | 49218134-49331814 | 113681  | KIF2B                                             | 1.398928118 | 1 | 0.03 | 0.02 |
| 17q#197902_197907 | 17 | 49651982-49827496 | 175515  |                                                   | 0.686886232 | 1 | 0.03 | 0.05 |
| 20q#216618_216626 | 20 | 48105413-48173920 | 68508   | Kua-JEV                                           | 0           | 1 | 0.00 | 0.00 |
| 20q#216652_216671 | 20 | 48475517-48709672 | 234156  | PTPN1, C20orf175                                  | 0           | 1 | 0.00 | 0.00 |
| 17q#198150_198161 | 17 | 53218911-53311464 | 92554   | MRPS23, CUEDC1                                    | 0.692294348 | 1 | 0.02 | 0.02 |
| 17q#197767_197768 | 17 | 46809273-46826980 | 17708   |                                                   | 1.398928118 | 1 | 0.03 | 0.02 |
| 17q#198162_198164 | 17 | 53327331-53348369 | 21039   | CUEDC1, BC056882                                  | 0.692294348 | 1 | 0.02 | 0.02 |
| 17q#198165_198171 | 17 | 53353771-53388527 | 34757   | BC056882                                          | 0.692294348 | 1 | 0.02 | 0.02 |
| 17q#196924_196934 | 17 | 39234426-39297977 | 63552   | MPP3, CD300LG                                     | 0           | 1 | 0.00 | 0.00 |
| 17q#197384_197390 | 17 | 43574909-43633423 | 58515   | SCAP1                                             | 0.692294348 | 1 | 0.02 | 0.02 |
| 17q#198941_198942 | 17 | 61079935-61092659 | 12725   | CCDC46                                            | 0.686886232 | 1 | 0.03 | 0.05 |
| 17q#198962_198976 | 17 | 61291390-61420767 | 129378  | CCDC46                                            | 0.686886232 | 1 | 0.03 | 0.05 |
| 17q#198030_198031 | 17 | 51797507-51808692 | 11186   | ANKFN1                                            | 0.692294348 | 1 | 0.02 | 0.02 |
| 17q#197398_197422 | 17 | 43729275-43966936 | 237662  | SCAP1, AK057253, HOXB1                            | 0.686886232 | 1 | 0.03 | 0.05 |
| 17q#197921_197922 | 17 | 50306625-50320232 | 13608   |                                                   | 0.692294348 | 1 | 0.02 | 0.02 |
| 17q#198048_198053 | 17 | 52005812-52056646 | 50835   | NOG                                               | 0.692294348 | 1 | 0.02 | 0.02 |
| 17q#198043_198047 | 17 | 51937807-51979224 | 41418   |                                                   | 0.692294348 | 1 | 0.02 | 0.02 |
| 17q#198172_198177 | 17 | 53397199-53427502 | 30304   | ZNF161                                            | 0.692294348 | 1 | 0.02 | 0.02 |
| 17q#198209_198211 | 17 | 53676133-53697118 | 20986   | LPO                                               | 1.398928118 | 1 | 0.03 | 0.02 |
| 17q#198668_198673 | 17 | 58198861-58237848 | 38988   | RNF190                                            | 0.686886232 | 1 | 0.03 | 0.05 |
| 17q#197232_197270 | 17 | 42290925-42639088 | 348164  | WNT9B, BC006271, GOSR2, RPRML, CR602880, CDC2     | 0           | 1 | 0.00 | 0.00 |
| 17q#197063_197065 | 17 | 40280923-40296131 | 15209   | HIGD1B, EFTUD2                                    | 0           | 1 | 0.00 | 0.00 |
| 17q#197066_197077 | 17 | 40305780-40373812 | 68033   | EFTUD2, CCDC103, GFAP, BC044933                   | 0           | 1 | 0.00 | 0.00 |
| 17q#199500_199514 | 17 | 68478958-68611409 | 132452  | SLC39A11                                          | 0.692294348 | 1 | 0.02 | 0.02 |
| 17q#196670_196691 | 17 | 37283882-37429930 | 146049  | ACLY, TTC25, CNP, DNAJC7, NKIRAS2                 | 0           | 1 | 0.00 | 0.00 |
| 17q#196826_196871 | 17 | 38306615-38710102 | 403488  | DC1, RPL27, IFI35, VAT1, RND2, BRCA1, NBR2, BC022 | 0           | 1 | 0.00 | 0.00 |
| 17q#196872_196879 | 17 | 38784700-38843074 | 58375   | BC035366, ARL4D                                   | 0           | 1 | 0.00 | 0.00 |
| 17q#198802_198804 | 17 | 59423034-59433733 | 10700   | AK094767, ICAM2                                   | 0.686886232 | 1 | 0.03 | 0.05 |
| 17q#198805_198812 | 17 | 59435360-59484604 | 49245   | ICAM2, AB209878, ERN1                             | 0.686886232 | 1 | 0.03 | 0.05 |
| 17q#198893_198903 | 17 | 60370406-60454198 | 83793   | AK098507, AK056627, GNA13                         | 0.686886232 | 1 | 0.03 | 0.05 |
| 17q#198904_198916 | 17 | 60462254-60615914 | 153661  | GNA13, CR613211, RGS9                             | 0.686886232 | 1 | 0.03 | 0.05 |
| 17q#198917_198919 | 17 | 60622836-60641951 | 19116   | RGS9                                              | 0.686886232 | 1 | 0.03 | 0.05 |
| 17q#197141_197142 | 17 | 40901702-40926210 | 24509   | PLEKHM1                                           | 0           | 1 | 0.00 | 0.00 |
| 17q#200477_200479 | 17 | 77535412-77558547 | 23136   | ASPSR1                                            | Inf         | 1 | 0.02 | 0.00 |
| 17q#197138_197140 | 17 | 40866689-40875342 | 8654    | LOC201175, PLEKHM1                                | 0           | 1 | 0.00 | 0.00 |
| 17q#197342_197343 | 17 | 43333246-43347686 | 14441   | SP2                                               | 0.692294348 | 1 | 0.02 | 0.02 |
| 20q#216392_216396 | 20 | 45368970-45418862 | 49893   | PRKCBP1                                           | 0           | 1 | 0.00 | 0.00 |
| 20q#216434_216436 | 20 | 45817492-45836137 | 18646   | SULF2                                             | 0           | 1 | 0.00 | 0.00 |
| 20q#216539_216585 | 20 | 47345647-47805492 | 459846  | AK055386, KCNB1, L02840, PTGIS, B4GALT5           | 0           | 1 | 0.00 | 0.00 |
| 17q#197894_197895 | 17 | 49437708-49471239 | 33532   |                                                   | 0.686886232 | 1 | 0.03 | 0.05 |
| 17q#197774_197784 | 17 | 46978432-47134057 | 155626  | CA10                                              | 1.044194198 | 1 | 0.05 | 0.05 |
| 17q#197892_197893 | 17 | 49373601-49397894 | 24294   |                                                   | 1.398928118 | 1 | 0.03 | 0.02 |
| 12q#156366_156433 | 12 | 63357829-64089777 | 731949  | SSF3, GNS, AB023201, AK123272, WIF1, LEMD3, MSF   | Inf         | 1 | 0.02 | 0.00 |

|                   |    |                     |         |                                                   |             |   |      |      |
|-------------------|----|---------------------|---------|---------------------------------------------------|-------------|---|------|------|
| 12q#156455_156672 | 12 | 64328071-67192627   | 2864557 | BC115393, CAND1, AB020636, AK055974, DYRK2, AK    | 0.692294348 | 1 | 0.02 | 0.02 |
| 7q#99429_99437    | 7  | 68720838-68792552   | 71715   | AUTS2                                             | 0           | 1 | 0.00 | 0.00 |
| 7q#99438_99448    | 7  | 68799399-68887937   | 88539   | AUTS2                                             | 0           | 1 | 0.00 | 0.00 |
| 17q#196628_196631 | 17 | 37019956-37041541   | 21586   | KRT16, AK125965                                   | 0           | 1 | 0.00 | 0.00 |
| 17q#196546_196561 | 17 | 36541969-36644061   | 102093  | 24-5, KRTAP4-4, KRTAP4-2, KRTAP4-10, BC065372, AJ | 0           | 1 | 0.00 | 0.00 |
| 17q#196632_196644 | 17 | 37046097-37129542   | 83446   | AK125965, AK094723, EIF1, GAST                    | 0           | 1 | 0.00 | 0.00 |
| 17q#196621_196627 | 17 | 36986323-37014813   | 28491   | KRT14                                             | 0           | 1 | 0.00 | 0.00 |
| 17q#196645_196646 | 17 | 37134361-37142558   | 8198    | HAP1                                              | 0           | 1 | 0.00 | 0.00 |
| 17q#196796_196825 | 17 | 38152688-38300118   | 147431  | JK4, CCDC56, CNTD1, BECN1, AK057221, PSME3, AO    | 0           | 1 | 0.00 | 0.00 |
| 17q#197900_197901 | 17 | 49585254-49629455   | 41202   |                                                   | 0.686886232 | 1 | 0.03 | 0.05 |
| 20q#216606_216617 | 20 | 47987034-48076790   | 89757   | ZNF313, SNAI1                                     | 0           | 1 | 0.00 | 0.00 |
| 20q#216627_216629 | 20 | 48182818-48204754   | 21937   | Kua-JEV                                           | 0           | 1 | 0.00 | 0.00 |
| 17q#198139_198149 | 17 | 53072736-53200535   | 127800  | MSI2                                              | 0.692294348 | 1 | 0.02 | 0.02 |
| 17q#197769_197771 | 17 | 46858804-46904271   | 45468   | AK126827                                          | 1.398928118 | 1 | 0.03 | 0.02 |
| 17q#198128_198138 | 17 | 52980150-53064365   | 84216   | MSI2                                              | 0.692294348 | 1 | 0.02 | 0.02 |
| 17q#198236_198267 | 17 | 53848952-54113214   | 264263  | RNF43, BC033020, MTMR4, SEPT4, C17orf47, TEX14    | 0.686886232 | 1 | 0.03 | 0.05 |
| 7q#105343_105417  | 7  | 136953134-137833383 | 880250  | GK1, CREB3L2, AK058142, AKR1D1, TRIM24, LOC1363   | 0           | 1 | 0.00 | 0.00 |
| 7q#106070_106137  | 7  | 143526118-144502606 | 976489  | TPK1                                              | 0           | 1 | 0.00 | 0.00 |
| 7q#106139_106149  | 7  | 144571285-144908662 | 337378  |                                                   | 0           | 1 | 0.00 | 0.00 |
| 7q#106064_106068  | 7  | 143321677-143512199 | 190523  | FLJ43692, AK125680, ARHGEF5                       | 0           | 1 | 0.00 | 0.00 |
| 7q#104403_104408  | 7  | 127410523-127442610 | 32088   | LEP, CR936803, AK001384, RBM28                    | 0           | 1 | 0.00 | 0.00 |
| 7q#106453_106460  | 7  | 147837913-147901485 | 63573   | CUL1                                              | 0           | 1 | 0.00 | 0.00 |
| 7q#107054_107072  | 7  | 154286988-154477184 | 190197  | BC031272, HTR5A, BX538209                         | 0           | 1 | 0.00 | 0.00 |
| 7p#98430_98475    | 7  | 48648057-49192826   | 544770  | AK096400                                          | 0           | 1 | 0.00 | 0.00 |
| 7p#98767_98776    | 7  | 54573834-54623536   | 49703   | SEC61G                                            | 0           | 1 | 0.00 | 0.00 |
| 7p#98844_98869    | 7  | 55487428-55770306   | 282879  | AJ001612, FLJ44060, BC094796, ZNF713              | 0           | 1 | 0.00 | 0.00 |
| 7q#100957_100998  | 7  | 87571174-88225231   | 654058  | STEAP4, FLJ32110                                  | 0           | 1 | 0.00 | 0.00 |
| 7q#101022_101028  | 7  | 88417961-88482694   | 64734   | FLJ32110                                          | 0           | 1 | 0.00 | 0.00 |
| 7q#101239_101295  | 7  | 91284997-91752338   | 467342  | CYP51A1, AK091323, KRIT1, AB037807, AL137349, G   | 0           | 1 | 0.00 | 0.00 |
| 7q#101309_101332  | 7  | 91852064-92055404   | 203341  | MGC40405, CDK6                                    | 0           | 1 | 0.00 | 0.00 |
| 7q#103004_103006  | 7  | 109012995-109077620 | 64626   |                                                   | 0           | 1 | 0.00 | 0.00 |
| 7p#98547_98548    | 7  | 50193005-50201923   | 8919    | ZNFN1A1                                           | 0           | 1 | 0.00 | 0.00 |
| 7q#102787_102792  | 7  | 106420736-106458807 | 38072   | HBP1, COG5                                        | 0           | 1 | 0.00 | 0.00 |
| 6q#86382_86393    | 6  | 64466439-64650972   | 184534  | PHF3, CR600797                                    | Inf         | 1 | 0.02 | 0.00 |
| 7q#101029_101032  | 7  | 88492117-88517317   | 25201   | FLJ32110                                          | 0           | 1 | 0.00 | 0.00 |
| 18q#206377_206401 | 18 | 75503709-75717209   | 213501  | FLJ25715, CTDP1                                   | 0           | 1 | 0.00 | 0.00 |
| 7q#100909_100956  | 7  | 87174683-87565990   | 391308  | DBF4, ADAM22, SRI, AK027807, STEAP4               | 0           | 1 | 0.00 | 0.00 |
| 7q#101333_101424  | 7  | 92063932-93000780   | 936849  | SAMD9, SAMD9L, LOC253012, FLJ20097, CALCR, BC     | 0           | 1 | 0.00 | 0.00 |
| 7q#102380_102381  | 7  | 102173851-102179107 | 5257    | FBXL13                                            | 0           | 1 | 0.00 | 0.00 |
| 7q#102422_102580  | 7  | 102600528-104206124 | 1605597 | C26A5, BC041378, RELN, ORC5L, LHFPL3, BC050337    | 0           | 1 | 0.00 | 0.00 |
| 7q#102615_102627  | 7  | 104522567-104627973 | 105407  | SRPK2, AY354201                                   | 0           | 1 | 0.00 | 0.00 |
| 7q#102762_102786  | 7  | 106123839-106403441 | 279603  | PIK3CG, PRKAR2B, HBP1                             | 0           | 1 | 0.00 | 0.00 |
| 7q#102793_102803  | 7  | 106464994-106546322 | 81329   | COG5                                              | 0           | 1 | 0.00 | 0.00 |
| 7q#102867_102946  | 7  | 107048288-107731114 | 682827  | K025044, DLD, LAMB1, LAMB4, NRCAM, IPLA2(GAMM     | 0           | 1 | 0.00 | 0.00 |
| 7q#103294_103303  | 7  | 112479211-112803842 | 324632  |                                                   | 0           | 1 | 0.00 | 0.00 |
| 18q#206409_206413 | 18 | 75803559-75839275   | 35717   | PQLC1, BC040056, TXNL4A                           | 0           | 1 | 0.00 | 0.00 |
| 7q#102338_102339  | 7  | 101550948-101565448 | 14501   | APS                                               | 0           | 1 | 0.00 | 0.00 |
| 2p#21964_21969    | 2  | 32929219-32986024   | 56806   | FLJ20272, AK095182                                | 0           | 1 | 0.00 | 0.00 |
| 7q#101425_101485  | 7  | 93008637-93569806   | 561170  | BC030956, TFFP2, GNGT1, GNGT1, CR749267, BET1     | 0           | 1 | 0.00 | 0.00 |
| 7q#102581_102614  | 7  | 104219849-104511434 | 291586  | AK124046, MLL5, SRPK2                             | 0           | 1 | 0.00 | 0.00 |

|                   |    |                     |         |                                                  |             |   |      |      |
|-------------------|----|---------------------|---------|--------------------------------------------------|-------------|---|------|------|
| 7q#102804_102866  | 7  | 10658836-107037604  | 478769  | 5, DUS4L, BCAP29, BC037315, SLC26A4, CBLL1, SLC  | 0           | 1 | 0.00 | 0.00 |
| 7q#103304_103330  | 7  | 112846039-113376542 | 530504  | PPP1R3A, BC036409, AK131266                      | 0           | 1 | 0.00 | 0.00 |
| 7q#103387_103466  | 7  | 114001351-115498064 | 1496714 | MDFIC, BC022431, TFEC, TES                       | 0           | 1 | 0.00 | 0.00 |
| 7q#103516_103521  | 7  | 116094332-116122163 | 27832   | CAPZA2                                           | 0           | 1 | 0.00 | 0.00 |
| 7q#102340_102353  | 7  | 101619311-101690918 | 71608   | BC063572, PRKRIP1, C7orf19, ALKBH4               | 0           | 1 | 0.00 | 0.00 |
| 17q#198928_198940 | 17 | 60932329-61073672   | 141344  | AXIN2, CCDC46                                    | 0.688886232 | 1 | 0.03 | 0.05 |
| 17q#198943_198961 | 17 | 61105102-61285606   | 180505  | CCDC46                                           | 0.688886232 | 1 | 0.03 | 0.05 |
| 17q#198923_198926 | 17 | 60708875-60842377   | 133503  |                                                  | 1.044194198 | 1 | 0.05 | 0.05 |
| 17q#197986_197987 | 17 | 51138955-51148901   | 9947    |                                                  | 0.692294348 | 1 | 0.02 | 0.02 |
| 17q#197998_198003 | 17 | 51256479-51429390   | 172912  |                                                  | 0.692294348 | 1 | 0.02 | 0.02 |
| 17q#198032_198042 | 17 | 51824981-51922933   | 97953   | ANKFN1                                           | 0.692294348 | 1 | 0.02 | 0.02 |
| 17q#198191_198208 | 17 | 53569588-53669139   | 99552   | OR4D2, EPX, MKS1                                 | 0.692294348 | 1 | 0.02 | 0.02 |
| 20q#215948_215984 | 20 | 41646743-42046260   | 399518  | SGK2, IFT52, MYBL2, FAM112A, AK096842, C20orf100 | Inf         | 1 | 0.02 | 0.00 |
| 20q#216007_216011 | 20 | 42258914-42280761   | 21848   | C20orf111, BC048277                              | 0           | 1 | 0.00 | 0.00 |
| 17q#199740_199747 | 17 | 70681733-70719726   | 37994   | SUMO2, NUP85                                     | 0.686886232 | 1 | 0.03 | 0.05 |
| 17q#199748_199757 | 17 | 70734683-70793530   | 58848   | NUP85, GGA3, MRPST, SLC25A19                     | 1.044194198 | 1 | 0.05 | 0.05 |
| 17q#200216_200244 | 17 | 75334877-75556076   | 220200  | CBX2, CBX8, CBX4, BX648922, AL512709, TBC1D16    | 0.692294348 | 1 | 0.02 | 0.02 |
| 17q#200259_200270 | 17 | 75688314-75773415   | 85102   | AB046860, GAA, DDX48, CARD14                     | 0.692294348 | 1 | 0.02 | 0.02 |
| 17q#197211_197216 | 17 | 41983407-42161423   | 178017  | LOC474170, NSF                                   | 0           | 1 | 0.00 | 0.00 |
| 17q#196530_196545 | 17 | 36259869-36534285   | 274417  | KRT12, KRT20, KRT23                              | 0           | 1 | 0.00 | 0.00 |
| 17q#196692_196698 | 17 | 37437076-37483960   | 46885   |                                                  | 0           | 1 | 0.00 | 0.00 |
| 17q#196699_196712 | 17 | 37492865-37548832   | 55968   | LGP2, GCN5L2, HSPB9, RAB5C                       | 0           | 1 | 0.00 | 0.00 |
| 17q#196713_196721 | 17 | 37559380-37599247   | 39868   | RAB5C, KCNH4, HCRT, LGP1                         | 0           | 1 | 0.00 | 0.00 |
| 17q#197199_197200 | 17 | 41558893-41566599   | 7707    | KIAA1267                                         | 0           | 1 | 0.00 | 0.00 |
| 17q#199515_199541 | 17 | 68629852-68839688   | 209837  | COG1, FAM104A, C17orf80, AY163812, BC015363, CD  | 0.692294348 | 1 | 0.02 | 0.02 |
| 17q#199545_199552 | 17 | 68878823-68943619   | 64797   | SDK2                                             | 0.692294348 | 1 | 0.02 | 0.02 |
| 17q#199879_199888 | 17 | 71695783-71782169   | 86387   | RNF157, FAM100B, QRICH2                          | 0.686886232 | 1 | 0.03 | 0.05 |
| 20q#216198_216203 | 20 | 43744428-43772051   | 27624   | WFDC10B, WFDC13                                  | 0           | 1 | 0.00 | 0.00 |
| 20q#217179_217195 | 20 | 56207876-56353237   | 145362  | C20orf86, AK024545, PPP4R1L, RAB22A              | 0.692294348 | 1 | 0.02 | 0.02 |
| 20q#217224_217275 | 20 | 56644136-57045182   | 401047  | B209296, NPEPL1, AJ251759, GNAS, TH1L, CTSZ, TUB | 0.692294348 | 1 | 0.02 | 0.02 |
| 17q#197272_197294 | 17 | 42652940-42873630   | 220691  | MYL4, X52005, ITGB3, C17orf57                    | 0           | 1 | 0.00 | 0.00 |
| 17q#197314_197323 | 17 | 43144374-43202650   | 58277   | TBKBP1, TBX21                                    | 0           | 1 | 0.00 | 0.00 |
| 17q#197324_197335 | 17 | 43219368-43281406   | 62039   | OSBPL7, MRPL10, LRRRC46, SCRND2, SP6             | Inf         | 1 | 0.02 | 0.00 |
| 17q#197336_197341 | 17 | 43286921-43322936   | 36016   | SP6, BC031827, AK091119                          | 0.692294348 | 1 | 0.02 | 0.02 |
| 20q#216390_216391 | 20 | 45345678-45356957   | 11280   | PRKCBP1                                          | 0           | 1 | 0.00 | 0.00 |
| 20q#216423_216433 | 20 | 45709177-45811524   | 102348  | NCOA3, SULF2                                     | 0           | 1 | 0.00 | 0.00 |
| 20q#217090_217110 | 20 | 55006289-55268720   | 262432  | BMP7                                             | 0           | 1 | 0.00 | 0.00 |
| 17q#196578_196620 | 17 | 36761288-36983333   | 222046  | K123843, KRTHA7, KRTHA8, KRTHA2, KRTHA5, KRTH    | 0           | 1 | 0.00 | 0.00 |
| 17q#196562_196573 | 17 | 36649589-36724937   | 75349   | AJ405951, KRTAP9-4, KRTAP17-1                    | 0           | 1 | 0.00 | 0.00 |
| 17q#196647_196661 | 17 | 37147098-37232439   | 85342   | JUP, SC65, FKBP10                                | 0           | 1 | 0.00 | 0.00 |
| 17q#196662_196669 | 17 | 37238664-37274343   | 35680   | NT5C3L, KLHL10, AK096415, KLHL11                 | 0           | 1 | 0.00 | 0.00 |
| 17q#196756_196763 | 17 | 37881724-37949669   | 67946   | ATP6V0A1, NAGLU                                  | Inf         | 1 | 0.02 | 0.00 |
| 17q#196764_196795 | 17 | 37953547-38144484   | 191295  | MC3IP, LOC162427, TUBG1, TUBG2, PLEKHH3, CCR10   | 0           | 1 | 0.00 | 0.00 |
| 17q#197196_197197 | 17 | 41533641-41544283   | 10643   | KIAA1267                                         | 0           | 1 | 0.00 | 0.00 |
| 17q#198054_198062 | 17 | 52081036-52268791   | 187756  | BC041467, DGKE                                   | 0.692294348 | 1 | 0.02 | 0.02 |
| 17q#198097_198099 | 17 | 52673637-52703666   | 30030   | MSI2                                             | 0.686886232 | 1 | 0.03 | 0.05 |
| 17q#198178_198187 | 17 | 53437573-53521826   | 84254   | SFRS1, CR936603, DYNLL2                          | 0.692294348 | 1 | 0.02 | 0.02 |
| 17q#198100_198109 | 17 | 52710917-52803520   | 92604   | MSI2                                             | 1.398928118 | 1 | 0.03 | 0.02 |
| 17q#198124_198127 | 17 | 52948114-52972269   | 24156   | MSI2                                             | 0.692294348 | 1 | 0.02 | 0.02 |
| 17q#198212_198227 | 17 | 53700840-53773585   | 72746   | LPO, MPO, BZRAP1, AK090885                       | 1.398928118 | 1 | 0.03 | 0.02 |
| 17q#198229_198235 | 17 | 53786433-53833591   | 47159   | RNF43                                            | 0.686886232 | 1 | 0.03 | 0.05 |
| 14q#172220_172224 | 14 | 49321174-49342648   | 21475   | SDCCAG1                                          | 0           | 1 | 0.00 | 0.00 |
| 14q#172225_172249 | 14 | 49351213-49529255   | 178043  | SDCCAG1, BC030291, AK092589, LOC283551           | 0           | 1 | 0.00 | 0.00 |
| 14q#172250_172297 | 14 | 49538528-49905096   | 366569  | LOC198913, C14orf138, SOS2, BC006117, L2HGDH, A  | 0           | 1 | 0.00 | 0.00 |
| 7q#99379_99428    | 7  | 67866207-68713750   | 847544  | AUTS2                                            | 0           | 1 | 0.00 | 0.00 |

|                   |    |                     |        |                                                    |             |   |      |      |
|-------------------|----|---------------------|--------|----------------------------------------------------|-------------|---|------|------|
| 12q#156312_156337 | 12 | 62791991-63018846   | 226856 | SRGAP1, FLJ32549, BC042855                         | 0           | 1 | 0.00 | 0.00 |
| 12q#156356_156365 | 12 | 63216474-63346656   | 130183 | RASSF3                                             | Inf         | 1 | 0.02 | 0.00 |
| 12q#156814_156864 | 12 | 68551941-69138680   | 586740 | C12orf28, CNOT2, KCNMB4                            | 0.692294348 | 1 | 0.02 | 0.02 |
| 14q#172397_172400 | 14 | 50814618-50894466   | 79849  |                                                    | 0           | 1 | 0.00 | 0.00 |
| 7q#105422_105428  | 7  | 137874988-137937598 | 62611  | ATP6V0A4                                           | 0           | 1 | 0.00 | 0.00 |
| 7q#105617_105658  | 7  | 139621006-139957730 | 336725 | MKRN1, DENND2A, ADCK2, NDUFB2, CR610711, BRA1      | 0           | 1 | 0.00 | 0.00 |
| 7q#105095_105190  | 7  | 134083181-134910095 | 826915 | MGC5242, HSPC049, LOC346673, CNOT4, NUP205, BC     | 0           | 1 | 0.00 | 0.00 |
| 14q#172433_172445 | 14 | 51230563-51356582   | 126020 | FRMD6, BC055421                                    | 0           | 1 | 0.00 | 0.00 |
| 14q#172378_172396 | 14 | 50596335-50802870   | 206536 | TRIM9, TXNDC                                       | 0           | 1 | 0.00 | 0.00 |
| 7q#99449_99460    | 7  | 68893211-68992308   | 99098  | AUTS2                                              | 0           | 1 | 0.00 | 0.00 |
| 7q#104570_104623  | 7  | 128855325-129276375 | 421051 | NRF1, UBE2H, ZC3HC1                                | 0           | 1 | 0.00 | 0.00 |
| 7q#104624_104650  | 7  | 129287989-129496921 | 208933 | KIAA0265, FLJ14803, LOC136263                      | 0           | 1 | 0.00 | 0.00 |
| 7q#104651_104706  | 7  | 129502741-129881627 | 378887 | 91284, CPA5, CPA1, TSGA14, AK055419, MEST, COPG    | 0           | 1 | 0.00 | 0.00 |
| 12q#156338_156355 | 12 | 63033029-63191762   | 158734 | BC042855, XPOT, BC009864, TBK1                     | 0           | 1 | 0.00 | 0.00 |
| 17q#198978_198996 | 17 | 61446310-61643557   | 197248 | CCDC46, APOH                                       | 0.686886232 | 1 | 0.03 | 0.05 |
| 17q#198920_198922 | 17 | 60654236-60678557   | 24322  | RGS9                                               | 0.686886232 | 1 | 0.03 | 0.05 |
| 17q#197981_197985 | 17 | 50986963-51115656   | 128694 |                                                    | 0.692294348 | 1 | 0.02 | 0.02 |
| 17q#198063_198092 | 17 | 52281004-52563278   | 282275 | DGKE, TRIM25, COIL, SCPEP1, AKAP1                  | 0.692294348 | 1 | 0.02 | 0.02 |
| 17q#198188_198190 | 17 | 53527858-53553153   | 25296  | AK124534                                           | 0.692294348 | 1 | 0.02 | 0.02 |
| 17q#197952_197967 | 17 | 50592113-50768885   | 176773 | STXBPA, HLF                                        | 0.692294348 | 1 | 0.02 | 0.02 |
| 17q#198110_198123 | 17 | 52808940-52941561   | 132622 | MSI2                                               | 0.692294348 | 1 | 0.02 | 0.02 |
| 7p#98779_98783    | 7  | 54698972-54841913   | 142942 |                                                    | 0           | 1 | 0.00 | 0.00 |
| 7q#103177_103191  | 7  | 111247249-111354648 | 107400 | DOCK4                                              | 0           | 1 | 0.00 | 0.00 |
| 7p#98777_98778    | 7  | 54646153-54663670   | 17518  |                                                    | 0           | 1 | 0.00 | 0.00 |
| 7p#98784_98832    | 7  | 54850863-55343589   | 492727 | EGFR, K03193, LANCL2, AK128355, ECOP               | 0           | 1 | 0.00 | 0.00 |
| 7q#103029_103035  | 7  | 109822544-109921130 | 98587  | IMMP2L                                             | 0           | 1 | 0.00 | 0.00 |
| 7q#103119_103166  | 7  | 110660687-111149951 | 489265 | IMMP2L, DOCK4                                      | 0           | 1 | 0.00 | 0.00 |
| 12q#161737_161749 | 12 | 130301566-130445325 | 143760 | AK098523                                           | 0           | 1 | 0.00 | 0.00 |
| 7q#102948_102964  | 7  | 107748652-107986606 | 237955 | IPLA2(GAMMA), THAP5, DNAJB9                        | 0           | 1 | 0.00 | 0.00 |
| 7q#101831_101832  | 7  | 97584545-97591357   | 6813   | BAIAP2L1                                           | 0           | 1 | 0.00 | 0.00 |
| 12q#161750_161767 | 12 | 130457574-130790679 | 333106 | BX648825                                           | 0           | 1 | 0.00 | 0.00 |
| 7q#102965_102966  | 7  | 108013368-108034828 | 21461  |                                                    | 0           | 1 | 0.00 | 0.00 |
| 7q#101833_101868  | 7  | 97597897-98115398   | 517502 | BAIAP2L1, NPTX2, TMEM130                           | 0           | 1 | 0.00 | 0.00 |
| 7q#101823_101830  | 7  | 97530418-97576269   | 45852  | BRI3, BAIAP2L1                                     | 0           | 1 | 0.00 | 0.00 |
| 7q#102237_102254  | 7  | 100560562-100694991 | 134430 | EMID2                                              | 0           | 1 | 0.00 | 0.00 |
| 7q#101971_102005  | 7  | 98835468-99104297   | 268830 | B, BX640720, CYP3A5, CYP3A7, AJ563379, CYP3A4, C   | 0           | 1 | 0.00 | 0.00 |
| 17q#200483_200497 | 17 | 77568723-77646444   | 77722  | F338198, STRA13, LRRC45, RAC3, RFNG, DUS1L, FAS    | 0           | 1 | 0.00 | 0.00 |
| 17q#200498_200500 | 17 | 77653668-77671294   | 17627  | CCDC57                                             | 0           | 1 | 0.00 | 0.00 |
| 17q#200605_200619 | 17 | 78449924-78572260   | 122337 | TBCD, B3GNTL1                                      | 0           | 1 | 0.00 | 0.00 |
| 20q#215938_215947 | 20 | 41568296-41642386   | 74091  | L3MBTL, AB014581, AY927520, SGK2                   | Inf         | 1 | 0.02 | 0.00 |
| 20q#217779_217810 | 20 | 61757532-61977283   | 219752 | B, ARFRP1, ZGPAT, SLC2A4RG, BTBD4, BC052269, BC    | Inf         | 1 | 0.02 | 0.00 |
| 17q#200182_200205 | 17 | 74725786-74967556   | 241771 | LOC146713                                          | 0.692294348 | 1 | 0.02 | 0.02 |
| 17q#200206_200215 | 17 | 74973934-75325481   | 351548 | BC008248, ENPP7                                    | 0.692294348 | 1 | 0.02 | 0.02 |
| 17q#200352_200364 | 17 | 76534041-76606768   | 72728  | KIAA1303, CHMP6                                    | 0           | 1 | 0.00 | 0.00 |
| 20q#215810_215824 | 20 | 40238644-40352826   | 114183 | PTPRT                                              | Inf         | 1 | 0.02 | 0.00 |
| 20q#215825_215826 | 20 | 40366638-40377753   | 11116  | PTPRT                                              | Inf         | 1 | 0.02 | 0.00 |
| 20q#215985_216006 | 20 | 42057214-42252325   | 195112 | C20orf100, JPH2                                    | 0           | 1 | 0.00 | 0.00 |
| 17q#196387_196435 | 17 | 35296845-35619480   | 322636 | PSMD3, CSF3, THRAP4, THRA, NR1D1, AL049450, CR     | 1.044194198 | 1 | 0.05 | 0.05 |
| 17q#196436_196447 | 17 | 35631139-35708883   | 77745  | WIRE, CDC6                                         | 1.413401461 | 1 | 0.07 | 0.05 |
| 17q#199542_199544 | 17 | 68845612-68865152   | 19541  | SDK2                                               | 0.692294348 | 1 | 0.02 | 0.02 |
| 17q#199870_199878 | 17 | 71626372-71687469   | 61098  | FOXJ1, AK093500, RNF157                            | 0.686886232 | 1 | 0.03 | 0.05 |
| 17q#200115_200128 | 17 | 74172980-74304673   | 131694 | BC034158, PSCD1, USP36                             | 0.692294348 | 1 | 0.02 | 0.02 |
| 17q#200282_200302 | 17 | 75864891-76052258   | 187368 | 1618, AB046838, C17orf27, AK125341, FLJ35220, AK09 | 0           | 1 | 0.00 | 0.00 |
| 20q#216204_216224 | 20 | 43784107-43897501   | 113395 | WFDC3, DNTTIP1, UBE2C, TNNC2, C20orf161            | 0           | 1 | 0.00 | 0.00 |
| 20q#216266_216283 | 20 | 44122079-44257443   | 135365 | SLC12A5, NCOA5, CD40, AK057411, CDH22              | 0           | 1 | 0.00 | 0.00 |



|                   |    |                     |         |                                                  |             |   |      |      |
|-------------------|----|---------------------|---------|--------------------------------------------------|-------------|---|------|------|
| 20q#217170_217178 | 20 | 56094268-56199104   | 104837  | C20orf85                                         | 0.692294348 | 1 | 0.02 | 0.02 |
| 3q#53681_53682    | 3  | 196949122-196954067 | 4946    | MUC20                                            | 0           | 1 | 0.00 | 0.00 |
| 17q#195590_195631 | 17 | 27112936-27590665   | 477730  | C17orf79, UTP6, SUZ12, LRRRC37B, RHOT1           | 0           | 1 | 0.00 | 0.00 |
| 17q#195726_195731 | 17 | 28427295-28468910   | 41616   | ACCN1                                            | 0           | 1 | 0.00 | 0.00 |
| 17q#197295_197296 | 17 | 42898150-42906988   | 8839    | BC067758                                         | 0           | 1 | 0.00 | 0.00 |
| 17q#196521_196529 | 17 | 36203569-36250731   | 47163   | KRT25D, KRT10, TMEM99                            | 0           | 1 | 0.00 | 0.00 |
| 17q#197301_197304 | 17 | 43027760-43048163   | 20404   | NPEPPS                                           | 0           | 1 | 0.00 | 0.00 |
| 17q#197305_197307 | 17 | 43059177-43079178   | 20002   |                                                  | 0           | 1 | 0.00 | 0.00 |
| 17q#197308_197313 | 17 | 43085236-43137894   | 52659   | KPNB1, TBKBP1                                    | 0           | 1 | 0.00 | 0.00 |
| 8p#108516_108525  | 8  | 12652662-12770657   | 117996  | LONRF1, BC043360                                 | 0           | 1 | 0.00 | 0.00 |
| 6q#86960_86969    | 6  | 73488703-73558500   | 69798   | KCNQ5                                            | Inf         | 1 | 0.02 | 0.00 |
| 7p#98673_98674    | 7  | 52290258-52343180   | 52923   |                                                  | 0           | 1 | 0.00 | 0.00 |
| 7p#98686_98710    | 7  | 52680506-53436458   | 755953  | DKFZp564N2472                                    | 0           | 1 | 0.00 | 0.00 |
| 8p#108356_108357  | 8  | 10627804-10632774   | 4971    | BC043573                                         | 0           | 1 | 0.00 | 0.00 |
| 8p#108526_108532  | 8  | 12799414-12890809   | 81396   | C8orf79                                          | 0           | 1 | 0.00 | 0.00 |
| 6q#86873_86900    | 6  | 72460287-72847730   | 387444  | BC038189, RIMS1                                  | Inf         | 1 | 0.02 | 0.00 |
| 8p#108138_108195  | 8  | 8148437-8911235     | 762799  | 833872, AK122582, CLDN23, BC014226, MFHAS1, THE  | 0           | 1 | 0.00 | 0.00 |
| 8p#108533_108551  | 8  | 12892788-13063053   | 170266  | C8orf79, KIAA1456, DLC1                          | 0           | 1 | 0.00 | 0.00 |
| 8p#108222_108245  | 8  | 9218551-9501804     | 283254  | M27826, TNKS                                     | 0           | 1 | 0.00 | 0.00 |
| 8p#108349_108355  | 8  | 10574939-10620151   | 45213   | C8orf74, AK127545, SOX7                          | 0           | 1 | 0.00 | 0.00 |
| 8p#108879_108906  | 8  | 17610506-17839034   | 228529  | MTUS1, FGL1, BC073919, PCM1                      | 0           | 1 | 0.00 | 0.00 |
| 7q#101199_101235  | 7  | 90633327-91255193   | 621867  | MTERF, AKAP9                                     | 0           | 1 | 0.00 | 0.00 |
| 7q#101296_101308  | 7  | 91761343-91842886   | 81544   | PEX1, DKFZP564O0523, CR936726, MGC40405          | 0           | 1 | 0.00 | 0.00 |
| 8p#108933_109006  | 8  | 18145489-18940231   | 794743  | NAT2, BC011238, PSD3                             | 0           | 1 | 0.00 | 0.00 |
| 7p#98476_98520    | 7  | 49216092-49848044   | 631953  | UNQ739, ZPBP                                     | 0           | 1 | 0.00 | 0.00 |
| 7p#98762_98766    | 7  | 54450685-54558940   | 108256  |                                                  | 0           | 1 | 0.00 | 0.00 |
| 7p#98981_98984    | 7  | 57330922-57368857   | 37936   | AK131575                                         | 0           | 1 | 0.00 | 0.00 |
| 7p#98986_98994    | 7  | 57436605-57738171   | 301567  |                                                  | 0           | 1 | 0.00 | 0.00 |
| 8p#108196_108221  | 8  | 8924973-9200992     | 276020  | THEX1, PPP1R3B, M27826                           | 0           | 1 | 0.00 | 0.00 |
| 8p#108246_108272  | 8  | 9510433-9790733     | 280301  | TNKS, M27826                                     | 0           | 1 | 0.00 | 0.00 |
| 8p#108907_108928  | 8  | 17845524-18090054   | 244531  | PCM1, ASAH1, CR613267                            | 0           | 1 | 0.00 | 0.00 |
| 8p#108828_108878  | 8  | 17131040-17603037   | 471998  | T7, VPS37A, AL834189, MTMR7, SLC7A2, PDGFRL, M   | 0           | 1 | 0.00 | 0.00 |
| 8p#108929_108932  | 8  | 18100150-18136473   | 36324   | NAT1                                             | 0           | 1 | 0.00 | 0.00 |
| 7q#100999_101021  | 7  | 88235862-88408447   | 172586  | FLJ32110                                         | 0           | 1 | 0.00 | 0.00 |
| 7q#101040_101144  | 7  | 88601281-90094982   | 1493702 | TEAP1, STEAP2, FLJ21062, AL137642, LOC85865, CLL | 0           | 1 | 0.00 | 0.00 |
| 7q#101236_101238  | 7  | 91261642-91275659   | 14018   | AKAP9                                            | 0           | 1 | 0.00 | 0.00 |
| 6p#86172_86173    | 6  | 57298746-57307622   | 8877    | PRIM2A                                           | 0           | 1 | 0.00 | 0.00 |
| 18q#206402_206408 | 18 | 75729077-75789273   | 60197   | KCNG2, PQLC1                                     | 0           | 1 | 0.00 | 0.00 |
| 7p#98521_98546    | 7  | 49853981-50185291   | 331311  | ZPBP, ZNFN1A1                                    | 0           | 1 | 0.00 | 0.00 |
| 7p#98613_98672    | 7  | 50932836-52268475   | 1335640 | COBL                                             | 0           | 1 | 0.00 | 0.00 |
| 7p#98711_98761    | 7  | 53458574-54427483   | 968910  | FLJ45974, MGC33530, CR613464, BC045679           | 0           | 1 | 0.00 | 0.00 |
| 6q#86279_86317    | 6  | 62717214-63087061   | 369848  | KHDRBS2                                          | Inf         | 1 | 0.02 | 0.00 |
| 6q#86330_86332    | 6  | 63629436-63688066   | 58631   |                                                  | Inf         | 1 | 0.02 | 0.00 |
| 6q#86394_86396    | 6  | 64677226-64750789   | 73564   |                                                  | Inf         | 1 | 0.02 | 0.00 |
| 7q#101033_101039  | 7  | 88531020-88593322   | 62303   | FLJ32110                                         | 0           | 1 | 0.00 | 0.00 |
| 6p#86168_86171    | 6  | 57267923-57297212   | 29290   | PRIM2A                                           | 0           | 1 | 0.00 | 0.00 |
| 7q#100873_100908  | 7  | 86874749-87163200   | 288452  | ABCB1, RPIB9, AY033596, MCFF, DBF4               | 0           | 1 | 0.00 | 0.00 |
| 7q#101515_101534  | 7  | 93917164-94178386   | 261223  | SGCE, PEG10                                      | 0           | 1 | 0.00 | 0.00 |
| 6q#86262_86278    | 6  | 62546543-62706313   | 159771  | KHDRBS2                                          | Inf         | 1 | 0.02 | 0.00 |
| 7q#102363_102379  | 7  | 10192941-102168973  | 239733  | MGC35361, FBXL13                                 | 0           | 1 | 0.00 | 0.00 |
| 2p#21942_21963    | 2  | 32754958-32923890   | 168933  | BIRC6, AK021967, FLJ20272                        | 0           | 1 | 0.00 | 0.00 |
| 7q#100827_100872  | 7  | 86456855-86869770   | 412916  | DMTF1, C7orf23, AB007455, CROT, ABCB4, ABCB1     | 0           | 1 | 0.00 | 0.00 |
| 6p#85814_85830    | 6  | 52991076-53125875   | 134800  | ICK, FBXO9, GCM1                                 | 0           | 1 | 0.00 | 0.00 |
| 6p#85849_85850    | 6  | 53385003-53426107   | 41105   |                                                  | 0           | 1 | 0.00 | 0.00 |
| 6q#86242_86261    | 6  | 62040890-62537012   | 496123  | KHDRBS2                                          | Inf         | 1 | 0.02 | 0.00 |

|                   |    |                     |         |                                                    |             |   |      |      |
|-------------------|----|---------------------|---------|----------------------------------------------------|-------------|---|------|------|
| 7q#100719_100815  | 7  | 84447926-86306374   | 1858449 | GRM3, KIAA1324L                                    | 0           | 1 | 0.00 | 0.00 |
| 7q#101486_101514  | 7  | 93590979-93907499   | 316521  | COL1A2, CASD1, SGCE                                | 0           | 1 | 0.00 | 0.00 |
| 2p#21920_21941    | 2  | 32554194-32744374   | 190181  | BIRC6                                              | 0           | 1 | 0.00 | 0.00 |
| 6p#85799_85813    | 6  | 52860391-52982242   | 121852  | GSTA3, GSTA4, ICK                                  | 0           | 1 | 0.00 | 0.00 |
| 6p#85831_85848    | 6  | 53132330-53362013   | 229684  | ELOVL5                                             | 0           | 1 | 0.00 | 0.00 |
| 6p#85851_85855    | 6  | 53454408-53501982   | 47575   | GCLC                                               | 0           | 1 | 0.00 | 0.00 |
| 6p#85856_85883    | 6  | 53510117-53821438   | 311322  | GCLC, AK126334, KBTBD1, LRRC1                      | 0           | 1 | 0.00 | 0.00 |
| 7q#100816_100826  | 7  | 86312053-86447549   | 135497  | KIAA1324L, AK054776, DMTF1                         | 0           | 1 | 0.00 | 0.00 |
| 7q#101633_101650  | 7  | 95102722-95269908   | 167187  | DYNC111                                            | 0           | 1 | 0.00 | 0.00 |
| 21q#221125_221142 | 21 | 45715720-45839114   | 123395  | COL18A1, SLC19A1, AB073349                         | 0           | 1 | 0.00 | 0.00 |
| 20q#217531_217540 | 20 | 59930654-60027624   | 96971   | CDH4, AK092092, TAF4                               | Inf         | 1 | 0.02 | 0.00 |
| 20q#217600_217630 | 20 | 60418677-60753516   | 334840  | orf151, GATA5, FLJ30313, C20orf166, AK056716, SLCC | 0           | 1 | 0.00 | 0.00 |
| 20q#217677_217703 | 20 | 61057479-61255819   | 198341  | C20orf59, AK128329, C20orf51                       | 0           | 1 | 0.00 | 0.00 |
| 20q#216314_216389 | 20 | 44590549-45336250   | 745702  | C13A3, TP53RK, SLC2A10, BC065739, EYA2, PRKCB1     | 0           | 1 | 0.00 | 0.00 |
| 20q#216398_216422 | 20 | 45443007-45696170   | 253164  | NCOA3                                              | 0           | 1 | 0.00 | 0.00 |
| 20q#216284_216313 | 20 | 44267211-44580064   | 312854  | CDH22, SLC35C2, ELMO2, AL831934, ZNF334            | 0           | 1 | 0.00 | 0.00 |
| 20q#217111_217135 | 20 | 55279536-55506726   | 227191  | BC047656, SPO11, RAE1, AK096426, RNPC1, CTCFL      | 0           | 1 | 0.00 | 0.00 |
| 17q#196574_196577 | 17 | 36731647-36757775   | 26129   | KRTHA3A                                            | 0           | 1 | 0.00 | 0.00 |
| 17q#196722_196732 | 17 | 37607168-37676998   | 69831   | STAT5B                                             | 0           | 1 | 0.00 | 0.00 |
| 17q#198999_199002 | 17 | 61671757-61726475   | 54719   |                                                    | 0.686886232 | 1 | 0.03 | 0.05 |
| 17q#197976_197980 | 17 | 50869225-50963490   | 94266   |                                                    | 0.692294348 | 1 | 0.02 | 0.02 |
| 7q#106577_106581  | 7  | 148975850-148993303 | 23454   | AB011115                                           | 0           | 1 | 0.00 | 0.00 |
| 7q#106810_106816  | 7  | 150968937-151004195 | 35259   | PRKAG2                                             | 0           | 1 | 0.00 | 0.00 |
| 12q#157204_157229 | 12 | 74070354-74455291   | 384938  | CAPS2, MGC39497, BC016749, GLIPR1, HRB2            | 0           | 1 | 0.00 | 0.00 |
| 14q#172197_172219 | 14 | 49167607-49316413   | 148807  | C14orf104, POLE2, KLHDC1, AK056298, KLHDC2         | 0           | 1 | 0.00 | 0.00 |
| 14q#172809_172812 | 14 | 54856869-54888778   | 31910   | FBXO34                                             | 0           | 1 | 0.00 | 0.00 |
| 14q#172187_172196 | 14 | 49121427-49164552   | 43126   | RPS29, BX161511, PPIL5, RPL36AL, MGAT2, C14orf104  | 0           | 1 | 0.00 | 0.00 |
| 7q#99373_99378    | 7  | 67662745-67845119   | 182375  |                                                    | 0           | 1 | 0.00 | 0.00 |
| 12q#156193_156217 | 12 | 61275109-61451601   | 176493  | AL834320, C12orf61, AB032983                       | Inf         | 1 | 0.02 | 0.00 |
| 12q#156270_156280 | 12 | 62402776-62519778   | 117003  | TMEM5                                              | Inf         | 1 | 0.02 | 0.00 |
| 12q#156281_156311 | 12 | 62526821-62784242   | 257422  | SRGAP1                                             | 0           | 1 | 0.00 | 0.00 |
| 7p#98271_98314    | 7  | 46907636-47417981   | 510346  | TNS3, AB208995                                     | 0           | 1 | 0.00 | 0.00 |
| 14q#172108_172122 | 14 | 47176855-47364829   | 187975  | AY369208, AK056212                                 | 0           | 1 | 0.00 | 0.00 |
| 14q#172136_172141 | 14 | 47744930-47919590   | 174661  |                                                    | 0           | 1 | 0.00 | 0.00 |
| 7q#105812_105836  | 7  | 141258800-141480125 | 221326  | LOC93432, AK000645, AK131337, TRY1, BC047233, A    | 0           | 1 | 0.00 | 0.00 |
| 14q#172298_172311 | 14 | 49913549-50022606   | 109058  | CDKL1, AF390028, MAP4K5                            | 0           | 1 | 0.00 | 0.00 |
| 7p#97677_97681    | 7  | 39520061-39609282   | 89222   | RALA, BC038571                                     | 0           | 1 | 0.00 | 0.00 |
| 14q#172496_172502 | 14 | 51848139-51885349   | 37211   | PTGER2                                             | 0           | 1 | 0.00 | 0.00 |
| 14q#172792_172808 | 14 | 54717065-54847309   | 130245  | DLG7, FBXO34                                       | 0           | 1 | 0.00 | 0.00 |
| 14q#171679_171685 | 14 | 39924084-39986502   | 62419   |                                                    | 0           | 1 | 0.00 | 0.00 |
| 12q#156865_156866 | 12 | 69164231-69189040   | 24810   | BC031864                                           | 0.692294348 | 1 | 0.02 | 0.02 |
| 7q#104434_104440  | 7  | 127631569-127674069 | 42501   | IMPDH1                                             | 0           | 1 | 0.00 | 0.00 |
| 7q#105418_105421  | 7  | 137843025-137866913 | 23889   | ATP6V0A4                                           | 0           | 1 | 0.00 | 0.00 |
| 7q#105429_105602  | 7  | 137947543-139504371 | 1556829 | AK098644, HSPC268, LUC7L2, FLJ44186, AK057548, B   | 0           | 1 | 0.00 | 0.00 |
| 7q#105613_105616  | 7  | 139594412-139616205 | 21794   | MKRN1                                              | 0           | 1 | 0.00 | 0.00 |
| 7q#105659_105660  | 7  | 139968769-139978623 | 9855    | BRAF                                               | 0           | 1 | 0.00 | 0.00 |
| 7q#105738_105804  | 7  | 140673101-141183412 | 510312  | LJ40852, SSBP1, TAS2R3, TAS2R4, TAS2R5, LOC1362    | 0           | 1 | 0.00 | 0.00 |
| 14q#172142_172145 | 14 | 47937759-48005501   | 67743   |                                                    | 0           | 1 | 0.00 | 0.00 |
| 14q#172149_172156 | 14 | 48145086-48419252   | 274167  |                                                    | 0           | 1 | 0.00 | 0.00 |
| 7q#104475_104479  | 7  | 128014258-128035273 | 21016   | NAG6                                               | 0           | 1 | 0.00 | 0.00 |
| 7q#104489_104516  | 7  | 128098529-128305634 | 207106  | ATP6V1F, AK090684, AK122706, IRF5, TNPO3           | 0           | 1 | 0.00 | 0.00 |
| 7q#105041_105048  | 7  | 133561884-133612208 | 50325   | AKR1B1                                             | 0           | 1 | 0.00 | 0.00 |
| 14q#172312_172376 | 14 | 50027391-50572304   | 544914  | 161, AL833591, SPG3A, SAV1, NIN, C14orf29, PYGL, A | 0           | 1 | 0.00 | 0.00 |
| 14q#172424_172432 | 14 | 51148183-51219595   | 71413   | AL833158, FRMD6                                    | 0           | 1 | 0.00 | 0.00 |
| 14q#172660_172669 | 14 | 53487558-53661731   | 174174  | BMP4, AK096400                                     | 0           | 1 | 0.00 | 0.00 |

|            |        |    |                     |         |                                                  |             |   |      |      |
|------------|--------|----|---------------------|---------|--------------------------------------------------|-------------|---|------|------|
| 7q#100014  | 100022 | 7  | 75506601-75560740   | 54140   | AK094263, BC029292, FLJ37078                     | 0           | 1 | 0.00 | 0.00 |
| 7q#104441  | 104445 | 7  | 127681019-127703347 | 22329   | HIG2                                             | 0           | 1 | 0.00 | 0.00 |
| 7q#105913  | 105936 | 7  | 142104175-142288840 | 184666  | TRPV5, C7orf34, KEL, OR6V1, AF286696             | 0           | 1 | 0.00 | 0.00 |
| 7q#104456  | 104474 | 7  | 127894166-128006848 | 112683  | AK130751, LOC346653, NYD-SP18, CALU, OPN1SW      | 0           | 1 | 0.00 | 0.00 |
| 7q#104543  | 104569 | 7  | 128549560-128846858 | 297299  | KIAA0828, FAM40B, NRF1                           | 0           | 1 | 0.00 | 0.00 |
| 7q#104786  | 104813 | 7  | 130760465-131325652 | 565188  | AK098603, AB046770                               | 0           | 1 | 0.00 | 0.00 |
| 7q#105006  | 105040 | 7  | 133181945-133520429 | 338485  | EXOC4, FLJ32786, SLC35B4                         | 0           | 1 | 0.00 | 0.00 |
| 7q#105049  | 105094 | 7  | 133624052-134077686 | 453635  | AKR1B10, BT006794, BPGM, CALD1                   | 0           | 1 | 0.00 | 0.00 |
| 7q#105603  | 105612 | 7  | 139517838-139587574 | 69737   | SLC37A3, AF336886, RAB19B                        | 0           | 1 | 0.00 | 0.00 |
| 7q#105805  | 105810 | 7  | 141189966-141238442 | 48477   | MGAM                                             | 0           | 1 | 0.00 | 0.00 |
| 7q#105838  | 105860 | 7  | 141511878-141686065 | 174188  | AJ007770, LOC647353                              | 0           | 1 | 0.00 | 0.00 |
| 7q#102069  | 102071 | 7  | 99454349-99463740   | 9392    | STAG3, GATS                                      | 0           | 1 | 0.00 | 0.00 |
| 7q#99461   | 99489  | 7  | 69007609-69229466   | 221858  | AUTS2                                            | 0           | 1 | 0.00 | 0.00 |
| 7q#99506   | 99509  | 7  | 69361455-69381155   | 19701   | AUTS2                                            | 0           | 1 | 0.00 | 0.00 |
| 7q#100023  | 100037 | 7  | 75567050-75668124   | 101075  | HSPB1, AK092550, YWHAG, SRCRB4D                  | 0           | 1 | 0.00 | 0.00 |
| 7q#100038  | 100046 | 7  | 75675224-75792291   | 117068  | SRCRB4D, ZP3, DTX2, BC013192, UPK3B              | 0           | 1 | 0.00 | 0.00 |
| 7q#104707  | 104710 | 7  | 129886983-129915504 | 28522   |                                                  | 0           | 1 | 0.00 | 0.00 |
| 7q#104711  | 104741 | 7  | 129949943-130208160 | 258218  | CR618431, BC039420                               | 0           | 1 | 0.00 | 0.00 |
| 7q#104742  | 104785 | 7  | 130217126-130722607 | 505482  | BC039420, AK054623, MKLN1, PODXL                 | 0           | 1 | 0.00 | 0.00 |
| 7q#106461  | 106471 | 7  | 147909376-148004894 | 95519   | CUL1, EZH2                                       | 0           | 1 | 0.00 | 0.00 |
| 7q#106995  | 107011 | 7  | 153675214-153888665 | 213452  | DPP6                                             | 0           | 1 | 0.00 | 0.00 |
| 7q#107012  | 107053 | 7  | 153893837-154274263 | 380427  | DPP6, BC033053, PAXIP1                           | 0           | 1 | 0.00 | 0.00 |
| 7q#107073  | 107075 | 7  | 154491671-154518011 | 26341   |                                                  | 0           | 1 | 0.00 | 0.00 |
| 7q#107286  | 107294 | 7  | 156658813-156726255 | 67443   | DNAJB6                                           | 0           | 1 | 0.00 | 0.00 |
| 7q#107295  | 107302 | 7  | 156732486-156794303 | 61818   | BC039304                                         | 0           | 1 | 0.00 | 0.00 |
| 7q#107313  | 107347 | 7  | 156861989-157131384 | 269396  | PTPRN2                                           | 0           | 1 | 0.00 | 0.00 |
| 7q#107348  | 107366 | 7  | 157144464-157312917 | 168454  | PTPRN2                                           | 0           | 1 | 0.00 | 0.00 |
| 7q#107433  | 107436 | 7  | 157898514-157922537 | 24024   |                                                  | 0           | 1 | 0.00 | 0.00 |
| 7q#107437  | 107445 | 7  | 157929406-157995928 | 66523   | BC028618, LUZP5                                  | 0           | 1 | 0.00 | 0.00 |
| 12q#157247 | 157339 | 12 | 74721164-76340350   | 1619187 | PTL1, AK027213, BBS10, OSBPL8, ZDHC17, CSRP2, E  | 0           | 1 | 0.00 | 0.00 |
| 12q#157355 | 157362 | 12 | 76736407-76792190   | 55784   | NAV3                                             | 0           | 1 | 0.00 | 0.00 |
| 12q#157486 | 157491 | 12 | 78284467-78329803   | 45337   | SYT1                                             | Inf         | 1 | 0.02 | 0.00 |
| 20q#217864 | 217870 | 20 | 62331054-62379118   | 48065   | MYT1, AB028973, PCMTD2, BC032332                 | 0           | 1 | 0.00 | 0.00 |
| 20q#217743 | 217758 | 20 | 61535454-61633917   | 98464   | KCNQ2, AL080160, EEF1A2, PTK6                    | Inf         | 1 | 0.02 | 0.00 |
| 20q#217767 | 217778 | 20 | 61678601-61752151   | 73551   | GMEB2, AB033095, STMN3                           | Inf         | 1 | 0.02 | 0.00 |
| 20q#217856 | 217863 | 20 | 62259326-62323759   | 64434   | BC062313, MYT1                                   | 0           | 1 | 0.00 | 0.00 |
| 17q#200501 | 200512 | 17 | 77678681-77771653   | 92973   | CCDC57, AF338198                                 | 0           | 1 | 0.00 | 0.00 |
| 17q#200513 | 200540 | 17 | 77781108-77932449   | 151342  | A3, CSNK1D, AF338198, CD7, SECTM1, FLJ35767, AF  | 0           | 1 | 0.00 | 0.00 |
| 17q#200569 | 200598 | 17 | 78163171-78395973   | 232803  | WDR45L, RAB40B, BC033940, FN3KRP, FN3K, TBCD     | 0           | 1 | 0.00 | 0.00 |
| 20q#217759 | 217766 | 20 | 61637413-61669895   | 32483   | PTK6, SRMS, C20orf195, PRIC285                   | Inf         | 1 | 0.02 | 0.00 |
| 20q#215584 | 215619 | 20 | 36501222-36834307   | 333086  | LOC128439, KIAA1219, SMAF1, SLC32A1, ACTR5       | 0           | 1 | 0.00 | 0.00 |
| 20q#215827 | 215937 | 20 | 40393204-41558974   | 1165771 | PTPRT, SFRS6, AK021609                           | Inf         | 1 | 0.02 | 0.00 |
| 20q#217723 | 217732 | 20 | 61371989-61439946   | 67958   | ARFGAP1, COL20A1, AB040943                       | Inf         | 1 | 0.02 | 0.00 |
| 20q#217811 | 217836 | 20 | 61982319-62149672   | 167354  | JC5, CR595822, UCKL1, GM632, SAMD10, PRPF6, BC   | 0           | 1 | 0.00 | 0.00 |
| 17q#200047 | 200052 | 17 | 73624567-73645866   | 21300   | TMC6, TMC8                                       | 0.692294348 | 1 | 0.02 | 0.02 |
| 17q#200129 | 200162 | 17 | 74313965-74544646   | 230682  | SP36, TIMP2, LGALS3BP, CANT1, BC039683, C1QTNF   | 0.692294348 | 1 | 0.02 | 0.02 |
| 17q#200163 | 200170 | 17 | 74549585-74594440   | 44856   | C1QTNF1, FLJ21865                                | 0.692294348 | 1 | 0.02 | 0.02 |
| 17q#200171 | 200172 | 17 | 74600990-74606811   | 5822    | AK124644, AK128131                               | 0.692294348 | 1 | 0.02 | 0.02 |
| 17q#200320 | 200350 | 17 | 76214811-76506108   | 291298  | KIAA1303                                         | 0           | 1 | 0.00 | 0.00 |
| 20q#215702 | 215719 | 20 | 3883288-39160339    | 323052  | AK023614, TOP1                                   | 0           | 1 | 0.00 | 0.00 |
| 20q#215783 | 215791 | 20 | 39842303-40018703   | 176401  |                                                  | 0           | 1 | 0.00 | 0.00 |
| 20q#215792 | 215809 | 20 | 40052114-40230962   | 178849  | PTPRT                                            | 0           | 1 | 0.00 | 0.00 |
| 20q#216225 | 216240 | 20 | 43904867-43988283   | 63417   | 1, ACO78, ZSWIM3, ZSWIM1, C20orf165, NEURL2, PPO | 0           | 1 | 0.00 | 0.00 |
| 20q#216262 | 216265 | 20 | 44089184-44110631   | 21448   | SLC12A5                                          | 0           | 1 | 0.00 | 0.00 |
| 17q#196469 | 196482 | 17 | 35849697-35932268   | 82572   | IGFBP4, TNS4, CR597260                           | Inf         | 1 | 0.02 | 0.00 |

|                   |    |                     |         |                                                   |     |   |      |      |
|-------------------|----|---------------------|---------|---------------------------------------------------|-----|---|------|------|
| 17q#196494_196516 | 17 | 36037936-36178699   | 140764  | RCE1, AK092967, KA21, AL110162, KRT24, KRT25A, KF | Inf | 1 | 0.02 | 0.00 |
| 17q#196517_196519 | 17 | 36181404-36191069   | 9666    | KRT25B, KRT25C                                    | Inf | 1 | 0.02 | 0.00 |
| 17q#197297_197300 | 17 | 42975134-43019604   | 44471   | NPEPPS                                            | 0   | 1 | 0.00 | 0.00 |
| 14q#177926_177937 | 14 | 106268973-106349815 | 80843   | AF184765, AY393068, AK129787, LOC90925            | 0   | 1 | 0.00 | 0.00 |
| 7q#99082_99125    | 7  | 63465352-63909066   | 443715  | 88, ZNF138, AK097702, AK090648, ZNF273, AF075025, | 0   | 1 | 0.00 | 0.00 |
| 7q#103007_103012  | 7  | 109118750-109283514 | 164765  |                                                   | 0   | 1 | 0.00 | 0.00 |
| 7q#103043_103118  | 7  | 109997612-110650879 | 653268  | IMMP2L                                            | 0   | 1 | 0.00 | 0.00 |
| 7q#103167_103176  | 7  | 111159055-111232491 | 73437   | DOCK4                                             | 0   | 1 | 0.00 | 0.00 |
| 6q#87216_87220    | 6  | 76344752-76390348   | 45597   | SENP6                                             | 0   | 1 | 0.00 | 0.00 |
| 7p#98399_98413    | 7  | 48265251-48381778   | 116528  | ABCA13                                            | Inf | 1 | 0.02 | 0.00 |
| 7p#98414_98429    | 7  | 48392436-48630304   | 237869  | ABCA13, AK096400                                  | 0   | 1 | 0.00 | 0.00 |
| 7p#98833_98843    | 7  | 55349859-55448549   | 98691   | ECOP                                              | 0   | 1 | 0.00 | 0.00 |
| 7p#98870_98875    | 7  | 55775907-55807429   | 31523   | ZNF713, CR590495, MRPS17, GBAS                    | 0   | 1 | 0.00 | 0.00 |
| 7q#99038_99045    | 7  | 62893725-62980638   | 86914   | AX721100                                          | 0   | 1 | 0.00 | 0.00 |
| 18q#202914_202924 | 18 | 29669846-29762880   | 93035   | NOL4                                              | 0   | 1 | 0.00 | 0.00 |
| 7p#98356_98398    | 7  | 47854702-48259731   | 405030  | BC045737, UPP1, ABCA13                            | 0   | 1 | 0.00 | 0.00 |
| 7q#103013_103028  | 7  | 109339362-109781176 | 441815  |                                                   | 0   | 1 | 0.00 | 0.00 |
| 7q#103036_103042  | 7  | 109931398-109985261 | 53864   | IMMP2L                                            | 0   | 1 | 0.00 | 0.00 |
| 18q#206366_206375 | 18 | 75402297-75486904   | 84608   | AL390159                                          | 0   | 1 | 0.00 | 0.00 |
| 7p#98549_98582    | 7  | 50218419-50524412   | 305994  | ZNFN1A1, FIGNL1, DDC, GRB10                       | 0   | 1 | 0.00 | 0.00 |
| 6q#86356_86357    | 6  | 64181502-64205199   | 23698   |                                                   | 0   | 1 | 0.00 | 0.00 |
| 6q#86378_86381    | 6  | 64414436-64452546   | 38111   | PHF3                                              | 0   | 1 | 0.00 | 0.00 |
| 12q#158022_158061 | 12 | 86324032-87049703   | 725672  | C12orf50, C12orf29, CEP290, TMTC3                 | 0   | 1 | 0.00 | 0.00 |
| 18q#206346_206348 | 18 | 75235682-75254655   | 18974   | ATP9B                                             | 0   | 1 | 0.00 | 0.00 |
| 18q#206420_206423 | 18 | 75909064-75936028   | 26965   | BC016878                                          | 0   | 1 | 0.00 | 0.00 |
| 18q#206353_206365 | 18 | 75286857-75395178   | 108322  | NFATC1                                            | 0   | 1 | 0.00 | 0.00 |
| 12q#161715_161736 | 12 | 130045196-130289517 | 244322  | GPR133, AL137487                                  | 0   | 1 | 0.00 | 0.00 |
| 12q#159036_159194 | 12 | 100242802-102100435 | 1857634 | SYCP3, GNPTAB, BC018435, FLJ11259, CCDC53, NUP    | 0   | 1 | 0.00 | 0.00 |
| 7q#101723_101729  | 7  | 96079571-96239478   | 159908  |                                                   | 0   | 1 | 0.00 | 0.00 |
| 7q#101776_101797  | 7  | 97005319-97255503   | 250185  | TAC1, ASNS, BC030024, FLJ39257                    | 0   | 1 | 0.00 | 0.00 |
| 7q#102628_102761  | 7  | 104638545-106114034 | 1475490 | ATXN7L4, CR604543, AK125261, FLJ23834, SYPL1, P   | 0   | 1 | 0.00 | 0.00 |
| 18q#206328_206341 | 18 | 75074982-75191037   | 116056  | ATP9B                                             | 0   | 1 | 0.00 | 0.00 |
| 18q#206424_206426 | 18 | 75945699-75963711   | 18013   |                                                   | 0   | 1 | 0.00 | 0.00 |
| 18q#206349_206350 | 18 | 75259664-75269401   | 9738    | NFATC1                                            | 0   | 1 | 0.00 | 0.00 |
| 18q#206414_206419 | 18 | 75845192-75905054   | 59863   | TXNL4A, C18orf22                                  | 0   | 1 | 0.00 | 0.00 |
| 6q#86358_86377    | 6  | 64228424-64406974   | 178551  | CR749458, PTP4A1, AK055678                        | 0   | 1 | 0.00 | 0.00 |
| 7q#102329_102337  | 7  | 101456508-101541953 | 85446   | CUTL1, APS                                        | 0   | 1 | 0.00 | 0.00 |
| 12q#161697_161700 | 12 | 129885241-129896598 | 11358   | RAN                                               | 0   | 1 | 0.00 | 0.00 |
| 12q#161701_161714 | 12 | 129909160-130034688 | 125529  | GPR133                                            | 0   | 1 | 0.00 | 0.00 |
| 7q#100049_100050  | 7  | 75858669-75885451   | 26783   | BC013192, POMZP3                                  | 0   | 1 | 0.00 | 0.00 |
| 18q#206309_206327 | 18 | 74906481-75066390   | 159910  | ATP9B                                             | 0   | 1 | 0.00 | 0.00 |
| 18q#206427_206428 | 18 | 75971816-75978610   | 6795    | KIAA0863                                          | 0   | 1 | 0.00 | 0.00 |
| 18q#206342_206345 | 18 | 75196415-75221120   | 24706   | ATP9B                                             | 0   | 1 | 0.00 | 0.00 |
| 12q#158988_159035 | 12 | 99724774-100229642  | 504869  | TMEM16D, SLC5A8, UTP20                            | 0   | 1 | 0.00 | 0.00 |
| 6q#86343_86355    | 6  | 64005967-64154563   | 148597  | GLULD1                                            | 0   | 1 | 0.00 | 0.00 |
| 7q#101730_101731  | 7  | 96251202-96258810   | 7609    | AK095619                                          | 0   | 1 | 0.00 | 0.00 |
| 7q#101760_101775  | 7  | 96620312-96997551   | 377240  |                                                   | 0   | 1 | 0.00 | 0.00 |
| 7q#101798_101805  | 7  | 97270772-97394160   | 123389  | LMTK2                                             | 0   | 1 | 0.00 | 0.00 |
| 12q#161909_161924 | 12 | 132012462-132146758 | 134297  | GOLGA3, CHFR, AK055957, ZNF605                    | 0   | 1 | 0.00 | 0.00 |
| 7q#102231_102236  | 7  | 100520663-10053087  | 32425   | RABL5                                             | 0   | 1 | 0.00 | 0.00 |
| 7q#102261_102277  | 7  | 100755335-100881358 | 126024  | EMID2, BC085006, AF131787, MYLC2PL                | 0   | 1 | 0.00 | 0.00 |
| 7q#102279_102286  | 7  | 100966221-101065488 | 99268   | CUTL1                                             | 0   | 1 | 0.00 | 0.00 |
| 7q#102304_102328  | 7  | 101221477-101446023 | 224547  | CUTL1                                             | 0   | 1 | 0.00 | 0.00 |
| 12q#161906_161908 | 12 | 131991342-132005906 | 14565   | GOLGA3                                            | 0   | 1 | 0.00 | 0.00 |
| 12q#161647_161696 | 12 | 129421901-129882658 | 460758  | RIMBP2, BC007632, STX2, RAN                       | 0   | 1 | 0.00 | 0.00 |

|                   |    |                     |         |                                                    |             |   |      |      |
|-------------------|----|---------------------|---------|----------------------------------------------------|-------------|---|------|------|
| 18q#206195_206308 | 18 | 73389512-74892060   | 1502549 | BC016792, SALL3                                    | 0           | 1 | 0.00 | 0.00 |
| 7q#102287_102303  | 7  | 101075157-101211091 | 135935  | CUTL1                                              | 0           | 1 | 0.00 | 0.00 |
| 12q#157845_157861 | 12 | 83886239-84084206   | 197968  | AK126325, LRRIQ1                                   | 0           | 1 | 0.00 | 0.00 |
| 12q#157922_157952 | 12 | 84987961-85219315   | 231355  | MGAT4C                                             | 0           | 1 | 0.00 | 0.00 |
| 12q#158750_158752 | 12 | 97444675-97474797   | 30123   | TMPO                                               | 0           | 1 | 0.00 | 0.00 |
| 12q#158753_158843 | 12 | 97483340-98298053   | 814714  | BC033976, SLC25A3, IKIP, APAF1, ANKS1B             | 0           | 1 | 0.00 | 0.00 |
| 12q#158943_158987 | 12 | 99222492-99714225   | 491734  | SCYL2, SLC17A8, NR1H4, GAS2L3, TMEM16D             | 0           | 1 | 0.00 | 0.00 |
| 12q#161409_161646 | 12 | 126534185-129415659 | 2881475 | AK126715, SLC15A4, GLT1D1, TMEM132D, AK127723,     | 0           | 1 | 0.00 | 0.00 |
| 12q#161883_161905 | 12 | 131822849-131985458 | 162610  | P2, PGAM5, AK097688, BC047906, AB014592, BC0431,   | 0           | 1 | 0.00 | 0.00 |
| 3q#53674_53675    | 3  | 196914968-196921624 | 6657    | LOC440993                                          | 0           | 1 | 0.00 | 0.00 |
| 3q#53676_53678    | 3  | 196928253-196937286 | 9034    | LOC440993, AK126698                                | 0           | 1 | 0.00 | 0.00 |
| 3q#53679_53680    | 3  | 196946071-196947349 | 1279    | MUC20                                              | 0           | 1 | 0.00 | 0.00 |
| 17q#195563_195580 | 17 | 26890725-26966099   | 75375   | AK024534                                           | 0           | 1 | 0.00 | 0.00 |
| 17q#195551_195562 | 17 | 26792495-26886260   | 93766   | RAB11FIP4                                          | 0           | 1 | 0.00 | 0.00 |
| 17q#195581_195589 | 17 | 26979611-27073689   | 94079   |                                                    | 0           | 1 | 0.00 | 0.00 |
| 17q#195428_195448 | 17 | 25658976-25782929   | 123954  | TMIGD, CPD                                         | 1.398928118 | 1 | 0.03 | 0.02 |
| 17q#195453_195470 | 17 | 25829456-26073671   | 244216  | R1, DKFZP4340047, BC042455, DKFZp667M2411, CR6     | Inf         | 1 | 0.02 | 0.00 |
| 16p#186018_186028 | 16 | 28087-70409         | 42323   | AF060223, POLR3K, C16orf33, RHBDF1, MPG            | Inf         | 1 | 0.02 | 0.00 |
| 17q#195644_195669 | 17 | 27702851-27891076   | 188226  | NF207, AB209215, BC037534, PSMD11, CDK5R1, MYO     | 0           | 1 | 0.00 | 0.00 |
| 17q#195761_195774 | 17 | 28727829-28836625   | 108797  | ACCN1                                              | 0           | 1 | 0.00 | 0.00 |
| 17q#195632_195643 | 17 | 27602275-27692677   | 90403   | RHBDL3, C17orf75                                   | 0           | 1 | 0.00 | 0.00 |
| 17q#195722_195725 | 17 | 28389326-28416884   | 27559   | ACCN1                                              | 0           | 1 | 0.00 | 0.00 |
| 17q#195732_195738 | 17 | 28478468-28526774   | 48307   | ACCN1                                              | 0           | 1 | 0.00 | 0.00 |
| 17q#195348_195351 | 17 | 24950777-24965392   | 14616   | ANKRD13B                                           | 1.044194198 | 1 | 0.05 | 0.05 |
| 17q#195419_195421 | 17 | 25561932-25577065   | 15134   | SLC6A4                                             | 1.044194198 | 1 | 0.05 | 0.05 |
| 17q#195739_195760 | 17 | 28536129-28718848   | 182720  | ACCN1                                              | 0           | 1 | 0.00 | 0.00 |
| 17q#195775_195777 | 17 | 28843611-28863681   | 20071   | ACCN1                                              | 0           | 1 | 0.00 | 0.00 |
| 17q#195422_195426 | 17 | 25595151-25638045   | 42895   | BLMH                                               | 0.686886232 | 1 | 0.03 | 0.05 |
| 17q#195778_195788 | 17 | 28869733-28960131   | 90399   | ACCN1                                              | 0           | 1 | 0.00 | 0.00 |
| 17q#197202_197209 | 17 | 41587723-41706929   | 119207  | KIAA1267, BC098376                                 | 0           | 1 | 0.00 | 0.00 |
| 16p#186684_186696 | 16 | 4594255-4675218     | 80964   | AK128595, FAM100A, MGRN1                           | 1.398928118 | 1 | 0.03 | 0.02 |
| 17q#200381_200387 | 17 | 76709472-76739432   | 29961   | AK131529                                           | Inf         | 1 | 0.02 | 0.00 |
| 20q#215357_215397 | 20 | 34396787-34734091   | 337305  | 24674, BC039668, MYL9, TGIF2, CR618600, C20orf24,  | 0           | 1 | 0.00 | 0.00 |
| 20q#215450_215461 | 20 | 35202957-35308761   | 105805  | C20orf132, RPN2                                    | 0           | 1 | 0.00 | 0.00 |
| 20q#215223_215228 | 20 | 33298033-33319805   | 21773   | MMP24                                              | 0           | 1 | 0.00 | 0.00 |
| 17q#200377_200380 | 17 | 76688709-76705147   | 16439   | BAIAP2                                             | Inf         | 1 | 0.02 | 0.00 |
| 17q#200437_200451 | 17 | 77131670-77242553   | 110884  | NPLOC4, TSPAN10, PDE6G, AF338198, LOC339229        | Inf         | 1 | 0.02 | 0.00 |
| 17q#200620_200626 | 17 | 78586237-78653589   | 67353   | B3GNTL1, METRNL                                    | 0           | 1 | 0.00 | 0.00 |
| 20q#215218_215222 | 20 | 33266206-33289224   | 23019   | MMP24                                              | 0           | 1 | 0.00 | 0.00 |
| 20q#215229_215271 | 20 | 33328121-33656391   | 328271  | C, C20orf44, GDF5, BC032495, CEP250, C20orf173, ER | 0           | 1 | 0.00 | 0.00 |
| 20q#215272_215298 | 20 | 33661345-33852870   | 191526  | SPAG4, CPNE1, NFS1, C20orf52, RNPC2, PHF20         | 0           | 1 | 0.00 | 0.00 |
| 20q#215299_215354 | 20 | 33862183-34360149   | 497967  | ND1, C20orf152, BC013885, EPB41L1, C20orf4, CR590  | 0           | 1 | 0.00 | 0.00 |
| 20q#215355_215356 | 20 | 34380500-34389404   | 8905    | DLGAP4                                             | 0           | 1 | 0.00 | 0.00 |
| 20q#215559_215566 | 20 | 36305063-36367796   | 62734   | KIAA1755, AK055854, BPI                            | 0           | 1 | 0.00 | 0.00 |
| 17q#199003_199009 | 17 | 61733108-61785795   | 52688   | PRKCA                                              | 0.686886232 | 1 | 0.03 | 0.05 |
| 17q#197968_197975 | 17 | 50788052-50853052   | 65001   | MMD                                                | 0.692294348 | 1 | 0.02 | 0.02 |
| 17q#196733_196754 | 17 | 37693093-37865498   | 172406  | STAT5A, STAT3, PTRF, ATP6V0A1                      | 0           | 1 | 0.00 | 0.00 |
| 6q#86503_86507    | 6  | 66761677-66895836   | 134160  | CASP8AP2, CX62, BACH2, CR625825                    | 0           | 1 | 0.00 | 0.00 |
| 6q#88164_88217    | 6  | 90599884-91127421   | 527538  |                                                    | 0           | 1 | 0.00 | 0.00 |
| 6q#86501_86502    | 6  | 66709938-66736041   | 26104   |                                                    | 0           | 1 | 0.00 | 0.00 |
| 8p#109919_109923  | 8  | 29246682-29275592   | 28911   | BC012900, DUSP4                                    | 0           | 1 | 0.00 | 0.00 |
| 8p#108476_108502  | 8  | 29685204-29839616   | 154413  | BC082237, AK054638                                 | 0           | 1 | 0.00 | 0.00 |
| 8p#108510_108515  | 8  | 11678860-11903960   | 225101  | NEIL2, AK057726, FDF1, CTSB, DEFB136, BC032892     | 0           | 1 | 0.00 | 0.00 |
| 6q#90631_90640    | 6  | 12602139-12644996   | 42858   | LONRF1                                             | 0           | 1 | 0.00 | 0.00 |
|                   |    | 127829086-127914609 | 85524   | KIAA0408, C6orf174                                 | 0           | 1 | 0.00 | 0.00 |

|                   |    |                     |         |                                                   |     |   |      |      |
|-------------------|----|---------------------|---------|---------------------------------------------------|-----|---|------|------|
| 8p#109949_109968  | 8  | 29862892-30110051   | 247160  | BC028745, TMEEM66, LEPROTL1, CR620833             | 0   | 1 | 0.00 | 0.00 |
| 8p#108358_108361  | 8  | 10649592-10660133   | 10542   | BC043573, PINX1                                   | 0   | 1 | 0.00 | 0.00 |
| 8p#108759_108772  | 8  | 16070654-16315189   | 244536  | MSR1                                              | 0   | 1 | 0.00 | 0.00 |
| 8p#109122_109155  | 8  | 20512562-21490610   | 978049  | AK058067                                          | 0   | 1 | 0.00 | 0.00 |
| 8p#107712_107719  | 8  | 2229727-2348636     | 118910  |                                                   | 0   | 1 | 0.00 | 0.00 |
| 6q#86493_86500    | 6  | 66592793-66695588   | 102796  |                                                   | 0   | 1 | 0.00 | 0.00 |
| 6q#92320_92327    | 6  | 148887972-148979139 | 91168   | SASH1                                             | 0   | 1 | 0.00 | 0.00 |
| 6q#90641_90727    | 6  | 127929111-128755039 | 825929  | C6orf58, C6orf190, PTPRK                          | 0   | 1 | 0.00 | 0.00 |
| 6q#91058_91087    | 6  | 132795693-132992709 | 197017  | STX7, TAAR9, TAAR8, TAAR6, TAAR5, TAAR2           | 0   | 1 | 0.00 | 0.00 |
| 6q#86957_86959    | 6  | 73465803-73480278   | 14476   | KCNQ5                                             | Inf | 1 | 0.02 | 0.00 |
| 18p#201852_201856 | 18 | 13656231-13698919   | 42689   | C18orf19                                          | 0   | 1 | 0.00 | 0.00 |
| 6q#86989_87003    | 6  | 73734089-73840243   | 106155  | KCNQ5                                             | Inf | 1 | 0.02 | 0.00 |
| 8p#108552_108565  | 8  | 13068616-13182936   | 114321  | DLC1                                              | 0   | 1 | 0.00 | 0.00 |
| 8p#108751_108758  | 8  | 15996382-16059825   | 63444   | MSR1                                              | 0   | 1 | 0.00 | 0.00 |
| 8p#109095_109121  | 8  | 20082933-20470542   | 387610  | SLC18A1, ATP6V1B2, LZTS1, BC038538                | 0   | 1 | 0.00 | 0.00 |
| 8p#109173_109185  | 8  | 21826992-21919661   | 92670   | DOK2, XPO7, AB018288                              | 0   | 1 | 0.00 | 0.00 |
| 8p#108033_108044  | 8  | 6148838-6307170     | 158333  | BC056195, MCPH1                                   | 0   | 1 | 0.00 | 0.00 |
| 8p#108342_108348  | 8  | 10501314-10559464   | 58151   | RP1L1, AK127545                                   | 0   | 1 | 0.00 | 0.00 |
| 8p#108362_108372  | 8  | 10670975-10735606   | 64632   | PINX1                                             | 0   | 1 | 0.00 | 0.00 |
| 8p#108399_108422  | 8  | 10997906-11178657   | 180752  | XKR6, AJ301561, AJ291676                          | 0   | 1 | 0.00 | 0.00 |
| 8p#108773_108810  | 8  | 16373516-16986781   | 613266  | AK128886, FGF20, EFHA2                            | 0   | 1 | 0.00 | 0.00 |
| 6q#86444_86470    | 6  | 66034459-66298599   | 264141  | EGFL1                                             | Inf | 1 | 0.02 | 0.00 |
| 6q#92328_92369    | 6  | 149000316-149449087 | 448772  | UST                                               | 0   | 1 | 0.00 | 0.00 |
| 6q#86858_86872    | 6  | 72210264-72442727   | 232464  | BC110999, BC038189                                | Inf | 1 | 0.02 | 0.00 |
| 6q#86901_86932    | 6  | 72858806-73135665   | 276860  | RIMS1                                             | Inf | 1 | 0.02 | 0.00 |
| 18p#201857_201874 | 18 | 13705800-13847158   | 141359  | C18orf19, RNMT, MC5R                              | 0   | 1 | 0.00 | 0.00 |
| 6q#86971_86988    | 6  | 73577411-73724157   | 146747  | KCNQ5                                             | Inf | 1 | 0.02 | 0.00 |
| 18p#201805_201812 | 18 | 13243663-13299658   | 55996   | C18orf1                                           | Inf | 1 | 0.02 | 0.00 |
| 18p#201813_201851 | 18 | 13307423-13642243   | 334821  | C18orf1                                           | Inf | 1 | 0.00 | 0.00 |
| 18q#203786_203796 | 18 | 42006417-42092272   | 85856   | C18orf25                                          | 0   | 1 | 0.00 | 0.00 |
| 8p#109007_109094  | 8  | 18983405-20075245   | 1091841 | #2D4A, ChGn, INTS10, M26380, LPL, CR604792, SLC18 | 0   | 1 | 0.00 | 0.00 |
| 8p#109157_109172  | 8  | 21579106-21822369   | 243264  | GFRA2, DOK2                                       | 0   | 1 | 0.00 | 0.00 |
| 8p#108335_108341  | 8  | 10428033-10493312   | 65280   | UNQ9391, BC033497                                 | 0   | 1 | 0.00 | 0.00 |
| 8p#108373_108398  | 8  | 10741416-10992351   | 250936  | XKR6                                              | 0   | 1 | 0.00 | 0.00 |
| 8p#108566_108677  | 8  | 13188042-14659611   | 1471570 | DLC1, C8orf48, SGCZ                               | 0   | 1 | 0.00 | 0.00 |
| 6q#87004_87009    | 6  | 73854396-73899489   | 45094   | KCNQ5                                             | 0   | 1 | 0.00 | 0.00 |
| 8p#108811_108812  | 8  | 16998505-17007393   | 8889    | EFHA2                                             | 0   | 1 | 0.00 | 0.00 |
| 8p#108820_108827  | 8  | 17073072-17123692   | 50621   | ZDHHC2                                            | 0   | 1 | 0.00 | 0.00 |
| 7q#101145_101198  | 7  | 90102299-90613372   | 511074  | PFTK1, FZD1                                       | 0   | 1 | 0.00 | 0.00 |
| 6q#87025_87049    | 6  | 74046387-74267523   | 221137  | BC035766, BC024931, DDX43, C6orf150, MTO1         | 0   | 1 | 0.00 | 0.00 |
| 6q#87059_87065    | 6  | 74366764-74420787   | 54024   | SLC17A5, AF244577                                 | 0   | 1 | 0.00 | 0.00 |
| 6q#86429_86443    | 6  | 65647702-66003945   | 356244  |                                                   | Inf | 1 | 0.02 | 0.00 |
| 6q#86471_86472    | 6  | 66306426-66315333   | 8908    | EGFL1                                             | Inf | 1 | 0.02 | 0.00 |
| 8p#108316_108334  | 8  | 10249514-10420881   | 171368  | MSRA, AK123327, AK054782, AK124536, UNQ9391       | 0   | 1 | 0.00 | 0.00 |
| 6q#86401_86404    | 6  | 64926452-65034301   | 107850  |                                                   | Inf | 1 | 0.02 | 0.00 |
| 6q#86488_86491    | 6  | 66545290-66567772   | 22483   |                                                   | 0   | 1 | 0.00 | 0.00 |
| 18q#203766_203785 | 18 | 41853397-41992871   | 139475  | PSTPIP2, ATP5A1, CCDC5                            | 0   | 1 | 0.00 | 0.00 |
| 18q#203797_203871 | 18 | 42100323-42794639   | 694317  | C012190, RNF165, BX647229, LOXHD1, ST8SIA5, PIAS  | 0   | 1 | 0.00 | 0.00 |
| 18q#203984_204002 | 18 | 44294570-44448005   | 153436  | KIAA0427                                          | 0   | 1 | 0.00 | 0.00 |
| 8p#108273_108276  | 8  | 9794829-9808074     | 13246   |                                                   | 0   | 1 | 0.00 | 0.00 |
| 8p#108278_108314  | 8  | 9819192-10228088    | 408897  | BC040270, MSRA                                    | 0   | 1 | 0.00 | 0.00 |
| 8p#108813_108819  | 8  | 17018353-17067472   | 49120   | EFHA2, AK123312, ZDHHC2                           | 0   | 1 | 0.00 | 0.00 |
| 6q#87010_87019    | 6  | 73906544-73990828   | 84285   | KCNQ5, C6orf148                                   | 0   | 1 | 0.00 | 0.00 |
| 6q#87050_87058    | 6  | 74275613-74355263   | 79651   | EEF1A1                                            | 0   | 1 | 0.00 | 0.00 |
| 6q#86320_86329    | 6  | 63230960-63574834   | 343875  |                                                   | Inf | 1 | 0.02 | 0.00 |

|                   |    |                     |         |                                                  |     |   |      |      |
|-------------------|----|---------------------|---------|--------------------------------------------------|-----|---|------|------|
| 18q#203872_203899 | 18 | 42794592-43024789   | 230198  | KATNAL2, HDHD2, IER3IP1, FUSSEL18                | 0   | 1 | 0.00 | 0.00 |
| 18q#203949_203983 | 18 | 43722034-44285725   | 563692  | ZBTB7C, AB027121                                 | 0   | 1 | 0.00 | 0.00 |
| 6q#86397_86400    | 6  | 64787807-64882387   | 94581   |                                                  | Inf | 1 | 0.02 | 0.00 |
| 6q#86405_86428    | 6  | 65075925-65630675   | 554751  |                                                  | Inf | 1 | 0.02 | 0.00 |
| 6q#86473_86475    | 6  | 66326140-66347023   | 20884   | EGFL11, BX537914                                 | 0   | 1 | 0.00 | 0.00 |
| 6q#86480_86487    | 6  | 66400762-66534202   | 133441  | BX537914                                         | 0   | 1 | 0.00 | 0.00 |
| 6q#87020_87024    | 6  | 74001013-74038037   | 37025   | C6orf148, BC035766                               | 0   | 1 | 0.00 | 0.00 |
| 18q#203900_203948 | 18 | 43034290-43714707   | 680418  | BC040860, AK126373, SMAD2                        | 0   | 1 | 0.00 | 0.00 |
| 6q#86476_86479    | 6  | 66353041-66381971   | 28931   | BX537914                                         | 0   | 1 | 0.00 | 0.00 |
| 2p#23840_24083    | 2  | 56257099-60745949   | 4488851 | B067499, BC036434, VRK2, FANCL, AK055400, AK056  | 0   | 1 | 0.00 | 0.00 |
| 2p#24093_24104    | 2  | 60926294-61047841   | 121548  | PAPOLG, AK122786, REL                            | 0   | 1 | 0.00 | 0.00 |
| 2p#24225_24357    | 2  | 62169941-63631739   | 1461799 | T2, TMEM17, AK124081, BC038779, EHBPI, OTX1, AF2 | 0   | 1 | 0.00 | 0.00 |
| 4q#66720_66725    | 4  | 183614388-183650791 | 36404   | AF195420                                         | 0   | 1 | 0.00 | 0.00 |
| 6p#86230_86231    | 6  | 58415224-58444270   | 29047   |                                                  | 0   | 1 | 0.00 | 0.00 |
| 7q#101535_101569  | 7  | 94183854-94496618   | 312765  | PPP1R9A                                          | 0   | 1 | 0.00 | 0.00 |
| 7q#100683_100718  | 7  | 83913158-84422394   | 509237  | SEMA3D, AY358937                                 | 0   | 1 | 0.00 | 0.00 |
| 4q#63873_63900    | 4  | 142656232-143203535 | 547304  | IL15                                             | 0   | 1 | 0.00 | 0.00 |
| 21q#220761_220990 | 21 | 43470240-44844797   | 1374558 | PDXK, CSTB, D21S2056E, BC034348, AK128598, AGPA  | 0   | 1 | 0.00 | 0.00 |
| 6p#86055_86102    | 6  | 56082068-56623951   | 541884  | COL21A1, AF330693, DST                           | 0   | 1 | 0.00 | 0.00 |
| 6p#86130_86167    | 6  | 56912335-57238341   | 326007  | U31851, C6orf65, KIAA1586, ZNF451, BAG2, RAB23   | 0   | 1 | 0.00 | 0.00 |
| 6p#86211_86224    | 6  | 57683389-58163017   | 479629  |                                                  | 0   | 1 | 0.00 | 0.00 |
| 6p#86232_86241    | 6  | 58476527-58788747   | 312221  |                                                  | 0   | 1 | 0.00 | 0.00 |
| 2p#23470_23839    | 2  | 51212928-56243747   | 5030820 | 7078, AK124553, FLJ42562, RTN4, AK056000, FLJ314 | 0   | 1 | 0.00 | 0.00 |
| 2p#24105_24224    | 2  | 61061211-62163447   | 1102237 | 71, AK075484, AHS2, USP34, AB011142, XPO1, AK09  | 0   | 1 | 0.00 | 0.00 |
| 2p#25682_25721    | 2  | 79092494-79514662   | 422169  | REG3G, REG1B, REG1A, AK126561, REG3A, AK12722    | 0   | 1 | 0.00 | 0.00 |
| 7q#100674_100682  | 7  | 83696868-83894860   | 197993  | BX647900                                         | 0   | 1 | 0.00 | 0.00 |
| 4q#63595_63623    | 4  | 139492171-140213709 | 721539  | SLC7A11                                          | 0   | 1 | 0.00 | 0.00 |
| 4q#63849_63872    | 4  | 142375582-142632566 | 256985  | RNF150, AK130520, ZNF330                         | 0   | 1 | 0.00 | 0.00 |
| 2p#21996_22047    | 2  | 33275047-33728546   | 453500  | LTBP1, RASGRP3, FAM98A                           | 0   | 1 | 0.00 | 0.00 |
| 2p#22623_22682    | 2  | 42093418-42630712   | 537295  | BC047907, LOC91461, EML4, COX7A2L, KCNG3         | 0   | 1 | 0.00 | 0.00 |
| 2p#22683_22725    | 2  | 42636708-43186798   | 550091  | AK128743, MTA3, AK127245, OXER1, HAAO, CR60070   | 0   | 1 | 0.00 | 0.00 |
| 2p#22839_23117    | 2  | 44340398-47157869   | 2817472 | 55, SRBD1, PRKCE, EPAS1, ATP6V1E2, CR622607, R   | 0   | 1 | 0.00 | 0.00 |
| 2p#23118_23123    | 2  | 47164743-47206153   | 41411   | TTC7A                                            | 0   | 1 | 0.00 | 0.00 |
| 2p#23124_23432    | 2  | 47213377-50885914   | 3672538 | 2860, KCNK12, AK223284, MSH6, FBXO11, BC007278,  | 0   | 1 | 0.00 | 0.00 |
| 2p#23433_23452    | 2  | 50893764-51048781   | 155018  | NRXN1                                            | 0   | 1 | 0.00 | 0.00 |
| 2p#23453_23469    | 2  | 51054500-51202674   | 148175  | NRXN1, AK127244                                  | 0   | 1 | 0.00 | 0.00 |
| 2p#25722_25882    | 2  | 79524999-80985364   | 1460366 | AK127226, CTNNA2                                 | 0   | 1 | 0.00 | 0.00 |
| 2q#33160_33203    | 2  | 185775256-186717764 | 942509  | BC039382, FSIP2, CR936597, FLJ44048              | 0   | 1 | 0.00 | 0.00 |
| 4q#63624_63640    | 4  | 140227532-140420668 | 193137  | CCRN4L, ELF2, CR620999                           | 0   | 1 | 0.00 | 0.00 |
| 4q#63641_63658    | 4  | 140439190-140619789 | 180600  | CR620999, OSAP, NDUFC1, BC107682, NARG1          | 0   | 1 | 0.00 | 0.00 |
| 4q#63659_63802    | 4  | 140629951-141949047 | 1319097 | B, SETD7, MGST2, MAML3, SCOC, CLGN, LOC152586    | 0   | 1 | 0.00 | 0.00 |
| 6p#85792_85798    | 6  | 52814272-52855628   | 41357   | GSTA5, AK056855                                  | 0   | 1 | 0.00 | 0.00 |
| 21q#220991_221042 | 21 | 44848147-45131658   | 283512  | 221orf29, AK127406, UBE2G2, SUMO3, PTTG1IP, ITGB | 0   | 1 | 0.00 | 0.00 |
| 20q#215462_215482 | 20 | 35316053-35499961   | 183909  | GHRH, MANBAL, SRC                                | 0   | 1 | 0.00 | 0.00 |
| 17q#200463_200467 | 17 | 77303484-77405263   | 101780  | AF338198, DYSFIP1, P4HB                          | 0   | 1 | 0.00 | 0.00 |
| 17q#200452_200462 | 17 | 77248628-77296853   | 48226   | AF338198, HGS, MRPL12, SLC25A10                  | 0   | 1 | 0.00 | 0.00 |
| 17q#200368_200375 | 17 | 76619712-76669012   | 49301   | FLJ90757, BAIAP2                                 | 0   | 1 | 0.00 | 0.00 |
| 17q#200599_200604 | 17 | 78399855-78444496   | 44642   | TBCD                                             | 0   | 1 | 0.00 | 0.00 |
| 20q#215547_215558 | 20 | 36202094-36295238   | 93145   | TGM2, KIAA1755                                   | 0   | 1 | 0.00 | 0.00 |
| 20q#215567_215583 | 20 | 36374658-36493874   | 119217  | BPI, LBP, AK090932, BX640887                     | 0   | 1 | 0.00 | 0.00 |
| 20q#217733_217742 | 20 | 61446244-61522234   | 75991   | CHRNA4, AB209359, Y15065, KCNQ2                  | Inf | 1 | 0.02 | 0.00 |
| 20q#217837_217855 | 20 | 62156028-62250968   | 94941   | TCEA2, RGS19, OPRL1                              | 0   | 1 | 0.00 | 0.00 |
| 20q#215620_215656 | 20 | 36840898-37379013   | 538116  | PPP1R16B, FAM83D, DHX35, BC043524                | 0   | 1 | 0.00 | 0.00 |
| 20q#215658_215676 | 20 | 37488367-38089627   | 581261  |                                                  | 0   | 1 | 0.00 | 0.00 |
| 20q#215677_215689 | 20 | 38116418-38491467   | 375050  |                                                  | 0   | 1 | 0.00 | 0.00 |

|                   |    |                     |         |                                                    |             |   |   |      |      |
|-------------------|----|---------------------|---------|----------------------------------------------------|-------------|---|---|------|------|
| 20q#215694_215701 | 20 | 38728858-38809768   | 80911   | MAFB                                               |             | 0 | 1 | 0.00 | 0.00 |
| 20q#215720_215740 | 20 | 39175954-39369651   | 193698  | TOP1, BC035080, PLOG1, ZHX3, AB007855              |             | 0 | 1 | 0.00 | 0.00 |
| 20q#215748_215782 | 20 | 39431796-39785060   | 353265  | AK124874, CHD6                                     |             | 0 | 1 | 0.00 | 0.00 |
| 20q#216241_216243 | 20 | 43972883-43983014   | 10132   | PLTP                                               |             | 0 | 1 | 0.00 | 0.00 |
| 20q#216244_216261 | 20 | 43989006-44078612   | 89607   | FLJ40606, C20orf67, ZNF335, MMP9                   |             | 0 | 1 | 0.00 | 0.00 |
| 20q#217642_217647 | 20 | 60845536-60883035   | 37500   | NTSR1, AK092644                                    |             | 0 | 1 | 0.00 | 0.00 |
| 20q#217529_217530 | 20 | 59912030-59919730   | 7701    | CDH4                                               | 0.692294348 |   | 1 | 0.02 | 0.02 |
| 20q#217541_217543 | 20 | 60039825-60059059   | 19235   | TAF4                                               | 0.692294348 |   | 1 | 0.02 | 0.02 |
| 20q#217631_217641 | 20 | 60760865-60837804   | 76940   | SLCO4A1, CR616855, NTSR1                           | 0           |   | 1 | 0.00 | 0.00 |
| 20q#217648_217676 | 20 | 60888983-61050126   | 161144  | C20orf20, OGFR, COL9A3, TCFL5, DIDO1, C20orf11     | 0           |   | 1 | 0.00 | 0.00 |
| 20q#217716_217722 | 20 | 61328622-61367207   | 38586   | BIRC7, C20orf58, G43498                            | 0           |   | 1 | 0.00 | 0.00 |
| 18q#202809_202816 | 18 | 28467152-28549920   | 82769   | KLHL14                                             | 0           |   | 1 | 0.00 | 0.00 |
| 14q#172178_172186 | 14 | 49028644-49116280   | 87637   | AK055143, RPS29                                    | 0           |   | 1 | 0.00 | 0.00 |
| 7q#99362_99372    | 7  | 67292740-67639037   | 346298  |                                                    | 0           |   | 1 | 0.00 | 0.00 |
| 18q#202757_202808 | 18 | 27899909-28446564   | 546656  | RNF125, RNF138, MEP1B, FAM59A                      | 0           |   | 1 | 0.00 | 0.00 |
| 12q#156218_156269 | 12 | 61457051-62377603   | 920553  | AB032983, AK023315, AVPR1A, DPY19L2                | Inf         |   | 1 | 0.02 | 0.00 |
| 7p#98315_98331    | 7  | 47436535-47649041   | 212507  | AK056440, AF076844, PKD1L1                         | 0           |   | 1 | 0.00 | 0.00 |
| 14q#172123_172135 | 14 | 47378183-47724376   | 346194  |                                                    | 0           |   | 1 | 0.00 | 0.00 |
| 14q#172171_172177 | 14 | 48847087-49004794   | 157708  |                                                    | 0           |   | 1 | 0.00 | 0.00 |
| 7p#97741_97764    | 7  | 40225102-40431343   | 206242  | C7orf10                                            | 0           |   | 1 | 0.00 | 0.00 |
| 7p#97765_97782    | 7  | 40441189-40598208   | 157020  | C7orf10                                            | Inf         |   | 1 | 0.02 | 0.00 |
| 7q#99357_99361    | 7  | 67154330-67261780   | 107451  |                                                    | 0           |   | 1 | 0.00 | 0.00 |
| 14q#172773_172791 | 14 | 54614636-54711907   | 97272   | LGALS3, DLG7                                       | 0           |   | 1 | 0.00 | 0.00 |
| 7p#97783_97876    | 7  | 40610203-42215142   | 1604940 | C7orf10, BX647937, BC033981, INHBA, BC037931, GLI3 | 0           |   | 1 | 0.00 | 0.00 |
| 14q#171652_171678 | 14 | 39331807-39910617   | 578811  |                                                    | 0           |   | 1 | 0.00 | 0.00 |
| 14q#171686_171784 | 14 | 40010378-42042603   | 2032226 | BX248273, LRFN5, BC043513                          | 0           |   | 1 | 0.00 | 0.00 |
| 7q#100004_100013  | 7  | 75351497-75498406   | 146910  | BC035989, AK094263                                 | 0           |   | 1 | 0.00 | 0.00 |
| 14q#172146_172148 | 14 | 48034769-48116116   | 81348   |                                                    | 0           |   | 1 | 0.00 | 0.00 |
| 14q#172157_172170 | 14 | 48461919-48825745   | 363827  |                                                    | 0           |   | 1 | 0.00 | 0.00 |
| 7q#104480_104488  | 7  | 128040042-128093021 | 52980   | NAG6, FLNC                                         | 0           |   | 1 | 0.00 | 0.00 |
| 7q#104517_104521  | 7  | 128315533-128363868 | 48336   |                                                    | 0           |   | 1 | 0.00 | 0.00 |
| 14q#172670_172689 | 14 | 53704713-53964015   | 259303  | GDKN3, CNIH                                        | 0           |   | 1 | 0.00 | 0.00 |
| 7q#101816_101820  | 7  | 97479900-97507776   | 27877   | LMTK2, BX648200, DKFZP434B0335                     | 0           |   | 1 | 0.00 | 0.00 |
| 7q#99253_99301    | 7  | 65423455-65905847   | 482393  | LMTK2, AK127790, RABGEF1, AK093373, FLJ1009        | 0           |   | 1 | 0.00 | 0.00 |
| 7q#99341_99356    | 7  | 66705646-67126128   | 420483  | 66, KCTD7, AK127790, RABGEF1, AK093373, FLJ1009    | 0           |   | 1 | 0.00 | 0.00 |
| 7q#99510_99518    | 7  | 69391039-69462062   | 71024   | AK056289                                           | 0           |   | 1 | 0.00 | 0.00 |
| 12q#157492_157503 | 12 | 78340296-78490693   | 150398  | AUTS2                                              | 0           |   | 1 | 0.00 | 0.00 |
| 12q#161768_161779 | 12 | 130801317-130911411 | 110095  | SYT1, PAWR                                         | Inf         |   | 1 | 0.02 | 0.00 |
| 7q#99955_100003   | 7  | 74978130-75340478   | 362349  | SFRS8                                              | 0           |   | 1 | 0.00 | 0.00 |
| 7q#106952_106956  | 7  | 153202314-153297512 | 95199   | 002581, CCL26, CCL24, RHBD2, POR, TMPIT, STYX1     | 0           |   | 1 | 0.00 | 0.00 |
| 7q#104522_104542  | 7  | 128371739-128544017 | 172279  | DPP6                                               | 0           |   | 1 | 0.00 | 0.00 |
| 7q#101806_101810  | 7  | 97402540-97434037   | 31498   | TSPAN33, SMO, KIAA0828                             | 0           |   | 1 | 0.00 | 0.00 |
| 7q#101811_101815  | 7  | 97443935-97471050   | 27116   | LMTK2                                              | 0           |   | 1 | 0.00 | 0.00 |
| 7q#102058_102068  | 7  | 99398162-99453217   | 55056   | LMTK2                                              | 0           |   | 1 | 0.00 | 0.00 |
| 7q#102094_102150  | 7  | 99676327-99969625   | 293299  | FLJ10925, GAL3ST4, GPC2, STAG3                     | 0           |   | 1 | 0.00 | 0.00 |
| 7q#106875_106878  | 7  | 151623614-151743961 | 120348  | FLJ37538, HRBL, LRCH4, FBXO24, PCOLCE, CR606927    | 0           |   | 1 | 0.00 | 0.00 |
| 7q#107303_107312  | 7  | 156808930-156859202 | 50273   |                                                    | 0           |   | 1 | 0.00 | 0.00 |
| 7q#101821_101822  | 7  | 97515561-97525420   | 9860    | AK098637, PTPRN2                                   | 0           |   | 1 | 0.00 | 0.00 |
| 7q#99490_99496    | 7  | 69238175-69288332   | 50158   | DKFZP434B0335                                      | 0           |   | 1 | 0.00 | 0.00 |
| 7q#99498_99505    | 7  | 69304172-69355522   | 51351   | AUTS2                                              | 0           |   | 1 | 0.00 | 0.00 |
| 7q#102006_102057  | 7  | 99108714-99392632   | 283919  | AUTS2                                              | 0           |   | 1 | 0.00 | 0.00 |
| 7q#102159_102178  | 7  | 100045123-100184952 | 139830  | 91, BC022382, ZKSCAN1, AK056630, ZNF38, ZNF3, CO   | 0           |   | 1 | 0.00 | 0.00 |
| 7q#102179_102182  | 7  | 100194836-100226770 | 31935   | EPHB4, BC006217, SLC12A9, TRIP6, ARS2, ACHE        | 0           |   | 1 | 0.00 | 0.00 |
| 7q#102183_102187  | 7  | 100242447-100281214 | 38768   | BC006217                                           | 0           |   | 1 | 0.00 | 0.00 |
| 7q#106879_106923  | 7  | 151757726-152558100 | 800375  | BC006217, MUC17                                    | 0           |   | 1 | 0.00 | 0.00 |
|                   |    |                     |         | XRCC2, ACTR3B                                      | 0           |   | 1 | 0.00 | 0.00 |



|                   |    |                     |         |                                                    |             |   |      |      |
|-------------------|----|---------------------|---------|----------------------------------------------------|-------------|---|------|------|
| 7q#106924_106946  | 7  | 152567688-153088980 | 521293  | DPP6                                               | 0           | 1 | 0.00 | 0.00 |
| 7q#106947_106951  | 7  | 153097195-153185109 | 87915   | DPP6                                               | 0           | 1 | 0.00 | 0.00 |
| 7q#106957_106994  | 7  | 153306561-153661527 | 354967  | DPP6                                               | 0           | 1 | 0.00 | 0.00 |
| 7q#107178_107211  | 7  | 155552015-155956928 | 404914  | AK090852, AF439977, C7orf13, RNF32                 | 0           | 1 | 0.00 | 0.00 |
| 7q#107212_107285  | 7  | 155969175-156649036 | 679862  | LMBR1, NOM1, AY927457, HLBX9, BC022831, BC0948     | 0           | 1 | 0.00 | 0.00 |
| 7q#107367_107406  | 7  | 157318086-157677370 | 359285  | PTRN2                                              | 0           | 1 | 0.00 | 0.00 |
| 7q#107431_107432  | 7  | 157883991-157892303 | 8313    |                                                    | 0           | 1 | 0.00 | 0.00 |
| 7q#107446_107451  | 7  | 158006798-158063417 | 56620   | FAM62B                                             | 0           | 1 | 0.00 | 0.00 |
| 7q#107452_107454  | 7  | 158070702-158085832 | 15131   | FAM62B                                             | 0           | 1 | 0.00 | 0.00 |
| 12q#157340_157354 | 12 | 76355136-76727700   | 372565  | NAV3                                               | 0           | 1 | 0.00 | 0.00 |
| 12q#157363_157405 | 12 | 76801208-77338106   | 536899  | NAV3, BC045810                                     | 0           | 1 | 0.00 | 0.00 |
| 12q#157406_157485 | 12 | 77368746-78278340   | 909595  | AK055805, AK094616, SYT1                           | Inf         | 1 | 0.02 | 0.00 |
| 12q#157504_157516 | 12 | 78500836-78633946   | 133111  | PAWR                                               | 0           | 1 | 0.00 | 0.00 |
| 12q#157517_157545 | 12 | 78654777-78951744   | 296968  | PPP1R12A, BC037874                                 | 0           | 1 | 0.00 | 0.00 |
| 12q#157546_157553 | 12 | 78998250-79135624   | 137375  |                                                    | 0           | 1 | 0.00 | 0.00 |
| 12q#161826_161832 | 12 | 131284641-131320853 | 36213   | BC063603, DDJ51, NOC4L                             | 0           | 1 | 0.00 | 0.00 |
| 17q#195118_195120 | 17 | 23210891-23246334   | 35444   | AK097755                                           | 0.686886232 | 1 | 0.03 | 0.05 |
| 20q#214855_214868 | 20 | 30090385-30233376   | 142992  | HCK, AK126534, TM9SF4                              | 0           | 1 | 0.00 | 0.00 |
| 20q#214932_215008 | 20 | 30793762-31418317   | 624556  | BPIL1, AY927631, BPIL3, C20orf185, C20orf186, C20o | 0           | 1 | 0.00 | 0.00 |
| 17q#196483_196487 | 17 | 35942093-35965572   | 23480   | CCR7                                               | 0           | 1 | 0.00 | 0.00 |
| 17q#196459_196468 | 17 | 35779708-35840994   | 61287   | TOP2A                                              | Inf         | 1 | 0.02 | 0.00 |
| 17q#196488_196493 | 17 | 35973933-36031701   | 57769   | CCR7                                               | 0           | 1 | 0.00 | 0.00 |
| 16p#186504_186511 | 16 | 3186299-3236580     | 50282   | OR1F1, ZNF200, MEFV                                | 1.398928118 | 1 | 0.03 | 0.02 |
| 16p#186649_186683 | 16 | 4335629-4588070     | 252442  | L833954, CORO7, DNAJA3, AK128595, NMRAL1, HMO      | 1.398928118 | 1 | 0.03 | 0.02 |
| 17q#200388_200416 | 17 | 76749430-76966451   | 217022  | J44861, AZI1, C17orf56, MGC15523, C17orf55, TMEM1  | Inf         | 1 | 0.02 | 0.00 |
| 20q#215398_215434 | 20 | 34742767-35040872   | 298106  | NDRG3, C20orf172, C20orf117, C20orf118, SAMHD1     | 0           | 1 | 0.00 | 0.00 |
| 20q#215446_215449 | 20 | 35163023-35193291   | 30269   | C20orf132                                          | 0           | 1 | 0.00 | 0.00 |
| 17q#200417_200419 | 17 | 76973760-77000894   | 27135   |                                                    | Inf         | 1 | 0.02 | 0.00 |
| 17q#200428_200436 | 17 | 77072640-77127279   | 54640   | CR590345, ACTG1, FSCN2, C17orf70                   | Inf         | 1 | 0.02 | 0.00 |
| 17q#200420_200426 | 17 | 77012812-77053240   | 40429   | ABO40880, BC033222                                 | Inf         | 1 | 0.02 | 0.00 |
| 17q#195670_195680 | 17 | 27898350-27989973   | 91624   | MYO1D                                              | 0           | 1 | 0.00 | 0.00 |
| 17q#195681_195721 | 17 | 27998636-28380048   | 381413  | YO1D, TMEM98, CR617078, AY358653, SPACA3, ACC1     | 0           | 1 | 0.00 | 0.00 |
| 17q#195789_195809 | 17 | 28971479-29176298   | 204820  | ACCN1                                              | 0           | 1 | 0.00 | 0.00 |
| 5q#70754_70771    | 5  | 52109445-52229968   | 120524  | PELO, ITGA1                                        | 0           | 1 | 0.00 | 0.00 |
| 7p#98892_98900    | 7  | 55921886-55961853   | 39968   | SUMF2, PHKG1, Y10275, CHCHD2                       | 0           | 1 | 0.00 | 0.00 |
| 7p#98675_98685    | 7  | 52374026-52646160   | 272135  |                                                    | 0           | 1 | 0.00 | 0.00 |
| 6q#87252_87269    | 6  | 76687994-76852953   | 164960  | IMPG1                                              | 0           | 1 | 0.00 | 0.00 |
| 6q#87153_87156    | 6  | 75698247-75787079   | 88833   |                                                    | 0           | 1 | 0.00 | 0.00 |
| 6q#87157_87215    | 6  | 75814700-76314693   | 499994  | L12A1, COX7A2, TMEM30A, BC042026, AL832009, FIL    | 0           | 1 | 0.00 | 0.00 |
| 6q#87231_87251    | 6  | 76498451-76678155   | 179705  | MYO6                                               | 0           | 1 | 0.00 | 0.00 |
| 6q#87270_87272    | 6  | 76896935-76958476   | 61542   |                                                    | 0           | 1 | 0.00 | 0.00 |
| 10p#128980_129016 | 10 | 11509342-11906717   | 397376  | AK128425, D13644, ECHDC3, C10orf47                 | Inf         | 1 | 0.02 | 0.00 |
| 7p#98901_98928    | 7  | 55973561-56418064   | 444504  | AL713776, BC035176                                 | 0           | 1 | 0.00 | 0.00 |
| 7p#98929_98944    | 7  | 56425629-56569274   | 143646  |                                                    | 0           | 1 | 0.00 | 0.00 |
| 7p#98975_98980    | 7  | 57285295-57323930   | 38636   | AK131575                                           | 0           | 1 | 0.00 | 0.00 |
| 6q#87145_87152    | 6  | 75511718-75657066   | 145349  |                                                    | 0           | 1 | 0.00 | 0.00 |
| 12q#159214_159228 | 12 | 102290867-102449896 | 159030  | C12orf42, BC041342                                 | 0           | 1 | 0.00 | 0.00 |
| 6q#87138_87144    | 6  | 75419418-75473056   | 53639   | AF086303                                           | 0           | 1 | 0.00 | 0.00 |
| 6q#87222_87230    | 6  | 76412623-76490972   | 78350   | SENP6                                              | 0           | 1 | 0.00 | 0.00 |
| 18q#204271_204327 | 18 | 47174275-48351914   | 1177640 | AK094936, DCC                                      | 0           | 1 | 0.00 | 0.00 |
| 12q#160075_160154 | 12 | 111035243-111931428 | 896186  | AB014514, C12orf51, RPL6, PTFN11, RPH3A, OAS1, AJ  | 0           | 1 | 0.00 | 0.00 |
| 7p#98583_98612    | 7  | 50531811-50927822   | 396012  | GRB10, COBL                                        | 0           | 1 | 0.00 | 0.00 |
| 7p#98949_98974    | 7  | 57036241-57278054   | 241814  |                                                    | 0           | 1 | 0.00 | 0.00 |
| 18q#203609_203611 | 18 | 40090823-40161066   | 70244   | BC051727                                           | 0           | 1 | 0.00 | 0.00 |
| 6q#86333_86342    | 6  | 63711568-63986751   | 275184  |                                                    | 0           | 1 | 0.00 | 0.00 |

|                   |    |                     |         |                                                   |             |   |      |      |
|-------------------|----|---------------------|---------|---------------------------------------------------|-------------|---|------|------|
| 12q#158062_158073 | 12 | 87056389-87258409   | 202021  | TMTC3, CR749309                                   | 0           | 1 | 0.00 | 0.00 |
| 6p#86175_86177    | 6  | 57321183-57333618   | 12436   | PRIM2A                                            | 0           | 1 | 0.00 | 0.00 |
| 12q#159195_159213 | 12 | 102109003-102278568 | 169566  | BC039352, C12orf42                                | 0           | 1 | 0.00 | 0.00 |
| 7q#101705_101722  | 7  | 95806954-96058317   | 251364  | SHFM1                                             | 0           | 1 | 0.00 | 0.00 |
| 18q#206429_206442 | 18 | 75987864-76111023   | 123160  | KIAA0863, AK056304, PARD6G                        | 0           | 1 | 0.00 | 0.00 |
| 2p#26403_26404    | 2  | 89947246-89953772   | 6527    | AY942117                                          | 0           | 1 | 0.00 | 0.00 |
| 12q#160044_160074 | 12 | 110771592-111024451 | 252860  | MAPKAPK5, AL833501, TMEEM116, ERP29, C12orf30     | 0           | 1 | 0.00 | 0.00 |
| 12q#158108_158183 | 12 | 88142818-89767081   | 1624264 | DUSP6, WDR51B, ATP2B1                             | 0           | 1 | 0.00 | 0.00 |
| 12q#158215_158274 | 12 | 90042153-91294869   | 1252717 | DCN, BC029844, BTG1, BC044741                     | 0           | 1 | 0.00 | 0.00 |
| 12q#158862_158867 | 12 | 98479949-98533225   | 53277   | ANKS1B                                            | 0           | 1 | 0.00 | 0.00 |
| 6p#85884_85962    | 6  | 53832332-54873372   | 1041041 | LRRC1, BX640790, C6orf142, TINAG, FAM83B          | 0           | 1 | 0.00 | 0.00 |
| 7q#101581_101632  | 7  | 94604155-95093000   | 488846  | PON3, PON2, ASB4, AK096449, PDK4, DYNC111         | 0           | 1 | 0.00 | 0.00 |
| 7q#101651_101704  | 7  | 95280074-95786850   | 506777  | DYNC111, AK057770, SLC25A13, FLJ42280             | 0           | 1 | 0.00 | 0.00 |
| 7q#101732_101759  | 7  | 96269018-96582367   | 313350  | AK095619, DLX6, DLX5, ACN9                        | 0           | 1 | 0.00 | 0.00 |
| 12q#161925_161933 | 12 | 132153240-132199510 | 46271   | ZNF26                                             | 0           | 1 | 0.00 | 0.00 |
| 12q#154675_154692 | 12 | 47682992-47780712   | 97721   | PRKAG1, MLL2, RHEBL1, DHH, LMBR1L                 | 0           | 1 | 0.00 | 0.00 |
| 12q#154693_154702 | 12 | 47787603-47847026   | 59424   | LMBR1L, K-ALPHA-1, CR611979                       | 0           | 1 | 0.00 | 0.00 |
| 12q#155061_155085 | 12 | 50620029-50836389   | 216361  | CVR1B, GRASP, AK131566, NR4A1, C12orf44, BC04204  | 0           | 1 | 0.00 | 0.00 |
| 12q#155170_155261 | 12 | 51324904-51886396   | 561493  | AK096419, K5B, KRT8, KRT18, EIF4B, CR590020, TENC | 0           | 1 | 0.00 | 0.00 |
| 12q#155262_155364 | 12 | 51890624-52682726   | 792103  | 3K12, TARBP2, NPFF, AK054879, ATF7, ATP5G2, CAL   | 0           | 1 | 0.00 | 0.00 |
| 12q#155371_155420 | 12 | 52713037-53064217   | 351181  | AK056315, CR605190, CBX5, HNRPA1, BC070315, NF    | 0           | 1 | 0.00 | 0.00 |
| 12q#155421_155426 | 12 | 53069325-53089178   | 19854   | AK222845, ITGA5                                   | 0           | 1 | 0.00 | 0.00 |
| 12q#157829_157844 | 12 | 83621897-83864365   | 242469  | SLC6A15                                           | 0           | 1 | 0.00 | 0.00 |
| 12q#157862_157921 | 12 | 84116330-84980205   | 863876  | CART1, PAMCI, NTS, MGAT4C                         | 0           | 1 | 0.00 | 0.00 |
| 12q#158074_158103 | 12 | 87329145-88031716   | 702572  | KITLG                                             | 0           | 1 | 0.00 | 0.00 |
| 12q#158104_158107 | 12 | 88052191-88127932   | 75742   |                                                   | 0           | 1 | 0.00 | 0.00 |
| 12q#158184_158214 | 12 | 89797929-90029263   | 231335  | AK058107, C12orf12, DSPG3, KERA, LUM              | 0           | 1 | 0.00 | 0.00 |
| 12q#158390_158403 | 12 | 92701929-92932895   | 230967  | CRADD                                             | 0           | 1 | 0.00 | 0.00 |
| 12q#158412_158422 | 12 | 93087244-93175872   | 88629   | PLXNC1                                            | 0           | 1 | 0.00 | 0.00 |
| 12q#158844_158861 | 12 | 98309212-98464072   | 154861  | ANKS1B                                            | 0           | 1 | 0.00 | 0.00 |
| 12q#158868_158904 | 12 | 98537024-98858032   | 321009  | ANKS1B                                            | 0           | 1 | 0.00 | 0.00 |
| 12q#158932_158942 | 12 | 99108686-99216305   | 107620  | ACTR6, BC042997, DEPDC4, SCYL2                    | 0           | 1 | 0.00 | 0.00 |
| 12q#160040_160043 | 12 | 110743557-110765888 | 22332   | MAPKAPK5                                          | 0           | 1 | 0.00 | 0.00 |
| 12q#161172_161189 | 12 | 122879725-123028735 | 149011  | AB095937, CCDC92, ZNF664                          | 0           | 1 | 0.00 | 0.00 |
| 12q#161190_161202 | 12 | 123039912-123298611 | 258700  | BC033539                                          | 0           | 1 | 0.00 | 0.00 |
| 12q#161217_161221 | 12 | 123410815-123446212 | 35398   | NCOR2                                             | 0           | 1 | 0.00 | 0.00 |
| 12q#161262_161268 | 12 | 123935760-123977577 | 41818   | DHX37                                             | 0           | 1 | 0.00 | 0.00 |
| 12q#161270_161297 | 12 | 123995524-124330686 | 335163  | DHX37, BRI3BP, AF284094, AACS                     | 0           | 1 | 0.00 | 0.00 |
| 12q#161298_161303 | 12 | 124342137-124361815 | 19679   | TMEEM132B                                         | 0           | 1 | 0.00 | 0.00 |
| 12q#161304_161408 | 12 | 124370912-126509640 | 2138729 | 7846, AK056757, BC038735, BC035235, AY070435, BC  | 0           | 1 | 0.00 | 0.00 |
| 12q#161934_161957 | 12 | 132212891-132389426 | 176536  | ZNF84, AK055603, ZNF140, ZNF10, ZNF268            | 0           | 1 | 0.00 | 0.00 |
| 21q#220218_220255 | 21 | 39236689-39570019   | 333331  | DSCR2, BRWD1                                      | 0           | 1 | 0.00 | 0.00 |
| 22q#224834_224842 | 22 | 44826287-44855543   | 29257   | FLJ27365, CR602657, AK127117                      | 0           | 1 | 0.00 | 0.00 |
| 17q#195304_195327 | 17 | 24597516-24818277   | 220762  | CRYBA1, NUFIP2, AK130695, TAOK1                   | 1.044194198 | 1 | 0.05 | 0.05 |
| 17q#195328_195339 | 17 | 24826833-24908884   | 82052   | TAOK1, BC037740                                   | 0.686886232 | 1 | 0.03 | 0.05 |
| 17q#195352_195353 | 17 | 24966191-24974576   | 8386    | CORO6                                             | 1.044194198 | 1 | 0.05 | 0.05 |
| 17q#195381_195391 | 17 | 25252649-25344477   | 91829   | SSH2, EFCAB5                                      | 0.686886232 | 1 | 0.03 | 0.05 |
| 12q#156083_156091 | 12 | 59896093-60060553   | 164461  |                                                   | Inf         | 1 | 0.02 | 0.00 |
| 12q#156119_156192 | 12 | 60562567-61271545   | 708979  | FAM19A2, AK123580, USP15, MON2                    | Inf         | 1 | 0.02 | 0.00 |
| 7p#97682_97715    | 7  | 39620624-40007905   | 387282  | CDC2L5, C7orf11, C7orf10                          | 0           | 1 | 0.00 | 0.00 |
| 7p#98268_98269    | 7  | 46870882-46877151   | 6270    |                                                   | 0           | 1 | 0.00 | 0.00 |
| 12q#156867_156999 | 12 | 69197447-70560662   | 1363216 | 5, PTPRR, TSPAN8, BC070168, LGR5, PSRC2, THAP2    | 0.692294348 | 1 | 0.02 | 0.02 |
| 12q#157098_157122 | 12 | 72011151-72552300   | 541150  |                                                   | Inf         | 1 | 0.02 | 0.00 |
| 12q#157201_157202 | 12 | 74043114-74050342   | 7229    | CAPS2                                             | Inf         | 1 | 0.02 | 0.00 |
| 7q#104814_104975  | 7  | 131334006-132940552 | 1606547 | 046770, PLXNA4B, FLJ40288, AK024938, CHCHD3, EXC  | 0           | 1 | 0.00 | 0.00 |

|                   |    |                     |        |                                                    |             |   |      |      |
|-------------------|----|---------------------|--------|----------------------------------------------------|-------------|---|------|------|
| 7q#104446_104455  | 7  | 127716117-127876131 | 160015 | METTL2B, BC062355                                  | 0           | 1 | 0.00 | 0.00 |
| 7q#105900_105912  | 7  | 142013862-142097321 | 83460  | LOC647353, AF088770, EPHB6, TRPV6                  | 0           | 1 | 0.00 | 0.00 |
| 7q#106534_106558  | 7  | 148595996-148842034 | 246039 | ZNF746, FLJ12700                                   | 0           | 1 | 0.00 | 0.00 |
| 7q#106560_106568  | 7  | 148859310-148916158 | 56849  | KIAA1862, ZNF467, AK127639                         | 0           | 1 | 0.00 | 0.00 |
| 7q#106575_106576  | 7  | 148962198-148968735 | 6538   | AK123170                                           | 0           | 1 | 0.00 | 0.00 |
| 7q#105861_105889  | 7  | 141691765-141958975 | 267211 | LOC647353                                          | 0           | 1 | 0.00 | 0.00 |
| 7q#106852_106866  | 7  | 151381852-151531364 | 149513 | MLL3                                               | 0           | 1 | 0.00 | 0.00 |
| 7q#102072_102078  | 7  | 99467298-99584527   | 117230 | GATS, AK055274, PILRB                              | 0           | 1 | 0.00 | 0.00 |
| 7q#105897_105899  | 7  | 141993812-142009048 | 15237  | LOC647353                                          | 0           | 1 | 0.00 | 0.00 |
| 7q#106472_106533  | 7  | 148015411-148589828 | 574418 | 621137, ZNF425, ZNF398, ZNF282, ZNF212, LOC155066  | 0           | 1 | 0.00 | 0.00 |
| 7q#106569_106574  | 7  | 148921623-148933654 | 32032  | AK127639, AB111888                                 | 0           | 1 | 0.00 | 0.00 |
| 7q#106582_106598  | 7  | 149005573-149428016 | 422444 | LOC401431, ATP6V0E2L, BX640643                     | 0           | 1 | 0.00 | 0.00 |
| 7q#106817_106851  | 7  | 151011325-151373799 | 362475 | PRKAG2, GALNTL5, GALNT11, MLL3                     | 0           | 1 | 0.00 | 0.00 |
| 7q#107076_107112  | 7  | 154524178-154880691 | 356514 | NSIG1, AY166699, AK054822, AK123150, EN2, AK09444  | 0           | 1 | 0.00 | 0.00 |
| 12q#157123_157151 | 12 | 72567193-73170242   | 603050 | BC061638                                           | Inf         | 1 | 0.02 | 0.00 |
| 20q#215690_215693 | 20 | 38563486-38702361   | 138876 |                                                    | 0           | 1 | 0.00 | 0.00 |
| 20q#215741_215747 | 20 | 39383030-39422658   | 39629  | LPIN3                                              | 0           | 1 | 0.00 | 0.00 |
| 16p#186029_186054 | 16 | 74248-244508        | 170261 | MPG, C16orf35, LUC7L, ITFG3                        | Inf         | 1 | 0.02 | 0.00 |
| 16p#186055_186059 | 16 | 250794-273800       | 23007  | ITFG3, RGS11, ARHGDIG, PDIA2                       | 0.692294348 | 1 | 0.02 | 0.02 |
| 16p#186060_186067 | 16 | 279960-336442       | 56483  | AXIN1                                              | 0.692294348 | 1 | 0.02 | 0.02 |
| 16p#186079_186091 | 16 | 390584-479146       | 88563  | NME4, DECR2, BC064904, RAB11FIP3                   | 0.692294348 | 1 | 0.02 | 0.02 |
| 16p#186092_186093 | 16 | 486776-496767       | 9992   | RAB11FIP3                                          | 0.692294348 | 1 | 0.02 | 0.02 |
| 17q#195471_195508 | 17 | 26095238-26401177   | 305940 | CRLF3, C17orf41, C17orf42, CENTA2, AK092436, RNF13 | 0           | 1 | 0.00 | 0.00 |
| 17q#195509_195550 | 17 | 26409508-26783013   | 373506 | NF1, RAB11FIP4                                     | 0           | 1 | 0.00 | 0.00 |
| 5p#67494_67495    | 5  | 719885-726001       | 6117   | TPPP                                               | 0           | 1 | 0.00 | 0.00 |
| 20q#215081_215092 | 20 | 32090081-32202715   | 112635 | RALY, CR623780, EIF2S2                             | 0           | 1 | 0.00 | 0.00 |
| 20q#214784_214791 | 20 | 29575050-29630772   | 55723  | HM13                                               | 0           | 1 | 0.00 | 0.00 |
| 20q#214792_214854 | 20 | 29635963-30078820   | 442858 | AJ272502, MYLK2, FKHL18, AK097430, DUSP15, TTL     | 0           | 1 | 0.00 | 0.00 |
| 20q#215009_215080 | 20 | 31425674-32084370   | 658697 | CBFA2T2, APBA2BP, E2F1, PXMP4, ZNF341, CHMP4       | 0           | 1 | 0.00 | 0.00 |
| 20q#215093_215129 | 20 | 32233259-32584682   | 351424 | ASIP, AHCY, AK097610, ITCH, AK096092, DYNLRB1      | 0           | 1 | 0.00 | 0.00 |
| 20q#215130_215135 | 20 | 32589008-32619855   | 30848  | DYNLRB1, MAP1LC3A, CDC91L1                         | 0           | 1 | 0.00 | 0.00 |
| 14q#177897_177901 | 14 | 106017453-106056671 | 39219  | AK125079                                           | 0           | 1 | 0.00 | 0.00 |
| 14q#177902_177916 | 14 | 106061322-106205906 | 144585 | AK125079, Z47244                                   | 0           | 1 | 0.00 | 0.00 |
| 14q#174089_174134 | 14 | 67662397-68027480   | 365084 | RAD51L1                                            | 0           | 1 | 0.00 | 0.00 |
| 14q#177895_177896 | 14 | 105994646-106002238 | 7593   | AK125079                                           | 0           | 1 | 0.00 | 0.00 |
| 7q#99126_99129    | 7  | 63922403-64011163   | 88761  | BX649060                                           | 0           | 1 | 0.00 | 0.00 |
| 18q#202817_202819 | 18 | 28555707-28575939   | 20233  | KLHL14                                             | 0           | 1 | 0.00 | 0.00 |
| 14q#170534_170539 | 14 | 26152867-26243871   | 91005  |                                                    | 0           | 1 | 0.00 | 0.00 |
| 7p#98876_98883    | 7  | 55815158-55871609   | 56452  | GBAS, PSPH                                         | 0           | 1 | 0.00 | 0.00 |
| 18q#202820_202901 | 18 | 28589320-29493314   | 903995 | KLHL14, C18orf34, BX648108, AK131454               | 0           | 1 | 0.00 | 0.00 |
| 18q#202912_202913 | 18 | 29636646-29660811   | 24166  |                                                    | 0           | 1 | 0.00 | 0.00 |
| 18q#202925_202994 | 18 | 29770832-30591954   | 821123 | NOL4, DTNA                                         | 0           | 1 | 0.00 | 0.00 |
| 14q#170505_170510 | 14 | 25845033-25966517   | 121485 |                                                    | 0           | 1 | 0.00 | 0.00 |
| 14q#170523_170533 | 14 | 26063985-26138885   | 74901  | NOVA1                                              | 0           | 1 | 0.00 | 0.00 |
| 7p#98332_98355    | 7  | 47655913-47847264   | 191352 | PKD1L1, AF076844, HUS1, SUNC1                      | 0           | 1 | 0.00 | 0.00 |
| 14q#171155_171159 | 14 | 34155635-34188725   | 33091  | SNX6                                               | 0           | 1 | 0.00 | 0.00 |
| 14q#171304_171313 | 14 | 35569062-35773622   | 204561 |                                                    | 0           | 1 | 0.00 | 0.00 |
| 18q#202902_202911 | 18 | 29507707-29611344   | 103638 | AK131454, AB051500                                 | 0           | 1 | 0.00 | 0.00 |
| 14q#171101_171106 | 14 | 33436341-33477868   | 41528  | EGLN3                                              | 0           | 1 | 0.00 | 0.00 |
| 14q#171316_171353 | 14 | 35817248-36180067   | 362820 | MBIP, AY102071, TITF1, NKX2-8, AY0644415           | 0           | 1 | 0.00 | 0.00 |
| 14q#177862_177863 | 14 | 105680951-105693640 | 12690  | LOC652848                                          | 0           | 1 | 0.00 | 0.00 |
| 7q#99130_99198    | 7  | 64053979-64959972   | 905994 | LOC441242, VKORC1L1, GUSB                          | 0           | 1 | 0.00 | 0.00 |
| 7q#99519_99528    | 7  | 69476649-69540459   | 63811  | AUTS2                                              | 0           | 1 | 0.00 | 0.00 |
| 14q#172753_172772 | 14 | 54468138-54602502   | 134365 | WDHD1, SOCS4, AF085897, C14orf32                   | 0           | 1 | 0.00 | 0.00 |
| 14q#170503_170504 | 14 | 25759212-25805900   | 46689  |                                                    | 0           | 1 | 0.00 | 0.00 |

|                   |    |                     |         |                                                      |     |   |      |      |
|-------------------|----|---------------------|---------|------------------------------------------------------|-----|---|------|------|
| 14q#170116_170130 | 14 | 22113248-22259371   | 146124  | DAD1, AK095409, ABHD4                                | 0   | 1 | 0.00 | 0.00 |
| 14q#171296_171303 | 14 | 35396910-35543632   | 146723  | BRMS1L                                               | 0   | 1 | 0.00 | 0.00 |
| 14q#171785_171826 | 14 | 42055846-43227015   | 1171170 | BC043513                                             | 0   | 1 | 0.00 | 0.00 |
| 14q#171107_171154 | 14 | 33487508-34147004   | 659497  | EGLN3, C14orf147, C14orf11, SNX6                     | 0   | 1 | 0.00 | 0.00 |
| 14q#171314_171315 | 14 | 35795148-35809441   | 14294   |                                                      | 0   | 1 | 0.00 | 0.00 |
| 14q#171354_171365 | 14 | 36188230-36250332   | 62103   | AK124214, PAX9, BC001159, SLC25A21                   | 0   | 1 | 0.00 | 0.00 |
| 14q#171844_171852 | 14 | 43692760-43884075   | 191316  |                                                      | 0   | 1 | 0.00 | 0.00 |
| 14q#171859_171871 | 14 | 44018575-44224074   | 205500  | AL136775, C14orf155                                  | 0   | 1 | 0.00 | 0.00 |
| 14q#172690_172752 | 14 | 53972827-54456716   | 483890  | CNIH, GMFB, GRRF1, SAMD4A, GCH1                      | 0   | 1 | 0.00 | 0.00 |
| 7q#102151_102152  | 7  | 99977919-99981765   | 3847    | ZAN                                                  | 0   | 1 | 0.00 | 0.00 |
| 7q#99199_99252    | 7  | 64980069-65416882   | 436814  | ASL, RCP9, BC052570, TPST1, LOC285908, AL117552      | 0   | 1 | 0.00 | 0.00 |
| 7q#99302_99311    | 7  | 65910367-66016467   | 106101  | RSAFD1                                               | 0   | 1 | 0.00 | 0.00 |
| 7q#99320_99340    | 7  | 66145067-66674535   | 529469  | RSAFD1, D38438, AK023257                             | 0   | 1 | 0.00 | 0.00 |
| 7q#99543_99649    | 7  | 69684962-70836109   | 1151148 | AUTS2, WBSCR17, CALN1                                | 0   | 1 | 0.00 | 0.00 |
| 12q#161789_161796 | 12 | 130998226-131065516 | 67291   | MMP17, ULK1                                          | 0   | 1 | 0.00 | 0.00 |
| 18q#206002_206064 | 18 | 71165120-71976754   | 811635  | LOC284274, BC037384, BC043002                        | 0   | 1 | 0.00 | 0.00 |
| 6p#86182_86194    | 6  | 57385752-57511924   | 126173  | PRIM2A                                               | 0   | 1 | 0.00 | 0.00 |
| 14q#171827_171843 | 14 | 43248811-43672160   | 423350  |                                                      | 0   | 1 | 0.00 | 0.00 |
| 14q#171872_171919 | 14 | 44259404-44714102   | 454699  | C14orf28, AK090972, BTBD5, KIAA0423, PRPF39, FKB     | 0   | 1 | 0.00 | 0.00 |
| 7q#107463_107471  | 7  | 158168687-158244753 | 76067   | WDR60                                                | 0   | 1 | 0.00 | 0.00 |
| 7q#102153_102158  | 7  | 99990574-100039988  | 49415   | ZAN                                                  | 0   | 1 | 0.00 | 0.00 |
| 7q#102227_102230  | 7  | 100483528-100502304 | 18777   | AK091729                                             | 0   | 1 | 0.00 | 0.00 |
| 12q#161783_161787 | 12 | 130950352-130987450 | 37099   | SFRS8, MMP17                                         | 0   | 1 | 0.00 | 0.00 |
| 18q#205520_205644 | 18 | 63952985-65691372   | 1738388 | NDC10, AK091108, CR749520, CCDC102B, DOK6, CD        | 0   | 1 | 0.00 | 0.00 |
| 18q#205932_206001 | 18 | 70588187-71152747   | 564561  | ZNF407, AB051490, ZADH2, TSHZ1                       | 0   | 1 | 0.00 | 0.00 |
| 18q#205490_205493 | 18 | 63419131-63469362   | 50232   | BC053410                                             | 0   | 1 | 0.00 | 0.00 |
| 18q#206065_206194 | 18 | 71985222-73379609   | 1394388 | LJ44313, AK093936, AK094957, FLJ44881, BC032908,     | 0   | 1 | 0.00 | 0.00 |
| 7q#99312_99319    | 7  | 66026517-66116784   | 90268   | RSAFD1                                               | 0   | 1 | 0.00 | 0.00 |
| 7q#99650_99662    | 7  | 70843197-70940108   | 96912   | CALN1                                                | 0   | 1 | 0.00 | 0.00 |
| 7q#99663_99708    | 7  | 70949080-71369977   | 420898  | CALN1, AF282250                                      | 0   | 1 | 0.00 | 0.00 |
| 7q#107407_107423  | 7  | 157685406-157808369 | 122964  | PTPRN2                                               | 0   | 1 | 0.00 | 0.00 |
| 7q#107424_107430  | 7  | 157817763-157875342 | 57580   | PTPRN2                                               | 0   | 1 | 0.00 | 0.00 |
| 7q#107455_107462  | 7  | 158091172-158158754 | 67583   | FAM62B, WDR60                                        | 0   | 1 | 0.00 | 0.00 |
| 12q#155107_155121 | 12 | 50977596-51069304   | 91709   | AJ238246, KRTHB6, KRTHB3, KRTHB5, KRTHB4             | 0   | 1 | 0.00 | 0.00 |
| 12q#155461_155498 | 12 | 53336728-53708822   | 372095  | 22845, SBEM, AB018291, CR600998, NEUROD4, BC04       | 0   | 1 | 0.00 | 0.00 |
| 12q#157554_157724 | 12 | 79146679-81335047   | 2188369 | MYF5, BC041400, LIN7A, FLJ21963, PPFIA2, BC031963,   | 0   | 1 | 0.00 | 0.00 |
| 12q#158747_158749 | 12 | 97418949-97434047   | 15099   | TMPO                                                 | 0   | 1 | 0.00 | 0.00 |
| 12q#161798_161825 | 12 | 131075319-131276926 | 201608  | PUS1, EP400, AK126212, EP400NL                       | 0   | 1 | 0.00 | 0.00 |
| 18q#205512_205519 | 18 | 63737102-63923394   | 186293  |                                                      | 0   | 1 | 0.00 | 0.00 |
| 18q#205737_205750 | 18 | 67282403-67593083   | 310681  | BX648957                                             | 0   | 1 | 0.00 | 0.00 |
| 18q#205928_205931 | 18 | 70555198-70582162   | 26965   | ZNF407                                               | 0   | 1 | 0.00 | 0.00 |
| 20q#215184_215191 | 20 | 33032847-33046708   | 13862   | MYH7B                                                | 0   | 1 | 0.00 | 0.00 |
| 20q#215138_215164 | 20 | 32650093-32875951   | 225859  | CDC91L1, TP53INP2, NCOA6                             | 0   | 1 | 0.00 | 0.00 |
| 20q#215192_215217 | 20 | 33049575-33259421   | 209847  | MYH7B, TRPC4AP, EDEM2, PROCR                         | 0   | 1 | 0.00 | 0.00 |
| 6q#87884_87930    | 6  | 87697052-88061788   | 364737  | 24925, HTR1E, CGA, BC040712, AK123473, BX537746,     | 0   | 1 | 0.00 | 0.00 |
| 6q#86742_86758    | 6  | 71044197-71233124   | 188928  | COL9A1, KIAA1411                                     | Inf | 1 | 0.02 | 0.00 |
| 6q#86688_86729    | 6  | 70508442-70898510   | 390069  | LMBRD1, COL19A1                                      | 0   | 1 | 0.00 | 0.00 |
| 6q#86730_86736    | 6  | 70908533-70975198   | 66666   | COL19A1                                              | Inf | 1 | 0.02 | 0.00 |
| 6q#87775_87790    | 6  | 85426488-85660482   | 233995  | BC040697                                             | 0   | 1 | 0.00 | 0.00 |
| 6q#87931_87946    | 6  | 88079350-88177138   | 97789   | JB7, AF311339, C6orf162, BC032824, C6orf163, C6orf16 | 0   | 1 | 0.00 | 0.00 |
| 6q#87957_87968    | 6  | 88278243-88350130   | 71888   | SLC35A1, RARSL                                       | 0   | 1 | 0.00 | 0.00 |
| 6q#88074_88163    | 6  | 89846398-90587527   | 741130  | CY1L2, GABRR1, GABRR2, UBE2J1, AK127507, RRAG        | 0   | 1 | 0.00 | 0.00 |
| 6q#88218_88237    | 6  | 91152410-91436233   | 283824  | MAP3K7                                               | 0   | 1 | 0.00 | 0.00 |
| 6q#89932_89940    | 6  | 118331314-118413577 | 82264   | SLC35F1                                              | 0   | 1 | 0.00 | 0.00 |
| 8p#109914_109918  | 8  | 29181358-29240892   | 59535   |                                                      | 0   | 1 | 0.00 | 0.00 |

|                   |    |                     |         |                                                    |     |   |      |      |
|-------------------|----|---------------------|---------|----------------------------------------------------|-----|---|------|------|
| 8p#109844_109913  | 8  | 28510865-29174810   | 663946  | EXTL3, CR749646, RC74, HMBOX1, BX648950, KIF13E    | 0   | 1 | 0.00 | 0.00 |
| 8p#107838_107841  | 8  | 3553426-3575764     | 22339   | CSMD1                                              | 0   | 1 | 0.00 | 0.00 |
| 6q#86686_86687    | 6  | 70485537-70500516   | 14980   | LMBRD1                                             | 0   | 1 | 0.00 | 0.00 |
| 6q#87947_87956    | 6  | 88184801-88272557   | 87757   | C6orf165, AK127976, SLC35A1                        | 0   | 1 | 0.00 | 0.00 |
| 6q#87969_88073    | 6  | 88355973-89838046   | 1482074 | BL, C6orf166, AY927642, SPACA1, CNR1, X54937, AK13 | 0   | 1 | 0.00 | 0.00 |
| 6q#89941_89968    | 6  | 118421507-118665604 | 244098  | SLC35F1                                            | 0   | 1 | 0.00 | 0.00 |
| 6q#90605_90625    | 6  | 127553329-127748286 | 194958  | RSPO3, AF251057, AK027346, RNF146, ECHDC1          | 0   | 1 | 0.00 | 0.00 |
| 18p#201899_201903 | 18 | 14210766-14501952   | 291187  | BC089388, BX649118                                 | 0   | 1 | 0.00 | 0.00 |
| 8p#109753_109843  | 8  | 27642521-28492281   | 849761  | BK, SCARA5, AB075870, ELP3, PNOC, ZNF395, AK098    | 0   | 1 | 0.00 | 0.00 |
| 6q#86759_86789    | 6  | 71242696-71539084   | 296389  | KIAA1411, AB037832, C6orf57, SMAP1                 | Inf | 1 | 0.02 | 0.00 |
| 8p#107752_107793  | 8  | 2795154-3144098     | 348945  | CSMD1                                              | 0   | 1 | 0.00 | 0.00 |
| 8p#107842_107843  | 8  | 3581943-3589811     | 7869    | CSMD1                                              | 0   | 1 | 0.00 | 0.00 |
| 8p#108436_108475  | 8  | 11282316-11673472   | 391157  | 01563, C8orf13, BLK, AJ291678, AK097060, GATA4, NE | 0   | 1 | 0.00 | 0.00 |
| 6q#86683_86685    | 6  | 70448295-70468565   | 20271   | LMBRD1                                             | 0   | 1 | 0.00 | 0.00 |
| 6q#86790_86819    | 6  | 71546652-71890997   | 344346  | SMAP1, B3GAT2                                      | Inf | 1 | 0.02 | 0.00 |
| 6q#92306_92319    | 6  | 148743192-148877175 | 133984  | SASH1                                              | 0   | 1 | 0.00 | 0.00 |
| 6q#90117_90121    | 6  | 121036304-121165701 | 129398  |                                                    | 0   | 1 | 0.00 | 0.00 |
| 6q#90487_90528    | 6  | 126035173-126432819 | 397647  | 35066, BC036196, HEY2, NCOA7, AL834442, HINT3, C6  | 0   | 1 | 0.00 | 0.00 |
| 6q#90626_90630    | 6  | 127769119-127812016 | 42898   | KIAA0408                                           | 0   | 1 | 0.00 | 0.00 |
| 6q#91160_91165    | 6  | 133868442-133908133 | 39692   | EYA4, BC041459                                     | 0   | 1 | 0.00 | 0.00 |
| 6q#93068_93088    | 6  | 158371782-158534567 | 162786  | SYNJ2, SERAC1                                      | 0   | 1 | 0.00 | 0.00 |
| 9q#127630_127646  | 9  | 135377514-135535203 | 157690  | BC034752                                           | 0   | 1 | 0.00 | 0.00 |
| 8p#109191_109192  | 8  | 21952702-21957424   | 4723    | FGF17                                              | 0   | 1 | 0.00 | 0.00 |
| 8p#107844_107889  | 8  | 3600889-3699092     | 368204  | CSMD1                                              | 0   | 1 | 0.00 | 0.00 |
| 8p#107943_108032  | 8  | 4469031-6103232     | 1634202 | CSMD1                                              | 0   | 1 | 0.00 | 0.00 |
| 8p#108045_108046  | 8  | 6314990-6327454     | 12465   | MCPH1                                              | 0   | 1 | 0.00 | 0.00 |
| 8p#108423_108435  | 8  | 11182417-11272720   | 90304   | MTMR9, AJ301562, AJ301563                          | 0   | 1 | 0.00 | 0.00 |
| 8p#109571_109714  | 8  | 25707513-27319983   | 1612471 | 27, BNIP3L, PNMA2, AK092377, DPYSL2, ADRA1A, S8    | 0   | 1 | 0.00 | 0.00 |
| 8p#107720_107751  | 8  | 2360755-2787396     | 426642  | BC030605, AK128880, AB209502, CSMD1                | 0   | 1 | 0.00 | 0.00 |
| 9q#126724_126726  | 9  | 127638568-127650860 | 12293   | AY007211, FPGS                                     | 0   | 1 | 0.00 | 0.00 |
| 18p#201894_201898 | 18 | 14112462-14196283   | 83822   | ZNF519, AK092114                                   | 0   | 1 | 0.00 | 0.00 |
| 6q#92116_92238    | 6  | 146266512-147559939 | 1293428 | H, GRM1, RAB32, AK097570, AL832192, AK125216, BC   | 0   | 1 | 0.00 | 0.00 |
| 6q#92370_92377    | 6  | 149459143-149655040 | 195898  |                                                    | 0   | 1 | 0.00 | 0.00 |
| 6q#90290_90352    | 6  | 123773133-124442679 | 669547  | TRDN, AJ489257, TCBA1                              | 0   | 1 | 0.00 | 0.00 |
| 6q#90359_90486    | 6  | 124521619-126013641 | 1492023 | CB1, AL713649, AK122811, IBRDC1, TPD52L1, HDDC     | 0   | 1 | 0.00 | 0.00 |
| 6q#91088_91159    | 6  | 132997201-133860142 | 862942  | N1, VNN3, VNN2, C6orf192, RPS12, BC039371, LOC28   | 0   | 1 | 0.00 | 0.00 |
| 6q#86820_86823    | 6  | 71936550-72027604   | 91055   |                                                    | Inf | 1 | 0.02 | 0.00 |
| 6q#86855_86857    | 6  | 72186398-72199812   | 13415   | C6orf155, BC110999                                 | Inf | 1 | 0.02 | 0.00 |
| 8p#108047_108079  | 8  | 6335349-6572190     | 236842  | MCPH1, AGRAT5                                      | 0   | 1 | 0.00 | 0.00 |
| 8p#109186_109190  | 8  | 21924422-21949785   | 25364   | NPM2                                               | 0   | 1 | 0.00 | 0.00 |
| 8p#109414_109418  | 8  | 23601167-23638409   | 37243   |                                                    | 0   | 1 | 0.00 | 0.00 |
| 8p#109473_109504  | 8  | 24445499-24928891   | 483393  | NEF3, NEFL                                         | 0   | 1 | 0.00 | 0.00 |
| 8p#109506_109568  | 8  | 24974024-25661825   | 687802  | DOCK5, GNRH1, KCTD9, CDCA2, AK130123               | 0   | 1 | 0.00 | 0.00 |
| 8p#109715_109734  | 8  | 27326201-27495755   | 169555  | PTK2B, CHRNA2, EPHX2                               | 0   | 1 | 0.00 | 0.00 |
| 8p#109750_109751  | 8  | 27608848-27615693   | 6846    | AK092563                                           | 0   | 1 | 0.00 | 0.00 |
| 8p#107890_107942  | 8  | 3977295-4461648     | 484354  | CSMD1                                              | 0   | 1 | 0.00 | 0.00 |
| 9q#126727_126774  | 9  | 127655865-127954727 | 298863  | NAC6, ST6GALNAC4, PIP5KL1, DPM2, FAM102A, C9o      | 0   | 1 | 0.00 | 0.00 |
| 6q#86677_86682    | 6  | 70358095-70442859   | 84765   | LMBRD1                                             | 0   | 1 | 0.00 | 0.00 |
| 6q#92089_92115    | 6  | 146048948-146257015 | 208068  | EPM2A, AK124757, FLJ44955, FBXO30, SHPRH           | 0   | 1 | 0.00 | 0.00 |
| 6q#92663_92672    | 6  | 152371813-152537699 | 165887  | ESR1, BX640939, SYNE1                              | 0   | 1 | 0.00 | 0.00 |
| 6q#90353_90358    | 6  | 124453345-124505072 | 51728   | TCBA1                                              | 0   | 1 | 0.00 | 0.00 |
| 6q#92378_92401    | 6  | 149677122-149880194 | 203073  | MAP3K7IP2, AK090441, CR613874, PPIL4               | 0   | 1 | 0.00 | 0.00 |
| 6q#92673_92750    | 6  | 152548389-153377512 | 829124  | SYNE1, MYCT1, AK021612, VIP                        | 0   | 1 | 0.00 | 0.00 |
| 18p#201796_201797 | 18 | 13120190-13132646   | 12457   |                                                    | 0   | 1 | 0.00 | 0.00 |
| 18p#201798_201804 | 18 | 13167036-13230891   | 63856   | BC041855, C18orf1                                  | Inf | 1 | 0.02 | 0.00 |

|                   |    |                     |         |                                                   |     |   |      |      |
|-------------------|----|---------------------|---------|---------------------------------------------------|-----|---|------|------|
| 8p#109372_109413  | 8  | 23204278-23595343   | 391066  | R591817, LOXL2, BC034477, ENTPD4, SLC25A37, NKX1  | 0   | 1 | 0.00 | 0.00 |
| 8p#109569_109570  | 8  | 25680595-25697219   | 16625   | AK130123                                          | 0   | 1 | 0.00 | 0.00 |
| 8p#109419_109472  | 8  | 23656762-24440266   | 783505  | STC1, ADAM28, ADAMDEC1, ADAM7, BC043207           | 0   | 1 | 0.00 | 0.00 |
| 4p#56748_56761    | 4  | 39966852-40116066   | 149215  | N4BP2, RHOH                                       | 0   | 1 | 0.00 | 0.00 |
| 6q#92076_92088    | 6  | 145897597-146043184 | 145588  | EPM2A                                             | 0   | 1 | 0.00 | 0.00 |
| 6q#92402_92403    | 6  | 149890631-149897537 | 6907    | PPIL4                                             | 0   | 1 | 0.00 | 0.00 |
| 17p#194418_194426 | 17 | 14031025-14107200   | 76176   | COX10, BC017752                                   | 0   | 1 | 0.00 | 0.00 |
| 18q#201929_201943 | 18 | 16793851-16910108   | 116258  | ROCK1                                             | 0   | 1 | 0.00 | 0.00 |
| 17p#194427_194441 | 17 | 14124451-14309047   | 184597  | HS3ST3B1                                          | 0   | 1 | 0.00 | 0.00 |
| 10p#128882_128887 | 10 | 9761044-9888913     | 125870  | Inf                                               | Inf | 1 | 0.02 | 0.00 |
| 6p#85383_85393    | 6  | 47278531-47379050   | 100520  | TNFRSF21                                          | 0   | 1 | 0.00 | 0.00 |
| 6p#85482_85495    | 6  | 48454193-48935376   | 481184  |                                                   | 0   | 1 | 0.00 | 0.00 |
| 4p#54160_54165    | 4  | 1816323-1861898     | 45576   | LETM1, BC052254, WHSC1                            | 0   | 1 | 0.00 | 0.00 |
| 18q#201944_202044 | 18 | 16919560-17925678   | 1006119 | CK1, KIAA1772, ESCO1, SNRPD1, ABHD3, BC014186, I  | 0   | 1 | 0.00 | 0.00 |
| 4p#54167_54181    | 4  | 1879545-2018612     | 139068  | WHSC1, WHSC2                                      | 0   | 1 | 0.00 | 0.00 |
| 2p#24358_24376    | 2  | 63641769-63833319   | 191551  | LOC51057, MDH1                                    | 0   | 1 | 0.00 | 0.00 |
| 2p#24645_24711    | 2  | 67206391-68330669   | 1124279 | TAA16, BC028245, C1D, AK058090, LOC116143, LOC54  | 0   | 1 | 0.00 | 0.00 |
| 2p#24868_24889    | 2  | 69738986-69983003   | 244018  | AAK1, AB209457, ANXA4, GMCL1                      | 0   | 1 | 0.00 | 0.00 |
| 4q#66670_66719    | 4  | 182428449-183608282 | 1179834 | AF088005, AK056196, AK024300, AF195420            | 0   | 1 | 0.00 | 0.00 |
| 21q#220738_220760 | 21 | 43314482-43465598   | 151117  | PKNOX1, CBS, U2AF1, CRYAA                         | 0   | 1 | 0.00 | 0.00 |
| 4q#57715_57738    | 4  | 55313934-55678902   | 364969  | BC043566, KIT                                     | Inf | 1 | 0.02 | 0.00 |
| 6p#86225_86229    | 6  | 58261050-58401337   | 140288  | GUSBL2                                            | 0   | 1 | 0.00 | 0.00 |
| 6p#85496_85503    | 6  | 48961281-49196351   | 235071  |                                                   | 0   | 1 | 0.00 | 0.00 |
| 18q#202045_202063 | 18 | 17945381-18248612   | 303232  | AK123079, GATA6, X95701, CTAGE1                   | 0   | 1 | 0.00 | 0.00 |
| 2q#33084_33088    | 2  | 184748257-184884905 | 136649  |                                                   | 0   | 1 | 0.00 | 0.00 |
| 22q#223599_223625 | 22 | 35709715-35852133   | 142419  | C35206, TST, MPST, KCTD17, TmprSS6, AY358398, IL  | 0   | 1 | 0.00 | 0.00 |
| 4p#54182_54185    | 4  | 2025970-2046661     | 20692   | FLJ37478, POLN                                    | 0   | 1 | 0.00 | 0.00 |
| 4p#54249_54261    | 4  | 2815841-2906779     | 90939   | BC022996, SH3BP2, ADD1                            | 0   | 1 | 0.00 | 0.00 |
| 4q#66662_66669    | 4  | 182207266-182409177 | 201912  | AF088005                                          | 0   | 1 | 0.00 | 0.00 |
| 21q#220709_220737 | 21 | 43087629-43310084   | 222456  | DR4, AK056041, NDUJF3, BC005107, AK024918, PKNC   | 0   | 1 | 0.00 | 0.00 |
| 22q#223589_223598 | 22 | 35639794-35706169   | 66376   | BC070085, CSF2RB                                  | 0   | 1 | 0.00 | 0.00 |
| 22q#223626_223630 | 22 | 35856497-35881761   | 25265   | IL2RB                                             | 0   | 1 | 0.00 | 0.00 |
| 6p#86205_86210    | 6  | 57620628-57648080   | 27453   | PRIM2A                                            | 0   | 1 | 0.00 | 0.00 |
| 2p#22337_22349    | 2  | 38304314-38463957   | 159644  | MGC34824, BC039050, ARL6IP2                       | 0   | 1 | 0.00 | 0.00 |
| 2p#24712_24724    | 2  | 68339548-68436596   | 97049   | PPP3R1, AY183476, AY144596, C2orf32               | 0   | 1 | 0.00 | 0.00 |
| 2p#24862_24867    | 2  | 69690778-69730207   | 39430   | AAK1                                              | 0   | 1 | 0.00 | 0.00 |
| 2p#25516_25630    | 2  | 75959564-78173520   | 2213957 | AK122612, LRRTM4, BC030125                        | 0   | 1 | 0.00 | 0.00 |
| 2p#25671_25681    | 2  | 78745308-79059699   | 314392  |                                                   | 0   | 1 | 0.00 | 0.00 |
| 2p#20458_20743    | 2  | 14867514-19959130   | 5091617 | M49A, VSNL1, SMC6L1, FLJ40869, BC035863, KCNS3,   | 0   | 1 | 0.00 | 0.00 |
| 6p#85504_85516    | 6  | 49231488-49482167   | 250680  |                                                   | 0   | 1 | 0.00 | 0.00 |
| 2p#20319_20382    | 2  | 11944311-12853833   | 909523  | AK001558, BC039108, TRIB2                         | 0   | 1 | 0.00 | 0.00 |
| 2p#21050_21075    | 2  | 24435619-24793202   | 357584  | ITSN2, AK026273, NCOA1                            | 0   | 1 | 0.00 | 0.00 |
| 6p#85605_85611    | 6  | 50582022-50735078   | 153057  | CR592675                                          | 0   | 1 | 0.00 | 0.00 |
| 2p#20383_20389    | 2  | 12867106-13069860   | 202755  | AK123120                                          | 0   | 1 | 0.00 | 0.00 |
| 4q#63575_63594    | 4  | 139044849-139482728 | 437880  | BC042886, BC040999, SLC7A11                       | 0   | 1 | 0.00 | 0.00 |
| 4q#65622_65647    | 4  | 166308236-166535436 | 227201  | TRIM60, FLJ38482, KLHL2                           | 0   | 1 | 0.00 | 0.00 |
| 22q#223631_223658 | 22 | 35891343-36050179   | 158837  | C1QTNF6, AK128125, SSTR3, RAC2, PSCD4             | 0   | 1 | 0.00 | 0.00 |
| 22q#223702_223741 | 22 | 36359074-36546253   | 187180  | AK126873, PDXP, LGALS1, MGC3731, DQ278603, TR     | 0   | 1 | 0.00 | 0.00 |
| 22q#224845_224880 | 22 | 44874040-45079672   | 205633  | A, LOC150383, PKDREJ, FLJ20699, GTSE1, TRMU, CE   | 0   | 1 | 0.00 | 0.00 |
| 22q#224886_224893 | 22 | 45121943-45177725   | 55783   | CELSR1                                            | 0   | 1 | 0.00 | 0.00 |
| 22q#225377_225388 | 22 | 49413635-49509153   | 95519   | BC045765, AB051437, ACR, MGC70863                 | 0   | 1 | 0.00 | 0.00 |
| 22q#224881_224885 | 22 | 45087304-45112953   | 25650   | CELSR1                                            | 0   | 1 | 0.00 | 0.00 |
| 2p#19673_19693    | 2  | 3222551-3444177     | 221627  | ALLC                                              | 0   | 1 | 0.00 | 0.00 |
| 2p#19724_19810    | 2  | 3944989-5046384     | 1101396 | BC047589, TSSC1, TTC15, ADI1                      | 0   | 1 | 0.00 | 0.00 |
| 2p#19811_19941    | 2  | 5055882-7869575     | 2813694 | 32, FLJ41046, BC044918, FLJ42418, LOC129607, RSA4 | 0   | 1 | 0.00 | 0.00 |

|                   |    |                     |         |                                                   |             |   |      |      |
|-------------------|----|---------------------|---------|---------------------------------------------------|-------------|---|------|------|
| 2p#19942_19984    | 2  | 7902039-8421620     | 519582  | BC043361, BC043563, LOC339789                     | 0           | 1 | 0.00 | 0.00 |
| 2p#19985_20001    | 2  | 8432176-8773444     | 341269  | BX641130, ID2                                     | 0           | 1 | 0.00 | 0.00 |
| 2p#20390_20457    | 2  | 13088643-14806151   | 1717509 | 3120, CR614284, BC035112, AY928977, FAM84A, AK09  | 0           | 1 | 0.00 | 0.00 |
| 2p#21711_21848    | 2  | 30141881-31765794   | 1623914 | YCAT, CAPN13, GALNT14, AL713663, AK092257, EHD3   | 0           | 1 | 0.00 | 0.00 |
| 2p#22048_22060    | 2  | 33733799-33903907   | 170109  | FAM98A                                            | 0           | 1 | 0.00 | 0.00 |
| 2p#22061_22336    | 2  | 33941976-38290535   | 4348560 | BC040851, SUL16B1, AY289773, BC065768, CEBPZ, A   | 0           | 1 | 0.00 | 0.00 |
| 2p#22350_22616    | 2  | 38474956-42012383   | 3537428 | MOPT, AK123375, SOS1, CDKL4, MAP4K3, BC042073, A  | 0           | 1 | 0.00 | 0.00 |
| 2p#22617_22622    | 2  | 42022278-42083619   | 61342   | BC047907                                          | 0           | 1 | 0.00 | 0.00 |
| 2p#25465_25515    | 2  | 75303894-75951697   | 647804  | TACR1, FLJ13391, MRPL19, C2orf3                   | 0           | 1 | 0.00 | 0.00 |
| 2p#25883_25891    | 2  | 81030999-81400122   | 369124  |                                                   | 0           | 1 | 0.00 | 0.00 |
| 2p#25892_25909    | 2  | 81421591-81783963   | 362373  |                                                   | 0           | 1 | 0.00 | 0.00 |
| 2p#25910_26044    | 2  | 81810809-84994098   | 3183290 | 55, SUCLG1, FLJ37357, U61736, BC015442, AB051484, | 0           | 1 | 0.00 | 0.00 |
| 2q#33089_33125    | 2  | 184896349-185350464 | 454116  | AF315091, C2orf10                                 | 0           | 1 | 0.00 | 0.00 |
| 2q#33126_33158    | 2  | 185356361-185709196 | 352836  | C2orf10                                           | 0           | 1 | 0.00 | 0.00 |
| 2q#33289_33375    | 2  | 187985210-189231644 | 1246435 | CALCRL, TFPI, CR618142, GULP1                     | 0           | 1 | 0.00 | 0.00 |
| 2q#33376_33434    | 2  | 189240520-190120239 | 879720  | GULP1, DIRC1, COL3A1, COL5A2                      | 0           | 1 | 0.00 | 0.00 |
| 2q#33576_33657    | 2  | 191703887-192689325 | 985439  | AT1, STAT4, MYO1B, OBFC2A, AK130181, SDPR, TMEI   | 0           | 1 | 0.00 | 0.00 |
| 6p#85517_85563    | 6  | 49494429-49898560   | 404132  | K126371, C6orf141, RHAG, CRISP2, AK126282, CRISP3 | 0           | 1 | 0.00 | 0.00 |
| 6p#85564_85604    | 6  | 49910953-50570749   | 659797  | SP1, BC028577, DEFB114, DEFB110, DEFB112, CR592   | 0           | 1 | 0.00 | 0.00 |
| 6p#85612_85791    | 6  | 50772248-52803157   | 2030910 | 17A, IL17F, MCM3, PAQR8, EFHC1, TRAM2, AK095117   | 0           | 1 | 0.00 | 0.00 |
| 21q#221043_221123 | 21 | 45136971-45694357   | 557387  | 170, BC036902, BC027456, BC004343, ADARB1, AF426  | 0           | 1 | 0.00 | 0.00 |
| 22q#223659_223701 | 22 | 36056231-36355279   | 299049  | 1FNG, BC051720, CARD10, CDC42EP1, LGALS2, AK173   | 0           | 1 | 0.00 | 0.00 |
| 22q#223742_223821 | 22 | 36549481-37075881   | 526401  | 2F, AK094034, SOX10, AK124758, PICK1, SLC16A8, BA | 0           | 1 | 0.00 | 0.00 |
| 22q#223822_223846 | 22 | 37082820-37227248   | 144429  | U61101, AK092269, KCNJ4, KDELR3, DDX17            | 0           | 1 | 0.00 | 0.00 |
| 12q#156049_156082 | 12 | 58891105-59849186   | 958082  |                                                   | 0           | 1 | 0.00 | 0.00 |
| 14q#177856_177858 | 14 | 105609466-105630148 | 20683   | LOC652848                                         | Inf         | 1 | 0.02 | 0.00 |
| 7p#98223_98267    | 7  | 45737633-46857567   | 1119935 | AF119858                                          | 0           | 1 | 0.00 | 0.00 |
| 7q#106673_106685  | 7  | 149992558-150088808 | 96251   | ABP1, KCNHD                                       | 0           | 1 | 0.00 | 0.00 |
| 7q#106599_106672  | 7  | 149437384-14990479  | 553096  | GIMAP8, GIMAP7, GIMAP4, GIMAP6, GIMAP2, CR6081    | 0           | 1 | 0.00 | 0.00 |
| 7q#106744_106809  | 7  | 150406845-150959130 | 552286  | YREN18, LOC349136, AK095986, BC043605, CRYGN, R   | 0           | 1 | 0.00 | 0.00 |
| 5p#67480_67485    | 5  | 607274-647823       | 40550   | AF251188                                          | 0           | 1 | 0.00 | 0.00 |
| 5p#67486_67493    | 5  | 654179-714208       | 60030   | AF251188, Cep72, TPPP                             | 0           | 1 | 0.00 | 0.00 |
| 17q#195944_195946 | 17 | 30647014-30687866   | 40853   |                                                   | Inf         | 1 | 0.02 | 0.00 |
| 11q#144925_144934 | 11 | 66460753-66540649   | 79897   | PC, AK024280                                      | 1.044194198 | 1 | 0.05 | 0.05 |
| 11q#144935_144939 | 11 | 66545630-66574841   | 29212   | AK024280, SYT12                                   | 0.686886232 | 1 | 0.03 | 0.05 |
| 11q#144921_144924 | 11 | 66425910-66454424   | 28515   | PC                                                | 1.413401461 | 1 | 0.07 | 0.05 |
| 17q#196174_196188 | 17 | 33103030-33242217   | 139188  | TCF2                                              | Inf         | 1 | 0.02 | 0.00 |
| 17q#195810_195824 | 17 | 29186416-29326607   | 140192  | ACCN1                                             | 0           | 1 | 0.00 | 0.00 |
| 17q#196091_196092 | 17 | 32319140-32333913   | 14774   |                                                   | 0.692294348 | 1 | 0.02 | 0.02 |
| 17q#196087_196090 | 17 | 32221174-32295670   | 74497   |                                                   | 0.692294348 | 1 | 0.02 | 0.02 |
| 17q#196093_196122 | 17 | 32354376-32624485   | 270110  | LHX1, AATF, ACACA                                 | 0.692294348 | 1 | 0.02 | 0.02 |
| 17q#196123_196136 | 17 | 32631171-32749708   | 118538  | ACACA                                             | 0.692294348 | 1 | 0.02 | 0.02 |
| 20q#214744_214766 | 20 | 29297270-29454941   | 157672  | DEFB115, DEFB118, DEFB119                         | 0           | 1 | 0.00 | 0.00 |
| 5q#70805_70835    | 5  | 52607229-53020103   | 412875  | FST, NDUFS4                                       | 0           | 1 | 0.00 | 0.00 |
| 5q#70793_70804    | 5  | 52422451-52584276   | 161826  | ITGA2, MOCS2, AK097893                            | 0           | 1 | 0.00 | 0.00 |
| 5q#70772_70792    | 5  | 52241970-52418550   | 176581  | ITGA1, ITGA2                                      | 0           | 1 | 0.00 | 0.00 |
| 17q#195081_195095 | 17 | 22775124-22907242   | 132119  | U43586, KSR1                                      | 0.686886232 | 1 | 0.03 | 0.05 |
| 17q#196073_196082 | 17 | 31984772-32056457   | 71686   | ZNF403, MGC4172, MRM1                             | 0           | 1 | 0.00 | 0.00 |
| 20q#214768_214781 | 20 | 29462577-29548916   | 86340   | AF479700, AY122474, DEFB123, DEFB124, REM1        | 0           | 1 | 0.00 | 0.00 |
| 20q#214869_214874 | 20 | 30242293-30267582   | 25290   | PLAGL2, POFUT1                                    | 0           | 1 | 0.00 | 0.00 |
| 20q#214875_214931 | 20 | 30274523-30779593   | 505071  | AL122043, C20orf112, AK097804, BC023657, LOC1499  | 0           | 1 | 0.00 | 0.00 |
| 16p#187912_187934 | 16 | 20240233-20454588   | 214356  | GP2, JM0D, PDILT, FLJ20581, LOC123876             | 1.398928118 | 1 | 0.03 | 0.02 |
| 16p#187935_187944 | 16 | 20471437-20616154   | 144718  | ACSM2, ACSM1                                      | 1.398928118 | 1 | 0.03 | 0.02 |
| 16p#186068_186078 | 16 | 340652-387016       | 46365   | AXIN1, MRPL28, TME8, BC028568, CR595773           | 0.692294348 | 1 | 0.02 | 0.02 |
| 12q#156092_156118 | 12 | 60080023-60553839   | 473817  | FAM19A2                                           | Inf         | 1 | 0.02 | 0.00 |

|                   |    |                     |         |                                                  |             |   |      |      |
|-------------------|----|---------------------|---------|--------------------------------------------------|-------------|---|------|------|
| 7p#97716_97740    | 7  | 40021815-40218122   | 196308  | C7orf10                                          | 0           | 1 | 0.00 | 0.00 |
| 7q#106867_106871  | 7  | 151549860-151573746 | 23887   | MLL3, CR621082                                   | 0           | 1 | 0.00 | 0.00 |
| 7p#97877_97998    | 7  | 42236645-43692609   | 1455965 | L32, HECW1, AL049342, STK17A, AK023053, FLJ10803 | 0           | 1 | 0.00 | 0.00 |
| 12q#155962_156001 | 12 | 57255690-57921366   | 665677  | AK093124, LRIG3                                  | 0           | 1 | 0.00 | 0.00 |
| 12q#157000_157024 | 12 | 70574871-70900694   | 325824  | TBC1D15, TPH2                                    | 0.692294348 | 1 | 0.02 | 0.02 |
| 12q#157063_157097 | 12 | 71235217-71977191   | 741975  | TRHDE                                            | 0.692294348 | 1 | 0.02 | 0.02 |
| 12q#157184_157200 | 12 | 73858003-74027792   | 169790  | KCNC2, AK093193, CAPS2                           | 0.692294348 | 1 | 0.02 | 0.02 |
| 7q#99928_99954    | 7  | 73935333-74963877   | 1028545 | BC002581, PMS2L3, HIP1                           | 0           | 1 | 0.00 | 0.00 |
| 7q#106872_106874  | 7  | 151582346-151608937 | 26592   |                                                  | 0           | 1 | 0.00 | 0.00 |
| 7q#102079_102093  | 7  | 99590278-99673037   | 82760   | PILRB, G30875, PILRA, ZCWPW1, BCDIN3             | 0           | 1 | 0.00 | 0.00 |
| 7q#102188_102225  | 7  | 100289076-100475392 | 186317  | SERPINE1, AP1S1, VGF, FLJ39237, MOGAT3, PLOD3,   | 0           | 1 | 0.00 | 0.00 |
| 7q#99710_99737    | 7  | 71447664-71845796   | 398133  | BC068520, POM121                                 | 0           | 1 | 0.00 | 0.00 |
| 7q#99738_99757    | 7  | 72145065-72309840   | 164776  | FKBP6, BAZ1B                                     | 0           | 1 | 0.00 | 0.00 |
| 7q#99758_99762    | 7  | 72314166-72348206   | 34041   | BAZ1B                                            | 0           | 1 | 0.00 | 0.00 |
| 7q#107113_107177  | 7  | 154890035-155543038 | 653004  | AK091942, BC011923, PRR8, RBM33, SHH             | 0           | 1 | 0.00 | 0.00 |
| 7q#107492_107498  | 7  | 158543578-158618042 | 74465   |                                                  | 0           | 1 | 0.00 | 0.00 |
| 12q#157152_157183 | 12 | 73192322-73841902   | 649581  | KCNC2                                            | 0.692294348 | 1 | 0.02 | 0.02 |
| 12q#161834_161838 | 12 | 131337505-131358965 | 21461   | GALNT9, AK055773                                 | 0           | 1 | 0.00 | 0.00 |
| 16p#187658_187661 | 16 | 16183557-16189888   | 6332    | ABCC6                                            | Inf         | 1 | 0.02 | 0.00 |
| 5p#67455_67456    | 5  | 399277-409281       | 10005   | AHRR                                             | 0           | 1 | 0.00 | 0.00 |
| 5p#67607_67633    | 5  | 1749947-1976546     | 226600  | MRPL36, NDUFS6, IRX4, BC039383                   | 0           | 1 | 0.00 | 0.00 |
| 5p#67542_67546    | 5  | 1176967-1212917     | 35951   |                                                  | 0           | 1 | 0.00 | 0.00 |
| 5p#67534_67541    | 5  | 1109693-1163662     | 53970   | SLC12A7                                          | 0           | 1 | 0.00 | 0.00 |
| 11q#145017_145020 | 11 | 67110297-67130661   | 20365   | GSTP1, C11orf72                                  | 0.686886232 | 1 | 0.03 | 0.05 |
| 20q#214782_214783 | 20 | 29557170-29564743   | 7574    |                                                  | 0           | 1 | 0.00 | 0.00 |
| 20q#215136_215137 | 20 | 32629586-32639947   | 10362   | CDC91L1                                          | 0           | 1 | 0.00 | 0.00 |
| 1q#10461_10463    | 1  | 143603866-143699091 | 95226   | AF379624, AF419616                               | Inf         | 1 | 0.02 | 0.00 |
| 20q#215165_215183 | 20 | 32886539-33025895   | 139357  | GGTL3, ACSS2, GSS                                | 0           | 1 | 0.00 | 0.00 |
| 1q#10554_10568    | 1  | 144609277-144966209 | 356933  | AF419616, GPR89A, FLJ39739                       | Inf         | 1 | 0.02 | 0.00 |
| 5p#67457_67479    | 5  | 417108-601131       | 184024  | AHRR, AB033060, AF251188, EXOC3, SLC9A3          | 0           | 1 | 0.00 | 0.00 |
| 5p#67635_67655    | 5  | 1994560-2252849     | 258290  |                                                  | 0           | 1 | 0.00 | 0.00 |
| 11q#144890_144895 | 11 | 66189604-66220971   | 31368   | RBM4B, SPTBN2                                    | 1.044194198 | 1 | 0.05 | 0.05 |
| 11q#144883_144889 | 11 | 66147400-66185199   | 37800   | RBM14, TMEEM137, AK126761, RBM4                  | 1.044194198 | 1 | 0.05 | 0.05 |
| 11q#144917_144920 | 11 | 66393580-66414050   | 20471   | PC                                               | 1.413401461 | 1 | 0.07 | 0.05 |
| 12q#156046_156048 | 12 | 58765949-58842286   | 76338   |                                                  | 0           | 1 | 0.00 | 0.00 |
| 7p#97999_98010    | 7  | 43696076-43773074   | 76999   | URG4, UBE2D4, BX537878                           | 0           | 1 | 0.00 | 0.00 |
| 7p#98157_98158    | 7  | 44870567-44876800   | 6234    | CCM2                                             | 0           | 1 | 0.00 | 0.00 |
| 7p#98173_98222    | 7  | 44997028-45733479   | 736452  | RAMP3, ADCY1, AL832059, CR624698, IGFBP1, IGFBP  | 0           | 1 | 0.00 | 0.00 |
| 7q#99898_99912    | 7  | 73425153-73528079   | 102927  | LOC442582                                        | 0           | 1 | 0.00 | 0.00 |
| 12q#156035_156044 | 12 | 58485533-58709003   | 223471  |                                                  | 0           | 1 | 0.00 | 0.00 |
| 16q#191081_191082 | 16 | 69417987-69424016   | 6030    | AL137259                                         | 0           | 1 | 0.00 | 0.00 |
| 14q#170098_170102 | 14 | 21958644-21993843   | 35200   | BC063432                                         | 0           | 1 | 0.00 | 0.00 |
| 7p#98159_98172    | 7  | 44885528-44988904   | 103377  | CCM2, AK096229, AB002361, TBRG4, RAMP3           | 0           | 1 | 0.00 | 0.00 |
| 7q#99885_99897    | 7  | 73336839-73419914   | 83076   | LOC442582                                        | 0           | 1 | 0.00 | 0.00 |
| 7q#99913_99927    | 7  | 73535047-73930477   | 395431  | LOC442582, WBSCR16                               | 0           | 1 | 0.00 | 0.00 |
| 3q#51060_51078    | 3  | 163997236-164251630 | 254395  | BC019327                                         | 0           | 1 | 0.00 | 0.00 |
| 7q#99763_99786    | 7  | 72357881-72487475   | 129595  | BAZ1B, BCL7B, TBL2, MLXIPL                       | 0           | 1 | 0.00 | 0.00 |
| 7q#99787_99884    | 7  | 72494206-73328261   | 834056  | CLDN3, CLDN4, WBSCR27, WBSCR28, ELN, LIMK1, W    | 0           | 1 | 0.00 | 0.00 |
| 14q#174399_174438 | 14 | 70303363-70729379   | 426017  | MAP3K9, AK096500, PCNX                           | 0           | 1 | 0.00 | 0.00 |
| 14q#174071_174088 | 14 | 67522999-67653859   | 130861  | RAD51L1                                          | 0           | 1 | 0.00 | 0.00 |
| 14q#174135_174142 | 14 | 68033522-68094037   | 60516   | RAD51L1                                          | 0           | 1 | 0.00 | 0.00 |
| 7p#98885_98891    | 7  | 55891299-55914821   | 23523   | PSPH, CCT6A, SUMF2                               | 0           | 1 | 0.00 | 0.00 |
| 14q#177891_177894 | 14 | 105962305-105985517 | 23213   | AK125079                                         | 0           | 1 | 0.00 | 0.00 |
| 14q#170564_170603 | 14 | 26766506-27739732   | 973227  | BX538140, BC043425                               | 0           | 1 | 0.00 | 0.00 |
| 14q#170423_170426 | 14 | 24180739-24282763   | 102025  |                                                  | 0           | 1 | 0.00 | 0.00 |



|                   |    |                     |         |                                                   |  |     |   |      |      |
|-------------------|----|---------------------|---------|---------------------------------------------------|--|-----|---|------|------|
| 14q#170540_170545 | 14 | 26258473-26375750   | 117278  |                                                   |  | 0   | 1 | 0.00 | 0.00 |
| 14q#170604_170609 | 14 | 27760739-27908686   | 147948  |                                                   |  | 0   | 1 | 0.00 | 0.00 |
| 19p#208872_208884 | 19 | 20621912-20776633   | 154722  | ZNF626, BC067843, AK131420                        |  | 0   | 1 | 0.00 | 0.00 |
| 7q#99529_99530    | 7  | 69547629-69560312   | 12684   | AUTS2                                             |  | 0   | 1 | 0.00 | 0.00 |
| 17p#194814_194820 | 17 | 19083766-19141363   | 57598   | EPN2                                              |  | 0   | 1 | 0.00 | 0.00 |
| 18q#202995_203015 | 18 | 30598575-30790392   | 191818  | DTNA                                              |  | 0   | 1 | 0.00 | 0.00 |
| 10p#128123_128136 | 10 | 899657-1020185      | 120529  | LARP5, AK130873                                   |  | 0   | 1 | 0.00 | 0.00 |
| 14q#170546_170562 | 14 | 26401312-26736467   | 335156  |                                                   |  | 0   | 1 | 0.00 | 0.00 |
| 19q#211800_211827 | 19 | 58451334-58687515   | 236182  | LOC91661, BC017357, AK055464, LOC147804, BC10     |  | Inf | 1 | 0.02 | 0.00 |
| 12q#161866_161881 | 12 | 131669440-131808636 | 139197  | AY945262, AB046765, P2RX2                         |  | 0   | 1 | 0.00 | 0.00 |
| 7p#98946_98948    | 7  | 56615553-57020362   | 404810  |                                                   |  | 0   | 1 | 0.00 | 0.00 |
| 7q#99531_99542    | 7  | 69574837-69678160   | 103324  | AUTS2                                             |  | 0   | 1 | 0.00 | 0.00 |
| 14q#170427_170468 | 14 | 24314763-24787018   | 472256  | AL834346, STXBP6                                  |  | 0   | 1 | 0.00 | 0.00 |
| 14q#170484_170499 | 14 | 25217808-25627778   | 409971  |                                                   |  | 0   | 1 | 0.00 | 0.00 |
| 11q#144460_144461 | 11 | 63471535-63478067   | 6533    | NAT11                                             |  | Inf | 1 | 0.02 | 0.00 |
| 11q#144462_144471 | 11 | 63484761-63533092   | 48332   | COX8A, OTUB1, LRP16                               |  | Inf | 1 | 0.02 | 0.00 |
| 10p#128163_128176 | 10 | 1204216-1311028     | 106813  | ADARB2                                            |  | 0   | 1 | 0.00 | 0.00 |
| 10p#128185_128187 | 10 | 1386766-1401416     | 14651   | ADARB2                                            |  | 0   | 1 | 0.00 | 0.00 |
| 10p#128194_128215 | 10 | 1467995-1655741     | 187747  | ADARB2                                            |  | 0   | 1 | 0.00 | 0.00 |
| 14q#170469_170483 | 14 | 24793808-25196793   | 402986  |                                                   |  | 0   | 1 | 0.00 | 0.00 |
| 14q#170500_170502 | 14 | 25654837-25718646   | 63810   |                                                   |  | 0   | 1 | 0.00 | 0.00 |
| 14q#170131_170171 | 14 | 22280271-22494175   | 213905  | MRPL52, MMP14, LRP10, FLJ38964, BC106012, RBM23   |  | 0   | 1 | 0.00 | 0.00 |
| 12q#161864_161865 | 12 | 131654094-131661554 | 7461    | AY945262                                          |  | 0   | 1 | 0.00 | 0.00 |
| 6p#86178_86180    | 6  | 57342153-57362475   | 20323   | PRIM2A                                            |  | 0   | 1 | 0.00 | 0.00 |
| 19q#211666_211678 | 19 | 57280916-57395032   | 114117  | AK131409, BC032805, ZNF616, AK131308, PPP2R1A     |  | Inf | 1 | 0.02 | 0.00 |
| 19q#211703_211799 | 19 | 57628348-58446689   | 818342  | MF468, ZNF320, MGC35402, LOC125893, ZNF702, FLJ3  |  | Inf | 1 | 0.02 | 0.00 |
| 19q#211828_211873 | 19 | 58697319-58977777   | 280459  | AK098813, ZNF331, DPRX                            |  | Inf | 1 | 0.02 | 0.00 |
| 10p#128177_128184 | 10 | 1316962-1378345     | 61384   | ADARB2                                            |  | 0   | 1 | 0.00 | 0.00 |
| 14q#170172_170191 | 14 | 22498715-22584727   | 86013   | AY927599, JUB, C14orf93, CR607514, PSMB5          |  | 0   | 1 | 0.00 | 0.00 |
| 12q#161859_161863 | 12 | 131586968-131639384 | 52417   |                                                   |  | 0   | 1 | 0.00 | 0.00 |
| 6p#86195_86203    | 6  | 57527846-57597885   | 70040   | PRIM2A                                            |  | 0   | 1 | 0.00 | 0.00 |
| 6p#85963_85973    | 6  | 54881542-55079019   | 197478  | FAM83B                                            |  | 0   | 1 | 0.00 | 0.00 |
| 19q#211638_211665 | 19 | 57081941-57270123   | 188183  | BC014606, ZNF350, ZNF615, ZNF614, AB018341, ZNF   |  | Inf | 1 | 0.02 | 0.00 |
| 10p#128216_128238 | 10 | 1669807-1912336     | 242530  | ADARB2                                            |  | 0   | 1 | 0.00 | 0.00 |
| 14q#170192_170223 | 14 | 22589130-22839103   | 249974  | C14orf119, CEBPE, SLC7A8, KIAA1443, BC045733, BC0 |  | 0   | 1 | 0.00 | 0.00 |
| 12q#161204_161211 | 12 | 123316593-123373729 | 57137   | FAM101A, NCOR2                                    |  | 0   | 1 | 0.00 | 0.00 |
| 12q#161842_161848 | 12 | 131430339-131475425 | 45087   | AK055773, AB040672                                |  | 0   | 1 | 0.00 | 0.00 |
| 11q#144540_144543 | 11 | 63934113-63975564   | 41452   | AK094364                                          |  | 0   | 1 | 0.00 | 0.00 |
| 11q#144561_144577 | 11 | 64170732-64288919   | 118188  | NRXN2, RASGRP2, PYGM, SF1                         |  | 0   | 1 | 0.00 | 0.00 |
| 11q#144586_144593 | 11 | 64323701-64361174   | 37474   | MAP4K2, MEN1, CDC42BPG                            |  | 0   | 1 | 0.00 | 0.00 |
| 11q#144544_144560 | 11 | 63985447-64162947   | 177501  | SLC22A11, SLC22A12, NRXN2                         |  | 0   | 1 | 0.00 | 0.00 |
| 18q#205645_205695 | 18 | 65706554-66222735   | 516182  | CD226, RTTN, SOCS6                                |  | 0   | 1 | 0.00 | 0.00 |
| 18q#205494_205496 | 18 | 63481146-63515711   | 34566   | BC053410                                          |  | 0   | 1 | 0.00 | 0.00 |
| 18q#205751_205882 | 18 | 67627281-70170023   | 2542743 | 2, NETO1, BC034583, BC071801, FBXO15, C18orf55, C |  | 0   | 1 | 0.00 | 0.00 |
| 3q#48150_48153    | 3  | 128133869-128161948 | 28080   | CHCHD6                                            |  | 0   | 1 | 0.00 | 0.00 |
| 3q#48163_48166    | 3  | 128243424-128252627 | 9204    |                                                   |  | 0   | 1 | 0.00 | 0.00 |
| 12q#154432_154482 | 12 | 45153451-45901678   | 748228  | BC014370, SLC38A4, AMIGO2, BC072670, FAM113B      |  | 0   | 1 | 0.00 | 0.00 |
| 12q#154483_154499 | 12 | 45907121-46349009   | 441889  | FAM113B, FLJ21908                                 |  | 0   | 1 | 0.00 | 0.00 |
| 12q#155086_155106 | 12 | 50842460-50974503   | 132044  | 01, BC033114, BC038743, BC039104, KRT7, AJ238246  |  | 0   | 1 | 0.00 | 0.00 |
| 12q#155122_155169 | 12 | 51073081-51314889   | 241809  | 5, KRT6B, KRT6A, KRT5, M21389, KRT6IRS, K6IRS4, K |  | 0   | 1 | 0.00 | 0.00 |
| 12q#155427_155460 | 12 | 53097661-53328368   | 230708  | K222845, FAM112B, NCKAP1L, PDE1B, PPP1R1A, LAC    |  | 0   | 1 | 0.00 | 0.00 |
| 12q#157725_157730 | 12 | 81348469-81398821   | 50353   | C12orf26                                          |  | 0   | 1 | 0.00 | 0.00 |
| 12q#157731_157745 | 12 | 81416567-81668260   | 251694  | TMTC2                                             |  | 0   | 1 | 0.00 | 0.00 |
| 12q#157746_157828 | 12 | 81680444-83588174   | 1907731 | TMTC2, BC041966                                   |  | 0   | 1 | 0.00 | 0.00 |
| 12q#158743_158744 | 12 | 97389198-97396846   | 7649    | AK126817                                          |  | 0   | 1 | 0.00 | 0.00 |

|                   |    |                     |         |                                                  |  |             |   |      |      |
|-------------------|----|---------------------|---------|--------------------------------------------------|--|-------------|---|------|------|
| 12q#158745_158746 | 12 | 97402135-97413416   | 11282   | TMPO                                             |  | 0           | 1 | 0.00 | 0.00 |
| 12q#160731_160830 | 12 | 119250393-119959443 | 709051  | COQ5, RNF10, POP5, CABP1, KIAA0152, AK126367, A  |  | 0           | 1 | 0.00 | 0.00 |
| 12q#160905_160921 | 12 | 120643785-120756990 | 113206  | 568, RHOF, AK096174, BC038786, CR598662, AB02899 |  | 0           | 1 | 0.00 | 0.00 |
| 12q#161043_161089 | 12 | 121846432-122219529 | 373098  | ABCB9, OGFOD2, ARL6IP4, PITPNM2, AB040890, X98   |  | 0           | 1 | 0.00 | 0.00 |
| 12q#161212_161216 | 12 | 123387978-123401074 | 13097   | NCOR2                                            |  | 0           | 1 | 0.00 | 0.00 |
| 12q#161849_161857 | 12 | 131488972-131560821 | 71850   | AB040672                                         |  | 0           | 1 | 0.00 | 0.00 |
| 14q#170224_170269 | 14 | 22843491-23088268   | 244778  | MN1, SLC22A17, EFS, IL17E, CMTM5, MYH6, MYH7, AK |  | 0           | 1 | 0.00 | 0.00 |
| 18q#205497_205511 | 18 | 63538950-63708273   | 169324  | BC053410                                         |  | 0           | 1 | 0.00 | 0.00 |
| 18q#205696_205736 | 18 | 66244758-67255780   | 1011023 | AY262164                                         |  | 0           | 1 | 0.00 | 0.00 |
| 18q#205883_205927 | 18 | 70187311-70541250   | 353940  | 019628, CNDP2, CNDP1, LOC400657, AK056288, ZNF-  |  | 0           | 1 | 0.00 | 0.00 |
| 17q#195947_195968 | 17 | 30695295-30887596   | 192302  | SLFN11, SLFN12, SLFN13, AK172761                 |  | Inf         | 1 | 0.02 | 0.00 |
| 17q#195969_195980 | 17 | 30901797-30953456   | 51660   | PEX12, AP2B1                                     |  | 0           | 1 | 0.00 | 0.00 |
| 17q#195835_195844 | 17 | 29432404-29533631   | 101228  | ACCN1, BC062794                                  |  | Inf         | 1 | 0.02 | 0.00 |
| 17q#196167_196173 | 17 | 33042292-33093677   | 51386   | AP1GBP1, DDX52                                   |  | 0.692294348 | 1 | 0.02 | 0.02 |
| 17q#195825_195828 | 17 | 29337434-29363564   | 26131   | ACCN1                                            |  | 0           | 1 | 0.00 | 0.00 |
| 16p#187662_187667 | 16 | 16199682-16679871   | 480190  | ABCC6                                            |  | Inf         | 1 | 0.02 | 0.00 |
| 16p#186501_186502 | 16 | 3159477-3167953     | 8477    | ABCC6                                            |  | 1.398928118 | 1 | 0.03 | 0.02 |
| 16p#186121_186125 | 16 | 660107-679505       | 19399   | RHOT2, RHBDL1, STUB1, WDR24                      |  | 0.692294348 | 1 | 0.02 | 0.02 |
| 17q#196194_196195 | 17 | 33726698-33728168   | 1471    | MRPL45                                           |  | 1.398928118 | 1 | 0.03 | 0.02 |
| 17q#196154_196157 | 17 | 32920242-32942120   | 21879   | DUSP14                                           |  | 0.692294348 | 1 | 0.02 | 0.02 |
| 17q#196196_196202 | 17 | 33732520-33787164   | 54645   | MRPL45, GPR179, SOCS7                            |  | 1.398928118 | 1 | 0.03 | 0.02 |
| 17q#196060_196070 | 17 | 31897238-31966048   | 68811   | ZNHIT3, MYOHD1, PIGW                             |  | 0           | 1 | 0.00 | 0.00 |
| 17q#196203_196204 | 17 | 33794970-33805693   | 10724   | SOCS7                                            |  | 1.398928118 | 1 | 0.03 | 0.02 |
| 17q#196137_196153 | 17 | 32761352-32911382   | 150031  | ACACA, TADA2L, AK096371                          |  | 0.692294348 | 1 | 0.02 | 0.02 |
| 5p#67423_67430    | 5  | 75149-166885        | 91737   |                                                  |  | 0           | 1 | 0.00 | 0.00 |
| 7q#106686_106689  | 7  | 150093361-150097479 | 4119    | KCNH2                                            |  | 0           | 1 | 0.00 | 0.00 |
| 7q#106690_106692  | 7  | 150103400-150113408 | 10009   | KCNH2                                            |  | 0           | 1 | 0.00 | 0.00 |
| 7q#106716_106721  | 7  | 150223093-150255433 | 32341   | CENTG3                                           |  | 0           | 1 | 0.00 | 0.00 |
| 7q#106722_106743  | 7  | 150261842-150395163 | 13322   | CENTG3, ASB10, ABCF2, CSG1cA-T, SMARCD3          |  | 0           | 1 | 0.00 | 0.00 |
| 5q#70733_70749    | 5  | 51512135-52005235   | 493101  |                                                  |  | 0           | 1 | 0.00 | 0.00 |
| 5q#70750_70753    | 5  | 52022330-52097360   | 75031   |                                                  |  | 0           | 1 | 0.00 | 0.00 |
| 16p#187774_187857 | 16 | 18816699-19535016   | 718318  | SYT17, AY358232, BX640722, BC070101, TMC5, MIR1  |  | 1.398928118 | 1 | 0.03 | 0.02 |
| 16p#186126_186133 | 16 | 682624-724711       | 42088   | FBXL16, C16orf24, C16orf25, NARFL                |  | 0.692294348 | 1 | 0.02 | 0.02 |
| 16p#187655_187657 | 16 | 16157049-16174807   | 17759   | ABCC6                                            |  | Inf         | 1 | 0.02 | 0.00 |
| 4q#59770_59849    | 4  | 84152888-84884145   | 731258  | 4, COPS4, PLAC8, COQ2, AF155510, HPSE, HEL308, M |  | 0           | 1 | 0.00 | 0.00 |
| 11p#143360_143383 | 11 | 50027176-50335378   | 308203  | BC067889, AB231717                               |  | 0           | 1 | 0.00 | 0.00 |
| 11p#143300_143307 | 11 | 48979065-49065556   | 86492   |                                                  |  | 0           | 1 | 0.00 | 0.00 |
| 1p#1550_1556      | 1  | 16757397-16833762   | 76366   | AK130020                                         |  | 0           | 1 | 0.00 | 0.00 |
| 1q#16664_16679    | 1  | 212821407-212992850 | 171444  | USH2A                                            |  | 0.692294348 | 1 | 0.02 | 0.02 |
| 1q#16579_16581    | 1  | 211795590-211841250 | 45661   | KCNK2                                            |  | 0.686886232 | 1 | 0.03 | 0.05 |
| 1q#10458_10460    | 1  | 143565999-143586695 | 20697   | AF379624                                         |  | Inf         | 1 | 0.02 | 0.00 |
| 5p#67433_67454    | 5  | 191387-390197       | 198811  | KIAA1909, LOC133957, SDHA, PDCD6, AHRR           |  | 0           | 1 | 0.00 | 0.00 |
| 5p#67511_67533    | 5  | 905462-1103606      | 198145  | BRD9, TRIP13, AK126199, NKD2, SLC12A7            |  | 0           | 1 | 0.00 | 0.00 |
| 5p#67547_67584    | 5  | 1222073-1525687     | 303615  | SLC6A18, TERT, CRR9, BC034612, AK127466, SLC6A   |  | 0           | 1 | 0.00 | 0.00 |
| 5p#67601_67605    | 5  | 1685230-1723827     | 38598   | BC045555                                         |  | 0           | 1 | 0.00 | 0.00 |
| 5p#67587_67597    | 5  | 1552577-1619554     | 66978   | AYTL2                                            |  | 0           | 1 | 0.00 | 0.00 |
| 5p#67585_67586    | 5  | 1536518-1543921     | 7404    | AYTL2                                            |  | 0           | 1 | 0.00 | 0.00 |
| 5p#67598_67600    | 5  | 1643202-1659626     | 16425   | BC045555                                         |  | 0           | 1 | 0.00 | 0.00 |
| 11q#145014_145016 | 11 | 67098983-67109289   | 10307   | GSTP1                                            |  | 0.686886232 | 1 | 0.03 | 0.05 |
| 14q#177917_177918 | 14 | 106212061-106216785 | 4725    | Z47244                                           |  | 0           | 1 | 0.00 | 0.00 |
| 17p#195028_195035 | 17 | 21654696-21759405   | 104710  | AK127995, CR616400                               |  | 0           | 1 | 0.00 | 0.00 |
| 12q#155941_155961 | 12 | 56649182-57237888   | 588707  |                                                  |  | 0           | 1 | 0.00 | 0.00 |
| 14q#170511_170522 | 14 | 25973380-26049821   | 76442   | NOVA1                                            |  | 0           | 1 | 0.00 | 0.00 |
| 19q#211913_211926 | 19 | 59294758-59358344   | 63587   | SCAR, NDUFA3, TFPT, PRPF31, CNOT3, LENG1, TMC    |  | Inf         | 1 | 0.02 | 0.00 |
| 3q#45640_45673    | 3  | 97631362-98180589   | 549228  | AK092565                                         |  | 0           | 1 | 0.00 | 0.00 |

|                   |    |                     |         |                                                   |  |             |   |      |      |
|-------------------|----|---------------------|---------|---------------------------------------------------|--|-------------|---|------|------|
| 3q#45689_45712    | 3  | 98333982-98526530   | 192549  | AK092565                                          |  | 0           | 1 | 0.00 | 0.00 |
| 14q#170112_170113 | 14 | 22081092-22086438   | 5347    | BC063432                                          |  | 0           | 1 | 0.00 | 0.00 |
| 12q#157025_157028 | 12 | 70920968-70951089   | 30122   | AK123250, AK095156                                |  | 0.692294348 | 1 | 0.02 | 0.02 |
| 3q#45713_45738    | 3  | 98539725-98774146   | 234422  | BC031881                                          |  | 0           | 1 | 0.00 | 0.00 |
| 3q#46251_46406    | 3  | 105247720-108342376 | 3094657 | ALCAM, CBLB, BC036229                             |  | 0           | 1 | 0.00 | 0.00 |
| 14q#171853_171858 | 14 | 43906178-44004786   | 98609   |                                                   |  | 0           | 1 | 0.00 | 0.00 |
| 19q#211886_211912 | 19 | 59076848-59283858   | 207011  | AB209671, CACNG7, CACNG8, AK131287, CACNG6, L     |  | Inf         | 1 | 0.02 | 0.00 |
| 19q#211927_211948 | 19 | 59361468-59497108   | 135641  | MC4, LENG4, TSEN34, RPS9, AK095055, LILRB3, LILR4 |  | Inf         | 1 | 0.02 | 0.00 |
| 12q#155933_155933 | 12 | 56534042-5658412    | 51371   | BC032840                                          |  | 0           | 1 | 0.00 | 0.00 |
| 19q#211949_211966 | 19 | 59502178-59618024   | 115847  | LILRA5, LILRA4, LAIR1, AK097869, AF315098         |  | Inf         | 1 | 0.02 | 0.00 |
| 19q#211982_211988 | 19 | 59734192-59774670   | 40479   | AF315098, LENG12                                  |  | 0           | 1 | 0.00 | 0.00 |
| 7q#107472_107477  | 7  | 158253281-158314830 | 61550   | BC013024                                          |  | 0           | 1 | 0.00 | 0.00 |
| 7q#107478_107490  | 7  | 158326714-158427693 | 100980  | VIPR2                                             |  | 0           | 1 | 0.00 | 0.00 |
| 12q#155499_155557 | 12 | 53714941-54157201   | 442261  | OR6C3, OR6C70                                     |  | 0           | 1 | 0.00 | 0.00 |
| 12q#161839_161840 | 12 | 131364161-131371184 | 7024    | AK055773                                          |  | 0           | 1 | 0.00 | 0.00 |
| 8p#108706_108725  | 8  | 15280126-15542864   | 262739  | TUSC3                                             |  | 0           | 1 | 0.00 | 0.00 |
| 9q#125391_125394  | 9  | 113443211-113464593 | 21383   | AK056275                                          |  | 0           | 1 | 0.00 | 0.00 |
| 8p#109924_109942  | 8  | 29281419-29673866   | 392448  | BC003524, BC082237                                |  | 0           | 1 | 0.00 | 0.00 |
| 8p#108726_108749  | 8  | 15552685-15957359   | 404675  | TUSC3, AK022085                                   |  | 0           | 1 | 0.00 | 0.00 |
| 19p#208831_208832 | 19 | 20001470-20009611   | 8142    | AK096571                                          |  | 0           | 1 | 0.00 | 0.00 |
| 8p#108695_108705  | 8  | 14911637-15231200   | 319564  | SGCZ                                              |  | 0           | 1 | 0.00 | 0.00 |
| 8p#107693_107699  | 8  | 1989140-2051320     | 62181   | MYOM2                                             |  | 0           | 1 | 0.00 | 0.00 |
| 8p#107706_107711  | 8  | 2145922-2219697     | 73776   |                                                   |  | 0           | 1 | 0.00 | 0.00 |
| 6q#87309_87313    | 6  | 78154564-78228889   | 74326   | HTR1B                                             |  | 0           | 1 | 0.00 | 0.00 |
| 9q#125395_125396  | 9  | 113477324-113502239 | 24916   |                                                   |  | 0           | 1 | 0.00 | 0.00 |
| 6q#86948_86956    | 6  | 73385434-73454938   | 69505   | KCNQ5                                             |  | 0           | 1 | 0.00 | 0.00 |
| 19p#208821_208830 | 19 | 19896223-19996289   | 100067  | ZNF93, AK127015, ZNF682, AK096571                 |  | 0           | 1 | 0.00 | 0.00 |
| 8p#107700_107705  | 8  | 2058919-2121457     | 62539   | MYOM2, AY156957                                   |  | 0           | 1 | 0.00 | 0.00 |
| 8p#108678_108693  | 8  | 14691731-14842050   | 150320  | SGCZ                                              |  | 0           | 1 | 0.00 | 0.00 |
| 14q#177869_177877 | 14 | 105754664-105818349 | 63686   | LOC652848                                         |  | 0           | 1 | 0.00 | 0.00 |
| 6q#87067_87095    | 6  | 74436180-74768401   | 332222  | CD109                                             |  | 0           | 1 | 0.00 | 0.00 |
| 19p#208851_208852 | 19 | 20306423-20319524   | 13102   | AF338193                                          |  | 0           | 1 | 0.00 | 0.00 |
| 19p#208885_208890 | 19 | 20792989-20900198   | 107210  | CR612655, ZNF85                                   |  | 0           | 1 | 0.00 | 0.00 |
| 6q#86933_86947    | 6  | 73147323-73375939   | 228617  | RIMS1, AB051866                                   |  | 0           | 1 | 0.00 | 0.00 |
| 6q#87303_87308    | 6  | 77911423-78115123   | 203701  |                                                   |  | 0           | 1 | 0.00 | 0.00 |
| 19p#208811_208820 | 19 | 19784301-19884844   | 100544  | BC034920, ZNF253, ZNF93                           |  | 0           | 1 | 0.00 | 0.00 |
| 6q#87096_87097    | 6  | 74827202-74857203   | 30002   | AF086303                                          |  | 0           | 1 | 0.00 | 0.00 |
| 6q#87115_87123    | 6  | 75126250-75205595   | 79346   | AF086303                                          |  | 0           | 1 | 0.00 | 0.00 |
| 6q#87283_87288    | 6  | 77305307-77426364   | 121058  |                                                   |  | 0           | 1 | 0.00 | 0.00 |
| 6q#87300_87302    | 6  | 77794343-77867869   | 73527   |                                                   |  | 0           | 1 | 0.00 | 0.00 |
| 19p#208866_208871 | 19 | 20575842-20617362   | 41521   | CR749233                                          |  | 0           | 1 | 0.00 | 0.00 |
| 14q#177866_177868 | 14 | 105724107-105742854 | 18748   | LOC652848                                         |  | 0           | 1 | 0.00 | 0.00 |
| 19p#208960_208962 | 19 | 21791460-21827308   | 35849   | ZNF43, BC017035                                   |  | 0           | 1 | 0.00 | 0.00 |
| 10p#128930_128979 | 10 | 10955395-11458832   | 503438  | BC033338, CUGBP2                                  |  | Inf         | 1 | 0.02 | 0.00 |
| 10p#129017_129142 | 10 | 11917499-13080456   | 1162958 | UPF2, DHTKD1, AB046850, SEC61A2, NUDT5, C10orf    |  | Inf         | 1 | 0.02 | 0.00 |
| 10p#129204_129212 | 10 | 13692139-13756261   | 64123   | PRPF18, BC002572, FRMD4A                          |  | Inf         | 1 | 0.02 | 0.00 |
| 18q#204003_204057 | 18 | 44456688-44968326   | 511639  | KIAA0427, SMAD7, CR621005, DYM                    |  | 0           | 1 | 0.00 | 0.00 |
| 18q#204207_204222 | 18 | 46495400-46625508   | 130109  | MAPK4, MRO, BC029860                              |  | 0           | 1 | 0.00 | 0.00 |
| 18q#204545_204600 | 18 | 51059651-51715751   | 656101  | TCF4, BC031056, BC043263                          |  | 0           | 1 | 0.00 | 0.00 |
| 4q#67131_67138    | 4  | 187697942-187764251 | 66310   | BC034307                                          |  | 0           | 1 | 0.00 | 0.00 |
| 4q#67393_67402    | 4  | 190918394-191046079 | 127686  |                                                   |  | 0           | 1 | 0.00 | 0.00 |
| 18q#203090_203251 | 18 | 31566422-33105797   | 1539376 | STAT1P1, BC009735, MOCOS, FHOD3, C18orf10, KIAA   |  | 0           | 1 | 0.00 | 0.00 |
| 18q#203280_203321 | 18 | 33381005-34504247   | 1123243 | BRUNOL4                                           |  | 0           | 1 | 0.00 | 0.00 |
| 12q#159229_159305 | 12 | 102472724-103154163 | 681440  | BC033128, HSP90B1, BC044618, TDG, GLT8D2, AK056   |  | 0           | 1 | 0.00 | 0.00 |
| 18q#203252_203279 | 18 | 33115298-33368643   | 253346  | BRUNOL4                                           |  | 0           | 1 | 0.00 | 0.00 |

|                   |    |                     |         |                                                    |  |  |     |   |      |      |
|-------------------|----|---------------------|---------|----------------------------------------------------|--|--|-----|---|------|------|
| 18q#203322_203331 | 18 | 34530034-34824147   | 294114  |                                                    |  |  | 0   | 1 | 0.00 | 0.00 |
| 18q#203385_203596 | 18 | 35747449-39686825   | 3939377 | 4625, AY762618, PIK3C3, BC011527, BC040725, BC02   |  |  | 0   | 1 | 0.00 | 0.00 |
| 18q#204058_204084 | 18 | 44979779-45226182   | 246404  | DYM                                                |  |  | 0   | 1 | 0.00 | 0.00 |
| 18q#204178_204206 | 18 | 46156249-46480763   | 324515  | C18orf24, MAPK4                                    |  |  | 0   | 1 | 0.00 | 0.00 |
| 18q#204390_204439 | 18 | 48918023-49319739   | 401717  | DCC                                                |  |  | 0   | 1 | 0.00 | 0.00 |
| 18q#204601_204645 | 18 | 51725803-52512937   | 787135  | BC043263, FLJ45743, TXNL1, WDR7                    |  |  | 0   | 1 | 0.00 | 0.00 |
| 19p#208806_208809 | 19 | 19724242-19758454   | 34213   | BC034236, BC034920                                 |  |  | 0   | 1 | 0.00 | 0.00 |
| 19p#208963_208964 | 19 | 21847506-21867647   | 20142   | AB062076                                           |  |  | 0   | 1 | 0.00 | 0.00 |
| 6q#87111_87114    | 6  | 75076119-75111778   | 35660   | AF086303                                           |  |  | 0   | 1 | 0.00 | 0.00 |
| 6q#87124_87137    | 6  | 75217814-75407689   | 189876  | AF086303                                           |  |  | 0   | 1 | 0.00 | 0.00 |
| 6q#87289_87299    | 6  | 77463870-7750243    | 286374  |                                                    |  |  | 0   | 1 | 0.00 | 0.00 |
| 18q#204223_204270 | 18 | 46633439-47149829   | 516391  | ME2, ELAC1, SMAD4, RKHD2                           |  |  | 0   | 1 | 0.00 | 0.00 |
| 18q#204328_204364 | 18 | 48360517-48693251   | 332735  | DCC                                                |  |  | 0   | 1 | 0.00 | 0.00 |
| 4q#66736_66750    | 4  | 183739693-183969559 | 129867  | AF195420                                           |  |  | 0   | 1 | 0.00 | 0.00 |
| 10p#128644_128653 | 10 | 6364659-6478223     | 113565  | AK128185                                           |  |  | Inf | 1 | 0.02 | 0.00 |
| 4q#66726_66735    | 4  | 183660448-183733452 | 73005   | AF195420                                           |  |  | 0   | 1 | 0.00 | 0.00 |
| 2p#26393_26401    | 2  | 89712785-89929475   | 216691  | Z68978, AY942022                                   |  |  | 0   | 1 | 0.00 | 0.00 |
| 12q#159844_159934 | 12 | 108956615-109812362 | 855748  | D1C, C12orf24, AK130510, VPS29, RAD9B, PPTCT7, FLJ |  |  | 0   | 1 | 0.00 | 0.00 |
| 12q#160155_160157 | 12 | 111937965-111964933 | 26969   | DTX1                                               |  |  | 0   | 1 | 0.00 | 0.00 |
| 12q#160226_160233 | 12 | 112669268-112740678 | 71411   | AK096932, AB014582, RBM19                          |  |  | 0   | 1 | 0.00 | 0.00 |
| 18q#203597_203608 | 18 | 39703954-40050225   | 346272  |                                                    |  |  | 0   | 1 | 0.00 | 0.00 |
| 18q#202301_202302 | 18 | 20865594-20877278   | 11685   |                                                    |  |  | 0   | 1 | 0.00 | 0.00 |
| 18q#204085_204102 | 18 | 45237889-45372585   | 134697  | DYM, LOC497661, RPL17, LIPG                        |  |  | 0   | 1 | 0.00 | 0.00 |
| 18q#204144_204177 | 18 | 45864401-46151967   | 287567  | AB032945, CCDC11, MBD1, CXXC1                      |  |  | 0   | 1 | 0.00 | 0.00 |
| 18q#204365_204389 | 18 | 48698719-48911197   | 212479  | DCC                                                |  |  | 0   | 1 | 0.00 | 0.00 |
| 19p#208797_208805 | 19 | 19655009-19716580   | 61572   | AK123904, ZNF14, FLJ46230                          |  |  | 0   | 1 | 0.00 | 0.00 |
| 12q#159306_159344 | 12 | 103171281-103552780 | 381500  | AY057105, TXNRD1, CHST11                           |  |  | 0   | 1 | 0.00 | 0.00 |
| 7q#101570_101574  | 7  | 94512027-94546226   | 34200   | PPP1R9A                                            |  |  | 0   | 1 | 0.00 | 0.00 |
| 4q#67150_67153    | 4  | 187863004-187893915 | 30912   | FAT                                                |  |  | 0   | 1 | 0.00 | 0.00 |
| 12q#159699_159843 | 12 | 107625929-108949213 | 1323285 | ACACB, FOXN4, AK094906, KCTD10, UBE3B, MMAB,       |  |  | 0   | 1 | 0.00 | 0.00 |
| 12q#160158_160225 | 12 | 111976632-112657762 | 681131  | orf52, IQCD, TPCN1, AB032995, SLC24A6, LOC196463,  |  |  | 0   | 1 | 0.00 | 0.00 |
| 12q#160234_160241 | 12 | 112746772-112813602 | 66831   | RBM19                                              |  |  | 0   | 1 | 0.00 | 0.00 |
| 18q#202094_202149 | 18 | 18824967-19332543   | 507577  | RBBP8, AK093243, CABLES1, C18orf45, RIOK3          |  |  | 0   | 1 | 0.00 | 0.00 |
| 18q#204103_204143 | 18 | 45377886-45855753   | 477868  | ACAA2, AK123464, AB032945                          |  |  | 0   | 1 | 0.00 | 0.00 |
| 12q#159935_159997 | 12 | 109817671-110383263 | 565593  | MYL2, AJ276555, CUTL2, FAM109A, LNK, ATXN2         |  |  | 0   | 1 | 0.00 | 0.00 |
| 4q#64754_64826    | 4  | 154048482-154835865 | 787384  | RFIP1, BC039551, KIAA1727, BC011052, TRIM2, MND1,  |  |  | 0   | 1 | 0.00 | 0.00 |
| 4q#64858_64878    | 4  | 155227132-155583970 | 356839  | DCHS2                                              |  |  | 0   | 1 | 0.00 | 0.00 |
| 4q#64983_64984    | 4  | 156795435-156842879 | 47445   |                                                    |  |  | 0   | 1 | 0.00 | 0.00 |
| 4q#65826_65908    | 4  | 169333759-170148733 | 814975  | ANXA10, FLJ20035, AL832950, CR9333601, PALLD       |  |  | 0   | 1 | 0.00 | 0.00 |
| 19p#208793_208796 | 19 | 19639317-19649858   | 10542   | ZNF101                                             |  |  | 0   | 1 | 0.00 | 0.00 |
| 12q#154930_155015 | 12 | 49602544-50199669   | 597126  | LETMD1, C12orf22, TFCP2, U03495, POU6F1, DAZAP2,   |  |  | 0   | 1 | 0.00 | 0.00 |
| 12q#155035_155060 | 12 | 50409195-50613261   | 204067  | 8A, AK091315, LOC401720, CR936697, ANKRD33, ACV    |  |  | 0   | 1 | 0.00 | 0.00 |
| 1p#3989_4012      | 1  | 41667210-41854193   | 186984  | HIVEP3                                             |  |  | 0   | 1 | 0.00 | 0.00 |
| 6p#86013_86054    | 6  | 55508203-56073913   | 565711  | HMGCLL1, BMP5, COL21A1                             |  |  | 0   | 1 | 0.00 | 0.00 |
| 12q#158275_158389 | 12 | 91304852-92696137   | 1391286 | LOC338809, FLJ46688, EEA1, NUDT4, UBE2N, MRPL4     |  |  | 0   | 1 | 0.00 | 0.00 |
| 12q#158404_158411 | 12 | 92991698-93077794   | 86097   | PLXNC1                                             |  |  | 0   | 1 | 0.00 | 0.00 |
| 12q#158423_158455 | 12 | 93184452-93596530   | 412079  | PLXNC1, CCDC41, TMCC3                              |  |  | 0   | 1 | 0.00 | 0.00 |
| 12q#159345_159698 | 12 | 103565551-107620358 | 4054808 | C033542, POLR3B, RFX4, RIC8B, C12orf23, MTERFD3,   |  |  | 0   | 1 | 0.00 | 0.00 |
| 7q#101575_101580  | 7  | 94553898-94598694   | 44797   | PPP1R9A, PON1                                      |  |  | 0   | 1 | 0.00 | 0.00 |
| 4q#63803_63848    | 4  | 141957640-142366258 | 408619  | TBC1D9, RNF150                                     |  |  | 0   | 1 | 0.00 | 0.00 |
| 4q#63901_64048    | 4  | 143241597-145136258 | 1894662 | 649090, USP38, GAB1, SMARCA5, AL157495, AX72128    |  |  | 0   | 1 | 0.00 | 0.00 |
| 4q#64067_64202    | 4  | 145380699-147224446 | 1843748 | 6339, ANAPC10, ABCE1, OTUD4, BC035666, SMAD1, C    |  |  | 0   | 1 | 0.00 | 0.00 |
| 4q#65819_65825    | 4  | 169079347-169294678 | 215332  |                                                    |  |  | 0   | 1 | 0.00 | 0.00 |
| 4q#64879_64982    | 4  | 155591458-156767195 | 1175738 | 5GB, FGA, FGG, AK056234, DQ266889, LRAT, MGC270    |  |  | 0   | 1 | 0.00 | 0.00 |
| 4q#65909_65970    | 4  | 170159734-170336047 | 676314  | PALLD, CBR4, SH3RF1, NEK1                          |  |  | 0   | 1 | 0.00 | 0.00 |

|                   |    |                     |         |                                                   |             |   |      |      |
|-------------------|----|---------------------|---------|---------------------------------------------------|-------------|---|------|------|
| 4q#65971_65980    | 4  | 170851539-170931943 | 80405   | NEK1, CLCN3                                       |             | 1 | 0.02 | 0.00 |
| 4q#65981_66013    | 4  | 170946783-171321035 | 374253  | LCN3, G36553, FLJ20534, AK125042, AB014526, MFAP  |             | 1 | 0.00 | 0.00 |
| 19p#208791_208792 | 19 | 19631525-19633685   | 2161    | ATP13A1                                           |             | 1 | 0.00 | 0.00 |
| 22q#224843_224844 | 22 | 44859790-44867997   | 8208    | PPARA                                             |             | 1 | 0.00 | 0.00 |
| 1p#3934_3954      | 1  | 41003485-41180704   | 177220  | CTPS, SLFNL1, AL157461, SCMH1                     |             | 1 | 0.00 | 0.00 |
| 1p#4013_4152      | 1  | 41862292-43297210   | 1434919 | AL832217, FLJ20972, PPIH, AF086102, YBX1, CLDN19, |             | 1 | 0.00 | 0.00 |
| 1p#4244_4265      | 1  | 44030821-44148716   | 117896  | 3, ARTN, IPO13, DPH2, ATP6V0B, B4GALT2, CCDC24,   |             | 1 | 0.00 | 0.00 |
| 1p#4357_4385      | 1  | 45002442-45239145   | 236704  | EIF2B3, HECTD3, UROD, AB040944                    |             | 1 | 0.00 | 0.00 |
| 2p#22726_22783    | 2  | 43205161-43795376   | 590216  | ZFP36L2, BC032412, THADA, PLEKHH2                 |             | 1 | 0.00 | 0.00 |
| 2p#22784_22838    | 2  | 43807207-44329864   | 522658  | IH2, AK096400, DYNC2L1, ABCG5, ABCG8, LRPPRC, I   |             | 1 | 0.00 | 0.00 |
| 4q#64049_64066    | 4  | 145143997-145380758 | 236762  | GYPE, BC029578, GYPB, S77893                      |             | 1 | 0.00 | 0.00 |
| 4q#64203_64210    | 4  | 147240957-147421723 | 180767  |                                                   |             | 1 | 0.00 | 0.00 |
| 6p#85986_86012    | 6  | 55245525-55501058   | 255534  | HCRTR2, UNQ9356, HMGCLL1                          |             | 1 | 0.00 | 0.00 |
| 12q#154643_154674 | 12 | 47507352-47676698   | 169347  | 23, RND1, CCDC65, FKBP11, AK098529, ARF3, WNT10   |             | 1 | 0.00 | 0.00 |
| 12q#154703_154725 | 12 | 47851757-48000003   | 148247  | 979, TUBA3, CR624182, TUBA6, AK098083, PRPH, AK   |             | 1 | 0.00 | 0.00 |
| 12q#154726_154913 | 12 | 48004455-49455722   | 1451268 | 283331, AK055142, LOC144233, FAIM2, BC034605, AQ  |             | 1 | 0.00 | 0.00 |
| 12q#158456_158474 | 12 | 93633612-93853452   | 219841  |                                                   |             | 1 | 0.00 | 0.00 |
| 12q#158501_158523 | 12 | 94095336-94233315   | 137980  | FGD6, AK001338, VEZT, CR590554                    |             | 1 | 0.00 | 0.00 |
| 12q#158905_158931 | 12 | 98870746-99101282   | 230537  | ANKS1B, KIAA0701, GOLGA2L1, ACTR6                 |             | 1 | 0.00 | 0.00 |
| 12q#159998_160039 | 12 | 110389164-110743393 | 354230  | ATXN2, BRAP, ACAD10, ALDH2, C12orf47              |             | 1 | 0.00 | 0.00 |
| 12q#160520_160693 | 12 | 116887878-118981868 | 2093991 | AOK3, SUDS3, KIAA1853, CR595298, HSPB8, AK05749   |             | 1 | 0.00 | 0.00 |
| 12q#161091_161146 | 12 | 122237134-122644202 | 407069  | O1, BC030544, SETD8, MGC7036, U1SNRNPBP, FLJ39    |             | 1 | 0.00 | 0.00 |
| 12q#161147_161171 | 12 | 122654935-122869656 | 214722  | GTF2H3, C12orf38, ATP6V0A2, DNAH10, AB095937      |             | 1 | 0.00 | 0.00 |
| 12q#161222_161223 | 12 | 123456670-123463336 | 6667    | NCOR2                                             |             | 1 | 0.00 | 0.00 |
| 12q#161224_161230 | 12 | 123472282-123530088 | 57807   | NCOR2, AF125672                                   |             | 1 | 0.00 | 0.00 |
| 12q#161231_161242 | 12 | 123537749-123757822 | 220074  | AF125672, AB209089                                |             | 1 | 0.00 | 0.00 |
| 12q#161243_161251 | 12 | 123769603-123848046 | 78444   | SCARB1                                            |             | 1 | 0.00 | 0.00 |
| 12q#161252_161261 | 12 | 123856557-123929821 | 73265   | SCARB1, AF515445, UBC                             |             | 1 | 0.00 | 0.00 |
| 21q#220205_220217 | 21 | 39141318-39229893   | 88576   | FLJ45139                                          |             | 1 | 0.00 | 0.00 |
| 21q#220256_220401 | 21 | 39584392-40710914   | 1126523 | WRB, CR600902, C21orf13, SH3BGR, AY372061, C21of  |             | 1 | 0.00 | 0.00 |
| 21q#220402_220461 | 21 | 40717881-41090392   | 372512  | DSCAM                                             |             | 1 | 0.00 | 0.00 |
| 1q#10464_10466    | 1  | 143725788-143755693 | 29906   | AF419616                                          |             | 1 | 0.02 | 0.00 |
| 1q#10507_10546    | 1  | 144198177-144558419 | 360243  | AF419616, BCL9, ACP6, GJA5                        |             | 1 | 0.02 | 0.00 |
| 1q#10569_10570    | 1  | 144975464-145012632 | 37169   | FLJ39739                                          |             | 1 | 0.02 | 0.00 |
| 1q#15375_15387    | 1  | 199087690-199222360 | 134671  | PPP1R12B                                          | 1.398928118 | 1 | 0.03 | 0.02 |
| 18p#200981_201086 | 18 | 3682344-4983795     | 1301452 | DLGAP1, BC039546, BC040718, AK098180, Y12726      |             | 1 | 0.00 | 0.00 |
| 18p#201162_201178 | 18 | 5932446-6092850     | 160405  | AK091075, L3MBTL4                                 |             | 1 | 0.00 | 0.00 |
| 18p#200640_200647 | 18 | 207389-255539       | 48151   | THOC1                                             |             | 1 | 0.00 | 0.00 |
| 6q#89405_89455    | 6  | 110760400-111280651 | 520252  | AK127146, DDO, SLC22A16, CDC2L6                   |             | 1 | 0.00 | 0.00 |
| 18p#201179_201190 | 18 | 6102403-6202799     | 100397  | L3MBTL4                                           |             | 1 | 0.00 | 0.00 |
| 6q#88241_88269    | 6  | 91610500-92579195   | 968696  | BC037927                                          |             | 1 | 0.00 | 0.00 |
| 18p#200648_200659 | 18 | 260154-353293       | 93140   | AK097544, COLEC12                                 |             | 1 | 0.00 | 0.00 |
| 18p#200787_200810 | 18 | 1683081-2010912     | 327832  | BC040589                                          |             | 1 | 0.00 | 0.00 |
| 18p#201233_201264 | 18 | 6837549-7070108     | 232560  | ARHGAP28, AK097613, LAMA1                         |             | 1 | 0.00 | 0.00 |
| 6q#87791_87883    | 6  | 85693301-87684665   | 1991365 | NT5E, SNX14, AB209098, SYNCRIP, CR624925          |             | 1 | 0.00 | 0.00 |
| 9q#126685_126695  | 9  | 127347161-127432039 | 84879   | C9orf88                                           |             | 1 | 0.00 | 0.00 |
| 6q#88238_88240    | 6  | 91474978-91550288   | 75311   |                                                   |             | 1 | 0.00 | 0.00 |
| 6q#90159_90165    | 6  | 121788231-121831554 | 43324   | GJA1                                              | 0.692294348 | 1 | 0.02 | 0.00 |
| 18p#201265_201281 | 18 | 7075833-7372338     | 296506  | LAMA1                                             |             | 1 | 0.00 | 0.00 |
| 6q#86737_86740    | 6  | 70987208-71018683   | 31476   | COL9A1                                            | Inf         | 1 | 0.02 | 0.00 |
| 6q#87756_87774    | 6  | 84960035-85383618   | 423584  | KIAA1009                                          |             | 1 | 0.00 | 0.00 |
| 9q#126696_126699  | 9  | 127449761-127475848 | 26088   | STXBP1                                            |             | 1 | 0.00 | 0.00 |
| 17p#192968_192973 | 17 | 625576-651788       | 26213   | C17orf25, RNMTL1, AF151908, NXN                   |             | 1 | 0.00 | 0.00 |
| 6q#93496_93501    | 6  | 162769733-162812830 | 43098   | PARK2                                             |             | 1 | 0.00 | 0.00 |
| 6q#93423_93478    | 6  | 162083771-162596023 | 512253  | PARK2                                             |             | 1 | 0.00 | 0.00 |

|                   |    |                     |         |                                                                                                      |             |   |      |      |
|-------------------|----|---------------------|---------|------------------------------------------------------------------------------------------------------|-------------|---|------|------|
| 6q#93692_93878    | 6  | 165749653-167460246 | 1710594 | 3_MGC35308, SFT2D1, AK095077, BRP44L, RPS6KA2, #00566, BC057385, FAM101B, AK123107, BC040223, VCSMD1 | 0           | 1 | 0.00 | 0.00 |
| 17p#192920_192942 | 17 | 245006-436332       | 191327  |                                                                                                      | 0           | 1 | 0.00 | 0.00 |
| 8p#107828_107837  | 8  | 3470621-3546756     | 76136   |                                                                                                      | 0           | 1 | 0.00 | 0.00 |
| 6q#91729_91730    | 6  | 141338162-141374567 | 36406   |                                                                                                      | Inf         | 1 | 0.02 | 0.00 |
| 6q#92980_92989    | 6  | 156939028-157200168 | 261141  | ARID1B                                                                                               | 0           | 1 | 0.00 | 0.00 |
| 6q#93110_93167    | 6  | 158795713-159324613 | 528901  | TULP4, AB037844, DYNLT1, SYTL3, VIL2, LOC202459                                                      | 0           | 1 | 0.00 | 0.00 |
| 6q#93246_93342    | 6  | 160227731-161199723 | 971993  | 2R, SLC22A1, CR618035, SLC22A2, SLC22A3, AK1259                                                      | 0           | 1 | 0.00 | 0.00 |
| 6q#93983_94112    | 6  | 168785034-170366918 | 1581885 | K055570, WDR27, C6orf120, PHF10, TC1E3, C6orf70, C                                                   | 0           | 1 | 0.00 | 0.00 |
| 6q#94125_94163    | 6  | 170521599-170943147 | 421549  | KIAA1838, AL832760, AB209078, PSMB1, TBP, PDCD2                                                      | 0           | 1 | 0.00 | 0.00 |
| 9q#126700_126708  | 9  | 127482407-127544456 | 62050   | STXBP1, BC032117                                                                                     | 0           | 1 | 0.00 | 0.00 |
| 6q#933479_93495   | 6  | 162606713-162762168 | 155456  | PARK2                                                                                                | 0           | 1 | 0.00 | 0.00 |
| 6q#93343_93422    | 6  | 161254786-162069487 | 814702  | MAP3K4, AGPAT4, PARK2                                                                                | 0           | 1 | 0.00 | 0.00 |
| 6q#933879_93982   | 6  | 167474829-168778331 | 1303503 | TL2, TCP10, MLLT4, C6orf54, KIF25, FRMD1, AK12596                                                    | 0           | 1 | 0.00 | 0.00 |
| 6q#94113_94124    | 6  | 170383692-170509281 | 125590  | AK058183, AK097676, DLL1                                                                             | 0           | 1 | 0.00 | 0.00 |
| 8p#107794_107827  | 8  | 3155441-3461656     | 306216  | CSMD1                                                                                                | 0           | 1 | 0.00 | 0.00 |
| 6q#91551_91567    | 6  | 138526879-138652652 | 125774  | AF189270, KIAA1244                                                                                   | 0.692294348 | 1 | 0.02 | 0.02 |
| 6q#91582_91589    | 6  | 138802960-138870582 | 67623   | BX647246, AK092744                                                                                   | 0.692294348 | 1 | 0.02 | 0.02 |
| 6q#91590_91655    | 6  | 138876080-139610510 | 734431  | 1677, AK092592, CCDC28A, REPS1, AF161398, HECA,                                                      | Inf         | 1 | 0.02 | 0.00 |
| 6q#91656_91688    | 6  | 139623090-140144302 | 521213  | TXLNB, CITED2, BC039503                                                                              | 0           | 1 | 0.00 | 0.00 |
| 6q#91689_91728    | 6  | 140165728-141313243 | 1147516 | BC039503, BC038188                                                                                   | Inf         | 1 | 0.02 | 0.00 |
| 6q#92837_92855    | 6  | 154713200-154873840 | 160641  | PIP3-E, BC016684, CNKSR3                                                                             | 0           | 1 | 0.00 | 0.00 |
| 18p#201656_201661 | 18 | 11874023-11894117   | 20095   | MPPE1                                                                                                | 0           | 1 | 0.00 | 0.00 |
| 6q#90166_90181    | 6  | 121841074-122267014 | 425941  |                                                                                                      | 0.692294348 | 1 | 0.02 | 0.02 |
| 6q#91199_91209    | 6  | 134300975-134391849 | 90875   | TBPL1, SLC2A12                                                                                       | 0           | 1 | 0.00 | 0.00 |
| 6q#92948_92979    | 6  | 156058600-156910990 | 852391  |                                                                                                      | 0           | 1 | 0.00 | 0.00 |
| 6q#92990_93020    | 6  | 157212143-157485454 | 273312  | ARID1B                                                                                               | 0           | 1 | 0.00 | 0.00 |
| 6q#93031_93067    | 6  | 158040459-158364414 | 323956  | ZDHC14, AF001629, SNX9                                                                               | 0           | 1 | 0.00 | 0.00 |
| 6q#93089_93109    | 6  | 158540239-158783105 | 242867  | SERAC1, GTF2H5, AK129771, TULP4                                                                      | 0           | 1 | 0.00 | 0.00 |
| 6q#93168_93245    | 6  | 159352693-160217415 | 864723  | 2, CR618966, FNDC1, SOD2, AK097395, WTAP, ACAT2                                                      | 0           | 1 | 0.00 | 0.00 |
| 9q#126797_126841  | 9  | 128074975-128293123 | 218149  | 414820, AK025326, TRUB2, COQ4, SLC27A4, C9orf74, 1                                                   | 0           | 1 | 0.00 | 0.00 |
| 8p#109735_109749  | 8  | 27501969-27590001   | 88033   | BC033331, CLU, SCARA3                                                                                | 0           | 1 | 0.00 | 0.00 |
| 9q#126709_126723  | 9  | 127550380-127634880 | 84501   | 32117, C9orf117, TTC16, TOR2A, SH2D3C, CDK9, AF08                                                    | 0           | 1 | 0.00 | 0.00 |
| 18p#201580_201613 | 18 | 10718283-11206383   | 488101  | AK093284, AK127627, AK098782, C18orf58                                                               | 0           | 1 | 0.00 | 0.00 |
| 6q#92856_92860    | 6  | 154879106-154911158 | 32053   | CNKSR3                                                                                               | 0           | 1 | 0.00 | 0.00 |
| 6q#91210_91215    | 6  | 134400994-134452800 | 51807   | SLC2A12                                                                                              | 0           | 1 | 0.00 | 0.00 |
| 6q#91568_91581    | 6  | 138664410-138791891 | 127482  | KIAA1244, HEBP2, BX647246                                                                            | 0.692294348 | 1 | 0.02 | 0.02 |
| 6q#92765_92836    | 6  | 153453280-154706436 | 1253157 | RGS17, OPRM1, PIP3-E                                                                                 | 0           | 1 | 0.00 | 0.00 |
| 6q#92882_92903    | 6  | 155245792-155519782 | 273991  | RBM16, AB095936, TIAM2                                                                               | 0           | 1 | 0.00 | 0.00 |
| 6q#92907_92947    | 6  | 155553453-156036577 | 483125  | TIAM2, TFB1M, NOX3                                                                                   | 0           | 1 | 0.00 | 0.00 |
| 18p#201634_201655 | 18 | 11709550-11868142   | 158593  | GNAL                                                                                                 | 0           | 1 | 0.00 | 0.00 |
| 18p#201662_201691 | 18 | 11909301-12248043   | 338743  | IMPA2, BX648696, BX649021, CIDEA                                                                     | 0           | 1 | 0.00 | 0.00 |
| 18p#201774_201777 | 18 | 12955768-12974183   | 18416   | SEH1L                                                                                                | 0           | 1 | 0.00 | 0.00 |
| 8p#108080_108082  | 8  | 6577088-6602415     | 25328   | AGPAT5                                                                                               | 0           | 1 | 0.00 | 0.00 |
| 8p#108092_108102  | 8  | 6685333-6762968     | 77636   | BC043547, DEFB1                                                                                      | 0           | 1 | 0.00 | 0.00 |
| 8p#108118_108125  | 8  | 6878043-6913320     | 35278   | DEFA5                                                                                                | 0           | 1 | 0.00 | 0.00 |
| 9q#126775_126796  | 9  | 127958486-128072163 | 113678  | AK124723, PTGES2, LCN2, C9orf16, CIZ1, DNMI                                                          | 0           | 1 | 0.00 | 0.00 |
| 9q#126842_126924  | 9  | 128301311-128854909 | 553599  | ZDHC12, ZYG11BL, TBC1D13, ENDOG, C9orf114, CC                                                        | 0           | 1 | 0.00 | 0.00 |
| 9q#127455_127458  | 9  | 133513807-133540263 | 26457   | CR592354, DBH                                                                                        | 0           | 1 | 0.00 | 0.00 |
| 6q#92751_92764    | 6  | 153385541-153446124 | 60584   | FBXO5, MTRF1L, RGS17                                                                                 | 0           | 1 | 0.00 | 0.00 |
| 6q#92861_92881    | 6  | 154919262-155235537 | 316276  | CNKSR3, RBM16                                                                                        | 0           | 1 | 0.00 | 0.00 |
| 6q#92904_92906    | 6  | 155530077-155542552 | 12476   | TIAM2                                                                                                | 0           | 1 | 0.00 | 0.00 |
| 18p#201778_201795 | 18 | 12981995-13114459   | 132465  | AK096548, Cep192                                                                                     | 0           | 1 | 0.00 | 0.00 |
| 8p#109230_109241  | 8  | 22152647-22209370   | 56724   | POLR3D, AK125346, PIWIL2                                                                             | 0           | 1 | 0.00 | 0.00 |
| 8p#108103_108117  | 8  | 6770098-6873540     | 103443  | DEFA6, DEFA4, DEFA1                                                                                  | 0           | 1 | 0.00 | 0.00 |
| 8p#109242_109370  | 8  | 22217456-23190941   | 973486  | W3, AL833160, EGR3, PEBP4, AK092617, BC034917, R                                                     | 0           | 1 | 0.00 | 0.00 |

|                   |    |                     |         |                                                   |     |   |      |      |
|-------------------|----|---------------------|---------|---------------------------------------------------|-----|---|------|------|
| 18p#201614_201633 | 18 | 11241899-11702680   | 460782  | BX647358, GNAL                                    | 0   | 1 | 0.00 | 0.00 |
| 18p#201692_201773 | 18 | 12252335-12945813   | 693479  | C18orf43, AK128548, SPIRE1, AF068295, CEP76, TNF  | 0   | 1 | 0.00 | 0.00 |
| 9q#126925_126929  | 9  | 128861680-128881996 | 20317   | SH3GLB2, FAM73B                                   | 0   | 1 | 0.00 | 0.00 |
| 9q#127459_127469  | 9  | 133544571-133625754 | 81184   | DBH, SARDH                                        | 0   | 1 | 0.00 | 0.00 |
| 4p#56614_56747    | 4  | 38791317-39961244   | 1169928 | RPL9, LIAS, UGDH, AK056558, LOC201895, BC0403     | 0   | 1 | 0.00 | 0.00 |
| 4p#56762_56771    | 4  | 40140842-40254483   | 113642  | CHRNA9                                            | 0   | 1 | 0.00 | 0.00 |
| 17p#194114_194126 | 17 | 9956952-10068462    | 11511   | GAS7                                              | 0   | 1 | 0.00 | 0.00 |
| 17p#194300_194334 | 17 | 12126433-12613305   | 486873  | AK092009, MYOCD, BX649083                         | 0   | 1 | 0.00 | 0.00 |
| 4p#56427_56575    | 4  | 36124760-38448856   | 2324097 | BC033065, BC037906, C4orf19, BC039540, PGM2, TBC1 | 0   | 1 | 0.00 | 0.00 |
| 17p#194778_194780 | 17 | 18344018-18470674   | 126657  | BC063453                                          | 0   | 1 | 0.00 | 0.00 |
| 4q#57827_57842    | 4  | 56900758-57089010   | 188253  | AK126014, AB033037, AASDH                         | Inf | 1 | 0.02 | 0.00 |
| 10p#130831_130873 | 10 | 32948128-33348092   | 399965  | C10orf68, ITGB1                                   | 0   | 1 | 0.00 | 0.00 |
| 17p#194335_194346 | 17 | 12619970-12739017   | 119048  | BX649083, KIAA0672                                | 0   | 1 | 0.00 | 0.00 |
| 17p#194443_194453 | 17 | 14363732-14594858   | 231127  |                                                   | 0   | 1 | 0.00 | 0.00 |
| 17p#194455_194502 | 17 | 14616651-15479495   | 862845  | 3345, PMP22, TEK13, CDRT4, AB074181, FAM18B2, AF  | 0   | 1 | 0.00 | 0.00 |
| 4p#56772_56933    | 4  | 40266109-41909584   | 1643476 | LJ14001, APBB2, UCHL1, KIAA1102, PHOX2B, TMEM3    | 0   | 1 | 0.00 | 0.00 |
| 4q#57498_57524    | 4  | 52825390-53237566   | 412167  | BC016458                                          | Inf | 1 | 0.02 | 0.00 |
| 2p#25083_25093    | 2  | 71726185-71830597   | 104413  | DYSF                                              | 0   | 1 | 0.00 | 0.00 |
| 2p#25363_25393    | 2  | 74482254-74630304   | 148051  | 2, BC051331, WDR54, RTKN, ZNHIT4, WBP1, GCS1, M   | 0   | 1 | 0.00 | 0.00 |
| 10q#139125_139127 | 10 | 135057540-135065216 | 7677    | C10orf125, ECHS1                                  | 0   | 1 | 0.00 | 0.00 |
| 4p#56576_56613    | 4  | 38460206-38782820   | 322615  | LJ13197, KLF3, S77393, TLR10, TLR1, TLR6, LOC9268 | 0   | 1 | 0.00 | 0.00 |
| 4p#53951_53995    | 4  | 41413-489729        | 448317  | BC020836, AK124097, MGC26356, ZNF141, BC03679     | 0   | 1 | 0.00 | 0.00 |
| 4q#57739_57749    | 4  | 55720089-55857630   | 137542  | KDR                                               | Inf | 1 | 0.02 | 0.00 |
| 4q#57792_57826    | 4  | 56348607-56886254   | 537648  | EXOC1, CEP135, AK126014                           | Inf | 1 | 0.02 | 0.00 |
| 10p#130959_130975 | 10 | 34694996-34837676   | 142681  | PARD3                                             | 0   | 1 | 0.00 | 0.00 |
| 10p#130983_131044 | 10 | 34906113-35450929   | 544817  | PARD3, CUL2                                       | 0   | 1 | 0.00 | 0.00 |
| 10p#131045_131049 | 10 | 35461405-35496607   | 35203   | CREM                                              | Inf | 1 | 0.02 | 0.00 |
| 10p#131050_131057 | 10 | 35508483-35550008   | 41526   | CREM                                              | 0   | 1 | 0.00 | 0.00 |
| 4p#54361_54376    | 4  | 3813753-4314140     | 500388  | OTOP1                                             | 0   | 1 | 0.00 | 0.00 |
| 17p#194084_194113 | 17 | 9691749-9943896     | 252148  | GLP2R, BC043390, RCV1, GAS7                       | 0   | 1 | 0.00 | 0.00 |
| 6p#85246_85382    | 6  | 45993935-47258801   | 1264867 | BC042616, CYP39A1, SLC25A27, TDRD6, PLA2G7, AK    | 0   | 1 | 0.00 | 0.00 |
| 6p#85394_85481    | 6  | 47387660-48429137   | 1041478 | GPR111, AY140957, GPR115, OPN5, LOC442213, FL     | 0   | 1 | 0.00 | 0.00 |
| 4p#53997_54000    | 4  | 504450-531093       | 26644   | PIGG                                              | 0   | 1 | 0.00 | 0.00 |
| 4p#54733_54744    | 4  | 7563358-7649635     | 86278   | SORCS2                                            | 0   | 1 | 0.00 | 0.00 |
| 10q#139128_139129 | 10 | 135071444-135077259 | 5816    | ECHS1                                             | 0   | 1 | 0.00 | 0.00 |
| 10q#139137_139138 | 10 | 135120942-135123724 | 2783    | MTG1, SPRN                                        | 0   | 1 | 0.00 | 0.00 |
| 2p#20785_20786    | 2  | 20354952-20364809   | 9858    |                                                   | 0   | 1 | 0.00 | 0.00 |
| 2p#21122_21128    | 2  | 25175278-25224621   | 49344   | AB023170                                          | 0   | 1 | 0.00 | 0.00 |
| 2p#21129_21158    | 2  | 25233251-25457463   | 224213  | AB023170, AK095190, POMC, DNMT3A                  | 0   | 1 | 0.00 | 0.00 |
| 4p#54301_54329    | 4  | 3256459-3520524     | 264066  | HD, LOC345222, AF085973, RGS12, HGFAC, FLJ33718   | 0   | 1 | 0.00 | 0.00 |
| 4p#54334_54336    | 4  | 3556852-3568583     | 11732   | LRPAP1                                            | 0   | 1 | 0.00 | 0.00 |
| 2p#24586_24644    | 2  | 66128902-67154087   | 1025186 | FLJ16124, AK091143, MEIS1                         | 0   | 1 | 0.00 | 0.00 |
| 2p#24766_24840    | 2  | 68806787-69478745   | 671959  | ARHGAP25, BMP10, GDDR, GKN1, ANTXR1, GFPT1        | 0   | 1 | 0.00 | 0.00 |
| 2p#24890_25082    | 2  | 69991146-71717354   | 1726209 | FLJ14668, TGFA, ADD2, FIGLA, CLEC4F, CD207, AF0   | 0   | 1 | 0.00 | 0.00 |
| 2p#25094_25362    | 2  | 71836764-74476360   | 2639597 | R4, ALMS1, NAT8, LOC200420, TPRKB, DUSP11, AK1    | 0   | 1 | 0.00 | 0.00 |
| 2p#25394_25442    | 2  | 74634067-75066429   | 432363  | 1, BC018611, DQX1, AUP1, HTRA2, LOXL3, DOK1, LO   | 0   | 1 | 0.00 | 0.00 |
| 2p#26073_26191    | 2  | 85301323-86206193   | 904871  | 72A, GGCX, VAMP8, VAMP5, LOC51255, TMEM150, LC    | 0   | 1 | 0.00 | 0.00 |
| 4q#57473_57497    | 4  | 52638144-52811101   | 172958  | LOC339977, SGCB, SPATA18, BC016458                | Inf | 1 | 0.02 | 0.00 |
| 22q#222724_222736 | 22 | 28423934-28488985   | 65052   | CABP7, ZMAT5, UCRG                                | Inf | 1 | 0.02 | 0.00 |
| 22q#224683_224712 | 22 | 43555822-43793374   | 237553  | LOC553158, PHF21B, AB051448                       | 0   | 1 | 0.00 | 0.00 |
| 2q#37620_37654    | 2  | 23897948-239331519  | 353572  | PER2, TRAF3IP1, ASB1, AK057376                    | 0   | 1 | 0.00 | 0.00 |
| 4p#54745_54756    | 4  | 7656497-7762124     | 105628  | SORCS2                                            | 0   | 1 | 0.00 | 0.00 |
| 2p#21447_21594    | 2  | 27737586-29058214   | 1320629 | 3, RBKS, BRE, AK055918, FOSL2, PLB1, AF092905, PP | 0   | 1 | 0.00 | 0.00 |
| 4q#57750_57791    | 4  | 55894665-56341548   | 446884  | 5A2L, BC047403, TPARL, BC040570, CLOCK, PDCL2, I  | Inf | 1 | 0.02 | 0.00 |
| 6p#85193_85203    | 6  | 45267482-45354276   | 86795   | SUPT3H                                            | 0   | 1 | 0.00 | 0.00 |

|                   |    |                     |         |                                                     |     |   |      |      |
|-------------------|----|---------------------|---------|-----------------------------------------------------|-----|---|------|------|
| 6p#85222_85245    | 6  | 45524595-45987470   | 462876  | RUNX2, CLIC5                                        | 0   | 1 | 0.00 | 0.00 |
| 1p#7260_7302      | 1  | 78584723-79150715   | 565993  | 5694, PTGFR, BX537508, IFI44L, IFI44, AK129766, AY3 | 0   | 1 | 0.00 | 0.00 |
| 1p#7319_7334      | 1  | 79521244-80001984   | 480741  |                                                     | 0   | 1 | 0.00 | 0.00 |
| 2p#21264_21273    | 2  | 26453306-26526478   | 73173   | GPR113, BC043211, SELI                              | 0   | 1 | 0.00 | 0.00 |
| 10p#130976_130982 | 10 | 34844635-34893093   | 48459   | PARD3                                               | 0   | 1 | 0.00 | 0.00 |
| 10p#131058_131078 | 10 | 35560604-35754592   | 193989  | C10orf9                                             | 0   | 1 | 0.00 | 0.00 |
| 10p#131138_131147 | 10 | 36924865-37229819   | 304955  |                                                     | Inf | 1 | 0.02 | 0.00 |
| 10p#131163_131168 | 10 | 37530005-37573734   | 43730   | ANKRD30A                                            | Inf | 1 | 0.02 | 0.00 |
| 10p#131173_131174 | 10 | 37676368-37696122   | 19755   |                                                     | Inf | 1 | 0.02 | 0.00 |
| 10p#131175_131227 | 10 | 37726105-38544308   | 818204  | 8, ZNF25, BC017760, ZNF33A, AK027057, ZNF37A, AL    | 0   | 1 | 0.00 | 0.00 |
| 2p#20787_20788    | 2  | 20371775-20380443   | 8669    | PUM2                                                | 0   | 1 | 0.00 | 0.00 |
| 2q#32671_32676    | 2  | 179140659-179163269 | 22611   | PRKRA, AK129531, FKBP7                              | 0   | 1 | 0.00 | 0.00 |
| 2p#20810_20818    | 2  | 20629422-20767620   | 138199  | HS1BP3                                              | 0   | 1 | 0.00 | 0.00 |
| 2q#33080_33083    | 2  | 184609129-184686542 | 77414   |                                                     | 0   | 1 | 0.00 | 0.00 |
| 22q#222491_222501 | 22 | 26345036-26491176   | 146141  | MN1                                                 | 0   | 1 | 0.00 | 0.00 |
| 22q#222509_222578 | 22 | 26559884-27445674   | 885791  | PITPNB, BC060374, AL832597, AB028966, CHEK2         | 0   | 1 | 0.00 | 0.00 |
| 22q#222605_222609 | 22 | 27611211-27644874   | 33664   | AB051436                                            | 0   | 1 | 0.00 | 0.00 |
| 22q#223435_223478 | 22 | 34556081-34906456   | 350376  | RBM9, AK055213, APOL3                               | 0   | 1 | 0.00 | 0.00 |
| 22q#222610_222628 | 22 | 27653678-27779274   | 125597  | AB051436, HS747E2A                                  | 0   | 1 | 0.00 | 0.00 |
| 22q#222711_222723 | 22 | 28330461-28417001   | 86541   | NF2                                                 | Inf | 1 | 0.02 | 0.00 |
| 22q#222737_222787 | 22 | 28496913-28903659   | 406747  | ASCC2, MTMR3, HORMAD2                               | Inf | 1 | 0.02 | 0.00 |
| 1p#103_104        | 1  | 1755813-1762018     | 6206    | GNB1                                                | 0   | 1 | 0.00 | 0.00 |
| 22q#224353_224442 | 22 | 40849008-41599077   | 750070  | AK074094, NFAM1, SERHL, CGI-96, SERHL2, AK09820     | 0   | 1 | 0.00 | 0.00 |
| 22q#224639_224682 | 22 | 43065069-43544642   | 479574  | LDOC1L, LOC388910, PRR5, LOC553158                  | 0   | 1 | 0.00 | 0.00 |
| 22q#224713_224806 | 22 | 43807025-44596402   | 789378  | UP50, C22orf9, UPK3A, FAM118A, SMC1L2, RIBC2, FB    | 0   | 1 | 0.00 | 0.00 |
| 2q#27925_27938    | 2  | 114985073-115097449 | 112377  | DPP10                                               | 0   | 1 | 0.00 | 0.00 |
| 4p#54186_54248    | 4  | 20562226-2810827    | 754602  | tf15, MXD4, ZFYVE28, AK126028, BC010180, RNF4, C4   | 0   | 1 | 0.00 | 0.00 |
| 4p#54262_54300    | 4  | 2914556-3242901     | 328346  | ADD1, TETRA, C4orf9, GRK4, HD                       | 0   | 1 | 0.00 | 0.00 |
| 4p#54331_54333    | 4  | 3533121-3551312     | 18192   | FLJ33718, AF085973, LRPAP1                          | 0   | 1 | 0.00 | 0.00 |
| 4p#54349_54360    | 4  | 3673803-3807240     | 133438  | BX648772, ADRA2C                                    | 0   | 1 | 0.00 | 0.00 |
| 4p#54377_54695    | 4  | 4327213-7190463     | 2863251 | 03, EVC2, EVC, AF216184, CRMP1, BX648674, FLJ464    | 0   | 1 | 0.00 | 0.00 |
| 4p#54696_54707    | 4  | 7197941-7344809     | 146889  | BC045770, SORCS2                                    | 0   | 1 | 0.00 | 0.00 |
| 4p#54731_54732    | 4  | 7550081-7555924     | 5844    | SORCS2                                              | 0   | 1 | 0.00 | 0.00 |
| 10q#138194_138314 | 10 | 124691172-126104112 | 1412941 | B, BUB3, AK057388, CR607950, GPR26, AK091093, BC    | 0   | 1 | 0.00 | 0.00 |
| 4p#54002_54004    | 4  | 545241-564041       | 18801   | AK123125                                            | 0   | 1 | 0.00 | 0.00 |
| 1p#7176_7259      | 1  | 77719212-78560086   | 840875  | C1orf118, CR936630, NEXN, FUBP1, U40992, DNAJB4,    | 0   | 1 | 0.00 | 0.00 |
| 1p#7303_7318      | 1  | 79158145-79489964   | 331820  | AY358360                                            | 0   | 1 | 0.00 | 0.00 |
| 1p#7335_7350      | 1  | 80044488-80556034   | 511547  |                                                     | 0   | 1 | 0.00 | 0.00 |
| 2p#25443_25452    | 2  | 75079140-75174482   | 95343   | BC038580, POLE4, AY034104                           | 0   | 1 | 0.00 | 0.00 |
| 2p#26049_26072    | 2  | 85045417-85295461   | 250045  | TMSB10, KCMF1, TCF7L1                               | 0   | 1 | 0.00 | 0.00 |
| 2p#26192_26253    | 2  | 86217028-86868454   | 651427  | 48646, IMMT, MRPL35, REEP1, BC041870, JMJD1A, V     | 0   | 1 | 0.00 | 0.00 |
| 2p#26287_26387    | 2  | 88155006-89342444   | 1187439 | FLJ25369, BC044304, EIF2AK3, RPIA, CR596262, BX64   | 0   | 1 | 0.00 | 0.00 |
| 22q#222502_222508 | 22 | 26496882-26552478   | 55597   | MN1                                                 | 0   | 1 | 0.00 | 0.00 |
| 22q#222579_222604 | 22 | 27454916-27606473   | 151558  | CHEK2, HSC20, M31627, FLJ33814, XBP1, AB051436      | 0   | 1 | 0.00 | 0.00 |
| 22q#223307_223321 | 22 | 33080679-33547351   | 466673  |                                                     | 0   | 1 | 0.00 | 0.00 |
| 22q#223330_223434 | 22 | 33700502-34545085   | 844584  | TOM1, HMOX1, MCM5, RASD2, MB, LOC284912, APO        | 0   | 1 | 0.00 | 0.00 |
| 1p#101_102        | 1  | 1741058-1748915     | 7858    | NADK, AK096614                                      | 0   | 1 | 0.00 | 0.00 |
| 22q#223479_223480 | 22 | 34911932-34919094   | 7163    | APOL4                                               | 0   | 1 | 0.00 | 0.00 |
| 22q#223520_223574 | 22 | 35222958-35561218   | 338261  | FLJ23322, EIF3S7, CACNG2, AK123632, RABL4, PVALB    | 0   | 1 | 0.00 | 0.00 |
| 22q#224313_224352 | 22 | 40622520-40843123   | 220604  | 18, BC068568, SEPT3, MGC26816, AK128138, AK1296     | 0   | 1 | 0.00 | 0.00 |
| 22q#224443_224606 | 22 | 41606814-42781418   | 1174605 | L12, AK056490, SCUBE1, MPPE1, FLJ23588, SUL T4      | 0   | 1 | 0.00 | 0.00 |
| 22q#224807_224828 | 22 | 44606281-44799164   | 192884  | WNT7B, AL137569, FLJ10945, BC036832                 | 0   | 1 | 0.00 | 0.00 |
| 2p#24725_24765    | 2  | 68446559-68800918   | 354360  | 2, PLEK, LOC554251, C2orf13, BC030711, AK122915, P  | 0   | 1 | 0.00 | 0.00 |
| 2p#24841_24861    | 2  | 69493193-69683312   | 190120  | GFPT1, HIRIP5, DKFZp686K16132, AK056043, AAK1       | 0   | 1 | 0.00 | 0.00 |
| 2p#25631_25670    | 2  | 78185973-78716669   | 530697  | BC030125, BC024248                                  | 0   | 1 | 0.00 | 0.00 |



|                   |    |                     |         |                                                  |     |   |      |      |
|-------------------|----|---------------------|---------|--------------------------------------------------|-----|---|------|------|
| 2p#26254_26272    | 2  | 86887173-87237018   | 349846  | RMND5A, BC033072, CD8A, CD8B                     | 0   | 1 | 0.00 | 0.00 |
| 2q#26535_26538    | 2  | 96261801-96279471   | 17671   | STARD7                                           | 0   | 1 | 0.00 | 0.00 |
| 6p#85170_85192    | 6  | 45050451-45260250   | 209800  | SUPT3H                                           | 0   | 1 | 0.00 | 0.00 |
| 2p#21298_21301    | 2  | 26729091-26750456   | 21366   | CIB4                                             | 0   | 1 | 0.00 | 0.00 |
| 2p#21312_21446    | 2  | 26850859-277131340  | 880482  | GC44505, SLC5A6, C2orf28, CAD, SLC30A3, DNAJC5G  | 0   | 1 | 0.00 | 0.00 |
| 2p#21595_21710    | 2  | 29064052-30086778   | 1022727 | 8, AK125239, LOC165186, FLJ34931, AF433661, RSNL | 0   | 1 | 0.00 | 0.00 |
| 4p#57452_57460    | 4  | 48850183-49422795   | 572613  | FLJ21511, CR936796                               | 0   | 1 | 0.00 | 0.00 |
| 6p#83037_83104    | 6  | 27183361-27884404   | 701044  | AK130332, PRSS16, POM121L2, FKSG83, AL833520, E  | 0   | 1 | 0.00 | 0.00 |
| 10p#131169_131172 | 10 | 37582079-37642306   | 60228   | Inf                                              | Inf | 1 | 0.02 | 0.00 |
| 2p#20744_20777    | 2  | 19981293-20317425   | 336133  | 22396, BC0688572, LOC130502, WDR35, MATN3, LAPT, | 0   | 1 | 0.00 | 0.00 |
| 2p#20790_20809    | 2  | 20400458-20602494   | 202037  | PUM2, AK093847, RHOB                             | 0   | 1 | 0.00 | 0.00 |
| 2q#27227_27233    | 2  | 104231782-104456757 | 224976  |                                                  | 0   | 1 | 0.00 | 0.00 |
| 2p#20295_20318    | 2  | 11716002-11930942   | 214941  | GREB1, NTSR2, BC041899, BC018071, LPIN1          | 0   | 1 | 0.00 | 0.00 |
| 2p#20994_21049    | 2  | 23991869-24428245   | 436377  | BC033385, BX647146, FLJ21945, FKBP1B, AK026273   | 0   | 1 | 0.00 | 0.00 |
| 2p#21076_21121    | 2  | 24807973-25168364   | 360392  | COA1, LOC391356, MGC11266, ADCY3, RBJ, CR93367   | 0   | 1 | 0.00 | 0.00 |
| 2p#21159_21263    | 2  | 25464486-26444901   | 980416  | TNB, ASXL2, KIF3C, RAB10, AB124552, HADHA, HADH  | 0   | 1 | 0.00 | 0.00 |
| 2p#21274_21279    | 2  | 26536017-26578811   | 42795   | MGC16372                                         | 0   | 1 | 0.00 | 0.00 |
| 2p#21302_21311    | 2  | 26761124-26845459   | 84336   | CIB4, KCNK3                                      | 0   | 1 | 0.00 | 0.00 |
| 4p#57142_57221    | 4  | 45688360-46770117   | 1081758 | GABRG1, GABRA2, COX7B2, AX721204, GABRA4         | 0   | 1 | 0.00 | 0.00 |
| 6p#84895_84920    | 6  | 42775080-42965692   | 190613  | RDS, TBCC, D87077, FLJ38717, KIAA0240, RPL7L1    | 0   | 1 | 0.00 | 0.00 |
| 6p#84947_85028    | 6  | 43101791-43680351   | 578561  | C6orf108, TTBK1, SLC22A7, AK124657, BC068247, ZN | 0   | 1 | 0.00 | 0.00 |
| 10p#131079_131089 | 10 | 35761394-35850109   | 88716   | C10orf9                                          | 0   | 1 | 0.00 | 0.00 |
| 10p#131148_131162 | 10 | 37257968-37523266   | 265299  | ANKRD30A                                         | Inf | 1 | 0.02 | 0.00 |
| 2p#20292_20294    | 2  | 11691745-11707626   | 15882   | GREB1                                            | 0   | 1 | 0.00 | 0.00 |
| 2q#33441_33500    | 2  | 190190746-190859806 | 669061  | ASNSD1, BC044907, FLJ25415, OSGEPL1, ORMDL1, P   | 0   | 1 | 0.00 | 0.00 |
| 2q#34275_34331    | 2  | 201783861-202202282 | 418422  | 91587, CASP10, CASP8, ALS2CR12, AK124115, TRAK   | 0   | 1 | 0.00 | 0.00 |
| 2q#34905_34961    | 2  | 208415887-208944394 | 528508  | 02, FZD5, AK123204, BX648983, CRYGD, CRYGC, CR   | 0   | 1 | 0.00 | 0.00 |
| 2q#34989_35064    | 2  | 209309316-210626226 | 1316911 | MAP2, C2orf21, AB058746                          | 0   | 1 | 0.00 | 0.00 |
| 4q#63553_63574    | 4  | 138639246-139021008 | 381763  | PCDH18                                           | 0   | 1 | 0.00 | 0.00 |
| 6p#85029_85120    | 6  | 43690266-44391792   | 701527  | 5491, AK024736, MRPL14, TMEM63B, CAPN11, SLC29   | 0   | 1 | 0.00 | 0.00 |
| 4p#54337_54347    | 4  | 3573080-3641294     | 68215   | FLJ35424                                         | 0   | 1 | 0.00 | 0.00 |
| 10q#134557_134558 | 10 | 85243855-85283118   | 39264   |                                                  | Inf | 1 | 0.02 | 0.00 |
| 10q#138315_138328 | 10 | 126113575-126236181 | 122607  | LHPP                                             | 0   | 1 | 0.00 | 0.00 |
| 1p#7024_7175      | 1  | 76113708-77706731   | 1593024 | BX648274, AK056241, ST6GALNAC5, AF137837, BX648  | 0   | 1 | 0.00 | 0.00 |
| 22q#222788_222833 | 22 | 28912243-29139622   | 227380  | K054758, LOC652968, TBC1D10A, SF3A1, LOC550631   | Inf | 1 | 0.02 | 0.00 |
| 22q#223109_223306 | 22 | 31105822-33051048   | 1945227 | BPIL2, BC062656, FBXO7, BC042456, SYN3, AB20968  | 0   | 1 | 0.00 | 0.00 |
| 22q#223575_223587 | 22 | 35565248-35625431   | 60184   | NCF4                                             | 0   | 1 | 0.00 | 0.00 |
| 22q#223852_223872 | 22 | 37273276-37394372   | 121097  | DMC1, PGEA1                                      | 0   | 1 | 0.00 | 0.00 |
| 22q#223989_223991 | 22 | 38164747-38186707   | 21961   | MGAT3                                            | 0   | 1 | 0.00 | 0.00 |
| 22q#224025_224031 | 22 | 38423366-38469663   | 46298   | FLJ25421                                         | 0   | 1 | 0.00 | 0.00 |
| 22q#224131_224253 | 22 | 39255266-40235894   | 980629  | P300, BC040700, L3MBTL2, BC040188, RANGAP1, BC0  | 0   | 1 | 0.00 | 0.00 |
| 22q#223481_223519 | 22 | 34925625-35220275   | 294651  | APOL2, APOL1, MYH9, TXN2, FLJ23322               | 0   | 1 | 0.00 | 0.00 |
| 22q#224254_224312 | 22 | 40242067-40618464   | 376398  | BC039554, D15Wsu75e, XRCC6, NHP2L1, FLJ23584, MA | 0   | 1 | 0.00 | 0.00 |
| 2p#19646_19672    | 2  | 2924452-3215087     | 290636  | R602075, RNASEH1, AK023018, AK125306, RPS7, CO   | 0   | 1 | 0.00 | 0.00 |
| 2p#19694_19723    | 2  | 3455242-3922258     | 467017  | BC043283                                         | 0   | 1 | 0.00 | 0.00 |
| 2p#20002_20287    | 2  | 8777748-11647353    | 2869606 | KLF11, AF504647, CYS1, RRM2, AK123010, FLJ25102  | 0   | 1 | 0.00 | 0.00 |
| 2p#20288_20291    | 2  | 11658845-11682539   | 23695   | GREB1                                            | 0   | 1 | 0.00 | 0.00 |
| 2p#20819_20821    | 2  | 20775713-20790761   | 15049   | GDF7                                             | 0   | 1 | 0.00 | 0.00 |
| 2p#20822_20930    | 2  | 20794885-23148321   | 2353437 | FLJ21820, APOB, AF113010, AK090620               | 0   | 1 | 0.00 | 0.00 |
| 2p#20931_20993    | 2  | 23178086-23977187   | 799102  | BC013982, AB033066, AK125718, AK131301           | 0   | 1 | 0.00 | 0.00 |
| 2p#21280_21297    | 2  | 26585111-26717208   | 132098  | MGC16372, OTOF, AK091483, CIB4                   | 0   | 1 | 0.00 | 0.00 |
| 2p#21849_21918    | 2  | 31805766-32525573   | 719808  | LOC84661, SPAST, SLC30A6, AL832755, CARD12, G3   | 0   | 1 | 0.00 | 0.00 |
| 2p#25453_25464    | 2  | 75185901-75293883   | 107983  | TACR1                                            | 0   | 1 | 0.00 | 0.00 |
| 2p#26045_26048    | 2  | 85002702-85033639   | 30938   | BC051789                                         | 0   | 1 | 0.00 | 0.00 |
| 2p#26284_26286    | 2  | 88099999-88146151   | 46153   | RGPD2                                            | 0   | 1 | 0.00 | 0.00 |

|                   |    |                     |         |                                                   |             |   |      |      |
|-------------------|----|---------------------|---------|---------------------------------------------------|-------------|---|------|------|
| 2q#26539_26540    | 2  | 96288507-96292913   | 4407    | STAR7D                                            | 0           | 1 | 0.00 | 0.00 |
| 2q#30761_30850    | 2  | 157309209-158699025 | 1389817 | JAA1189, PSCDBP, ACVR1C, ACVR1, BC033867, AF08    | 0           | 1 | 0.00 | 0.00 |
| 2q#32387_32408    | 2  | 175814094-176132378 | 318285  | ATF2, ATP5G3                                      | 0           | 1 | 0.00 | 0.00 |
| 2q#33204_33288    | 2  | 186748512-187950214 | 1201703 | LEREPO4, BC036396, ITGAV, KIAA1946, ZSWIM2        | 0           | 1 | 0.00 | 0.00 |
| 2q#33435_33440    | 2  | 190132610-190177635 | 45026   | WDR75                                             | 0           | 1 | 0.00 | 0.00 |
| 2q#33658_33680    | 2  | 192699099-192914729 | 215631  | TMEFF2                                            | 0           | 1 | 0.00 | 0.00 |
| 4p#54708_54730    | 4  | 7357072-7539394     | 182323  | SORCS2                                            | 0           | 1 | 0.00 | 0.00 |
| 4p#57222_57276    | 4  | 46780639-47278044   | 497406  | GABRA4, GABRB1, AK124778                          | 0           | 1 | 0.00 | 0.00 |
| 4p#57277_57350    | 4  | 47284941-47919404   | 634464  | ATP10D, CORIN, NFXL1, BC041434, CNGA1, X64802, I  | 0           | 1 | 0.00 | 0.00 |
| 4p#57351_57451    | 4  | 47929534-48841794   | 912261  | A4, BC012048, ZAR1, AB020633, AL833170, BC050336, | 0           | 1 | 0.00 | 0.00 |
| 4q#63531_63552    | 4  | 137953945-138617115 | 663171  |                                                   | 0           | 1 | 0.00 | 0.00 |
| 6p#83105_83108    | 6  | 27884381-27890825   | 6445    | HIST1H2AI, BC062305, HIST1H2AJ                    | 0           | 1 | 0.00 | 0.00 |
| 6p#83119_83128    | 6  | 27937810-27969222   | 31413   | 2AL, HIST1H3I, HIST1H4L, HIST1H3J, HIST1H2AM, HIS | 0           | 1 | 0.00 | 0.00 |
| 6p#84552_84792    | 6  | 39279911-41887453   | 2607543 | TF130, NFYA, AK002098, BX648193, LOC221442, TREM  | 0           | 1 | 0.00 | 0.00 |
| 6p#84821_84890    | 6  | 42101823-42734520   | 632698  | 5, TBN, AK123786, GUCA1A, GUCA1B, MRPS10, TRER    | 0           | 1 | 0.00 | 0.00 |
| 6p#84891_84894    | 6  | 42741716-42766752   | 25037   | UBR2                                              | 0           | 1 | 0.00 | 0.00 |
| 6p#84921_84946    | 6  | 42968946-43097699   | 128754  | F161347, AK092088, GNMT, PEX6, PPP2R5D, MEA1, I   | 0           | 1 | 0.00 | 0.00 |
| 6p#85121_85129    | 6  | 44396299-44445837   | 49539   | AK126641, SPATS1                                  | 0           | 1 | 0.00 | 0.00 |
| 6p#85131_85169    | 6  | 44466051-45040241   | 574191  | CDC5L, AB007892, AF064804, SUPT3H                 | 0           | 1 | 0.00 | 0.00 |
| 10q#138329_138358 | 10 | 126251604-126507369 | 255766  | LHPP, FAM53B, AK023081, LOC399818, KIAA0157       | Inf         | 1 | 0.02 | 0.00 |
| 22q#223847_223851 | 22 | 37233216-37266405   | 33190   | DMC1                                              | 0           | 1 | 0.00 | 0.00 |
| 22q#223873_223915 | 22 | 37396985-37678129   | 281145  | MM22, JOSD1, GTPBP1, UNC84B, DNAL4, NPTXR, CB     | 0           | 1 | 0.00 | 0.00 |
| 22q#223916_223921 | 22 | 37683612-37709985   | 26374   | APOBEC3A, APOBEC3B                                | 0           | 1 | 0.00 | 0.00 |
| 22q#223922_223988 | 22 | 37713223-38152282   | 439060  | 0, APOBEC3F, APOBEC3G, ARP10, CBX7, AK074445, A   | 0           | 1 | 0.00 | 0.00 |
| 22q#223992_224024 | 22 | 38192883-38417255   | 224373  | GAT3, AL136768, FLJ20232, ATF4, RPS19BP1, CACNA   | 0           | 1 | 0.00 | 0.00 |
| 22q#224032_224054 | 22 | 38477236-38668771   | 191536  | FLJ25421, GRAP2                                   | 0           | 1 | 0.00 | 0.00 |
| 5q#70715_70719    | 5  | 50876545-51025257   | 148713  |                                                   | 0           | 1 | 0.00 | 0.00 |
| 5p#68174_68178    | 5  | 9670903-9683132     | 12230   | TAS2R1                                            | 0           | 1 | 0.00 | 0.00 |
| 5p#68218_68228    | 5  | 10339548-10419407   | 79860   | LOC134147, MARCH6                                 | 0           | 1 | 0.00 | 0.00 |
| 5p#67656_67657    | 5  | 2262331-2271813     | 9483    |                                                   | 0           | 1 | 0.00 | 0.00 |
| 5p#68154_68173    | 5  | 9493670-9660261     | 166592  | SEMA5A                                            | 0           | 1 | 0.00 | 0.00 |
| 5p#68179_68184    | 5  | 9693885-9744889     | 51005   | BC031253                                          | 0           | 1 | 0.00 | 0.00 |
| 5p#67658_67678    | 5  | 2295974-2553070     | 257097  |                                                   | 0           | 1 | 0.00 | 0.00 |
| 16p#186134_186135 | 16 | 732200-738327       | 6128    |                                                   | 0.692294348 | 1 | 0.02 | 0.02 |
| 16p#186101_186120 | 16 | 548509-657817       | 109309  | DC146325, FLJ36208, FIGQ, RAB40C, WFIKKN1, C16orf | 0.692294348 | 1 | 0.02 | 0.02 |
| 16p#186137_186146 | 16 | 749806-796289       | 46484   | MSLN, MPFL, RPUSD1, CHTF18, LOC388199             | 0.692294348 | 1 | 0.02 | 0.02 |
| 17q#195845_195879 | 17 | 29546007-29936918   | 390912  | 2, CCL7, CCL11, CCL8, CCL13, CCL1, FLJ44815, TMEM | Inf         | 1 | 0.02 | 0.00 |
| 17q#195981_195998 | 17 | 30969234-31118181   | 148948  | P2B1, RASL10B, GAS2L2, AK122604, C17orf50, MMP2   | 0           | 1 | 0.00 | 0.00 |
| 17q#195829_195834 | 17 | 29373544-29421687   | 48144   | ACCN1                                             | 0           | 1 | 0.00 | 0.00 |
| 17q#196158_196166 | 17 | 32954357-33032933   | 78577   | AP1GBP1                                           | 0.692294348 | 1 | 0.02 | 0.02 |
| 17q#196036_196039 | 17 | 31356223-31375450   | 19228   | CCL23                                             | 0           | 1 | 0.00 | 0.00 |
| 17q#196224_196231 | 17 | 34063901-34116301   | 52401   | MLLT6                                             | 1.398928118 | 1 | 0.03 | 0.02 |
| 17q#196040_196052 | 17 | 31384281-31456690   | 72410   | CCL18, AK024994, CCL3, CCL4                       | 0           | 1 | 0.00 | 0.00 |
| 17q#196205_196211 | 17 | 33820936-33902072   | 81137   | AB040934                                          | 1.398928118 | 1 | 0.03 | 0.02 |
| 17q#196217_196223 | 17 | 33966642-34031410   | 64769   | SNIP                                              | 1.398928118 | 1 | 0.03 | 0.02 |
| 17q#196270_196274 | 17 | 34354802-34382479   | 27678   | FBXO47                                            | 1.398928118 | 1 | 0.03 | 0.02 |
| 16p#188887_188897 | 16 | 30790607-30849558   | 58952   | BC058863, BCL7C, CTF1, AK090544, FBXL19           | Inf         | 1 | 0.02 | 0.00 |
| 16p#188880_188886 | 16 | 30733962-30785115   | 51154   | BC058863                                          | Inf         | 1 | 0.02 | 0.00 |
| 16p#188898_188914 | 16 | 30854651-30924287   | 69637   | FBXL19, MGC13024, SETD1A, HSD3B7, STX1B2          | Inf         | 1 | 0.02 | 0.00 |
| 16p#186450_186454 | 16 | 2844801-2874224     | 29424   | PRSS22, LOC114984                                 | 1.398928118 | 1 | 0.03 | 0.02 |
| 16p#188705_188710 | 16 | 29233146-29528249   | 295104  | AK023827, BOLA2                                   | 1.398928118 | 1 | 0.02 | 0.00 |
| 16p#186438_186449 | 16 | 2789909-2841655     | 51747   | PRSS21, LOC124220, MGC52282                       | 1.398928118 | 1 | 0.03 | 0.02 |
| 16p#188694_188701 | 16 | 29050535-29146145   | 95611   |                                                   | Inf         | 1 | 0.02 | 0.00 |
| 1q#16594_16663    | 1  | 212183435-212808335 | 624901  | KCTD3, USH2A                                      | 0.692294348 | 1 | 0.02 | 0.02 |
| 1q#16680_16682    | 1  | 213000487-213045508 | 45022   |                                                   | 0.692294348 | 1 | 0.02 | 0.02 |

|                   |    |                     |         |                                                    |             |   |      |      |
|-------------------|----|---------------------|---------|----------------------------------------------------|-------------|---|------|------|
| 1q#16582_16590    | 1  | 211893732-212135848 | 242117  | KCTD3                                              | 0.686886232 | 1 | 0.03 | 0.05 |
| 17q#196054_196056 | 17 | 31468896-31486599   | 17704   |                                                    | 0           | 1 | 0.00 | 0.00 |
| 17q#196057_196059 | 17 | 31504564-31891594   | 387031  |                                                    | 0           | 1 | 0.00 | 0.00 |
| 5q#79990_79999    | 5  | 172320700-172405587 | 84888   | RPL26L1, ATP6VOE                                   | 0           | 1 | 0.00 | 0.00 |
| 14q#170096_170097 | 14 | 21944246-21951353   | 7108    | BC063432                                           | 0           | 1 | 0.00 | 0.00 |
| 1q#14349_14376    | 1  | 183009892-183281480 | 271589  | PRG4, TPR, C1orf27, PDC                            | 1.398928118 | 1 | 0.03 | 0.02 |
| 1q#10452_10457    | 1  | 143480571-143551133 | 70563   | AF379624, NBPF11                                   | Inf         | 1 | 0.02 | 0.00 |
| 16q#191001_191007 | 16 | 68706240-68754278   | 48039   | PDPR, BC078143                                     | 0           | 1 | 0.00 | 0.00 |
| 14q#174248_174259 | 14 | 69017423-69106404   | 88982   | AK126770, C14orf162                                | 0           | 1 | 0.00 | 0.00 |
| 14q#174288_174310 | 14 | 69323443-69502438   | 178996  | SLC10A1, SMOC1                                     | 0           | 1 | 0.00 | 0.00 |
| 14q#174328_174398 | 14 | 69654655-70296984   | 642330  | SYNJ2BP, ADAM21, BC047939, ADAM20, MED6, AK093     | 0           | 1 | 0.00 | 0.00 |
| 14q#174439_174447 | 14 | 70741907-70858706   | 116800  | AK126981                                           | 0           | 1 | 0.00 | 0.00 |
| 14q#174522_174594 | 14 | 71641452-72225117   | 583666  | RGS6, DPF3                                         | 0           | 1 | 0.00 | 0.00 |
| 14q#174186_174204 | 14 | 68523652-68687540   | 163889  | WDR22                                              | 0           | 1 | 0.00 | 0.00 |
| 14q#174232_174247 | 14 | 68903154-69008517   | 105364  | ERH, SLC39A9, AK222547                             | 0           | 1 | 0.00 | 0.00 |
| 14q#174311_174327 | 14 | 69508175-69638720   | 130546  | SMOC1, SLC8A3                                      | 0           | 1 | 0.00 | 0.00 |
| 14q#174520_174521 | 14 | 71622558-71630163   | 7606    | RGS6                                               | 0           | 1 | 0.00 | 0.00 |
| 14q#174260_174287 | 14 | 69112052-69319409   | 207358  | KIAA0247, BC040209, SFRS5, SLC10A1                 | 0           | 1 | 0.00 | 0.00 |
| 14q#177887_177889 | 14 | 105907191-105934902 | 27712   | AK125079                                           | 0           | 1 | 0.00 | 0.00 |
| 14q#174143_174185 | 14 | 68102796-68514787   | 411992  | AD5L1L, BX248061, X79067, ZFP36L1, FLJ39779, ACT1  | 0           | 1 | 0.00 | 0.00 |
| 14q#174205_174231 | 14 | 68693625-68895915   | 202291  | AK097819, EXDL2, GALNTL1                           | 0           | 1 | 0.00 | 0.00 |
| 14q#169757_169789 | 14 | 19765060-19971650   | 206591  | 20999, OR11H4, TTC5, CCNB1IP1, PARP2, BX640983,    | 0           | 1 | 0.00 | 0.00 |
| 14q#170005_170013 | 14 | 21225749-21291539   | 65791   | BC063432                                           | 0           | 1 | 0.00 | 0.00 |
| 12p#153775_153795 | 12 | 33971056-34647476   | 676421  | ALG10, AK023061                                    | 0           | 1 | 0.00 | 0.00 |
| 11p#140585_140640 | 11 | 12251499-12852667   | 601169  | MICALCL, PARVA, AL833289, TEAD1                    | 0           | 1 | 0.00 | 0.00 |
| 11p#140663_140667 | 11 | 13213925-13269880   | 55956   | CR749855, ARNTL                                    | 0           | 1 | 0.00 | 0.00 |
| 10p#128659_128675 | 10 | 6539143-6657415     | 118273  | PRKCQ                                              | 0           | 1 | 0.00 | 0.00 |
| 14q#170001_170004 | 14 | 21202798-21221671   | 18874   | BC063432                                           | 0           | 1 | 0.00 | 0.00 |
| 6q#87098_87099    | 6  | 74866896-74884587   | 17692   | AF086303                                           | 0           | 1 | 0.00 | 0.00 |
| 11p#140669_140709 | 11 | 13288083-13787179   | 499097  | ARNTL, BTBD10, PTH, MLSTD2                         | 0           | 1 | 0.00 | 0.00 |
| 14q#170391_170422 | 14 | 23949696-24172888   | 223193  | 054752, KIAA0323, C14orf124, AK056368, CMA1, CTSG  | 0           | 1 | 0.00 | 0.00 |
| 10p#128654_128658 | 10 | 6493783-6526587     | 32805   | PRKCQ                                              | 0           | 1 | 0.00 | 0.00 |
| 10p#128676_128677 | 10 | 6667573-6673655     | 6083    | AK096400                                           | 0           | 1 | 0.00 | 0.00 |
| 10p#128715_128744 | 10 | 7185792-7463784     | 277993  | AK096400, SFMBT2                                   | 0           | 1 | 0.00 | 0.00 |
| 10p#129143_129203 | 10 | 13097207-13682337   | 585131  | 2, OPTN, MCM10, C10orf49, PHYH, SEPHS1, C10orf30,  | Inf         | 1 | 0.02 | 0.00 |
| 12p#153554_153555 | 12 | 31226529-31237552   | 11024   |                                                    | 0           | 1 | 0.00 | 0.00 |
| 12q#153796_153841 | 12 | 36160215-37476443   | 1316229 | BC040886, CPNE8                                    | 0           | 1 | 0.00 | 0.00 |
| 12q#153861_153890 | 12 | 37887299-38259648   | 372350  | KIF21A, ABCD2                                      | 0           | 1 | 0.00 | 0.00 |
| 6q#87100_87110    | 6  | 74893365-75060299   | 166935  | AF086303                                           | 0           | 1 | 0.00 | 0.00 |
| 4q#67139_67143    | 4  | 187778560-187813104 | 34545   | BC034307                                           | 0           | 1 | 0.00 | 0.00 |
| 18q#203016_203089 | 18 | 30816237-31555880   | 739644  | K027384, ZNF271, ZNF24, ZNF396, AK095502, C18orf37 | 0           | 1 | 0.00 | 0.00 |
| 10p#128078_128122 | 10 | 460172-892159       | 431988  | DIP2C, LARP5                                       | 0           | 1 | 0.00 | 0.00 |
| 10p#128137_128154 | 10 | 1031876-1141309     | 109434  | GTPBP4, IDI2, C10orf110, IDI1, WDR37               | 0           | 1 | 0.00 | 0.00 |
| 14q#170383_170390 | 14 | 23897671-23941282   | 43612   | NFATC4, BC065283                                   | 0           | 1 | 0.00 | 0.00 |
| 12q#153891_153969 | 12 | 38266277-39088151   | 821875  | ABCD2, C12orf40, AK097445, SLC2A13, LRRK2          | 0           | 1 | 0.00 | 0.00 |
| 12q#154069_154379 | 12 | 40689134-44563633   | 3874500 | . BC042591, ADAMTS20, BX648207, PUS7L, IRAK4, PI   | 0           | 1 | 0.00 | 0.00 |
| 11q#144455_144459 | 11 | 63443029-63465520   | 22492   | BC010608, NAT11                                    | Inf         | 1 | 0.02 | 0.00 |
| 11p#141509_141527 | 11 | 23373296-23970703   | 597408  |                                                    | 0           | 1 | 0.00 | 0.00 |
| 12p#153556_153559 | 12 | 31248212-31284290   | 36079   |                                                    | 0           | 1 | 0.00 | 0.00 |
| 12p#153716_153774 | 12 | 32923091-33922263   | 999173  | PKP2, Z83955, SYT10                                | 0           | 1 | 0.00 | 0.00 |
| 12q#153842_153860 | 12 | 37491177-37841128   | 349952  | CPNE8, AK098593                                    | 0           | 1 | 0.00 | 0.00 |
| 4q#67144_67145    | 4  | 187818906-187824258 | 5353    |                                                    | 0           | 1 | 0.00 | 0.00 |
| 11q#144409_144414 | 11 | 63076890-63108076   | 31187   | HRASLS2, HRASLS3                                   | Inf         | 1 | 0.02 | 0.00 |
| 11q#144453_144454 | 11 | 63432278-63436835   | 4558    | MARK2, RCOR2                                       | Inf         | 1 | 0.02 | 0.00 |
| 10p#128155_128162 | 10 | 1151116-1198509     | 47394   | WDR37, LOC399706                                   | 0           | 1 | 0.00 | 0.00 |

|                   |    |                     |         |                                                   |             |   |      |      |
|-------------------|----|---------------------|---------|---------------------------------------------------|-------------|---|------|------|
| 14q#170379_170382 | 14 | 23877283-23893079   | 15797   | RIPK3                                             | 0           | 1 | 0.00 | 0.00 |
| 19p#208717_208780 | 19 | 19066510-19571128   | 504619  | F2, SF4, AB020699, KIAA0892, AK125974, GATAD2A, A | 0           | 1 | 0.00 | 0.00 |
| 11p#141028_141035 | 11 | 17520330-17592552   | 72223   | USH1C, AK128214                                   | 0           | 1 | 0.00 | 0.00 |
| 11p#141211_141221 | 11 | 19320178-19466559   | 146382  | AB063115                                          | 0           | 1 | 0.00 | 0.00 |
| 14q#170364_170369 | 14 | 23812600-23834438   | 21839   | CR625243, DHRS1                                   | 0           | 1 | 0.00 | 0.00 |
| 12q#153970_154068 | 12 | 39106192-40661514   | 1555323 | AK093065, CNTN1, PDZRN4                           | 0           | 1 | 0.00 | 0.00 |
| 12q#154380_154399 | 12 | 44573567-44805205   | 231639  | ARID2, SFRS2IP, AF030234                          | 0           | 1 | 0.00 | 0.00 |
| 12q#154416_154422 | 12 | 45024226-45053301   | 29076   | SLC38A2, BC039429                                 | 0           | 1 | 0.00 | 0.00 |
| 12q#154517_154523 | 12 | 46464949-46496372   | 31424   | HDAC7A, BC064840                                  | 0           | 1 | 0.00 | 0.00 |
| 4q#67146_67149    | 4  | 187829560-187850741 | 21182   | MTNR1A                                            | 0           | 1 | 0.00 | 0.00 |
| 12q#160242_160243 | 12 | 112826350-112838453 | 12104   | RBM19                                             | 0           | 1 | 0.00 | 0.00 |
| 11q#144341_144363 | 11 | 62429652-62620051   | 190400  | CHRM1, SLC22A6, SLC22A8                           | Inf         | 1 | 0.02 | 0.00 |
| 11q#144384_144408 | 11 | 62861317-63070562   | 209246  | SLC22A9, AK055392, HRASLS5, LGALS12, RARRES3      | Inf         | 1 | 0.02 | 0.00 |
| 11q#144415_144417 | 11 | 63116973-63134726   | 17754   | HRASLS3                                           | Inf         | 1 | 0.02 | 0.00 |
| 1p#307_308        | 1  | 3554149-3558855     | 4707    |                                                   | 0           | 1 | 0.00 | 0.00 |
| 1p#304_306        | 1  | 3521345-3541821     | 20477   | MEGF6                                             | 0           | 1 | 0.00 | 0.00 |
| 4q#64827_64857    | 4  | 154844555-155163102 | 318548  | KIAA0922, BC032464, TLR2, RNF175, SFRP2           | 0           | 1 | 0.00 | 0.00 |
| 14q#170370_170378 | 14 | 23837514-23873305   | 36792   | DHRS1, C14orf21, CIDEB, LTB4R, CR618079, ADCY4    | 0           | 1 | 0.00 | 0.00 |
| 19p#208781_208790 | 19 | 19577706-19625938   | 48233   | PBX4, EDG4, GMIP, ATP13A1                         | 0           | 1 | 0.00 | 0.00 |
| 12q#154543_154619 | 12 | 46678406-47335071   | 656666  | 56, AK056127, AL110189, DKFZP79L1853, H1FNT, AY   | 0           | 1 | 0.00 | 0.00 |
| 12q#155016_155018 | 12 | 50214554-50238290   | 23737   | U03495                                            | 0           | 1 | 0.00 | 0.00 |
| 11q#144328_144332 | 11 | 62339001-62364723   | 25723   | STX5, WDR74                                       | 0.692294348 | 1 | 0.02 | 0.02 |
| 11q#144339_144340 | 11 | 62417274-62426378   | 9105    |                                                   | 0.692294348 | 1 | 0.02 | 0.02 |
| 1p#300_303        | 1  | 3488169-3509612     | 21444   | MEGF6                                             | 0           | 1 | 0.00 | 0.00 |
| 3q#48032_48091    | 3  | 126749713-127598937 | 849225  | 600848, LOC200810, ROPN1B, SLC41A3, ALDH1L1, B    | 0           | 1 | 0.00 | 0.00 |
| 3q#48141_48149    | 3  | 128051039-128123566 | 72528   | CHCHD6                                            | 0           | 1 | 0.00 | 0.00 |
| 3q#48167_48168    | 3  | 128271086-128317823 | 46738   |                                                   | 0           | 1 | 0.00 | 0.00 |
| 3q#48297_48310    | 3  | 129686209-129802665 | 116457  | GATA2, CR959360, C3orf27                          | 0           | 1 | 0.00 | 0.00 |
| 6p#85974_85976    | 6  | 55103800-55140384   | 36585   |                                                   | 0           | 1 | 0.00 | 0.00 |
| 19q#211543_211570 | 19 | 56342638-56561116   | 218479  | C7, BC045766, CD33, FLJ40235, CR922222, BC032383  | Inf         | 1 | 0.02 | 0.00 |
| 12q#160244_160431 | 12 | 112850651-115990612 | 3139962 | ; BC035415, AK026320, THRAP2, FLJ42957, C12orf49, | 0           | 1 | 0.00 | 0.00 |
| 14q#170270_170316 | 14 | 23097001-23619835   | 522835  | RS2, C14orf165, BX647964, DHRS4, AY616182, DHRS4, | 0           | 1 | 0.00 | 0.00 |
| 19p#208457_208478 | 19 | 17019714-17212967   | 193254  | Y-SAR-48, AB209997, MYO9B, MDS032, FLJ22709, NR2  | 0.692294348 | 1 | 0.02 | 0.02 |
| 11q#144202_144204 | 11 | 61439746-61456530   | 16785   | RAB31L1, BC051820                                 | 0           | 1 | 0.00 | 0.00 |
| 11q#144333_144338 | 11 | 62373800-62412889   | 39090   | SLC3A2                                            | 0.692294348 | 1 | 0.02 | 0.02 |
| 1p#1540_1541      | 1  | 16551324-16561593   | 10270   | AK130020                                          | 0           | 1 | 0.00 | 0.00 |
| 6p#85977_85985    | 6  | 55152687-55236477   | 83791   | HCRTR2                                            | 0           | 1 | 0.00 | 0.00 |
| 11q#144248_144249 | 11 | 61863960-61881203   | 17244   | ASRGL1                                            | 0           | 1 | 0.00 | 0.00 |
| 12q#154400_154415 | 12 | 44838411-45008069   | 169659  | AK024263, SLC38A1                                 | 0           | 1 | 0.00 | 0.00 |
| 12q#154423_154431 | 12 | 45058801-45134433   | 75633   | BC014370                                          | 0           | 1 | 0.00 | 0.00 |
| 12q#154500_154501 | 12 | 46359770-46370607   | 10838   | FLJ21908                                          | 0           | 1 | 0.00 | 0.00 |
| 12q#154502_154516 | 12 | 46377648-46457795   | 80148   | FLJ21908, P11, AL831948, RAPGEF3, FLJ20489        | 0           | 1 | 0.00 | 0.00 |
| 12q#154538_154542 | 12 | 46647543-46668446   | 20904   | TMEM106C, COL2A1                                  | 0           | 1 | 0.00 | 0.00 |
| 12q#154620_154642 | 12 | 47340334-47503930   | 163597  | C12orf41, CCNT1, AK131005, ADCY6, CACNB3          | 0           | 1 | 0.00 | 0.00 |
| 12q#158524_158527 | 12 | 94269355-94332803   | 63449   |                                                   | 0           | 1 | 0.00 | 0.00 |
| 12q#160432_160519 | 12 | 116005062-116866798 | 861737  | U79257, FBXO21, AF131796, NOS1, KSR2              | 0           | 1 | 0.00 | 0.00 |
| 12q#160694_160711 | 12 | 118991152-119107148 | 115997  | CDC64, RAB35, CR602867, GCN1L1, RPLP0, CR60746    | 0           | 1 | 0.00 | 0.00 |
| 12q#160712_160730 | 12 | 119111030-119244228 | 133199  | PXN, BC053934, SIRT4, PLA2G1B, MSI1               | 0           | 1 | 0.00 | 0.00 |
| 12q#160853_160871 | 12 | 120179555-120338337 | 158783  | CAMKK2, BC045686, ANAPC5, RNF34, FBXL10           | 0           | 1 | 0.00 | 0.00 |
| 12q#160872_160904 | 12 | 120344791-120628635 | 283845  | L10, TMEM142A, AK027372, MORN3, AY177732, AK12    | 0           | 1 | 0.00 | 0.00 |
| 12q#160922_160954 | 12 | 120760973-121153516 | 392544  | AK057510, PSMD9, WDR66, BCL7A, MLXIP, AB020674    | 0           | 1 | 0.00 | 0.00 |
| 12q#160955_160990 | 12 | 121159001-121416055 | 257055  | LRR43, B3GNT4, DIABLO, AL833244, VPS33A, RSN      | 0           | 1 | 0.00 | 0.00 |
| 19p#208449_208456 | 19 | 16940004-17011201   | 71198   | CPAMD8                                            | 0.692294348 | 1 | 0.02 | 0.02 |
| 19p#208479_208526 | 19 | 17221810-17554950   | 333141  | DA1, TMEM16H, GTPBP3, PLVAP, BST2, BC033873, AK   | 0.692294348 | 1 | 0.02 | 0.02 |
| 19q#209718_209734 | 19 | 40944669-41049607   | 104939  | C14orf137, SNX26, AK055260, PRODH2, NPHS1, KIRRE  | 0           | 1 | 0.00 | 0.00 |

|                   |    |                     |         |                                                     |             |   |      |      |
|-------------------|----|---------------------|---------|-----------------------------------------------------|-------------|---|------|------|
| 19q#211506_211542 | 19 | 56134961-56333999   | 199039  | 7, KLK8, KLK9, KLK10, KLK11, KLK12, KLK13, KLK14, A | Inf         | 1 | 0.02 | 0.00 |
| 1q#10920_10925    | 1  | 148993070-149027791 | 34722   | CR933683, HRNR                                      | Inf         | 1 | 0.02 | 0.00 |
| 1q#14786_14811    | 1  | 191721683-192616125 | 894443  |                                                     | 1.398928118 | 1 | 0.03 | 0.02 |
| 1q#10405_10409    | 1  | 142940373-142966732 | 26360   | AF379624, POLR3GL, ANKRD34, LIX1L                   | Inf         | 1 | 0.02 | 0.00 |
| 1q#10410_10449    | 1  | 142974897-143236313 | 261417  | PEX11B, ITGA10, ANKRD35, PIAS3, NUDT17, POLR3C      | Inf         | 1 | 0.02 | 0.00 |
| 3p#41519_41524    | 3  | 42742471-42767815   | 25345   | CCDC13                                              | 0           | 1 | 0.00 | 0.00 |
| 3p#41580_41766    | 3  | 43320136-45381541   | 2061406 | ZNF167, ZNF660, BX538171, ZNF197, ZNF35, ZNF50      | 0           | 1 | 0.00 | 0.00 |
| 3p#41071_41078    | 3  | 38074690-38134999   | 60310   | DLEC1                                               | 0           | 1 | 0.00 | 0.00 |
| 3p#41447_41511    | 3  | 42031324-42697493   | 666170  | CK, LYZL4, AK056819, VIPR1, SEC22C, CR595143, SS    | 0           | 1 | 0.00 | 0.00 |
| 3p#41526_41579    | 3  | 42791279-43312141   | 520863  | 610139, CYP8B1, BC011588, BC080592, ZNF662, AK09    | 0           | 1 | 0.00 | 0.00 |
| 1p#10034_10037    | 1  | 116328303-116367330 | 39028   | C1orf161                                            | 0           | 1 | 0.00 | 0.00 |
| 3p#41053_41070    | 3  | 37984306-38068499   | 84194   | CTDSP1, AX810712, VILL, PLCD1, DLEC1                | 0           | 1 | 0.00 | 0.00 |
| 3p#41079_41365    | 3  | 38139188-41233095   | 3093908 | 8, GORASP1, TTC21A, AXUD1, CMYA1, CX3CR1, CCF       | 0           | 1 | 0.00 | 0.00 |
| 3p#41435_41446    | 3  | 41913093-42013742   | 100650  | AK000581                                            | 0           | 1 | 0.00 | 0.00 |
| 3p#41512_41518    | 3  | 42703213-42732828   | 29616   | KBTBD5, GUP1, CCDC13                                | 0           | 1 | 0.00 | 0.00 |
| 3p#41366_41434    | 3  | 41241584-41901145   | 659562  | CTNNB1, BC018795, AK093396, AK000581                | 0           | 1 | 0.00 | 0.00 |
| 5p#67431_67432    | 5  | 173404-183990       | 10587   |                                                     | 0           | 1 | 0.00 | 0.00 |
| 20p#212848_212855 | 20 | 3056503-3096353     | 39851   | UBOX5, ProSAPIP1                                    | 0           | 1 | 0.00 | 0.00 |
| 20p#212679_212686 | 20 | 1516966-1586106     | 69141   | SIRPB1, SIRPG                                       | 0           | 1 | 0.00 | 0.00 |
| 7q#106693_106706  | 7  | 150118634-150176611 | 57978   | NOS3, ATG9B, ABCB8                                  | 0           | 1 | 0.00 | 0.00 |
| 11q#144896_144899 | 11 | 66228493-66254780   | 26288   | SPTBN2, AF079569                                    | 1.044194198 | 1 | 0.05 | 0.05 |
| 11q#144900_144901 | 11 | 66260340-66272557   | 12218   | FLJ22531                                            | 1.413401461 | 1 | 0.07 | 0.05 |
| 11q#144902_144916 | 11 | 66283129-66384545   | 101417  | FLJ22531, RCE1, PC                                  | 1.413401461 | 1 | 0.07 | 0.05 |
| 11q#144880_144882 | 11 | 66136270-66143030   | 6761    | RBM14                                               | 1.044194198 | 1 | 0.05 | 0.05 |
| 11p#139220_139222 | 11 | 484533-498116       | 13584   | RNH1, AK095144                                      | 0           | 1 | 0.00 | 0.00 |
| 11p#139223_139227 | 11 | 505016-531502       | 26487   | HRAS, LRRC56                                        | 0           | 1 | 0.00 | 0.00 |
| 10q#132812_132860 | 10 | 66103552-67307970   | 1204419 | BC050028                                            | 0           | 1 | 0.00 | 0.00 |
| 10q#134256_134261 | 10 | 80737773-80769595   | 31823   | RAI17                                               | Inf         | 1 | 0.02 | 0.00 |
| 4q#60049_60108    | 4  | 87460452-88020088   | 559637  | MAPK10, PTPN13                                      | 0           | 1 | 0.00 | 0.00 |
| 10q#133886_133903 | 10 | 76538335-76668926   | 130592  | DUSP13, SAMD8, VDACC2                               | Inf         | 1 | 0.02 | 0.00 |
| 10q#134262_134278 | 10 | 80774609-80904813   | 130205  | PPIF, C10orf56                                      | Inf         | 1 | 0.02 | 0.00 |
| 4q#61333_61349    | 4  | 102474355-102623138 | 148784  | PPP3CA                                              | 0           | 1 | 0.00 | 0.00 |
| 4q#59850_59855    | 4  | 84896721-85007065   | 110345  |                                                     | 0           | 1 | 0.00 | 0.00 |
| 4q#60045_60048    | 4  | 87407887-87443036   | 35150   | MAPK10                                              | 0           | 1 | 0.00 | 0.00 |
| 4q#60536_60542    | 4  | 92397597-92444806   | 47210   | AB051467                                            | 0           | 1 | 0.00 | 0.00 |
| 10q#133904_134027 | 10 | 76675253-77998251   | 1322999 | AK023445, ZNF503, AK024492, CR933639, C10orf11      | Inf         | 1 | 0.02 | 0.00 |
| 10q#134159_134165 | 10 | 79399017-79448952   | 49936   | AF194537, POLR3A                                    | Inf         | 1 | 0.02 | 0.00 |
| 10q#134248_134255 | 10 | 80668229-80727500   | 59272   | RAI17                                               | Inf         | 1 | 0.02 | 0.00 |
| 11p#143308_143313 | 11 | 49087250-49142789   | 55540   | FOLH1                                               | Inf         | 1 | 0.02 | 0.00 |
| 4q#59764_59768    | 4  | 84105665-84135511   | 29847   | SEC31L1                                             | 0           | 1 | 0.00 | 0.00 |
| 11p#143314_143333 | 11 | 49156877-49557672   | 400796  | FOLH1                                               | Inf         | 1 | 0.02 | 0.00 |
| 4q#59702_59751    | 4  | 83512199-83983996   | 471798  | HNRPD, HNRPDL, MASA, AK023055, C4orf11, SCD5        | 0           | 1 | 0.00 | 0.00 |
| 15q#179532_179555 | 15 | 38378961-38471594   | 92634   | 87873, BC036424, FLJ43339, BC061640, DISP2, BC037   | 0           | 1 | 0.00 | 0.00 |
| 11p#143334_143337 | 11 | 49576883-49655726   | 78844   |                                                     | Inf         | 1 | 0.02 | 0.00 |
| 14q#173069_173113 | 14 | 57778846-58098240   | 319395  | SMA3, BC034618, ARID4A, UNQ9438, TIMM9, KIAA058     | 0           | 1 | 0.00 | 0.00 |
| 14q#173447_173450 | 14 | 61352811-61410291   | 57481   |                                                     | 0           | 1 | 0.00 | 0.00 |
| 14q#173966_173985 | 14 | 66734762-66889459   | 154698  | C14orf54, MPP5, CR619369, ATP6V1D                   | 0           | 1 | 0.00 | 0.00 |
| 14q#173451_173472 | 14 | 61427835-61665207   | 237373  | SYTT16, AJ617628, CR626003, BX248751                | 0           | 1 | 0.00 | 0.00 |
| 14q#173490_173524 | 14 | 62191471-62504351   | 312881  | KCNH5                                               | 0           | 1 | 0.00 | 0.00 |
| 14q#173861_173878 | 14 | 65534616-65951996   | 417381  |                                                     | 0           | 1 | 0.00 | 0.00 |
| 12p#152251_152259 | 12 | 14649429-14718913   | 69485   | GUCY2C                                              | 0           | 1 | 0.00 | 0.00 |
| 12p#152321_152325 | 12 | 15231286-15269570   | 38285   | REG                                                 | 0           | 1 | 0.00 | 0.00 |
| 14q#173859_173860 | 14 | 65507701-65524818   | 17118   |                                                     | 0           | 1 | 0.00 | 0.00 |
| 12q#155938_155940 | 12 | 56633663-56644279   | 10617   | XRCC6BP1                                            | 0           | 1 | 0.00 | 0.00 |
| 3q#49256_49460    | 3  | 140496919-142826338 | 2329420 | AT3, CLSTN2, AK056411, TRIM42, SLC25A36, SPSB4,     | 0           | 1 | 0.00 | 0.00 |

|                   |    |                     |         |                                                   |             |   |      |      |
|-------------------|----|---------------------|---------|---------------------------------------------------|-------------|---|------|------|
| 11q#144448_144452 | 11 | 63408069-63429266   | 21198   | MARK2                                             | Inf         | 1 | 0.02 | 0.00 |
| 11q#144612_144633 | 11 | 64458487-64584890   | 126404  | DC283129, BC033501, BAF2, ARL2, AK096447, SNX15   | 0           | 1 | 0.00 | 0.00 |
| 3q#45533_45563    | 3  | 95145690-95472196   | 326507  | PROS1, ARL13B, DHFRL1, NSUN3, AK025762            | 0           | 1 | 0.00 | 0.00 |
| 3q#45638_45639    | 3  | 97583451-97609773   | 26323   |                                                   | 0           | 1 | 0.00 | 0.00 |
| 3q#45674_45688    | 3  | 98191800-98326610   | 134811  | AK092565                                          | 0           | 1 | 0.00 | 0.00 |
| 11q#144472_144496 | 11 | 63538441-63722081   | 183641  | LRP16, STIP1                                      | 0           | 1 | 0.00 | 0.00 |
| 11q#144606_144611 | 11 | 64427356-64456881   | 29526   | KIAA0404, PPP2R5B                                 | 0           | 1 | 0.00 | 0.00 |
| 10p#128188_128193 | 10 | 1411310-1457395     | 46086   | ADARB2                                            | 0           | 1 | 0.00 | 0.00 |
| 3q#45739_45767    | 3  | 98781194-99095431   | 314238  | BC031881, ARL6, AK130921, DKFZp667G2110           | 0           | 1 | 0.00 | 0.00 |
| 3q#45883_45934    | 3  | 100074787-101016835 | 942049  | DCBLD2, AK093118, COL8A1                          | 0           | 1 | 0.00 | 0.00 |
| 3q#46099_46143    | 3  | 102666475-103050405 | 383931  | MTD1, PCNP, ZBTB11, AK022880, RPL24, LRR1Q2, AL8  | 0           | 1 | 0.00 | 0.00 |
| 3q#46196_46250    | 3  | 103646779-105219332 | 1572554 | ZPLD1, BC070396                                   | 0           | 1 | 0.00 | 0.00 |
| 3q#46407_46517    | 3  | 108356697-109578807 | 1222111 | CDC54, BC042024, BBX, BC039365, BC039517, AK091   | 0           | 1 | 0.00 | 0.00 |
| 19q#211679_211702 | 19 | 57402198-57612587   | 210390  | Z1, ZNF480, AK097759, ZNF610, BC039903, AK092566, | Inf         | 1 | 0.02 | 0.00 |
| 19q#211874_211885 | 19 | 58980871-59009759   | 88889   | NALP12, AK057976, MYADM                           | Inf         | 1 | 0.02 | 0.00 |
| 11q#144497_144519 | 11 | 63728054-63816778   | 88725   | T22, DNAJC4, VEGFB, FKBP2, PPP1R14B, PLCB3, Z26   | 0           | 1 | 0.00 | 0.00 |
| 3q#45564_45565    | 3  | 95505849-95573645   | 67797   |                                                   | 0           | 1 | 0.00 | 0.00 |
| 3q#45578_45599    | 3  | 96112758-96371288   | 258531  | BC038721, BC063131                                | 0           | 1 | 0.00 | 0.00 |
| 3q#45623_45637    | 3  | 97182455-97572953   | 390499  |                                                   | 0           | 1 | 0.00 | 0.00 |
| 11q#144421_144442 | 11 | 63176495-63353788   | 177294  | DKFZP564J0863, RTN3, BC065479, LOC144097          | Inf         | 1 | 0.02 | 0.00 |
| 11q#144595_144605 | 11 | 64374591-64423862   | 49272   | EHD1, AK092802, KIAA0404                          | 0           | 1 | 0.00 | 0.00 |
| 12q#155934_155937 | 12 | 56599424-56625737   | 26314   | CR602022, XRCC6BP1                                | 0           | 1 | 0.00 | 0.00 |
| 11q#144520_144539 | 11 | 63819511-63914768   | 95258   | KCNK4, AF247042, ESRRA, PRDX5, CCDC88, RPS6KA,    | 0           | 1 | 0.00 | 0.00 |
| 3q#45935_46024    | 3  | 101023025-101817200 | 794176  | C1D23, BC020955, NIT2, TOMM70A, BC040562, TMEM4   | 0           | 1 | 0.00 | 0.00 |
| 3q#46036_46098    | 3  | 101934035-102660561 | 726527  | TFG, ABI3BP, IMPG2, SENP7                         | 0           | 1 | 0.00 | 0.00 |
| 19q#209975_210010 | 19 | 43460442-43757212   | 296771  | 1B, KCNK6, C19orf15, PSMD8, SPRED3, FAM98C, RAS   | Inf         | 1 | 0.02 | 0.00 |
| 3q#45600_45622    | 3  | 96392292-97154693   | 762402  | AK092228                                          | 0           | 1 | 0.00 | 0.00 |
| 19q#211610_211637 | 19 | 56872750-57072376   | 199627  | DC147650, HAS1, M60626, FPR1, FPRL1, FPRL2, BC03  | 0           | 1 | 0.00 | 0.00 |
| 3q#45566_45577    | 3  | 95613257-96084199   | 470943  |                                                   | 0           | 1 | 0.00 | 0.00 |
| 11q#144217_144223 | 11 | 61634943-61676391   | 41449   | INCENP                                            | 0           | 1 | 0.00 | 0.00 |
| 1p#1542_1544      | 1  | 16571625-16592510   | 20886   | AK130020                                          | Inf         | 1 | 0.02 | 0.00 |
| 3q#48154_48158    | 3  | 128170500-128208546 | 38047   | AK126748, PLXNA1                                  | 0           | 1 | 0.00 | 0.00 |
| 3q#48159_48162    | 3  | 128214870-128237625 | 22756   | PLXNA1                                            | 0           | 1 | 0.00 | 0.00 |
| 12q#158734_158742 | 12 | 97301214-97372878   | 71665   |                                                   | 0           | 1 | 0.00 | 0.00 |
| 19q#211291_211332 | 19 | 54504005-54756019   | 252015  | FLJ32658, TIP39, SLC17A7, NOP17, ALDH16A1, AY00   | 0           | 1 | 0.00 | 0.00 |
| 16p#188599_188612 | 16 | 28012170-28119254   | 107085  | XPO6                                              | 1.398928118 | 1 | 0.03 | 0.02 |
| 16p#189033_189034 | 16 | 31813189-31819016   | 5828    | ZNF267                                            | Inf         | 1 | 0.02 | 0.00 |
| 16p#189035_189037 | 16 | 31835555-31854891   | 19337   | ZNF267                                            | Inf         | 1 | 0.02 | 0.00 |
| 16p#188516_188518 | 16 | 27210048-27230627   | 20580   |                                                   | 1.398928118 | 1 | 0.03 | 0.02 |
| 16p#188583_188598 | 16 | 27783395-27992748   | 209354  | MGC18079, AK128775                                | 1.398928118 | 1 | 0.03 | 0.02 |
| 5p#67914_68153    | 5  | 6170467-9476461     | 3305995 | RD5A1, AK126802, POLS, LOC442132, ADCY2, BC0625   | 0           | 1 | 0.00 | 0.00 |
| 5p#68185_68217    | 5  | 9753149-10328659    | 575511  | BC031253, LOC134145, CCT5                         | 0           | 1 | 0.00 | 0.00 |
| 5p#68229_68424    | 5  | 10425663-13280760   | 2855098 | H6, ROPN1L, AK127412, AF056448, DAP, CTNND2, AY   | 0           | 1 | 0.00 | 0.00 |
| 5p#68425_68471    | 5  | 13319637-13981312   | 661676  | AK026756, DNAH5                                   | 0           | 1 | 0.00 | 0.00 |
| 5p#67679_67713    | 5  | 2561476-2966319     | 404844  | IRX2, CEI                                         | 0           | 1 | 0.00 | 0.00 |
| 5p#69119_69220    | 5  | 23207006-25041846   | 1834841 | 315093, DQ388610, PRDM9, AK092155, CDH10, BC040   | 0           | 1 | 0.00 | 0.00 |
| 5p#69236_69315    | 5  | 25454035-27629033   | 2174999 | CDH9, BC046201                                    | Inf         | 1 | 0.02 | 0.00 |
| 5p#69228_69235    | 5  | 25258652-25411882   | 153231  | BC036004                                          | Inf         | 1 | 0.02 | 0.00 |
| 20p#214614_214635 | 20 | 24435154-24728453   | 293300  | C20orf39                                          | 0           | 1 | 0.00 | 0.00 |
| 16p#187603_187636 | 16 | 15733873-15995932   | 262060  | MYH11, AK027135, C16orf63, ABCC1                  | 1.398928118 | 1 | 0.03 | 0.02 |
| 16p#186490_186495 | 16 | 3088138-3116073     | 27936   | AK074736, BC001809, ZNF205                        | 1.398928118 | 1 | 0.03 | 0.02 |
| 16p#186496_186500 | 16 | 3121643-3143164     | 21522   | AF098968, ZNF213, AF098666                        | 1.398928118 | 1 | 0.03 | 0.02 |
| 16p#188977_188978 | 16 | 31315754-31321971   | 6218    | ITGAD                                             | Inf         | 1 | 0.02 | 0.00 |
| 16p#188992_188995 | 16 | 31400800-31412127   | 11328   | SLC5A2, C16orf58                                  | Inf         | 1 | 0.02 | 0.00 |
| 16p#188614_188624 | 16 | 28133442-28237474   | 104033  | AB075516, SBK1                                    | 1.398928118 | 1 | 0.03 | 0.02 |

|            |        |    |                     |         |                                                    |             |   |      |      |
|------------|--------|----|---------------------|---------|----------------------------------------------------|-------------|---|------|------|
| 16p#188996 | 189006 | 16 | 31422339-31485749   | 63411   | C16orf58, ERAF                                     | Inf         | 1 | 0.02 | 0.00 |
| 16p#186455 | 186488 | 16 | 2881232-3077336     | 196105  | PKMYT1, AK098017, CLDN6, TNFRSF12A, THOC6, AL      | 1.398928118 | 1 | 0.03 | 0.02 |
| 16p#188625 | 188626 | 16 | 28242579-28246227   | 3649    | SBK1, AB075516                                     | 1.398928118 | 1 | 0.03 | 0.02 |
| 16p#188645 | 188658 | 16 | 28503138-28762218   | 259081  | CDC101, SULT1A2, SULT1A1, BX647358, ATXN2L, TUF    | 1.398928118 | 1 | 0.03 | 0.02 |
| 16p#188667 | 188678 | 16 | 28811374-28870759   | 59386   | ATP2A1, RABEP2, BX647358, CD19, NFATC2IP           | 1.398928118 | 1 | 0.03 | 0.02 |
| 16p#188627 | 188644 | 16 | 28310845-28498829   | 187985  | C440348, BC111068, CLN3, AK090709, IL27, P8, CCDC  | 1.398928118 | 1 | 0.03 | 0.02 |
| 16p#188702 | 188704 | 16 | 29168352-29225815   | 57464   | AK027150, AK023827                                 | Inf         | 1 | 0.02 | 0.00 |
| 5q#70720   | 70731  | 5  | 51079805-51462642   | 382838  |                                                    | 0           | 1 | 0.00 | 0.00 |
| 19q#210515 | 210522 | 19 | 48008819-48187471   | 178653  | S59494, PSG1, PSG7, CR599789                       | Inf         | 1 | 0.02 | 0.00 |
| 19q#210528 | 210529 | 19 | 48337389-48340424   | 3036    | M38046                                             | Inf         | 1 | 0.02 | 0.00 |
| 19q#210523 | 210527 | 19 | 48205963-48276317   | 70355   | PSG11, CR599789, PSG2                              | Inf         | 1 | 0.02 | 0.00 |
| 16q#190226 | 190250 | 16 | 58488308-58935607   | 447300  | CR936694                                           | 0           | 1 | 0.00 | 0.00 |
| 16q#190269 | 190271 | 16 | 59500334-59617350   | 117017  |                                                    | 0           | 1 | 0.00 | 0.00 |
| 16q#190251 | 190253 | 16 | 58954522-59001677   | 47156   |                                                    | 0           | 1 | 0.00 | 0.00 |
| 16q#191137 | 191224 | 16 | 69938962-70647137   | 708176  | RVELD3, PHLPL, BX647823, AP1G1, BX537575, LOC      | 0           | 1 | 0.00 | 0.00 |
| 16q#190254 | 190268 | 16 | 59034322-59437155   | 402834  |                                                    | 0           | 1 | 0.00 | 0.00 |
| 16q#191699 | 191705 | 16 | 76571264-76621921   | 50658   | KIAA1576, BC050287, CLEC3A                         | 0           | 1 | 0.00 | 0.00 |
| 16q#190993 | 190996 | 16 | 68534289-68610552   | 76264   | AJ001982                                           | 0           | 1 | 0.00 | 0.00 |
| 16q#190991 | 190992 | 16 | 68528794-68532047   | 3254    | WWP2                                               | 0           | 1 | 0.00 | 0.00 |
| 6q#88765   | 88768  | 6  | 101760344-101870818 | 110475  |                                                    | 0           | 1 | 0.00 | 0.00 |
| 6q#88782   | 88840  | 6  | 102041299-102556651 | 515353  | GRIK2                                              | 0           | 1 | 0.00 | 0.00 |
| 16q#190998 | 190999 | 16 | 68648091-68667065   | 18975   | AJ001982                                           | 0           | 1 | 0.00 | 0.00 |
| 6q#88841   | 88859  | 6  | 102564443-102960357 | 395915  | GRIK2                                              | 0           | 1 | 0.00 | 0.00 |
| 6q#88561   | 88568  | 6  | 98420589-98610904   | 190316  |                                                    | 0           | 1 | 0.00 | 0.00 |
| 6q#88328   | 88363  | 6  | 94108058-94880515   | 772458  | EPAH7, AY314747                                    | 0           | 1 | 0.00 | 0.00 |
| 6q#88559   | 88560  | 6  | 98375834-98397227   | 21394   |                                                    | 0           | 1 | 0.00 | 0.00 |
| 6q#88569   | 88606  | 6  | 98627347-99437270   | 809924  | POU3F2, FBXL4                                      | 0           | 1 | 0.00 | 0.00 |
| 6q#88673   | 88674  | 6  | 100177871-100184521 | 6651    |                                                    | 0           | 1 | 0.00 | 0.00 |
| 6q#88376   | 88388  | 6  | 95311959-95641411   | 329453  |                                                    | 0           | 1 | 0.00 | 0.00 |
| 9q#125135  | 125193 | 9  | 111282445-111773195 | 490751  | AK091948, C9orf29, BC040897, bA16L21.2.1, LOC5528  | 0           | 1 | 0.00 | 0.00 |
| 9q#125205  | 125390 | 9  | 111936601-113439585 | 1502985 | FP37, SLC31A2, AB014574, SLC31A1, AK074629, CDC    | 0           | 1 | 0.00 | 0.00 |
| 9q#126063  | 126076 | 9  | 121797833-121941678 | 143846  | AK125178, TLL11                                    | 0           | 1 | 0.00 | 0.00 |
| 9q#126220  | 126226 | 9  | 122960331-123011890 | 51560   | AK130011, STRBP                                    | 0           | 1 | 0.00 | 0.00 |
| 6q#87666   | 87739  | 6  | 84035563-84793211   | 757649  | ME1, PRSS35, SNAP91, C6orf159, CYB5R4              | 0           | 1 | 0.00 | 0.00 |
| 6q#88607   | 88672  | 6  | 99444505-100170171  | 725667  | 186, C6orf111, AK074628, AK123299, AL713747, BC005 | 0           | 1 | 0.00 | 0.00 |
| 9q#125888  | 125894 | 9  | 120109861-120230754 | 120894  | CDK5RAP2                                           | 0           | 1 | 0.00 | 0.00 |
| 9q#126214  | 126218 | 9  | 122924147-122952280 | 28134   | RABGAP1, AK130011, C9orf45                         | 0           | 1 | 0.00 | 0.00 |
| 18p#201413 | 201423 | 18 | 8769828-8957868     | 188041  | KIAA0802, AB018345                                 | 0           | 1 | 0.00 | 0.00 |
| 9q#125397  | 125400 | 9  | 113531047-113615982 | 84936   |                                                    | 0           | 1 | 0.00 | 0.00 |
| 9q#125523  | 125552 | 9  | 114743399-114983696 | 240298  | TNFSF8, TNC, BC034316, DEC1                        | 0           | 1 | 0.00 | 0.00 |
| 9p#121621  | 121642 | 9  | 38343993-38494913   | 150921  | ALDH1B1, IGF1BP1                                   | 0           | 1 | 0.00 | 0.00 |
| 6q#91271   | 91443  | 6  | 135280233-137091570 | 1811338 | 1L, MYB, AH1, BC040979, PDE7B, FAM54A, BCLAF1, A   | 0           | 1 | 0.00 | 0.00 |
| 6q#91733   | 91739  | 6  | 141468318-141642654 | 174337  |                                                    | 0           | 1 | 0.00 | 0.00 |
| 6q#91758   | 91759  | 6  | 142052939-142063797 | 10859   | AK097143                                           | 0           | 1 | 0.00 | 0.00 |
| 9q#125062  | 125134 | 9  | 110445968-111272255 | 826288  | MUSK, EDG2, AB002366, AK127247                     | 0           | 1 | 0.00 | 0.00 |
| 9q#125947  | 125966 | 9  | 120697464-120848741 | 151278  | PHF19, BX640713, TRAF1, C5                         | 0           | 1 | 0.00 | 0.00 |
| 18p#201904 | 201908 | 18 | 14537587-14602947   | 65361   |                                                    | 0           | 1 | 0.00 | 0.00 |
| 9q#125871  | 125887 | 9  | 119841634-120105553 | 263920  |                                                    | 0           | 1 | 0.00 | 0.00 |
| 18p#201424 | 201440 | 18 | 8989071-9142832     | 153762  | NDUFV2, ANKRD12                                    | 0           | 1 | 0.00 | 0.00 |
| 13q#162504 | 162522 | 13 | 24081194-24247053   | 165860  | ATP12A, RNF17                                      | 0           | 1 | 0.00 | 0.00 |
| 6q#91773   | 91777  | 6  | 142242116-142310504 | 68389   | AK097143                                           | 0           | 1 | 0.00 | 0.00 |
| 19p#208833 | 208837 | 19 | 2001965-20077289    | 59325   | CR593334                                           | 0           | 1 | 0.00 | 0.00 |
| 6q#91257   | 91270  | 6  | 134962194-135272501 | 310308  | AY944074                                           | 0           | 1 | 0.00 | 0.00 |
| 6q#91760   | 91767  | 6  | 142075401-142149243 | 73843   | AK097143                                           | 0           | 1 | 0.00 | 0.00 |
| 9q#125553  | 125558 | 9  | 114990577-115045975 | 55399   | DEC1                                               | 0           | 1 | 0.00 | 0.00 |

|                   |    |                     |         |                                                   |             |   |      |      |
|-------------------|----|---------------------|---------|---------------------------------------------------|-------------|---|------|------|
| 8p#109193_109195  | 8  | 21965962-21974105   | 8144    | BC052805, EPB49                                   | 0           | 1 | 0.00 | 0.00 |
| 8p#107679_107692  | 8  | 1862750-1980302     | 117553  | ARHGEF10, KB1BD11                                 | 0           | 1 | 0.00 | 0.00 |
| 19p#208841_208850 | 19 | 20153568-20288741   | 135174  | AF338193                                          | 0           | 1 | 0.00 | 0.00 |
| 18p#201909_201910 | 18 | 14723811-14730459   | 6649    |                                                   | 0           | 1 | 0.00 | 0.00 |
| 18q#204481_204488 | 18 | 50072218-50128824   | 56607   | POLI, STARD6                                      | 0           | 1 | 0.00 | 0.00 |
| 6q#87419_87420    | 6  | 80141390-80170505   | 29116   |                                                   | 0           | 1 | 0.00 | 0.00 |
| 6q#91768_91772    | 6  | 142160242-142223082 | 62841   | AK097143                                          | 0           | 1 | 0.00 | 0.00 |
| 6q#86824_86833    | 6  | 72035810-72080798   | 44989   | OGFRL1, BC110999                                  | 0           | 1 | 0.00 | 0.00 |
| 6q#86836_86854    | 6  | 72099961-72182714   | 82754   | BC110999, C6orf155                                | Inf         | 1 | 0.02 | 0.00 |
| 4q#59377_59406    | 4  | 79352729-79634077   | 281349  | FRAS1                                             | 0           | 1 | 0.00 | 0.00 |
| 19p#208838_208840 | 19 | 20094251-20120188   | 25938   | CR593334                                          | 0           | 1 | 0.00 | 0.00 |
| 19p#208891_208914 | 19 | 20906926-21266658   | 359733  | 5, ZNF430, AL832422, ZNF714, ZNF431, AX721153, ZN | 0           | 1 | 0.00 | 0.00 |
| 18p#201911_201918 | 18 | 14738584-14774279   | 35696   | ANKRD30B                                          | 0           | 1 | 0.00 | 0.00 |
| 4q#66799_66824    | 4  | 184393519-184644554 | 251036  | FLJ30277, AF338196, WWC2                          | 0           | 1 | 0.00 | 0.00 |
| 4q#66862_66876    | 4  | 184947440-185093086 | 145647  | RWDD4A, FLJ12716, AF338196                        | 0           | 1 | 0.00 | 0.00 |
| 4q#66894_66927    | 4  | 185313825-185714929 | 401105  | STOX2, ENPP6, AK056680, AK097110, IRF2            | 0           | 1 | 0.00 | 0.00 |
| 8p#109197_109198  | 8  | 21987419-21991270   | 3852    | EPB49                                             | 0           | 1 | 0.00 | 0.00 |
| 8p#109206_109222  | 8  | 22026248-22103756   | 77509   | HR, REEP4, LGI3, AK058094, SFTPC, BMP1            | 0           | 1 | 0.00 | 0.00 |
| 8p#109199_109205  | 8  | 21995824-22023360   | 27537   | EPB49, RAI16, NUDT18                              | 0           | 1 | 0.00 | 0.00 |
| 18q#204474_204480 | 18 | 50029588-50067805   | 38218   | POLI                                              | 0           | 1 | 0.00 | 0.00 |
| 18q#204489_204544 | 18 | 50134850-51046182   | 911333  | D6, C18orf54, C18orf26, RAB27B, CCDC68, AK093940, | 0           | 1 | 0.00 | 0.00 |
| 4q#66797_66798    | 4  | 184377110-184383931 | 6822    | AF338196                                          | 0           | 1 | 0.00 | 0.00 |
| 4q#66825_66861    | 4  | 184657990-184942741 | 284752  | AF338196, CARF, ING2, RWDD4A                      | 0           | 1 | 0.00 | 0.00 |
| 4q#58823_58847    | 4  | 73440538-73681404   | 240867  | ADAMTS3                                           | Inf         | 1 | 0.02 | 0.00 |
| 4q#58848_58865    | 4  | 73689048-73860717   | 171670  | ADAMTS3                                           | 0.692294348 | 1 | 0.02 | 0.02 |
| 19p#208854_208865 | 19 | 20366292-20555357   | 189066  | AF338193, FLJ44894                                | 0           | 1 | 0.00 | 0.00 |
| 4q#66928_66933    | 4  | 185728179-185793460 | 65282   | IRF2                                              | 0           | 1 | 0.00 | 0.00 |
| 4q#66959_66988    | 4  | 186064736-186433468 | 368733  | ACSL1, BC043280                                   | 0           | 1 | 0.00 | 0.00 |
| 19p#208915_208959 | 19 | 21284691-21782094   | 497404  | 08, AX721153, ZNF493, ZNF429, BC017035, ZNF100, Z | 0           | 1 | 0.00 | 0.00 |
| 10p#128467_128486 | 10 | 4834945-4979786     | 144842  | AKR1CL2, CR598545                                 | 0.692294348 | 1 | 0.02 | 0.02 |
| 10p#128782_128826 | 10 | 7848062-8255864     | 407803  | KIN, ATP5C1, BC073884, GATA3                      | Inf         | 1 | 0.02 | 0.00 |
| 10p#128910_128929 | 10 | 10461049-10927386   | 466338  | CR613571                                          | Inf         | 1 | 0.02 | 0.00 |
| 10p#129213_129216 | 10 | 13763111-13795603   | 32493   | FRMD4A                                            | Inf         | 1 | 0.02 | 0.00 |
| 10p#129249_129384 | 10 | 14078790-15307000   | 1228211 | HSPA14, SUV39H2, DCLRE1C, THEDC1, ACBD7, C10      | 0           | 1 | 0.00 | 0.00 |
| 18q#204451_204473 | 18 | 49594812-50015205   | 420394  | MBD2                                              | 0           | 1 | 0.00 | 0.00 |
| 4q#67121_67130    | 4  | 187592421-187687796 | 95376   | BC034307                                          | 0           | 1 | 0.00 | 0.00 |
| 15q#178192_178198 | 15 | 22986324-23042505   | 56182   | AF400495, AF400497, AF400499, AF400501            | 0           | 1 | 0.00 | 0.00 |
| 4q#57675_57714    | 4  | 54756132-55278279   | 522148  | CHIC2, AY229892, GSH2, PDGFRA                     | 0           | 1 | 0.00 | 0.00 |
| 10q#139113_139117 | 10 | 134995671-135014426 | 18756   | TUBGCP2, ZNF511                                   | 0           | 1 | 0.00 | 0.00 |
| 18q#202314_202327 | 18 | 20982229-21096937   | 114709  | ZNF521                                            | 0           | 1 | 0.00 | 0.00 |
| 18q#202343_202351 | 18 | 21393724-21634270   | 240547  |                                                   | 0           | 1 | 0.00 | 0.00 |
| 18q#204440_204450 | 18 | 49338411-49539444   | 201034  |                                                   | 0           | 1 | 0.00 | 0.00 |
| 4q#66989_67058    | 4  | 186443369-187001537 | 558169  | 1993, SNX25, LRP2BP, AK126913, ANKRD37, C4orf20,  | 0           | 1 | 0.00 | 0.00 |
| 19p#208965_208985 | 19 | 21880430-22156611   | 276182  | AB062076, ZNF208, ZNF257, ZNF676                  | 0           | 1 | 0.00 | 0.00 |
| 4q#66777_66796    | 4  | 184152902-184369104 | 216203  | DCTD, AF338196                                    | 0           | 1 | 0.00 | 0.00 |
| 21q#218923_218933 | 21 | 28160073-28343056   | 182984  | AL109791, C21orf94, AK093119                      | 0           | 1 | 0.00 | 0.00 |
| 10p#128487_128545 | 10 | 4987919-5492386     | 504468  | 1C2, DQ269985, AKR1C3, AKR1CL1, AKR1C4, UCN3,     | 0.692294348 | 1 | 0.02 | 0.02 |
| 10p#128574_128643 | 10 | 5779731-6353156     | 573426  | C067892, ANKRD16, FBXO18, IL15RA, IL2RA, RBM17,   | Inf         | 1 | 0.02 | 0.00 |
| 10p#128827_128881 | 10 | 8297868-9727231     | 1429364 | BC031880, AK127590                                | Inf         | 1 | 0.02 | 0.00 |
| 10p#128888_128909 | 10 | 9942546-10436255    | 493710  |                                                   | Inf         | 1 | 0.02 | 0.00 |
| 10p#130881_130886 | 10 | 33447752-33522583   | 74832   | NRP1                                              | 0           | 1 | 0.00 | 0.00 |
| 10p#130891_130897 | 10 | 33561916-33612412   | 50497   | NRP1                                              | 0           | 1 | 0.00 | 0.00 |
| 4q#66751_66776    | 4  | 183878986-184131639 | 252654  | AF195420, AB040888                                | 0           | 1 | 0.00 | 0.00 |
| 4q#67099_67119    | 4  | 187396443-187576350 | 179908  | AK057166, DKFZP564J102, CYP4V2, KLKB1, F11        | 0           | 1 | 0.00 | 0.00 |
| 1p#118_123        | 1  | 1875511-1899361     | 23851   | TMEM52, LOC339457                                 | 0           | 1 | 0.00 | 0.00 |



|                   |    |                     |         |                                                    |     |   |      |      |
|-------------------|----|---------------------|---------|----------------------------------------------------|-----|---|------|------|
| 12p#153576_153637 | 12 | 31483451-32175879   | 692429  | MGC24039, MGC50559, LOC196394, C12orf35, BICD1     | 0   | 1 | 0.00 | 0.00 |
| 12p#153669_153707 | 12 | 32527382-32846633   | 319252  | FGD4, DNM1L, YARS2, PKP2                           | 0   | 1 | 0.00 | 0.00 |
| 4q#67222_67279    | 4  | 188640621-189329766 | 689146  | BC042049, AL157490, ZFP42                          | 0   | 1 | 0.00 | 0.00 |
| 21q#218054_218074 | 21 | 16003969-16146447   | 142479  | USP25                                              | 0   | 1 | 0.00 | 0.00 |
| 4q#67159_67217    | 4  | 187942901-188567087 | 624187  | FAT                                                | 0   | 1 | 0.00 | 0.00 |
| 15q#178151_178191 | 15 | 22620019-22976460   | 356442  | F319522, AF319524, AF400485, AL832758, AF400489,   | 0   | 1 | 0.00 | 0.00 |
| 15q#178199_178259 | 15 | 23050213-23647774   | 597562  | AF400501, UBE3A, BC041438, ATP10A                  | 0   | 1 | 0.00 | 0.00 |
| 10q#139118_139124 | 10 | 135017774-135054623 | 36850   | DRD1IP, PRAP1                                      | 0   | 1 | 0.00 | 0.00 |
| 18q#202303_202313 | 18 | 20886912-20975515   | 88604   | ZNF521                                             | 0   | 1 | 0.00 | 0.00 |
| 4q#66030_66032    | 4  | 171612228-171685909 | 73682   |                                                    | 0   | 1 | 0.00 | 0.00 |
| 6p#80781_80787    | 6  | 97634-174874        | 77241   | AK097546                                           | 0   | 1 | 0.00 | 0.00 |
| 4q#67059_67064    | 4  | 187008261-187047404 | 39144   | SORBS2                                             | 0   | 1 | 0.00 | 0.00 |
| 19p#208986_208995 | 19 | 22188574-22303125   | 114552  | ZNF676                                             | 0   | 1 | 0.00 | 0.00 |
| 12p#153638_153668 | 12 | 32181760-32489343   | 307584  | BICD1                                              | 0   | 1 | 0.00 | 0.00 |
| 4q#67154_67158    | 4  | 187899683-187933172 | 33490   | FAT                                                | 0   | 1 | 0.00 | 0.00 |
| 4q#67218_67221    | 4  | 188591332-188630334 | 39003   | BC042049                                           | 0   | 1 | 0.00 | 0.00 |
| 18q#202064_202093 | 18 | 18248643-18819005   | 570363  | CTAGE1, RBBP8                                      | 0   | 1 | 0.00 | 0.00 |
| 6p#84265_84386    | 6  | 36666488-37617414   | 950927  | BX538108, AK124589, PI16, MTCH1, FGD2, PIM1, C6orf | 0   | 1 | 0.00 | 0.00 |
| 10p#128547_128573 | 10 | 5509528-5767816     | 258289  | CALML5, AK128534, M36707, ASB13, CR936780          | Inf | 1 | 0.02 | 0.00 |
| 19q#209454_209460 | 19 | 38476226-38487294   | 11069   | CEBPA, CR602936                                    | 0   | 1 | 0.00 | 0.00 |
| 10q#139087_139112 | 10 | 134853791-134990207 | 136417  | KNDC1, UTF1, VENTX, ADAM8, TUBGCP2                 | 0   | 1 | 0.00 | 0.00 |
| 22q#222850_222885 | 22 | 29237643-29420495   | 182853  | AK127185, TCN2, SLC35E4, CR614052, BC093099, D     | 0   | 1 | 0.00 | 0.00 |
| 22q#222845_222849 | 22 | 29207337-29231336   | 24000   | SEC14L4                                            | 0   | 1 | 0.00 | 0.00 |
| 22q#222886_222905 | 22 | 29426882-29577287   | 150406  | OSBP2                                              | 0   | 1 | 0.00 | 0.00 |
| 22q#222907_222927 | 22 | 29594981-29783507   | 188527  | OSBP2, FLJ35801, MORC2, AK056480                   | Inf | 1 | 0.02 | 0.00 |
| 22q#222928_223036 | 22 | 29802958-30526681   | 723724  | IGC17330, ZNF278, BC004550, DRG1, AF078103, EIF4   | 0   | 1 | 0.00 | 0.00 |
| 4q#64985_65005    | 4  | 156873903-157074198 | 200296  | GUCY1A3, AK124244, GUCY1B3                         | 0   | 1 | 0.00 | 0.00 |
| 4q#66014_66029    | 4  | 171333076-171567367 | 234292  | AADAT                                              | 0   | 1 | 0.00 | 0.00 |
| 4q#67065_67066    | 4  | 187058131-187071629 | 13499   | SORBS2                                             | 0   | 1 | 0.00 | 0.00 |
| 12q#154923_154929 | 12 | 49521912-49582214   | 60303   | TMPPRSS12                                          | 0   | 1 | 0.00 | 0.00 |
| 4q#66651_66661    | 4  | 181911919-182173672 | 261754  |                                                    | 0   | 1 | 0.00 | 0.00 |
| 4q#67087_67098    | 4  | 187271985-187390378 | 118394  | TLR3                                               | 0   | 1 | 0.00 | 0.00 |
| 19p#207646_207671 | 19 | 10246601-10432687   | 186087  | ICAM5, MGC19604, RAVR1, ICAM3, TYK2, CDC37, A      | 0   | 1 | 0.00 | 0.00 |
| 1p#3773_3933      | 1  | 39680263-40995854   | 1315592 | CAP1, PPT1, RLF, TMCO2, ZMPSTE24, COL9A2, SMA      | 0   | 1 | 0.00 | 0.00 |
| 1p#3955_3988      | 1  | 41191176-41653286   | 462111  | SCMH1, EDN2, HIVER3                                | 0   | 1 | 0.00 | 0.00 |
| 1p#4484_4495      | 1  | 46159865-46277007   | 117143  | MAST2, PIK3R3                                      | 0   | 1 | 0.00 | 0.00 |
| 21q#218039_218053 | 21 | 15585277-15981923   | 396647  |                                                    | 0   | 1 | 0.00 | 0.00 |
| 4p#54154_54157    | 4  | 1777262-1794318     | 17057   | FGFR3, LETM1                                       | 0   | 1 | 0.00 | 0.00 |
| 22q#224831_224832 | 22 | 44813553-44819593   | 6041    | FLJ27365                                           | 0   | 1 | 0.00 | 0.00 |
| 19q#209427_209453 | 19 | 38203834-38463368   | 259535  | RHPN2, GPATC1, LOC126248, LRP3, SLC7A10            | 0   | 1 | 0.00 | 0.00 |
| 19q#209461_209463 | 19 | 38495119-38514063   | 18945   |                                                    | 0   | 1 | 0.00 | 0.00 |
| 4q#58339_58342    | 4  | 66816761-66883815   | 67055   |                                                    | 0   | 1 | 0.00 | 0.00 |
| 6p#84387_84407    | 6  | 37628798-37924901   | 296104  | AK126965, MDGA1, CR604758, TEX27                   | 0   | 1 | 0.00 | 0.00 |
| 4q#64221_64348    | 4  | 147548060-149110769 | 1562710 | YD-SP14, EDNRA, CR624983, TMEM34, BC046128, LO     | 0   | 1 | 0.00 | 0.00 |
| 4q#64390_64427    | 4  | 149478456-150026786 | 548331  | NR3C2                                              | 0   | 1 | 0.00 | 0.00 |
| 4q#65033_65200    | 4  | 157427598-159912213 | 2484616 | GLRB, GRIA2, C4orf18, AK096792, TMEM144, AK12264   | 0   | 1 | 0.00 | 0.00 |
| 4q#65261_65290    | 4  | 160571960-161250353 | 678394  | AB002311                                           | 0   | 1 | 0.00 | 0.00 |
| 4q#65648_65682    | 4  | 166540017-166902364 | 362348  | KLHL2, SC4MOL, CPE                                 | 0   | 1 | 0.00 | 0.00 |
| 4q#65692_65712    | 4  | 167122168-167309686 | 187519  | TLL1                                               | 0   | 1 | 0.00 | 0.00 |
| 4q#65812_65818    | 4  | 168765562-169025236 | 259675  |                                                    | 0   | 1 | 0.00 | 0.00 |
| 21q#219835_219866 | 21 | 36093751-36386484   | 292734  | AK123035, SETD4                                    | 0   | 1 | 0.00 | 0.00 |
| 4q#65006_65028    | 4  | 157083843-157264601 | 180759  | GUCY1B3, ACCN5, TDO2, CTSO                         | 0   | 1 | 0.00 | 0.00 |
| 4q#67067_67086    | 4  | 187078184-187258846 | 180663  | SORBS2                                             | 0   | 1 | 0.00 | 0.00 |
| 6p#80789_80791    | 6  | 211079-238493       | 27415   | DUSP22                                             | 0   | 1 | 0.00 | 0.00 |
| 19p#208178_208189 | 19 | 14591047-14703896   | 112850  | EMR3, ZNF333, BC048107                             | 0   | 1 | 0.00 | 0.00 |

|                   |    |                     |         |                                                    |  |             |   |      |      |
|-------------------|----|---------------------|---------|----------------------------------------------------|--|-------------|---|------|------|
| 4p#54147_54152    | 4  | 172492-1767656      | 43365   | FGFR3                                              |  | 0           | 1 | 0.00 | 0.00 |
| 22q#224829_224830 | 22 | 44807694-44811071   | 3378    | FLJ27365                                           |  | 0           | 1 | 0.00 | 0.00 |
| 22q#225342_225344 | 22 | 49237352-49244850   | 7499    | hCAP-H2                                            |  | 0           | 1 | 0.00 | 0.00 |
| 1p#4153_4243      | 1  | 43300767-44021734   | 720968  | C1orf210, TIE1, MPL, CDC20, ELOVL1, MED8, C1orf84, |  | 0           | 1 | 0.00 | 0.00 |
| 1p#4266_4356      | 1  | 44158597-4492816    | 834220  | C1orf164, TMEM53, MGC33556, KIF2C, RPS8, VMD2L2,   |  | 0           | 1 | 0.00 | 0.00 |
| 1p#4386_4467      | 1  | 45247348-4592684    | 745337  | K054714, MMACHC, PRDX1, AKR1A1, NASP, BC11098,     |  | 0           | 1 | 0.00 | 0.00 |
| 2q#33566_33575    | 2  | 191611367-191695383 | 84017   | GLS, STAT1                                         |  | 0           | 1 | 0.00 | 0.00 |
| 4p#54144_54146    | 4  | 1709821-1718883     | 9063    | TACC3                                              |  | 0           | 1 | 0.00 | 0.00 |
| 4q#64211_64220    | 4  | 147438099-147534774 | 96676   | LSM6, BC019894, C4orf13                            |  | 0           | 1 | 0.00 | 0.00 |
| 4q#65029_65032    | 4  | 157302998-157389657 | 86660   |                                                    |  | 0           | 1 | 0.00 | 0.00 |
| 4q#65201_65260    | 4  | 159923872-160555558 | 631687  | , LOC201725, ETFDH, PPIID, AB040883, FLJ25371, ABC |  | 0           | 1 | 0.00 | 0.00 |
| 4q#65291_65304    | 4  | 161293214-161635981 | 342768  |                                                    |  | 0           | 1 | 0.00 | 0.00 |
| 4q#65713_65721    | 4  | 167318114-167391006 | 72893   | TLL1                                               |  | 0           | 1 | 0.00 | 0.00 |
| 6p#80793_80799    | 6  | 262620-320949       | 58330   | DUSP22                                             |  | 0           | 1 | 0.00 | 0.00 |
| 12q#154914_154922 | 12 | 49463530-49511363   | 47834   | ATF1                                               |  | 0           | 1 | 0.00 | 0.00 |
| 19p#208190_208196 | 19 | 14723551-14777815   | 54265   | EMR2                                               |  | 0           | 1 | 0.00 | 0.00 |
| 21q#219955_220054 | 21 | 37119939-37931211   | 811273  | S, DSCR6, PIGR, TTC3, DSCR9, DSCR3, DYRK1A, KC     |  | 0           | 1 | 0.00 | 0.00 |
| 21q#220162_220204 | 21 | 38827654-39133530   | 305877  | ERG, AY204747, C21orf24, AY204746, ETS2            |  | 0           | 1 | 0.00 | 0.00 |
| 21q#220473_220478 | 21 | 41270119-41403999   | 133881  |                                                    |  | 0           | 1 | 0.00 | 0.00 |
| 21q#220479_220514 | 21 | 41414667-41680949   | 266283  | AK094492, BACE2, BC036314, FAM3B, MX2              |  | 0           | 1 | 0.00 | 0.00 |
| 21q#220515_220535 | 21 | 41686534-41935451   | 248918  | MX2, AK096355, MX1, TMPRSS2                        |  | 0           | 1 | 0.00 | 0.00 |
| 22q#225345_225376 | 22 | 49248331-49406305   | 157975  | F1, KLHDC7B<b>, CR593162, CHKB, CR456603, MAPK     |  | 0           | 1 | 0.00 | 0.00 |
| 16p#188916_188960 | 16 | 30933505-31168379   | 234875  | 646, LOC339105, VKORC1, BCKDK, MYST1, PRSS8, P     |  | Inf         | 1 | 0.02 | 0.00 |
| 16p#188829_188859 | 16 | 30417973-30593148   | 175176  | C13138, ZNF688, BC073814, FLJ32130, AL834299, ZN   |  | 0.692294348 | 1 | 0.02 | 0.02 |
| 16p#188871_188879 | 16 | 30674155-30727796   | 53642   | PHKG2, LOC90835, RNF40, AB002324                   |  | Inf         | 1 | 0.02 | 0.00 |
| 16p#188711_188712 | 16 | 29560500-29572089   | 11590   | BOLA2                                              |  | Inf         | 1 | 0.02 | 0.00 |
| 16p#188796_188828 | 16 | 30255342-30411043   | 155702  | TBC1D10B, MYLPF, SEPT1, ZNF553, LOC51333, XTP3     |  | 0.692294348 | 1 | 0.02 | 0.02 |
| 16p#186381_186437 | 16 | 2326759-2786417     | 459659  | BX648283, ATP6V0C, AMDHD2, PDPK1, AK096394, LC     |  | 1.398928118 | 1 | 0.03 | 0.02 |
| 17q#196250_196257 | 17 | 34217158-34251508   | 34351   | CCDC49                                             |  | 1.044194198 | 1 | 0.05 | 0.05 |
| 1q#16683_16713    | 1  | 213062779-213319921 | 257143  | ESRRG                                              |  | 0.692294348 | 1 | 0.02 | 0.02 |
| 1q#16807_16824    | 1  | 214550344-214908330 | 357987  | BC039113, CGI-115, TGFB2                           |  | 1.398928118 | 1 | 0.03 | 0.02 |
| 1q#10588_10589    | 1  | 146534262-146549202 | 14941   | X14355                                             |  | Inf         | 1 | 0.02 | 0.00 |
| 14q#177117_177118 | 14 | 99870925-99874287   | 3363    | WARS                                               |  | 0           | 1 | 0.00 | 0.00 |
| 17p#195036_195041 | 17 | 21765903-21835647   | 69745   | BC039120                                           |  | 0           | 1 | 0.00 | 0.00 |
| 7p#98011_98052    | 7  | 43790394-44050147   | 259754  | M2, AB209486, POLM, AEBP1, POLD2, MYL7, GCK, YK    |  | 0           | 1 | 0.00 | 0.00 |
| 7p#98127_98156    | 7  | 44648299-44862193   | 213895  | H2AFV, PURB, AK097526, MYO1G, CCM2                 |  | 0           | 1 | 0.00 | 0.00 |
| 12q#156003_156034 | 12 | 58019068-58467694   | 448627  | BC007463, SLC16A7                                  |  | 0           | 1 | 0.00 | 0.00 |
| 14q#170106_170109 | 14 | 22022060-22052858   | 30799   | BC063432                                           |  | 0           | 1 | 0.00 | 0.00 |
| 12q#155917_155929 | 12 | 56460713-56528808   | 68096   | DKFZP586D0919, TSFM, AVIL, CTDSP2                  |  | 0           | 1 | 0.00 | 0.00 |
| 14q#170103_170105 | 14 | 22000194-22012322   | 12129   | BC063432                                           |  | 0           | 1 | 0.00 | 0.00 |
| 7p#98053_98126    | 7  | 44057519-44641051   | 583533  | D3, NPC1L1, DDX56, BC035467, TMED4, OGDH, DKFZ     |  | 0           | 1 | 0.00 | 0.00 |
| 19q#211967_211981 | 19 | 59626135-59727786   | 101652  | TTYH1, AF315098, LENG8, CDC42EP5, LAIR2            |  | 0           | 1 | 0.00 | 0.00 |
| 19q#211989_212030 | 19 | 59780403-60228272   | 447870  | RA1, LILRB1, LILRB4, KIR3DL3, KIR2DS4, FCAR, NCR   |  | 0           | 1 | 0.00 | 0.00 |
| 19q#212053_212065 | 19 | 60374771-60467114   | 92344   | X54150, SYT5, PTPRH, TMEM86B, SAPS1, HSPBP1        |  | 0           | 1 | 0.00 | 0.00 |
| 3p#39416_39462    | 3  | 15584981-16052725   | 467745  | HACL1, BTD, ANKRD28, AK094780                      |  | 0           | 1 | 0.00 | 0.00 |
| 3p#39463_39701    | 3  | 16071028-18918645   | 2847618 | OXNAD1, DQ364598, RAFTLIN, DAZL, AB029015, PLCL    |  | 0           | 1 | 0.00 | 0.00 |
| 3q#49739_49749    | 3  | 146407964-146771877 | 363914  |                                                    |  | 0           | 1 | 0.00 | 0.00 |
| 3q#49750_49913    | 3  | 146842203-149559606 | 2717404 | 10, PLOD2, PLSCR4, PLSCR2, PLSCR1, ZIC4, ZIC1, S   |  | 0           | 1 | 0.00 | 0.00 |
| 3q#49914_49942    | 3  | 149575818-149951626 | 375809  | AGTR1                                              |  | 0           | 1 | 0.00 | 0.00 |
| 3q#49943_50286    | 3  | 149958592-153699779 | 3741188 | 078, RNF13, PFN2, TSC22D2, AF201290, SERP1, EIF2   |  | 0           | 1 | 0.00 | 0.00 |
| 3q#50287_50400    | 3  | 153719649-155948207 | 2228559 | AP2B, AK092619, AF086445, BC038431, SGEF, DHX36    |  | 0           | 1 | 0.00 | 0.00 |
| 3q#50401_50730    | 3  | 155984429-159788044 | 3803616 | MPS, KCNAB1, SSR3, TIPARP, AK056401, FLJ16641, B   |  | 0           | 1 | 0.00 | 0.00 |
| 3q#50815_50864    | 3  | 160790324-161260608 | 470285  | SCHIP1, AK097161, IL12A                            |  | 0           | 1 | 0.00 | 0.00 |
| 3q#50865_50902    | 3  | 161274280-161609035 | 334756  | AK097161, BC033011, IF180, SMC4L1                  |  | 0           | 1 | 0.00 | 0.00 |
| 3q#50915_51018    | 3  | 161668900-162721820 | 1052921 | PPM1L, AK055115, BC035116, B3GALNT1, NMD3, AK      |  | 0           | 1 | 0.00 | 0.00 |

|                   |    |                     |         |                                                   |             |   |      |      |
|-------------------|----|---------------------|---------|---------------------------------------------------|-------------|---|------|------|
| 3q#51019_51059    | 3  | 162734085-163987524 | 1253440 | BC019327                                          | 0           | 1 | 0.00 | 0.00 |
| 3q#51079_51150    | 3  | 164270795-166192902 | 1922108 | BC019327, BC027488, SI                            | 0           | 1 | 0.00 | 0.00 |
| 3q#51161_51299    | 3  | 166286784-168658642 | 2371859 | SLITRK3, AK096400, BCHE, FLJ23049, SERPINI2       | 0           | 1 | 0.00 | 0.00 |
| 7p#96033_96040    | 7  | 22180265-22270519   | 90255   | BC066301                                          | 0.692294348 | 1 | 0.02 | 0.02 |
| 12q#155558_155577 | 12 | 54162284-54329300   | 167017  | OR6C68                                            | 0           | 1 | 0.00 | 0.00 |
| 12q#155915_155916 | 12 | 56453403-56455263   | 1861    | DKFZP586D0919                                     | 0           | 1 | 0.00 | 0.00 |
| 19q#212046_212052 | 19 | 60333945-60366959   | 33015   | X54150, TNNT1, TNNT3, LOC352909                   | 0           | 1 | 0.00 | 0.00 |
| 1q#14337_14348    | 1  | 182854702-183007442 | 152741  | HMCN1, PRG4                                       | 1.398928118 | 1 | 0.03 | 0.02 |
| 1q#14783_14785    | 1  | 191641567-191699535 | 57969   |                                                   | 1.398928118 | 1 | 0.03 | 0.02 |
| 1q#10402_10404    | 1  | 142914439-142929350 | 14912   | AF379624, TXNIP                                   | Inf         | 1 | 0.02 | 0.00 |
| 1q#10854_10860    | 1  | 148513095-148554130 | 41036   | AK093351, MRPL9, BC073949, OAZ3                   | Inf         | 1 | 0.02 | 0.00 |
| 1q#10903_10919    | 1  | 148857604-148984638 | 127035  | TCHHL1, CR602107, AY827491, AY396742, CR933683    | Inf         | 1 | 0.02 | 0.00 |
| 1q#10926_10933    | 1  | 149040203-149129672 | 89470   | BC014333, FLG, AK056431                           | Inf         | 1 | 0.02 | 0.00 |
| 1q#10949_10957    | 1  | 149288712-149344413 | 55702   | LCE5A, C1orf42                                    | Inf         | 1 | 0.02 | 0.00 |
| 1q#14812_14847    | 1  | 192645771-193180060 | 534290  | KCNT2                                             | 1.398928118 | 1 | 0.03 | 0.02 |
| 1q#15392_15393    | 1  | 199294243-199305055 | 10813   | AF093822, SYT2                                    | 0.686886232 | 1 | 0.03 | 0.05 |
| 17q#195999_196035 | 17 | 31123416-31353056   | 229641  | C17orf66, CCL5, CR592540, AK125932, RDM1, LYZL6   | 0           | 1 | 0.00 | 0.00 |
| 14q#177104_177116 | 14 | 99814682-99864560   | 49879   | AF147416, SLC25A29, C14orf68                      | 0           | 1 | 0.00 | 0.00 |
| 14q#177094_177103 | 14 | 99720067-99805004   | 84938   | YY1                                               | 0           | 1 | 0.00 | 0.00 |
| 14q#177617_177633 | 14 | 103893086-104034667 | 141582  |                                                   | 0           | 1 | 0.00 | 0.00 |
| 14q#177755_177776 | 14 | 104779683-104954063 | 174381  | BRF1, PACS2, S55096                               | 0           | 1 | 0.00 | 0.00 |
| 14q#177777_177779 | 14 | 104961146-104976067 | 14922   | MTA1                                              | 0           | 1 | 0.00 | 0.00 |
| 11q#146246_146252 | 11 | 80149700-80360082   | 210383  | AY726583                                          | 0.692294348 | 1 | 0.02 | 0.02 |
| 5q#79842_79875    | 5  | 170663330-171175968 | 512639  | TLX3, NPM1, FGF18                                 | 0           | 1 | 0.00 | 0.00 |
| 5q#79941_79968    | 5  | 171784069-172145760 | 361692  | SH3PXD2B, AK130731, AK128025, DUSP1               | 0           | 1 | 0.00 | 0.00 |
| 5q#79977_79989    | 5  | 172233510-172312183 | 78674   | ERGIC1                                            | 0           | 1 | 0.00 | 0.00 |
| 14q#177794_177795 | 14 | 105050675-105058872 | 8198    | S55096                                            | 0           | 1 | 0.00 | 0.00 |
| 5q#79969_79976    | 5  | 172157190-172219720 | 62531   | ERGIC1                                            | 0           | 1 | 0.00 | 0.00 |
| 5q#80000_80021    | 5  | 172413584-172608616 | 195033  | LOC153222, BNIP1, AK172771, NKX2-5                | 0           | 1 | 0.00 | 0.00 |
| 14q#177781_177784 | 14 | 104990677-105013921 | 23245   | MTA1, S55096, CRIP2                               | 0           | 1 | 0.00 | 0.00 |
| 3q#46152_46185    | 3  | 103150077-103540908 | 390832  | AK090588, BC031261                                | 0           | 1 | 0.00 | 0.00 |
| 19q#212033_212037 | 19 | 60251694-60280109   | 28416   | RDH13, EPS8L1                                     | 0           | 1 | 0.00 | 0.00 |
| 19q#212066_212074 | 19 | 60476542-60539910   | 63369   | HSPBP1, X54150, BRSK1, BC020862                   | 0           | 1 | 0.00 | 0.00 |
| 19q#212082_212083 | 19 | 60580158-60588520   | 8363    | MDAC1, AK096870                                   | 0           | 1 | 0.00 | 0.00 |
| 19q#212039_212044 | 19 | 60290228-60318408   | 28181   | EPS8L1, PPP1R12C                                  | 0           | 1 | 0.00 | 0.00 |
| 3q#50903_50914    | 3  | 161612457-161656406 | 43950   | SMC4L1, TRIM59                                    | 0           | 1 | 0.00 | 0.00 |
| 3q#51151_51160    | 3  | 166199114-166275096 | 75983   | SI                                                | 0           | 1 | 0.00 | 0.00 |
| 3q#51300_51310    | 3  | 168672149-168760551 | 88403   | SERPINI2, WDR49                                   | 0           | 1 | 0.00 | 0.00 |
| 3q#51386_51394    | 3  | 169990215-170155571 | 165357  | BC011266, AK096400                                | 0           | 1 | 0.00 | 0.00 |
| 3q#51395_51562    | 3  | 170174578-171652429 | 1477852 | 34, CR606238, LRRRC31, SAMDT, AL833309, TLOC1, GA | 0           | 1 | 0.00 | 0.00 |
| 3q#51563_51579    | 3  | 171661124-171790384 | 129261  | AK094547, SLC7A14, BC039437                       | 0           | 1 | 0.00 | 0.00 |
| 3q#51580_51802    | 3  | 171803349-174156021 | 2352673 | B209907, AK026825, FNDC3B, AK091236, GHSR, TNFS   | 0           | 1 | 0.00 | 0.00 |
| 19q#212084_212091 | 19 | 60591734-60623818   | 32085   | RPL28, UBE2S                                      | 0           | 1 | 0.00 | 0.00 |
| 16p#186095_186098 | 16 | 511780-536260       | 24481   | RAB11FIP3, SOLH                                   | 0.692294348 | 1 | 0.02 | 0.02 |
| 20p#212508_212600 | 20 | 142618-843312       | 700695  | U02019, TRIB3, C20orf18, TBC1D20, CSNK2A1, TCF15  | 0           | 1 | 0.00 | 0.00 |
| 20p#212607_212678 | 20 | 904240-1506438      | 602199  | 24, SNPH, SDCBP2, BC034773, FKBP1A, NSFL1C, AK    | 0           | 1 | 0.00 | 0.00 |
| 20p#212687_212764 | 20 | 1597382-2448690     | 851309  | YN, STK35, BC017340, TGM3, TGM6, SNRPB, AK1267    | 0           | 1 | 0.00 | 0.00 |
| 20p#213053_213055 | 20 | 4773001-4796595     | 23595   | SLC23A2                                           | 0           | 1 | 0.00 | 0.00 |
| 20p#212601_212606 | 20 | 851229-897510       | 46282   | RSPO4                                             | 0           | 1 | 0.00 | 0.00 |
| 14q#170050_170051 | 14 | 21559744-21569735   | 9992    | BC063432                                          | 0           | 1 | 0.00 | 0.00 |
| 14q#170052_170062 | 14 | 21575909-21662759   | 86851   | BC063432                                          | 0           | 1 | 0.00 | 0.00 |
| 16q#191113_191115 | 16 | 69714842-69736498   | 21657   | HYDIN                                             | 0           | 1 | 0.00 | 0.00 |
| 14q#170063_170067 | 14 | 21667866-21698077   | 30212   | BC063432                                          | 0           | 1 | 0.00 | 0.00 |
| 16q#191111_191112 | 16 | 69696947-69708666   | 11720   | HYDIN                                             | 0           | 1 | 0.00 | 0.00 |
| 14q#170068_170095 | 14 | 21705879-21936635   | 230757  | BC063432                                          | 0           | 1 | 0.00 | 0.00 |

|                   |    |                     |         |                                                  |             |   |      |      |
|-------------------|----|---------------------|---------|--------------------------------------------------|-------------|---|------|------|
| 16q#191085_191086 | 16 | 69447152-69454259   | 7108    | BC043273                                         | 0           | 1 | 0.00 | 0.00 |
| 16q#191087_191110 | 16 | 69464949-69685273   | 220325  | AB058767, AL834340, HYDIN                        | 0           | 1 | 0.00 | 0.00 |
| 16p#188519_188536 | 16 | 27240165-27369366   | 129202  | IL4R, IL21R                                      | 1.398928118 | 1 | 0.03 | 0.02 |
| 20p#212836_212839 | 20 | 2975701-2997597     | 21897   | MRPS26                                           | 0           | 1 | 0.00 | 0.00 |
| 20p#212856_212862 | 20 | 3099593-3133472     | 33880   | BC038860, G36683, C20orf116                      | 0           | 1 | 0.00 | 0.00 |
| 20p#212841_212846 | 20 | 3007090-3037943     | 30854   | AVP, UBOX5                                       | 0           | 1 | 0.00 | 0.00 |
| 17q#200471_200475 | 17 | 77442683-77503744   | 61062   | THOC4, AF338198, NOTUM                           | 0           | 1 | 0.00 | 0.00 |
| 5p#67508_67509    | 5  | 873416-878341       | 4926    | ZDHC11                                           | Inf         | 1 | 0.02 | 0.00 |
| 11q#144854_144879 | 11 | 65994721-66130077   | 135357  | PP3, BBS1, CR616301, ZDHHC24, ACTN3, CTSE, CCD4  | 1.044194198 | 1 | 0.05 | 0.05 |
| 3q#53262_53406    | 3  | 191620232-193821611 | 2201380 | IL1RAP, AK095107, OSTN, UTS2D, AK090630, CCDC5   | 0           | 1 | 0.00 | 0.00 |
| 7q#106707_106715  | 7  | 150182084-150216921 | 34838   | 28129, ACCN3, AK124944, CDK5, SLC4A2, FASTK, C7C | 0           | 1 | 0.00 | 0.00 |
| 16p#189007_189016 | 16 | 31495560-31633184   | 137625  | AK054698, ZNF720                                 | Inf         | 1 | 0.02 | 0.00 |
| 16p#186155_186161 | 16 | 872155-937272       | 65118   | FLJ12681                                         | 1.398928118 | 1 | 0.03 | 0.02 |
| 16p#186176_186180 | 16 | 1060700-1078650     | 17951   | FLJ32252, C1QTNF8                                | 1.398928118 | 1 | 0.03 | 0.02 |
| 16p#186147_186151 | 16 | 803011-822181       | 19171   | LOC388199                                        | 1.398928118 | 1 | 0.03 | 0.02 |
| 16p#186152_186154 | 16 | 831335-857267       | 25933   | FLJ12681                                         | 1.398928118 | 1 | 0.03 | 0.02 |
| 16p#186181_186194 | 16 | 1081944-1183719     | 101776  | C1QTNF8, Y11918, CACNA1H                         | 1.398928118 | 1 | 0.03 | 0.02 |
| 16q#189623_189667 | 16 | 51834361-52217905   | 383545  | CHD9, BX537874, RBL2, FTS, KIAA1005              | 0           | 1 | 0.00 | 0.00 |
| 16q#189716_189718 | 16 | 52704833-52719803   | 14971   | AK096554, CR622027                               | 0           | 1 | 0.00 | 0.00 |
| 16q#189668_189715 | 16 | 52232461-52695029   | 462569  | KIAA1005, AK096554                               | 0           | 1 | 0.00 | 0.00 |
| 5q#72904_72986    | 5  | 79525024-80281200   | 756177  | C5, SPZ1, ZFYVE16, AL833087, UNQ9217, DP58, DHFR | 0           | 1 | 0.00 | 0.00 |
| 5q#72866_72902    | 5  | 79106885-79511037   | 404153  | CMYA5, MTX3, THBS4, SERINC5                      | 0           | 1 | 0.00 | 0.00 |
| 5q#72129_72133    | 5  | 70911043-70944957   | 33915   | AB033067, MCCC2                                  | 0           | 1 | 0.00 | 0.00 |
| 5q#71750_71828    | 5  | 64752428-65471368   | 718941  | SG14, PPWD1, TRIM23, FLJ13611, SGTB, NLN, AB033  | 0           | 1 | 0.00 | 0.00 |
| 5q#71739_71749    | 5  | 64665620-64745405   | 79786   | ADAMTS6                                          | 0           | 1 | 0.00 | 0.00 |
| 5q#72109_72128    | 5  | 70721505-70899206   | 177702  | AB033067, BDP1                                   | 0           | 1 | 0.00 | 0.00 |
| 15q#181273_181300 | 15 | 54498183-54761967   | 263785  | TEX9, MNS1, BC037892, SUHW4                      | 0           | 1 | 0.00 | 0.00 |
| 3p#42091_42119    | 3  | 48411179-48578094   | 166916  | VB1, AB007867, CCDC51, CCDC72, TREX1, SCOTIN, F  | 0           | 1 | 0.00 | 0.00 |
| 11p#143121_143126 | 11 | 47030491-47077012   | 46522   | C11orf49                                         | 0           | 1 | 0.00 | 0.00 |
| 4q#59476_59488    | 4  | 80337122-80513025   | 175904  | BC036848                                         | 0           | 1 | 0.00 | 0.00 |
| 15q#180770_180806 | 15 | 49104925-49440874   | 335950  | TNFAIP8L3, CYP19A1, AK172756                     | 0           | 1 | 0.00 | 0.00 |
| 3p#42085_42090    | 3  | 48337766-48399766   | 62001   | FBXW12                                           | 0           | 1 | 0.00 | 0.00 |
| 1p#9881_9934      | 1  | 114526221-114971596 | 445376  | M33, BC063894, BCAS2, DENND2C, AMPD1, NRAS, X0   | 0           | 1 | 0.00 | 0.00 |
| 3p#41767_41792    | 3  | 45390091-45620087   | 229997  | LARS2, LIMD1                                     | 0           | 1 | 0.00 | 0.00 |
| 3p#42054_42084    | 3  | 48096965-48330690   | 233726  | C017035, CDC25A, CAMP, ZNF589, BC028160, BC0626  | 0           | 1 | 0.00 | 0.00 |
| 3p#40975_41021    | 3  | 37283475-37698171   | 414697  | GOLGA4, AJ493605, C3orf35, ITGA9                 | 0           | 1 | 0.00 | 0.00 |
| 3p#40886_40974    | 3  | 36126871-37277302   | 1150432 | 1552, AB002340, EPM2AIP1, MLH1, LRRFIP2, BC0221  | 0           | 1 | 0.00 | 0.00 |
| 3p#41022_41052    | 3  | 37703482-37981204   | 277723  | ITGA9, BC040563, CTDSPL                          | 0           | 1 | 0.00 | 0.00 |
| 1p#9935_9998      | 1  | 114980865-115906148 | 925284  | 1, SIKE, SYCP1, TSHB, TSPAN2, NGFB, AK130715, VA | 0           | 1 | 0.00 | 0.00 |
| 1p#9878_9880      | 1  | 114451275-114504401 | 53127   |                                                  | 0           | 1 | 0.00 | 0.00 |
| 3p#41793_41797    | 3  | 45636627-45670933   | 34307   | LIMD1                                            | 0           | 1 | 0.00 | 0.00 |
| 1p#9791_9877      | 1  | 113640937-114424961 | 784025  | PN22, AK123199, C1orf178, AP4B1, DCLRE1B, HIPK1, | 0           | 1 | 0.00 | 0.00 |
| 3p#41798_41837    | 3  | 45678701-45989578   | 310878  | K026206, SACM1L, SLC6A20, LZTFL1, AK093705, CCR  | 0           | 1 | 0.00 | 0.00 |
| 3p#41847_41916    | 3  | 46135954-46879532   | 743579  | RTP3, LRRC2, TDGF1, AK130758, ALS2CL, TMIE, TSH  | 0           | 1 | 0.00 | 0.00 |
| 1p#9999_10008     | 1  | 115912973-116004107 | 91135   | VANGL1, CASQ2                                    | 0           | 1 | 0.00 | 0.00 |
| 1p#10028_10033    | 1  | 116264862-116319770 | 54909   | SLC22A15                                         | 0           | 1 | 0.00 | 0.00 |
| 3p#40821_40870    | 3  | 35142683-35777255   | 634573  | BC035904, ARPP-21                                | 0           | 1 | 0.00 | 0.00 |
| 3p#40879_40885    | 3  | 35901523-36096065   | 194543  |                                                  | 0           | 1 | 0.00 | 0.00 |
| 3p#41838_41846    | 3  | 45998019-46099613   | 101595  | FYCO1, XCR1                                      | 0           | 1 | 0.00 | 0.00 |
| 19p#206951_206968 | 19 | 4069876-4187652     | 117777  | MAP2K2, CREB3L3, SIRT6, BC028236, EB1/3          | 0           | 1 | 0.00 | 0.00 |
| 16q#191227_191234 | 16 | 70665355-70699740   | 34386   | HPR, TXNL4B, DHX38                               | 0           | 1 | 0.00 | 0.00 |
| 16q#191225_191226 | 16 | 70653499-70664866   | 11368   | HPR                                              | 0           | 1 | 0.00 | 0.00 |
| 16q#191019_191041 | 16 | 68906213-69092738   | 186526  | B, DDX19-DDX19L, DDX19A, BC008779, ST3GAL2, FUK  | 0           | 1 | 0.00 | 0.00 |
| 16q#191052_191072 | 16 | 69185820-69340861   | 155042  | MGC34647, LOC92154, VAC14                        | 0           | 1 | 0.00 | 0.00 |
| 16q#190972_190988 | 16 | 68390554-68518572   | 128019  | WWP2                                             | 0           | 1 | 0.00 | 0.00 |

|                   |    |                     |         |                                                    |             |   |      |      |
|-------------------|----|---------------------|---------|----------------------------------------------------|-------------|---|------|------|
| 16q#191009_191018 | 16 | 68838368-68898063   | 59696   | AF126109, AARS, AF353720, DDX19B                   | 0           | 1 | 0.00 | 0.00 |
| 16q#191073_191077 | 16 | 69350231-69381114   | 30884   | VAC14                                              | 0           | 1 | 0.00 | 0.00 |
| 16q#190968_190971 | 16 | 68358514-68378277   | 19764   | WWP2                                               | 0           | 1 | 0.00 | 0.00 |
| 16q#190989_190990 | 16 | 68522492-68525428   | 2937    | WWP2                                               | 0           | 1 | 0.00 | 0.00 |
| 14q#174595_174654 | 14 | 72232974-72673709   | 440736  | DFF3, WDR21A, ZFYVE1, RBM25, PSEN1                 | 0           | 1 | 0.00 | 0.00 |
| 14q#174448_174519 | 14 | 70879023-71614035   | 735013  | AK090477, AK094532, SIPA1L1, RGS6                  | 0           | 1 | 0.00 | 0.00 |
| 9p#119999_120009  | 9  | 17870008-18176806   | 306799  |                                                    | Inf         | 1 | 0.02 | 0.00 |
| 14q#174655_174690 | 14 | 72684427-72975789   | 291363  | PSEN1, PAPLN, NUMB                                 | 0           | 1 | 0.00 | 0.00 |
| 14q#174716_174761 | 14 | 73155855-73514439   | 358585  | A1, C14orf43, BC009202, BC013914, ZADH1, ZNF410, C | 0           | 1 | 0.00 | 0.00 |
| 14q#174801_174808 | 14 | 73799086-73840212   | 41127   | CHX10, ABCD4                                       | Inf         | 1 | 0.02 | 0.00 |
| 14q#174809_174841 | 14 | 73849799-74076393   | 226595  | BC053325, C14orf115, NPC2, HBLD1, LTBP2            | 0           | 1 | 0.00 | 0.00 |
| 9p#120010_120015  | 9  | 18233672-18388314   | 154643  |                                                    | Inf         | 1 | 0.02 | 0.00 |
| 9q#125194_125204  | 9  | 111778583-111921990 | 143408  | SUSD1                                              | 0           | 1 | 0.00 | 0.00 |
| 9q#125895_125932  | 9  | 120237711-120579434 | 341724  | CDK5RAP2, AB011542, AY358370                       | 0           | 1 | 0.00 | 0.00 |
| 14q#169790_169864 | 14 | 19976938-20325233   | 348296  | RNASE9, RNASE11, AK093210, OR6S1, RNASE4, BC09     | 0           | 1 | 0.00 | 0.00 |
| 8p#107535_107546  | 8  | 493525-613346       | 119822  | AK125470, ERICH1                                   | 0           | 1 | 0.00 | 0.00 |
| 9q#125933_125946  | 9  | 120590784-120693062 | 102279  | AK025767, FBXW2, RSM5, AK096706, BC028086          | 0           | 1 | 0.00 | 0.00 |
| 13q#167111_167120 | 13 | 83186445-83356301   | 169857  | SLITRK1                                            | 0           | 1 | 0.00 | 0.00 |
| 8p#107499_107506  | 8  | 63810-202764        | 138955  | BC071667, BC064938, ZNF596                         | 0           | 1 | 0.00 | 0.00 |
| 8p#107518_107524  | 8  | 330992-391413       | 60422   | FBXO25                                             | 0           | 1 | 0.00 | 0.00 |
| 11p#139378_139384 | 11 | 1576460-1601100     | 24641   | HCCA2                                              | 0           | 1 | 0.00 | 0.00 |
| 13q#162499_162503 | 13 | 24017591-24063195   | 45605   | AL137411                                           | 0           | 1 | 0.00 | 0.00 |
| 11p#140415_140472 | 11 | 10305930-10864618   | 558689  | A1, BC028123, XLKD1, MRV1, SH2BP1, EIF4G2, AK127   | 0           | 1 | 0.00 | 0.00 |
| 11p#140641_140662 | 11 | 12865938-13183030   | 317093  | TEAD1, BC015907, AK001432                          | 0           | 1 | 0.00 | 0.00 |
| 8p#107508_107517  | 8  | 219928-320956       | 101029  | BC037297                                           | 0           | 1 | 0.00 | 0.00 |
| 8p#107525_107534  | 8  | 402943-479868       | 76926   | FBXO25, C8orf42                                    | 0           | 1 | 0.00 | 0.00 |
| 8p#107547_107658  | 8  | 619554-1681703      | 1062150 | ERICH1, BC022082, BC030648, DLGAP2                 | 0           | 1 | 0.00 | 0.00 |
| 8p#107675_107678  | 8  | 1821170-1856792     | 35623   | ARHGEF10                                           | 0           | 1 | 0.00 | 0.00 |
| 14q#169865_169884 | 14 | 20329407-20490188   | 160782  | RNASE1, RNASE3, BC096059                           | 0           | 1 | 0.00 | 0.00 |
| 1p#92_99          | 1  | 1549737-1686200     | 136464  | ATAD3A, SSU72, AF161351, CDC2L2                    | 0           | 1 | 0.00 | 0.00 |
| 6q#86834_86835    | 6  | 72087152-72092462   | 5311    | BC110999                                           | 0           | 1 | 0.00 | 0.00 |
| 14q#177879_177881 | 14 | 105833372-105845717 | 12346   | LOC652848                                          | 0           | 1 | 0.00 | 0.00 |
| 10p#128040_128063 | 10 | 115544-328278       | 212735  | ZMYND11, DIP2C                                     | 0           | 1 | 0.00 | 0.00 |
| 10p#128074_128076 | 10 | 418654-441013       | 22360   | DIP2C                                              | 0           | 1 | 0.00 | 0.00 |
| 14q#169885_169915 | 14 | 20494025-20614165   | 120141  | 59, SLC39A2, NDRG2, C14orf8, RNASE13, RNASE7, R    | 0           | 1 | 0.00 | 0.00 |
| 11p#140473_140498 | 11 | 10888204-11266946   | 378743  | AK127230, GALNTL4                                  | 0           | 1 | 0.00 | 0.00 |
| 11p#140542_140584 | 11 | 11789258-12241244   | 451987  | USP47, U32331, DKK3, AK127718, MICAL2              | 0           | 1 | 0.00 | 0.00 |
| 10p#128755_128765 | 10 | 7624317-7699145     | 74829   | ITIH5                                              | 0           | 1 | 0.00 | 0.00 |
| 4q#66877_66893    | 4  | 185109178-185305981 | 196804  | STOX2                                              | 0           | 1 | 0.00 | 0.00 |
| 11p#141345_141378 | 11 | 20839413-21123699   | 284287  | NELL1                                              | 0           | 1 | 0.00 | 0.00 |
| 14q#169985_170000 | 14 | 21108698-21199274   | 90577   | BC063432                                           | 0           | 1 | 0.00 | 0.00 |
| 11p#140499_140541 | 11 | 11278189-11758852   | 480664  | GALNTL4                                            | 0           | 1 | 0.00 | 0.00 |
| 11p#141528_141541 | 11 | 23998040-24365377   | 367338  |                                                    | 0           | 1 | 0.00 | 0.00 |
| 4q#58802_58822    | 4  | 73103208-73402059   | 298852  | NPFRR2                                             | Inf         | 1 | 0.02 | 0.00 |
| 4q#58866_58873    | 4  | 73895641-74119017   | 223377  |                                                    | 0.692294348 | 1 | 0.02 | 0.02 |
| 10q#131526_131531 | 10 | 47010385-47103905   | 93521   |                                                    | 0           | 1 | 0.00 | 0.00 |
| 14q#169916_169932 | 14 | 20618499-20722889   | 104391  | FLJ10357, ZNF219, AK056849, BC031469               | 0           | 1 | 0.00 | 0.00 |
| 4q#66934_66958    | 4  | 185806014-186052646 | 246633  | CR936814, CASP3, FLJ33167, MLF1IP, ACSL1           | 0           | 1 | 0.00 | 0.00 |
| 11p#141246_141254 | 11 | 19782485-19854792   | 72308   | NAV2                                               | 0           | 1 | 0.00 | 0.00 |
| 14q#169953_169984 | 14 | 20922147-21100308   | 178162  | SUPT16H, CHD8, RAB2B, C14orf92, METTL3, SALL2      | 0           | 1 | 0.00 | 0.00 |
| 10p#128423_128466 | 10 | 4292954-4824197     | 531244  | AK095699, CR749391                                 | 0.692294348 | 1 | 0.02 | 0.02 |
| 10p#128678_128714 | 10 | 6690313-7167068     | 476756  | AK096400                                           | 0           | 1 | 0.00 | 0.00 |
| 10p#128745_128754 | 10 | 7472675-7605246     | 132572  | SFMBT2                                             | 0           | 1 | 0.00 | 0.00 |
| 10p#128766_128781 | 10 | 7708828-7838023     | 129196  | ITIH5, ITIH2, KIN                                  | 0           | 1 | 0.00 | 0.00 |
| 10p#129217_129248 | 10 | 13801845-14061745   | 259901  | FRMD4A                                             | 0           | 1 | 0.00 | 0.00 |

|                   |    |                     |        |                                                   |             |   |      |      |
|-------------------|----|---------------------|--------|---------------------------------------------------|-------------|---|------|------|
| 12p#153455_153487 | 12 | 29583681-29835548   | 251868 | TMTC1                                             | 0           | 1 | 0.00 | 0.00 |
| 12p#153552_153553 | 12 | 31162891-31173124   | 10234  | BC039117                                          | 0           | 1 | 0.00 | 0.00 |
| 10q#131532_131534 | 10 | 47125093-47138751   | 13659  | AK057316                                          | 0           | 1 | 0.00 | 0.00 |
| 11p#141725_141730 | 11 | 27257520-27318830   | 61311  | CCDC34                                            | Inf         | 1 | 0.02 | 0.00 |
| 14q#169933_169952 | 14 | 20743994-20914435   | 170442 | BX537733, HNRPC, RFGRIPI1, BC039089, SUPT16H      | 0           | 1 | 0.00 | 0.00 |
| 11p#141244_141245 | 11 | 19763658-19777053   | 13396  | NAV2                                              | 0           | 1 | 0.00 | 0.00 |
| 11p#141506_141508 | 11 | 23232973-23313851   | 80879  |                                                   | 0           | 1 | 0.00 | 0.00 |
| 11p#141644_141675 | 11 | 26185511-26539720   | 354210 | TMEM16C                                           | 0           | 1 | 0.00 | 0.00 |
| 4q#58874_58926    | 4  | 74142549-74756221   | 613673 | FLJ38991, ANKRD17, ALB, AFP, AFM                  | 0.692294348 | 1 | 0.02 | 0.02 |
| 10p#128353_128422 | 10 | 3376799-4275317     | 898519 | BC037918, KLF6, AK055803                          | 0.692294348 | 1 | 0.02 | 0.02 |
| 19q#209519_209528 | 19 | 39305493-39427331   | 121839 | LSM14A                                            | Inf         | 1 | 0.02 | 0.00 |
| 12p#153488_153522 | 12 | 29844505-30731287   | 886783 | IPO8                                              | 0           | 1 | 0.00 | 0.00 |
| 12p#153708_153715 | 12 | 32863594-32914455   | 50862  | PKP2                                              | 0           | 1 | 0.00 | 0.00 |
| 11q#144194_144199 | 11 | 61399097-61420104   | 21008  | FADS3                                             | 0           | 1 | 0.00 | 0.00 |
| 19p#208703_208716 | 19 | 18916741-19047154   | 130414 | SFRS14, ARMC6, MGC26694                           | 0           | 1 | 0.00 | 0.00 |
| 11p#141036_141055 | 11 | 17600287-17794756   | 194470 | AK128214, MYOD1, KCNC1, SERGEF                    | 0           | 1 | 0.00 | 0.00 |
| 11p#141071_141127 | 11 | 17944694-18385271   | 440578 | AY209188, MRGPRX3, BC081538, X51444, SAA4, SAA    | 0           | 1 | 0.00 | 0.00 |
| 11p#141180_141210 | 11 | 18929375-19298000   | 368626 | MRGPRX2, ZDHHC13, CSRP3, BC024010, E2F8           | 0           | 1 | 0.00 | 0.00 |
| 11p#141715_141724 | 11 | 27079375-27225087   | 145713 | BBOX1                                             | 0           | 1 | 0.00 | 0.00 |
| 3q#48100_48111    | 3  | 127670961-127760714 | 89754  | ZXDC, UROC1, CHST13, C3orf22                      | 0           | 1 | 0.00 | 0.00 |
| 3q#48237_48247    | 3  | 129105546-129223325 | 117780 | BX537865, KLHDC6                                  | 0           | 1 | 0.00 | 0.00 |
| 19q#209529_209532 | 19 | 39443606-39470310   | 26705  | AB002353                                          | Inf         | 1 | 0.02 | 0.00 |
| 19q#209654_209660 | 19 | 40522716-40562821   | 40106  | CD22                                              | Inf         | 1 | 0.02 | 0.00 |
| 11q#144153_144157 | 11 | 61035025-61068724   | 33700  | SYT7                                              | 0           | 1 | 0.00 | 0.00 |
| 4q#58343_58364    | 4  | 66914231-67691841   | 777611 |                                                   | 0           | 1 | 0.00 | 0.00 |
| 6p#80800_80811    | 6  | 334423-419886       | 85464  | IRF4, U52682                                      | 0           | 1 | 0.00 | 0.00 |
| 19p#207672_207687 | 19 | 10437300-10538321   | 101022 | PDE4A, KEAP1, EDG8, ATG4D, FLJ12949, CDKN2D       | 0           | 1 | 0.00 | 0.00 |
| 19p#207707_207712 | 19 | 10669576-10704363   | 34788  | QTRT1, AB209213, DNMT2                            | 0           | 1 | 0.00 | 0.00 |
| 11q#144122_144152 | 11 | 60853411-61023409   | 169999 | ASC3, TMEM138, MGC13379, BX537888, FLJ12529, FL   | 0           | 1 | 0.00 | 0.00 |
| 22q#223037_223040 | 22 | 30536497-30554494   | 17998  | DEPDC5                                            | 0           | 1 | 0.00 | 0.00 |
| 3q#48092_48099    | 3  | 127607583-127665806 | 58224  | CCDC37, ZXDC                                      | 0           | 1 | 0.00 | 0.00 |
| 3q#48112_48140    | 3  | 127769321-128041090 | 271770 | TR2IT1, AF171055, BC042038, CHCHD6                | 0           | 1 | 0.00 | 0.00 |
| 3q#48169_48236    | 3  | 128371541-129084385 | 712845 | 5846, BX537548, GPR175, AF289568, MCM2, PODXL2,   | 0           | 1 | 0.00 | 0.00 |
| 3q#48248_48296    | 3  | 129236862-129682236 | 445375 | A1, AK092163, RUVBL1, EEFSEC, DNAJB8, AK097457,   | 0           | 1 | 0.00 | 0.00 |
| 3q#48311_48336    | 3  | 129815355-130048658 | 233304 | AK097792, RPN1, RAB7, BC014200                    | 0           | 1 | 0.00 | 0.00 |
| 3q#48407_48431    | 3  | 130618106-130774645 | 156540 | 3orf25, MBD4, IFT122, BC028353, RHO, H1FOO, PLXNL | 0           | 1 | 0.00 | 0.00 |
| 19q#210045_210052 | 19 | 44012906-44061094   | 48189  | ECH1, AY927476, HNRPL, FLJ45909, SIRI2            | Inf         | 1 | 0.02 | 0.00 |
| 6p#84408_84463    | 6  | 37934330-38433739   | 499410 | TEX27, AK130726, BX537534, BTBD9                  | 0           | 1 | 0.00 | 0.00 |
| 4q#64349_64358    | 4  | 149120603-149199766 | 79164  | ARHGAP10                                          | 0           | 1 | 0.00 | 0.00 |
| 4q#65683_65691    | 4  | 166941062-167088234 | 147173 | BX648971                                          | 0           | 1 | 0.00 | 0.00 |
| 11q#144110_144121 | 11 | 60719221-60847155   | 127935 | PGA5, VWCE, DDB1                                  | 0           | 1 | 0.00 | 0.00 |
| 22q#225328_225341 | 22 | 49179558-49234379   | 54822  | SBF1, ADM2, MIOX, BC002942                        | 0           | 1 | 0.00 | 0.00 |
| 1p#6060_6140      | 1  | 63716851-64511276   | 794426 | KIAA1799, PGM1, ROR1, UBE2U                       | 0           | 1 | 0.00 | 0.00 |
| 2p#26409_26421    | 2  | 91181789-91683893   | 502105 | BX649136, AY010114                                | 0           | 1 | 0.00 | 0.00 |
| 3q#48337_48406    | 3  | 130064862-130609856 | 544995 | GP9, RAB43, KIAA1160, ZNF9, COPG, C3orf37, H1FX   | 0           | 1 | 0.00 | 0.00 |
| 19p#208197_208241 | 19 | 14787533-15086773   | 299241 | A5, OR7C2, SLC1A6, BC028721, CCDC105, CASP14, S   | 0           | 1 | 0.00 | 0.00 |
| 19q#209704_209717 | 19 | 40891319-40941243   | 49925  | ILL4, TMEM149, U2AF1L4, PSENIEN, F25965, HSPB6, L | 0           | 1 | 0.00 | 0.00 |
| 22q#221280_221286 | 22 | 14504218-15403653   | 899436 | BC016035                                          | 0           | 1 | 0.00 | 0.00 |
| 16p#187598_187602 | 16 | 15698008-15723844   | 25837  | NDE1                                              | 1.398928118 | 1 | 0.03 | 0.02 |
| 16p#188961_188976 | 16 | 31177962-31307631   | 129670 | ITGAM, ITGAX                                      | Inf         | 1 | 0.02 | 0.00 |
| 16p#188979_188991 | 16 | 31331166-31396785   | 65620  | ITGAD, AK096248, ARMC5, TGFB11                    | Inf         | 1 | 0.02 | 0.00 |
| 16p#188860_188869 | 16 | 30597200-30664605   | 67406  | AK128030, SRCAP, AB002307                         | 0.692294348 | 1 | 0.02 | 0.02 |
| 18p#200954_200980 | 18 | 3441728-3674577     | 232850 | TGIF, DLGAP1                                      | 0           | 1 | 0.00 | 0.00 |
| 18p#200888_200893 | 18 | 2898141-2950511     | 52371  | EMILIN2, LPIN2                                    | 0           | 1 | 0.00 | 0.00 |
| 6q#93542_93545    | 6  | 163189746-163211454 | 21709  | PACRG                                             | 0           | 1 | 0.00 | 0.00 |

|                   |    |                     |         |                                                    |   |   |      |      |
|-------------------|----|---------------------|---------|----------------------------------------------------|---|---|------|------|
| 18p#200660_200751 | 18 | 364344-1259854      | 895511  | ETN1, CLUL1, C18orf56, TYMS, ENOSF1, YES1, ADCY    | 0 | 1 | 0.00 | 0.00 |
| 18p#200771_200786 | 18 | 1477046-1675004     | 197959  | BC040589                                           | 0 | 1 | 0.00 | 0.00 |
| 18p#200811_200814 | 18 | 2027747-2080103     | 52357   |                                                    | 0 | 1 | 0.00 | 0.00 |
| 9q#123396_123458  | 9  | 90888149-91650134   | 761986  | AF447871, AUH, NFIL3, BC033697, ROR2               | 0 | 1 | 0.00 | 0.00 |
| 9q#123508_123510  | 9  | 92120024-92135307   | 15284   | IARS                                               | 0 | 1 | 0.00 | 0.00 |
| 17p#192915_192919 | 17 | 192700-232516       | 39817   | RPH3AL, BC005153                                   | 0 | 1 | 0.00 | 0.00 |
| 6q#933546_93659   | 6  | 163224483-165137632 | 1913150 | PACRG, AK094729, QKI, BC033352, AK093114           | 0 | 1 | 0.00 | 0.00 |
| 6q#93660_93691    | 6  | 165161669-165743974 | 582306  | AK090788, C6orf118, PDE10A                         | 0 | 1 | 0.00 | 0.00 |
| 16q#192725_192733 | 16 | 87455812-87527132   | 71321   | AK126779, CBFA2T3                                  | 0 | 1 | 0.00 | 0.00 |
| 9q#126964_127047  | 9  | 129185217-129969353 | 784137  | 9orf50, C9orf32, ASB6, PRRX2, PTGES, TOR1B, TOR1,  | 0 | 1 | 0.00 | 0.00 |
| 17p#193822_193828 | 17 | 7544793-7567674     | 22882   | WDR79, EFNB3, AB040936, DNHD3                      | 0 | 1 | 0.00 | 0.00 |
| 2q#37083_37087    | 2  | 233019265-233057516 | 38252   | MGC42174, AK094293                                 | 0 | 1 | 0.00 | 0.00 |
| 9q#127521_127536  | 9  | 134275161-134517512 | 242352  | AK096407, AK090416, RXRA                           | 0 | 1 | 0.00 | 0.00 |
| 17p#192899_192910 | 17 | 29169-141711        | 112543  | RPH3AL                                             | 0 | 1 | 0.00 | 0.00 |
| 17p#193236_193298 | 17 | 2822970-3326209     | 503240  | 4, OR1D2, OR1G1, OR3A1, AJ459867, OR1E2, SPATA2    | 0 | 1 | 0.00 | 0.00 |
| 16q#192797_192833 | 16 | 88067179-88282346   | 215168  | 8, AK095954, CPNE7, CR620135, DPEP1, PCOLN3, C16   | 0 | 1 | 0.00 | 0.00 |
| 9q#127048_127182  | 9  | 129978052-131272937 | 1294886 | 5S, AK057958, CR613887, PRDM12, EXOSC2, ABL1, FI   | 0 | 1 | 0.00 | 0.00 |
| 9q#127553_127628  | 9  | 134654499-135364069 | 709571  | 8C058547, FCN2, CR749452, FCN1, AK057274, OLFM1,   | 0 | 1 | 0.00 | 0.00 |
| 9q#127647_127683  | 9  | 135549380-135739856 | 190477  | 96249, KIAA0649, C9orf116, MRPS2, LCN1, PAEP, AK09 | 0 | 1 | 0.00 | 0.00 |
| 8p#108083_108091  | 8  | 6608854-6679180     | 70327   | XKR5                                               | 0 | 1 | 0.00 | 0.00 |
| 17p#194688_194707 | 17 | 17528651-17687623   | 158973  | RAI1, SREBF1, AL133641                             | 0 | 1 | 0.00 | 0.00 |
| 9q#126931_126963  | 9  | 128895140-129179601 | 284462  | 8B, DOLPP1, CRAT, PPP2R4, AK123797, C9orf106, AK0  | 0 | 1 | 0.00 | 0.00 |
| 9q#127537_127538  | 9  | 134523434-134531880 | 8447    | RXRA                                               | 0 | 1 | 0.00 | 0.00 |
| 17p#193961_193981 | 17 | 8535764-8716218     | 180455  | CCDC42, AK129627, FLJ35773, C17orf38               | 0 | 1 | 0.00 | 0.00 |
| 17p#193991_194000 | 17 | 8803100-8897054     | 93955   | AK129627, NTN1                                     | 0 | 1 | 0.00 | 0.00 |
| 9q#127183_127293  | 9  | 131291519-132285603 | 994085  | 7842, POMT1, UCK1, RAPGEF1, CRSP8, AY358165, N7    | 0 | 1 | 0.00 | 0.00 |
| 9q#127432_127454  | 9  | 133309688-133506185 | 196498  | XO4, ADAMTS13, C9orf7, SLC2A6, AB011177, ADAMTS    | 0 | 1 | 0.00 | 0.00 |
| 9q#127545_127552  | 9  | 134567087-134637907 | 70821   |                                                    | 0 | 1 | 0.00 | 0.00 |
| 9q#127684_127690  | 9  | 135743731-135791721 | 47991   | GLT6D1                                             | 0 | 1 | 0.00 | 0.00 |
| 9q#127720_127749  | 9  | 136041285-136307561 | 266277  | UBADC1, AK129748, BTBD14A                          | 0 | 1 | 0.00 | 0.00 |
| 9q#127513_127520  | 9  | 134022404-134068217 | 45814   | WDR5                                               | 0 | 1 | 0.00 | 0.00 |
| 2q#36956_36961    | 2  | 231869415-231917035 | 47621   | ARMC9                                              | 0 | 1 | 0.00 | 0.00 |
| 2q#37038_37082    | 2  | 232626909-233010618 | 383710  | MGC42174                                           | 0 | 1 | 0.00 | 0.00 |
| 17p#194781_194794 | 17 | 18474499-18693437   | 218939  | 15367, AF041336, BC106034, BC021296, TRIM16L, FBX  | 0 | 1 | 0.00 | 0.00 |
| 9q#127766_127790  | 9  | 136529765-136638866 | 109102  | , SNAPC4, SDCCAG3, PMPCA, INPP5E, AK124843, BC     | 0 | 1 | 0.00 | 0.00 |
| 2q#37015_37037    | 2  | 232401518-232623348 | 221831  | PTMA, PDE6D, COPS7B, BC008846                      | 0 | 1 | 0.00 | 0.00 |
| 2q#37182_37189    | 2  | 233789733-233869067 | 79335   | INPP5D                                             | 0 | 1 | 0.00 | 0.00 |
| 9q#127791_127794  | 9  | 136646484-136665640 | 19157   | AB002308, C9orf163, NOTCH1                         | 0 | 1 | 0.00 | 0.00 |
| 2q#36963_36969    | 2  | 231932667-232000318 | 67652   | ARMC9                                              | 0 | 1 | 0.00 | 0.00 |
| 9q#127294_127431  | 9  | 132291494-133304137 | 1012644 | 71, GF1B, GTF3C5, CEL, AK098728, RALGDS, AF0271    | 0 | 1 | 0.00 | 0.00 |
| 9q#127470_127512  | 9  | 133634956-134003888 | 368933  | VAV2, BC065204, BRD3                               | 0 | 1 | 0.00 | 0.00 |
| 9q#127691_127719  | 9  | 135795093-136030059 | 234967  | 997774, SOHLH1, KCNT1, CAMSAP1, AF116701, AK130    | 0 | 1 | 0.00 | 0.00 |
| 17p#193983_193990 | 17 | 8731647-8791121     | 59475   | PIK3R5, AK129627                                   | 0 | 1 | 0.00 | 0.00 |
| 17p#194272_194299 | 17 | 11782987-12074572   | 291586  | DNAH9, ZNF18, MAP2K4                               | 0 | 1 | 0.00 | 0.00 |
| 17p#194027_194083 | 17 | 9136513-9680542     | 544030  | STX8, WDR16, AK055188, GLP2R                       | 0 | 1 | 0.00 | 0.00 |
| 17p#194211_194217 | 17 | 11156554-11220299   | 63746   | FLJ45455                                           | 0 | 1 | 0.00 | 0.00 |
| 17p#194242_194271 | 17 | 11480725-11774533   | 293809  | DNAH9                                              | 0 | 1 | 0.00 | 0.00 |
| 2q#36451_36467    | 2  | 226741014-226908738 | 167725  | BC017935                                           | 0 | 1 | 0.00 | 0.00 |
| 4p#55812_55881    | 4  | 23054002-24470475   | 1416474 | PPARGC1A, DHX15, AK124473                          | 0 | 1 | 0.00 | 0.00 |
| 4p#56393_56426    | 4  | 35823678-36119167   | 295490  | BC031283, CENTD1, BC037904, AK131492               | 0 | 1 | 0.00 | 0.00 |
| 10p#130788_130830 | 10 | 32421748-32915983   | 494236  | AF286905, EPC1, BX537934, CCDC7, C10orf68          | 0 | 1 | 0.00 | 0.00 |
| 9q#127540_127544  | 9  | 134547308-134558379 | 11072   | RXRA                                               | 0 | 1 | 0.00 | 0.00 |
| 9q#127751_127756  | 9  | 136318059-136342130 | 24072   | LHX3, QSCN6L1                                      | 0 | 1 | 0.00 | 0.00 |
| 9q#127763_127765  | 9  | 136510745-136526041 | 15297   | GPSM1                                              | 0 | 1 | 0.00 | 0.00 |
| 10q#138960_138975 | 10 | 133689721-133854180 | 164460  | C10orf39, DPYSL4                                   | 0 | 1 | 0.00 | 0.00 |

|                   |    |                      |         |                                                     |     |   |      |      |
|-------------------|----|----------------------|---------|-----------------------------------------------------|-----|---|------|------|
| 2q#36970_37014    | 2  | 232012699-232396498  | 383800  | GN17, NCL, AK128584, AK096228, MGC43122, NMUR1      | 0   | 1 | 0.00 | 0.00 |
| 17p#194503_194534 | 17 | 15493685-15931392    | 437708  | 956026, ZNF286, MGC51025, ADORA2B, BC018807, TT     | 0   | 1 | 0.00 | 0.00 |
| 2q#35563_35576    | 2  | 216237556-216448820  | 211265  | AK124897                                            | 0   | 1 | 0.00 | 0.00 |
| 4p#56934_57018    | 4  | 41921156-43416627    | 1495472 | SLC30A9, AK092951, CCDC4, ATP8A1                    | 0   | 1 | 0.00 | 0.00 |
| 10q#131644_131672 | 10 | 49718185-49965766    | 247582  | AK074085, C10orf72                                  | 0   | 1 | 0.00 | 0.00 |
| 2q#35325_35391    | 2  | 213711749-214405980  | 694232  | ZNFN1A2, AK124960, SPAG16                           | 0   | 1 | 0.00 | 0.00 |
| 4p#55805_55811    | 4  | 22848774-22990045    | 141272  |                                                     | 0   | 1 | 0.00 | 0.00 |
| 2q#37326_37347    | 2  | 235597106-235919700  | 322595  | SH3BP4                                              | 0   | 1 | 0.00 | 0.00 |
| 4p#55882_56055    | 4  | 24474645-26586046    | 2111402 | PLK2B, AY629351, AK026677, ANAPC4, SLC34A2, AK0     | 0   | 1 | 0.00 | 0.00 |
| 4p#56271_56392    | 4  | 32045892-35802156    | 3756265 | AK093205, BC036345, BC031283                        | 0   | 1 | 0.00 | 0.00 |
| 10p#130615_130636 | 10 | 30315241-30516322    | 201082  | AK001097, BC071601, BX648192                        | Inf | 1 | 0.02 | 0.00 |
| 10p#130776_130787 | 10 | 32297822-32398500    | 100679  | KIF5B                                               | 0   | 1 | 0.00 | 0.00 |
| 10q#138977_138978 | 10 | 133863214-133871063  | 7850    | DPYSL4, STK32C                                      | 0   | 1 | 0.00 | 0.00 |
| 10q#138987_139028 | 10 | 133941778-134277117  | 335340  | C, AK098366, LRRC27, PWWP2, BC039552, C10orf91, I   | 0   | 1 | 0.00 | 0.00 |
| 2q#37295_37325    | 2  | 234870386-235577515  | 707130  | ARL4C, AF279775                                     | 0   | 1 | 0.00 | 0.00 |
| 17p#194207_194210 | 17 | 11110232-11144808    | 34577   | FLJ45455                                            | 0   | 1 | 0.00 | 0.00 |
| 17p#194218_194241 | 17 | 11228492-11469938    | 241447  | FLJ45455, AK095052, DNAH9                           | 0   | 1 | 0.00 | 0.00 |
| 9q#128034_128039  | 9  | 138284700-138397951  | 113252  | CACNA1B, AB209467, AK092558                         | 0   | 1 | 0.00 | 0.00 |
| 4p#54006_54016    | 4  | 585962-657148        | 71187   | PDE6B, ATP5I                                        | 0   | 1 | 0.00 | 0.00 |
| 10q#138931_138958 | 10 | 133386768-133667024  | 280257  | FLJ46300, PPP2R2D, AB040974, BNIP3, AK091218        | 0   | 1 | 0.00 | 0.00 |
| 10q#139130_139136 | 10 | 135080082-135105054  | 24973   | PAOX, MTG1                                          | 0   | 1 | 0.00 | 0.00 |
| 4p#57019_57027    | 4  | 43431892-43625252    | 193361  |                                                     | 0   | 1 | 0.00 | 0.00 |
| 4p#57080_57105    | 4  | 44300438-44603276    | 302839  | YIPF7, GUF1, BX647242, GNPDA2                       | 0   | 1 | 0.00 | 0.00 |
| 9q#127758_127761  | 9  | 136346643-136494324  | 147682  | AK127730                                            | 0   | 1 | 0.00 | 0.00 |
| 10q#138979_138986 | 10 | 133883942-133930031  | 46090   | STK32C                                              | 0   | 1 | 0.00 | 0.00 |
| 10q#139029_139067 | 10 | 134292039-134598372  | 306334  | INPP5A, C10orf92, C10orf93                          | 0   | 1 | 0.00 | 0.00 |
| 2q#37366_37430    | 2  | 236284143-2366835658 | 551516  | CENTG2, CR608907                                    | 0   | 1 | 0.00 | 0.00 |
| 4p#56056_56270    | 4  | 26597485-32020872    | 5423388 | STM2, FLJ45721, AK125145, BC032043, PCDH7           | 0   | 1 | 0.00 | 0.00 |
| 10q#131927_132000 | 10 | 53139879-53771922    | 632044  | PRKG1, CR603327, LOC440558, DKK1                    | 0   | 1 | 0.00 | 0.00 |
| 2q#37575_37619    | 2  | 238610123-238973185  | 363063  | Y, LOC339768, FLJ43374, C2orf19, ILKAP, AK057399, E | 0   | 1 | 0.00 | 0.00 |
| 2q#37655_37687    | 2  | 239347521-239741439  | 393919  | FLJ43879, HDAC4                                     | 0   | 1 | 0.00 | 0.00 |
| 2q#37915_37948    | 2  | 241765559-242045237  | 279679  | PASK, PPP1R7, TMEIM16G, HDLBP, SEPT2, FARP2         | 0   | 1 | 0.00 | 0.00 |
| 2q#37976_37981    | 2  | 242430070-242633056  | 202987  | GAL3ST2, AK097934                                   | 0   | 1 | 0.00 | 0.00 |
| 2q#37689_37690    | 2  | 239756897-239762856  | 5960    | HDAC4                                               | 0   | 1 | 0.00 | 0.00 |
| 2q#37742_37772    | 2  | 240267906-240517072  | 249167  | AK056439                                            | 0   | 1 | 0.00 | 0.00 |
| 10q#137549_137644 | 10 | 118036689-118997410  | 860722  | NLIP, PNLIPRP1, PNLIPRP2, C10orf82, BC041412, BX6   | 0   | 1 | 0.00 | 0.00 |
| 10q#137743_137763 | 10 | 120072329-120424660  | 352332  | C10orf84, CR607650, AK097728                        | 0   | 1 | 0.00 | 0.00 |
| 2q#26648_26717    | 2  | 97483194-98387168    | 903975  | R1B, BC039374, ZAP70, AK098482, AK098792, MGC267    | 0   | 1 | 0.00 | 0.00 |
| 6p#85204_85221    | 6  | 45363545-45512756    | 149212  | SUPT3H, RUNX2                                       | 0   | 1 | 0.00 | 0.00 |
| 10q#134964_134984 | 10 | 90526686-90703038    | 176353  | ANKRD22, AB037794, STAMBPL1, ACTA2                  | 0   | 1 | 0.00 | 0.00 |
| 10p#130560_130614 | 10 | 29744953-30298467    | 553515  | BC066966, SVIL, AK001097                            | 0   | 1 | 0.00 | 0.00 |
| 10p#130637_130680 | 10 | 30558966-31133027    | 574062  | C043271, AK125211, PAPD1, AL122121, MAP3K8, LYZ     | 0   | 1 | 0.00 | 0.00 |
| 10p#130688_130695 | 10 | 31228861-31293199    | 64339   | ZNF438                                              | Inf | 1 | 0.02 | 0.00 |
| 9q#127795_127798  | 9  | 136672986-136698346  | 25361   | NOTCH1                                              | 0   | 1 | 0.00 | 0.00 |
| 2q#32677_32821    | 2  | 179167520-180683563  | 1516044 | A3, AK129531, TTN, FLJ39502, AL832777, SESTD1, ZN   | 0   | 1 | 0.00 | 0.00 |
| 2q#32822_33079    | 2  | 180693280-184586116  | 3892837 | EUROD1, BC042638, SSFA2, CR600208, PDE1A, DNAJ      | 0   | 1 | 0.00 | 0.00 |
| 2q#34744_34810    | 2  | 206560148-207262079  | 701932  | S1, EEF1B2, GPR1, BC067833, AK093315, AK002005, A   | 0   | 1 | 0.00 | 0.00 |
| 2q#34962_34988    | 2  | 208950137-209267766  | 317630  | PIP5K3, PTHR2                                       | 0   | 1 | 0.00 | 0.00 |
| 22q#224616_224638 | 22 | 42863547-43033690    | 170144  | PARVB, PARVG, BC068280, AB051431                    | 0   | 1 | 0.00 | 0.00 |
| 2q#27939_27967    | 2  | 115102981-115356933  | 253953  | DPP10                                               | 0   | 1 | 0.00 | 0.00 |
| 2q#27993_28036    | 2  | 115598750-115990466  | 391717  | DPP10                                               | 0   | 1 | 0.00 | 0.00 |
| 2q#31473_31516    | 2  | 166036445-166465507  | 429063  | SN2A2, AK126129, TAIP-2, AK096497, GALNT3, BC0562   | 0   | 1 | 0.00 | 0.00 |
| 2q#31532_31682    | 2  | 166597261-168613313  | 2016053 | A, BC029452, SCN9A, SCN7A, AK097519, CMYA3, AK0     | 0   | 1 | 0.00 | 0.00 |
| 2q#31759_31821    | 2  | 169462491-170014695  | 552205  | I, AK093444, NOSTRIN, SPBC25, G6PC2, ABCB11, DH     | 0   | 1 | 0.00 | 0.00 |
| 2q#32463_32622    | 2  | 176862909-178670922  | 1808014 | CR598849, AL137596, HNRPA3, NFE2L2, BX647407, A     | 0   | 1 | 0.00 | 0.00 |



|                   |    |                     |         |  |  |  |  |  |  |  |  |   |   |      |      |      |
|-------------------|----|---------------------|---------|--|--|--|--|--|--|--|--|---|---|------|------|------|
| 2q#28866_28867    | 2  | 128970882-128987110 | 16229   |  |  |  |  |  |  |  |  | 0 | 1 | 0.00 | 0.00 | 0.00 |
| 10q#131846_131926 | 10 | 52430822-53135807   | 704986  |  |  |  |  |  |  |  |  |   |   | 0.00 | 0.00 | 0.00 |
| 10q#132001_132013 | 10 | 53786720-54083408   | 296689  |  |  |  |  |  |  |  |  |   |   | 0.00 | 0.00 | 0.00 |
| 2q#37431_37569    | 2  | 236840449-238551954 | 1711506 |  |  |  |  |  |  |  |  |   |   | 0.00 | 0.00 | 0.00 |
| 2q#37570_37574    | 2  | 238567684-238602765 | 35082   |  |  |  |  |  |  |  |  |   |   | 0.00 | 0.00 | 0.00 |
| 2q#37773_37793    | 2  | 240548660-240704140 | 155481  |  |  |  |  |  |  |  |  |   |   | 0.00 | 0.00 | 0.00 |
| 2q#37894_37914    | 2  | 241577116-241758963 | 181848  |  |  |  |  |  |  |  |  |   |   | 0.00 | 0.00 | 0.00 |
| 10q#137532_137548 | 10 | 117862960-118022746 | 159787  |  |  |  |  |  |  |  |  |   |   | 0.00 | 0.00 | 0.00 |
| 10q#137645_137692 | 10 | 118902112-119328994 | 426883  |  |  |  |  |  |  |  |  |   |   | 0.00 | 0.00 | 0.00 |
| 10q#138086_138193 | 10 | 123712490-124687198 | 974709  |  |  |  |  |  |  |  |  |   |   | 0.00 | 0.00 | 0.00 |
| 2q#37982_37990    | 2  | 242639810-242689920 | 50111   |  |  |  |  |  |  |  |  |   |   | 0.00 | 0.00 | 0.00 |
| 10q#138875_138929 | 10 | 132728172-133357498 | 629327  |  |  |  |  |  |  |  |  |   |   | 0.00 | 0.00 | 0.00 |
| 10q#134896_134906 | 10 | 89696646-89879264   | 182619  |  |  |  |  |  |  |  |  |   |   | 0.00 | 0.00 | 0.00 |
| 10q#134908_134963 | 10 | 89960836-90507399   | 546564  |  |  |  |  |  |  |  |  |   |   | 0.00 | 0.00 | 0.00 |
| 21q#217900_217901 | 21 | 13562263-13582226   | 19964   |  |  |  |  |  |  |  |  |   |   | 0.00 | 0.00 | 0.00 |
| 1p#9070_9078      | 1  | 104731544-105012355 | 280812  |  |  |  |  |  |  |  |  |   |   | 0.00 | 0.00 | 0.00 |
| 22q#224607_224615 | 22 | 42786947-42857528   | 70582   |  |  |  |  |  |  |  |  |   |   | 0.00 | 0.00 | 0.00 |
| 2q#26636_26647    | 2  | 97100064-97480006   | 379943  |  |  |  |  |  |  |  |  |   |   | 0.00 | 0.00 | 0.00 |
| 6p#82942_82979    | 6  | 26265245-26481420   | 216176  |  |  |  |  |  |  |  |  |   |   | 0.00 | 0.00 | 0.00 |
| 6p#83019_83036    | 6  | 26714347-27157099   | 442753  |  |  |  |  |  |  |  |  |   |   | 0.00 | 0.00 | 0.00 |
| 2q#26514_26530    | 2  | 96111009-96224935   | 113927  |  |  |  |  |  |  |  |  |   |   | 0.00 | 0.00 | 0.00 |
| 2q#26612_26634    | 2  | 96925519-97073283   | 147765  |  |  |  |  |  |  |  |  |   |   | 0.00 | 0.00 | 0.00 |
| 2q#26718_27163    | 2  | 98394920-102759437  | 4364518 |  |  |  |  |  |  |  |  |   |   | 0.00 | 0.00 | 0.00 |
| 2q#27213_27226    | 2  | 103814769-104208406 | 393638  |  |  |  |  |  |  |  |  |   |   | 0.00 | 0.00 | 0.00 |
| 2q#33699_34144    | 2  | 193653978-200401586 | 6747609 |  |  |  |  |  |  |  |  |   |   | 0.00 | 0.00 | 0.00 |
| 4p#57028_57079    | 4  | 43648701-44286702   | 638002  |  |  |  |  |  |  |  |  |   |   | 0.00 | 0.00 | 0.00 |
| 4p#57106_57141    | 4  | 44625599-45627785   | 1002187 |  |  |  |  |  |  |  |  |   |   | 0.00 | 0.00 | 0.00 |
| 2q#33683_33693    | 2  | 193020125-193410340 | 390216  |  |  |  |  |  |  |  |  |   |   | 0.00 | 0.00 | 0.00 |
| 2q#34215_34274    | 2  | 201273678-201775093 | 501416  |  |  |  |  |  |  |  |  |   |   | 0.00 | 0.00 | 0.00 |
| 2q#34811_34904    | 2  | 207267361-208406330 | 1138970 |  |  |  |  |  |  |  |  |   |   | 0.00 | 0.00 | 0.00 |
| 2q#35065_35077    | 2  | 210631848-210724974 | 93127   |  |  |  |  |  |  |  |  |   |   | 0.00 | 0.00 | 0.00 |
| 4q#63297_63302    | 4  | 131965530-132137885 | 172356  |  |  |  |  |  |  |  |  |   |   | 0.00 | 0.00 | 0.00 |
| 4q#63378_63435    | 4  | 133848110-135265994 | 1417885 |  |  |  |  |  |  |  |  |   |   | 0.00 | 0.00 | 0.00 |
| 4q#63446_63479    | 4  | 135552714-136213232 | 660519  |  |  |  |  |  |  |  |  |   |   | 0.00 | 0.00 | 0.00 |
| 2q#29102_29104    | 2  | 133285935-133298231 | 12297   |  |  |  |  |  |  |  |  |   |   | 0.00 | 0.00 | 0.00 |
| 2q#32623_32670    | 2  | 178684889-179133670 | 448782  |  |  |  |  |  |  |  |  |   |   | 0.00 | 0.00 | 0.00 |
| 2q#28868_28874    | 2  | 129003725-129142424 | 138700  |  |  |  |  |  |  |  |  |   |   | 0.00 | 0.00 | 0.00 |
| 2q#28892_28914    | 2  | 129686708-130251892 | 565185  |  |  |  |  |  |  |  |  |   |   | 0.00 | 0.00 | 0.00 |
| 2q#34589_34743    | 2  | 204879367-206517274 | 1637908 |  |  |  |  |  |  |  |  |   |   | 0.00 | 0.00 | 0.00 |
| 4q#63337_63347    | 4  | 132983429-133264072 | 280644  |  |  |  |  |  |  |  |  |   |   | 0.00 | 0.00 | 0.00 |
| 2q#31222_31472    | 2  | 16272353-166030072  | 3257720 |  |  |  |  |  |  |  |  |   |   | 0.00 | 0.00 | 0.00 |
| 2q#31822_31890    | 2  | 170021313-170588700 | 567388  |  |  |  |  |  |  |  |  |   |   | 0.00 | 0.00 | 0.00 |
| 2q#32411_32462    | 2  | 176249366-176854391 | 605026  |  |  |  |  |  |  |  |  |   |   | 0.00 | 0.00 | 0.00 |
| 2q#30966_31029    | 2  | 159924747-160498816 | 574070  |  |  |  |  |  |  |  |  |   |   | 0.00 | 0.00 | 0.00 |
| 10q#138405_138537 | 10 | 126949409-128553588 | 1604180 |  |  |  |  |  |  |  |  |   |   | 0.00 | 0.00 | 0.00 |
| 10q#137693_137742 | 10 | 119357979-120058791 | 700813  |  |  |  |  |  |  |  |  |   |   | 0.00 | 0.00 | 0.00 |
| 10q#137929_138018 | 10 | 122230965-123051217 | 820253  |  |  |  |  |  |  |  |  |   |   | 0.00 | 0.00 | 0.00 |
| 10q#138033_138085 | 10 | 123170453-123706614 | 536162  |  |  |  |  |  |  |  |  |   |   | 0.00 | 0.00 | 0.00 |
| 10q#134559_134565 | 10 | 85324227-85521296   | 197070  |  |  |  |  |  |  |  |  |   |   | 0.00 | 0.00 | 0.00 |
| 10q#137764_137791 | 10 | 120435375-120797071 | 361697  |  |  |  |  |  |  |  |  |   |   | 0.00 | 0.00 | 0.00 |
| 1p#6928_7023      | 1  | 74867112-76109675   | 1242564 |  |  |  |  |  |  |  |  |   |   | 0.00 | 0.00 | 0.00 |
| 21q#217895_217899 | 21 | 13334960-13461609   | 126650  |  |  |  |  |  |  |  |  |   |   | 0.00 | 0.00 | 0.00 |
| 9q#127799_127801  | 9  | 136708387-136726498 | 18112   |  |  |  |  |  |  |  |  |   |   | 0.00 | 0.00 | 0.00 |
| 22q#224106_224130 | 22 | 39063669-39249545   | 185877  |  |  |  |  |  |  |  |  |   |   | 0.00 | 0.00 | 0.00 |
| 1p#6844_6927      | 1  | 73620989-74859286   | 1238298 |  |  |  |  |  |  |  |  |   |   | 0.00 | 0.00 | 0.00 |

|                   |    |                     |         |                                                   |  |             |   |      |      |
|-------------------|----|---------------------|---------|---------------------------------------------------|--|-------------|---|------|------|
| 2q#26422_26427    | 2  | 94766131-94918170   | 152040  | AL137712                                          |  | 0           | 1 | 0.00 | 0.00 |
| 2q#26429_26513    | 2  | 94950317-96093905   | 1143589 | F336882, MRPS5, ZNF514, ZNF2, PROM2, KCNIP3, FA   |  | 0           | 1 | 0.00 | 0.00 |
| 2q#26531_26534    | 2  | 96230917-96252095   | 21179   | DUSP2                                             |  | 0           | 1 | 0.00 | 0.00 |
| 2q#26541_26611    | 2  | 96304087-96921480   | 617394  | 735, KIAA1754L, BRRN1, BC012317, CR599306, ARID3  |  | 0           | 1 | 0.00 | 0.00 |
| 2q#28875_28891    | 2  | 129170624-129660802 | 490179  |                                                   |  | 0           | 1 | 0.00 | 0.00 |
| 2q#29070_29101    | 2  | 133004849-133273982 | 269134  | GPR39, LYPD1, AK124659                            |  | 0           | 1 | 0.00 | 0.00 |
| 2q#29356_29371    | 2  | 136171662-136271633 | 99972   | R3HDM1                                            |  | 0           | 1 | 0.00 | 0.00 |
| 2q#29372_29374    | 2  | 136276715-136284893 | 8179    | R3HDM1                                            |  | 0           | 1 | 0.00 | 0.00 |
| 2q#30688_30760    | 2  | 155832025-157294963 | 1462939 | BC032407, NR4A2, AK128708, GPD2, AK093198         |  | 0           | 1 | 0.00 | 0.00 |
| 2q#30851_30916    | 2  | 158713716-159337539 | 623824  | UPP2, LOC130940, PKP4                             |  | 0           | 1 | 0.00 | 0.00 |
| 2q#30917_30965    | 2  | 159348383-159914183 | 565801  | PKP4, AK126351, LOC92196, TANC1                   |  | 0           | 1 | 0.00 | 0.00 |
| 2q#31030_31052    | 2  | 160513736-160710402 | 196667  | LY75, U17033, PLA2R1                              |  | 0           | 1 | 0.00 | 0.00 |
| 2q#31053_31160    | 2  | 160721383-162188751 | 1467369 | 36, BC065192, RBMS1, TANK, PSMD14, TBR1, AK0955   |  | 0           | 1 | 0.00 | 0.00 |
| 2q#31161_31208    | 2  | 162213189-162662016 | 448828  | SLC4A10                                           |  | 0           | 1 | 0.00 | 0.00 |
| 2q#31209_31221    | 2  | 162667126-162763716 | 96591   | BC051190, DPP4                                    |  | 0           | 1 | 0.00 | 0.00 |
| 2q#32383_32386    | 2  | 175776319-175804677 | 28359   | ATF2                                              |  | 0           | 1 | 0.00 | 0.00 |
| 2q#32409_32410    | 2  | 176182248-176213728 | 31481   |                                                   |  | 0           | 1 | 0.00 | 0.00 |
| 2q#33681_33682    | 2  | 192937276-192997337 | 60062   |                                                   |  | 0           | 1 | 0.00 | 0.00 |
| 2q#33694_33698    | 2  | 193437924-193605841 | 167918  | AF223389                                          |  | 0           | 1 | 0.00 | 0.00 |
| 2q#34145_34214    | 2  | 200431918-201265382 | 833465  | J38973, FLJ37953, FLJ22555, DNAPTP6, AK021816, KC |  | 0           | 1 | 0.00 | 0.00 |
| 4q#63312_63336    | 4  | 132494194-132931072 | 436879  |                                                   |  | 0           | 1 | 0.00 | 0.00 |
| 4q#63348_63377    | 4  | 133312115-133812905 | 500791  | AF315093                                          |  | 0           | 1 | 0.00 | 0.00 |
| 4q#63436_63445    | 4  | 135300841-135537774 | 236934  | BX648831                                          |  | 0           | 1 | 0.00 | 0.00 |
| 4q#63495_63530    | 4  | 136779332-137887505 | 1108174 |                                                   |  | 0           | 1 | 0.00 | 0.00 |
| 6p#82939_82941    | 6  | 26249814-26260047   | 10234   |                                                   |  | 0           | 1 | 0.00 | 0.00 |
| 6p#82980_83018    | 6  | 26488612-26706335   | 217724  | A3, BTN3A3, BTN2A1, AB209777, AK097539, BTN1A1, A |  | 0           | 1 | 0.00 | 0.00 |
| 6p#83109_83118    | 6  | 27896040-27933639   | 37600   | HIST1H2AK, BC009783                               |  | 0           | 1 | 0.00 | 0.00 |
| 6p#83129_83131    | 6  | 27974914-27988018   | 13105   | OR2B2                                             |  | 0           | 1 | 0.00 | 0.00 |
| 6p#83132_83221    | 6  | 27988243-28645659   | 657417  | R611340, BC050562, ZNF193, AY781778, ZNF307, C60  |  | 0           | 1 | 0.00 | 0.00 |
| 6p#83222_83269    | 6  | 28650449-29192790   | 542342  | ZNF452, AK056211, RFP, ZNF311, OR2W1, AJ459864    |  | 0           | 1 | 0.00 | 0.00 |
| 6p#83270_83275    | 6  | 29201891-29260804   | 58914   |                                                   |  | Inf         | 1 | 0.02 | 0.00 |
| 6p#83276_83316    | 6  | 29272802-29563507   | 290706  | OR5V1, OR12D3, OR12D2, OR11A1, AJ459854, OR2H1    |  | 0           | 1 | 0.00 | 0.00 |
| 6p#83318_83353    | 6  | 29579371-29818617   | 239247  | 051463, GABBR1, MOG, CR606639, HLA-F, AK096962,   |  | 0           | 1 | 0.00 | 0.00 |
| 6p#84793_84820    | 6  | 41897020-42092660   | 195641  | USP49, TRFP, BYSL, CCND3, AK096276                |  | 0           | 1 | 0.00 | 0.00 |
| 10q#131486_131494 | 10 | 45391874-45468474   | 76601   | MARCH8, ANUBL1                                    |  | 0           | 1 | 0.00 | 0.00 |
| 10q#138360_138404 | 10 | 126518817-126925108 | 406292  | ZRANB1, CTBP2                                     |  | Inf         | 1 | 0.02 | 0.00 |
| 10q#138538_138620 | 10 | 128568055-129524858 | 956804  | DOCK1, LOC387720                                  |  | 0           | 1 | 0.00 | 0.00 |
| 19p#206443_206468 | 19 | 64418-429713        | 365296  | IER2, THEG, BC048290, AL360254, AB001451, C19orf1 |  | 0           | 1 | 0.00 | 0.00 |
| 21q#217921_217925 | 21 | 14320039-14372962   | 52924   | BC070147                                          |  | 0           | 1 | 0.00 | 0.00 |
| 22q#224055_224105 | 22 | 38679812-39059660   | 379849  | GRAP2, CR604186, BC031099, FAM83F, TNRC6B         |  | 0           | 1 | 0.00 | 0.00 |
| 1q#16786_16806    | 1  | 214271913-214515668 | 243756  | SPATA17, BC040896                                 |  | 1.398928118 | 1 | 0.03 | 0.02 |
| 1q#16825_16830    | 1  | 214921600-214975832 | 54233   | TGFB2                                             |  | 1.398928118 | 1 | 0.03 | 0.02 |
| 1q#16853_16871    | 1  | 215552811-215787309 | 234499  | BC086863, LYPLAL1                                 |  | 1.398928118 | 1 | 0.03 | 0.02 |
| 1q#16714_16750    | 1  | 213332233-213705066 | 372834  | ESRRG, BX647076                                   |  | 1.398928118 | 1 | 0.03 | 0.02 |
| 1q#10591_10595    | 1  | 146628190-146661829 | 33640   | BC068044, BC071638                                |  | Inf         | 1 | 0.02 | 0.00 |
| 1q#10572_10573    | 1  | 145647143-145716304 | 69162   |                                                   |  | Inf         | 1 | 0.02 | 0.00 |
| 1q#111740_11767   | 1  | 155241559-155440326 | 198768  | AK057554, OR6Y1, SPTA1                            |  | Inf         | 1 | 0.02 | 0.00 |
| 1q#12107_12119    | 1  | 158097918-158173943 | 76026   | SDHC, C1orf192                                    |  | Inf         | 1 | 0.02 | 0.00 |
| 1q#10861_10884    | 1  | 148556830-148688615 | 131786  | Z3, TDRKH, BC038201, RORC, THEM5, AK130716, THE   |  | Inf         | 1 | 0.02 | 0.00 |
| 1q#10897_10902    | 1  | 148810268-148849322 | 39055   | AK125884, S100A11                                 |  | Inf         | 1 | 0.02 | 0.00 |
| 1q#10934_10948    | 1  | 149135090-149278604 | 143515  | FLG2, AK056431, CRNN                              |  | Inf         | 1 | 0.02 | 0.00 |
| 1q#14774_14782    | 1  | 191376714-191619546 | 242833  |                                                   |  | 1.398928118 | 1 | 0.03 | 0.02 |
| 1q#14848_14875    | 1  | 193186597-193443311 | 256715  | KCNT2, CFH                                        |  | 1.398928118 | 1 | 0.03 | 0.02 |
| 1q#14876_14882    | 1  | 193470554-193527117 | 56564   | CFHR3, CFHR1                                      |  | 0.686886232 | 1 | 0.03 | 0.05 |
| 1q#14921_14989    | 1  | 193860493-194475508 | 615016  | ZBTB41, CRB1, FLJ20054, DENND1B                   |  | 0.686886232 | 1 | 0.03 | 0.05 |

|                   |    |                     |         |                                                   |             |   |      |      |
|-------------------|----|---------------------|---------|---------------------------------------------------|-------------|---|------|------|
| 1q#15042_15098    | 1  | 195265179-196008056 | 742878  | Y00062, PTPRC, BC040869, AK125573                 | 0.686886232 | 1 | 0.03 | 0.05 |
| 1q#15390_15391    | 1  | 199273751-199286518 | 12768   | PPPIR12B                                          | 0.686886232 | 1 | 0.03 | 0.05 |
| 14q#174026_174036 | 14 | 67171153-67231612   | 60460   | ARG2, VT11B, RDH11                                | 0           | 1 | 0.00 | 0.00 |
| 14q#173986_174002 | 14 | 66893975-67003567   | 109593  | ATP6V1D, EIF2S1, PLEK2, FLJ33387                  | 0           | 1 | 0.00 | 0.00 |
| 14q#174013_174025 | 14 | 67085576-67164074   | 78499   | PLEKHH1, PIGH, ARG2                               | 0           | 1 | 0.00 | 0.00 |
| 14q#174037_174069 | 14 | 67241027-67497028   | 256002  | RDH12, AK128496, ZFYVE26, RAD51L1                 | 0           | 1 | 0.00 | 0.00 |
| 14q#173709_173730 | 14 | 64101801-64310798   | 208998  | C14orf50, PLEKHG3, SPTB                           | 0           | 1 | 0.00 | 0.00 |
| 14q#173378_173446 | 14 | 60784559-61339241   | 554683  | C050301, PRKCH, BX648502, AK026100, HIF1A, SNAP   | 0           | 1 | 0.00 | 0.00 |
| 14q#173696_173708 | 14 | 64026840-64097586   | 70747   | ZBTB25, ZBTB1, HSPA2, C14orf50                    | 0           | 1 | 0.00 | 0.00 |
| 14q#173731_173765 | 14 | 64319120-64559463   | 240344  | SPTB, AB209415, CHURC1, GPX2, RAB15, FNTB         | 0           | 1 | 0.00 | 0.00 |
| 14q#173936_173965 | 14 | 66486719-66728915   | 242197  | GPHN, C14orf54                                    | 0           | 1 | 0.00 | 0.00 |
| 14q#174003_174012 | 14 | 67015346-67077870   | 62525   | FLJ33387, PLEKHH1                                 | 0           | 1 | 0.00 | 0.00 |
| 14q#169723_169756 | 14 | 19535787-19761294   | 225508  | BC020999, OR4K13, OR4L1, OR4K17, OR4N5            | 0           | 1 | 0.00 | 0.00 |
| 14q#173473_173489 | 14 | 61670249-62157356   | 487108  | FLJ43390                                          | 0           | 1 | 0.00 | 0.00 |
| 14q#173525_173576 | 14 | 62510603-63007164   | 496562  | KCNH5, RHOJ, GPHB5, PPP2R5E                       | 0           | 1 | 0.00 | 0.00 |
| 14q#177883_177885 | 14 | 105863067-105881323 | 18257   | LOC652848, AK125079                               | 0           | 1 | 0.00 | 0.00 |
| 14q#173766_173814 | 14 | 64565120-65000559   | 435440  | FNTB, MAX, BX161428, AJ536056, FUT8               | 0           | 1 | 0.00 | 0.00 |
| 14q#173932_173935 | 14 | 66433376-66471613   | 38238   | GPHN                                              | 0           | 1 | 0.00 | 0.00 |
| 12p#152260_152265 | 12 | 14725557-14782997   | 57441   | GUCY2C, AK095308                                  | 0           | 1 | 0.00 | 0.00 |
| 14q#173815_173850 | 14 | 65016155-65386848   | 370694  | FUT8                                              | 0           | 1 | 0.00 | 0.00 |
| 14q#173879_173931 | 14 | 65967832-66421440   | 453609  | MGC88374, GPHN                                    | 0           | 1 | 0.00 | 0.00 |
| 12p#152214_152222 | 12 | 14207027-14414866   | 207840  | ATF7IP                                            | 0           | 1 | 0.00 | 0.00 |
| 12p#152246_152250 | 12 | 14595922-14632852   | 36931   | FLJ22662                                          | 0           | 1 | 0.00 | 0.00 |
| 14q#170014_170021 | 14 | 21298107-21354566   | 56460   | BC063432                                          | 0           | 1 | 0.00 | 0.00 |
| 12p#152326_152327 | 12 | 15277303-15285347   | 8045    |                                                   | 0           | 1 | 0.00 | 0.00 |
| 14q#173851_173858 | 14 | 65397098-65474796   | 77699   |                                                   | 0           | 1 | 0.00 | 0.00 |
| 12p#151728_151815 | 12 | 9626736-10249239    | 622504  | CLEC2A, CR625615, FLJ46363, AY547296, CLEC12A, B  | 0           | 1 | 0.00 | 0.00 |
| 3q#49127_49255    | 3  | 139133531-140487089 | 1353559 | M62C, AK126672, Cep70, FAIM, BC035432, PIK3CB, A  | 0           | 1 | 0.00 | 0.00 |
| 11q#144275_144296 | 11 | 62081604-62175150   | 93547   | TIG, RBM21, MTA2, EML3, ROM1, B3GAT3, GANAB, IN   | 0           | 1 | 0.00 | 0.00 |
| 11q#144311_144312 | 11 | 62259438-62264265   | 4828    | TTC9C                                             | 0           | 1 | 0.00 | 0.00 |
| 3p#45338_45341    | 3  | 88037581-88095690   | 58110   |                                                   | 0           | 1 | 0.00 | 0.00 |
| 3p#45350_45354    | 3  | 88166248-88189022   | 22775   | CGGBP1                                            | 0           | 1 | 0.00 | 0.00 |
| 15q#185380_185384 | 15 | 93236051-93315364   | 79314   |                                                   | Inf         | 1 | 0.02 | 0.00 |
| 15q#185394_185408 | 15 | 93584623-93846118   | 261496  | BC040875, AK057337                                | Inf         | 1 | 0.02 | 0.00 |
| 11q#144265_144274 | 11 | 62011032-62075732   | 64701   | AHNAK                                             | 0           | 1 | 0.00 | 0.00 |
| 15q#185409_185422 | 15 | 93859581-94304452   | 444872  |                                                   | Inf         | 1 | 0.02 | 0.00 |
| 3p#45336_45337    | 3  | 87953230-88000559   | 47330   |                                                   | 0           | 1 | 0.00 | 0.00 |
| 3p#45342_45349    | 3  | 88105121-88156514   | 51394   | CR606112, HTR1F                                   | 0           | 1 | 0.00 | 0.00 |
| 3p#45355_45365    | 3  | 88192916-88265764   | 72849   | BC005222                                          | 0           | 1 | 0.00 | 0.00 |
| 15q#180640_180674 | 15 | 48035750-48306609   | 270860  | ATP8B4, SLC27A2                                   | 0           | 1 | 0.00 | 0.00 |
| 3q#49106_49126    | 3  | 138432167-139094840 | 662674  | SOX14                                             | 0           | 1 | 0.00 | 0.00 |
| 3q#45768_45818    | 3  | 99106042-99511532   | 405491  | Zp667G2110, MINA, CR749263, OR5AC2, BC104637, O   | 0           | 1 | 0.00 | 0.00 |
| 3q#45821_45882    | 3  | 99541366-100057184  | 515819  | 7, OR5K4, OR5K3, CLDND1, GPR15, CPOX, ST3GAL6,    | 0           | 1 | 0.00 | 0.00 |
| 3q#46518_46571    | 3  | 109589930-110077781 | 487852  | AB023217, KIAA1524, DZIP3, RETNLB, TRAT1          | 0           | 1 | 0.00 | 0.00 |
| 3q#47253_47469    | 3  | 118426084-121429317 | 3003234 | C3orf9, C3orf1, CD80, ADPRH, PLA1A, POPDC2, BC026 | 0           | 1 | 0.00 | 0.00 |
| 3q#47912_47917    | 3  | 125628798-125680028 | 51231   | KALRN                                             | 0           | 1 | 0.00 | 0.00 |
| 3q#49101_49104    | 3  | 138238578-138328581 | 90004   |                                                   | 0           | 1 | 0.00 | 0.00 |
| 11q#144314_144326 | 11 | 62276127-62328447   | 52321   | ZBTB3, POLR2G, TAF6L, BC035565, NXF1              | Inf         | 1 | 0.02 | 0.00 |
| 11q#144364_144367 | 11 | 62628384-62657558   | 29175   | MGC34821                                          | 0           | 1 | 0.00 | 0.00 |
| 11q#144379_144382 | 11 | 62802841-62835330   | 32490   | SLC22A10                                          | 0.692294348 | 1 | 0.02 | 0.02 |
| 3q#47243_47248    | 3  | 118173745-118296835 | 123091  |                                                   | 0           | 1 | 0.00 | 0.00 |
| 12p#150724_150860 | 12 | 216257-1411100      | 1194844 | CR618406, CCDC77, B4GALNT3, NINJ2, WNK1, AB00     | 0           | 1 | 0.00 | 0.00 |
| 15q#185377_185379 | 15 | 93166465-93214112   | 47648   |                                                   | Inf         | 1 | 0.02 | 0.00 |
| 15q#185385_185393 | 15 | 93342388-93509838   | 227451  |                                                   | 0.692294348 | 1 | 0.02 | 0.02 |
| 11q#144418_144420 | 11 | 63148801-63168246   | 19446   | AK094227, DKFZP564J0863                           | Inf         | 1 | 0.02 | 0.00 |

|                   |    |                     |         |                                                   |             |   |      |      |
|-------------------|----|---------------------|---------|---------------------------------------------------|-------------|---|------|------|
| 3p#45366_45376    | 3  | 88272106-88386516   | 114411  | ZNF654, BC005222, C3orf38                         | 0           | 1 | 0.00 | 0.00 |
| 15q#180675_180683 | 15 | 48313395-48362234   | 48840   | SLC27A2, HDC, GABPB2                              | 0           | 1 | 0.00 | 0.00 |
| 15q#185423_185430 | 15 | 94348247-94499984   | 151738  |                                                   | Inf         | 1 | 0.02 | 0.00 |
| 15q#185504_185508 | 15 | 95523160-95574904   | 51745   |                                                   | Inf         | 1 | 0.02 | 0.00 |
| 15q#185536_185544 | 15 | 95942810-96056913   | 114104  |                                                   | Inf         | 1 | 0.02 | 0.00 |
| 15q#185600_185605 | 15 | 96711592-96759393   | 47802   |                                                   | Inf         | 1 | 0.02 | 0.00 |
| 12q#155019_155034 | 12 | 50255129-50403159   | 148031  | SCN8A                                             | 0           | 1 | 0.00 | 0.00 |
| 19p#208415_208431 | 19 | 16625833-16788515   | 162683  | C19orf42, TMEM38A, LOC284434                      | 0           | 1 | 0.00 | 0.00 |
| 3q#45819_45820    | 3  | 99523908-99534323   | 10416   | BC104637                                          | 0           | 1 | 0.00 | 0.00 |
| 3q#47021_47079    | 3  | 115616641-116182767 | 566127  | ZBTB20                                            | 0           | 1 | 0.00 | 0.00 |
| 3q#47470_47764    | 3  | 121442769-124290029 | 2847261 | PCB1, EAF2, SLC15A2, ILDR1, CD86, CASR, CSTA, CC  | 0           | 1 | 0.00 | 0.00 |
| 3q#47771_47911    | 3  | 124340950-125620818 | 1279869 | ADCY5, PTPLB, BC042384, MYLK, AL122079, CCDC14    | 0           | 1 | 0.00 | 0.00 |
| 3q#47918_48031    | 3  | 125690879-126740105 | 1049227 | PS, ITGB5, MUC13, AB033063, SLC12A8, CR749632, Z  | 0           | 1 | 0.00 | 0.00 |
| 3q#48485_48982    | 3  | 131466826-136830967 | 5364142 | C039375, AK096400, TMEM108, BC040919, BFSP2, AK   | 0           | 1 | 0.00 | 0.00 |
| 19q#209954_209974 | 19 | 43263632-43446170   | 182539  | SIPA1L3, DPF1, PPP1R14A                           | 0.692294348 | 1 | 0.02 | 0.02 |
| 19q#210011_210030 | 19 | 43770011-43908853   | 138843  | J05200, MAP4K1, EIF3S12, ACTN4                    | Inf         | 1 | 0.02 | 0.00 |
| 3q#46572_46987    | 3  | 110087055-115295262 | 5208208 | 1484, CD200, AK131204, BTLA, ATG3, SLC35A5, CCDC  | 0           | 1 | 0.00 | 0.00 |
| 3q#47240_47242    | 3  | 118098131-118149084 | 50954   |                                                   | 0           | 1 | 0.00 | 0.00 |
| 3q#47249_47252    | 3  | 118314588-118402919 | 88332   |                                                   | 0           | 1 | 0.00 | 0.00 |
| 3q#49024_49034    | 3  | 137484551-137570717 | 86167   | PCCB, AB209009, STAG1                             | 0           | 1 | 0.00 | 0.00 |
| 3q#49097_49100    | 3  | 138196499-138229082 | 32584   | FNDC6, AK091255                                   | 0           | 1 | 0.00 | 0.00 |
| 19q#209735_209737 | 19 | 41053050-41062373   | 9324    | APLP1                                             | 0           | 1 | 0.00 | 0.00 |
| 19q#211491_211505 | 19 | 56041853-56125400   | 83548   | KLK3, KLK2, AY533562, KLK4                        | Inf         | 1 | 0.02 | 0.00 |
| 19q#211571_211597 | 19 | 56562554-56763828   | 201275  | VD2, NKG7, LIM2, SIGLEC10, SIGLEC8, SIGLEC12, SIG | 0           | 1 | 0.00 | 0.00 |
| 12p#150705_150723 | 12 | 33854-207342        | 173489  | IQSEC3, AB029033, SLC6A12, SLC6A13                | 0           | 1 | 0.00 | 0.00 |
| 15q#185316_185328 | 15 | 92325602-92510998   | 185397  |                                                   | Inf         | 1 | 0.02 | 0.00 |
| 15q#185368_185376 | 15 | 92918950-93147416   | 228467  | BC043440                                          | 0           | 1 | 0.00 | 0.00 |
| 14q#170317_170363 | 14 | 23624116-23809579   | 185464  | , ISGF3G, REC8L1, IPO4, TM9SF1, TSSK4, CHMP4A, N  | 0           | 1 | 0.00 | 0.00 |
| 15q#180684_180690 | 15 | 48367835-48417893   | 50059   | GABPB2                                            | 0           | 1 | 0.00 | 0.00 |
| 15q#185329_185331 | 15 | 92541263-92571903   | 30641   |                                                   | 0           | 1 | 0.00 | 0.00 |
| 15q#185338_185367 | 15 | 92629025-92890111   | 261087  | AL832717, MCTP2, BC041387, AK026984               | 0           | 1 | 0.00 | 0.00 |
| 15q#185431_185436 | 15 | 94516465-94607602   | 91138   | AK021535                                          | Inf         | 1 | 0.02 | 0.00 |
| 11q#144205_144216 | 11 | 61468039-61597632   | 129594  | VMD2, FTH1                                        | 0           | 1 | 0.00 | 0.00 |
| 11q#144240_144247 | 11 | 61794612-61847263   | 52652   | SCGB2A2, SCGB1D4                                  | 0           | 1 | 0.00 | 0.00 |
| 11q#144250_144251 | 11 | 61896049-61915209   | 19161   | ASRGL1                                            | 0           | 1 | 0.00 | 0.00 |
| 3q#46988_47020    | 3  | 115308528-115604941 | 296414  | DRD3, AK092902, ZNF80, VSIG9, AK022228, ZBTB20    | 0           | 1 | 0.00 | 0.00 |
| 3q#47080_47137    | 3  | 116187931-116891132 | 703202  | ZBTB20, AF279774, GAP43                           | 0           | 1 | 0.00 | 0.00 |
| 3q#47138_47170    | 3  | 116896828-117233069 | 336242  | GAP43, BC041405, LSAMP                            | 0           | 1 | 0.00 | 0.00 |
| 3q#47171_47239    | 3  | 117241951-118070129 | 828179  | LSAMP, BC035185                                   | 0           | 1 | 0.00 | 0.00 |
| 3q#47765_47770    | 3  | 124298092-124333237 | 35146   | PDIA5                                             | 0           | 1 | 0.00 | 0.00 |
| 3q#48983_49023    | 3  | 136853762-137465933 | 612172  | PPP2R3A, MSL2L1, PCCB                             | 0           | 1 | 0.00 | 0.00 |
| 3q#49035_49096    | 3  | 137579268-138180646 | 601379  | STAG1, TMEM22, NCK1, FNDC6                        | 0           | 1 | 0.00 | 0.00 |
| 6p#82354_82384    | 6  | 18385254-18792872   | 407619  | IBRDC2, AK098665                                  | 0           | 1 | 0.00 | 0.00 |
| 12q#154524_154537 | 12 | 46503395-46641873   | 138479  | VDR, AK056442                                     | 0           | 1 | 0.00 | 0.00 |
| 12q#158528_158733 | 12 | 94360285-97256008   | 2895724 | 4H, AF338190, ELK3, PCTK2, AK056076, AK091789, B  | 0           | 1 | 0.00 | 0.00 |
| 15q#185332_185337 | 15 | 92584063-92620775   | 36713   | AL832717                                          | 0           | 1 | 0.00 | 0.00 |
| 19q#211258_211290 | 19 | 54209944-54496661   | 286718  | 00117, KCNA7, SNRP70, LIN7B, PPFIA3, HRC, TRPM4   | 0           | 1 | 0.00 | 0.00 |
| 19q#211489_211490 | 19 | 56029047-56033455   | 4409    |                                                   | Inf         | 1 | 0.02 | 0.00 |
| 16q#189233_189244 | 16 | 46132111-46239948   | 107838  | PHKB                                              | Inf         | 1 | 0.02 | 0.00 |
| 16q#189226_189232 | 16 | 46068125-46125708   | 57584   | PHKB                                              | Inf         | 1 | 0.02 | 0.00 |
| 16q#189415_189417 | 16 | 48586267-48612561   | 26295   |                                                   | 0           | 1 | 0.00 | 0.00 |
| 16q#189448_189461 | 16 | 48864783-48970819   | 106037  | AK093706, ADCY7, BRD7, AF289584                   | 0           | 1 | 0.00 | 0.00 |
| 5q#77160_77166    | 5  | 138752138-138780945 | 28808   | PACAP, AK098740, DNAJC18                          | 0           | 1 | 0.00 | 0.00 |
| 5q#77167_77189    | 5  | 138788669-138996789 | 208121  | DNAJC18, LOC340061, UBE2D2                        | 0           | 1 | 0.00 | 0.00 |
| 1p#10038_10075    | 1  | 116374169-116919301 | 545133  | C1orf161, ATP1A1, BC028281, CD58, IGSF3           | 0           | 1 | 0.00 | 0.00 |

|                   |    |                     |         |                                                     |             |   |      |      |
|-------------------|----|---------------------|---------|-----------------------------------------------------|-------------|---|------|------|
| 1p#10076_10121    | 1  | 116925150-117390391 | 465242  | 1orf137, CD2, PTGFRN, IGSF2, AK124329, TTF2, TRIM4  | 0           | 1 | 0.00 | 0.00 |
| 1p#10122_10130    | 1  | 117402260-117470052 | 67793   | VTCN1                                               | 0           | 1 | 0.00 | 0.00 |
| 19q#210530_210532 | 19 | 48381811-48400825   | 19015   | PSG5, M38046, PSG4                                  | Inf         | 1 | 0.02 | 0.00 |
| 16p#189090_189093 | 16 | 34263350-34297520   | 34171   | AK128166                                            | 1.398928118 | 1 | 0.03 | 0.02 |
| 14q#177142_177159 | 14 | 100085777-100250308 | 164532  | KIAA1446, C14orf70                                  | 0           | 1 | 0.00 | 0.00 |
| 14q#177119_177140 | 14 | 99879507-100069057  | 189551  | WARS, WDR25                                         | 0           | 1 | 0.00 | 0.00 |
| 14q#177160_177198 | 14 | 100257868-100472402 | 214535  | DLK1, AK126659, AB032607, AF422192                  | 0           | 1 | 0.00 | 0.00 |
| 14q#177199_177250 | 14 | 100480598-101114477 | 633880  | J41170, AK021542, AK094562, AK057240, AF469206, D   | 0           | 1 | 0.00 | 0.00 |
| 14q#177520_177537 | 14 | 103222227-103320907 | 98681   | KNS2, XRCC3, ZFYVE21, PPP1R13B                      | 0           | 1 | 0.00 | 0.00 |
| 14q#177052_177065 | 14 | 99428831-99533270   | 104440  | EML1, BC023997                                      | 0           | 1 | 0.00 | 0.00 |
| 14q#177251_177413 | 14 | 101127502-102433516 | 1306015 | R20, U46194, RAGE, AK093342, C14orf131, BX248279, C | 0           | 1 | 0.00 | 0.00 |
| 14q#177430_177519 | 14 | 102544610-103213534 | 668925  | TNFAIP2, CR620068, BC032902, EIF5, MARK3, CKB, C    | 0           | 1 | 0.00 | 0.00 |
| 14q#177538_177565 | 14 | 103333523-103550856 | 217334  | PPP1R13B, AK057986, C14orf2, U56244, TDRD9          | 0           | 1 | 0.00 | 0.00 |
| 14q#176971_177012 | 14 | 98604494-99036942   | 432449  | BCL11B, SETD3, CCNK                                 | 0           | 1 | 0.00 | 0.00 |
| 14q#177021_177051 | 14 | 99150808-99421698   | 270891  | Q39687, KIAA1822, AB058725, AK095603, CYP46A1, E1   | 0           | 1 | 0.00 | 0.00 |
| 14q#176967_176969 | 14 | 98538483-98560362   | 21880   |                                                     | 0           | 1 | 0.00 | 0.00 |
| 14q#177414_177429 | 14 | 102442060-102539885 | 97826   | TRAF3, AF110908, AMN, CDC42BPB                      | 0           | 1 | 0.00 | 0.00 |
| 14q#177566_177570 | 14 | 103558271-103600866 | 42596   | TDRD9                                               | 0           | 1 | 0.00 | 0.00 |
| 14q#177013_177020 | 14 | 99047524-99132809   | 85286   | CCNK, AK123840                                      | 0           | 1 | 0.00 | 0.00 |
| 14q#173677_173690 | 14 | 63876518-63995983   | 119466  | MTHFD1                                              | 0           | 1 | 0.00 | 0.00 |
| 11q#146397_146400 | 11 | 82844021-82850716   | 6696    | DLG2                                                | 1.398928118 | 1 | 0.03 | 0.02 |
| 11q#146401_146418 | 11 | 82855505-82988220   | 132716  | DLG2                                                | 0.692294348 | 1 | 0.02 | 0.02 |
| 11q#146677_146681 | 11 | 85677059-85716379   | 39321   | C11orf73                                            | 0.692294348 | 1 | 0.02 | 0.02 |
| 17p#195022_195024 | 17 | 21406072-21442522   | 36451   | BX640850                                            | 0           | 1 | 0.00 | 0.00 |
| 11q#146395_146396 | 11 | 82826585-82839364   | 12780   |                                                     | 1.398928118 | 1 | 0.03 | 0.02 |
| 12p#152311_152320 | 12 | 15143226-15223993   | 80768   | REG                                                 | 0           | 1 | 0.00 | 0.00 |
| 3q#445522_445531  | 3  | 95021157-95131401   | 110245  | PROS1                                               | 0           | 1 | 0.00 | 0.00 |
| 15q#184359_184369 | 15 | 82381679-82480725   | 99047   | ADAMTSL3                                            | 0           | 1 | 0.00 | 0.00 |
| 15q#184538_184569 | 15 | 84288123-84977184   | 689062  | FLJ32310                                            | 0           | 1 | 0.00 | 0.00 |
| 3q#49461_49568    | 3  | 142835198-143913926 | 1078729 | AF282269, ATP1B3, TFD2, BC013993, MGC40579, XR      | 0           | 1 | 0.00 | 0.00 |
| 3q#49600_49670    | 3  | 144218445-144970972 | 752528  | BC111692, BC028110, CHST2, SLC9A9                   | 0           | 1 | 0.00 | 0.00 |
| 11q#144634_144675 | 11 | 64589723-64851892   | 262170  | M7SF2, FAU, MRPL49, SYVN1, CAPN1, FLJ16331, POL     | 0           | 1 | 0.00 | 0.00 |
| 12p#151478_151493 | 12 | 7016662-7176499     | 159838  | AK055183, C1S, C1R, C1RL, AL833364, RBP5, CLSTN3    | 0           | 1 | 0.00 | 0.00 |
| 15q#184586_184600 | 15 | 85322757-85761182   | 438426  |                                                     | 0           | 1 | 0.00 | 0.00 |
| 11q#144443_144446 | 11 | 63366145-63387442   | 21298   | MARK2                                               | Inf         | 1 | 0.02 | 0.00 |
| 15q#184204_184238 | 15 | 81093020-81377594   | 284575  | CPEB1, BX649159, AP3B2, FSD2, HOMER2                | 0           | 1 | 0.00 | 0.00 |
| 15q#184370_184371 | 15 | 82497944-82513526   | 15583   | ADAMTSL3                                            | 0           | 1 | 0.00 | 0.00 |
| 15q#184386_184463 | 15 | 82916803-83467313   | 550511  | CAND2, WDR73, NMB, AL109690, SEC11L1, ZNF592, A     | 0           | 1 | 0.00 | 0.00 |
| 15q#184523_184537 | 15 | 84066322-84247039   | 180718  | AKAP13, KLHL25                                      | 0           | 1 | 0.00 | 0.00 |
| 15q#184570_184585 | 15 | 85001258-85304043   | 302786  |                                                     | 0           | 1 | 0.00 | 0.00 |
| 15q#184601_184615 | 15 | 85805039-86015153   | 210115  | TMEM83                                              | 0           | 1 | 0.00 | 0.00 |
| 3q#49671_49738    | 3  | 144981480-146386756 | 1405277 | SLC9A9, C3orf58, AF132204                           | 0           | 1 | 0.00 | 0.00 |
| 19q#212286_212337 | 19 | 62410639-62739344   | 328706  | 363, ZNF543, ZNF304, ZNF547, AX721128, ZNF548, ZM   | 1.398928118 | 1 | 0.03 | 0.02 |
| 12q#155848_155899 | 12 | 56122669-56396514   | 273846  | MARS, DDIT3, MBD6, DCTN2, KIF5A, PIP5K2C, AK0964    | 0           | 1 | 0.00 | 0.00 |
| 3q#46144_46148    | 3  | 103054278-103078192 | 23915   | NFKBIZ                                              | 0           | 1 | 0.00 | 0.00 |
| 3q#46187_46195    | 3  | 103575729-103636617 | 60889   | BC031261, ZPLD1                                     | 0           | 1 | 0.00 | 0.00 |
| 3q#49569_49599    | 3  | 143925286-144206681 | 281396  | PC1, PCOLCE2, AK096143, AK093381, PAQR9, BC062      | 0           | 1 | 0.00 | 0.00 |
| 15q#184464_184522 | 15 | 83478799-84060191   | 581393  | PDE8A, AKAP13                                       | 0           | 1 | 0.00 | 0.00 |
| 7p#96589_96625    | 7  | 28370826-28625872   | 255047  | CREB5                                               | 0.692294348 | 1 | 0.02 | 0.02 |
| 3q#46025_46035    | 3  | 101830195-101915715 | 85521   | GPR128, TFG                                         | 0           | 1 | 0.00 | 0.00 |
| 3q#50732_50746    | 3  | 159798549-159914280 | 115732  | MLF1, GFM1, RARRES1                                 | 0           | 1 | 0.00 | 0.00 |
| 15q#185235_185237 | 15 | 91293415-91311594   | 18180   | CHD2                                                | Inf         | 1 | 0.02 | 0.00 |
| 19q#212338_212339 | 19 | 62745071-62749682   | 4612    | AX721128                                            | 0.692294348 | 1 | 0.02 | 0.02 |
| 3p#39410_39415    | 3  | 15516815-15573032   | 56218   | COLQ                                                | 0           | 1 | 0.00 | 0.00 |
| 19q#211333_211342 | 19 | 54763176-54828271   | 65096   | NOSIP, PRRG2, AB033031                              | 0           | 1 | 0.00 | 0.00 |

|                   |    |                     |         |                                                     |     |   |      |      |
|-------------------|----|---------------------|---------|-----------------------------------------------------|-----|---|------|------|
| 1p#1545_1546      | 1  | 16672053-16680476   | 8424    | NBPF1                                               | Inf | 1 | 0.02 | 0.00 |
| 3p#39702_39722    | 3  | 18943768-19270390   | 326623  | KCNH8                                               | 0   | 1 | 0.00 | 0.00 |
| 3q#50747_50814    | 3  | 159922714-160777949 | 855236  | RARRS1, AY070437, MFSD1, AK096479, SCHIP1           | 0   | 1 | 0.00 | 0.00 |
| 12q#155578_155653 | 12 | 54335278-54775772   | 440495  | MDL2, DNAJC14, AK095340, MMP19, WIBG, DGKA, SIL     | 0   | 1 | 0.00 | 0.00 |
| 12q#155900_155914 | 12 | 56401561-56450051   | 48491   | JTG1, TSPAN31, CDK4, MARCH9, AK093897, CYP27B1      | 0   | 1 | 0.00 | 0.00 |
| 9q#122456_122461  | 9  | 77027151-77071107   | 43957   | VPS13A                                              | 0   | 1 | 0.00 | 0.00 |
| 9q#122977_122995  | 9  | 85231150-85463770   | 232621  | AGTPBP1                                             | 0   | 1 | 0.00 | 0.00 |
| 13q#164158_164216 | 13 | 40770243-41273900   | 503658  | NARG1L, RGC32, KIAA0564                             | 0   | 1 | 0.00 | 0.00 |
| 13q#164217_164291 | 13 | 41283309-41906771   | 623463  | KIAA0564, AK092199, DGKH, BC044822, AKAP11          | 0   | 1 | 0.00 | 0.00 |
| 13q#164905_164906 | 13 | 48367780-48394322   | 26543   |                                                     | 0   | 1 | 0.00 | 0.00 |
| 13q#162079_162084 | 13 | 19380708-19442241   | 61534   | ZNF198                                              | 0   | 1 | 0.00 | 0.00 |
| 13q#164907_164958 | 13 | 48412126-48826945   | 414820  | FNDC3A, MLNR, CDADC1, CAB39L                        | 0   | 1 | 0.00 | 0.00 |
| 13q#162045_162062 | 13 | 19120561-19246169   | 125609  | HSMPP8, BC014184, PSPC1                             | 0   | 1 | 0.00 | 0.00 |
| 13q#162085_162113 | 13 | 19451776-19672104   | 220329  | ZNF198, GJB2, AF091526                              | 0   | 1 | 0.00 | 0.00 |
| 13q#162949_163012 | 13 | 28057635-28793650   | 736016  | C13orf12, LOC283537, KIAA0774                       | 0   | 1 | 0.00 | 0.00 |
| 13q#162070_162078 | 13 | 19295454-19357586   | 62133   | BX647750, AF161535, ZMYM5, BC024195                 | 0   | 1 | 0.00 | 0.00 |
| 13q#164292_164383 | 13 | 41945936-42849701   | 903766  | C040889, TNFSF11, FLJ40919, EPST11, DNAJC15, FIG    | 0   | 1 | 0.00 | 0.00 |
| 13q#161958_161967 | 13 | 18065953-18369449   | 303497  |                                                     | 0   | 1 | 0.00 | 0.00 |
| 13q#162935_162948 | 13 | 27905902-28039191   | 133290  | FLT1                                                | 0   | 1 | 0.00 | 0.00 |
| 13q#162063_162069 | 13 | 19254966-19283520   | 28555   | PSPC1                                               | 0   | 1 | 0.00 | 0.00 |
| 13q#162114_162136 | 13 | 19676847-19911860   | 235014  | GJB6, CRYL1                                         | 0   | 1 | 0.00 | 0.00 |
| 13q#163013_163020 | 13 | 28799288-2886757    | 87470   | KIAA0774                                            | 0   | 1 | 0.00 | 0.00 |
| 13q#163021_163044 | 13 | 28894641-29064841   | 170201  | KIAA0774, SLC7A1                                    | 0   | 1 | 0.00 | 0.00 |
| 10q#133234_133254 | 10 | 70674219-70840924   | 166706  | HKDC1, HK1, TACR2                                   | 0   | 1 | 0.00 | 0.00 |
| 10q#133465_133469 | 10 | 72861374-72902647   | 41274   | CDH23                                               | 0   | 1 | 0.00 | 0.00 |
| 11p#139293_139305 | 11 | 928872-1038845      | 109974  | AP2A2, M22406                                       | 0   | 1 | 0.00 | 0.00 |
| 13q#162137_162179 | 13 | 19918941-20273116   | 354176  | IL1, IFT88, AK090862, IL17D, AK055408, LOC221143, X | 0   | 1 | 0.00 | 0.00 |
| 11p#139185_139219 | 11 | 274838-476165       | 201328  | ATHL1, IFITM1, IFITM3, B4GALNT4, PKP3, SIGIRR, T    | 0   | 1 | 0.00 | 0.00 |
| 11p#139234_139266 | 11 | 562229-760281       | 198053  | CDHL, BC007626, DRD4, DEAF1, TMEM80, EPS8L2, TA     | 0   | 1 | 0.00 | 0.00 |
| 10q#133282_133305 | 10 | 71103722-71388664   | 284943  | COL13A1                                             | 0   | 1 | 0.00 | 0.00 |
| 10q#133451_133464 | 10 | 72746972-72854258   | 107287  | SLC29A3, CDH23                                      | 0   | 1 | 0.00 | 0.00 |
| 11p#139228_139233 | 11 | 535874-557037       | 21164   | LRRC56, C11orf35, RASSF7, AK123483                  | 0   | 1 | 0.00 | 0.00 |
| 11p#139267_139292 | 11 | 764309-921704       | 157396  | RDD, RPLP2, PNPLA2, BC011958, EFCAB4A, CD151, P     | 0   | 1 | 0.00 | 0.00 |
| 10q#133470_133472 | 10 | 72912045-72924981   | 12937   | CDH23                                               | 0   | 1 | 0.00 | 0.00 |
| 10q#132809_132811 | 10 | 66018580-66081833   | 63254   |                                                     | Inf | 1 | 0.02 | 0.00 |
| 10q#132861_132920 | 10 | 67328387-67881616   | 553230  | CTNNA3                                              | 0   | 1 | 0.00 | 0.00 |
| 10q#132935_132977 | 10 | 68041271-68417373   | 376103  | CTNNA3                                              | 0   | 1 | 0.00 | 0.00 |
| 10q#133255_133281 | 10 | 70845261-71081116   | 235856  | TACR2, TSPAN15, NEUROG3, C10orf35                   | 0   | 1 | 0.00 | 0.00 |
| 10q#133439_133450 | 10 | 72644150-72739137   | 94988   | UNC5B                                               | 0   | 1 | 0.00 | 0.00 |
| 10q#133473_133502 | 10 | 72937043-73190278   | 253236  | CDH23                                               | 0   | 1 | 0.00 | 0.00 |
| 11p#143386_143389 | 11 | 51244499-51286661   | 42163   |                                                     | 0   | 1 | 0.00 | 0.00 |
| 10q#133306_133375 | 10 | 71397498-71920711   | 523214  | PPA1, NPFFR1, LRRC20, BC015007, EIF4EBP2, CR627     | 0   | 1 | 0.00 | 0.00 |
| 10q#133384_133438 | 10 | 71997861-72633325   | 635465  | 274, PRF1, ADAMTS14, C10orf27, SGPL1, AB033078, F   | 0   | 1 | 0.00 | 0.00 |
| 10q#132679_132785 | 10 | 63939241-65370808   | 1431568 | C10orf22, EGR2, NRBF2, JMJD1C, AK027280, BC00786    | Inf | 1 | 0.02 | 0.00 |
| 10q#132796_132808 | 10 | 65642337-66005024   | 362688  |                                                     | Inf | 1 | 0.02 | 0.00 |
| 10q#132921_132934 | 10 | 67894066-68029500   | 135435  | CTNNA3                                              | 0   | 1 | 0.00 | 0.00 |
| 10q#133376_133383 | 10 | 71936360-71992754   | 56395   | KIAA1274                                            | 0   | 1 | 0.00 | 0.00 |
| 10q#133503_133510 | 10 | 73199695-73255655   | 55961   | CDH23, PSAP                                         | 0   | 1 | 0.00 | 0.00 |
| 11q#143554_143571 | 11 | 55950697-56066561   | 115865  | OR5M11                                              | 0   | 1 | 0.00 | 0.00 |
| 10q#132786_132795 | 10 | 65410165-65608139   | 197975  |                                                     | 0   | 1 | 0.00 | 0.00 |
| 11p#143390_143396 | 11 | 51292202-51381967   | 89766   |                                                     | 0   | 1 | 0.00 | 0.00 |
| 4q#60109_60133    | 4  | 88031294-88240224   | 208931  | PTPN13, SLC10A6, MGC26744, AK057662, BC017432       | 0   | 1 | 0.00 | 0.00 |
| 4q#60205_60286    | 4  | 88922949-89757705   | 834757  | MEPE, SPP1, PKD2, ABCG2, AB209400, PPM1K, BCG       | 0   | 1 | 0.00 | 0.00 |
| 4q#60294_60312    | 4  | 89809020-89979502   | 170483  | HERC3                                               | 0   | 1 | 0.00 | 0.00 |
| 4q#60495_60500    | 4  | 92078857-92110875   | 32019   | AB051467                                            | 0   | 1 | 0.00 | 0.00 |

|                   |    |                     |         |                                                   |     |   |      |      |
|-------------------|----|---------------------|---------|---------------------------------------------------|-----|---|------|------|
| 10q#132406_132523 | 10 | 60701876-61979385   | 1277510 | AM13C1, SLC16A9, AB019391, CCDC6, ANK3, BX5379    | Inf | 1 | 0.02 | 0.00 |
| 10q#132578_132678 | 10 | 62642846-63927392   | 1284547 | 41470, C10orf107, ARID5B, AK096671, PLEKHK1, BX64 | Inf | 1 | 0.02 | 0.00 |
| 10q#134281_134298 | 10 | 81630974-81787510   | 156537  | BC071736, SFTPD                                   | Inf | 1 | 0.02 | 0.00 |
| 11q#143543_143553 | 11 | 55885185-55942325   | 57141   | OR8J1                                             | 0   | 1 | 0.00 | 0.00 |
| 4q#61317_61332    | 4  | 102323463-102466387 | 142925  | PPP3CA                                            | 0   | 1 | 0.00 | 0.00 |
| 4q#61350_61390    | 4  | 102634256-103180579 | 546324  | AK091523, BANK1                                   | 0   | 1 | 0.00 | 0.00 |
| 4q#61430_61553    | 4  | 103669672-105398168 | 1728497 | UBE2D3, LOC493856, LOC150159, BC009732, LOC133    | 0   | 1 | 0.00 | 0.00 |
| 11q#143532_143542 | 11 | 55800603-55881177   | 80575   | OR5T1, OR8K3                                      | 0   | 1 | 0.00 | 0.00 |
| 4q#59856_59924    | 4  | 85032178-86011706   | 979529  | BC005018, AK095285, NKX6-1, CDS1, WDFY3           | 0   | 1 | 0.00 | 0.00 |
| 4q#60008_60044    | 4  | 87061056-87398573   | 337518  | ARHGAP24, MAPK10                                  | 0   | 1 | 0.00 | 0.00 |
| 4q#60501_60535    | 4  | 92116214-92386868   | 270655  | AB051467                                          | 0   | 1 | 0.00 | 0.00 |
| 4q#60543_60547    | 4  | 92452160-92503064   | 50905   | AB051467                                          | 0   | 1 | 0.00 | 0.00 |
| 4q#60890_60909    | 4  | 96466926-96637434   | 170509  | UNC5C                                             | 0   | 1 | 0.00 | 0.00 |
| 10q#132324_132405 | 10 | 59654044-60693834   | 1039791 | UBE2D1, TFAM, AY726586, BX538102, AK055418, PH    | Inf | 1 | 0.02 | 0.00 |
| 10q#132524_132577 | 10 | 61999343-62626875   | 627533  | BX537917, CDC2, RHOTB1                            | Inf | 1 | 0.02 | 0.00 |
| 4q#60287_60293    | 4  | 89765317-89804640   | 39324   | HERC5                                             | 0   | 1 | 0.00 | 0.00 |
| 4q#60313_60361    | 4  | 89985677-90442893   | 457217  | HERC3, AK126217, FAM13A1, AK091881, TIGD2         | 0   | 1 | 0.00 | 0.00 |
| 1p#9037_9044      | 1  | 103810269-103875831 | 65563   | AMY2B, BC007060, AMY2A                            | 0   | 1 | 0.00 | 0.00 |
| 10q#134279_134280 | 10 | 80943483-81263444   | 319962  | BC070048, BC026229                                | Inf | 1 | 0.02 | 0.00 |
| 10q#134299_134335 | 10 | 81799086-82092217   | 293132  | 1673, C10orf57, PLAC9, ANXA11, BC048265, MAT1A, D | Inf | 1 | 0.02 | 0.00 |
| 15q#179191_179289 | 15 | 34274708-35597138   | 1322431 | AK096400, AK026504, C15orf41, AK023254, MEIS2     | 0   | 1 | 0.00 | 0.00 |
| 15q#179362_179517 | 15 | 36618279-38249587   | 1631309 | FLJ39531, THBS1, FSIP1, GPR176, BC042903, EIF2AK  | 0   | 1 | 0.00 | 0.00 |
| 4q#61391_61429    | 4  | 103190452-103649205 | 458754  | BANK1, SLC39A8                                    | 0   | 1 | 0.00 | 0.00 |
| 4q#61554_61567    | 4  | 105431082-105745094 | 314013  |                                                   | 0   | 1 | 0.00 | 0.00 |
| 4q#61648_61656    | 4  | 106781392-106868214 | 86823   | FLJ20184                                          | 0   | 1 | 0.00 | 0.00 |
| 4q#61694_61739    | 4  | 107188410-107640842 | 452433  | 9NT, AK125988, AF161420, MGC16169, AK074305, SCY  | 0   | 1 | 0.00 | 0.00 |
| 10q#132217_132323 | 10 | 56800167-59644614   | 2844448 | AK126923, ZWINT, IPMK                             | 0   | 1 | 0.00 | 0.00 |
| 15q#179317_179361 | 15 | 36140050-36605816   | 465767  | BC037952, SPRED1, FAM98B, RASGRP1                 | 0   | 1 | 0.00 | 0.00 |
| 15q#179518_179529 | 15 | 38255750-38356917   | 101168  | BUB1B, AB208782, PAK6                             | 0   | 1 | 0.00 | 0.00 |
| 4q#61568_61647    | 4  | 105752861-106769839 | 1016979 | AK127778, AK094561, FLJ20032, AB075496, BC11051   | 0   | 1 | 0.00 | 0.00 |
| 4q#61657_61693    | 4  | 106873481-107180602 | 307122  | FLJ20184, AK129951, INTS12, GSTCD, NPNT           | 0   | 1 | 0.00 | 0.00 |
| 11q#143397_143404 | 11 | 54789837-54877939   | 88103   | TRIM48, OR4A16                                    | 0   | 1 | 0.00 | 0.00 |
| 15q#179530_179531 | 15 | 38367388-38375138   | 7751    | PLCB2                                             | 0   | 1 | 0.00 | 0.00 |
| 10q#134379_134403 | 10 | 82575793-83445414   | 869622  |                                                   | 0   | 1 | 0.00 | 0.00 |
| 11q#143446_143449 | 11 | 55252451-55280149   | 27699   |                                                   | 0   | 1 | 0.00 | 0.00 |
| 1p#6195_6258      | 1  | 65206228-65779192   | 572965  | AK3L1, BC051722, DNAJC6, LEPR                     | 0   | 1 | 0.00 | 0.00 |
| 11q#143441_143445 | 11 | 55200744-55238259   | 37516   |                                                   | 0   | 1 | 0.00 | 0.00 |
| 2q#29029_29032    | 2  | 132124672-132166607 | 41936   | CCDC74A                                           | 0   | 1 | 0.00 | 0.00 |
| 2q#29033_29037    | 2  | 132178507-132248171 | 69665   | BC036114                                          | 0   | 1 | 0.00 | 0.00 |
| 5q#70690_70701    | 5  | 50268244-50679952   | 411709  |                                                   | 0   | 1 | 0.00 | 0.00 |
| 5q#70702_70708    | 5  | 50692692-50725758   | 33067   | CR936786, CR604031, BC031213, ISL1                | 0   | 1 | 0.00 | 0.00 |
| 15q#182976_183003 | 15 | 69823246-70000444   | 177199  | THSD4, BC041421, NR2E3, MYO9A                     | 0   | 1 | 0.00 | 0.00 |
| 5q#70709_70714    | 5  | 50733706-50813616   | 79911   |                                                   | 0   | 1 | 0.00 | 0.00 |
| 5q#70659_70678    | 5  | 49774457-50089296   | 314840  | PARP8                                             | 0   | 1 | 0.00 | 0.00 |
| 5q#70648_70658    | 5  | 49595677-49764985   | 169309  | EMB                                               | 0   | 1 | 0.00 | 0.00 |
| 15q#183026_183030 | 15 | 70194283-70216622   | 22340   | MYO9A, SENP8                                      | Inf | 1 | 0.02 | 0.00 |
| 15q#183004_183011 | 15 | 70005074-70074726   | 69653   | MYO9A                                             | Inf | 1 | 0.02 | 0.00 |
| 15q#181895_181906 | 15 | 60437049-60639453   | 202405  | BX647086                                          | 0   | 1 | 0.00 | 0.00 |
| 15q#182852_182922 | 15 | 68781292-69405260   | 623969  | A, LARP6, AK123672, THAP10, LRRRC49, AK131551, TH | 0   | 1 | 0.00 | 0.00 |
| 15q#182974_182975 | 15 | 69808153-69817044   | 8892    | THSD4                                             | 0   | 1 | 0.00 | 0.00 |
| 5q#78435_78442    | 5  | 151257251-151333741 | 76491   | GLRA1, AK001582                                   | 0   | 1 | 0.00 | 0.00 |
| 15q#182046_182104 | 15 | 61859583-62233447   | 373865  | HERC1, DAPK2, FAM96A, SNX1, SNX22                 | 0   | 1 | 0.00 | 0.00 |
| 15q#182698_182747 | 15 | 66961657-67340452   | 378796  | BC017035, NOX5, AK074071, AK097560, GLCE          | 0   | 1 | 0.00 | 0.00 |
| 15q#182849_182851 | 15 | 68763606-68774473   | 10868   | UACA                                              | 0   | 1 | 0.00 | 0.00 |
| 15q#181537_181628 | 15 | 56912641-57637328   | 724688  | 163B, SLTM, RNF111, CCNB2, AK023404, MYO1E, FAM   | 0   | 1 | 0.00 | 0.00 |

|                   |    |                     |        |                                                     |             |   |      |      |
|-------------------|----|---------------------|--------|-----------------------------------------------------|-------------|---|------|------|
| 1p#10152_10184    | 1  | 11777733-118205568  | 427836 | MAN1A2, FAM46C, GDAP2, WDR3                         | 0           | 1 | 0.00 | 0.00 |
| 16p#189017_189030 | 16 | 31642657-31782341   | 139685 | ZNF720, CR611323                                    | Inf         | 1 | 0.02 | 0.00 |
| 16p#188713_188795 | 16 | 29581455-30240082   | 658628 | BOLA2, AK123224                                     | Inf         | 1 | 0.02 | 0.00 |
| 1q#15246_15253    | 1  | 198002552-198064410 | 61859  | PKP1, TNNI2                                         | 0.692294348 | 1 | 0.02 | 0.02 |
| 1q#16751_16785    | 1  | 213726453-214259688 | 533236 | GPATC2, SPATA17                                     | 1.398928118 | 1 | 0.03 | 0.02 |
| 1q#16831_16852    | 1  | 214987849-215523361 | 535513 | TGFB2                                               | 1.398928118 | 1 | 0.03 | 0.02 |
| 1q#16872_16884    | 1  | 215798868-216129659 | 330792 |                                                     | 1.398928118 | 1 | 0.03 | 0.02 |
| 1q#10600_10614    | 1  | 146679306-146765273 | 85968  | A1, BC034038, SV2A, SF3B4, MTMR11, BC015719, ZAN    | Inf         | 1 | 0.02 | 0.00 |
| 1q#10615_10617    | 1  | 146772938-146787043 | 14106  | ZA20D1                                              | Inf         | 1 | 0.02 | 0.00 |
| 1q#10958_10961    | 1  | 149352010-149365944 | 13935  | LCE3E, LCE3D                                        | Inf         | 1 | 0.02 | 0.00 |
| 1q#11055_11087    | 1  | 149948489-150175768 | 227280 | 5, LELP1, LOR, PGLYRP3, PGLYRP4, S100A9, S100A1     | Inf         | 1 | 0.02 | 0.00 |
| 1q#15109_15111    | 1  | 196252180-196347503 | 95324  |                                                     | 0.686886232 | 1 | 0.03 | 0.05 |
| 1q#15220_15229    | 1  | 197747619-197829639 | 82021  | CACNA1S                                             | 0.692294348 | 1 | 0.02 | 0.02 |
| 1q#15329_15330    | 1  | 198710905-198717889 | 6985   | ELF3, AK129946                                      | 0.686886232 | 1 | 0.03 | 0.05 |
| 1q#15394_15395    | 1  | 199316962-199322569 | 5608   | SYT2                                                | 0.686886232 | 1 | 0.03 | 0.05 |
| 1q#16062_16158    | 1  | 206131117-207029493 | 898377 | NS2, HSD11B1, TRAF3IP3, C1orf74, IRF6, C1orf107, SY | 1.044194198 | 1 | 0.05 | 0.05 |
| 14q#177827_177844 | 14 | 105369044-105481977 | 112934 | LOC652848                                           | 0           | 1 | 0.00 | 0.00 |
| 14q#177634_177641 | 14 | 104040166-104093061 | 52896  |                                                     | 0           | 1 | 0.00 | 0.00 |
| 14q#177650_177695 | 14 | 104138901-104388629 | 249729 | 111, C14orf151, C14orf173, LOC388022, ADSSL1, SIVA  | 0           | 1 | 0.00 | 0.00 |
| 14q#177696_177702 | 14 | 104395858-104435987 | 40130  | AY094612, KIAA0284                                  | 0           | 1 | 0.00 | 0.00 |
| 14q#177735_177754 | 14 | 104643105-104766482 | 123378 | JAG2, NUDT14, BRF1                                  | 0           | 1 | 0.00 | 0.00 |
| 14q#177642_177649 | 14 | 104097482-104131496 | 34015  | LOC400258, FLJ42486                                 | 0           | 1 | 0.00 | 0.00 |
| 14q#177703_177734 | 14 | 104441762-104622115 | 180354 | BC090889, BC004283, C14orf79, CDCA4, BC068024, G    | 0           | 1 | 0.00 | 0.00 |
| 20p#213301_213348 | 20 | 8298179-8732975     | 434797 | PLCB1                                               | Inf         | 1 | 0.02 | 0.00 |
| 14q#177796_177798 | 14 | 105063476-105071753 | 8278   | S55096, TMEM121                                     | 0           | 1 | 0.00 | 0.00 |
| 20p#213209_213217 | 20 | 6662243-6731878     | 69636  | BMP2                                                | 0           | 1 | 0.00 | 0.00 |
| 20p#213419_213424 | 20 | 9408444-9444133     | 35690  | PLCB4, AK096264, C20orf103                          | 0           | 1 | 0.00 | 0.00 |
| 3p#38519_38545    | 3  | 6123241-6682284     | 559044 | AF279782                                            | 0           | 1 | 0.00 | 0.00 |
| 3p#38644_38684    | 3  | 7666445-8416454     | 750010 | GRM7, AK124857, BC020876                            | 0           | 1 | 0.00 | 0.00 |
| 3p#38685_38712    | 3  | 8424815-8724559     | 299745 | 5, LMCD1, LOH3CR2A, BC052614, C3orf32, AK122938,    | Inf         | 1 | 0.02 | 0.00 |
| 3p#38732_38763    | 3  | 8912644-9214045     | 301402 | RAD18, SRGAP3                                       | Inf         | 1 | 0.02 | 0.00 |
| 11q#144691_144696 | 11 | 64957546-65003942   | 46397  | AF001893                                            | 0           | 1 | 0.00 | 0.00 |
| 3p#38764_38855    | 3  | 9222139-9928629     | 706491 | C3orf29, CPNE9, BRPF1, OGG1, CAMK1, TADA3L, AF      | Inf         | 1 | 0.02 | 0.00 |
| 3p#38862_38870    | 3  | 9965247-10016563    | 51317  | PRRT3, AF230335, TMEM111                            | Inf         | 1 | 0.02 | 0.00 |
| 19q#212075_212081 | 19 | 60544297-60575439   | 31143  | SUV420H2, COX6B2, AK128284, IL11                    | 0           | 1 | 0.00 | 0.00 |
| 3q#51311_51336    | 3  | 168770684-168998408 | 22725  | WDR49, AK097556, PDCD10, SERPIN1                    | 0           | 1 | 0.00 | 0.00 |
| 3q#51373_51385    | 3  | 169652127-169954285 | 302159 |                                                     | 0           | 1 | 0.00 | 0.00 |
| 1q#11675_11739    | 1  | 154643174-155227930 | 584757 | D1D, AK097921, CR603267, CD1A, CD1C, AK130822, C    | Inf         | 1 | 0.02 | 0.00 |
| 1q#13159_13185    | 1  | 169864853-170180842 | 315990 | TNFSF4, AK127238, LOC646870, PRDX6                  | 1.398928118 | 1 | 0.03 | 0.02 |
| 1q#10596_10598    | 1  | 146665747-146672032 | 6286   | HIST2H2BE, HIST2H2AC                                | Inf         | 1 | 0.02 | 0.00 |
| 1q#11548_11566    | 1  | 153440271-153552895 | 112625 | S, CRABP2, ISG20L2, C1orf66, MRPL24, HDGF, AL833,   | Inf         | 1 | 0.02 | 0.00 |
| 1q#12134_12147    | 1  | 158296040-158361069 | 65030  | FCGR2A, CR624955, HSPA6, FCGR3A                     | 0.692294348 | 1 | 0.02 | 0.02 |
| 1q#13186_13212    | 1  | 170188979-170467117 | 278139 | PRDX6, SLC9A11, ANKRD45, KLHL20                     | 1.398928118 | 1 | 0.03 | 0.02 |
| 1q#13216_13242    | 1  | 170504248-170747909 | 243662 | RS2, AK025846, ZBTB37, AK057310, SERPINC1, AF13     | 1.398928118 | 1 | 0.03 | 0.02 |
| 1q#15373_15374    | 1  | 199065829-199078547 | 12719  | PPP1R12B                                            | 1.398928118 | 1 | 0.03 | 0.02 |
| 1q#10584_10586    | 1  | 146473741-146512493 | 38753  | X14355                                              | Inf         | 1 | 0.02 | 0.00 |
| 1q#12198_12288    | 1  | 158758691-159682044 | 923354 | SH2D1B, UHMK1, AL137257, UAP1, DDR2, BX537651,      | Inf         | 1 | 0.02 | 0.00 |
| 1q#12127_12131    | 1  | 158265365-158283883 | 18519  |                                                     | Inf         | 1 | 0.02 | 0.00 |
| 1q#12175_12184    | 1  | 158536985-158613821 | 76837  | ATF6                                                | Inf         | 1 | 0.02 | 0.00 |
| 1q#11634_11658    | 1  | 154305018-154510191 | 205174 | FCRL5, FCRL4, FCRL3                                 | Inf         | 1 | 0.02 | 0.00 |
| 1q#12120_12126    | 1  | 158179915-158255612 | 75698  |                                                     | Inf         | 1 | 0.02 | 0.00 |
| 1q#10695_10702    | 1  | 147389938-147434384 | 44447  | AK057901, ENSA, GOLPH3L                             | Inf         | 1 | 0.02 | 0.00 |
| 1q#10769_10834    | 1  | 147914814-148351691 | 436878 | VPS72, PIP5K1A, PSMD4, BC021024, ZNF687, PIK4CE     | Inf         | 1 | 0.02 | 0.00 |
| 1q#10850_10852    | 1  | 148491343-148497930 | 6588   | TNRC4                                               | Inf         | 1 | 0.02 | 0.00 |
| 1q#10885_10896    | 1  | 148696302-148803005 | 106704 | S100A10, AK125884                                   | Inf         | 1 | 0.02 | 0.00 |



|                   |    |                     |         |                                                    |             |   |      |      |
|-------------------|----|---------------------|---------|----------------------------------------------------|-------------|---|------|------|
| 1q#10999_11054    | 1  | 149579637-149941414 | 361778  | L, BC042056, SPRR4, SPRR1A, SPRR3, SPRR1B, SPR     | Inf         | 1 | 0.02 | 0.00 |
| 1q#11088_11098    | 1  | 150181314-150254394 | 73081   | S100A7L1, S100A7                                   | Inf         | 1 | 0.02 | 0.00 |
| 1q#14990_15041    | 1  | 194477521-195255068 | 777548  | C1orf53, LHX9, CR614163, NEK7, Y00062, ATP6V1G3    | 0.686886232 | 1 | 0.03 | 0.05 |
| 1q#15099_15108    | 1  | 196017788-196213747 | 195960  | AK125573                                           | 0.686886232 | 1 | 0.03 | 0.05 |
| 1q#15304_15328    | 1  | 198522687-198702513 | 179827  | K074740, AK055940, TMEM58, LMOD1, AF017307, TIM    | 0.686886232 | 1 | 0.03 | 0.05 |
| 20p#212493_212507 | 20 | 69521-138124        | 68604   | DEFB126, DEFB127                                   | 0           | 1 | 0.00 | 0.00 |
| 20p#212765_212835 | 20 | 2462613-2974088     | 511476  | DH3B, AB037863, CPXM, C20orf141, AK126033, FAM17   | 0           | 1 | 0.00 | 0.00 |
| 20p#212863_212867 | 20 | 3136670-3160736     | 24067   | ITPA, SLC4A11                                      | 0           | 1 | 0.00 | 0.00 |
| 20p#213056_213089 | 20 | 4803281-5060148     | 256868  | SLC23A2, C20orf30, PCNA, CDS2                      | 0           | 1 | 0.00 | 0.00 |
| 20p#212896_212972 | 20 | 3439552-3957484     | 517933  | 27, C20orf28, CENPB, CDC25B, C20orf29, VISA, AB097 | 0           | 1 | 0.00 | 0.00 |
| 20p#212973_212978 | 20 | 3966679-4023385     | 56707   |                                                    | Inf         | 1 | 0.02 | 0.00 |
| 20p#212979_213052 | 20 | 4034990-4761038     | 726049  | C027448, SMOX, ADRA1D, PRNP, PRND, PRNT, RASS,     | 0           | 1 | 0.00 | 0.00 |
| 5p#69008_69009    | 5  | 21979223-21991730   | 12508   | CDH12                                              | 0           | 1 | 0.00 | 0.00 |
| 20p#214719_214722 | 20 | 25611616-25651972   | 40357   | ZNF337                                             | 0           | 1 | 0.00 | 0.00 |
| 3q#53407_53476    | 3  | 193835108-194670363 | 835256  | FGF12, C3orf59, HRASLS, ATP13A5, ATP13A4           | 0           | 1 | 0.00 | 0.00 |
| 11q#144847_144853 | 11 | 65956865-65990484   | 33620   | MRPL11, AK127603                                   | 1.044194198 | 1 | 0.05 | 0.05 |
| 16q#190221_190225 | 16 | 58392569-58479153   | 86585   | CR936694                                           | 0           | 1 | 0.00 | 0.00 |
| 16q#190272_190328 | 16 | 59663590-60530783   | 867194  | CDH8                                               | 0           | 1 | 0.00 | 0.00 |
| 16q#190487_190507 | 16 | 64114330-64837446   | 723117  | BC037902                                           | 0           | 1 | 0.00 | 0.00 |
| 16q#191129_191136 | 16 | 69863736-69930018   | 66283   | FLJ11171                                           | 0           | 1 | 0.00 | 0.00 |
| 16q#191537_191553 | 16 | 74227210-74408062   | 180853  | KARS, TERF2IP                                      | 0           | 1 | 0.00 | 0.00 |
| 16q#190329_190420 | 16 | 60541544-63018370   | 2476827 | CDH8, BC043241                                     | 0           | 1 | 0.00 | 0.00 |
| 16q#190448_190486 | 16 | 63603539-64102946   | 499408  | CDH11, AL110259, BC037902                          | 0           | 1 | 0.00 | 0.00 |
| 16q#190508_190532 | 16 | 64901436-65140732   | 239297  | CDH5, AK056683, AK056142, AK130753, TK2            | 0           | 1 | 0.00 | 0.00 |
| 16q#191555_191698 | 16 | 74477438-76565554   | 2088117 | VAP4, AK057218, AK129939, MON1B, AB020679, ADAM    | 0           | 1 | 0.00 | 0.00 |
| 16q#190421_190447 | 16 | 63036395-63592637   | 556243  | CDH11                                              | 0           | 1 | 0.00 | 0.00 |
| 16q#190533_190536 | 16 | 65147751-65161437   | 13687   | CKLF                                               | 0           | 1 | 0.00 | 0.00 |
| 16q#191707_191752 | 16 | 76630181-77029529   | 399349  | BC050287, WWOX                                     | 0           | 1 | 0.00 | 0.00 |
| 16q#191807_191874 | 16 | 77528165-78677348   | 1149184 | WWOX, AF447709, MAF                                | 0           | 1 | 0.00 | 0.00 |
| 16q#190690_190712 | 16 | 66141212-66284676   | 143465  | CTCF, RLTPR, ACD, PARD6A, C16orf48, GFOD2          | 0           | 1 | 0.00 | 0.00 |
| 16q#190780_190786 | 16 | 66723762-66774644   | 50883   | NFATC3                                             | 0           | 1 | 0.00 | 0.00 |
| 16q#191491_191515 | 16 | 73911267-74088953   | 177687  | CFDP1, BX648429, LOC124491, CHST6                  | 0           | 1 | 0.00 | 0.00 |
| 16q#191522_191536 | 16 | 74141966-74222671   | 80706   | 016401, GABARAPL2, BX648197, ADAT1, CR604139, K    | 0           | 1 | 0.00 | 0.00 |
| 16q#190713_190746 | 16 | 66296521-66503597   | 207077  | P10, TSNAXIP1, C16orf56, AK056097, THAP11, NUTF2,  | 0           | 1 | 0.00 | 0.00 |
| 16q#190757_190779 | 16 | 66556716-66713693   | 156978  | SLC12A4, DPEP3, DPEP2, DDX28, DUS2L, NFATC3        | 0           | 1 | 0.00 | 0.00 |
| 16q#190862_190903 | 16 | 67471974-67792445   | 320472  | AB051533, FLJ12331, HAS3, CTF8, CIRH1A, SNTB2      | 0           | 1 | 0.00 | 0.00 |
| 16q#190922_190949 | 16 | 67940622-68204967   | 264346  | TMED6, TERF2, CYB5B, NFAT5                         | 0           | 1 | 0.00 | 0.00 |
| 6q#88759_88764    | 6  | 101520023-101714510 | 194488  |                                                    | 0           | 1 | 0.00 | 0.00 |
| 16q#190537_190584 | 16 | 65165548-65503983   | 338436  | CMTM3, CMTM4, DYNC1L12, AK093213, APPBP1, CA7      | 0           | 1 | 0.00 | 0.00 |
| 16q#190611_190615 | 16 | 65692096-65717456   | 25361   | CBFB, AF249898, C16orf70                           | 0           | 1 | 0.00 | 0.00 |
| 16q#190626_190628 | 16 | 65763006-65770320   | 7315    | AF249898, NOL3, LOC283849                          | 0           | 1 | 0.00 | 0.00 |
| 16q#190635_190689 | 16 | 65804365-66137099   | 332735  | C9A5, AF249898, PLEKHG4, LRRC36, ZDHC1, HSD11      | 0           | 1 | 0.00 | 0.00 |
| 16q#190787_190823 | 16 | 66783194-67107679   | 324486  | C3, RBM35B, LYPLA3, SLC7A6, SLC7A6OS, PRMT7, S     | 0           | 1 | 0.00 | 0.00 |
| 6q#88693_88712    | 6  | 100576299-101016738 | 440440  | SIM1                                               | 0           | 1 | 0.00 | 0.00 |
| 16q#190904_190921 | 16 | 67803423-67934303   | 130881  | SNTB2, BC035134, VPS4A, COG8, NIP7                 | 0           | 1 | 0.00 | 0.00 |
| 6q#88390_88406    | 6  | 95699269-96269446   | 570178  | MANEA                                              | 0           | 1 | 0.00 | 0.00 |
| 16q#190629_190634 | 16 | 65774437-65799656   | 25220   | LOC283849, E2F4, ELMO3, LRRC29                     | 0           | 1 | 0.00 | 0.00 |
| 18p#201087_201161 | 18 | 5006264-5911659     | 905396  | 2726, ZFP161, BC057282, EPB41L3, BC008377, AF301,  | 0           | 1 | 0.00 | 0.00 |
| 9q#123588_123589  | 9  | 92844559-92860020   | 15462   | FGD3                                               | 0           | 1 | 0.00 | 0.00 |
| 16q#190585_190610 | 16 | 65509766-65680999   | 171234  | DH16, RRAD, FAM96B, CES2, FLJ21736, FLJ37464, CB,  | 0           | 1 | 0.00 | 0.00 |
| 16q#190616_190617 | 16 | 65726391-65731988   | 5598    | C16orf70                                           | 0           | 1 | 0.00 | 0.00 |
| 16q#190619_190622 | 16 | 65739934-65749962   | 10029   | MGC4655, TRADD                                     | 0           | 1 | 0.00 | 0.00 |
| 16q#190824_190861 | 16 | 67123982-67461905   | 337924  | BC040871, ZFP90, CDH3, CDH1, BC092500, AB051533    | 0           | 1 | 0.00 | 0.00 |
| 11q#147552_147708 | 11 | 98213465-99975423   | 1761959 | CNTN5                                              | Inf         | 1 | 0.02 | 0.00 |
| 6q#88486_88497    | 6  | 97479298-97584983   | 105686  | KIAA1900                                           | 0           | 1 | 0.00 | 0.00 |

|                   |    |                     |         |                                                   |     |   |      |      |
|-------------------|----|---------------------|---------|---------------------------------------------------|-----|---|------|------|
| 6q#88680_88692    | 6  | 100400517-100563979 | 163463  | MCHR2                                             | 0   | 1 | 0.00 | 0.00 |
| 18p#200627_200639 | 18 | 4316-200044         | 195729  | USP14                                             | 0   | 1 | 0.00 | 0.00 |
| 6q#88370_88375    | 6  | 95106503-95277310   | 170808  |                                                   | 0   | 1 | 0.00 | 0.00 |
| 6q#88407_88485    | 6  | 96320082-97473938   | 1153857 | FUT9, KIAA0776, FHL5, AK055697, GPR63, C6orf66    | 0   | 1 | 0.00 | 0.00 |
| 16q#190623_190624 | 16 | 65753392-65755597   | 2206    | FBXL8                                             | 0   | 1 | 0.00 | 0.00 |
| 16q#190747_190756 | 16 | 66510298-66546713   | 36416   | PSKH1, CTRL, PSMB10, AK126271, LCAT, SLC12A4      | 0   | 1 | 0.00 | 0.00 |
| 11q#147709_147759 | 11 | 100016591-100505944 | 489354  | AK057372, TMEM133, PGR                            | 0   | 1 | 0.00 | 0.00 |
| 9q#123590_123593  | 9  | 92867389-92893026   | 25638   | FGD3                                              | 0   | 1 | 0.00 | 0.00 |
| 6q#88270_88277    | 6  | 92605728-92837055   | 231328  |                                                   | 0   | 1 | 0.00 | 0.00 |
| 6q#88282_88327    | 6  | 92996555-94102702   | 1106148 | EPHA7                                             | 0   | 1 | 0.00 | 0.00 |
| 6q#88364_88366    | 6  | 94905860-94973612   | 67753   |                                                   | 0   | 1 | 0.00 | 0.00 |
| 6q#88498_88509    | 6  | 97596159-97695360   | 99202   | KIAA1900, BC031830                                | 0   | 1 | 0.00 | 0.00 |
| 6q#88675_88679    | 6  | 100201833-100367708 | 165876  |                                                   | 0   | 1 | 0.00 | 0.00 |
| 11q#147535_147551 | 11 | 97814938-98206424   | 391487  |                                                   | Inf | 1 | 0.02 | 0.00 |
| 11q#147913_147929 | 11 | 102235374-102382698 | 147325  | MMP12, MMP13                                      | 0   | 1 | 0.00 | 0.00 |
| 16q#192503_192537 | 16 | 85147185-85572680   | 425496  | AK055241, BC100027                                | 0   | 1 | 0.00 | 0.00 |
| 11q#147760_147792 | 11 | 100515298-101068601 | 553304  | TRPC6, BC039334                                   | 0   | 1 | 0.00 | 0.00 |
| 9q#124696_124782  | 9  | 105673828-107034734 | 1360907 | 99487, BC017988, AK093363, AK023447, ZNF462, AK09 | 0   | 1 | 0.00 | 0.00 |
| 6q#87638_87665    | 6  | 83824225-84020180   | 195956  | C6orf157, DOPEY1, AB029040, PGM3, RWDD2, ME1      | 0   | 1 | 0.00 | 0.00 |
| 9q#124512_124529  | 9  | 103233304-103609315 | 376012  |                                                   | 0   | 1 | 0.00 | 0.00 |
| 6q#88367_88369    | 6  | 94995434-95078818   | 83385   |                                                   | 0   | 1 | 0.00 | 0.00 |
| 11q#147930_147978 | 11 | 102419590-102935089 | 515500  | DCUN1D5, AK125524, AB231766                       | 0   | 1 | 0.00 | 0.00 |
| 11q#147533_147534 | 11 | 97733839-97766171   | 32333   |                                                   | Inf | 1 | 0.02 | 0.00 |
| 16q#192413_192496 | 16 | 84257792-85111606   | 853815  | OX4NB, COX4I1, IRF8, CR627169, BC043214, AL13756  | 0   | 1 | 0.00 | 0.00 |
| 18p#201282_201387 | 18 | 7428812-8517901     | 1089090 | PTPRM                                             | 0   | 1 | 0.00 | 0.00 |
| 9q#124693_124695  | 9  | 105607055-105626404 | 19350   | TMEM38B                                           | 0   | 1 | 0.00 | 0.00 |
| 9q#124783_124816  | 9  | 107053895-107628488 | 574594  | RAD23B, KLF4                                      | 0   | 1 | 0.00 | 0.00 |
| 9q#124922_124938  | 9  | 109157581-109313956 | 156376  | EPB41L4B, PTPN3, BC063287                         | 0   | 1 | 0.00 | 0.00 |
| 9q#125418_125437  | 9  | 113836480-113988614 | 152135  | ZNF618, AMBP, KIF12                               | 0   | 1 | 0.00 | 0.00 |
| 9q#125472_125477  | 9  | 114207289-114250032 | 42744   | AKNA, DFNB31                                      | 0   | 1 | 0.00 | 0.00 |
| 6q#87460_87473    | 6  | 80762168-80883414   | 121247  | TTK, BCKDHB                                       | 0   | 1 | 0.00 | 0.00 |
| 6q#87628_87637    | 6  | 83729138-83810991   | 81854   | C6orf157                                          | 0   | 1 | 0.00 | 0.00 |
| 6q#87740_87755    | 6  | 84809548-84951705   | 142158  | C6orf117, KIAA1009                                | 0   | 1 | 0.00 | 0.00 |
| 17p#192943_192967 | 17 | 444378-621148       | 176771  | VPS53, FAM57A, GEMIN4, C17orf25                   | 0   | 1 | 0.00 | 0.00 |
| 11q#147979_148036 | 11 | 102959643-103988649 | 1029007 | PDGFD                                             | 0   | 1 | 0.00 | 0.00 |
| 18p#201388_201412 | 18 | 8526769-8754921     | 228153  | RAB12, BC050338, AB018345, KIAA0802               | 0   | 1 | 0.00 | 0.00 |
| 11q#146898_146916 | 11 | 88472802-88657981   | 185180  | TYR                                               | 0   | 1 | 0.00 | 0.00 |
| 11q#146930_146960 | 11 | 88808544-89457557   | 649014  | NOX4, AK057189, PSMAL, AB037682                   | 0   | 1 | 0.00 | 0.00 |
| 11q#149660_149685 | 11 | 122986991-123194099 | 207109  | AK127457, AB033027, SCN3B, AF027218, ZNF202       | 0   | 1 | 0.00 | 0.00 |
| 11q#149694_149901 | 11 | 123294750-124879730 | 1584981 | SIG2, ESAM, C11orf61, AK098396, ROBO3, ROBO4, F   | 0   | 1 | 0.00 | 0.00 |
| 6q#87571_87594    | 6  | 82600147-83026888   | 426742  | IBTK                                              | Inf | 1 | 0.02 | 0.00 |
| 9q#125401_125417  | 9  | 113656993-113825012 | 168020  | ZNF618                                            | 0   | 1 | 0.00 | 0.00 |
| 9q#125478_125522  | 9  | 114259458-114734712 | 475255  | DFNB31, ATP6V1G1, C9orf91, TNFSF15                | 0   | 1 | 0.00 | 0.00 |
| 9p#121643_121645  | 9  | 38511130-38526886   | 15757   |                                                   | 0   | 1 | 0.00 | 0.00 |
| 6q#91444_91468    | 6  | 137102625-137294892 | 192268  | MAP3K5, PEX7, SLC35D3                             | 0   | 1 | 0.00 | 0.00 |
| 6q#91731_91732    | 6  | 141396470-141430584 | 34115   |                                                   | 0   | 1 | 0.00 | 0.00 |
| 6q#91740_91757    | 6  | 141688765-142043473 | 354709  | AK097143                                          | 0   | 1 | 0.00 | 0.00 |
| 9q#124939_125061  | 9  | 109320127-110420352 | 1100226 | ALM2, PALM2-AKAP2, C9orf152, TXN, TXNDC8, BX5379  | 0   | 1 | 0.00 | 0.00 |
| 9q#125438_125471  | 9  | 114005199-114197726 | 192528  | COL27A1, AB058773, ORM1, ORM2, AKNA               | 0   | 1 | 0.00 | 0.00 |
| 9p#121646_121648  | 9  | 38526930-38589957   | 63028   | FLJ35740, AB095935                                | 0   | 1 | 0.00 | 0.00 |
| 11q#149645_149659 | 11 | 122799073-122972449 | 173377  | AK127457                                          | 0   | 1 | 0.00 | 0.00 |
| 11q#149686_149693 | 11 | 123220822-123283958 | 63137   | PMP22CD                                           | 0   | 1 | 0.00 | 0.00 |
| 11q#149902_149925 | 11 | 124893389-125104507 | 211119  | E124, STT3A, CHEK1, BC004202, ACRV1               | 0   | 1 | 0.00 | 0.00 |
| 11q#149964_150087 | 11 | 125446929-126879633 | 1432705 | DXRED1, TIRAP, AK094409, DCPS, CR602684, ST3GAL   | 0   | 1 | 0.00 | 0.00 |
| 11q#150096_150115 | 11 | 127232635-127764601 | 531967  |                                                   | 0   | 1 | 0.00 | 0.00 |



|                   |    |                     |         |                                                  |     |   |      |      |
|-------------------|----|---------------------|---------|--------------------------------------------------|-----|---|------|------|
| 1p#3238_3278      | 1  | 33658705-33999138   | 340434  | CSMD2                                            | 0   | 1 | 0.00 | 0.00 |
| 15q#178276_178311 | 15 | 23847648-24457653   | 610006  | AK124933, GABRB3                                 | 0   | 1 | 0.00 | 0.00 |
| 15q#178361_178363 | 15 | 24941620-24953836   | 12217   | GABRG3                                           | 0   | 1 | 0.00 | 0.00 |
| 19p#209009_209018 | 19 | 22490056-22599321   | 109266  | AK126236, CR936832                               | 0   | 1 | 0.00 | 0.00 |
| 4q#66282_66319    | 4  | 174905068-175571615 | 666548  | CR600749, AK125257, FBXO8                        | 0   | 1 | 0.00 | 0.00 |
| 21q#218916_218922 | 21 | 27963614-28108369   | 144756  |                                                  | 0   | 1 | 0.00 | 0.00 |
| 4q#58584_58732    | 4  | 70904027-72217649   | 1313623 | APIN, C4orf7, CSN3, NYD-SP26, SMR3A, SMR3B, PRO  | 0   | 1 | 0.00 | 0.00 |
| 10p#130887_130890 | 10 | 33531230-33556203   | 24974   | NRP1                                             | 0   | 1 | 0.00 | 0.00 |
| 10p#130898_130904 | 10 | 33617566-33679212   | 61647   | NRP1                                             | 0   | 1 | 0.00 | 0.00 |
| 10p#130945_130958 | 10 | 34579905-34686061   | 106157  | PARD3                                            | 0   | 1 | 0.00 | 0.00 |
| 10p#131229_131230 | 10 | 38563575-38585934   | 22360   |                                                  | 0   | 1 | 0.00 | 0.00 |
| 10q#139075_139080 | 10 | 134741155-134790009 | 48855   | GPR123                                           | 0   | 1 | 0.00 | 0.00 |
| 4p#54757_54800    | 4  | 7769904-8115520     | 345617  | SORCS2, BC043614, AFAP, LOC389199, ABLIM2        | 0   | 1 | 0.00 | 0.00 |
| 4q#66320_66390    | 4  | 175583879-176725959 | 1142081 | K094961, AK125844, HPGD, BC036406, GLRA3, AK093  | 0   | 1 | 0.00 | 0.00 |
| 4q#66542_66566    | 4  | 178876197-179246357 | 370161  | AK094945, BC033326                               | 0   | 1 | 0.00 | 0.00 |
| 4q#66576_66596    | 4  | 179514681-180269190 | 754510  |                                                  | 0   | 1 | 0.00 | 0.00 |
| 21q#218908_218915 | 21 | 27768587-27938615   | 170029  |                                                  | 0   | 1 | 0.00 | 0.00 |
| 1p#124_125        | 1  | 1904291-1911004     | 6714    |                                                  | 0   | 1 | 0.00 | 0.00 |
| 12p#153569_153575 | 12 | 31404682-31470564   | 65883   | MGC24039                                         | 0   | 1 | 0.00 | 0.00 |
| 4q#67280_67315    | 4  | 189341572-189703993 | 362422  | FLJ25801, FLJ36180, AY494056                     | 0   | 1 | 0.00 | 0.00 |
| 21q#218126_218131 | 21 | 16605727-16645262   | 39536   | C21orf34                                         | 0   | 1 | 0.00 | 0.00 |
| 21q#218166_218188 | 21 | 16860894-17047504   | 186611  | C21orf34                                         | 0   | 1 | 0.00 | 0.00 |
| 21q#218232_218279 | 21 | 17817111-18341215   | 524105  | XADR, AF336886, BTG3, AY063452, C21orf91, AK0226 | 0   | 1 | 0.00 | 0.00 |
| 21q#218282_218291 | 21 | 18372035-18499234   | 127200  | AK022689                                         | 0   | 1 | 0.00 | 0.00 |
| 21q#218307_218309 | 21 | 18609307-18637785   | 28479   | PRSS7                                            | 0   | 1 | 0.00 | 0.00 |
| 4q#57890_57898    | 4  | 57471239-57527663   | 56425   | SPINK2                                           | 0   | 1 | 0.00 | 0.00 |
| 19q#209351_209380 | 19 | 37170627-37666995   | 496369  | AK097493, ZNF507, BC000922, MGC35440, DPY19L3    | 0   | 1 | 0.00 | 0.00 |
| 19q#209411_209424 | 19 | 38035435-38174433   | 138999  | SLC7A9, FLJ14640, C19orf40, RHPN2                | 0   | 1 | 0.00 | 0.00 |
| 1p#4635_4644      | 1  | 47563897-47613806   | 49910   | FOXE3, FOXD2                                     | 0   | 1 | 0.00 | 0.00 |
| 15q#178110_178120 | 15 | 21740427-22021233   | 280807  |                                                  | 0   | 1 | 0.00 | 0.00 |
| 15q#178133_178150 | 15 | 22374850-22614725   | 239876  | AK058147, C15orf2                                | 0   | 1 | 0.00 | 0.00 |
| 1p#3226_3237      | 1  | 33528636-33649716   | 121081  | AJ242730, ZNF31, CSMD2                           | 0   | 1 | 0.00 | 0.00 |
| 1p#3334_3337      | 1  | 34875631-34906167   | 30537   | BX648912, GJB4                                   | 0   | 1 | 0.00 | 0.00 |
| 1p#4645_4665      | 1  | 47621058-48007485   | 386428  |                                                  | 0   | 1 | 0.00 | 0.00 |
| 15q#178025_178049 | 15 | 20425129-20610514   | 185386  | TUBGCP5, CYFIP1, NIP2, NIP1                      | 0   | 1 | 0.00 | 0.00 |
| 15q#178131_178132 | 15 | 22346355-22364369   | 18015   | AK058147                                         | 0   | 1 | 0.00 | 0.00 |
| 15q#178312_178360 | 15 | 24467898-24931036   | 463139  | GABRB3, CR749803, GABRA5, AK124673, GABRG3       | 0   | 1 | 0.00 | 0.00 |
| 1p#3279_3317      | 1  | 34009464-34394172   | 384709  | CSMD2, AK123355, C1orf94                         | 0   | 1 | 0.00 | 0.00 |
| 10q#139139_139166 | 10 | 135131930-135395607 | 263678  | BC038300, AK160367, CYP2E1, AB209700, SYCE1      | 0   | 1 | 0.00 | 0.00 |
| 2p#20781_20784    | 2  | 20338755-20346520   | 7766    | SDC1                                             | 0   | 1 | 0.00 | 0.00 |
| 4q#57904_57910    | 4  | 57603539-57639770   | 36232   | REST, U22680                                     | 0   | 1 | 0.00 | 0.00 |
| 4q#57920_57924    | 4  | 57701747-57738393   | 36647   | POLR2B, IGFBP7                                   | 0   | 1 | 0.00 | 0.00 |
| 4q#57931_58003    | 4  | 57814772-59965481   | 2150710 | IGFBP7, BC039519, BC034799                       | 0   | 1 | 0.00 | 0.00 |
| 4q#58190_58202    | 4  | 63642272-64076032   | 433761  |                                                  | 0   | 1 | 0.00 | 0.00 |
| 4q#66033_66085    | 4  | 171726433-173150347 | 1423915 | AY956762, BC042565, GALNT17                      | 0   | 1 | 0.00 | 0.00 |
| 4q#66104_66160    | 4  | 173295502-173804286 | 508785  | GALNT17                                          | 0   | 1 | 0.00 | 0.00 |
| 4p#54880_54882    | 4  | 9107707-9234638     | 126932  |                                                  | 0   | 1 | 0.00 | 0.00 |
| 4q#66230_66281    | 4  | 174469609-174895851 | 426243  | 091103, SAP30, SCRG1, BC067829, AF130075, HAND2, | 0   | 1 | 0.00 | 0.00 |
| 19p#208996_209008 | 19 | 22329014-22483137   | 154124  | ZNF676                                           | 0   | 1 | 0.00 | 0.00 |
| 22q#222660_222663 | 22 | 28007664-28023043   | 15380   | EWSR1                                            | 0   | 1 | 0.00 | 0.00 |
| 22q#222679_222683 | 22 | 28145771-28170449   | 24679   | RFPL1                                            | Inf | 1 | 0.02 | 0.00 |
| 1p#113_117        | 1  | 1844929-1869881     | 24953   | GNB1                                             | 0   | 1 | 0.00 | 0.00 |
| 1p#126_136        | 1  | 1919108-2003046     | 83939   | AB051538, AK127388, AK054708, GABRD              | 0   | 1 | 0.00 | 0.00 |
| 1p#3657_3691      | 1  | 38145426-38919064   | 773639  | BC059172, UTP11L                                 | 0   | 1 | 0.00 | 0.00 |
| 4q#66391_66473    | 4  | 176754691-177629037 | 874347  | GPM6A, WDR17, SPATA4, ASB5, SPCS3                | 0   | 1 | 0.00 | 0.00 |

|                   |    |                     |         |                                                  |     |   |      |      |
|-------------------|----|---------------------|---------|--------------------------------------------------|-----|---|------|------|
| 4q#66502_66541    | 4  | 178144791-178865538 | 720748  | NEIL3, AGA, AK094945                             | 0   | 1 | 0.00 | 0.00 |
| 4q#66567_66575    | 4  | 179255668-179469978 | 214311  | BC033326                                         | 0   | 1 | 0.00 | 0.00 |
| 21q#218280_218281 | 21 | 18351870-18361974   | 10105   | AK022689                                         | 0   | 1 | 0.00 | 0.00 |
| 21q#218310_218338 | 21 | 18647832-18985609   | 337778  | PRSS7, BC051441                                  | 0   | 1 | 0.00 | 0.00 |
| 21q#218419_218485 | 21 | 20876593-21524056   | 647464  | AK094858, NCAM2                                  | 0   | 1 | 0.00 | 0.00 |
| 19p#207288_207327 | 19 | 7003997-7463997     | 460001  | 095524, AK127494, X02160, INSR, ARHGEF18, PEX110 | 0   | 1 | 0.00 | 0.00 |
| 1p#3470_3542      | 1  | 36216123-36939628   | 723506  | APPC3, RPRC1, THRAP3, C1orf113, STK40, LSM10, C1 | 0   | 1 | 0.00 | 0.00 |
| 1p#4666_4714      | 1  | 48034431-48666042   | 631612  | AF111848, SLC5A9, BC020660, SPATA6               | 0   | 1 | 0.00 | 0.00 |
| 1p#4716_4753      | 1  | 48731315-49072672   | 341358  | AK094826, AGL4                                   | 0   | 1 | 0.00 | 0.00 |
| 15q#178100_178109 | 15 | 21505552-21724104   | 218553  |                                                  | 0   | 1 | 0.00 | 0.00 |
| 1p#3318_3333      | 1  | 34427924-34868799   | 440876  | BX648912                                         | 0   | 1 | 0.00 | 0.00 |
| 15q#178021_178024 | 15 | 20393586-20418384   | 24799   | TUBGCP5                                          | 0   | 1 | 0.00 | 0.00 |
| 6p#84163_84264    | 6  | 35817576-36661005   | 843430  | 209586, MAPK13, BC042825, BRPF3, PNPLA1, DKFZp7  | 0   | 1 | 0.00 | 0.00 |
| 10p#130905_130944 | 10 | 33691663-34568058   | 876396  | BC042457, AF196785, PARD3                        | 0   | 1 | 0.00 | 0.00 |
| 10p#131094_131137 | 10 | 35898136-36878566   | 980431  | C10orf9, CX40.1, FZD8                            | 0   | 1 | 0.00 | 0.00 |
| 19q#209341_209347 | 19 | 36863686-37067681   | 203996  |                                                  | 0   | 1 | 0.00 | 0.00 |
| 19q#209425_209426 | 19 | 38182485-38192921   | 10437   | RHPN2                                            | 0   | 1 | 0.00 | 0.00 |
| 10q#139081_139086 | 10 | 134799742-134844829 | 45088   | GPR123                                           | 0   | 1 | 0.00 | 0.00 |
| 2p#20778_20780    | 2  | 20323589-20334351   | 10763   | SDC1                                             | 0   | 1 | 0.00 | 0.00 |
| 2q#27242_27243    | 2  | 104568720-104588889 | 20170   | AK126958                                         | 0   | 1 | 0.00 | 0.00 |
| 19p#206564_206587 | 19 | 986349-1155581      | 169233  | VN2, AK024373, ABCA7, HA-1, POLR2E, GPX4, KIAA09 | 0   | 1 | 0.00 | 0.00 |
| 1p#105_112        | 1  | 1768182-1839343     | 71162   | GNB1                                             | 0   | 1 | 0.00 | 0.00 |
| 22q#222629_222659 | 22 | 27786043-28007405   | 221363  | KREMEN1, AK056425, EMID1, RHBDD3, EWSR1          | 0   | 1 | 0.00 | 0.00 |
| 22q#222664_222667 | 22 | 28028105-28039945   | 11841   | GAS2L1, RRP22                                    | 0   | 1 | 0.00 | 0.00 |
| 22q#222684_222710 | 22 | 28173669-28325129   | 151461  | 0652, NEFH, AF203032, AB023200, THOC5, NIPSNAP1  | Inf | 1 | 0.02 | 0.00 |
| 4q#58014_58189    | 4  | 60283937-63589901   | 3305965 | AF307080, FLJ43706, LPHN3                        | 0   | 1 | 0.00 | 0.00 |
| 4q#62354_62389    | 4  | 116091857-116382620 | 290764  | NDST4                                            | 0   | 1 | 0.00 | 0.00 |
| 21q#219638_219666 | 21 | 34215799-34465285   | 249487  | CR626360, FLJ46020, MRPS6                        | 0   | 1 | 0.00 | 0.00 |
| 21q#219797_219834 | 21 | 35601761-36085431   | 483671  | AK123035                                         | 0   | 1 | 0.00 | 0.00 |
| 1p#137_158        | 1  | 2010066-2187782     | 177717  | PRKCZ, C1orf86, AK127994, AK126870               | 0   | 1 | 0.00 | 0.00 |
| 4q#66161_66195    | 4  | 173814860-174109447 | 294588  | GALNT17                                          | 0   | 1 | 0.00 | 0.00 |
| 4q#66213_66229    | 4  | 174278383-174464381 | 185999  | GALNT17, BC040577                                | 0   | 1 | 0.00 | 0.00 |
| 4q#66597_66612    | 4  | 180293013-180787163 | 494151  |                                                  | 0   | 1 | 0.00 | 0.00 |
| 4q#66631_66650    | 4  | 181455363-181892216 | 436854  |                                                  | 0   | 1 | 0.00 | 0.00 |
| 21q#218903_218907 | 21 | 27701619-27749406   | 47788   | BC043580                                         | 0   | 1 | 0.00 | 0.00 |
| 21q#220572_220573 | 21 | 42202439-42210693   | 8255    | C21orf25                                         | 0   | 1 | 0.00 | 0.00 |
| 1p#3692_3738      | 1  | 38942747-39324539   | 381793  | RRAGC, MYCBP, GJA10, RHBDL2, C1orf108, NDUFS     | 0   | 1 | 0.00 | 0.00 |
| 1p#3752_3772      | 1  | 39457339-39666333   | 208995  | MACF1, BMP8A, AK092606                           | 0   | 1 | 0.00 | 0.00 |
| 1p#4468_4483      | 1  | 46002174-46154252   | 152079  | MAST2                                            | 0   | 1 | 0.00 | 0.00 |
| 1p#4496_4590      | 1  | 46293216-47105027   | 811812  | JQCRH, NSUN4, FAAH, DMBX1, AK097731, FLJ32011,   | 0   | 1 | 0.00 | 0.00 |
| 4q#66613_66630    | 4  | 180815864-181380303 | 564440  |                                                  | 0   | 1 | 0.00 | 0.00 |
| 4q#67365_67389    | 4  | 190424364-190833965 | 409602  |                                                  | 0   | 1 | 0.00 | 0.00 |
| 21q#217997_218038 | 21 | 14984653-15537025   | 552373  | AK055805, NRIP1                                  | 0   | 1 | 0.00 | 0.00 |
| 21q#218339_218418 | 21 | 18993605-20849570   | 1855966 | BC051441                                         | 0   | 1 | 0.00 | 0.00 |
| 21q#218486_218493 | 21 | 21529726-21580622   | 50897   | NCAM2                                            | 0   | 1 | 0.00 | 0.00 |
| 21q#220574_220654 | 21 | 42219751-42705036   | 485286  | BC061917, C21orf121, UMODL1, ABCG1, TFF3, TFF2   | 0   | 1 | 0.00 | 0.00 |
| 21q#220670_220707 | 21 | 42802147-43074533   | 272387  | SLC37A1, CR592664, PDE9A                         | 0   | 1 | 0.00 | 0.00 |
| 19p#207243_207252 | 19 | 6554970-6670997     | 116028  | AK026704, TNFSF14, C3                            | 0   | 1 | 0.00 | 0.00 |
| 19p#207328_207332 | 19 | 7469579-7492206     | 22628   | FLJ35784, ZNF358                                 | 0   | 1 | 0.00 | 0.00 |
| 1p#3543_3656      | 1  | 36956634-38142283   | 1185650 | RSPO1, C1orf109, CDCA8, EPHA10, MANEAL, YRDC,    | 0   | 1 | 0.00 | 0.00 |
| 1p#4754_4768      | 1  | 49085388-49243320   | 157933  | AGBL4, AK094826                                  | 0   | 1 | 0.00 | 0.00 |
| 15q#178060_178064 | 15 | 20811896-21219501   | 407606  | AK093104, AF041081                               | 0   | 1 | 0.00 | 0.00 |
| 1p#3338_3374      | 1  | 34914214-35289615   | 375402  | OC113444, AK091069, AF131778, BC042172, ZMYM6,   | 0   | 1 | 0.00 | 0.00 |
| 1p#3424_3457      | 1  | 35764037-36085157   | 321121  | 84, AF297866, CLSPN, EIF2C4, AB046787, AK001622, | 0   | 1 | 0.00 | 0.00 |
| 15q#178069_178099 | 15 | 21258545-21498365   | 239821  | MKRN3, BC070293, MAGEL2, NDN                     | 0   | 1 | 0.00 | 0.00 |

|                   |    |                     |         |                                                     |   |   |      |      |
|-------------------|----|---------------------|---------|-----------------------------------------------------|---|---|------|------|
| 1p#3375_3423      | 1  | 35308870-35756307   | 447438  | SFPQ, ZMYM4, KIAA0319L, NCDN, TFAP2E, AB20947       | 0 | 1 | 0.00 | 0.00 |
| 19p#206528_206563 | 19 | 786616-982276       | 195661  | 2, CFD, THRAP5, C19orf22, KISS1R, ARID3A, WDR18,    | 0 | 1 | 0.00 | 0.00 |
| 10p#131231_131240 | 10 | 38596435-39018864   | 422430  | LOC158160, BC042387                                 | 0 | 1 | 0.00 | 0.00 |
| 1p#159_171        | 1  | 2194298-2307471     | 113174  | SKI, MORN1                                          | 0 | 1 | 0.00 | 0.00 |
| 2p#26389_26391    | 2  | 89445743-89460039   | 14297   | BC073775, AB095273                                  | 0 | 1 | 0.00 | 0.00 |
| 2q#27234_27241    | 2  | 104475949-104558221 | 82273   | AK126958                                            | 0 | 1 | 0.00 | 0.00 |
| 4q#57911_57919    | 4  | 57647982-57693486   | 45505   | C4orf14, POLR2B                                     | 0 | 1 | 0.00 | 0.00 |
| 4q#58203_58338    | 4  | 64104074-66798524   | 2694451 | SRD5A2L2, BC040544, EPHA5, BC017721                 | 0 | 1 | 0.00 | 0.00 |
| 6p#83606_83631    | 6  | 31649450-31747538   | 98089   | JCR3, BC050408, AIF1, BAT2, BAT3, APOM, C6orf47, B, | 0 | 1 | 0.00 | 0.00 |
| 6p#84139_84162    | 6  | 35634903-35811736   | 176834  | FKBP5, BC042605, AK093304                           | 0 | 1 | 0.00 | 0.00 |
| 10p#131090_131093 | 10 | 35858912-35891056   | 32145   | C10orf9                                             | 0 | 1 | 0.00 | 0.00 |
| 2q#333501_33513   | 2  | 190867290-190942982 | 75693   | MGC13057, HIBCH                                     | 0 | 1 | 0.00 | 0.00 |
| 4q#65319_65344    | 4  | 162064206-162719069 | 654864  | FSTL5                                               | 0 | 1 | 0.00 | 0.00 |
| 4q#65577_65620    | 4  | 165918431-166282096 | 363666  | BC062791, AK095255, AK092578, AL833881, TRIM61      | 0 | 1 | 0.00 | 0.00 |
| 4q#65724_65735    | 4  | 167462698-167775745 | 313048  |                                                     | 0 | 1 | 0.00 | 0.00 |
| 4q#65749_65811    | 4  | 167984881-168725523 | 740643  | AF315099, SPOCK3                                    | 0 | 1 | 0.00 | 0.00 |
| 2q#27878_27924    | 2  | 114146068-114974882 | 828815  | SLC35F5, ACTR3, CR601322, DPP10                     | 0 | 1 | 0.00 | 0.00 |
| 4q#62333_62340    | 4  | 115624254-115861373 | 237120  |                                                     | 0 | 1 | 0.00 | 0.00 |
| 4q#62390_62391    | 4  | 116392235-116399572 | 7338    | NDST4                                               | 0 | 1 | 0.00 | 0.00 |
| 21q#219608_219637 | 21 | 33990479-34211195   | 220717  | ITSN1, ATP50                                        | 0 | 1 | 0.00 | 0.00 |
| 19p#207605_207611 | 19 | 9969495-10008215    | 38721   | COL5A3, RDH8                                        | 0 | 1 | 0.00 | 0.00 |
| 21q#220536_220571 | 21 | 41948134-42198101   | 249968  | C21orf129, RIPK4, PRDM15, C21orf25                  | 0 | 1 | 0.00 | 0.00 |
| 21q#217993_217996 | 21 | 14934471-14976434   | 41964   | AK055805                                            | 0 | 1 | 0.00 | 0.00 |
| 19p#207220_207242 | 19 | 6399335-6545172     | 145838  | SLC25A23, CRB3, DENND1C, TUBB4, TNFSF9, TNFSF,      | 0 | 1 | 0.00 | 0.00 |
| 19p#207253_207280 | 19 | 6680080-6899883     | 219804  | TRIP10, SH2D3A, VAV1, EMR1                          | 0 | 1 | 0.00 | 0.00 |
| 10q#134511_134556 | 10 | 84508316-85211382   | 703067  | NRG3, AK056904                                      | 0 | 1 | 0.00 | 0.00 |
| 15q#178065_178068 | 15 | 21236096-21250853   | 14758   | FLJ36144                                            | 0 | 1 | 0.00 | 0.00 |
| 19p#206498_206527 | 19 | 607814-781639       | 173826  | K024373, FSTL3, PRSSL1, PALM, C19orf21, PTBP1, P,   | 0 | 1 | 0.00 | 0.00 |
| 22q#222834_222844 | 22 | 29148174-29203902   | 55729   | MTP18, AK131358, SEC14L3                            | 0 | 1 | 0.00 | 0.00 |
| 22q#223322_223329 | 22 | 33578994-33685089   | 106096  | BX537993                                            | 0 | 1 | 0.00 | 0.00 |
| 22q#223050_223068 | 22 | 30622233-30766225   | 143993  | DEPDC5, AL050256, YWHAH, SLC5A1                     | 0 | 1 | 0.00 | 0.00 |
| 22q#223104_223108 | 22 | 31073968-31097886   | 23919   | RFPL3, BC031635, BC041349                           | 0 | 1 | 0.00 | 0.00 |
| 1p#4851_4865      | 1  | 50260353-50400297   | 139945  | CR95508, ELAVL4                                     | 0 | 1 | 0.00 | 0.00 |
| 1p#4866_4901      | 1  | 50444082-50854673   | 410592  | CR611648, FAF1                                      | 0 | 1 | 0.00 | 0.00 |
| 1p#5269_5281      | 1  | 54296202-54376675   | 80474   | CDCP2, AK122760, LOC606495                          | 0 | 1 | 0.00 | 0.00 |
| 1p#5325_5351      | 1  | 54862563-55067899   | 205337  | C1orf175, TTC4, PARS2, TTC22, C1orf177, DHCR24      | 0 | 1 | 0.00 | 0.00 |
| 1p#5352_5364      | 1  | 55074546-55196521   | 121976  | TMEM61, BSND                                        | 0 | 1 | 0.00 | 0.00 |
| 1p#5365_5389      | 1  | 55208436-55399936   | 191501  | PCSK9, AB028980, AL832370, AK127075                 | 0 | 1 | 0.00 | 0.00 |
| 1p#5390_5476      | 1  | 55409181-56933616   | 1524436 | FLJ45337, PPAP2B, PRKAA2, C1orf168                  | 0 | 1 | 0.00 | 0.00 |
| 2p#19365_19513    | 2  | 20341-1474180       | 1453840 | YL1, BC008374, ACP1, LOC285016, TMEM18, BC04353     | 0 | 1 | 0.00 | 0.00 |
| 2p#19514_19519    | 2  | 1479323-1525513     | 46191   | TPO                                                 | 0 | 1 | 0.00 | 0.00 |
| 2p#19520_19645    | 2  | 1534447-2904981     | 1370535 | BC030834, MYT1L, AK095310                           | 0 | 1 | 0.00 | 0.00 |
| 2p#26273_26283    | 2  | 87287735-87844680   | 556946  | BC033072, MGC4677                                   | 0 | 1 | 0.00 | 0.00 |
| 2q#33514_33565    | 2  | 190951437-191600546 | 649110  | HIBCH, INPP1, AK127176, FLJ20160, NAB1, GLS         | 0 | 1 | 0.00 | 0.00 |
| 4p#54140_54143    | 4  | 1687747-1705067     | 17321   | TMEM129, TACC3                                      | 0 | 1 | 0.00 | 0.00 |
| 4q#65305_65318    | 4  | 161656595-162036515 | 379921  |                                                     | 0 | 1 | 0.00 | 0.00 |
| 4q#65722_65723    | 4  | 167404500-167419523 | 15024   |                                                     | 0 | 1 | 0.00 | 0.00 |
| 4q#65736_65748    | 4  | 167796539-167975822 | 179284  | AF315099                                            | 0 | 1 | 0.00 | 0.00 |
| 4q#67363_67364    | 4  | 190386098-190407580 | 21483   |                                                     | 0 | 1 | 0.00 | 0.00 |
| 4q#67405_67409    | 4  | 191088740-191134399 | 45660   |                                                     | 0 | 1 | 0.00 | 0.00 |
| 4q#67410_67416    | 4  | 191144773-191249665 | 104893  | BC087857, FRG1                                      | 0 | 1 | 0.00 | 0.00 |
| 4q#67417_67422    | 4  | 191250705-191312036 | 61332   | FRG1, TUBB4Q                                        | 0 | 1 | 0.00 | 0.00 |
| 6p#82839_82849    | 6  | 25542601-25609379   | 66779   | LRRC16                                              | 0 | 1 | 0.00 | 0.00 |
| 6p#83767_83769    | 6  | 32586131-32601021   | 14891   | BC003593, HLA-DRB5                                  | 0 | 1 | 0.00 | 0.00 |
| 6p#84529_84535    | 6  | 39078549-39128537   | 49989   | DNAH8, GLP1R                                        | 0 | 1 | 0.00 | 0.00 |

|                   |    |                     |         |                                                    |             |   |      |      |
|-------------------|----|---------------------|---------|----------------------------------------------------|-------------|---|------|------|
| 6p#84536_84551    | 6  | 39135661-39271526   | 135866  | GLP1R, C6orf64, KCN5                               | 0           | 1 | 0.00 | 0.00 |
| 15q#178018_178019 | 15 | 20335887-20366729   | 30843   |                                                    | 0           | 1 | 0.00 | 0.00 |
| 19p#207281_207285 | 19 | 6909753-6959861     | 50109   | AF489700                                           | 0           | 1 | 0.00 | 0.00 |
| 19p#207510_207539 | 19 | 9057863-9295080     | 237218  | ZNF317, OR7D2, Y10529, AK095463, BC109267          | 0           | 1 | 0.00 | 0.00 |
| 19p#208099_208144 | 19 | 13846320-14274775   | 428456  | _J23447, AK027100, LOC90379, RFX1, RLN3, IL27RA, F | 0           | 1 | 0.00 | 0.00 |
| 19p#208145_208150 | 19 | 14309547-14360145   | 50599   | BC011648, CD97                                     | 0           | 1 | 0.00 | 0.00 |
| 19p#208160_208174 | 19 | 14444753-14543610   | 98858   | PTGER1, GIPC1, DNAJB1, GPSN2, NDUFB7               | 0           | 1 | 0.00 | 0.00 |
| 19p#208175_208177 | 19 | 14552825-14583112   | 30288   | FLJ45910, AL832663                                 | 0           | 1 | 0.00 | 0.00 |
| 21q#217964_217967 | 21 | 14663087-14680235   | 17149   | STCH                                               | 0           | 1 | 0.00 | 0.00 |
| 21q#217968_217969 | 21 | 14683497-14688013   | 4517    |                                                    | 0           | 1 | 0.00 | 0.00 |
| 21q#217970_217992 | 21 | 14698043-14923322   | 225280  | AK055805, SAMS1                                    | 0           | 1 | 0.00 | 0.00 |
| 21q#218494_218531 | 21 | 21586387-21872498   | 286112  | NCAM2, U75330                                      | 0           | 1 | 0.00 | 0.00 |
| 21q#218532_218568 | 21 | 21899489-22429983   | 530495  | BC009878, BC035642, BC039377, AY077696             | 0           | 1 | 0.00 | 0.00 |
| 21q#218569_218578 | 21 | 22438137-22607505   | 169369  |                                                    | 0           | 1 | 0.00 | 0.00 |
| 21q#220655_220669 | 21 | 42714819-42796951   | 82133   | UBASH3A, TSGA2, SLC37A1                            | 0           | 1 | 0.00 | 0.00 |
| 5p#67735_67766    | 5  | 3312144-3694587     | 382444  | BC035019, IRX1, AK022063                           | 0           | 1 | 0.00 | 0.00 |
| 20p#214653_214658 | 20 | 24975733-25011769   | 36037   | ACSS1, VSX1                                        | 0           | 1 | 0.00 | 0.00 |
| 5p#67806_67896    | 5  | 4270030-5553081     | 1283052 | 790, BC042977, ADAMTS16, AK127746, AK126937, AB    | 0           | 1 | 0.00 | 0.00 |
| 14q#177802_177804 | 14 | 105118885-105138838 | 19954   | S55096                                             | 0           | 1 | 0.00 | 0.00 |
| 14q#177805_177810 | 14 | 105143707-105184469 | 40763   | S55096                                             | Inf         | 1 | 0.02 | 0.00 |
| 5p#67767_67774    | 5  | 3705469-3804533     | 99065   |                                                    | 0           | 1 | 0.00 | 0.00 |
| 20p#214659_214660 | 20 | 25018067-25032411   | 14345   |                                                    | 0           | 1 | 0.00 | 0.00 |
| 5p#67717_67734    | 5  | 3030545-3292580     | 262036  |                                                    | 0           | 1 | 0.00 | 0.00 |
| 5p#67714_67716    | 5  | 2981945-3019046     | 37102   |                                                    | 0           | 1 | 0.00 | 0.00 |
| 5p#68808_68912    | 5  | 18451320-20226872   | 1775553 | CDH18, BC031051, AK022129                          | 0           | 1 | 0.00 | 0.00 |
| 5p#68956_69006    | 5  | 21158706-21957439   | 798734  | AK095656, BC038535, CDH12                          | 0           | 1 | 0.00 | 0.00 |
| 5p#69029_69067    | 5  | 22206470-22560546   | 354077  | CDH12                                              | 0           | 1 | 0.00 | 0.00 |
| 5p#69104_69118    | 5  | 22918502-23193806   | 275305  | AF315093                                           | 0           | 1 | 0.00 | 0.00 |
| 5p#69316_69351    | 5  | 27665646-28873182   | 1207537 |                                                    | Inf         | 1 | 0.02 | 0.00 |
| 5p#67775_67787    | 5  | 3813864-3986187     | 172324  |                                                    | 0           | 1 | 0.00 | 0.00 |
| 20p#214661_214670 | 20 | 25049716-25171821   | 122106  | AK095800, AK092658, ENTPD6, AK125433, AK123827     | 0           | 1 | 0.00 | 0.00 |
| 5p#69222_69227    | 5  | 25121995-25231867   | 109873  |                                                    | 0.692294348 | 1 | 0.02 | 0.02 |
| 20p#214636_214651 | 20 | 24755963-24958762   | 202800  | CST7, C20orf3, ACSS1                               | 0           | 1 | 0.00 | 0.00 |
| 20p#214671_214718 | 20 | 25177721-25603779   | 426059  | 5B, ABHD12, GINS1, KIAA0980, NANP, BC034569, ZNF   | 0           | 1 | 0.00 | 0.00 |
| 5p#68954_68955    | 5  | 21104187-21132192   | 28006   |                                                    | 0           | 1 | 0.00 | 0.00 |
| 5p#69352_69379    | 5  | 28897041-29521748   | 624708  | BC034574, AL137617, AK0988570                      | 0           | 1 | 0.00 | 0.00 |
| 16p#189094_189095 | 16 | 34339543-34369069   | 29527   |                                                    | 1.398928118 | 1 | 0.03 | 0.02 |
| 9p#120514_120526  | 9  | 24603645-25081784   | 478140  |                                                    | Inf         | 1 | 0.02 | 0.00 |
| 9p#120489_120500  | 9  | 23857943-24160725   | 302783  |                                                    | 0           | 1 | 0.00 | 0.00 |
| 9p#119734_119827  | 9  | 14832243-15784980   | 952738  | K127963, AK093996, C9orf52, SNAPC3, BC036031, PSIA | 0           | 1 | 0.00 | 0.00 |
| 9p#120634_120670  | 9  | 27111885-27405871   | 293987  | TEK, AF418573, C9orf11, MOBKL2B                    | 0           | 1 | 0.00 | 0.00 |
| 9p#120694_120727  | 9  | 27590659-28078471   | 487813  | CR613587, BX538226, LRRN6C                         | Inf         | 1 | 0.02 | 0.00 |
| 9p#120755_120822  | 9  | 28347447-29210056   | 862610  | LRRN6C                                             | Inf         | 1 | 0.02 | 0.00 |
| 9p#120837_120843  | 9  | 29778581-29972979   | 194399  |                                                    | Inf         | 1 | 0.02 | 0.00 |
| 9p#120844_120853  | 9  | 29996104-30311467   | 315364  |                                                    | 0           | 1 | 0.00 | 0.00 |
| 9p#120572_120590  | 9  | 26195023-26590503   | 395481  |                                                    | 0           | 1 | 0.00 | 0.00 |
| 9p#120595_120633  | 9  | 26790767-27100223   | 309457  | C9orf82, PLAA, IFT74, CR617782, TEK                | 0           | 1 | 0.00 | 0.00 |
| 9p#118583_118620  | 9  | 360184-675140       | 314957  | DOCK8, BC037495, ANKRD15                           | 0           | 1 | 0.00 | 0.00 |
| 9p#120591_120594  | 9  | 26613334-26736962   | 123629  |                                                    | 0           | 1 | 0.00 | 0.00 |
| 9p#118621_118647  | 9  | 681104-934345       | 253242  | ANKRD15, AK126531, DMRT1                           | 0           | 1 | 0.00 | 0.00 |
| 9p#119158_119267  | 9  | 6156682-7319513     | 1162832 | BC047085, C9orf26, TPD52L3, UHRF2, GLDC, JMJD2C    | 0           | 1 | 0.00 | 0.00 |
| 9p#121154_121237  | 9  | 34314141-34980815   | 666675  | ARID3C, OPRS1, GALT, AK094689, IL11RA, CCL27, B    | Inf         | 1 | 0.02 | 0.00 |
| 11p#139854_139857 | 11 | 5683674-5705743     | 22070   | TRIM22, BC020770                                   | 0           | 1 | 0.00 | 0.00 |
| 9p#118784_118817  | 9  | 2580562-2838572     | 258011  | AK092343, VLDLR, KCNV2, KIAA0020, AL832239         | 0           | 1 | 0.00 | 0.00 |
| 11p#139559_139561 | 11 | 3204475-3270486     | 66012   |                                                    | 0           | 1 | 0.00 | 0.00 |

|                   |    |                   |         |                                                    |             |   |      |      |
|-------------------|----|-------------------|---------|----------------------------------------------------|-------------|---|------|------|
| 11p#139858_139964 | 11 | 5714298-6434936   | 720639  | 4, OR52E5, CR591899, C11orf42, AB051546, C11orf56, | 0           | 1 | 0.00 | 0.00 |
| 11p#140026_140090 | 11 | 6822839-7438983   | 616145  | JF215, BC014538, ZNF214, NALP14, HNRNPG-T, BC02    | 0           | 1 | 0.00 | 0.00 |
| 9p#118818_118926  | 9  | 2844940-4008082   | 1163143 | 456, AK127804, RFX3, AK126819, AK128171, BC047388  | 0           | 1 | 0.00 | 0.00 |
| 10q#133173_133178 | 10 | 70167626-70209689 | 42064   | CCAR1                                              | 0           | 1 | 0.00 | 0.00 |
| 11p#139965_140025 | 11 | 6444038-6813547   | 369510  | 47806, DNHD1, AB007869, KIAA0409, ILK, TAF10, TPP  | 0           | 1 | 0.00 | 0.00 |
| 3p#45063_45098    | 3  | 83439883-84485452 | 1045570 |                                                    | 0.692294348 | 1 | 0.02 | 0.02 |
| 11p#142671_142693 | 11 | 41050909-41342097 | 291189  | DQ084202                                           | 0.692294348 | 1 | 0.02 | 0.02 |
| 3p#43781_43825    | 3  | 63834321-64293780 | 459460  | ATXN7, AK023371, PSMD6, AL832189, PRICKLE2         | 0           | 1 | 0.00 | 0.00 |
| 3p#43740_43780    | 3  | 63367537-63825481 | 457945  | R936762, SYNPR, AK126350, BC015210, THOC7, ATX1    | 0           | 1 | 0.00 | 0.00 |
| 3p#44285_44303    | 3  | 70549922-70951503 | 401582  | LOC401072                                          | 0           | 1 | 0.00 | 0.00 |
| 11q#143572_143586 | 11 | 56072236-56172698 | 100463  | OR5AP2                                             | 0           | 1 | 0.00 | 0.00 |
| 3p#43250_43253    | 3  | 58145169-58165306 | 20138   | DNASE1L3                                           | 0           | 1 | 0.00 | 0.00 |
| 3p#43553_43699    | 3  | 61493160-62738931 | 1245772 | PTPRG, AK094634, C3orf14, ZNF312, CADPS            | 0           | 1 | 0.00 | 0.00 |
| 3p#45053_45058    | 3  | 83061089-83224932 | 163844  |                                                    | 0           | 1 | 0.00 | 0.00 |
| 3p#45099_45100    | 3  | 84513606-84569312 | 55707   |                                                    | 0.692294348 | 1 | 0.02 | 0.02 |
| 3p#45101_45135    | 3  | 84593123-85176026 | 582904  | BC068246, BC105999                                 | Inf         | 1 | 0.00 | 0.00 |
| 10q#133760_133820 | 10 | 75401465-75929630 | 528166  | BC044908, VCL, AP3M1, ADK                          | 0           | 1 | 0.00 | 0.00 |
| 10q#133821_133885 | 10 | 75938091-76534521 | 596431  | ADK, AK074816, MYST4, AK021415, DUPD1, DUSP13      | Inf         | 1 | 0.02 | 0.00 |
| 3p#43303_43309    | 3  | 58532669-58573676 | 41008   | FAM107A, AK054720                                  | 0           | 1 | 0.00 | 0.00 |
| 3p#43317_43552    | 3  | 58651704-61453378 | 2801675 | FLJ42117, FHIT                                     | 0           | 1 | 0.00 | 0.00 |
| 3p#42596_42617    | 3  | 52210465-52302525 | 92061   | 918, TLR9, PTK9L, BC039681, PPM1M, TMEM113, BX64   | 0           | 1 | 0.00 | 0.00 |
| 3p#43237_43249    | 3  | 58017690-58131698 | 114009  | FLNB                                               | 0           | 1 | 0.00 | 0.00 |
| 9p#121660_121662  | 9  | 39131835-39146954 | 15120   | CNTNAP3                                            | 0           | 1 | 0.00 | 0.00 |
| 3p#45051_45052    | 3  | 82994708-83022010 | 27303   |                                                    | 0           | 1 | 0.00 | 0.00 |
| 15q#179635_179649 | 15 | 38918454-38996513 | 78060   | SPINT1, RHOV, VPS18                                | 0           | 1 | 0.00 | 0.00 |
| 15q#179678_179722 | 15 | 39171459-39507695 | 336237  | 1, EXDL1, CHP, BC051815, OIP5, NUSAP1, NDUFAF1,    | 0           | 1 | 0.00 | 0.00 |
| 10q#131512_131516 | 10 | 46462545-46500109 | 37565   | BC021910                                           | 0           | 1 | 0.00 | 0.00 |
| 3p#44304_44326    | 3  | 70977759-71226828 | 249070  | FOXP1                                              | 0           | 1 | 0.00 | 0.00 |
| 11q#143587_143591 | 11 | 56177679-56208750 | 31072   |                                                    | 0           | 1 | 0.00 | 0.00 |
| 3p#43233_43236    | 3  | 57980497-58010780 | 30284   | FLNB                                               | 0           | 1 | 0.00 | 0.00 |
| 3p#43254_43302    | 3  | 58171419-58527420 | 356002  | ABHD6, RPP14, PKX, PDHB, AK075297, KCTD6, ACOX     | 0           | 1 | 0.00 | 0.00 |
| 11q#143592_143604 | 11 | 56217843-56321384 | 103542  |                                                    | 0           | 1 | 0.00 | 0.00 |
| 3p#42300_42352    | 3  | 49821003-50209019 | 388017  | CAMKV, MST1R, MON1A, RBM6, RBM5, AK125500, S       | 0           | 1 | 0.00 | 0.00 |
| 3p#42399_42426    | 3  | 50443619-50671732 | 228114  | 2D2, C3orf18, HEMK1, CISH, BC068497, MAPKAPK3, A   | 0           | 1 | 0.00 | 0.00 |
| 3p#42527_42595    | 3  | 51696519-52205231 | 508713  | 7F1, RNU3IP2, PARP3, GPR62, PCBP4, ABHD14B, ABH    | 0           | 1 | 0.00 | 0.00 |
| 3p#43310_43316    | 3  | 58581886-58640658 | 58773   | AK054720, FAM3D                                    | 0           | 1 | 0.00 | 0.00 |
| 3p#45136_45157    | 3  | 85186475-85389768 | 203294  | BC105999                                           | Inf         | 1 | 0.02 | 0.00 |
| 19q#210101_210151 | 19 | 44453818-44819201 | 365384  | XL, ZFP36, PLEKHG2, RPS16, SUPT5H, TIMM50, BC0     | 0           | 1 | 0.00 | 0.00 |
| 19q#210176_210230 | 19 | 45039248-45557489 | 518242  | C163131, AK127063, LOC284323, AK131328, MAP3K10    | 0           | 1 | 0.00 | 0.00 |
| 15q#179650_179677 | 15 | 39001835-39165070 | 163236  | DLL4, CHAC1, INOC1                                 | 0           | 1 | 0.00 | 0.00 |
| 1p#7_9            | 1  | 807922-834517     | 26596   | BC042880, AK091100                                 | 0           | 1 | 0.00 | 0.00 |
| 3p#44609_44615    | 3  | 75341359-75445386 | 104028  |                                                    | 0           | 1 | 0.00 | 0.00 |
| 3p#44789_44807    | 3  | 78664923-78878619 | 213697  | ROBO1                                              | 0           | 1 | 0.00 | 0.00 |
| 10q#131517_131521 | 10 | 46506743-46527071 | 20329   | PPYR1, BC021910                                    | 0           | 1 | 0.00 | 0.00 |
| 15q#179628_179634 | 15 | 38891658-38912519 | 20862   | ZFYVE19, PPP1R14D                                  | 0           | 1 | 0.00 | 0.00 |
| 19q#210238_210244 | 19 | 45612990-45643921 | 30932   | SERTAD1, SERTAD3                                   | 0           | 1 | 0.00 | 0.00 |
| 19q#210843_210899 | 19 | 50876198-51306303 | 430106  | R625930, SYMPK, FOXA3, IRF2BP1, LOC339344, NANC    | 0           | 1 | 0.00 | 0.00 |
| 3p#44357_44408    | 3  | 71513628-72057157 | 543530  | FOXPI, EIF4E3, GPR27, PROK2                        | 0           | 1 | 0.00 | 0.00 |
| 10q#131510_131511 | 10 | 46444985-46453450 | 8466    | BC021910                                           | 0           | 1 | 0.00 | 0.00 |
| 3p#42363_42369    | 3  | 50212424-50298642 | 86219   | C38A3, AK096595, GNAI2, BC033528, SEMA3B, C3orf    | 0           | 1 | 0.00 | 0.00 |
| 3p#42378_42398    | 3  | 50330225-50438056 | 107832  | C2, RASSF1, ZMYND10, TUSC4, CYB561D2, TMEM115      | 0           | 1 | 0.00 | 0.00 |
| 3p#42427_42526    | 3  | 50680293-51691190 | 1010898 | K3, ARMET, RBM15B, VPRBP, AK122683, RAD54L2, TE    | 0           | 1 | 0.00 | 0.00 |
| 19q#210681_210688 | 19 | 49613079-49688623 | 75545   | ZNF229, AB209357, ZNF180                           | 0           | 1 | 0.00 | 0.00 |
| 19q#210744_210842 | 19 | 50144300-50870390 | 726091  | KCM, BC020346, KLC3, ERCC2, PPP1R13L, CD3EAF       | 0           | 1 | 0.00 | 0.00 |
| 19q#210900_210979 | 19 | 51311413-52040781 | 729369  | CDC8, FLJ10781, LOC400707, AK094504, CALM3, BX5    | 0           | 1 | 0.00 | 0.00 |



|                   |                     |         |                                                   |     |   |      |      |
|-------------------|---------------------|---------|---------------------------------------------------|-----|---|------|------|
| 3p#42235_42247    | 49353414-49426315   | 72902   | GPX1, RHOA, TCCTA                                 | 0   | 1 | 0.00 | 0.00 |
| 3p#42256_42262    | 49495565-49541226   | 45662   | DAG1                                              | 0   | 1 | 0.00 | 0.00 |
| 3p#42283_42299    | 49715138-49817633   | 102496  | RNF123, GMPPB, IHPK1, LOC389118                   | 0   | 1 | 0.00 | 0.00 |
| 4q#61815_61852    | 109143554-109490351 | 346798  | 452717, MGC26963, AK123292, CYP2U1, HADHSC, LE    | 0   | 1 | 0.00 | 0.00 |
| 15q#180525_180589 | 46941858-47488737   | 546880  | SHC4, KIAA0256, COPS2, GALK2, C15orf33            | 0   | 1 | 0.00 | 0.00 |
| 3p#44616_44618    | 75455078-75479908   | 24831   |                                                   | 0   | 1 | 0.00 | 0.00 |
| 15q#179773_179789 | 39877118-39979072   | 101955  | MAPKBP1, PLA2G4B, SPTBN5, EHD4                    | 0   | 1 | 0.00 | 0.00 |
| 3p#44649_44685    | 76485893-77118327   | 632435  | AJ012503                                          | 0   | 1 | 0.00 | 0.00 |
| 3p#44696_44788    | 77238670-78636522   | 1397853 | ROBO2                                             | 0   | 1 | 0.00 | 0.00 |
| 3p#42370_42377    | 50301542-50326987   | 25446   | IFRD2, HYAL3, HYAL1                               | 0   | 1 | 0.00 | 0.00 |
| 19q#210064_210100 | 44117265-44442597   | 325333  | FBXO17, FBXO27, FLJ16165, PAK4, AB032968          | 0   | 1 | 0.00 | 0.00 |
| 19q#210231_210237 | 45563185-45604426   | 41242   | PLD3, HIPK4, PRX                                  | 0   | 1 | 0.00 | 0.00 |
| 19q#210245_210262 | 45647585-45791469   | 143885  | BLVRB, SPTBN4, SHKBP1, LTBP4                      | 0   | 1 | 0.00 | 0.00 |
| 19q#210689_210708 | 49695413-49900212   | 204800  | CEACAM20, AK123850, PVR, AK098812, CEACAM19, C    | 0   | 1 | 0.00 | 0.00 |
| 3p#42046_42053    | 48032253-48087642   | 55390   | MAP4                                              | 0   | 1 | 0.00 | 0.00 |
| 3p#42248_42255    | 49432015-49488097   | 56083   | AMT, NICN1, DAG1                                  | 0   | 1 | 0.00 | 0.00 |
| 3p#42263_42282    | 49547053-49709629   | 162577  | DAG1, AK096387, BSN, APEH, MST1, RNF123           | 0   | 1 | 0.00 | 0.00 |
| 4q#61853_61858    | 109516126-109611498 | 95373   |                                                   | 0   | 1 | 0.00 | 0.00 |
| 19q#210656_210680 | 49377488-49604230   | 226743  | ZNF227, BC002663, ZNF233, ZNF235, ZNF228, ZNF285  | 0   | 1 | 0.00 | 0.00 |
| 15q#180409_180416 | 45979866-46043158   | 63293   | BC023624                                          | Inf | 1 | 0.02 | 0.00 |
| 15q#180417_180524 | 46051772-46935472   | 883701  | A5, MYEF2, BX537772, SLC12A1, CR749422, DUT, FB   | 0   | 1 | 0.00 | 0.00 |
| 15q#180328_180343 | 44862105-45264851   | 402747  | AB040912                                          | Inf | 1 | 0.02 | 0.00 |
| 15q#180344_180362 | 45274464-45503748   | 229285  | AB040912                                          | 0   | 1 | 0.00 | 0.00 |
| 15q#180363_180408 | 45521438-45969895   | 448458  | AB040912, SEMA6D, BC023624                        | Inf | 1 | 0.02 | 0.00 |
| 3p#44622_44623    | 75653844-75782209   | 128366  |                                                   | 0   | 1 | 0.00 | 0.00 |
| 3p#44634_44648    | 76019295-76300735   | 281441  | AJ012503                                          | 0   | 1 | 0.00 | 0.00 |
| 19p#207134_207144 | 5725315-5768726     | 43412   | TMEM146, MGC24975, DUS3L, FUT6                    | 0   | 1 | 0.00 | 0.00 |
| 3p#44625_44630    | 75845446-75914452   | 69007   | AK123776                                          | 0   | 1 | 0.00 | 0.00 |
| 10q#131504_131508 | 46404919-46427629   | 22711   | KIAA0514, AB011086                                | 0   | 1 | 0.00 | 0.00 |
| 11q#144021_144032 | 60005422-60082874   | 77453   | MS4A12, MS4A13                                    | 0   | 1 | 0.00 | 0.00 |
| 19p#207150_207156 | 5811389-5841963     | 30575   | FUT5                                              | 0   | 1 | 0.00 | 0.00 |
| 1p#9248_9257      | 108368769-108457929 | 89161   | SLC25A24, AF211971                                | 0   | 1 | 0.00 | 0.00 |
| 1p#9410_9417      | 109897860-109928073 | 30214   | GSTM4, BT019947, GSTM2                            | 0   | 1 | 0.00 | 0.00 |
| 1p#9597_9622      | 111562606-111723430 | 160825  | CHIA, C1orf88, OVGPI, WDR77, ATP5F1               | 0   | 1 | 0.00 | 0.00 |
| 19p#206869_206894 | 3416190-3591179     | 174990  | RC1, BC013413, FZR1, CR607935, C19orf28, HMG20B,  | 0   | 1 | 0.00 | 0.00 |
| 21p#217881_217884 | 10055549-10075071   | 19523   | BAGE2                                             | 0   | 1 | 0.00 | 0.00 |
| 19q#21119_211124  | 53262899-53315502   | 52604   | PLA2G4C, LIG1                                     | 0   | 1 | 0.00 | 0.00 |
| 19q#210614_210645 | 49079469-49309120   | 229652  | 21, ZNF155, AK090553, ZNF230, AK095196, ZNF222, Z | 0   | 1 | 0.00 | 0.00 |
| 19q#210980_210981 | 52046228-52054728   | 8501    | BX538265                                          | 0   | 1 | 0.00 | 0.00 |
| 11q#144033_144039 | 60112569-60172825   | 60257   | C11orf64                                          | 0   | 1 | 0.00 | 0.00 |
| 11q#144041_144057 | 60199106-60325608   | 126503  | C11orf64, MS4A8B, AB231761, MGC35295, MS4A10      | 0   | 1 | 0.00 | 0.00 |
| 19p#207068_207133 | 4967071-5714298     | 747228  | 209333, PTPRS, ZNRF4, PLAC2, SAFB2, SAFB, HSD11   | 0   | 1 | 0.00 | 0.00 |
| 19p#207145_207149 | 5776458-5801308     | 24851   | FUT6, FUT3                                        | 0   | 1 | 0.00 | 0.00 |
| 1p#9361_9400      | 109579540-109854355 | 274816  | 5, AK131459, SYPL2, ATXN7L2, CYB561D1, GPR61, AB  | 0   | 1 | 0.00 | 0.00 |
| 1p#9408_9409      | 109889976-109894166 | 4191    |                                                   | 0   | 1 | 0.00 | 0.00 |
| 1p#9418_9473      | 109933787-110398954 | 465168  | STM3, EPS8L3, CSF1, M37435, AHCYL1, FAM40A, ALX   | 0   | 1 | 0.00 | 0.00 |
| 1p#9588_9596      | 111484451-111547191 | 62741   | CHI3L2, LOC149620, CHIA                           | 0   | 1 | 0.00 | 0.00 |
| 1p#9623_9684      | 111727992-112243547 | 515556  | 707, M22995, RAP1A, AK094737, AK092074, C1orf183, | 0   | 1 | 0.00 | 0.00 |
| 1p#1229_1234      | 12800742-12853081   | 52340   | PRAMEF2                                           | 0   | 1 | 0.00 | 0.00 |
| 19p#206858_206868 | 3315791-3402076     | 86286   | NFIC                                              | 0   | 1 | 0.00 | 0.00 |
| 19p#206788_206793 | 2725459-2764610     | 39152   | SGTA, THOP1                                       | 0   | 1 | 0.00 | 0.00 |
| 21p#217885_217894 | 10084231-10198180   | 113950  | BAGE2                                             | 0   | 1 | 0.00 | 0.00 |
| 1p#1563_1564      | 16987056-16997329   | 10274   | AK130020, CROCC                                   | 0   | 1 | 0.00 | 0.00 |
| 1p#6309_6316      | 66356925-66409266   | 52342   | PDE4B                                             | 0   | 1 | 0.00 | 0.00 |
| 1p#6317_6337      | 66417146-66675151   | 258006  | PDE4B                                             | 0   | 1 | 0.00 | 0.00 |

|                   |    |                     |         |                                                   |             |   |   |      |      |
|-------------------|----|---------------------|---------|---------------------------------------------------|-------------|---|---|------|------|
| 1p#6338_6342      | 1  | 66686520-66728079   | 41560   | SGIP1                                             |             | 0 | 1 | 0.00 | 0.00 |
| 1p#9268_9288      | 1  | 108796286-108977255 | 180970  | FAM102B, CR622249, C1orf59, PRPF38B, FND C7       |             | 0 | 1 | 0.00 | 0.00 |
| 1p#9289_9360      | 1  | 108987861-109568432 | 580572  | PSM2, CLCC1, WDR47, TAF13, KIAA1324, SARS, CELS   |             | 0 | 1 | 0.00 | 0.00 |
| 1p#9474_9587      | 1  | 110411421-111477564 | 1066144 | 4, HBXIP, PROK1, KCNA10, BC043564, KCNA2, KCNA3   |             | 0 | 1 | 0.00 | 0.00 |
| 6p#83789_83792    | 6  | 32811119-32821143   | 10025   | BC003593, HLA-DQA2                                |             | 0 | 1 | 0.00 | 0.00 |
| 11q#144058_144071 | 11 | 60329724-60398326   | 68603   | CCDC86, GPR44, ZP1                                |             | 0 | 1 | 0.00 | 0.00 |
| 19p#206794_206835 | 19 | 2771355-3075007     | 303653  | ZNF556, X65230, ZNF57, ZNF77, TLE6, TLE2, AES, G  |             | 0 | 1 | 0.00 | 0.00 |
| 19q#210982_211118 | 19 | 52062062-53255585   | 1193524 | 50924, MEIS3, SLC8A2, KPTN, NAPA, ZNF541, BC032   |             | 0 | 1 | 0.00 | 0.00 |
| 19q#211125_211141 | 19 | 53326928-53478318   | 151391  | LIG1, LOC374920, CARD8, AK125548, ZNF174          |             | 0 | 1 | 0.00 | 0.00 |
| 9p#120671_120693  | 9  | 27414822-27576191   | 161370  | MOBK2B, C9orf72                                   |             | 0 | 1 | 0.00 | 0.00 |
| 9p#120823_120836  | 9  | 29245323-29743392   | 498070  |                                                   |             | 0 | 1 | 0.00 | 0.00 |
| 9p#118563_118582  | 9  | 153131-351777       | 198647  | CBWD1, C9orf66, AB191037, DOCK8                   |             | 0 | 1 | 0.00 | 0.00 |
| 5q#72752_72771    | 5  | 77838400-78172078   | 333679  | LHFPL2, CR936660, AK091868, ARSB                  |             | 0 | 1 | 0.00 | 0.00 |
| 11p#142621_142670 | 11 | 40423499-41032234   | 608736  | DQ084202                                          | 0.692294348 |   | 1 | 0.02 | 0.02 |
| 5q#72692_72751    | 5  | 77301218-77832929   | 531712  | AP3B1, SCAMP1, LHFPL2                             |             | 0 | 1 | 0.00 | 0.00 |
| 5q#72772_72865    | 5  | 78188153-79093574   | 905422  | B, DMGDH, BHMT2, BHMT, JMY, HOMER1, PAPD4, CM     |             | 0 | 1 | 0.00 | 0.00 |
| 5q#71099_71111    | 5  | 56822599-56116423   | 293825  |                                                   |             | 0 | 1 | 0.00 | 0.00 |
| 5q#72134_72185    | 5  | 70951984-71639515   | 687532  | MCCC2, CART, MAP1B, MRPS27                        |             | 0 | 1 | 0.00 | 0.00 |
| 5q#72274_72307    | 5  | 72765558-73016634   | 251077  | FOX D1, BTF3, ANKRA2, UTP15, AK094713             |             | 0 | 1 | 0.00 | 0.00 |
| 5q#71829_71917    | 5  | 65480990-66265913   | 784924  | BC017000, SFRS12, FLJ46010, LOC375449             | Inf         |   | 1 | 0.02 | 0.00 |
| 5q#71918_71963    | 5  | 66277013-66773996   | 496984  | LOC375449, BC018692, AK131421, AK057601, CD180    |             | 0 | 1 | 0.00 | 0.00 |
| 5q#72357_72480    | 5  | 73830133-75150412   | 1320280 | 0902, CR936791, GCNT4, AK097510, HMGCR, AK0006    |             | 0 | 1 | 0.00 | 0.00 |
| 5q#72556_72691    | 5  | 76003291-77260574   | 1257284 | F2RL1, S100Z, CRHBP, AGGF1, ZBED3, CR597892, PL   |             | 0 | 1 | 0.00 | 0.00 |
| 3p#42658_42662    | 3  | 52546588-52573094   | 26507   | AK095910, PB1                                     |             | 0 | 1 | 0.00 | 0.00 |
| 5q#71964_71978    | 5  | 66808813-67210813   | 402001  |                                                   |             | 0 | 1 | 0.00 | 0.00 |
| 5q#72047_72093    | 5  | 68497800-68816682   | 318883  | IPH, MRPS36, CDK7, KENAE, AB024691, BC050737, T   |             | 0 | 1 | 0.00 | 0.00 |
| 5q#72186_72273    | 5  | 71645660-72759801   | 1114142 | 02, BC030521, ZNF366, TNPO1, FCHO2, PRP2, MGC73   |             | 0 | 1 | 0.00 | 0.00 |
| 5q#72308_72356    | 5  | 73027060-73809002   | 781943  | AK094713, CR936816, AK025816, AK025470, BC01674   |             | 0 | 1 | 0.00 | 0.00 |
| 3p#43060_43073    | 3  | 56384672-56503707   | 119036  | CAST1                                             |             | 0 | 1 | 0.00 | 0.00 |
| 3p#43075_43125    | 3  | 56551664-57028117   | 476454  | OC66, C3orf63, BX648955, BC070096, ARHGEF3, AF43  |             | 0 | 1 | 0.00 | 0.00 |
| 3p#42618_42657    | 3  | 52308530-52539835   | 231306  | H1, BAP1, PHF7, SEMA3G, TNNC1, NISCH, STAB1, NT   |             | 0 | 1 | 0.00 | 0.00 |
| 3p#42663_42749    | 3  | 52578866-53252070   | 673205  | TIH1, ITIH3, AK090687, ITIH4, MUSTN1, TMEM110, SF |             | 0 | 1 | 0.00 | 0.00 |
| 3p#42758_43059    | 3  | 53320931-56372670   | 3051740 | 2, CACNA1D, CHDH, IL17RB, ACTR8, SELK, CACNA2D    |             | 0 | 1 | 0.00 | 0.00 |
| 5q#71979_71987    | 5  | 67235717-67494199   | 258483  |                                                   |             | 0 | 1 | 0.00 | 0.00 |
| 5q#72029_72046    | 5  | 68358031-68490219   | 132189  | AK128486, SLC30A5                                 |             | 0 | 1 | 0.00 | 0.00 |
| 5q#72094_72096    | 5  | 68827028-68840765   | 13738   | OCLN                                              |             | 0 | 1 | 0.00 | 0.00 |
| 15q#181187_181272 | 15 | 53658389-54493544   | 835156  | 501, AK023283, PRTG, NEDD4, RFXDC2, AK128045, T   |             | 0 | 1 | 0.00 | 0.00 |
| 15q#181301_181302 | 15 | 54767419-54776230   | 8812    | SUHW4                                             |             | 0 | 1 | 0.00 | 0.00 |
| 3p#43126_43232    | 3  | 57034377-57978471   | 944095  | APPL, ASB14, AL832472, DNHD2, U53532, FLJ44290, 4 |             | 0 | 1 | 0.00 | 0.00 |
| 5q#72102_72104    | 5  | 70343857-70422356   | 78500   | BIRC1, X83301                                     |             | 0 | 1 | 0.00 | 0.00 |
| 3p#42750_42757    | 3  | 53263527-53315183   | 51657   | TKT, DCP1A                                        |             | 0 | 1 | 0.00 | 0.00 |
| 3p#42120_42209    | 3  | 48583014-49178156   | 595143  | AK026351, PRKAR2A, SLC25A20, ARIH2, PH-4, WDR6,   |             | 0 | 1 | 0.00 | 0.00 |
| 11p#143090_143105 | 11 | 46738700-46874922   | 136223  | CKAP5, LRP4                                       |             | 0 | 1 | 0.00 | 0.00 |
| 11p#143127_143130 | 11 | 47087935-47115821   | 27887   | C11orf49                                          |             | 0 | 1 | 0.00 | 0.00 |
| 5q#72025_72028    | 5  | 68314209-68350104   | 35896   | AK128486                                          |             | 0 | 1 | 0.00 | 0.00 |
| 5q#71988_71989    | 5  | 67530971-67543916   | 12946   |                                                   |             | 0 | 1 | 0.00 | 0.00 |
| 4q#59472_59475    | 4  | 80267076-80308743   | 41668   | BC036848                                          |             | 0 | 1 | 0.00 | 0.00 |
| 11p#143132_143145 | 11 | 47139054-47217182   | 78129   | C11orf49, ZNF289, PACSIN3, DDB2                   |             | 0 | 1 | 0.00 | 0.00 |
| 11p#143356_143359 | 11 | 49989322-50021727   | 32406   |                                                   |             | 0 | 1 | 0.00 | 0.00 |
| 5q#72100_72101    | 5  | 69741318-69768007   | 26690   | LOC153561                                         |             | 0 | 1 | 0.00 | 0.00 |
| 11p#143352_143355 | 11 | 49927536-49965295   | 37760   |                                                   |             | 0 | 1 | 0.00 | 0.00 |
| 15q#180807_180960 | 15 | 49450806-50679656   | 1228851 | LYSMD2, TMOD2, TMOD3, LEO1, MAPK6, AF086491,      |             | 0 | 1 | 0.00 | 0.00 |
| 3p#42210_42234    | 3  | 49186648-49340280   | 153633  | MGC35097, CCDC36, STGC3, AK130658, C3orf62, USP   |             | 0 | 1 | 0.00 | 0.00 |
| 5q#72011_72024    | 5  | 67961048-68304153   | 343106  | AK128486                                          |             | 0 | 1 | 0.00 | 0.00 |
| 5q#72098_72099    | 5  | 68868713-69274492   | 405780  | OCLN, LOC153561                                   |             | 0 | 1 | 0.00 | 0.00 |

|                   |    |                     |         |                                                  |             |   |      |      |
|-------------------|----|---------------------|---------|--------------------------------------------------|-------------|---|------|------|
| 11p#143106_143120 | 11 | 46880663-47020855   | 140193  | LRP4, BC046346, C11orf49                         | 0           | 1 | 0.00 | 0.00 |
| 3p#41937_42045    | 3  | 47068358-48015162   | 946805  | LHL18, AK130922, BC036224, PTPN23, SCAP, TMEM1   | 0           | 1 | 0.00 | 0.00 |
| 11p#143350_143351 | 11 | 49905029-49916729   | 11701   |                                                  | 0           | 1 | 0.00 | 0.00 |
| 19p#207014_207026 | 19 | 4542598-4641977     | 99380   | TNFAIP8L1, C19orf10, DPP9                        | 0           | 1 | 0.00 | 0.00 |
| 3p#41923_41936    | 3  | 46930807-47059220   | 128414  | CCDC12, AK131104, SETD2                          | 0           | 1 | 0.00 | 0.00 |
| 19q#210646_210654 | 19 | 49316513-49371876   | 55364   | ZNF225, AK096984, ZNF234, ZNF226                 | 0           | 1 | 0.00 | 0.00 |
| 11p#143341_143349 | 11 | 49688842-49891857   | 203016  | AB231735                                         | 0           | 1 | 0.00 | 0.00 |
| 1p#10009_10027    | 1  | 116011739-116245881 | 234143  | CASQ2, NHLH2, BC043254, SLC22A15                 | 0           | 1 | 0.00 | 0.00 |
| 19p#207053_207057 | 19 | 4840689-4857367     | 16679   |                                                  | 0           | 1 | 0.00 | 0.00 |
| 19p#207063_207067 | 19 | 4914700-4960314     | 45615   | JMJD2B                                           | 0           | 1 | 0.00 | 0.00 |
| 1p#9401_9407      | 1  | 109860960-109886706 | 25747   | GNAT2, AMPD2                                     | 0           | 1 | 0.00 | 0.00 |
| 1p#9685_9704      | 1  | 112251671-112694761 | 443091  | BC034233, CTTNBP2NL                              | 0           | 1 | 0.00 | 0.00 |
| 19p#206994_207013 | 19 | 4368983-4533605     | 164623  | CHAF1A, UBXD1, HDGF2, BC033570, LRG1, SEMA6B     | 0           | 1 | 0.00 | 0.00 |
| 1p#1557_1561      | 1  | 16836986-16967249   | 130264  | AK130020                                         | 0           | 1 | 0.00 | 0.00 |
| 3p#41917_41922    | 3  | 46886289-46919299   | 33011   | PTHR1                                            | 0           | 1 | 0.00 | 0.00 |
| 19p#206895_206899 | 19 | 3605156-3652359     | 47204   | PIP5K1C, BC014884                                | 0           | 1 | 0.00 | 0.00 |
| 19p#206900_206903 | 19 | 3665942-3688814     | 22873   | BC014884, TJP3                                   | 0           | 1 | 0.00 | 0.00 |
| 19p#206904_206950 | 19 | 3693030-4062414     | 369385  | C014884, MATK, ATCAY, ITGB1BP3, DAPK3, EEF2, PIA | 0           | 1 | 0.00 | 0.00 |
| 19p#206969_206993 | 19 | 4199456-4354030     | 154575  | MGC23244, FSD1, STAP2, AK125774, FLJ14981, SH3   | 0           | 1 | 0.00 | 0.00 |
| 19p#207027_207052 | 19 | 4649832-4834004     | 184173  | DPP9, C19orf30, TICAM1, BC035331, M6PRBP1        | 0           | 1 | 0.00 | 0.00 |
| 19p#207058_207062 | 19 | 4863575-4899486     | 35912   | UHRF1                                            | 0           | 1 | 0.00 | 0.00 |
| 1q#19340_19364    | 1  | 245275177-245433898 | 158722  | SH3BP5L, ZNF672, ZNF692, PGBD2                   | Inf         | 1 | 0.02 | 0.00 |
| 1q#10370_10371    | 1  | 142409033-142416881 | 7849    | NBPF1                                            | Inf         | 1 | 0.02 | 0.00 |
| 1q#10965_10966    | 1  | 149390893-149395017 | 4125    |                                                  | Inf         | 1 | 0.02 | 0.00 |
| 1q#10962_10964    | 1  | 149369522-149386262 | 16741   |                                                  | Inf         | 1 | 0.02 | 0.00 |
| 1q#15169_15176    | 1  | 197304591-197367171 | 62581   | KIF14, DDX59                                     | 0.692294348 | 1 | 0.02 | 0.02 |
| 1q#15177_15219    | 1  | 197374191-197733774 | 359584  | BC042016, CAMSAP1L1, C1orf106, KIF21B, AK022893  | 0.692294348 | 1 | 0.02 | 0.02 |
| 1q#15230_15245    | 1  | 197839039-197995161 | 156123  | TMEM9, AY359012, BC033185, DKFZp434B1231, PKP1   | 0.692294348 | 1 | 0.02 | 0.02 |
| 1q#15254_15279    | 1  | 198068196-198233260 | 165065  | TNNI1, AK123965, PHLDA3, AK130802, CSRP1, AK097  | 0.692294348 | 1 | 0.02 | 0.02 |
| 1q#15331_15370    | 1  | 198723672-199041762 | 318091  | 29946, GPR37L1, ARL8A, PTPN7, AJ629456, LGR6, UE | 1.398928118 | 1 | 0.03 | 0.02 |
| 1q#15396_15401    | 1  | 199329886-199374633 | 44748   | SYT2                                             | 0.686886232 | 1 | 0.03 | 0.05 |
| 1q#16054_16061    | 1  | 205994580-206117073 | 122494  |                                                  | 1.044194198 | 1 | 0.05 | 0.05 |
| 1q#16159_16183    | 1  | 207040914-207248524 | 207611  | HHAT, KCNH1                                      | 1.044194198 | 1 | 0.05 | 0.05 |
| 1q#16184_16187    | 1  | 207261989-207288896 | 26908   | KCNH1                                            | 0.686886232 | 1 | 0.03 | 0.05 |
| 1q#10388_10390    | 1  | 142570866-142592976 | 22111   | NBPF1                                            | Inf         | 1 | 0.02 | 0.00 |
| 1q#13213_13215    | 1  | 170475037-170492752 | 17716   | KLHL20                                           | 1.398928118 | 1 | 0.03 | 0.02 |
| 1q#10578_10582    | 1  | 145899886-145988881 | 88996   |                                                  | Inf         | 1 | 0.02 | 0.00 |
| 1q#12670_12730    | 1  | 164557285-165085997 | 528713  | 4, IQWD1, AK091271, GPR161, TIPRL, SFT2D2, AK091 | 0.692294348 | 1 | 0.02 | 0.02 |
| 1q#10970_10976    | 1  | 149413396-149453611 | 40216   | LCE2D                                            | Inf         | 1 | 0.02 | 0.00 |
| 1q#11576_11610    | 1  | 153625540-153875285 | 249746  | NTRK1, AK098809, C1orf92, ARHGEF11, FLJ16478     | Inf         | 1 | 0.02 | 0.00 |
| 1q#11624_11633    | 1  | 154007986-154297143 | 289158  | FCRL5                                            | Inf         | 1 | 0.02 | 0.00 |
| 1q#11659_11674    | 1  | 154517644-154635336 | 117693  | FCRL2, FCRL1, CD5L                               | Inf         | 1 | 0.02 | 0.00 |
| 1q#10703_10712    | 1  | 147447380-147511856 | 64477   | GOLPH3L, HORMAD1                                 | Inf         | 1 | 0.02 | 0.00 |
| 1q#10977_10994    | 1  | 149461953-149555912 | 93960   | LCE2C, LCE2B, LCE2A, C1orf45                     | 0.692294348 | 1 | 0.02 | 0.02 |
| 1q#11445_11503    | 1  | 152737484-153133928 | 396445  | 125482, AK056143, LMNA, AY358531, SEMA4A, KIAA0  | Inf         | 1 | 0.02 | 0.00 |
| 1q#11504_11511    | 1  | 153139079-153187144 | 48066   | RHBG, AB007971                                   | Inf         | 1 | 0.02 | 0.00 |
| 1q#11512_11519    | 1  | 153189996-153221408 | 31413   | C1orf61, BC054045                                | Inf         | 1 | 0.02 | 0.00 |
| 1q#11530_11547    | 1  | 153327250-153436293 | 109044  | IQGAP3, APOA1BP, GPATC4, HAPLN2, BCAN            | Inf         | 1 | 0.02 | 0.00 |
| 1q#11567_11575    | 1  | 153565158-153621526 | 56369   | PRCC, SH2D2A, NTRK1                              | Inf         | 1 | 0.02 | 0.00 |
| 9p#120302_120352  | 9  | 21282858-21548413   | 265556  | V00541, KLHL9, IFNA2, IFNA8, AK124391, IFNE1     | Inf         | 1 | 0.02 | 0.00 |
| 16q#189541_189545 | 16 | 50206404-50264608   | 58205   |                                                  | Inf         | 1 | 0.02 | 0.00 |
| 14q#175228_175252 | 14 | 77345042-77578518   | 233477  | ADCK1                                            | 0           | 1 | 0.00 | 0.00 |
| 14q#175645_175661 | 14 | 81377766-81735822   | 358057  |                                                  | 0           | 1 | 0.00 | 0.00 |
| 14q#175793_175851 | 14 | 85263021-86858875   | 1592855 | BC034577                                         | 0           | 1 | 0.00 | 0.00 |
| 9p#120273_120301  | 9  | 21044957-21272035   | 227079  | IFNB1, IFNW1, IFNA14                             | Inf         | 1 | 0.02 | 0.00 |

|                   |    |                     |         |                                                                 |     |   |      |      |
|-------------------|----|---------------------|---------|-----------------------------------------------------------------|-----|---|------|------|
| 16q#189824_189834 | 16 | 54390012-54492253   | 102242  | CES1, BC039073, CES7                                            | 0   | 1 | 0.00 | 0.00 |
| 16q#189321_189339 | 16 | 47162587-47610815   | 448229  | N4BP1                                                           | Inf | 1 | 0.02 | 0.00 |
| 14q#175200_175227 | 14 | 77151100-77339335   | 188236  | SPTLC2, ALKBH1, C14orf156, SNW1, FLJ25976, ADCK                 | 0   | 1 | 0.00 | 0.00 |
| 14q#175253_175274 | 14 | 77590923-77867561   | 276639  | AJ316284                                                        | 0   | 1 | 0.00 | 0.00 |
| 14q#175664_175680 | 14 | 81829948-82280509   | 450562  |                                                                 | 0   | 1 | 0.00 | 0.00 |
| 14q#175736_175747 | 14 | 84003019-84303860   | 300842  |                                                                 | 0   | 1 | 0.00 | 0.00 |
| 14q#175852_175991 | 14 | 86874773-88494955   | 1620183 | 65, BC029479, KCNK10, SPATA7, PTPN21, FLJ11806, C14orf143, TDP1 | 0   | 1 | 0.00 | 0.00 |
| 14q#176085_176100 | 14 | 89461402-89571503   | 110102  | ITPK1                                                           | 0   | 1 | 0.00 | 0.00 |
| 14q#176443_176448 | 14 | 92520185-92549907   | 29723   |                                                                 | 0   | 1 | 0.00 | 0.00 |
| 14q#176798_176903 | 14 | 95645437-97142334   | 1496898 | 311, C14orf103, BC015851, AK055200, CR608981, C14c              | 0   | 1 | 0.00 | 0.00 |
| 14q#175005_175011 | 14 | 75429238-75476759   | 47522   | TTL5                                                            | 0   | 1 | 0.00 | 0.00 |
| 14q#175332_175344 | 14 | 78331247-78432339   | 101093  | NRXN3                                                           | 0   | 1 | 0.00 | 0.00 |
| 14q#176203_176223 | 14 | 90438944-90610733   | 171790  | RPS6KA5                                                         | 0   | 1 | 0.00 | 0.00 |
| 14q#176427_176437 | 14 | 92378173-92473165   | 94993   | CHGA, BC003622                                                  | 0   | 1 | 0.00 | 0.00 |
| 14q#176438_176442 | 14 | 92477385-92513383   | 35999   | ITPK1                                                           | 0   | 1 | 0.00 | 0.00 |
| 14q#176449_176451 | 14 | 92559003-92576239   | 17237   | ITPK1                                                           | 0   | 1 | 0.00 | 0.00 |
| 14q#176452_176797 | 14 | 92581771-95637348   | 3055578 | 1, BX248259, AY220118, SERPINA9, SERPINA12, SERA                | 0   | 1 | 0.00 | 0.00 |
| 13q#167886_167955 | 13 | 94512971-95151189   | 638219  | ABCC4, CLDN10, DZIP1, BC035106, DNAJC3                          | 0   | 1 | 0.00 | 0.00 |
| 13q#167975_168187 | 13 | 95344770-97397656   | 2052887 | 3L2, HS6S13, AY956767, OXGR1, CR749802, MBNL2, F                | 0   | 1 | 0.00 | 0.00 |
| 13q#168188_168200 | 13 | 97403991-97505893   | 101903  | RANBP5                                                          | 0   | 1 | 0.00 | 0.00 |
| 13q#168858_168980 | 13 | 104028912-106710144 | 2681233 | 548, DAOA, AK058053, EFN2, FLJ10154, AK098538, L                | 0   | 1 | 0.00 | 0.00 |
| 13q#169045_169087 | 13 | 107635495-108102404 | 466910  | LIG4, BX648833, ABHD13, TNFSF13B, MYR8                          | 0   | 1 | 0.00 | 0.00 |
| 13q#167956_167974 | 13 | 95164743-95328664   | 163922  | DNAJC3, UGCGL2                                                  | 0   | 1 | 0.00 | 0.00 |
| 13q#168837_168857 | 13 | 103424239-104008080 | 583842  |                                                                 | 0   | 1 | 0.00 | 0.00 |
| 13q#168677_168698 | 13 | 101436266-101594656 | 158391  | FGF14                                                           | 0   | 1 | 0.00 | 0.00 |
| 13q#169142_169153 | 13 | 108558819-108658336 | 99518   | MYR8                                                            | 0   | 1 | 0.00 | 0.00 |
| 12p#152607_152619 | 12 | 19366442-19466565   | 100124  | PLEKHA5, CR599308                                               | 0   | 1 | 0.00 | 0.00 |
| 9p#121686_121693  | 9  | 43948886-45739136   | 1790251 | BC029914, ANKRD20A3                                             | 0   | 1 | 0.00 | 0.00 |
| 13q#168557_168676 | 13 | 100551200-101429025 | 877826  | VGCNL1, ITGBL1, AK075136, AK026784, FGF14                       | 0   | 1 | 0.00 | 0.00 |
| 13q#168699_168716 | 13 | 101600869-101742572 | 141704  | FGF14                                                           | 0   | 1 | 0.00 | 0.00 |
| 13q#168828_168836 | 13 | 103107018-103372008 | 264991  |                                                                 | 0   | 1 | 0.00 | 0.00 |
| 13q#167121_167132 | 13 | 83360640-83618258   | 257619  |                                                                 | 0   | 1 | 0.00 | 0.00 |
| 13q#167226_167324 | 13 | 85723972-87919996   | 2196025 | AF339814, SLITRK5                                               | 0   | 1 | 0.00 | 0.00 |
| 13q#167166_167178 | 13 | 84353485-84687074   | 333590  |                                                                 | 0   | 1 | 0.00 | 0.00 |
| 8p#108128_108134  | 8  | 72562229-7789996    | 533768  | Z71389, BC030211, SPAG11, DEFB4                                 | 0   | 1 | 0.00 | 0.00 |
| 12p#151933_151939 | 12 | 11387995-11444780   | 56786   |                                                                 | 0   | 1 | 0.00 | 0.00 |
| 12p#151963_152173 | 12 | 11823374-13720085   | 1896712 | 19, AK074729, AK096388, CDKN1B, AK127712, APOLL                 | 0   | 1 | 0.00 | 0.00 |
| 13q#167179_167181 | 13 | 84734726-84796638   | 61913   |                                                                 | 0   | 1 | 0.00 | 0.00 |
| 12p#151726_151727 | 12 | 9585156-9613118     | 27963   | BX647938                                                        | 0   | 1 | 0.00 | 0.00 |
| 12p#151920_151932 | 12 | 11112600-11375894   | 263295  | BC071692, K03207, PRB3                                          | 0   | 1 | 0.00 | 0.00 |
| 12p#151940_151962 | 12 | 11466807-11815493   | 348687  | BC041827, ETV6                                                  | 0   | 1 | 0.00 | 0.00 |
| 12p#152174_152213 | 12 | 13729126-14179228   | 450103  | GRIN2B                                                          | 0   | 1 | 0.00 | 0.00 |
| 12p#152328_152405 | 12 | 15309663-16041648   | 731986  | PTPRO, EPS8, STRAP, DERA                                        | 0   | 1 | 0.00 | 0.00 |
| 3p#45512_45521    | 3  | 90296455-90391757   | 95303   | M19503                                                          | Inf | 1 | 0.02 | 0.00 |
| 12p#151629_151659 | 12 | 8586819-8826846     | 240028  | BC004857, AICDA, MFAP5, FAM80B                                  | 0   | 1 | 0.00 | 0.00 |
| 12p#151706_151719 | 12 | 9237912-9412611     | 174700  | PZP, BC047234                                                   | 0   | 1 | 0.00 | 0.00 |
| 12p#151722_151725 | 12 | 9446682-9554208     | 107527  |                                                                 | 0   | 1 | 0.00 | 0.00 |
| 12p#151816_151822 | 12 | 10256580-10296576   | 39997   | GABARAPL1, BC042884                                             | 0   | 1 | 0.00 | 0.00 |
| 12p#151832_151842 | 12 | 10374532-10464077   | 89546   | KLRK1, KLRC4, KLRC3                                             | 0   | 1 | 0.00 | 0.00 |
| 12p#151850_151919 | 12 | 10544406-11077331   | 532926  | TAS2R7, TAS2R8, TAS2R9, TAS2R10, PRR4, BC07169                  | 0   | 1 | 0.00 | 0.00 |
| 12p#152406_152429 | 12 | 16047990-16335143   | 287154  | DERA                                                            | 0   | 1 | 0.00 | 0.00 |
| 11q#143623_143624 | 11 | 5660048-56638833    | 38786   |                                                                 | 0   | 1 | 0.00 | 0.00 |
| 15q#185834_185872 | 15 | 98749413-99061971   | 312559  | LASS3, AK095793, LINS1, ASB7, AK094123                          | Inf | 1 | 0.02 | 0.00 |
| 11q#143615_143622 | 11 | 56479949-56551103   | 71155   |                                                                 | 0   | 1 | 0.00 | 0.00 |
| 11q#143625_143626 | 11 | 56675795-56687722   | 11928   |                                                                 | 0   | 1 | 0.00 | 0.00 |

|                   |    |                     |         |                                                    |             |   |      |      |
|-------------------|----|---------------------|---------|----------------------------------------------------|-------------|---|------|------|
| 11p#141056_141070 | 11 | 17803582-17937775   | 134194  | SERGEF                                             | 0           | 1 | 0.00 | 0.00 |
| 12p#151823_151831 | 12 | 10309827-10369208   | 59382   | BC042884, KLRD1                                    | 0           | 1 | 0.00 | 0.00 |
| 19p#208359_208394 | 19 | 16139991-16457014   | 317024  | B3, FAM32A, AP1M1, KLF2, BC051873, EPS15L1, CAL    | 0           | 1 | 0.00 | 0.00 |
| 12p#151660_151705 | 12 | 8843087-9222900     | 379814  | ML1, AK057908, PHC1, M6PR, KLRG1, C12orf33, A2M, A | 0           | 1 | 0.00 | 0.00 |
| 12p#151720_151721 | 12 | 9423653-9433002     | 9350    | BC047234                                           | 0           | 1 | 0.00 | 0.00 |
| 12p#151843_151849 | 12 | 10465787-10534452   | 68666   | AF461157, KLRC2, KLRC1                             | 0           | 1 | 0.00 | 0.00 |
| 11q#144260_144264 | 11 | 61970155-62002461   | 32307   | AHNAK                                              | 0           | 1 | 0.00 | 0.00 |
| 3p#45492_45498    | 3  | 89979854-90077728   | 97875   | M19503                                             | 0           | 1 | 0.00 | 0.00 |
| 3p#45499_45511    | 3  | 90086651-90284719   | 198069  | M19503                                             | Inf         | 1 | 0.02 | 0.00 |
| 4q#59552_59600    | 4  | 81452537-81890191   | 437655  | PRDM8, FGF5, MGC35043                              | 0           | 1 | 0.00 | 0.00 |
| 4q#59626_59651    | 4  | 82126143-82400742   | 274600  | MGC35043, BMP3, PRKG2                              | 0           | 1 | 0.00 | 0.00 |
| 15q#185628_185653 | 15 | 96986112-97200880   | 214769  | IGF1R                                              | 1.398928118 | 1 | 0.03 | 0.02 |
| 15q#185654_185684 | 15 | 97206559-97447154   | 240596  | IGF1R, BC010607, AK058162                          | 0.692294348 | 1 | 0.02 | 0.02 |
| 15q#185922_185927 | 15 | 99495586-99538763   | 43178   | CHSY1                                              | 1.398928118 | 1 | 0.03 | 0.02 |
| 15q#185983_185988 | 15 | 99979003-100004652  | 25650   | BX641093, TM2D3                                    | 1.398928118 | 1 | 0.03 | 0.02 |
| 19q#210734_210742 | 19 | 50101163-50135017   | 33855   | APOE, AJ249921                                     | 0           | 1 | 0.00 | 0.00 |
| 3p#45252_45305    | 3  | 86170788-87311717   | 1140930 | IGSF4D, BC035252, VGLL3                            | Inf         | 1 | 0.02 | 0.00 |
| 3p#45330_45335    | 3  | 87778003-87917144   | 139142  | TTC23                                              | 0           | 1 | 0.00 | 0.00 |
| 15q#185693_185696 | 15 | 97513715-97534873   | 21159   | OR4F6, AY792621                                    | Inf         | 1 | 0.02 | 0.00 |
| 15q#186006_186017 | 15 | 10015593-100282878  | 127286  | COPE, DDX49, HOMER3                                | 1.398928118 | 1 | 0.03 | 0.02 |
| 19p#208696_208702 | 19 | 18885903-18911347   | 25445   | CALR3, FLJ21742                                    | 0           | 1 | 0.00 | 0.00 |
| 19p#208395_208400 | 19 | 16462491-16489753   | 27263   | AK128099, FFAR2, UNQ467, ZD52F10                   | 0           | 1 | 0.00 | 0.00 |
| 19q#209661_209675 | 19 | 40576707-40691356   | 114650  | 10, UBE2L6, SERPING1, AK096335, YPEL4, HEAB, ZD    | 0           | 1 | 0.00 | 0.00 |
| 11q#143676_143702 | 11 | 57041055-57210176   | 169122  | CHMP2B, POU1F1                                     | 0           | 1 | 0.00 | 0.00 |
| 3p#45306_45325    | 3  | 87336579-87630972   | 294394  | MGC35043                                           | Inf         | 1 | 0.02 | 0.00 |
| 3p#45326_45329    | 3  | 87661897-87756853   | 94957   | PRKG2                                              | 0           | 1 | 0.00 | 0.00 |
| 4q#59601_59625    | 4  | 81901148-82119709   | 218562  | AK000872, BC106083, NR2F2, AK090480                | 0           | 1 | 0.00 | 0.00 |
| 4q#59652_59662    | 4  | 82413501-82540262   | 126762  | BC038379, BC043294                                 | 0           | 1 | 0.00 | 0.00 |
| 15q#185437_185467 | 15 | 94620101-95052948   | 432848  | FLJ39743                                           | 0.692294348 | 1 | 0.02 | 0.02 |
| 15q#185509_185535 | 15 | 95595820-95931105   | 335286  | AL833262, DMN, TTC23                               | 1.398928118 | 1 | 0.03 | 0.02 |
| 15q#185606_185627 | 15 | 96771826-96969371   | 197546  | TM2D3, TARSL2                                      | 0.692294348 | 1 | 0.02 | 0.02 |
| 15q#185685_185692 | 15 | 97458698-97502589   | 43892   | ATP8B4                                             | 1.398928118 | 1 | 0.03 | 0.02 |
| 15q#185989_185990 | 15 | 100009462-100017107 | 7646    | CRTC1, AB014516, COMP, UPF1, GDF1, COPE            | 0           | 1 | 0.00 | 0.00 |
| 15q#180621_180638 | 15 | 47848470-48017332   | 168863  | CDKN2D, AP1M2, AK027519, SLC44A2, ILF3             | 0           | 1 | 0.00 | 0.00 |
| 19p#208677_208695 | 19 | 18739306-18877930   | 138625  | FLJ39501                                           | 0           | 1 | 0.00 | 0.00 |
| 19p#207688_207706 | 19 | 10539158-10661329   | 122172  | 4F11, CR749400, LOC126536, FLJ25328, AK023385, TF  | 0           | 1 | 0.00 | 0.00 |
| 19p#208287_208291 | 19 | 15504923-15559031   | 54109   | HERP, BC068564, SLC35E1, CRSP7, CR615358, C19orf   | 0           | 1 | 0.00 | 0.00 |
| 19p#208318_208358 | 19 | 15790620-16133226   | 342607  | SCGB1A1, AHNAK                                     | 0           | 1 | 0.00 | 0.00 |
| 19p#208401_208414 | 19 | 16501237-16621994   | 120758  | PLXND1, BC025331, TMCC1, TRH, AK124448             | 0           | 1 | 0.00 | 0.00 |
| 11q#144252_144259 | 11 | 61920836-61963626   | 42791   | AF520801                                           | 0           | 1 | 0.00 | 0.00 |
| 3q#48432_48484    | 3  | 130784888-131458071 | 673184  | EPHA3, M19503                                      | 0           | 1 | 0.00 | 0.00 |
| 6p#81672_81688    | 6  | 10289217-10463482   | 174266  | M19503                                             | 0           | 1 | 0.00 | 0.00 |
| 3p#45463_45491    | 3  | 89587513-89971171   | 383659  | M19503, EPHA3                                      | 0           | 1 | 0.00 | 0.00 |
| 3p#45418_45420    | 3  | 89157388-89182055   | 24668   | M19503, EPHA3                                      | 0           | 1 | 0.00 | 0.00 |
| 3p#45422_45435    | 3  | 89215413-89353258   | 137846  | KAP8L, BC014220, AL390184, AK131404, AK122587, AB  | 0           | 1 | 0.00 | 0.00 |
| 19p#208261_208286 | 19 | 15252220-15494140   | 241921  | ATXN1, AK091312, RBM24, CAP2                       | 0           | 1 | 0.00 | 0.00 |
| 6p#82212_82256    | 6  | 16794518-17512375   | 717858  | AK098665                                           | 0           | 1 | 0.00 | 0.00 |
| 6p#82385_82392    | 6  | 18810233-19100401   | 290169  | AK097585, ID4, BC045695                            | 0           | 1 | 0.00 | 0.00 |
| 6p#82393_82446    | 6  | 19126184-20216709   | 1090526 | BC045695, E2F3, CDKAL1                             | 0           | 1 | 0.00 | 0.00 |
| 6p#82447_82508    | 6  | 20226880-20917349   | 690470  | ILVBL, NOTCH3, ABHD9, BRD4                         | 0           | 1 | 0.00 | 0.00 |
| 19p#208242_208260 | 19 | 15091897-15240869   | 148973  | NBPF1, AF379624                                    | 0           | 1 | 0.00 | 0.00 |
| 1q#10393_10395    | 1  | 142628370-142871455 | 243086  | AF379624, HFE2                                     | Inf         | 1 | 0.02 | 0.00 |
| 1q#10396_10400    | 1  | 142877399-142905440 | 28042   | CHD9                                               | Inf         | 1 | 0.02 | 0.00 |
| 16q#189611_189622 | 16 | 51730915-51822920   | 92006   | ZNF423                                             | 0           | 1 | 0.00 | 0.00 |
| 16q#189394_189408 | 16 | 48279692-48408783   | 129092  |                                                    | 0           | 1 | 0.00 | 0.00 |

|                   |    |                     |         |                                                               |             |   |      |      |
|-------------------|----|---------------------|---------|---------------------------------------------------------------|-------------|---|------|------|
| 16q#189719_189740 | 16 | 52725865-53189016   | 463152  | IRX3                                                          | 0           | 1 | 0.00 | 0.00 |
| 16q#189366_189393 | 16 | 48017848-48270308   | 252461  | ZNF423                                                        | 0           | 1 | 0.00 | 0.00 |
| 16q#189409_189414 | 16 | 48418243-48564019   | 145777  | ZNF423                                                        | 0           | 1 | 0.00 | 0.00 |
| 16q#189741_189746 | 16 | 53237084-53381954   | 144871  |                                                               | 0           | 1 | 0.00 | 0.00 |
| 16q#189364_189365 | 16 | 47992698-48000978   | 8281    |                                                               | 0           | 1 | 0.00 | 0.00 |
| 16q#189418_189447 | 16 | 48617760-48850375   | 232616  | C16orf69, HEATR3, PAPD5                                       | Inf         | 1 | 0.02 | 0.00 |
| 16q#189462_189518 | 16 | 48977184-49654322   | 677139  | NKD1, AL161979, AK055837, SLIC1, CARD15, CYLD, AF275804, IRX5 | Inf         | 1 | 0.02 | 0.00 |
| 16q#189747_189757 | 16 | 53413736-53550814   | 137079  |                                                               | 0           | 1 | 0.00 | 0.00 |
| 5q#73712_73728    | 5  | 90822324-91362901   | 540578  |                                                               | 0           | 1 | 0.00 | 0.00 |
| 5q#74327_74345    | 5  | 100377294-100779902 | 402609  | AF315093                                                      | 0           | 1 | 0.00 | 0.00 |
| 5q#73761_73795    | 5  | 92198531-92917819   | 719289  | AK124699                                                      | 0           | 1 | 0.00 | 0.00 |
| 5q#73804_74169    | 5  | 92981284-96747446   | 3766163 | RSK, AK126218, LOC317671, SPATA9, AK023621, RHC               | 0           | 1 | 0.00 | 0.00 |
| 5q#72987_72990    | 5  | 80289900-80314715   | 24816   | RASGRF2                                                       | 0           | 1 | 0.00 | 0.00 |
| 5q#73132_73711    | 5  | 81733285-90798559   | 9065275 | C33214, BC030122, BC043237, BC036480, AK091356, C             | 0           | 1 | 0.00 | 0.00 |
| 5q#73729_73760    | 5  | 91417777-92167159   | 749383  | AK056485                                                      | 0           | 1 | 0.00 | 0.00 |
| 5q#74170_74326    | 5  | 96771193-100362429  | 3591237 | RGMB, CHD1, CR594287, UNQ1912, ST8SIA4, AF31509               | 0           | 1 | 0.00 | 0.00 |
| 5q#74346_74359    | 5  | 100842157-101329781 | 487625  |                                                               | 0           | 1 | 0.00 | 0.00 |
| 5q#72991_73131    | 5  | 80321101-81712826   | 1391726 | CCHC9, ACOT12, AF077048, SSBP2, ATG10, RPS23, A               | 0           | 1 | 0.00 | 0.00 |
| 5q#74360_74362    | 5  | 101357375-101420822 | 63448   |                                                               | 0           | 1 | 0.00 | 0.00 |
| 5q#74394_74656    | 5  | 101852462-107059145 | 5206684 | PAM, FLJ20125, AB007893, HISPPD1, LOC90355, NUD               | 0           | 1 | 0.00 | 0.00 |
| 5q#71520_71567    | 5  | 61209534-61948584   | 739051  | BC047544, KIF2, HSA9761, IPO11                                | 0           | 1 | 0.00 | 0.00 |
| 5q#74363_74393    | 5  | 101451594-101839345 | 387752  | SLCO4C1, SLCO6A1                                              | 0           | 1 | 0.00 | 0.00 |
| 5q#75550_75684    | 5  | 119694454-121939570 | 2245117 | LOC51334, FTMT, SRFBP1, LOX, ZNF474, SNCAIP, A                | 0           | 1 | 0.00 | 0.00 |
| 5q#75754_75770    | 5  | 122709757-122887996 | 178240  | CCDC100, CSNK1G3                                              | 0           | 1 | 0.00 | 0.00 |
| 5q#76663_76678    | 5  | 133965082-134070786 | 105705  | BC012749, SAR1B                                               | 0           | 1 | 0.00 | 0.00 |
| 5q#71568_71578    | 5  | 61958972-62203421   | 244450  | IPO11                                                         | 0           | 1 | 0.00 | 0.00 |
| 5q#71579_71738    | 5  | 62274050-64657025   | 2382976 | RNF180, AL832580, R7BP, P18SRP, SDCCCAG10, AD                 | 0           | 1 | 0.00 | 0.00 |
| 5q#77146_77156    | 5  | 138671882-138732462 | 60581   | MATR3, BX537365, PAIP2                                        | 0           | 1 | 0.00 | 0.00 |
| 5q#77827_77868    | 5  | 145796051-146168593 | 372543  | TCERG1, GPR151, PPP2R2B                                       | 0           | 1 | 0.00 | 0.00 |
| 11p#143252_143269 | 11 | 48084195-48220446   | 136252  | PTPRJ                                                         | 0           | 1 | 0.00 | 0.00 |
| 5q#75441_75549    | 5  | 118116153-119665492 | 1549340 | 6311, DMXL1, AK097884, TNFAIP8, HSD17B4, AB2089               | 0           | 1 | 0.00 | 0.00 |
| 5q#76679_76700    | 5  | 134078207-134223282 | 145076  | BC012749, CAMLG, DDX46, C5orf24                               | 0           | 1 | 0.00 | 0.00 |
| 11p#142504_142509 | 11 | 37132463-37305984   | 173522  |                                                               | 0.692294348 | 1 | 0.02 | 0.02 |
| 11p#141874_141882 | 11 | 29486142-29729208   | 243067  |                                                               | 0           | 1 | 0.00 | 0.00 |
| 11p#142956_142980 | 11 | 45361314-45715198   | 353885  | FLJ41423, CHST1                                               | 0           | 1 | 0.00 | 0.00 |
| 5q#76860_76870    | 5  | 135818317-136169955 | 351639  |                                                               | 0           | 1 | 0.00 | 0.00 |
| 5q#76960_77145    | 5  | 137126862-138665942 | 1539081 | KIF20A, CDC23, GFRA3, CDC25C, FAM53C, JMJD1B,                 | 0           | 1 | 0.00 | 0.00 |
| 11p#142404_142423 | 11 | 35917126-36041428   | 124303  | LDLRAD3                                                       | 0.692294348 | 1 | 0.02 | 0.02 |
| 11p#143270_143273 | 11 | 48228208-48242045   | 13838   | OR4X1                                                         | 0           | 1 | 0.00 | 0.00 |
| 11p#141883_141952 | 11 | 29762617-30698247   | 935631  | KCNA4, FSHB, C11orf46, AB209163, MPPE2                        | 0           | 1 | 0.00 | 0.00 |
| 5q#77157_77158    | 5  | 138735617-138740178 | 4562    | SLC23A1                                                       | 0           | 1 | 0.00 | 0.00 |
| 5q#77642_77826    | 5  | 142801381-145777703 | 2976323 | 644, SH3RF2, AL833297, PLAC8L1, AK095870, LARS, A             | 0           | 1 | 0.00 | 0.00 |
| 11p#142829_142921 | 11 | 43904729-44938837   | 1034109 | LOC390110, PHACS, EXT2, AB058691, ALX4, TP53111               | 0           | 1 | 0.00 | 0.00 |
| 5q#77635_77641    | 5  | 142735903-142792592 | 56690   | NR3C1                                                         | 0           | 1 | 0.00 | 0.00 |
| 3p#40480_40541    | 3  | 30661266-31651615   | 990350  | TGFB2, GADL1, AL832766, STT3B                                 | 0           | 1 | 0.00 | 0.00 |
| 15q#180727_180768 | 15 | 48737274-49085557   | 348284  | TRPM7, SPPL2A, AK091906, AP4E1                                | 0           | 1 | 0.00 | 0.00 |
| 3p#40542_40617    | 3  | 31661129-32419542   | 758414  | OSBPL10, GPD1L, CMTM8, CMTM7                                  | 0           | 1 | 0.00 | 0.00 |
| 14q#176940_176966 | 14 | 98042023-98530987   | 488965  | FLJ25773                                                      | 0           | 1 | 0.00 | 0.00 |
| 14q#173610_173635 | 14 | 63326393-63556573   | 230181  | SYNE2                                                         | 0           | 1 | 0.00 | 0.00 |
| 14q#173603_173609 | 14 | 63235019-63293649   | 58631   | SGPP1                                                         | 0           | 1 | 0.00 | 0.00 |
| 14q#173636_173676 | 14 | 63561355-63868790   | 307436  | SYNE2, ESR2                                                   | 0           | 1 | 0.00 | 0.00 |
| 14q#173691_173695 | 14 | 63999397-64023611   | 24215   | BC014650, AKAP5, ZBTB25                                       | 0           | 1 | 0.00 | 0.00 |
| 14q#173577_173602 | 14 | 63012616-63227778   | 215163  | PPP2R5E, C14orf150, SGPP1                                     | 0           | 1 | 0.00 | 0.00 |
| 11q#146682_146683 | 11 | 85727387-85740948   | 13562   | C11orf73                                                      | 0.692294348 | 1 | 0.02 | 0.02 |
| 12p#152266_152305 | 12 | 14801195-15031549   | 230355  | 2AFJ, WBP11, C12orf60, AK056213, ART4, MGP, C12o              | 0           | 1 | 0.00 | 0.00 |

|                   |    |                     |         |                                                   |             |   |      |      |
|-------------------|----|---------------------|---------|---------------------------------------------------|-------------|---|------|------|
| 11q#146325_146347 | 11 | 82052802-82209914   | 217113  | AK095054, MGC33846, AF438406, PRCP                | Inf         | 1 | 0.02 | 0.00 |
| 11q#146383_146394 | 11 | 82654520-82813626   | 159107  | MDS025, BC070093                                  | 0.686886232 | 1 | 0.03 | 0.05 |
| 12p#152223_152245 | 12 | 14420459-14586515   | 166057  | ATF7IP, FLJ22662                                  | 0           | 1 | 0.00 | 0.00 |
| 12q#155807_155811 | 12 | 55822753-55856988   | 34236   | LRP1                                              | 0           | 1 | 0.00 | 0.00 |
| 14q#170022_170028 | 14 | 21359731-21393778   | 34048   | BC063432, MGC40069                                | 0           | 1 | 0.00 | 0.00 |
| 11q#146348_146352 | 11 | 82288127-82321946   | 33820   | PRCP, FLJ25416                                    | 0.692294348 | 1 | 0.02 | 0.02 |
| 12p#152306_152310 | 12 | 15041656-15135822   | 94167   |                                                   | 0           | 1 | 0.00 | 0.00 |
| 12p#151278_151330 | 12 | 5591521-6065710     | 474190  | TMEM16B, VWF                                      | 0           | 1 | 0.00 | 0.00 |
| 15q#184000_184139 | 15 | 78358253-79582392   | 1224140 | 03, KIAA1199, BC009210, MESDC2, AL109682, C15orf2 | Inf         | 1 | 0.02 | 0.00 |
| 15q#184152_184167 | 15 | 79897016-80169750   | 272735  | AK055989, BC043257                                | Inf         | 1 | 0.02 | 0.00 |
| 15q#184684_184777 | 15 | 86777058-87593346   | 782289  | 793, DET1, AK054749, ISG20L1, AK122793, ISG20, AG | Inf         | 1 | 0.02 | 0.00 |
| 15q#184778_184837 | 15 | 87564090-87988527   | 404438  | MA1794, POLG, CR612213, RHCG, BC039350, AK12361   | 0           | 1 | 0.00 | 0.00 |
| 14q#177787_177792 | 14 | 105024134-105041115 | 16982   | S55096, C14orf80                                  | 0           | 1 | 0.00 | 0.00 |
| 12q#155812_155816 | 12 | 55868332-55900034   | 31703   | LRP1, NXPH4                                       | 0           | 1 | 0.00 | 0.00 |
| 12q#155674_155680 | 12 | 54891677-54923173   | 31497   | RNF41, AY583020, OBFC2B, SLC39A5                  | 0           | 1 | 0.00 | 0.00 |
| 11q#144304_144310 | 11 | 62219327-62252450   | 33124   | BSCL2, GNG3, AK122942, AF289605                   | 0           | 1 | 0.00 | 0.00 |
| 12p#151331_151337 | 12 | 6077467-6131208     | 53742   | VWF                                               | 0           | 1 | 0.00 | 0.00 |
| 15q#181392_181429 | 15 | 55569543-55895577   | 326035  | CGNL1, Gcom1, AK074767                            | 0           | 1 | 0.00 | 0.00 |
| 15q#181430_181432 | 15 | 55919033-55967725   | 48693   |                                                   | Inf         | 1 | 0.02 | 0.00 |
| 15q#184168_184203 | 15 | 80191426-81080617   | 889192  | EFTUD1, DKFZp666G057, CR936602, CPEB1             | 0           | 1 | 0.00 | 0.00 |
| 15q#184313_184358 | 15 | 81999515-82375857   | 376343  | SH3GL3, ADAMTSL3                                  | 0           | 1 | 0.00 | 0.00 |
| 15q#184616_184621 | 15 | 86056493-86209175   | 152683  | AL109696                                          | 0           | 1 | 0.00 | 0.00 |
| 15q#184622_184683 | 15 | 86214945-86748077   | 533133  | NTRK3, AK097486                                   | Inf         | 1 | 0.02 | 0.00 |
| 11q#144297_144303 | 11 | 62180848-62210522   | 29675   | C11orf48, BC090057, LOC51035, LOC221091           | 0           | 1 | 0.00 | 0.00 |
| 3p#45381_45390    | 3  | 88510901-88727864   | 216964  | M19503                                            | 0           | 1 | 0.00 | 0.00 |
| 12q#155817_155822 | 12 | 55903157-55920518   | 17362   | NXPH4, SHMT2, NDUFA4L2                            | 0           | 1 | 0.00 | 0.00 |
| 12p#151235_151277 | 12 | 5019940-5584710     | 564771  | KCNA5, CR611279, X53655, NTF3, TMEM16B            | 0           | 1 | 0.00 | 0.00 |
| 12p#151473_151477 | 12 | 6968183-7010070     | 41888   | OACT5, AK055183                                   | 0           | 1 | 0.00 | 0.00 |
| 12p#151494_151510 | 12 | 7181426-7358336     | 176911  | CLSTN3, PEX5                                      | 0           | 1 | 0.00 | 0.00 |
| 15q#184838_184857 | 15 | 87972150-88072404   | 100255  | C15orf42, KIF7, BC042063, PLIN, PEX11A, LOC56964  | 0           | 1 | 0.00 | 0.00 |
| 15q#184893_184896 | 15 | 88281626-88335707   | 54082   |                                                   | 0           | 1 | 0.00 | 0.00 |
| 12p#151338_151472 | 12 | 6147978-6962887     | 814910  | PR92, ACRBP, ING4, ZNF384, C12orf53, COPS7A, MLF  | 0           | 1 | 0.00 | 0.00 |
| 15q#184239_184312 | 15 | 81382087-81990873   | 608787  | AK090925, C15orf40, BTBD1, TM6SF1, BC063487, HDG  | 0           | 1 | 0.00 | 0.00 |
| 15q#184372_184385 | 15 | 82520515-82907368   | 386854  | AK095617, KIAA1920, FLJ43276                      | 0           | 1 | 0.00 | 0.00 |
| 3p#45377_45380    | 3  | 88411079-88480006   | 68928   |                                                   | 0           | 1 | 0.00 | 0.00 |
| 3p#45391_45402    | 3  | 88750831-88905096   | 154266  | M19503                                            | 0           | 1 | 0.00 | 0.00 |
| 19q#209906_209940 | 19 | 42744320-43130070   | 385751  | FLJ37549, ZNF607, ZNF573, AK055483, BC042630, AK  | 0.692294348 | 1 | 0.02 | 0.02 |
| 12q#155654_155673 | 12 | 54785155-54887875   | 102721  | 41, ZC3H10, AY583020, FAM62A, MYL6B, MYL6, SMAF   | 0           | 1 | 0.00 | 0.00 |
| 12q#155681_155805 | 12 | 54926480-55803159   | 876680  | S2, RBMS2, BAZ2A, ATP5B, PTGES3, NACA, PRIM1, A   | 0           | 1 | 0.00 | 0.00 |
| 12q#155823_155847 | 12 | 55923500-56117429   | 193930  | STAC3, R3HDM2, AB023219, INHBC                    | 0           | 1 | 0.00 | 0.00 |
| 12p#150861_150930 | 12 | 1416482-2023638     | 607157  | 090616, FBXL14, WNT5B, ADIPOR2, CACNA2D4, AK05    | 0           | 1 | 0.00 | 0.00 |
| 12p#151040_151079 | 12 | 2993823-3393633     | 399811  | TEAD4, TSPAN9                                     | 0           | 1 | 0.00 | 0.00 |
| 15q#184858_184892 | 15 | 88077463-88274707   | 197245  | 964, MESP1, AL360139, ANPER, AB209918, AP3S2, C   | 0           | 1 | 0.00 | 0.00 |
| 15q#185097_185134 | 15 | 89895360-90375207   | 479848  | SLCO3A1                                           | Inf         | 1 | 0.02 | 0.00 |
| 15q#185271_185315 | 15 | 91690810-92318920   | 628111  | AK094352, BC037497, BC021741, BC043440            | Inf         | 1 | 0.02 | 0.00 |
| 15q#185487_185503 | 15 | 95306288-95510952   | 204665  |                                                   | 0           | 1 | 0.00 | 0.00 |
| 15q#185545_185550 | 15 | 96071751-96128121   | 56371   | AK025311                                          | 0           | 1 | 0.00 | 0.00 |
| 15q#185569_185576 | 15 | 96320259-96414101   | 93843   |                                                   | 0           | 1 | 0.00 | 0.00 |
| 6p#81692_81700    | 6  | 10502579-10540510   | 37932   | TFAP2A, C6orf218                                  | 0           | 1 | 0.00 | 0.00 |
| 19q#209941_209953 | 19 | 43140503-43253113   | 112611  | SIPA1L3                                           | 0.692294348 | 1 | 0.02 | 0.02 |
| 3p#39932_39937    | 3  | 23023235-23165458   | 142224  |                                                   | 0           | 1 | 0.00 | 0.00 |
| 15q#185028_185042 | 15 | 89275790-89332521   | 56732   | UNC45A, AK128480, RCCD1, PRC1                     | 0           | 1 | 0.00 | 0.00 |
| 15q#185083_185096 | 15 | 89649508-89878126   | 228619  | BC036442                                          | 0           | 1 | 0.00 | 0.00 |
| 3p#39938_39972    | 3  | 23189928-23486947   | 297020  | UBE2E2                                            | 0           | 1 | 0.00 | 0.00 |
| 15q#180691_180695 | 15 | 48427090-48461038   | 33949   | GABPB2, BC035091                                  | 0           | 1 | 0.00 | 0.00 |

|                   |    |                     |         |                                                   |     |   |      |      |
|-------------------|----|---------------------|---------|---------------------------------------------------|-----|---|------|------|
| 3p#39973_40073    | 3  | 23498573-24520259   | 1021687 | E2E2, UBE2E1, NKIRAS1, RPL15, AK027749, NR1D2, T  | 0   | 1 | 0.00 | 0.00 |
| 3p#40083_40298    | 3  | 24798976-28023373   | 3224398 | TOP2B, AL832748, NGLY1, OXSM, LRRC3B, NEK10, A    | 0   | 1 | 0.00 | 0.00 |
| 3p#40391_40401    | 3  | 29442425-29543497   | 101073  | RBMS3                                             | 0   | 1 | 0.00 | 0.00 |
| 15q#185023_185025 | 15 | 89257070-89264084   | 7015    | MAN2A2                                            | 0   | 1 | 0.00 | 0.00 |
| 15q#185551_185568 | 15 | 96148316-96315964   | 167649  | AK025311, BC039335, AK093364, ARRDCA              | 0   | 1 | 0.00 | 0.00 |
| 15q#185577_185599 | 15 | 96430271-96698799   | 268529  |                                                   | 0   | 1 | 0.00 | 0.00 |
| 3p#39723_39765    | 3  | 19280670-19936394   | 655725  | KCNH8, EFHB                                       | 0   | 1 | 0.00 | 0.00 |
| 3p#39766_39780    | 3  | 19943617-20071006   | 127390  | EFHB, AK122616, RAB5A, C3orf48, PCAF              | 0   | 1 | 0.00 | 0.00 |
| 3p#39781_39782    | 3  | 20080974-20088870   | 7897    | PCAF                                              | 0   | 1 | 0.00 | 0.00 |
| 3p#39828_39931    | 3  | 21254283-23010257   | 1755975 | ZNF659                                            | 0   | 1 | 0.00 | 0.00 |
| 3p#40074_40082    | 3  | 24543616-24782115   | 238500  |                                                   | 0   | 1 | 0.00 | 0.00 |
| 15q#185026_185027 | 15 | 89266769-89269223   | 2455    | MAN2A2                                            | 0   | 1 | 0.00 | 0.00 |
| 15q#185043_185082 | 15 | 89336878-89638623   | 301746  | PRC1, VPS33B, CR612485, BC030011, SV2B            | 0   | 1 | 0.00 | 0.00 |
| 19q#211471_211488 | 19 | 55910291-56022970   | 112680  | CLEC11A, BC066878, GPR32, ACPT, MGC13170, KLK     | 0   | 1 | 0.00 | 0.00 |
| 16q#189218_189225 | 16 | 45965768-46054149   | 88382   | ITFG1, PHKB                                       | Inf | 1 | 0.02 | 0.00 |
| 15q#183031_183043 | 15 | 70227125-70312500   | 85376   | GRAMD2, PKM2                                      | Inf | 1 | 0.02 | 0.00 |
| 15q#183048_183104 | 15 | 70341220-70794744   | 453525  | BC034424, HEXA, C15orf34, AK131033, ARIH1, AK0946 | 0   | 1 | 0.00 | 0.00 |
| 15q#183168_183212 | 15 | 71490925-71902731   | 411807  | AK131030, NPTN, CD276, LOC388135                  | 0   | 1 | 0.00 | 0.00 |
| 15q#182154_182162 | 15 | 62610217-62694062   | 83846   | ZNF609                                            | 0   | 1 | 0.00 | 0.00 |
| 15q#182243_182254 | 15 | 63222530-63286062   | 63533   | AL136922, CLPX, CILP                              | 0   | 1 | 0.00 | 0.00 |
| 15q#183044_183047 | 15 | 70321478-70335859   | 14382   | PARP6                                             | 0   | 1 | 0.00 | 0.00 |
| 15q#181769_181807 | 15 | 59056760-59377223   | 320464  | RORA                                              | 0   | 1 | 0.00 | 0.00 |
| 15q#181808_181826 | 15 | 59403819-59764921   | 361103  |                                                   | Inf | 1 | 0.02 | 0.00 |
| 5q#75912_75931    | 5  | 125910477-126074965 | 164489  | ALDH7A1, RNUXA, FLJ27505                          | 0   | 1 | 0.00 | 0.00 |
| 15q#181864_181894 | 15 | 60137384-60386372   | 248989  | VPS13C, BC034325, BC031230, FLJ38723              | Inf | 1 | 0.02 | 0.00 |
| 15q#181907_181971 | 15 | 60658910-61221072   | 562163  | BC014404, TLN2, BC038556, TPM1, LACTB             | Inf | 1 | 0.02 | 0.00 |
| 15q#182010_182035 | 15 | 61586848-61778154   | 191307  | USP3, BC036918, FBXL22, HERC1                     | Inf | 1 | 0.02 | 0.00 |
| 15q#182108_182153 | 15 | 62257649-62602442   | 344794  | CSNK1G1, BC062995, KIAA0101, TRIP4, ZNF609        | 0   | 1 | 0.00 | 0.00 |
| 15q#182163_182242 | 15 | 62699950-63215326   | 515377  | KHQ1, AK022288, ANKDD1A, SPG21, MTFMT, AK12960    | 0   | 1 | 0.00 | 0.00 |
| 15q#182255_182403 | 15 | 63293635-64420831   | 1127197 | PTPLAD1, AK074898, C15orf44, AJ271091, SLC24A1,   | 0   | 1 | 0.00 | 0.00 |
| 15q#182404_182444 | 15 | 64426078-64638798   | 212721  | FLJ20516, MAP2K1, SNAPC5, RPL4, ZWILCH, LCTL      | Inf | 1 | 0.02 | 0.00 |
| 15q#182829_182837 | 15 | 68469151-68582581   | 113431  |                                                   | Inf | 1 | 0.02 | 0.00 |
| 15q#182839_182848 | 15 | 68636839-68757615   | 120777  | UACA                                              | 0   | 1 | 0.00 | 0.00 |
| 15q#183464_183469 | 15 | 73729296-73754412   | 25117   | SH3PX3, CSPG4                                     | 0   | 1 | 0.00 | 0.00 |
| 15q#183476_183481 | 15 | 73806962-7383248    | 26287   | ODF3L1, AK091244                                  | 0   | 1 | 0.00 | 0.00 |
| 15q#183470_183475 | 15 | 73759409-73798021   | 38613   | CSPG4                                             | 0   | 1 | 0.00 | 0.00 |
| 5q#78226_78296    | 5  | 149481646-150001516 | 519871  | 7, CAMK2A, ARSI, TCOF1, CD74, RPS14, AB209107, NA | 0   | 1 | 0.00 | 0.00 |
| 5q#78303_78305    | 5  | 150024112-150035955 | 11844   | MYOZ3                                             | 0   | 1 | 0.00 | 0.00 |
| 5q#78397_78434    | 5  | 150905600-151244467 | 338868  | FAT2, SPARC, ATOX1, G3BP, GLRA1                   | 0   | 1 | 0.00 | 0.00 |
| 5q#78443_78468    | 5  | 151359087-151761182 | 402096  | AK001582, NMUR2                                   | 0   | 1 | 0.00 | 0.00 |
| 11p#142511_142525 | 11 | 37398955-37931830   | 532876  |                                                   | 0   | 1 | 0.00 | 0.00 |
| 11p#142554_142560 | 11 | 38970414-39157437   | 187024  |                                                   | 0   | 1 | 0.00 | 0.00 |
| 15q#181711_181768 | 15 | 58634705-59050590   | 415886  | RORA                                              | 0   | 1 | 0.00 | 0.00 |
| 15q#181972_182009 | 15 | 61227897-61573891   | 345995  | RPS27L, RAB8B, APH1B, CA12                        | Inf | 1 | 0.02 | 0.00 |
| 15q#182036_182045 | 15 | 61786042-61854222   | 68181   | HERC1                                             | Inf | 1 | 0.02 | 0.00 |
| 15q#182105_182107 | 15 | 62237349-62249479   | 12131   | PPIB, CSNK1G1                                     | 0   | 1 | 0.00 | 0.00 |
| 15q#182682_182697 | 15 | 66821938-66944818   | 122881  | ANF32A, BC017035                                  | 0   | 1 | 0.00 | 0.00 |
| 15q#182748_182828 | 15 | 67349004-68430052   | 1081049 | PAQR5, AK056793, KIF23, RPLP1, BC104434, BC06458  | 0   | 1 | 0.00 | 0.00 |
| 15q#183482_183485 | 15 | 73838850-73871097   | 32248   | AK123063                                          | 0   | 1 | 0.00 | 0.00 |
| 5q#78469_78600    | 5  | 151765456-153694397 | 1928942 | AK092848, AK123816, GRIA1, C5orf3, MFAP3, GALNT10 | 0   | 1 | 0.00 | 0.00 |
| 15q#181475_181482 | 15 | 56475442-56538535   | 63094   | LIPC                                              | 0   | 1 | 0.00 | 0.00 |
| 15q#181676_181687 | 15 | 58245452-58440569   | 195118  | ANXA2                                             | Inf | 1 | 0.02 | 0.00 |
| 15q#181688_181710 | 15 | 58448890-58624321   | 175432  | ANXA2, NARG2, BC035094, RORA                      | 0   | 1 | 0.00 | 0.00 |
| 5q#77190_77231    | 5  | 139005532-13940810  | 395279  | CXXC5, PSD2, NRG2                                 | 0   | 1 | 0.00 | 0.00 |
| 5q#78297_78302    | 5  | 150008360-150021167 | 12808   | SYNPO, AB028952, MYOZ3                            | 0   | 1 | 0.00 | 0.00 |



|                   |    |                     |         |                                                    |             |   |      |      |
|-------------------|----|---------------------|---------|----------------------------------------------------|-------------|---|------|------|
| 15q#181483_181536 | 15 | 56544047-56908032   | 363986  | LIPC, ADAM10, FAM63B                               | 0           | 1 | 0.00 | 0.00 |
| 15q#181629_181675 | 15 | 57649796-58230556   | 580761  | GCNT3, GTF2A2, BNIP2, G36793                       | Inf         | 1 | 0.02 | 0.00 |
| 1p#10131_10135    | 1  | 117487371-117584853 | 97483   |                                                    | 0           | 1 | 0.00 | 0.00 |
| 1p#10136_10151    | 1  | 117601968-117770928 | 168961  | MAN1A2                                             | 0           | 1 | 0.00 | 0.00 |
| 20q#214735_214741 | 20 | 28080970-28250181   | 169212  | AK127732, MGC72104, BC095491                       | 0           | 1 | 0.00 | 0.00 |
| 14q#177079_177093 | 14 | 99643257-99710232   | 66976   | EVL, DEGS2                                         | 0           | 1 | 0.00 | 0.00 |
| 14q#177066_177078 | 14 | 99547704-99640981   | 93278   | BC023997, EVL                                      | 0           | 1 | 0.00 | 0.00 |
| 14q#177573_177585 | 14 | 103624011-103666855 | 42845   | AX781433                                           | 0           | 1 | 0.00 | 0.00 |
| 14q#177599_177616 | 14 | 103741120-103886117 | 144998  |                                                    | 0           | 1 | 0.00 | 0.00 |
| 14q#177586_177598 | 14 | 103670841-103735961 | 65121   | AB033062                                           | 0           | 1 | 0.00 | 0.00 |
| 14q#177846_177847 | 14 | 105515561-105524742 | 9182    | LOC652848                                          | 0           | 1 | 0.00 | 0.00 |
| 14q#177850_177853 | 14 | 105556724-105584067 | 27344   | LOC652848                                          | 0           | 1 | 0.00 | 0.00 |
| 14q#170038_170041 | 14 | 21470699-21498498   | 27800   | BC063432                                           | 0           | 1 | 0.00 | 0.00 |
| 5q#79826_79841    | 5  | 170536801-170659645 | 122845  | RANBP17                                            | 0           | 1 | 0.00 | 0.00 |
| 5q#79876_79940    | 5  | 171195362-171772120 | 576759  | FBXW11, STK10, DC-Ubp, FLJ40453, SH3PXD2B          | 0           | 1 | 0.00 | 0.00 |
| 5q#80022_80073    | 5  | 172626082-173386370 | 760289  | 557, AF098462, STC2, FAM44B, AK074818, CPEB4, BC   | 0           | 1 | 0.00 | 0.00 |
| 14q#170043_170048 | 14 | 21511829-21545453   | 33625   | BC063432                                           | 0           | 1 | 0.00 | 0.00 |
| 3p#38047_38082    | 3  | 559911-1042716      | 482806  | AK126307                                           | 0           | 1 | 0.00 | 0.00 |
| 11q#144736_144740 | 11 | 65286084-65310979   | 24896   | AK126210, DKFZp761E198                             | Inf         | 1 | 0.02 | 0.00 |
| 11q#144677_144683 | 11 | 64865766-64902415   | 36650   | DPF2, TIGD3, AF334946, LOC283130                   | 0           | 1 | 0.00 | 0.00 |
| 3p#38083_38094    | 3  | 1054150-1113964     | 59815   | CNTN6                                              | 0           | 1 | 0.00 | 0.00 |
| 19q#212214_212285 | 19 | 61688939-62404717   | 715779  | 5720, AK130356, ZNF71, AK128767, AK095199, BC3729  | 0.692294348 | 1 | 0.02 | 0.02 |
| 3q#46149_46151    | 3  | 103086405-103128511 | 42107   |                                                    | 0           | 1 | 0.00 | 0.00 |
| 3p#38103_38117    | 3  | 1197913-1322352     | 124440  | CNTN6                                              | 0           | 1 | 0.00 | 0.00 |
| 3p#38126_38156    | 3  | 1402460-1815338     | 412879  | CNTN6                                              | Inf         | 1 | 0.02 | 0.00 |
| 3p#38178_38182    | 3  | 2103988-2144210     | 40223   | CNTN4                                              | 0           | 1 | 0.00 | 0.00 |
| 3p#39225_39364    | 3  | 13664555-15092284   | 1427730 | 43, XPC, LSM3, SLC6A6, AB051506, C3orf19, C3orf20, | Inf         | 1 | 0.02 | 0.00 |
| 15q#185238_185252 | 15 | 91316084-91430545   | 114462  | CHD2, BX37626, RGMA                                | 0           | 1 | 0.00 | 0.00 |
| 3p#39408_39409    | 3  | 15496109-15505804   | 9696    | COLQ                                               | 0           | 1 | 0.00 | 0.00 |
| 19q#211343_211367 | 19 | 54832128-54963694   | 131567  | AS, SR-A1, IRF3, BCL2L12, PRMT1, CPT1C, TSKS, AP4  | 0           | 1 | 0.00 | 0.00 |
| 3p#38095_38102    | 3  | 1120284-1189966     | 68683   | CNTN6                                              | 0           | 1 | 0.00 | 0.00 |
| 3p#39172_39181    | 3  | 12956535-13103787   | 147253  | IQSEC1, BC010267                                   | Inf         | 1 | 0.02 | 0.00 |
| 3p#39187_39224    | 3  | 13295807-13654801   | 358995  | NUP210, HDAC11, FBLN2                              | Inf         | 1 | 0.02 | 0.00 |
| 3p#39365_39407    | 3  | 15101485-15490058   | 388574  | CAPN7, SH3BP5, AK027185, METTL6, EAF1, AK1304      | 0           | 1 | 0.00 | 0.00 |
| 15q#185253_185265 | 15 | 91450198-91590294   | 140097  |                                                    | 0           | 1 | 0.00 | 0.00 |
| 19q#212100_212123 | 19 | 60680203-60828676   | 148474  | ZNF628, KLP1, AK092577, ZNF579, FLJ14768, ZNF524   | 0.692294348 | 1 | 0.02 | 0.02 |
| 19q#212476_212485 | 19 | 63752020-63784382   | 32363   | TRIM28, CHMP2A, UBE2M, ZNF42, MGC2752              | 0           | 1 | 0.00 | 0.00 |
| 11q#146315_146317 | 11 | 81830836-81872281   | 41446   |                                                    | Inf         | 1 | 0.02 | 0.00 |
| 3p#38019_38046    | 3  | 287038-546326       | 259289  | CHL1                                               | 0           | 1 | 0.00 | 0.00 |
| 3p#38382_38387    | 3  | 4226329-4279040     | 52712   | AY358092                                           | 0           | 1 | 0.00 | 0.00 |
| 3p#38183_38201    | 3  | 2153981-2317911     | 163931  | CNTN4                                              | 0           | 1 | 0.00 | 0.00 |
| 3p#38202_38210    | 3  | 2329154-2397360     | 68207   | CNTN4                                              | Inf         | 1 | 0.02 | 0.00 |
| 3p#38285_38381    | 3  | 3074347-4214956     | 1140610 | TN4, IL5RA, TRNT1, CRBN, AK095224, LRRN1, AY358    | 0           | 1 | 0.00 | 0.00 |
| 3p#38388_38394    | 3  | 4287755-4329762     | 42008   | AY358092, SETMAR                                   | 0           | 1 | 0.00 | 0.00 |
| 3p#38452_38464    | 3  | 4850140-5001555     | 151416  | ITPR1, AK056892, BHLHB2                            | Inf         | 1 | 0.02 | 0.00 |
| 3p#38465_38518    | 3  | 5005941-6100196     | 1094256 | ARL8B, EDEM1                                       | 0           | 1 | 0.00 | 0.00 |
| 11q#144684_144690 | 11 | 64905918-64948867   | 42950   | LOC283130, FKSG44, CR591879                        | 0           | 1 | 0.00 | 0.00 |
| 3p#38395_38422    | 3  | 4331005-4574567     | 243563  | SETMAR, AY358092, SUMF1, ITPR1                     | 0           | 1 | 0.00 | 0.00 |
| 3p#38423_38451    | 3  | 4586208-4844174     | 257967  | ITPR1                                              | Inf         | 1 | 0.02 | 0.00 |
| 3p#38713_38731    | 3  | 8731396-8907146     | 175751  | AK093066, CAV3, OXTR, RAD18                        | Inf         | 1 | 0.02 | 0.00 |
| 11q#144727_144735 | 11 | 65216604-65265522   | 48919   | HTATIP                                             | 0           | 1 | 0.00 | 0.00 |
| 11q#144742_144743 | 11 | 65323370-65328587   | 5218    |                                                    | Inf         | 1 | 0.02 | 0.00 |
| 3p#38118_38125    | 3  | 1331952-1389673     | 57722   | CNTN6                                              | 0           | 1 | 0.00 | 0.00 |
| 3p#38157_38158    | 3  | 1830073-1840696     | 10624   |                                                    | Inf         | 1 | 0.02 | 0.00 |
| 3p#38159_38177    | 3  | 1852985-2093731     | 240747  |                                                    | 0           | 1 | 0.00 | 0.00 |

|                   |    |                     |         |                                                     |             |   |      |      |
|-------------------|----|---------------------|---------|-----------------------------------------------------|-------------|---|------|------|
| 3p#38211_38216    | 3  | 2407891-2453905     | 46015   | CNTN4                                               | Inf         | 1 | 0.02 | 0.00 |
| 3p#38217_38284    | 3  | 2463369-3065426     | 602058  | CNTN4                                               | 0           | 1 | 0.00 | 0.00 |
| 11q#144699_144707 | 11 | 65038987-65090252   | 51266   | SCYL1, LTBP3, AF147366                              | 0           | 1 | 0.00 | 0.00 |
| 3p#38871_38950    | 3  | 10022312-10736870   | 714559  | #10, VHL, IRAK2, TATDN2, C3orf42, GHRL, SEC13L1, A  | Inf         | 1 | 0.02 | 0.00 |
| 3p#38951_38960    | 3  | 10767962-10866024   | 98063   | SLC6A11                                             | 0           | 1 | 0.00 | 0.00 |
| 3p#38961_39160    | 3  | 10873747-12844832   | 1971086 | ATG7, AL122075, VGLL4, C3orf31, SYN2, PPARG, TSE1   | Inf         | 1 | 0.02 | 0.00 |
| 11q#144708_144724 | 11 | 65094963-65186463   | 91501   | C083510, KCNK7, MAP3K11, AK026080, BX640978, SIF    | 0           | 1 | 0.00 | 0.00 |
| 3p#39161_39171    | 3  | 12849624-12951270   | 101647  | AB014567, RPL32, IQSEC1                             | Inf         | 1 | 0.02 | 0.00 |
| 3p#39182_39186    | 3  | 13129410-13253689   | 124280  |                                                     | Inf         | 1 | 0.02 | 0.00 |
| 14q#177823_177825 | 14 | 105343150-105354945 | 11796   | LOC652848                                           | 0           | 1 | 0.00 | 0.00 |
| 14q#177820_177822 | 14 | 105314254-105330970 | 16717   | LOC652848                                           | 0           | 1 | 0.00 | 0.00 |
| 20p#213090_213150 | 20 | 5069049-5835407     | 766359  | K123831, PROKR2, BC048109, AB037855, KIAA1434, F    | 0           | 1 | 0.00 | 0.00 |
| 20p#213151_213208 | 20 | 5840960-6620249     | 779290  | GI-09, MCM8, CRLS1, C20orf75, BC019703, C20orf42, I | 0           | 1 | 0.00 | 0.00 |
| 20p#213218_213300 | 20 | 6747437-8289753     | 1542317 | C038533, BC039538, BC043288, HAO1, TXNDC13, PLC     | 0           | 1 | 0.00 | 0.00 |
| 20p#213349_213418 | 20 | 8738791-9402441     | 663651  | PLCB1, AL137267, PLCB4                              | 0           | 1 | 0.00 | 0.00 |
| 20p#213425_213573 | 20 | 9446826-11427828    | 1981003 | K124961, ANKRD5, SNAP25, AK054772, MKKS, C20orf     | 0           | 1 | 0.00 | 0.00 |
| 3p#38546_38643    | 3  | 6694025-7658789     | 964765  | AF279782, GRM7                                      | 0           | 1 | 0.00 | 0.00 |
| 5p#69010_69013    | 5  | 22009305-22038434   | 29130   | CDH12                                               | 0           | 1 | 0.00 | 0.00 |
| 3p#38856_38861    | 3  | 9933034-9959504     | 26471   | IL17RE, IL17RC, CRELD1                              | 0           | 1 | 0.00 | 0.00 |
| 20p#214723_214724 | 20 | 25680495-25821124   | 140630  |                                                     | 0           | 1 | 0.00 | 0.00 |
| 3q#51337_51372    | 3  | 169007766-169624306 | 616541  | SERPINI1, BC043538, GOLPH4                          | 0           | 1 | 0.00 | 0.00 |
| 20p#212486_212492 | 20 | 8747-57322          | 48576   | DEFB125                                             | 0           | 1 | 0.00 | 0.00 |
| 20p#212868_212895 | 20 | 3166415-3429831     | 263417  | AK091157, AL110249, ATRN                            | 0           | 1 | 0.00 | 0.00 |
| 14q#177814_177817 | 14 | 105239424-105280567 | 41144   | S55096, LOC652848                                   | 0           | 1 | 0.00 | 0.00 |
| 14q#177800_177801 | 14 | 105082760-105105366 | 22607   | S55096                                              | 0           | 1 | 0.00 | 0.00 |
| 5p#67801_67805    | 5  | 4186850-4253625     | 66776   |                                                     | 0           | 1 | 0.00 | 0.00 |
| 5p#67795_67800    | 5  | 4104060-4169806     | 65747   |                                                     | 0           | 1 | 0.00 | 0.00 |
| 5p#68913_68935    | 5  | 20252370-20709857   | 457488  | AK093362                                            | 0           | 1 | 0.00 | 0.00 |
| 5p#69018_69028    | 5  | 22098641-22192403   | 93763   | CDH12                                               | 0           | 1 | 0.00 | 0.00 |
| 5p#69068_69103    | 5  | 22570449-22897097   | 326649  | CDH12                                               | 0           | 1 | 0.00 | 0.00 |
| 5p#67788_67794    | 5  | 3998941-4092634     | 93694   |                                                     | 0           | 1 | 0.00 | 0.00 |
| 3q#53477_53484    | 3  | 194684380-194750504 | 66125   | ATP13A4                                             | 0           | 1 | 0.00 | 0.00 |
| 16p#189112_189117 | 16 | 34878278-35005009   | 126732  | BC016176                                            | 1.398928118 | 1 | 0.03 | 0.02 |
| 16p#189106_189109 | 16 | 34685270-34739434   | 54165   |                                                     | 1.398928118 | 1 | 0.03 | 0.02 |
| 16p#189110_189111 | 16 | 34814342-34847384   | 33043   | AK129756                                            | 1.398928118 | 1 | 0.03 | 0.02 |
| 16p#189096_189104 | 16 | 34397154-34605089   | 207936  | BC038774                                            | 1.398928118 | 1 | 0.03 | 0.02 |
| 1q#15435_15444    | 1  | 199636069-199709450 | 73382   | AF093822, ADIPOR1, CYB5R1, C1orf37                  | 0.686886232 | 1 | 0.03 | 0.05 |
| 1q#16031_16053    | 1  | 205316497-205990639 | 674143  | AK091113                                            | 1.044194198 | 1 | 0.05 | 0.05 |
| 1q#12152_12174    | 1  | 158392593-158528831 | 136239  | FCRLM1, FCRLM2, DUSP12, ATF6                        | Inf         | 1 | 0.02 | 0.00 |
| 1q#12185_12197    | 1  | 158624841-158747388 | 122548  | ATF6, OLFML2B                                       | Inf         | 1 | 0.02 | 0.00 |
| 1q#12289_12532    | 1  | 159711883-163223760 | 3511878 | RXRG, AK093132, LRRC52, MGST3, ALDH9A1, TMCO1       | Inf         | 1 | 0.02 | 0.00 |
| 1q#12105_12106    | 1  | 158080538-158088293 | 7756    | MPZ                                                 | Inf         | 1 | 0.02 | 0.00 |
| 1q#10714_10768    | 1  | 147528905-147904004 | 375100  | LASS2, ANXA9, FAM63A, PRUNE, BNIPL, C1orf56, CD     | Inf         | 1 | 0.02 | 0.00 |
| 1q#10835_10849    | 1  | 148359750-148482711 | 122962  | TUFT1, SNX27                                        | Inf         | 1 | 0.02 | 0.00 |
| 1q#11099_11100    | 1  | 150260693-150281204 | 20512   |                                                     | Inf         | 1 | 0.02 | 0.00 |
| 1q#15280_15303    | 1  | 198241513-198504513 | 263001  | NAV1                                                | 1.398928118 | 1 | 0.03 | 0.02 |
| 1q#15498_15507    | 1  | 200101162-200201836 | 100675  | PRELP, OPTC                                         | 0.921973749 | 1 | 0.07 | 0.07 |
| 1q#10575_10577    | 1  | 145820605-145870779 | 50175   |                                                     | Inf         | 1 | 0.02 | 0.00 |
| 1q#10366_10367    | 1  | 141522171-141527841 | 5671    |                                                     | 0           | 1 | 0.00 | 0.00 |
| 1q#12731_12799    | 1  | 165100386-165948360 | 847975  | 2, AF085892, XCL1, DPT, BC009319, BC041008, ATP1E   | 1.398928118 | 1 | 0.03 | 0.02 |
| 1q#10995_10998    | 1  | 149561702-149573854 | 12153   | LCE1E                                               | 0.692294348 | 1 | 0.02 | 0.02 |
| 1q#11520_11529    | 1  | 153229444-153318916 | 89473   | MEF2D, IQGAP3                                       | Inf         | 1 | 0.02 | 0.00 |
| 1q#12533_12669    | 1  | 163243055-164546441 | 1303387 | AY726559, C1orf32, MAEL, GPA33, POU2F1, BC03786     | Inf         | 1 | 0.02 | 0.00 |
| 1q#10967_10969    | 1  | 149399307-149408229 | 8923    |                                                     | Inf         | 1 | 0.02 | 0.00 |
| 1q#11613_11623    | 1  | 153893892-153984201 | 90310   | L16464, ETV3                                        | Inf         | 1 | 0.02 | 0.00 |

|                   |    |                     |         |                                                      |     |   |      |      |
|-------------------|----|---------------------|---------|------------------------------------------------------|-----|---|------|------|
| 1q#11417_11444    | 1  | 152521242-152730093 | 208852  | GON4L, AY335491, SYT11, AK026178, RIT1, KIAA0907,    | Inf | 1 | 0.02 | 0.00 |
| 9q#122526_122544  | 9  | 77696407-77863786   | 167380  | GNAQ                                                 | 0   | 1 | 0.00 | 0.00 |
| 9q#122711_122732  | 9  | 81415573-81643318   | 227746  | TLE1, BC036431                                       | 0   | 1 | 0.00 | 0.00 |
| 9q#122502_122525  | 9  | 77461686-77686271   | 224586  | GNA14, GNAQ                                          | 0   | 1 | 0.00 | 0.00 |
| 9q#122545_122681  | 9  | 77869915-80557630   | 2687716 | GNAQ, AK022705, PSAT1, TLE4                          | 0   | 1 | 0.00 | 0.00 |
| 9q#122733_122794  | 9  | 81668283-82965248   | 1296966 | AK128229, AK097447, FLJ46321, AK056882, RASEF        | 0   | 1 | 0.00 | 0.00 |
| 9q#122701_122710  | 9  | 81097930-81398846   | 300917  |                                                      | 0   | 1 | 0.00 | 0.00 |
| 9q#122405_122434  | 9  | 76434030-76708191   | 274162  | KIAA0367, AF103907, AK094553, C9orf65                | 0   | 1 | 0.00 | 0.00 |
| 9q#122462_122500  | 9  | 77082534-77450850   | 368317  | VPS13A, GNA14                                        | 0   | 1 | 0.00 | 0.00 |
| 16q#191235_191250 | 16 | 70704304-70961172   | 256889  | PMFBP1                                               | 0   | 1 | 0.00 | 0.00 |
| 9q#121763_122395  | 9  | 68721193-76284769   | 7563577 | 2, C9orf77, C9orf85, AK057071, BC028019, GDA, AK095  | 0   | 1 | 0.00 | 0.00 |
| 9q#122682_122700  | 9  | 80581153-81099809   | 488657  |                                                      | 0   | 1 | 0.00 | 0.00 |
| 9q#122795_122819  | 9  | 82997132-83277751   | 280620  | FRMD3                                                | 0   | 1 | 0.00 | 0.00 |
| 9p#120353_120364  | 9  | 21593915-21845173   | 251259  | MTAP                                                 | Inf | 1 | 0.02 | 0.00 |
| 9p#120527_120528  | 9  | 25114915-25144737   | 29823   |                                                      | Inf | 1 | 0.02 | 0.00 |
| 16q#191949_192034 | 16 | 79691939-80533657   | 841719  | PKD1L2, BCMO1, GAN, AK095707, CMIP, PLCG2            | 0   | 1 | 0.00 | 0.00 |
| 16q#190217_190219 | 16 | 58271139-58334813   | 63675   |                                                      | 0   | 1 | 0.00 | 0.00 |
| 16q#191319_191332 | 16 | 71874680-72107153   | 232474  | G49380                                               | 0   | 1 | 0.00 | 0.00 |
| 16q#189571_189577 | 16 | 51030184-51072073   | 41890   | AK095095, AK027006                                   | 0   | 1 | 0.00 | 0.00 |
| 16q#189578_189594 | 16 | 51094101-51357643   | 263543  | BC029912                                             | 0   | 1 | 0.00 | 0.00 |
| 9p#120170_120198  | 9  | 20111574-20484726   | 373153  | MLLT3                                                | Inf | 1 | 0.02 | 0.00 |
| 16q#189547_189554 | 16 | 50341282-50593012   | 251731  |                                                      | Inf | 1 | 0.02 | 0.00 |
| 16q#189561_189570 | 16 | 50811587-51021205   | 209619  |                                                      | 0   | 1 | 0.00 | 0.00 |
| 16q#189595_189601 | 16 | 51377300-51623471   | 246172  |                                                      | 0   | 1 | 0.00 | 0.00 |
| 16q#189602_189610 | 16 | 51636895-51724608   | 87714   | CHD9                                                 | 0   | 1 | 0.00 | 0.00 |
| 16q#190054_190076 | 16 | 56335210-56546133   | 210924  | KATNB1, KIFC3, AK091891, CNGB1                       | 0   | 1 | 0.00 | 0.00 |
| 16q#191123_191128 | 16 | 69802567-69854629   | 52063   | HYDIN                                                | 0   | 1 | 0.00 | 0.00 |
| 16q#191042_191051 | 16 | 69099803-69172675   | 72873   | COG4, SF3B3, D13642                                  | 0   | 1 | 0.00 | 0.00 |
| 9q#121721_121762  | 9  | 68335269-68715791   | 380523  | PGM5, C9orf71, BC039548, PIP5K1B                     | 0   | 1 | 0.00 | 0.00 |
| 9q#122396_122404  | 9  | 76303218-76395427   | 92210   | AY196293, GCNT1                                      | 0   | 1 | 0.00 | 0.00 |
| 9q#122435_122455  | 9  | 76715510-77016903   | 301394  | C9orf65                                              | 0   | 1 | 0.00 | 0.00 |
| 9q#122820_122976  | 9  | 83283586-85210249   | 1926664 | AX721189, GKAP1, KIF27, C9orf64, HNRPK, C9orf76, 4   | 0   | 1 | 0.00 | 0.00 |
| 9q#122996_123043  | 9  | 85469221-85960950   | 491730  | AGTPBP1, CR613032, MAK10, GOLPH2                     | 0   | 1 | 0.00 | 0.00 |
| 14q#175490_175644 | 14 | 79818841-81354774   | 1535934 | C14orf145, BX248746, TSHR, GTF2A1, AB208948, STC     | 0   | 1 | 0.00 | 0.00 |
| 14q#175662_175663 | 14 | 81764223-81792184   | 27962   |                                                      | 0   | 1 | 0.00 | 0.00 |
| 14q#175748_175792 | 14 | 84349641-85211757   | 862117  | AK131026, BX248253, FLRT2                            | 0   | 1 | 0.00 | 0.00 |
| 9p#120043_120050  | 9  | 18698744-18794207   | 95464   | ADAMTSL1, BX640951                                   | Inf | 1 | 0.02 | 0.00 |
| 9p#120051_120061  | 9  | 18810734-18899663   | 88930   | BX640951, C9orf94                                    | Inf | 1 | 0.02 | 0.00 |
| 9p#120161_120169  | 9  | 19917491-20096994   | 169504  | AK123856                                             | Inf | 1 | 0.02 | 0.00 |
| 9p#120266_120272  | 9  | 20992866-21036817   | 43952   | BC114215, PTPLAD2                                    | Inf | 1 | 0.02 | 0.00 |
| 9p#120529_120530  | 9  | 25195505-25217305   | 21801   |                                                      | Inf | 1 | 0.02 | 0.00 |
| 9p#120857_120866  | 9  | 30414069-30542394   | 128326  | BC022036                                             | 0   | 1 | 0.00 | 0.00 |
| 9p#120365_120367  | 9  | 21853204-21875202   | 21999   | MTAP, AF109294                                       | Inf | 1 | 0.02 | 0.00 |
| 9p#120368_120488  | 9  | 21892814-23843451   | 1950638 | KN2A, CDKN2B, DMRTA1, AK092601, CR627240, BC04       | Inf | 1 | 0.02 | 0.00 |
| 9p#120501_120503  | 9  | 24197831-24279720   | 81890   |                                                      | Inf | 1 | 0.02 | 0.00 |
| 16q#191753_191806 | 16 | 77037460-77515188   | 477729  | WWOX                                                 | 0   | 1 | 0.00 | 0.00 |
| 16q#191875_191948 | 16 | 78706903-79684607   | 977705  | 02, C16orf61, C16orf60, AK023669, AK026313, ASCIZ, 4 | 0   | 1 | 0.00 | 0.00 |
| 16q#192035_192050 | 16 | 80540935-80638418   | 97484   | PLCG2, AK026740, HSPC105, HSD17B2                    | 0   | 1 | 0.00 | 0.00 |
| 16q#189835_189848 | 16 | 54522053-54797266   | 275214  | BC035113, GNAO1                                      | 0   | 1 | 0.00 | 0.00 |
| 16q#190078_190094 | 16 | 56561057-56658286   | 97230   | CNGB1, TEPP, ZNF319, C16orf57, MMP15                 | 0   | 1 | 0.00 | 0.00 |
| 16q#190155_190216 | 16 | 57203733-58249386   | 1045654 | CNOT1, FLJ10815, AK098376, GOT2, FLJ32951            | 0   | 1 | 0.00 | 0.00 |
| 16q#191251_191318 | 16 | 70993343-71838087   | 844745  | AK095618, AK021563, ATBF1, D10250, L32833, C16orf4   | 0   | 1 | 0.00 | 0.00 |
| 16q#191333_191392 | 16 | 72120686-72917613   | 796928  | G49380, BC043527, PSMD7, AK125450                    | 0   | 1 | 0.00 | 0.00 |
| 16q#191400_191490 | 16 | 73043507-73901752   | 858246  | DR59, ZNRF1, LDHD, AF344192, ZFP1, BC064604, CTF     | 0   | 1 | 0.00 | 0.00 |
| 16q#189186_189193 | 16 | 45626287-45720105   | 93819   | NETO2                                                | 0   | 1 | 0.00 | 0.00 |

|                   |    |                     |         |  |  |  |  |  |  |   |      |      |
|-------------------|----|---------------------|---------|--|--|--|--|--|--|---|------|------|
| 16q#189535_189540 | 16 | 49972555-50174979   | 202425  |  |  |  |  |  |  | 1 | 0.02 | 0.00 |
| 16q#189556_189560 | 16 | 50646895-50773917   | 127023  |  |  |  |  |  |  | 1 | 0.00 | 0.00 |
| 16q#191516_191521 | 16 | 74095899-74132960   | 37062   |  |  |  |  |  |  | 1 | 0.00 | 0.00 |
| 16q#190010_190053 | 16 | 56005735-56328747   | 323013  |  |  |  |  |  |  | 1 | 0.00 | 0.00 |
| 6q#88724_88758    | 6  | 101144325-101482776 | 338452  |  |  |  |  |  |  | 1 | 0.00 | 0.00 |
| 16q#189923_189930 | 16 | 55339610-55399104   | 59495   |  |  |  |  |  |  | 1 | 0.00 | 0.00 |
| 9q#121714_121720  | 9  | 68272869-68325334   | 52466   |  |  |  |  |  |  | 1 | 0.00 | 0.00 |
| 14q#175174_175199 | 14 | 76989314-77144770   | 155457  |  |  |  |  |  |  | 1 | 0.00 | 0.00 |
| 14q#175275_175284 | 14 | 77883181-77960406   | 77226   |  |  |  |  |  |  | 1 | 0.00 | 0.00 |
| 14q#175345_175351 | 14 | 78437201-78486598   | 49398   |  |  |  |  |  |  | 1 | 0.00 | 0.00 |
| 14q#175378_175385 | 14 | 78694291-78748242   | 53952   |  |  |  |  |  |  | 1 | 0.00 | 0.00 |
| 14q#175394_175402 | 14 | 78823911-78884276   | 60366   |  |  |  |  |  |  | 1 | 0.00 | 0.00 |
| 14q#175469_175489 | 14 | 79429312-79806473   | 377162  |  |  |  |  |  |  | 1 | 0.00 | 0.00 |
| 14q#175681_175735 | 14 | 82302141-83957896   | 1655756 |  |  |  |  |  |  | 1 | 0.00 | 0.00 |
| 14q#175992_176084 | 14 | 88532064-89456082   | 924019  |  |  |  |  |  |  | 1 | 0.00 | 0.00 |
| 14q#176101_176202 | 14 | 89579338-90430524   | 851187  |  |  |  |  |  |  | 1 | 0.00 | 0.00 |
| 9q#123912_123964  | 9  | 96288053-96886888   | 600636  |  |  |  |  |  |  | 1 | 0.00 | 0.00 |
| 9q#124030_124075  | 9  | 97535556-97959791   | 424236  |  |  |  |  |  |  | 1 | 0.00 | 0.00 |
| 9q#124117_124135  | 9  | 98340480-98489796   | 149317  |  |  |  |  |  |  | 1 | 0.00 | 0.00 |
| 9p#119725_119728  | 9  | 14733756-14765819   | 32064   |  |  |  |  |  |  | 1 | 0.00 | 0.00 |
| 9p#119938_119948  | 9  | 17225697-17339655   | 113959  |  |  |  |  |  |  | 1 | 0.02 | 0.00 |
| 9p#120039_120042  | 9  | 18665838-18689161   | 23324   |  |  |  |  |  |  | 1 | 0.02 | 0.00 |
| 16q#189811_189823 | 16 | 54285485-54379893   | 94409   |  |  |  |  |  |  | 1 | 0.00 | 0.00 |
| 16q#189849_189875 | 16 | 54807495-55038062   | 230568  |  |  |  |  |  |  | 1 | 0.00 | 0.00 |
| 9p#119729_119733  | 9  | 14782811-14814781   | 31971   |  |  |  |  |  |  | 1 | 0.00 | 0.00 |
| 9p#119857_119882  | 9  | 16246409-16581104   | 334696  |  |  |  |  |  |  | 1 | 0.00 | 0.00 |
| 16q#190095_190154 | 16 | 56672583-57195520   | 522938  |  |  |  |  |  |  | 1 | 0.00 | 0.00 |
| 16q#192051_192117 | 16 | 80645052-81559410   | 914359  |  |  |  |  |  |  | 1 | 0.00 | 0.00 |
| 16q#192211_192226 | 16 | 82393524-82524646   | 131123  |  |  |  |  |  |  | 1 | 0.00 | 0.00 |
| 6q#88713_88723    | 6  | 101028583-101131946 | 103364  |  |  |  |  |  |  | 1 | 0.00 | 0.00 |
| 16q#189920_189922 | 16 | 55306393-55328422   | 22030   |  |  |  |  |  |  | 1 | 0.00 | 0.00 |
| 14q#176904_176939 | 14 | 97159995-98006092   | 846098  |  |  |  |  |  |  | 1 | 0.00 | 0.00 |
| 16q#189194_189208 | 16 | 45725774-45850158   | 124385  |  |  |  |  |  |  | 1 | 0.00 | 0.00 |
| 16q#189209_189217 | 16 | 45867161-45957367   | 90207   |  |  |  |  |  |  | 1 | 0.02 | 0.00 |
| 9q#123044_123188  | 9  | 85968785-87868655   | 1899871 |  |  |  |  |  |  | 1 | 0.00 | 0.00 |
| 16q#189531_189534 | 16 | 49837540-49929631   | 92092   |  |  |  |  |  |  | 1 | 0.02 | 0.00 |
| 16q#189177_189185 | 16 | 45529748-45607583   | 77836   |  |  |  |  |  |  | 1 | 0.00 | 0.00 |
| 16q#189760_189766 | 16 | 53660997-53856343   | 195347  |  |  |  |  |  |  | 1 | 0.00 | 0.00 |
| 9p#120062_120073  | 9  | 18906666-19025066   | 118401  |  |  |  |  |  |  | 1 | 0.02 | 0.00 |
| 9p#120122_120130  | 9  | 19460403-19554332   | 93930   |  |  |  |  |  |  | 1 | 0.02 | 0.00 |
| 9p#120531_120564  | 9  | 25249013-26060380   | 811368  |  |  |  |  |  |  | 1 | 0.02 | 0.00 |
| 9p#120728_120754  | 9  | 28088731-28335831   | 247101  |  |  |  |  |  |  | 1 | 0.02 | 0.00 |
| 9p#120854_120856  | 9  | 30347226-30392301   | 45076   |  |  |  |  |  |  | 1 | 0.00 | 0.00 |
| 9p#120867_120889  | 9  | 30556050-31094204   | 538155  |  |  |  |  |  |  | 1 | 0.00 | 0.00 |
| 16q#190950_190967 | 16 | 68217814-68351471   | 133658  |  |  |  |  |  |  | 1 | 0.00 | 0.00 |
| 16q#189931_190009 | 16 | 55410019-55998732   | 588714  |  |  |  |  |  |  | 1 | 0.00 | 0.00 |
| 16q#191118_191121 | 16 | 69763173-69784808   | 21636   |  |  |  |  |  |  | 1 | 0.00 | 0.00 |
| 14q#174987_175004 | 14 | 75281559-75422384   | 140826  |  |  |  |  |  |  | 1 | 0.00 | 0.00 |
| 14q#175012_175094 | 14 | 75490479-76393534   | 903056  |  |  |  |  |  |  | 1 | 0.00 | 0.00 |
| 14q#175285_175306 | 14 | 77974180-78136463   | 162284  |  |  |  |  |  |  | 1 | 0.00 | 0.00 |
| 14q#175352_175377 | 14 | 78493278-78688387   | 195110  |  |  |  |  |  |  | 1 | 0.00 | 0.00 |
| 14q#175386_175393 | 14 | 78756252-78816279   | 60028   |  |  |  |  |  |  | 1 | 0.00 | 0.00 |
| 14q#175403_175468 | 14 | 78890120-79417372   | 527253  |  |  |  |  |  |  | 1 | 0.00 | 0.00 |
| 14q#176224_176426 | 14 | 90618685-92371688   | 1753004 |  |  |  |  |  |  | 1 | 0.00 | 0.00 |
| 9p#120019_120038  | 9  | 18464451-18656103   | 191653  |  |  |  |  |  |  | 1 | 0.02 | 0.00 |

|            |        |    |                     |         |                                                    |  |     |   |      |      |
|------------|--------|----|---------------------|---------|----------------------------------------------------|--|-----|---|------|------|
| 9p#120890  | 120891 | 9  | 31134867-31181597   | 46731   |                                                    |  | 0   | 1 | 0.00 | 0.00 |
| 9p#120906  | 120915 | 9  | 31485367-31597658   | 11292   | AK124280                                           |  | Inf | 1 | 0.02 | 0.00 |
| 9q#121707  | 121708 | 9  | 67935857-67953563   | 17707   | FOXDL4, CBWD5                                      |  | 0   | 1 | 0.00 | 0.00 |
| 9q#123584  | 123587 | 9  | 92805464-92819130   | 13667   | BC032429, FGD3                                     |  | 0   | 1 | 0.00 | 0.00 |
| 9q#123861  | 123911 | 9  | 95765109-96276488   | 511380  | 33, C9orf102, BC033161, BC064972, AK055173, HSD17A |  | 0   | 1 | 0.00 | 0.00 |
| 9q#123965  | 123999 | 9  | 96894382-97283617   | 389236  | 67289, AK098764, KIAA1529, CR627453, AL833510, TD  |  | 0   | 1 | 0.00 | 0.00 |
| 9q#124001  | 124029 | 9  | 97302445-97531356   | 228912  | TDRD7, BC002660, TMOD1, C9orf97, NCBP1, XPA        |  | 0   | 1 | 0.00 | 0.00 |
| 9q#124076  | 124091 | 9  | 97966373-98105714   | 139342  | CORO2A, TBC1D2                                     |  | 0   | 1 | 0.00 | 0.00 |
| 9q#124092  | 124116 | 9  | 98113935-98332173   | 218239  | GABBR2                                             |  | 0   | 1 | 0.00 | 0.00 |
| 9q#124136  | 124189 | 9  | 98495177-99002314   | 507138  | R2, ANKS6, GALNT12, AK024865, COL15A1, L25286, T   |  | 0   | 1 | 0.00 | 0.00 |
| 9q#124190  | 124337 | 9  | 99010150-100832289  | 1822140 | 3030723, STX17, TXNDC4, INVS, TEX10, BC042955, C9  |  | 0   | 1 | 0.00 | 0.00 |
| 16q#189876 | 189919 | 16 | 55044728-55296231   | 251504  | 2291, MT4, MT3, MT2A, MT1E, MT1A, MTM, MT1B, MT1   |  | 0   | 1 | 0.00 | 0.00 |
| 9p#119702  | 119724 | 9  | 14532081-14727314   | 195234  | AF161360, ZDHHC21, CER1, FREM1                     |  | 0   | 1 | 0.00 | 0.00 |
| 9p#119828  | 119856 | 9  | 15802255-16220845   | 418591  | C9orf93, AL832443                                  |  | 0   | 1 | 0.00 | 0.00 |
| 9p#119935  | 119937 | 9  | 17199790-17215074   | 15285   | BX647069                                           |  | 0   | 1 | 0.00 | 0.00 |
| 9p#119949  | 119998 | 9  | 17347695-17841118   | 493424  | C9orf39, SH3GL2                                    |  | Inf | 1 | 0.02 | 0.00 |
| 16q#192227 | 192228 | 16 | 82529798-82536297   | 6500    |                                                    |  | 0   | 1 | 0.00 | 0.00 |
| 16q#192235 | 192265 | 16 | 82579676-82791172   | 211497  | 2, MBTPS1, HSDL1, LRRC50, TAF1C, AK131102, LOC     |  | 0   | 1 | 0.00 | 0.00 |
| 18p#200897 | 200953 | 18 | 2978796-3437318     | 458523  | LPIN2, MYOM1, AK093324, MRCL3, MRLC2, TGIF         |  | 0   | 1 | 0.00 | 0.00 |
| 16q#189173 | 189176 | 16 | 45495024-45518303   | 23280   | GPT2                                               |  | 0   | 1 | 0.00 | 0.00 |
| 13q#165558 | 165570 | 13 | 56986013-57144494   | 158482  | PCDH17                                             |  | 0   | 1 | 0.00 | 0.00 |
| 16q#189340 | 189341 | 16 | 47641974-47668570   | 26597   |                                                    |  | Inf | 1 | 0.02 | 0.00 |
| 16q#189342 | 189360 | 16 | 47717059-47959059   | 242001  | CBLN1, AK126710, AK128747                          |  | Inf | 1 | 0.02 | 0.00 |
| 16q#189361 | 189363 | 16 | 47965351-47983789   | 18439   | MGC33367                                           |  | Inf | 1 | 0.02 | 0.00 |
| 16q#189519 | 189530 | 16 | 49675725-49819137   | 143413  | SALL1                                              |  | Inf | 1 | 0.02 | 0.00 |
| 9q#123189  | 123195 | 9  | 87904244-88032966   | 128723  | AK124340                                           |  | 0   | 1 | 0.00 | 0.00 |
| 14q#174762 | 174779 | 14 | 73523590-73634342   | 110753  | ENTPD5, BC044808, C14orf45, ALDH6A1, C14orf46      |  | 0   | 1 | 0.00 | 0.00 |
| 14q#175099 | 175113 | 14 | 76431158-76567506   | 136349  | C14orf4                                            |  | 0   | 1 | 0.00 | 0.00 |
| 14q#175114 | 175119 | 14 | 76571673-76615896   | 44224   | AK092322, BC038792                                 |  | 0   | 1 | 0.00 | 0.00 |
| 14q#175120 | 175173 | 14 | 76615837-76977324   | 361488  | TMEM63C, NGB, POMT2, GSTZ1, TMED8, C14orf174,      |  | 0   | 1 | 0.00 | 0.00 |
| 9p#119660  | 119699 | 9  | 14053079-14473349   | 420271  | NFIB, AK131233                                     |  | 0   | 1 | 0.00 | 0.00 |
| 9p#119883  | 119920 | 9  | 16595000-17010153   | 415154  | BNC2                                               |  | 0   | 1 | 0.00 | 0.00 |
| 16q#191393 | 191399 | 16 | 72933295-73030088   | 96794   | BC037579, LOC348174                                |  | 0   | 1 | 0.00 | 0.00 |
| 16q#192118 | 192210 | 16 | 81566970-82387333   | 820364  | CDH13                                              |  | 0   | 1 | 0.00 | 0.00 |
| 11q#148311 | 148324 | 11 | 107430837-107552278 | 121442  | CUL5, ACAT1, NPAT                                  |  | 0   | 1 | 0.00 | 0.00 |
| 13q#164107 | 164157 | 13 | 40355567-40760688   | 405122  | 3, ELF1, BX640798, WBP4, KBTBD6, AK056182, KBTBD   |  | 0   | 1 | 0.00 | 0.00 |
| 16q#189758 | 189759 | 16 | 53568790-53611847   | 43058   |                                                    |  | 0   | 1 | 0.00 | 0.00 |
| 9p#120074  | 120098 | 9  | 19029291-19243114   | 213824  | RRAGA, FAM29A, ADFP, AK094196                      |  | Inf | 1 | 0.02 | 0.00 |
| 9p#120099  | 120121 | 9  | 19266977-19448857   | 181881  | AK000693, DENND4C, RPS6, AF370405, ASAH3L          |  | 0   | 1 | 0.00 | 0.00 |
| 9p#120565  | 120571 | 9  | 26071304-26152174   | 80871   | FLJ16323                                           |  | Inf | 1 | 0.02 | 0.00 |
| 12p#153279 | 153292 | 12 | 27306333-27444989   | 138657  | STK38L, ARNTL2                                     |  | 0   | 1 | 0.00 | 0.00 |
| 11q#148922 | 148938 | 11 | 114691283-114824689 | 133407  | IGSF4                                              |  | 0   | 1 | 0.00 | 0.00 |
| 11q#149115 | 149132 | 11 | 117258894-117410367 | 151474  | TMPRSS13, IL17ORA, AB231754                        |  | 0   | 1 | 0.00 | 0.00 |
| 9p#121670  | 121671 | 9  | 40500456-40503447   | 2992    | BC031626, ZNF658                                   |  | 0   | 1 | 0.00 | 0.00 |
| 9p#120935  | 120936 | 9  | 32131856-32162666   | 30811   |                                                    |  | 0   | 1 | 0.00 | 0.00 |
| 16q#192588 | 192590 | 16 | 86106793-86134578   | 27786   |                                                    |  | 0   | 1 | 0.00 | 0.00 |
| 13q#163734 | 163748 | 13 | 36189294-36316736   | 127443  | RFXAP, AK095147                                    |  | 0   | 1 | 0.00 | 0.00 |
| 13q#163751 | 163822 | 13 | 36337632-37151854   | 814223  | 766, ALG5, EXOSC8, FAM48A, CSNK1A1L, AK092066,     |  | 0   | 1 | 0.00 | 0.00 |
| 16q#189767 | 189779 | 16 | 53871524-54012327   | 140804  | IRX6, AL832088                                     |  | 0   | 1 | 0.00 | 0.00 |
| 16q#189783 | 189785 | 16 | 5406694-54078204    | 17511   | AL832088, MMP2                                     |  | 0   | 1 | 0.00 | 0.00 |
| 16q#189786 | 189810 | 16 | 54082846-54276705   | 193860  | MMP2, AYTL1, BX641069, SLC6A2                      |  | 0   | 1 | 0.00 | 0.00 |
| 9p#119308  | 119319 | 9  | 8321541-8426637     | 105097  | PTPRD                                              |  | Inf | 1 | 0.02 | 0.00 |
| 9p#119329  | 119333 | 9  | 8501585-8543225     | 41641   | PTPRD                                              |  | Inf | 1 | 0.02 | 0.00 |
| 9p#120016  | 120018 | 9  | 18421312-18456865   | 35554   |                                                    |  | Inf | 1 | 0.02 | 0.00 |
| 9p#120892  | 120905 | 9  | 31208658-31463899   | 255242  |                                                    |  | 0   | 1 | 0.00 | 0.00 |

|                   |    |                     |         |                                                   |             |   |      |      |
|-------------------|----|---------------------|---------|---------------------------------------------------|-------------|---|------|------|
| 9p#120916_120934  | 9  | 31605752-32084249   | 478498  | AK124280                                          | 0           | 1 | 0.00 | 0.00 |
| 11p#139438_139453 | 11 | 2002204-2134075     | 131872  | CR615897, DQ104205, IGF2, IGF2AS                  | 0           | 1 | 0.00 | 0.00 |
| 16q#192229_192234 | 16 | 82540166-82572233   | 32068   | OKL38, EFCBP2                                     | 0           | 1 | 0.00 | 0.00 |
| 16q#192266_192292 | 16 | 82798179-83008668   | 210490  | KCNG4, WFDC1, BX648333, KIAA0703                  | 0           | 1 | 0.00 | 0.00 |
| 18p#200815_200887 | 18 | 20959062-2890931    | 795026  | TTTL4, KNTC2, BC006008, CR627458, AB014550, EMIL  | 0           | 1 | 0.00 | 0.00 |
| 18p#200894_200896 | 18 | 2959042-2972968     | 13927   | LPIN2                                             | 0           | 1 | 0.00 | 0.00 |
| 16q#189136_189146 | 16 | 45210248-45282215   | 71968   | SHCBP1, VPS35, ORC6L                              | 0           | 1 | 0.00 | 0.00 |
| 16q#189147_189172 | 16 | 45283842-45481020   | 197179  | ORC6L, MLCK, LOC388272, GPT2                      | 0           | 1 | 0.00 | 0.00 |
| 11q#148225_148233 | 11 | 106361961-106512080 | 150120  | GUCY1A2                                           | 0           | 1 | 0.00 | 0.00 |
| 11q#148244_148310 | 11 | 106729616-107415990 | 686375  | 2, ALKBH8, ELMOD1, SLN, SLC35F2, AK128062, RAB3   | 0           | 1 | 0.00 | 0.00 |
| 11q#148325_148345 | 11 | 107563991-107768905 | 204915  | NPAT, ATM, C11orf65                               | 0           | 1 | 0.00 | 0.00 |
| 11q#148352_148409 | 11 | 107848918-108447458 | 598541  | KDEL2, EXPH5, AB014524, DDX10, AY662656           | 0           | 1 | 0.00 | 0.00 |
| 13q#165571_165585 | 13 | 57155074-57452720   | 297647  | PCDH17                                            | 0           | 1 | 0.00 | 0.00 |
| 9q#123594_123610  | 9  | 92899302-92998221   | 98920   | SUSD3, C9orf89, NINJ1                             | 0           | 1 | 0.00 | 0.00 |
| 9p#119492_119521  | 9  | 10387996-11027444   | 639449  | AB211400                                          | 0           | 1 | 0.00 | 0.00 |
| 9p#119653_119659  | 9  | 13832546-14015665   | 183120  |                                                   | 0           | 1 | 0.00 | 0.00 |
| 9p#119700_119701  | 9  | 14496695-14513940   | 17246   |                                                   | 0           | 1 | 0.00 | 0.00 |
| 9p#119921_119934  | 9  | 17032766-17185824   | 153059  | CR623494, BX647069                                | 0           | 1 | 0.00 | 0.00 |
| 13q#165481_165492 | 13 | 55073966-55385025   | 311060  |                                                   | 0           | 1 | 0.00 | 0.00 |
| 13q#165500_165501 | 13 | 55574094-55598876   | 24783   |                                                   | 0           | 1 | 0.00 | 0.00 |
| 13q#165515_165557 | 13 | 55885543-56946097   | 1060555 | BC043197                                          | 0           | 1 | 0.00 | 0.00 |
| 11p#140274_140324 | 11 | 9024893-9456746     | 431854  | SCUBE2, RAB6IP1, TMEM41B, IPO7, ZNF143            | 0           | 1 | 0.00 | 0.00 |
| 14q#174780_174793 | 14 | 73643704-73736057   | 92354   | C14orf46, AK055422                                | 0           | 1 | 0.00 | 0.00 |
| 14q#174794_174800 | 14 | 73745970-73789919   | 43950   | CHX10                                             | Inf         | 1 | 0.02 | 0.00 |
| 14q#174842_174860 | 14 | 74081165-74232998   | 151834  | LTP2, KIAA0317                                    | 0           | 1 | 0.00 | 0.00 |
| 14q#174861_174986 | 14 | 74237320-75275305   | 1037986 | 1, PGF, EIF2B2, AK123455, MLH3, ACYP1, C14orf140, | 0           | 1 | 0.00 | 0.00 |
| 14q#175095_175098 | 14 | 76401532-76423332   | 21801   | C14orf166B                                        | 0           | 1 | 0.00 | 0.00 |
| 13q#163973_163983 | 13 | 38860327-38928126   | 67800   | LHFP                                              | 0           | 1 | 0.00 | 0.00 |
| 13q#164029_164106 | 13 | 39280897-40344231   | 1063335 | AY116215, AY116214, FOXO1A, MRPS31, SLC25A15,     | 0           | 1 | 0.00 | 0.00 |
| 16q#189780_189782 | 16 | 54022330-54048949   | 26620   | AL832088                                          | 0           | 1 | 0.00 | 0.00 |
| 9q#123196_123330  | 9  | 88075873-89907163   | 1831291 | K129921, SHC3, CKS2, SECISBP2, C9orf164, AK09080  | 0           | 1 | 0.00 | 0.00 |
| 9q#123375_123377  | 9  | 90615087-90637927   | 22841   |                                                   | 0           | 1 | 0.00 | 0.00 |
| 9q#123529_123556  | 9  | 92281548-92530367   | 248820  | RP11-19J3.3, IPPK, AF338194                       | 0           | 1 | 0.00 | 0.00 |
| 9q#123557_123564  | 9  | 92551282-92609199   | 57918   | AF338194, BICD2                                   | 0           | 1 | 0.00 | 0.00 |
| 9q#123747_123860  | 9  | 94507950-95757696   | 1249747 | 9orf3, FANCC, PTCH, AB189436, AF170307, LOC37574  | 0           | 1 | 0.00 | 0.00 |
| 9q#124338_124511  | 9  | 100847507-103208471 | 2360965 | ALDOB, C9orf125, BC033550, RNF20, GRIN3A, BC038   | 0           | 1 | 0.00 | 0.00 |
| 9q#124623_124627  | 9  | 104889518-105049662 | 160145  |                                                   | 0           | 1 | 0.00 | 0.00 |
| 11p#139633_139651 | 11 | 4116424-4403382     | 286959  | RRM1, TRIM21                                      | 0           | 1 | 0.00 | 0.00 |
| 6q#88278_88281    | 6  | 92859798-92949118   | 89321   |                                                   | 0           | 1 | 0.00 | 0.00 |
| 12p#153248_153278 | 12 | 26948220-27289478   | 341259  | 2orf11, FGFR1OP2, AL117608, TMTSF3, SURB7, STK3   | 0           | 1 | 0.00 | 0.00 |
| 12p#153293_153304 | 12 | 27460094-27574310   | 114217  | ARNTL2, AF256215, BC043511, PPFIBP1               | 0           | 1 | 0.00 | 0.00 |
| 12p#153325_153327 | 12 | 27741774-27753481   | 11708   | REP15                                             | 0           | 1 | 0.00 | 0.00 |
| 12p#153328_153333 | 12 | 27760469-27808436   | 47968   | MRPS35                                            | 0           | 1 | 0.00 | 0.00 |
| 6q#93539_93541    | 6  | 163163589-163176852 | 13264   | PACRG                                             | 0           | 1 | 0.00 | 0.00 |
| 13q#163749_163750 | 13 | 36320415-36325577   | 5163    | SMAD9                                             | 0           | 1 | 0.00 | 0.00 |
| 13q#163823_163888 | 13 | 37160116-37984038   | 823923  | TRPC4, CR627261, UFM1                             | 0           | 1 | 0.00 | 0.00 |
| 13q#167810_167885 | 13 | 93832633-94503369   | 670737  | DCT, TGDS, GPR180, BC063871, SOX21, AK055459, E   | 0           | 1 | 0.00 | 0.00 |
| 11q#148410_148458 | 11 | 108475868-109492437 | 1016570 | LOC399947, AK095101                               | 0           | 1 | 0.00 | 0.00 |
| 11q#148518_148533 | 11 | 110131657-110387630 | 255974  |                                                   | 0           | 1 | 0.00 | 0.00 |
| 11q#148705_148830 | 11 | 112120611-113514392 | 1393782 | 2, ANKK1, DRD2, TMPRSS5, ZW10, USP28, HTR3B, H    | 0           | 1 | 0.00 | 0.00 |
| 11q#148844_148921 | 11 | 113641683-114680884 | 1039202 | BC071695, C11orf71, RBM7, AB209753, REXO2, FAM    | 0           | 1 | 0.00 | 0.00 |
| 11q#148939_149114 | 11 | 114839357-117251488 | 2412132 | 2, BC039721, SIDT2, TAGLN, PCSK7, DKFZp547C195,   | 0           | 1 | 0.00 | 0.00 |
| 11q#149133_149281 | 11 | 117422097-118469869 | 1047773 | G, UBE4A, ATP5L, AK126838, MLL, AF272378, TMEM2   | 0           | 1 | 0.00 | 0.00 |
| 11q#146782_146793 | 11 | 86857690-87165464   | 307775  |                                                   | 0.692294348 | 1 | 0.02 | 0.00 |
| 13q#163245_163358 | 13 | 31320000-32191014   | 871015  | 035084, FRY, BRCA2, CG018, AL049787, LOC88523, P  | 0           | 1 | 0.00 | 0.00 |

|                   |    |                     |         |                                                     |     |   |      |      |
|-------------------|----|---------------------|---------|-----------------------------------------------------|-----|---|------|------|
| 13q#163724_163733 | 13 | 36043538-36176908   | 133371  | LOC400120                                           | 0   | 1 | 0.00 | 0.00 |
| 11q#148182_148190 | 11 | 105824405-106063405 | 239001  | AK022090, GUCY1A2                                   | 0   | 1 | 0.00 | 0.00 |
| 11q#148191_148202 | 11 | 106075469-106155356 | 79888   | GUCY1A2                                             | Inf | 1 | 0.02 | 0.00 |
| 16q#189125_189127 | 16 | 45115167-45138443   | 23277   | FLJ43980                                            | Inf | 1 | 0.02 | 0.00 |
| 16q#189128_189135 | 16 | 45145393-45199742   | 54350   | FLJ43980, SHCBP1                                    | 0   | 1 | 0.00 | 0.00 |
| 9p#119156_119157  | 9  | 6089101-6132532     | 43432   |                                                     | Inf | 1 | 0.02 | 0.00 |
| 9p#119300_119307  | 9  | 8084096-8307431     | 223336  | PTPRD                                               | Inf | 1 | 0.02 | 0.00 |
| 9p#119334_119352  | 9  | 8556794-8699809     | 143016  | PTPRD                                               | Inf | 1 | 0.02 | 0.00 |
| 11p#139507_139512 | 11 | 2729017-2790052     | 61036   | KCNQ1                                               | 0   | 1 | 0.00 | 0.00 |
| 16q#192561_192587 | 16 | 85897636-86096935   | 199300  | AK026130, FBXO31, MAP1LC3B, ZCCHC14                 | 0   | 1 | 0.00 | 0.00 |
| 18p#200752_200770 | 18 | 1264754-1462313     | 197560  | C18orf2, AK057505                                   | 0   | 1 | 0.00 | 0.00 |
| 13q#165475_165480 | 13 | 54876985-55035594   | 158610  |                                                     | 0   | 1 | 0.00 | 0.00 |
| 13q#165586_165591 | 13 | 57484503-57628677   | 144175  |                                                     | 0   | 1 | 0.00 | 0.00 |
| 9p#119320_119328  | 9  | 8435549-8494552     | 59004   | PTPRD                                               | Inf | 1 | 0.02 | 0.00 |
| 9p#119353_119427  | 9  | 8708615-9487845     | 779231  | PTPRD, AB211400                                     | 0   | 1 | 0.00 | 0.00 |
| 9p#119522_119584  | 9  | 11076096-12611421   | 1535326 |                                                     | 0   | 1 | 0.00 | 0.00 |
| 9p#119621_119638  | 9  | 13152889-13342703   | 189815  | MPDZ, AB210041                                      | 0   | 1 | 0.00 | 0.00 |
| 9p#119648_119652  | 9  | 13628428-13797331   | 168904  |                                                     | 0   | 1 | 0.00 | 0.00 |
| 11p#139454_139468 | 11 | 2138247-2282963     | 144717  | INS, TH, ASCL2, AB029488, TSPAN32                   | 0   | 1 | 0.00 | 0.00 |
| 16q#192293_192314 | 16 | 83016621-83207066   | 190446  | KIAA0703, KIAA1609, COTL1                           | 0   | 1 | 0.00 | 0.00 |
| 9p#121238_121253  | 9  | 34986075-35074232   | 88158   | DNAJB5, AK056829, MGC41945, VCP, FANCG              | Inf | 1 | 0.02 | 0.00 |
| 9q#123565_123583  | 9  | 92616400-92795708   | 179309  | AF338194, ANKRD19, BC028712, ZNF484, BC032429       | 0   | 1 | 0.00 | 0.00 |
| 9q#123611_123737  | 9  | 93015843-94423007   | 1407165 | RX1, BC031969, PTPDC1, BC045813, AK093956, ZNF176   | 0   | 1 | 0.00 | 0.00 |
| 9q#123745_123746  | 9  | 94489080-94496742   | 7663    |                                                     | 0   | 1 | 0.00 | 0.00 |
| 5q#73796_73803    | 5  | 92928025-92972432   | 44408   | AK124699, BC042879, NR2F1                           | 0   | 1 | 0.00 | 0.00 |
| 13q#164895_164904 | 13 | 48184076-48347983   | 163908  |                                                     | 0   | 1 | 0.00 | 0.00 |
| 13q#165502_165514 | 13 | 55619315-55871001   | 251687  |                                                     | 0   | 1 | 0.00 | 0.00 |
| 13q#165594_165596 | 13 | 57676988-57721946   | 44959   | AK124674                                            | 0   | 1 | 0.00 | 0.00 |
| 11q#148037_148056 | 11 | 104063199-104383036 | 319838  | AY358222, BC032472, CASP4, CASP5                    | 0   | 1 | 0.00 | 0.00 |
| 11q#148203_148224 | 11 | 106170815-106354686 | 183872  | GUCY1A2                                             | 0   | 1 | 0.00 | 0.00 |
| 11q#148234_148243 | 11 | 10655823-106723664  | 167842  | CWF19L2                                             | 0   | 1 | 0.00 | 0.00 |
| 11q#148346_148351 | 11 | 107782670-107838552 | 55883   | C11orf65                                            | 0   | 1 | 0.00 | 0.00 |
| 9p#121666_121667  | 9  | 39355550-39666978   | 311429  | CNTNAP3, AK127145                                   | 0   | 1 | 0.00 | 0.00 |
| 11p#139607_139620 | 11 | 3873242-3995545     | 122304  | STIM1                                               | 0   | 1 | 0.00 | 0.00 |
| 11p#140211_140273 | 11 | 8536031-9008088     | 472058  | 8, RPL27A, AK125453, ST5, C11orf17, C11orf16, ASCL3 | 0   | 1 | 0.00 | 0.00 |
| 11p#140325_140339 | 11 | 9466411-9589139     | 122729  | ZNF143, WEE1                                        | 0   | 1 | 0.00 | 0.00 |
| 9p#119459_119491  | 9  | 9953296-10371182    | 417887  | AB211400                                            | 0   | 1 | 0.00 | 0.00 |
| 9q#121694_121706  | 9  | 64139100-67731088   | 3591989 | BC110369, CR615666, AK057820                        | 0   | 1 | 0.00 | 0.00 |
| 17p#193025_193067 | 17 | 1092254-1448996     | 356743  | USC5, YWHAE, AK056769, CRK, MYO1C, SKIP, PITPN      | 0   | 1 | 0.00 | 0.00 |
| 9p#120947_120974  | 9  | 32398614-32598748   | 200135  | ACO1, DDX58, TOPORS, NDUFB6                         | 0   | 1 | 0.00 | 0.00 |
| 13q#163129_163146 | 13 | 29990502-30125423   | 134922  | AK122825, USPL1                                     | 0   | 1 | 0.00 | 0.00 |
| 9q#123331_123374  | 9  | 89955045-90560461   | 605417  | BC040625, DIRAS2                                    | 0   | 1 | 0.00 | 0.00 |
| 9q#123381_123395  | 9  | 90651357-90866848   | 215492  | SYK, CR620154                                       | 0   | 1 | 0.00 | 0.00 |
| 9q#123511_123514  | 9  | 92142929-92166070   | 23142   | NOL8                                                | 0   | 1 | 0.00 | 0.00 |
| 9q#123515_123528  | 9  | 92172229-92277015   | 104787  | RP11-19J3.3                                         | 0   | 1 | 0.00 | 0.00 |
| 9q#124530_124590  | 9  | 103635923-104557192 | 921270  | AK125887, SMC2L1, OR13F1, OR13C4                    | 0   | 1 | 0.00 | 0.00 |
| 9q#124601_124622  | 9  | 104624905-104848708 | 223804  | ABCA1                                               | 0   | 1 | 0.00 | 0.00 |
| 9q#124628_124638  | 9  | 105077700-105157738 | 80039   | SLC44A1                                             | 0   | 1 | 0.00 | 0.00 |
| 11p#139562_139563 | 11 | 3320321-3328001     | 7681    |                                                     | 0   | 1 | 0.00 | 0.00 |
| 11p#139577_139579 | 11 | 3634836-3645703     | 10868   | ART1, CHRNA10                                       | 0   | 1 | 0.00 | 0.00 |
| 11p#139621_139632 | 11 | 4005781-4106925     | 101145  | STIM1, RRM1                                         | 0   | 1 | 0.00 | 0.00 |
| 11p#139652_139853 | 11 | 4413091-5676158     | 1263068 | Y1, HBB, HBD, AY034471, CR621032, HBE1, BC015537,   | 0   | 1 | 0.00 | 0.00 |
| 13q#163567_163722 | 13 | 34742174-35997237   | 1255064 | MKL1, SOHLH2, AK023568, BC037403, SPG20, AK057      | 0   | 1 | 0.00 | 0.00 |
| 11q#149282_149317 | 11 | 118469915-118675936 | 206022  | 28572, TMEM24, MIZF, ABCG4, NOD9, PDZD3, LOC28      | 0   | 1 | 0.00 | 0.00 |
| 13q#163889_163898 | 13 | 37986076-38049166   | 63091   | BC040923                                            | 0   | 1 | 0.00 | 0.00 |

|                   |    |                     |         |                                                     |             |   |      |      |
|-------------------|----|---------------------|---------|-----------------------------------------------------|-------------|---|------|------|
| 13q#168201_168228 | 13 | 97524911-97753831   | 228921  | FARP1                                               | 0           | 1 | 0.00 | 0.00 |
| 13q#168238_168252 | 13 | 97809618-97902804   | 93187   | FARP1, STK24                                        | 0           | 1 | 0.00 | 0.00 |
| 6q#93527_93538    | 6  | 163064588-163155995 | 91408   | PARK2, PACRG                                        | 0           | 1 | 0.00 | 0.00 |
| 13q#163934_163972 | 13 | 38425740-38851031   | 425292  | STOML3, C13orf23, LOC387921, LHFP                   | 0           | 1 | 0.00 | 0.00 |
| 13q#163984_164028 | 13 | 38936399-39269516   | 333118  | LHFP, COG6, AB032960                                | 0           | 1 | 0.00 | 0.00 |
| 13q#167656_167703 | 13 | 92654560-93021962   | 367403  | AF111178, GPC6                                      | 0           | 1 | 0.00 | 0.00 |
| 13q#167795_167809 | 13 | 93718594-93818010   | 99417   | GPC6                                                | 0           | 1 | 0.00 | 0.00 |
| 13q#163240_163244 | 13 | 31274329-31311750   | 37422   | RXFP2                                               | 0           | 1 | 0.00 | 0.00 |
| 13q#163359_163566 | 13 | 32204292-34729320   | 2525029 | BX641164, BC024029, KL, STARD13, BX647695, RFC3     | 0           | 1 | 0.00 | 0.00 |
| 9p#119268_119275  | 9  | 7356869-7495835     | 138967  |                                                     | 0           | 1 | 0.00 | 0.00 |
| 9p#119276_119290  | 9  | 7534498-7806134     | 271637  |                                                     | Inf         | 1 | 0.02 | 0.00 |
| 9p#119291_119299  | 9  | 7817345-8055192     | 237848  |                                                     | Inf         | 1 | 0.02 | 0.00 |
| 9p#121441_121493  | 9  | 36553862-37119325   | 565464  | MELK, PAX5, CR608042, AK091718, ZCCHC7              | 0           | 1 | 0.00 | 0.00 |
| 11p#139513_139530 | 11 | 2797512-2906298     | 108787  | J251642, KCNQ1DN, CDKN1C, SLC22A18AS, SLC22A1       | 0           | 1 | 0.00 | 0.00 |
| 11q#148133_148181 | 11 | 105215323-105796100 | 580778  | A4, AK095313, KIAA1826, KBTBD3, AASDHPPT, BC034     | 0           | 1 | 0.00 | 0.00 |
| 11q#148459_148517 | 11 | 109508531-110122767 | 614237  | AB096241, AB096242, RDX, L26953, AK124179, FDX1,    | 0           | 1 | 0.00 | 0.00 |
| 11q#148534_148535 | 11 | 110434442-110472521 | 38080   |                                                     | 0           | 1 | 0.00 | 0.00 |
| 11q#148571_148704 | 11 | 110867726-112094047 | 1226322 | 11orf52, BC048294, DIXDC1, DLAT, LOC120379, CR62    | 0           | 1 | 0.00 | 0.00 |
| 11q#148831_148843 | 11 | 113527297-113635783 | 108487  | ZBTB16, BC000234                                    | 0           | 1 | 0.00 | 0.00 |
| 11q#149318_149331 | 11 | 118685474-118752828 | 67355   | MCAM, RNF26, C1QTNF5, MFRP, USP2                    | 0           | 1 | 0.00 | 0.00 |
| 11q#149392_149398 | 11 | 119588838-119636539 | 47702   | OAF, POU2F3                                         | 0           | 1 | 0.00 | 0.00 |
| 11q#150601_150664 | 11 | 133292153-133886901 | 594749  | VPS26B, THYN1, ACAD8, BC011001, BC063875, LOC       | 0           | 1 | 0.00 | 0.00 |
| 11q#147527_147532 | 11 | 97536752-97698617   | 161866  |                                                     | 0.692294348 | 1 | 0.02 | 0.02 |
| 13q#165362_165450 | 13 | 52308598-54194238   | 1885641 | PCDH8, BC041838, OLFM4, AK057270, BC041877          | 0           | 1 | 0.00 | 0.00 |
| 13q#165592_165593 | 13 | 57641295-57659398   | 18104   | AK124674                                            | 0           | 1 | 0.00 | 0.00 |
| 13q#165641_165647 | 13 | 58887644-59042843   | 155200  |                                                     | 0           | 1 | 0.00 | 0.00 |
| 13q#165709_165753 | 13 | 59622915-60205389   | 582475  | AY750055, TDRD3, BC041832                           | 0           | 1 | 0.00 | 0.00 |
| 13q#165799_165859 | 13 | 61369549-62920388   | 1550840 | BC037867                                            | 0           | 1 | 0.00 | 0.00 |
| 13q#165860_165873 | 13 | 62951424-63280448   | 329025  | AK097469                                            | 0           | 1 | 0.00 | 0.00 |
| 13q#165874_165882 | 13 | 63292992-63402101   | 109110  | AK098560                                            | Inf         | 1 | 0.02 | 0.00 |
| 13q#165883_165960 | 13 | 63439503-65524770   | 2085268 | AK057471                                            | 0           | 1 | 0.00 | 0.00 |
| 13q#169555_169679 | 13 | 113032131-114123908 | 1091778 | 1D2, TMCO3, TFDP1, ATP4B, GRK1, AK092053, FLJ44     | 0           | 1 | 0.00 | 0.00 |
| 9p#118648_118650  | 9  | 942275-954153       | 11879   | DMRT1                                               | 0           | 1 | 0.00 | 0.00 |
| 9p#118656_118692  | 9  | 986407-1447665      | 461259  | BC052949, DMRT2                                     | 0           | 1 | 0.00 | 0.00 |
| 9p#118747_118783  | 9  | 2109502-2572081     | 462580  | SMARCA2, AK092343                                   | 0           | 1 | 0.00 | 0.00 |
| 9p#119136_119155  | 9  | 5898765-6063001     | 164237  | MLANA, KIAA2026, BC108654, RANBP6                   | Inf         | 1 | 0.02 | 0.00 |
| 11p#139469_139506 | 11 | 2286966-2723363     | 436398  | TSPAN32, BC019904, CD81, TSSC4, TRPM5, KCNQ1        | 0           | 1 | 0.00 | 0.00 |
| 16q#192315_192401 | 16 | 83213063-84134045   | 920983  | P10, CRISPLD2, ZDHHC7, KIAA0513, FAM92B, BC0409     | 0           | 1 | 0.00 | 0.00 |
| 16q#192538_192560 | 16 | 85584293-85890731   | 306439  | AK128193, AK125749                                  | 0           | 1 | 0.00 | 0.00 |
| 11q#146889_146897 | 11 | 88374604-88446576   | 71973   | GRM5, BC031602                                      | 0           | 1 | 0.00 | 0.00 |
| 13q#164544_164820 | 13 | 44452780-47480427   | 3027648 | 7244, SPERT, LOC283514, AK074924, ZC3H13, CPB2,     | 0           | 1 | 0.00 | 0.00 |
| 13q#164886_164894 | 13 | 48059200-48180777   | 121578  | AY853711, CYSLTR2                                   | 0           | 1 | 0.00 | 0.00 |
| 13q#164959_165032 | 13 | 48831916-49351071   | 519156  | -, BX647518, SETDB2, PHF11, RCBTB1, ARL11, EBPL,    | 0           | 1 | 0.00 | 0.00 |
| 13q#165597_165607 | 13 | 57742016-57939368   | 197353  |                                                     | 0           | 1 | 0.00 | 0.00 |
| 13q#166113_166124 | 13 | 67342222-67677979   | 335758  |                                                     | 0           | 1 | 0.00 | 0.00 |
| 13q#166125_166569 | 13 | 67713256-74620168   | 6906913 | 25522, FLJ22624, KIAA1008, C13orf24, KLF5, KLF12, A | 0           | 1 | 0.00 | 0.00 |
| 13q#167357_167367 | 13 | 88783454-88959069   | 175616  |                                                     | 0           | 1 | 0.00 | 0.00 |
| 13q#169360_169470 | 13 | 110806089-112405995 | 1599907 | 51, CR627049, BC034786, BX649107, LOC122258, TUE    | 0           | 1 | 0.00 | 0.00 |
| 9p#119428_119458  | 9  | 9511545-9933399     | 421855  | AB211400                                            | 0           | 1 | 0.00 | 0.00 |
| 9p#119585_119620  | 9  | 12641199-13144810   | 503612  | X51420, TYRP1, C9orf150, MPDZ                       | 0           | 1 | 0.00 | 0.00 |
| 9p#119639_119647  | 9  | 13364245-13585914   | 221670  | AK123194                                            | 0           | 1 | 0.00 | 0.00 |
| 11p#139436_139437 | 11 | 1985731-1993223     | 7493    |                                                     | 0           | 1 | 0.00 | 0.00 |
| 9q#124646_124692  | 9  | 105225104-105600236 | 375133  | SLC44A1, AK124926, FSD1L, FCMD, TAL2, TMEM38B       | 0           | 1 | 0.00 | 0.00 |
| 9p#121093_121153  | 9  | 33813991-34306631   | 492641  | UBE2R2, UBAP2, WDR40A, UBAP1, C9orf48, AK001793     | Inf         | 1 | 0.02 | 0.00 |
| 9p#121254_121272  | 9  | 35080704-35227809   | 147106  | PIGO, STOML2, KIAA1539, UNC13B                      | Inf         | 1 | 0.02 | 0.00 |



|                   |    |                     |         |                                                   |             |   |      |      |
|-------------------|----|---------------------|---------|---------------------------------------------------|-------------|---|------|------|
| 9p#121273_121290  | 9  | 35233265-35381564   | 148300  | UNC13B                                            | Inf         | 1 | 0.02 | 0.00 |
| 9q#123739_123744  | 9  | 94449024-94483439   | 34416   | FBP1                                              | 0           | 1 | 0.00 | 0.00 |
| 12p#153140_153247 | 12 | 25740259-26940357   | 1200099 | AK090817, RASSF8, BHLHB3, BC041929, SSPN, ITPR2   | 0           | 1 | 0.00 | 0.00 |
| 12p#153305_153324 | 12 | 27581193-27737759   | 156567  | PPFIBP1                                           | 0           | 1 | 0.00 | 0.00 |
| 12p#153334_153444 | 12 | 27814255-29478053   | 1663799 | PTHLH, AK093152, CCDC91, AL136843, MLSTD1, ERG1   | 0           | 1 | 0.00 | 0.00 |
| 17p#193068_193093 | 17 | 1456417-1598054     | 141638  | BC071859, SCARF1, RILP, PRPF8, MGC14376, WDR81,   | 0           | 1 | 0.00 | 0.00 |
| 11p#139386_139435 | 11 | 1616917-1977551     | 360635  | HCCA2, LSP1, L38282, TNNT3, MRPL23, AK128774      | 0           | 1 | 0.00 | 0.00 |
| 13q#161968_161979 | 13 | 18402053-18481420   | 79368   | BC067875                                          | 0           | 1 | 0.00 | 0.00 |
| 13q#162035_162044 | 13 | 19039881-19115234   | 75354   | HSMPP8                                            | 0           | 1 | 0.00 | 0.00 |
| 13q#162928_162933 | 13 | 27857009-27892948   | 35940   | FLT1                                              | 0           | 1 | 0.00 | 0.00 |
| 9p#120937_120946  | 9  | 32195770-32385805   | 190036  | ACO1                                              | 0           | 1 | 0.00 | 0.00 |
| 9p#120975_120987  | 9  | 32607736-32757474   | 149739  | TAF1L, AK091653                                   | 0           | 1 | 0.00 | 0.00 |
| 9p#121399_121439  | 9  | 36130660-36470926   | 340267  | C9orf19, CCIN, CLTA, GNE, CR599555, RNF38         | 0           | 1 | 0.00 | 0.00 |
| 13q#163072_163080 | 13 | 29401973-29503706   | 101734  | LOC440131                                         | 0           | 1 | 0.00 | 0.00 |
| 13q#163126_163128 | 13 | 29962308-29980791   | 18484   | AK122825                                          | 0           | 1 | 0.00 | 0.00 |
| 13q#163147_163174 | 13 | 30130396-30405767   | 275372  | USPL1, ALOX5AP, AK093165, FLJ14834, C13orf26      | 0           | 1 | 0.00 | 0.00 |
| 13q#163175_163226 | 13 | 30412773-31148725   | 735953  | C13orf26, HSPH1, B3GALTL                          | 0           | 1 | 0.00 | 0.00 |
| 9q#121711_121712  | 9  | 68214035-68262931   | 48897   | PGM5                                              | 0           | 1 | 0.00 | 0.00 |
| 9q#124591_124600  | 9  | 104565171-104619243 | 54073   | NIPSNAP3A, NIPSNAP3B, BX647652                    | 0           | 1 | 0.00 | 0.00 |
| 9q#124639_124645  | 9  | 105172327-105215123 | 42797   | SLC44A1                                           | 0           | 1 | 0.00 | 0.00 |
| 11p#139564_139576 | 11 | 3338516-3625737     | 287222  | ZNF195, AK123648, AB231779, X89067, ART5, ART1    | 0           | 1 | 0.00 | 0.00 |
| 11p#139580_139606 | 11 | 3648961-3867001     | 218041  | CHRNA10, NUP98, AL096753, FRAG1, RHOG, STIM1      | 0           | 1 | 0.00 | 0.00 |
| 11p#140091_140123 | 11 | 7447053-7724398     | 277346  | AK128569, OLFML1, PPFIBP2, CYB5R2, OVCH2          | 0           | 1 | 0.00 | 0.00 |
| 11p#140136_140210 | 11 | 7834546-8528129     | 693584  | K093511, EIF3S5, BC027619, AK126895, TUB, AL83260 | 0           | 1 | 0.00 | 0.00 |
| 11p#140340_140355 | 11 | 9602017-9735929     | 133913  | SWAP70, AK090613                                  | 0           | 1 | 0.00 | 0.00 |
| 17p#193022_193024 | 17 | 1049874-1077585     | 27712   | AK026788                                          | 0           | 1 | 0.00 | 0.00 |
| 17p#193100_193169 | 17 | 1629728-2224307     | 594580  | 4, RPA1, RTN4RL1, DPH1, HIC1, SMG6, SRR, TSR1, R  | 0           | 1 | 0.00 | 0.00 |
| 17p#193470_193486 | 17 | 4652956-4761649     | 108694  | PLD2, MINK1, CHRNE                                | 0           | 1 | 0.00 | 0.00 |
| 17p#193523_193584 | 17 | 4966472-5438691     | 472220  | 78, UNQ5783, BC029580, RABEP1, NUP88, RPAIN, C10  | 0           | 1 | 0.00 | 0.00 |
| 17p#193782_193821 | 17 | 7312769-7537896     | 225128  | NP3, BC032613, EIF4A1, CD68, MPDU1, AK027742, FX  | 0           | 1 | 0.00 | 0.00 |
| 17p#193829_193841 | 17 | 7581046-7694679     | 113634  | DNHD3, BC067879, AB002344                         | 0           | 1 | 0.00 | 0.00 |
| 11q#149499_149584 | 11 | 120797009-122094261 | 1297253 | ORL1, BC040643, BC089451, AK091713, BRCC2, STS-   | 0           | 1 | 0.00 | 0.00 |
| 17p#192974_192977 | 17 | 656790-682147       | 25358   | NXN                                               | 0           | 1 | 0.00 | 0.00 |
| 6q#933503_93526   | 6  | 162832407-163053073 | 220667  | PARK2                                             | 0           | 1 | 0.00 | 0.00 |
| 11q#146794_146801 | 11 | 87224773-87390447   | 165675  |                                                   | 0.692294348 | 1 | 0.02 | 0.02 |
| 11q#146818_146832 | 11 | 87649398-87796201   | 146804  | CTSC                                              | Inf         | 1 | 0.02 | 0.00 |
| 11q#146869_146878 | 11 | 88191174-88281875   | 90702   | GRM5                                              | 0           | 1 | 0.00 | 0.00 |
| 13q#163899_163933 | 13 | 38073490-38412538   | 339049  | FREM2, BX640686                                   | 0           | 1 | 0.00 | 0.00 |
| 13q#164384_164416 | 13 | 42855888-43103924   | 248037  | PIG38                                             | 0           | 1 | 0.00 | 0.00 |
| 13q#164417_164458 | 13 | 43114392-43437060   | 322669  | PIG38, BC068521, FLJ31846, FLJ38725, BX538036     | 0           | 1 | 0.00 | 0.00 |
| 13q#167024_167059 | 13 | 80808027-81818065   | 1010039 |                                                   | 0           | 1 | 0.00 | 0.00 |
| 13q#167599_167655 | 13 | 91997620-92615127   | 617508  | GPC5                                              | 0           | 1 | 0.00 | 0.00 |
| 13q#167704_167794 | 13 | 93035386-93713008   | 677623  | GPC6                                              | 0           | 1 | 0.00 | 0.00 |
| 13q#168229_168237 | 13 | 97760117-97804621   | 44505   | FARP1                                             | 0           | 1 | 0.00 | 0.00 |
| 13q#168253_168462 | 13 | 97920354-99676991   | 1756638 | 7488, PHGDHL1, BC043507, TM9SF2, BC041830, CLY4   | 0           | 1 | 0.00 | 0.00 |
| 13q#168473_168498 | 13 | 99764111-99955456   | 191346  | PCCA                                              | 0           | 1 | 0.00 | 0.00 |
| 13q#169154_169179 | 13 | 108666575-109218663 | 552089  | IRS2                                              | 0           | 1 | 0.00 | 0.00 |
| 11q#149332_149350 | 11 | 11875983-118951364  | 193382  | AK097820, THY1                                    | 0           | 1 | 0.00 | 0.00 |
| 11q#149358_149360 | 11 | 119035833-119056313 | 20481   | PVRL1                                             | 0           | 1 | 0.00 | 0.00 |
| 11q#149399_149406 | 11 | 119645108-119703967 | 58860   | POUF3, TMEM136                                    | 0           | 1 | 0.00 | 0.00 |
| 16q#189118_189123 | 16 | 45018886-45097874   | 78989   | FLJ43980                                          | Inf         | 1 | 0.02 | 0.00 |
| 17p#192911_192913 | 17 | 148092-167891       | 19800   | RPH3AL                                            | 0           | 1 | 0.00 | 0.00 |
| 17p#192978_192995 | 17 | 691777-831438       | 139662  | NXN, AF151908                                     | 0           | 1 | 0.00 | 0.00 |
| 17p#193170_193235 | 17 | 2231046-2816939     | 585894  | T, LOC284009, METT10D, PAFAH1B1, KIAA0664, AK12   | 0           | 1 | 0.00 | 0.00 |
| 17p#193299_193369 | 17 | 3333472-3850369     | 516898  | NS, TAX1BP3, TMEM93, P2RX5, ITGAE, AK056724, HSA  | 0           | 1 | 0.00 | 0.00 |

|                   |    |                     |         |                                                   |     |   |      |      |
|-------------------|----|---------------------|---------|---------------------------------------------------|-----|---|------|------|
| 17p#193384_193431 | 17 | 3991768-4393321     | 401554  | CYB5D2, ANKFY1, UBE2G1, MGC29671, BC041772, M     | 0   | 1 | 0.00 | 0.00 |
| 17p#193854_193864 | 17 | 7774808-7863033     | 88226   | TRAPPC1, CNTR0B, AK095413, GUCY2D                 | 0   | 1 | 0.00 | 0.00 |
| 11q#148057_148062 | 11 | 104386618-104414971 | 28354   | CASP1, BC062327                                   | 0   | 1 | 0.00 | 0.00 |
| 11q#150680_150704 | 11 | 134113671-134432324 | 318654  | AK125040                                          | 0   | 1 | 0.00 | 0.00 |
| 19p#209111_209121 | 19 | 23776775-23904614   | 127840  | LOC388524, AK124278, AX721133, AK125686           | 0   | 1 | 0.00 | 0.00 |
| 12p#152500_152606 | 12 | 18052896-19350995   | 1298100 | FLJ22655, PIK3C2G, PLCZ1, CAPZA3, PLEKHA5         | 0   | 1 | 0.00 | 0.00 |
| 12p#152722_152728 | 12 | 21026066-21087702   | 61637   | LST-3TM12                                         | 0   | 1 | 0.00 | 0.00 |
| 13q#165686_165708 | 13 | 59445925-59613216   | 167292  | DIAPH3, AY750055                                  | 0   | 1 | 0.00 | 0.00 |
| 11q#148107_148123 | 11 | 104965726-105118641 | 152916  | GRIA4                                             | 0   | 1 | 0.00 | 0.00 |
| 11q#148124_148132 | 11 | 105128915-105206648 | 77734   | GRIA4                                             | 0   | 1 | 0.00 | 0.00 |
| 9p#118651_118655  | 9  | 958751-980073       | 21323   | DMRT1, DMRT3                                      | 0   | 1 | 0.00 | 0.00 |
| 9p#118713_118746  | 9  | 1728515-2100251     | 371737  | SMARCA2                                           | 0   | 1 | 0.00 | 0.00 |
| 13q#164511_164543 | 13 | 44061141-44445308   | 384168  | NUFIP1                                            | 0   | 1 | 0.00 | 0.00 |
| 13q#164821_164885 | 13 | 47484876-48036764   | 551889  | CR590107, MED4, ITM2B, BC039553, RB1, RCBTB2, A   | 0   | 1 | 0.00 | 0.00 |
| 13q#165033_165050 | 13 | 49362628-49490781   | 128154  | BC030655, C13orf1, AF529010, RFP2, KCNRG          | 0   | 1 | 0.00 | 0.00 |
| 13q#165120_165361 | 13 | 50081240-52304884   | 2223645 | 707, AK098719, CCDC70, ATP7B, ALG11, UTP14C, NEA  | 0   | 1 | 0.00 | 0.00 |
| 13q#165608_165640 | 13 | 57994454-58855211   | 860758  |                                                   | 0   | 1 | 0.00 | 0.00 |
| 13q#165648_165673 | 13 | 59080220-59337364   | 257145  | BC041395, AY750055, DIAPH3                        | 0   | 1 | 0.00 | 0.00 |
| 13q#165681_165684 | 13 | 59405784-59433773   | 27990   | DIAPH3                                            | 0   | 1 | 0.00 | 0.00 |
| 13q#165754_165798 | 13 | 60239303-61326385   | 1087083 | AK097816, PCDH20, AL833830                        | 0   | 1 | 0.00 | 0.00 |
| 13q#165961_166112 | 13 | 65586024-67302822   | 1716799 | PCDH9                                             | 0   | 1 | 0.00 | 0.00 |
| 13q#169471_169554 | 13 | 112410779-113025750 | 614972  | 035340, AB002360, MCF2L, F7, F10, PROZ, PCID2, CU | 0   | 1 | 0.00 | 0.00 |
| 11q#148536_148570 | 11 | 110493185-110853423 | 360239  | FLJ45803, CR936778, BC042557, POU2AF1, BC0220     | 0   | 1 | 0.00 | 0.00 |
| 11q#149381_149391 | 11 | 119494966-119578488 | 83523   | TRIM29                                            | 0   | 1 | 0.00 | 0.00 |
| 11q#150389_150600 | 11 | 131043938-133285989 | 2242052 | 358331, HNT, OPCML, BC043577, SPATA19, LOC2837    | 0   | 1 | 0.00 | 0.00 |
| 11q#150665_150679 | 11 | 133902455-134105480 | 203026  |                                                   | 0   | 1 | 0.00 | 0.00 |
| 8p#107663_107674  | 8  | 1718037-1815615     | 97579   | CLN8, AF123758, ARHGEF10                          | 0   | 1 | 0.00 | 0.00 |
| 8p#108126_108127  | 8  | 6929691-7040655     | 110965  |                                                   | 0   | 1 | 0.00 | 0.00 |
| 9p#119121_119135  | 9  | 5760926-5890266     | 129341  | KIAA1432, AB037853, KIAA1815, MLANA               | 0   | 1 | 0.00 | 0.00 |
| 9p#121664_121665  | 9  | 39167063-39244388   | 77326   | CNTNAP3                                           | 0   | 1 | 0.00 | 0.00 |
| 12p#153043_153056 | 12 | 24512704-24617133   | 104430  | SOX5, FLJ32894                                    | 0   | 1 | 0.00 | 0.00 |
| 9p#121676_121682  | 9  | 42913008-43378400   | 465393  | BC031626                                          | Inf | 1 | 0.02 | 0.00 |
| 10q#133103_133108 | 10 | 69572840-69627307   | 54468   | FLJ14437                                          | 0   | 1 | 0.00 | 0.00 |
| 10q#133115_133172 | 10 | 69673626-70152268   | 478643  | JFY2, D42046, BC023330, SLC25A16, CXXC6, AK1234   | 0   | 1 | 0.00 | 0.00 |
| 10q#133179_133233 | 10 | 70217724-70666729   | 449006  | DX1, DDX50, DDX21, KIAA1279, PRG1, VPS26A, SUPV   | 0   | 1 | 0.00 | 0.00 |
| 15q#183020_183025 | 15 | 70153589-70190216   | 36628   | MYO9A                                             | Inf | 1 | 0.02 | 0.00 |
| 17p#193000_193021 | 17 | 855232-1039386      | 184155  | ABR, AF151908                                     | 0   | 1 | 0.00 | 0.00 |
| 17p#193094_193099 | 17 | 1602400-1625560     | 23161   | SERPINF2, SERPINF1                                | 0   | 1 | 0.00 | 0.00 |
| 9p#121084_121092  | 9  | 33757107-33809068   | 51962   | X71345, CR598614, UBE2R2                          | 0   | 1 | 0.00 | 0.00 |
| 9p#121291_121298  | 9  | 35394384-35461372   | 66989   | UNC13B, LOC158381, BC031276                       | Inf | 1 | 0.02 | 0.00 |
| 9p#121371_121398  | 9  | 35914336-36122502   | 208167  | RECK                                              | 0   | 1 | 0.00 | 0.00 |
| 13q#161980_162034 | 13 | 18489690-19027781   | 538092  | AL832753, TUBA2, BC036210, TPTE2                  | 0   | 1 | 0.00 | 0.00 |
| 13q#162180_162184 | 13 | 20282022-20304514   | 22493   | XPO4                                              | 0   | 1 | 0.00 | 0.00 |
| 13q#163088_163125 | 13 | 29645741-29955293   | 309553  | KATNAL1, CR598049, HMGB1, AK122825                | 0   | 1 | 0.00 | 0.00 |
| 13q#162256_162297 | 13 | 20953472-21439928   | 486457  | EFHA1, FGF9                                       | 0   | 1 | 0.00 | 0.00 |
| 13q#163045_163071 | 13 | 29070732-29391348   | 320617  | UBL3, BC039674                                    | 0   | 1 | 0.00 | 0.00 |
| 13q#163081_163085 | 13 | 29534886-29570053   | 35168   |                                                   | 0   | 1 | 0.00 | 0.00 |
| 13q#163227_163239 | 13 | 31169202-31263982   | 94781   | RXFP2                                             | 0   | 1 | 0.00 | 0.00 |
| 11p#140124_140135 | 11 | 7734916-7824039     | 89124   | OR5P2, OR5P3                                      | 0   | 1 | 0.00 | 0.00 |
| 11p#140356_140365 | 11 | 9741313-9823879     | 82567   | CR598129, SBF2                                    | 0   | 1 | 0.00 | 0.00 |
| 11p#140366_140414 | 11 | 9831751-10298310    | 466560  | SBF2, ADM                                         | 0   | 1 | 0.00 | 0.00 |
| 17p#193370_193383 | 17 | 3858602-3984937     | 126336  | ZZEF1                                             | 0   | 1 | 0.00 | 0.00 |
| 17p#193432_193469 | 17 | 4399862-4647203     | 247342  | ALOX15, BC010457, PELP1, ARRB2, CXCL16, ZMYND     | 0   | 1 | 0.00 | 0.00 |
| 17p#193487_193522 | 17 | 4768709-4962176     | 193468  | ENO3, SPAG7, CAMTA2, INCA1, KIF1C, BC040307, G    | 0   | 1 | 0.00 | 0.00 |
| 17p#193585_193781 | 17 | 5455352-7307920     | 1852569 | GR2, ASGR1, DLG4, ACADVL, DVL2, PHF23, GABARAF    | 0   | 1 | 0.00 | 0.00 |

|                   |    |                     |         |                                                   |             |   |      |      |
|-------------------|----|---------------------|---------|---------------------------------------------------|-------------|---|------|------|
| 17p#193842_193853 | 17 | 7700707-7767844     | 67138   | LSMD1, CYB5D1, AK095413, CHD3, KCNAB3             | 0           | 1 | 0.00 | 0.00 |
| 9p#120988_120997  | 9  | 32769204-32945205   | 176002  | LOC401498, AK124533                               | 0           | 1 | 0.00 | 0.00 |
| 9p#121494_121556  | 9  | 37124532-37637220   | 512689  | CCHC7, GRHPR, ZBTB5, POLR1E, FBXO10, BX64109,     | 0           | 1 | 0.00 | 0.00 |
| 9p#121557_121579  | 9  | 37650527-37832184   | 181658  | FRMPD1, BX641092, RG9MTD3, EXOSC3, WDR32          | Inf         | 1 | 0.02 | 0.00 |
| 11q#149351_149357 | 11 | 118965939-119026316 | 60378   | FLJ45300                                          | 0           | 1 | 0.00 | 0.00 |
| 11q#149489_149498 | 11 | 120678087-120770782 | 92696   | SC5DL                                             | 0           | 1 | 0.00 | 0.00 |
| 11q#149585_149624 | 11 | 122104446-122441909 | 337464  | STS-1, CRTAM, C11orf63, HSPA8                     | 0           | 1 | 0.00 | 0.00 |
| 11q#146802_146817 | 11 | 87425444-87622892   | 197449  | RAB38                                             | 0.692294348 | 1 | 0.02 | 0.02 |
| 13q#168499_168556 | 13 | 99960668-100546021  | 585354  | AK091974, AK095850, TMTC4, AK056409, AK025806, V  | 0           | 1 | 0.00 | 0.00 |
| 13q#168717_168827 | 13 | 101747270-103076962 | 1329693 | 95660, CR614484, LOC93081, AK126341, KDELC1, BIV  | 0           | 1 | 0.00 | 0.00 |
| 11q#146833_146859 | 11 | 87819029-88093751   | 274723  | GRM5                                              | 0           | 1 | 0.00 | 0.00 |
| 11q#146866_146868 | 11 | 88167509-88182566   | 15058   | GRM5                                              | 0           | 1 | 0.00 | 0.00 |
| 11q#146879_146888 | 11 | 88287933-88367470   | 79538   | GRM5                                              | 0           | 1 | 0.00 | 0.00 |
| 13q#164459_164461 | 13 | 43450534-43498245   | 47712   | AK001941                                          | 0           | 1 | 0.00 | 0.00 |
| 13q#166570_166662 | 13 | 74653790-75399022   | 745233  | TBC1D4, COMMD6, UCHL3, LMO7, AK092698             | 0           | 1 | 0.00 | 0.00 |
| 13q#166998_167023 | 13 | 80195093-80777898   | 582806  |                                                   | 0           | 1 | 0.00 | 0.00 |
| 13q#167060_167103 | 13 | 81857106-83082562   | 1225457 |                                                   | 0           | 1 | 0.00 | 0.00 |
| 13q#167104_167110 | 13 | 83090186-83153897   | 63712   |                                                   | 0           | 1 | 0.00 | 0.00 |
| 13q#167133_167165 | 13 | 83631560-84315130   | 683571  |                                                   | 0           | 1 | 0.00 | 0.00 |
| 13q#167224_167225 | 13 | 85710179-85717371   | 7193    |                                                   | 0           | 1 | 0.00 | 0.00 |
| 13q#167325_167356 | 13 | 87945910-88758397   | 812488  |                                                   | 0           | 1 | 0.00 | 0.00 |
| 13q#167368_167369 | 13 | 88981583-88999824   | 18242   |                                                   | 0           | 1 | 0.00 | 0.00 |
| 13q#167383_167391 | 13 | 89307100-89487222   | 180123  |                                                   | 0           | 1 | 0.00 | 0.00 |
| 13q#167404_167598 | 13 | 89751955-91988441   | 2236487 | BC038529, AK055781, AB176708, AY927632, GPC5      | 0           | 1 | 0.00 | 0.00 |
| 13q#168463_168472 | 13 | 99687774-99753179   | 65406   | PCCA                                              | 0           | 1 | 0.00 | 0.00 |
| 5q#74657_74715    | 5  | 107075980-107679343 | 603364  | FBXL17                                            | 0           | 1 | 0.00 | 0.00 |
| 9p#121672_121673  | 9  | 40520747-41009567   | 488821  | ZNF658                                            | 0           | 1 | 0.00 | 0.00 |
| 11q#148063_148106 | 11 | 104419583-104947983 | 528401  | COP1, AB231723, INCA, AK128199, ICEBERG           | 0           | 1 | 0.00 | 0.00 |
| 11q#149361_149380 | 11 | 119065080-119487625 | 422546  | PVRL1, TRIM29                                     | 0           | 1 | 0.00 | 0.00 |
| 11q#149407_149451 | 11 | 119709631-120275561 | 565931  | ARHGEF12, GRIK4                                   | 0           | 1 | 0.00 | 0.00 |
| 13q#165051_165119 | 13 | 49494436-50071345   | 576910  | AF380424, AJ412057, AJ412029                      | 0           | 1 | 0.00 | 0.00 |
| 13q#166709_166832 | 13 | 76405399-77395079   | 989681  | 3XL3, MYCBP2, BC047536, SCEL, FLJ30046, BC031243  | 0           | 1 | 0.00 | 0.00 |
| 11p#139532_139555 | 11 | 2917540-3176491     | 258952  | NAP1L4, CAR5, OSBPL5                              | 0           | 1 | 0.00 | 0.00 |
| 11p#139556_139558 | 11 | 3186925-3200180     | 13256   | C11orf36                                          | 0           | 1 | 0.00 | 0.00 |
| 13q#164462_164510 | 13 | 43549172-44051985   | 502814  | BC000868, C13orf21, BC025370, TSC22D1, BC040675   | 0           | 1 | 0.00 | 0.00 |
| 13q#166663_166675 | 13 | 75420994-75742412   | 321419  |                                                   | 0           | 1 | 0.00 | 0.00 |
| 13q#166913_166966 | 13 | 78408543-79438387   | 1029845 | C13orf10, AK002196, NDFIP2, BC036310              | 0           | 1 | 0.00 | 0.00 |
| 13q#166978_166997 | 13 | 79785321-80156410   | 371090  | SPRY2, BC042526                                   | 0           | 1 | 0.00 | 0.00 |
| 16q#192402_192411 | 16 | 84144083-84236081   | 91999   | BC037556, KIAA0182                                | 0           | 1 | 0.00 | 0.00 |
| 16q#192497_192502 | 16 | 85115077-85143300   | 28224   | MTHFS                                             | 0           | 1 | 0.00 | 0.00 |
| 16q#192594_192595 | 16 | 86185082-86191651   | 6570    |                                                   | 0           | 1 | 0.00 | 0.00 |
| 16q#192674_192724 | 16 | 87104337-87452812   | 348476  | D, BX640980, SNAI3, RNF166, LOC348180, FAM38A, FL | 0           | 1 | 0.00 | 0.00 |
| 16q#192734_192756 | 16 | 87532981-87739874   | 206894  | CBFA2T3, LOC197322                                | 0           | 1 | 0.00 | 0.00 |
| 11p#139360_139377 | 11 | 1456763-1570581     | 113819  | HCCA2                                             | 0           | 1 | 0.00 | 0.00 |
| 11q#146313_146314 | 11 | 81784449-81807001   | 22553   | BC041900                                          | 0.692294348 | 1 | 0.02 | 0.02 |
| 11q#146319_146324 | 11 | 81941752-82037377   | 95626   |                                                   | Inf         | 1 | 0.02 | 0.00 |
| 13q#162880_162915 | 13 | 27499339-27773138   | 273800  | FLT3, PAN3, X51602                                | 0           | 1 | 0.00 | 0.00 |
| 13q#162922_162927 | 13 | 27802399-27849608   | 47210   | FLT1                                              | 0           | 1 | 0.00 | 0.00 |
| 5q#79166_79429    | 5  | 160494371-166121450 | 5627080 | 5ABRA1, GABRG2, CCNG1, BX538290, NUDCD2, HMM      | 0           | 1 | 0.00 | 0.00 |
| 5q#80422_80584    | 5  | 177536704-178959732 | 1423029 | 633, ZNF354A, BC024222, ZNF354B, ZFP2, AK055745,  | 0           | 1 | 0.00 | 0.00 |
| 5q#80585_80754    | 5  | 178969417-180500219 | 1530803 | 49, KIAA0676, AK021734, RNF130, AK128590, RASGE   | 0           | 1 | 0.00 | 0.00 |
| 12p#152729_152807 | 12 | 21092993-21726313   | 633321  | CO1B1, SLCO1A2, FLJ22028, RECQL, GOL11B, C12orf   | 0           | 1 | 0.00 | 0.00 |
| 12p#153006_153010 | 12 | 24174625-24213161   | 38537   | SOX5                                              | 0           | 1 | 0.00 | 0.00 |
| 11p#139340_139352 | 11 | 1296424-1405565     | 109142  | BRSK2                                             | 0           | 1 | 0.00 | 0.00 |
| 13q#162185_162194 | 13 | 20315979-20380382   | 64404   | XPO4, AB051508                                    | 0           | 1 | 0.00 | 0.00 |

|                   |    |                     |         |                                                   |  |             |   |      |      |
|-------------------|----|---------------------|---------|---------------------------------------------------|--|-------------|---|------|------|
| 13q#162345_162364 | 13 | 22517382-22751534   | 234153  | SGCG                                              |  | 0           | 1 | 0.00 | 0.00 |
| 13q#162421_162498 | 13 | 23322450-24006978   | 684529  | 87911, FLJ46358, BX648445, SPATA13, C1QTNF9, BC0  |  | 0           | 1 | 0.00 | 0.00 |
| 13q#162916_162921 | 13 | 27781051-27795987   | 14937   | FLT1                                              |  | 0           | 1 | 0.00 | 0.00 |
| 13q#162198_162205 | 13 | 20435485-20497234   | 61750   | LATS2                                             |  | 0           | 1 | 0.00 | 0.00 |
| 13q#162206_162255 | 13 | 20507495-20947389   | 439895  | 007357, SAP18, C13orf3, MRP63, AK093279, BC034944 |  | 0           | 1 | 0.00 | 0.00 |
| 13q#162298_162308 | 13 | 21486550-21626755   | 140206  | AK054845                                          |  | 0           | 1 | 0.00 | 0.00 |
| 13q#163086_163087 | 13 | 29589008-29621894   | 32887   |                                                   |  | 0           | 1 | 0.00 | 0.00 |
| 9p#121033_121083  | 9  | 33245269-33745748   | 500480  | FX1, AQP3, AK128272, NOL6, LOC441459, BC038293, C |  | 0           | 1 | 0.00 | 0.00 |
| 9p#121360_121370  | 9  | 35819796-35885092   | 65297   | C9orf127, BC043384, AL832569                      |  | 0           | 1 | 0.00 | 0.00 |
| 11p#139167_139183 | 11 | 182372-263345       | 80974   | ODF3, BET1L, RIC8A, SIRT3, PSMD13                 |  | 0           | 1 | 0.00 | 0.00 |
| 17p#192996_192999 | 17 | 834395-849124       | 14730   | AF151908, TIMM22                                  |  | 0           | 1 | 0.00 | 0.00 |
| 17p#193865_193874 | 17 | 7866843-7929248     | 62406   | ALOX15B, ALOX12B                                  |  | 0           | 1 | 0.00 | 0.00 |
| 17p#193883_193894 | 17 | 7988446-8032457     | 44012   | PER1, BC028207, VAMP2, TMEM107, C17orf59          |  | 0           | 1 | 0.00 | 0.00 |
| 17p#193929_193951 | 17 | 8220100-8415534     | 195435  | BC024723, RPL26, NDEL1, MYH10                     |  | 0           | 1 | 0.00 | 0.00 |
| 17p#193952_193960 | 17 | 8427179-8513477     | 86299   | MYH10                                             |  | 0           | 1 | 0.00 | 0.00 |
| 9p#120998_121026  | 9  | 32955637-33168547   | 212911  | CR602856, DNAJA1, AK001732, SMU1, BC045773, B4    |  | 0           | 1 | 0.00 | 0.00 |
| 9p#121299_121303  | 9  | 35467102-35501557   | 34456   | BC031276, RUSC2                                   |  | Inf         | 1 | 0.02 | 0.00 |
| 9p#121580_121607  | 9  | 37847269-38054161   | 206893  | WDR32, BC094765, MCART1, SHB                      |  | Inf         | 1 | 0.02 | 0.00 |
| 16q#192777_192796 | 16 | 87885515-88048464   | 162950  | ANKRD11                                           |  | 0           | 1 | 0.00 | 0.00 |
| 16q#192834_192898 | 16 | 88284047-88690615   | 406569  | F25, AK022609, MC1R, TUBB3, FLJ20186, MGC16385,   |  | 0           | 1 | 0.00 | 0.00 |
| 11q#146860_146865 | 11 | 88108535-88158658   | 50124   | GRM5                                              |  | 0           | 1 | 0.00 | 0.00 |
| 13q#167182_167223 | 13 | 84839648-85647108   | 807461  | SLITRK6                                           |  | 0           | 1 | 0.00 | 0.00 |
| 13q#167370_167382 | 13 | 89021461-89296313   | 274853  |                                                   |  | 0           | 1 | 0.00 | 0.00 |
| 13q#167392_167403 | 13 | 89503507-89727565   | 224059  | BC043442                                          |  | 0           | 1 | 0.00 | 0.00 |
| 11q#149452_149488 | 11 | 120282139-120669720 | 387582  | GRIK4, LRRRC35, TECTA, SC5DL                      |  | 0           | 1 | 0.00 | 0.00 |
| 11q#150195_150388 | 11 | 128595658-131034778 | 2439121 | K648817, APLP2, ST14, BTBD15, FLJ34521, ADAMTS8,  |  | 0           | 1 | 0.00 | 0.00 |
| 12p#153057_153136 | 12 | 24620897-25646400   | 1025504 | 71, AK056255, LRMP, CASC1, LOC144363, KRAS, BC0   |  | 0           | 1 | 0.00 | 0.00 |
| 12p#153137_153139 | 12 | 25666871-25718176   | 51306   |                                                   |  | 0           | 1 | 0.00 | 0.00 |
| 12p#153445_153454 | 12 | 29489556-29572313   | 82758   | OVCH1, TMTC1                                      |  | 0           | 1 | 0.00 | 0.00 |
| 8p#107659_107662  | 8  | 1690133-1711072     | 20940   | CLN8                                              |  | 0           | 1 | 0.00 | 0.00 |
| 13q#166676_166708 | 13 | 75762353-76400250   | 637898  | KCTD12, BC106717                                  |  | 0           | 1 | 0.00 | 0.00 |
| 13q#166833_166842 | 13 | 77403072-77480120   | 77049   | EDNRB, BX647243                                   |  | 0           | 1 | 0.00 | 0.00 |
| 13q#166843_166909 | 13 | 77495156-78295379   | 800224  | BX647243, AK095779, POU4F1, C13orf7               |  | 0           | 1 | 0.00 | 0.00 |
| 13q#166910_166912 | 13 | 78316463-78375944   | 59482   |                                                   |  | 0           | 1 | 0.00 | 0.00 |
| 17p#194671_194687 | 17 | 17339599-17521080   | 181482  | RASD1, PEMT                                       |  | 0           | 1 | 0.00 | 0.00 |
| 17p#194708_194749 | 17 | 17702287-18052856   | 350570  | 1L2, LRRRC48, ATPAF2, C17orf39, DRG2, MYO15A, ALK |  | 0           | 1 | 0.00 | 0.00 |
| 5q#74716_74983    | 5  | 107689236-111193154 | 3503919 | AK093222, FLJ43080, BC042563, LOC91137, TSLP, WD  |  | 0           | 1 | 0.00 | 0.00 |
| 10q#132978_133102 | 10 | 68427967-69565149   | 1137183 | TNNA3, DNAJC12, SIRT1, HERC4, BX648564, FLJ1443   |  | 0           | 1 | 0.00 | 0.00 |
| 10q#133109_133114 | 10 | 69636648-69666530   | 28883   | FLJ14437, AL834247, ATOH7                         |  | 0           | 1 | 0.00 | 0.00 |
| 15q#183012_183019 | 15 | 70079134-70145334   | 66201   | MYO9A                                             |  | Inf         | 1 | 0.02 | 0.00 |
| 11q#146261_146262 | 11 | 80643631-80687877   | 44247   |                                                   |  | 0.692294348 | 1 | 0.02 | 0.02 |
| 16q#192596_192621 | 16 | 86195276-86444567   | 249292  | JPH3, AK001742, KLHDC4, SLC7A5                    |  | 0           | 1 | 0.00 | 0.00 |
| 16q#192656_192666 | 16 | 86874711-87033241   | 158531  | AB058761                                          |  | 0           | 1 | 0.00 | 0.00 |
| 16q#192667_192673 | 16 | 87034408-87097642   | 63235   | AB058761, ZFFM1                                   |  | 0           | 1 | 0.00 | 0.00 |
| 12p#152439_152448 | 12 | 16430087-16537884   | 107798  | AK058030                                          |  | 0           | 1 | 0.00 | 0.00 |
| 12p#152449_152499 | 12 | 16564024-18028394   | 1464371 | LMO3                                              |  | 0           | 1 | 0.00 | 0.00 |
| 12p#152620_152621 | 12 | 19476466-19483375   | 6910    | CR599308                                          |  | 0           | 1 | 0.00 | 0.00 |
| 12p#152634_152721 | 12 | 19659449-21015114   | 1355666 | PDE3A, SLCO1C1, LST-3TM12                         |  | 0           | 1 | 0.00 | 0.00 |
| 19p#209097_209110 | 19 | 23627675-23760865   | 133191  | BC032394, ZNF675, CR624679, ZNF681, LOC388524     |  | 0           | 1 | 0.00 | 0.00 |
| 19p#209122_209125 | 19 | 23924855-23995836   | 70982   | AK125686                                          |  | 0           | 1 | 0.00 | 0.00 |
| 16q#192757_192768 | 16 | 87744023-87813104   | 69082   | 2, AK094020, AK130578, CDH15, AL137382, AK098143  |  | 0           | 1 | 0.00 | 0.00 |
| 11q#146376_146382 | 11 | 82574161-82644381   | 70221   | PCF11, AL359570, ANKRD42, BC062729                |  | 0.688886232 | 1 | 0.03 | 0.05 |
| 1p#21_30          | 1  | 925445-976539       | 51095   | NOC2L, KLHL17, PLEKHN1, BX648399                  |  | 0           | 1 | 0.00 | 0.00 |
| 1p#83_90          | 1  | 1299091-1536363     | 237273  | CPSF3L, DVL1, MXRA8, BC094869, AF343078, ATAD3A   |  | 0           | 1 | 0.00 | 0.00 |
| 1p#31_82          | 1  | 980650-1295513      | 314864  | 8833, TLL10, BC027945, SDF4, B3GALT6, UBE2J2, S   |  | 0           | 1 | 0.00 | 0.00 |

|                   |    |                     |         |                                                   |             |   |      |      |
|-------------------|----|---------------------|---------|---------------------------------------------------|-------------|---|------|------|
| 2q#37089_37093    | 2  | 233071655-233099777 | 28123   | ALPP, BC067110, ALPPL2                            | 0           | 1 | 0.00 | 0.00 |
| 5q#71027_71098    | 5  | 55014733-55804912   | 790180  | AK128743, DDX4, IL31RA, AF106913, IL6ST, FLJ11795 | 0           | 1 | 0.00 | 0.00 |
| 5q#71112_71135    | 5  | 56136766-56302854   | 166089  | AF042838, BX537527, MGC33648, MIER3               | 0           | 1 | 0.00 | 0.00 |
| 5q#71201_71328    | 5  | 57776821-58976411   | 1199591 | PLK2, FLJ33641, RAB3C, PDE4D, L20969              | 0           | 1 | 0.00 | 0.00 |
| 5q#71342_71392    | 5  | 59100711-59742776   | 642066  | L20969, AF536976, AY245866                        | 0           | 1 | 0.00 | 0.00 |
| 5q#71393_71400    | 5  | 59751869-59811717   | 59849   | AY245866                                          | Inf         | 1 | 0.02 | 0.00 |
| 5q#71401_71519    | 5  | 59819751-61174468   | 1354718 | 8, DEPDC1B, ELOVL7, ERCC8, mimitin, AF264626, ABC | 0           | 1 | 0.00 | 0.00 |
| 11p#141301_141344 | 11 | 20389359-20827835   | 438477  | PRMT3, SLC6A5, AK096599, NELL1                    | 0           | 1 | 0.00 | 0.00 |
| 13q#162195_162197 | 13 | 20399951-20426686   | 26736   |                                                   | 0           | 1 | 0.00 | 0.00 |
| 1p#13_16          | 1  | 886543-903344       | 16802   | BC025320, SAMD11                                  | 0           | 1 | 0.00 | 0.00 |
| 3p#44027_44166    | 3  | 67210062-69036296   | 1826235 | SUCLG2, BC038210, AL832184, FAM19A1, FAM19A4      | 0           | 1 | 0.00 | 0.00 |
| 17p#194001_194017 | 17 | 8909788-9046786     | 136999  | NTN1                                              | 0           | 1 | 0.00 | 0.00 |
| 5q#79430_79825    | 5  | 166161434-170530919 | 4369486 | 648891, PANK3, BC062365, SLIT3, CCDC99, DOCK2, f  | 0           | 1 | 0.00 | 0.00 |
| 5q#80207_80208    | 5  | 175707932-175712048 | 4117    | KIAA1191                                          | 0           | 1 | 0.00 | 0.00 |
| 5q#80209_80421    | 5  | 175717047-177527050 | 1810004 | AK131469, FGFR4, NSD1, RAB24, PX19, MXD3, AK12    | 0           | 1 | 0.00 | 0.00 |
| 12p#152808_152829 | 12 | 21743894-21950275   | 206382  | KCNJ8, BX640893, ABCC9                            | 0           | 1 | 0.00 | 0.00 |
| 12p#153011_153042 | 12 | 24221619-24505688   | 283970  | SOX5                                              | 0           | 1 | 0.00 | 0.00 |
| 19q#209775_209778 | 19 | 41330875-41353735   | 22861   | CAPNS1, COX7A1                                    | 0           | 1 | 0.00 | 0.00 |
| 19q#209779_209785 | 19 | 41365158-41421559   | 56402   | ZNF565, AK057290, ZNF146                          | 0           | 1 | 0.00 | 0.00 |
| 17p#193875_193876 | 17 | 7933425-7941494     | 8070    | ALOXE3                                            | 0           | 1 | 0.00 | 0.00 |
| 17p#193895_193928 | 17 | 8037561-8215422     | 177862  | 5, C17orf68, PFAS, SLC25A35, ARHGEF15, ODF4, AK0  | 0           | 1 | 0.00 | 0.00 |
| 9p#121027_121032  | 9  | 33194393-33238467   | 44075   | SPINK4                                            | 0           | 1 | 0.00 | 0.00 |
| 9p#121304_121310  | 9  | 35507216-35554371   | 47156   | RUSC2                                             | Inf         | 1 | 0.02 | 0.00 |
| 9p#121311_121359  | 9  | 35564165-35816173   | 252009  | 3, CA9, TPM2, TLN1, CREB3, GBA2, D87447, BC01425  | 0           | 1 | 0.00 | 0.00 |
| 4p#55037_55185    | 4  | 12094486-14523850   | 2429365 | AK027027, RAB28, BAPX1, FAM44A, AK091889, AK055   | 0           | 1 | 0.00 | 0.00 |
| 4p#55186_55206    | 4  | 14532029-14717890   | 185862  | BC036758, BC039114, CPEB2                         | 0           | 1 | 0.00 | 0.00 |
| 4p#55207_55342    | 4  | 14729990-16284880   | 1554891 | FBL5, BC048993, BST1, CD38, FGFBP1, KSP37, PRO    | 0           | 1 | 0.00 | 0.00 |
| 4p#55343_55489    | 4  | 16300591-18429153   | 2128563 | QDPR, LAP3, MED28, BX648830, AB033102, FLJ2028    | 0           | 1 | 0.00 | 0.00 |
| 10p#128064_128073 | 10 | 334839-409325       | 74487   | DIP2C                                             | 0           | 1 | 0.00 | 0.00 |
| 11p#142754_142760 | 11 | 42966804-43170043   | 203240  |                                                   | 0           | 1 | 0.00 | 0.00 |
| 15q#181827_181863 | 15 | 59780972-60132291   | 351320  | VPS13C                                            | Inf         | 1 | 0.02 | 0.00 |
| 19p#209077_209096 | 19 | 23333072-23616442   | 283371  | AK002041, ZNF91, BC041431, BC032394               | 0           | 1 | 0.00 | 0.00 |
| 17p#194795_194807 | 17 | 18703327-18823751   | 120425  | PRPSAP2, SLC5A10                                  | 0           | 1 | 0.00 | 0.00 |
| 5q#71329_71341    | 5  | 58982091-59092107   | 110017  | L20969                                            | 0           | 1 | 0.00 | 0.00 |
| 16q#192622_192633 | 16 | 86462708-86587949   | 125242  | CA5A, BANP                                        | 0           | 1 | 0.00 | 0.00 |
| 16q#192769_192776 | 16 | 87817666-87878491   | 60826   | FLJ1875, ANKRD11                                  | 0           | 1 | 0.00 | 0.00 |
| 2q#36100_36253    | 2  | 221935223-223996524 | 2061302 | PAX3, FLJ32447, SGPP2, AK096323, FARSLB, MOGA     | 0           | 1 | 0.00 | 0.00 |
| 5q#74984_75021    | 5  | 111222378-111706424 | 484047  | AK096057, TIGA1, EPB41L4A                         | Inf         | 1 | 0.02 | 0.00 |
| 5q#75022_75118    | 5  | 111712018-112722554 | 1010537 | AK002097, APC, SRP19, REEP5, DCP2, BX537952, MC   | 0           | 1 | 0.00 | 0.00 |
| 5q#75771_75784    | 5  | 122893715-123014943 | 121229  | CSNK1G3                                           | 0           | 1 | 0.00 | 0.00 |
| 5q#75805_75911    | 5  | 123706830-125903500 | 2196671 | ZNF608, BC103742, BC039471, GRAMD3                | 0           | 1 | 0.00 | 0.00 |
| 5q#75932_76164    | 5  | 126099815-128784056 | 2684242 | 3, MEGF10, LOC133619, BC036629, SLC12A2, FBN2, f  | 0           | 1 | 0.00 | 0.00 |
| 5q#76652_76654    | 5  | 133856121-133881668 | 25548   |                                                   | 0           | 1 | 0.00 | 0.00 |
| 5q#76655_76662    | 5  | 133893905-133955484 | 61580   | PHF15, BC012749                                   | 0           | 1 | 0.00 | 0.00 |
| 14q#170029_170034 | 14 | 21400478-21438763   | 38286   | BC063432                                          | 0           | 1 | 0.00 | 0.00 |
| 14q#170036_170037 | 14 | 21457258-21464983   | 7726    | BC063432                                          | 0           | 1 | 0.00 | 0.00 |
| 15q#182445_182450 | 15 | 64642344-64673628   | 31285   | LCTL, BC016970                                    | Inf         | 1 | 0.02 | 0.00 |
| 15q#182451_182458 | 15 | 64694251-64771361   | 77111   | BC016970                                          | 0           | 1 | 0.00 | 0.00 |
| 15q#183401_183410 | 15 | 73283536-73387220   | 103685  | C15orf39                                          | 0           | 1 | 0.00 | 0.00 |
| 15q#183411_183417 | 15 | 73392942-73419685   | 26744   | COMMD4                                            | 0           | 1 | 0.00 | 0.00 |
| 15q#183418_183430 | 15 | 73424569-73490984   | 66416   | NEIL1, MAN2C1, SIN3A                              | 0           | 1 | 0.00 | 0.00 |
| 15q#185768_185776 | 15 | 98145502-98228802   | 83301   | C15orf51, LOC400464                               | Inf         | 1 | 0.02 | 0.00 |
| 11p#139307_139339 | 11 | 1058706-1290685     | 231980  | M22406, MUC2, AF015521, U95031, TOLLIP            | 0           | 1 | 0.00 | 0.00 |
| 11q#146365_146374 | 11 | 82450878-82558668   | 107791  | RAB30, PCF11                                      | 0.692294348 | 1 | 0.02 | 0.00 |
| 3p#43826_43848    | 3  | 64325557-64583188   | 257632  | ADAMTS9                                           | 0           | 1 | 0.00 | 0.00 |

|                   |    |                     |         |                                                   |     |   |      |      |
|-------------------|----|---------------------|---------|---------------------------------------------------|-----|---|------|------|
| 3p#44500_44530    | 3  | 73535935-73807455   | 271521  | PDZRN3                                            | 0   | 1 | 0.00 | 0.00 |
| 18p#201922_201928 | 18 | 14941276-15370683   | 429408  | AK126243, AK097631                                | 0   | 1 | 0.00 | 0.00 |
| 4q#59053_59065    | 4  | 76006396-76173092   | 166697  | BC011618, BTC                                     | Inf | 1 | 0.02 | 0.00 |
| 5q#80755_80764    | 5  | 180509401-180558993 | 49593   | TRIM7                                             | 0   | 1 | 0.00 | 0.00 |
| 5q#80765_80780    | 5  | 180562472-180644869 | 82398   | TRIM7, TRIM41, GNB2L1, TRIM52, BC016291           | 0   | 1 | 0.00 | 0.00 |
| 11p#143178_143220 | 11 | 47439574-47742844   | 303271  | AK127967, KBTBD4, NDUFS3, C1QTNF4, MTCH2, AGB     | 0   | 1 | 0.00 | 0.00 |
| 11p#143221_143226 | 11 | 47750332-47791044   | 40713   | NUP160                                            | 0   | 1 | 0.00 | 0.00 |
| 12p#152430_152438 | 12 | 16355638-16417959   | 62322   | MGST1, BC056683                                   | 0   | 1 | 0.00 | 0.00 |
| 12p#152839_153005 | 12 | 22095784-24164840   | 2069057 | CR623725, KIAA0528, ETNK1, AK094733, AK058180, 4  | 0   | 1 | 0.00 | 0.00 |
| 19p#209126_209137 | 19 | 24020549-24157914   | 137366  | AK092150, ZNF254, ZNF539                          | 0   | 1 | 0.00 | 0.00 |
| 1p#17_20          | 1  | 907406-919130       | 11725   | SAMD11                                            | 0   | 1 | 0.00 | 0.00 |
| 2q#36607_36637    | 2  | 228126578-228355318 | 228741  | HRB, DKFZp547H025                                 | 0   | 1 | 0.00 | 0.00 |
| 2q#36809_36810    | 2  | 230400865-230408015 | 7151    | DNER                                              | 0   | 1 | 0.00 | 0.00 |
| 2q#36811_36821    | 2  | 230421470-230524358 | 102889  | TRIP12                                            | 0   | 1 | 0.00 | 0.00 |
| 2q#36822_36955    | 2  | 230531214-231862981 | 1331768 | C93349, SP100, AF255565, AK055016, CAB39, ITM2C,  | 0   | 1 | 0.00 | 0.00 |
| 5q#71136_71200    | 5  | 56319922-57771661   | 1451740 | GPBP1, AK021736, DKFZp686D0972                    | 0   | 1 | 0.00 | 0.00 |
| 10q#133511_133525 | 10 | 73262822-73435758   | 172937  | PSAP, CHST3                                       | 0   | 1 | 0.00 | 0.00 |
| 10q#133719_133732 | 10 | 75069380-75203300   | 133921  | SYNPO2L, AB188489, AF086522, AK094774, SEC24C     | 0   | 1 | 0.00 | 0.00 |
| 11p#141287_141300 | 11 | 20175524-20383027   | 207504  | HTATIP2, PRMT3                                    | 0   | 1 | 0.00 | 0.00 |
| 11p#141379_141406 | 11 | 21129417-21421001   | 291585  | NELL1                                             | 0   | 1 | 0.00 | 0.00 |
| 11p#141407_141426 | 11 | 21428591-21698008   | 269418  | NELL1                                             | Inf | 1 | 0.02 | 0.00 |
| 15q#182610_182650 | 15 | 66203654-66492450   | 288797  | S1, CALML4, CLN6, AK124013, FEM1B, AB007856, ITG  | 0   | 1 | 0.00 | 0.00 |
| 15q#183340_183351 | 15 | 72862257-72918586   | 56330   | CSK, LMAN1L, CPLX3, BC036117                      | 0   | 1 | 0.00 | 0.00 |
| 19p#206591_206598 | 19 | 1169409-1209185     | 39777   | STK11, C19orf26, AK024373, ATP5D, MIDN            | 0   | 1 | 0.00 | 0.00 |
| 3p#43728_43739    | 3  | 63159890-63353806   | 193917  | CR936762                                          | 0   | 1 | 0.00 | 0.00 |
| 3p#43849_44026    | 3  | 64594538-67169450   | 2574913 | K057923, BC040632, CR617380, MAG1, AK092495, SL   | 0   | 1 | 0.00 | 0.00 |
| 3p#44167_44284    | 3  | 69043159-70508118   | 1464960 | TMF1, UBE1C, AF147337, ARL6IP5, LMOD3, AB02323    | 0   | 1 | 0.00 | 0.00 |
| 9q#127955_128007  | 9  | 137654537-138061528 | 406992  | YND19, ARRD1, C9orf37, AK025002, BC047504, EHM1   | 0   | 1 | 0.00 | 0.00 |
| 15q#178510_178524 | 15 | 27099669-27196868   | 97200   | APBA2                                             | 0   | 1 | 0.00 | 0.00 |
| 15q#178525_178535 | 15 | 27206203-27285386   | 79184   | AB011146                                          | 0   | 1 | 0.00 | 0.00 |
| 15q#178550_178570 | 15 | 27444148-27770395   | 326248  | BX641061, BC034566                                | 0   | 1 | 0.00 | 0.00 |
| 17p#194018_194025 | 17 | 9061381-9120619     | 59239   | NTN1, BC092429, STX8                              | 0   | 1 | 0.00 | 0.00 |
| 17p#193877_193882 | 17 | 7945504-7978064     | 32561   | ALOXE3, HES7                                      | 0   | 1 | 0.00 | 0.00 |
| 11p#139354_139359 | 11 | 1417454-1447721     | 30268   | BRSK2, AF020089, HCCA2                            | 0   | 1 | 0.00 | 0.00 |
| 17p#194668_194670 | 17 | 17321969-17336058   | 14090   | MED9                                              | 0   | 1 | 0.00 | 0.00 |
| 17p#194808_194811 | 17 | 18830350-18853954   | 23605   | SLC5A10                                           | 0   | 1 | 0.00 | 0.00 |
| 2q#36638_36801    | 2  | 228364741-230333659 | 1968919 | C19A3, CCL20, WDR69, SKIP, FLJ20701, BC024766, DN | 0   | 1 | 0.00 | 0.00 |
| 2q#36804_36808    | 2  | 230350935-230385971 | 35037   | DNER                                              | 0   | 1 | 0.00 | 0.00 |
| 11p#141427_141443 | 11 | 21727918-22193305   | 465388  | TMEM16E                                           | Inf | 1 | 0.02 | 0.00 |
| 11p#141444_141456 | 11 | 22204117-22328916   | 124800  | TMEM16E, SLC17A6                                  | 0   | 1 | 0.00 | 0.00 |
| 11p#141542_141620 | 11 | 24388057-25487271   | 1099215 | LUZP2                                             | 0   | 1 | 0.00 | 0.00 |
| 11p#141676_141702 | 11 | 26543451-26954172   | 410722  | TMEM16C, BC041454, SLC5A12                        | 0   | 1 | 0.00 | 0.00 |
| 4q#59414_59436    | 4  | 79717369-79914449   | 197081  | FRAS1, ANXA3                                      | 0   | 1 | 0.00 | 0.00 |
| 4q#59437_59455    | 4  | 79943281-80150928   | 207648  | BC044613, BC012545, BMP2K                         | 0   | 1 | 0.00 | 0.00 |
| 5q#77296_77335    | 5  | 139931398-140178290 | 246893  | 1580, NDUFA2, IK, AF182645, WDR55, DND1, HARS, H  | 0   | 1 | 0.00 | 0.00 |
| 5q#77343_77376    | 5  | 140213216-140439659 | 226444  | PCDHA1, PCDHB1                                    | 0   | 1 | 0.00 | 0.00 |
| 5q#77869_77888    | 5  | 146178757-146340546 | 161790  | PPP2R2B                                           | 0   | 1 | 0.00 | 0.00 |
| 5q#78132_78225    | 5  | 148726132-149473719 | 747588  | NK1A1, FLJ41603, PPARGC1B, BX537592, PDE6A, SL    | 0   | 1 | 0.00 | 0.00 |
| 5q#78306_78318    | 5  | 150039012-150133924 | 94913   | MYOZ3, L08442, RBM22, DCTN4                       | 0   | 1 | 0.00 | 0.00 |
| 5q#78335_78396    | 5  | 15031141-150899004  | 587864  | P1, ANXA6, CCDCG9, GM2A, SLC36A3, SLC36A2, AK0    | 0   | 1 | 0.00 | 0.00 |
| 5q#78656_78701    | 5  | 154231496-155202941 | 971446  | CNOT8, AL117665, GEMIN5, MRPL22, BC008431         | 0   | 1 | 0.00 | 0.00 |
| 5q#79162_79164    | 5  | 160346088-160425477 | 79390   |                                                   | 0   | 1 | 0.00 | 0.00 |
| 11p#142744_142753 | 11 | 42652428-42927255   | 274828  |                                                   | 0   | 1 | 0.00 | 0.00 |
| 11p#142761_142778 | 11 | 43203048-43385509   | 182462  | API5, TTC17                                       | 0   | 1 | 0.00 | 0.00 |
| 11p#143227_143245 | 11 | 47797605-48020469   | 222865  | NUP160, PTPRJ                                     | 0   | 1 | 0.00 | 0.00 |

|                   |    |                     |         |                                                       |     |   |      |      |
|-------------------|----|---------------------|---------|-------------------------------------------------------|-----|---|------|------|
| 11p#143246_143250 | 11 | 48029586-48065285   | 35700   | PTPRJ                                                 | 0   | 1 | 0.00 | 0.00 |
| 12p#151511_151534 | 12 | 7371504-7678669     | 307166  | CD163L1, CD163                                        | 0   | 1 | 0.00 | 0.00 |
| 12p#151616_151628 | 12 | 8493927-8581139     | 87213   | BC004857, CLEEC6A, CLEEC4D, CLEEC4E                   | 0   | 1 | 0.00 | 0.00 |
| 15q#183585_183608 | 15 | 74653507-74844770   | 191264  | ZNF291                                                | 0   | 1 | 0.00 | 0.00 |
| 15q#183996_183999 | 15 | 78289410-78343582   | 54173   | BC040586                                              | Inf | 1 | 0.02 | 0.00 |
| 15q#184140_184151 | 15 | 79606034-79876810   | 270777  | AK023763                                              | 0   | 1 | 0.00 | 0.00 |
| 19q#209138_209156 | 19 | 32545047-33356563   | 811517  | BC024732                                              | 0   | 1 | 0.00 | 0.00 |
| 4q#58490_58492    | 4  | 69812150-69834632   | 22483   |                                                       | 0   | 1 | 0.00 | 0.00 |
| 4q#58791_58801    | 4  | 72902749-73059667   | 156919  | GC, AK223458                                          | Inf | 1 | 0.02 | 0.00 |
| 5q#80086_80102    | 5  | 173526873-173967010 | 440138  | AK093208                                              | 0   | 1 | 0.00 | 0.00 |
| 5q#80109_80120    | 5  | 174087447-174278806 | 191360  | MSX2, FLJ16171                                        | 0   | 1 | 0.00 | 0.00 |
| 5q#80187_80206    | 5  | 175243441-175702837 | 459397  | CPLX2, BC052945, C5orf25                              | 0   | 1 | 0.00 | 0.00 |
| 10p#129666_129748 | 10 | 18802390-20271983   | 1469594 | CACNB2, NSUN6, ARL5B, BC014575, PLXDC2                | 0   | 1 | 0.00 | 0.00 |
| 10p#129749_129967 | 10 | 20282457-22745875   | 2463419 | 2, NEBL, FLJ45187, MLLT10, DNAJC1, COMMD3, BMI1,      | 0   | 1 | 0.00 | 0.00 |
| 19q#209786_209807 | 19 | 41430836-41658585   | 227750  | AK022329, KIAA1559, ZNF545, ZNF566                    | 0   | 1 | 0.00 | 0.00 |
| 20p#213574_213588 | 20 | 11465988-11763896   | 297909  |                                                       | 0   | 1 | 0.00 | 0.00 |
| 9p#121657_121659  | 9  | 38805416-39062288   | 256873  | CR615666, BX538190                                    | 0   | 1 | 0.00 | 0.00 |
| 16q#192634_192635 | 16 | 86599633-86610601   | 10969   | BANP                                                  | 0   | 1 | 0.00 | 0.00 |
| 3p#44458_44499    | 3  | 72956243-73522838   | 566596  | SHQ1, AK021574, PPP4R2, PDZRN3                        | 0   | 1 | 0.00 | 0.00 |
| 3p#44531_44542    | 3  | 73843065-74084646   | 241582  |                                                       | 0   | 1 | 0.00 | 0.00 |
| 9q#128023_128033  | 9  | 138192250-138275765 | 83516   | CACNA1B                                               | 0   | 1 | 0.00 | 0.00 |
| 2q#35440_35562    | 2  | 214900253-216205814 | 1305562 | SPAG16, BARD1, AK056813, ABCA12, ATIC, FN1            | 0   | 1 | 0.00 | 0.00 |
| 2q#35577_35673    | 2  | 216467424-217351283 | 883860  | 591, XRCC5, AK091571, MARCH4, AK023780, SMARCA        | 0   | 1 | 0.00 | 0.00 |
| 2q#35681_35741    | 2  | 217383272-218456647 | 1073376 | IGFBP5, TNPI1, AK024261, AK090954                     | 0   | 1 | 0.00 | 0.00 |
| 2q#36041_36099    | 2  | 220426763-221899667 | 1472905 | BC043385                                              | 0   | 1 | 0.00 | 0.00 |
| 4p#54923_55036    | 4  | 9741086-12058958    | 2317873 | 660, WDR1, AK093001, KIAA1729, MIST, HS3ST1, AK1      | 0   | 1 | 0.00 | 0.00 |
| 4p#55490_55491    | 4  | 18455667-18489927   | 34261   |                                                       | 0   | 1 | 0.00 | 0.00 |
| 4p#55492_55702    | 4  | 18515858-21331016   | 2815159 | SLIT2, AK098692, MGC29898, KCNIP4                     | 0   | 1 | 0.00 | 0.00 |
| 4p#55703_55706    | 4  | 21342669-21361634   | 18966   | KCNIP4                                                | 0   | 1 | 0.00 | 0.00 |
| 4p#55707_55714    | 4  | 21367802-21430628   | 62827   | KCNIP4                                                | 0   | 1 | 0.00 | 0.00 |
| 4p#55715_55771    | 4  | 21436360-22239861   | 803502  | KCNIP4, GPR125                                        | 0   | 1 | 0.00 | 0.00 |
| 5q#75119_75440    | 5  | 112733695-118064251 | 5330557 | 5GT1B, MGC39633, FEM1C, TICAM2, CDO1, ATG12, A        | 0   | 1 | 0.00 | 0.00 |
| 5q#75685_75753    | 5  | 121967305-122700068 | 732764  | BC043373, SNX2, SNX24, AK056733, PPIC, AF272898       | 0   | 1 | 0.00 | 0.00 |
| 5q#76165_76260    | 5  | 128798539-130386660 | 1588122 | ADAMTS19, CSS3                                        | 0   | 1 | 0.00 | 0.00 |
| 5q#76261_76651    | 5  | 130433184-133831634 | 3398451 | F1, IL5, RAD50, BC042122, IL13, IL4, BC033341, KIF3A, | 0   | 1 | 0.00 | 0.00 |
| 5q#76701_76716    | 5  | 134229370-134372011 | 142642  | BC012749, C5orf14, PCBD2, CATSPER3                    | 0   | 1 | 0.00 | 0.00 |
| 5q#76777_76852    | 5  | 134912849-135712556 | 799708  | 14, LOC153328, IL9, BC044938, FBXL21, LECT2, TGFB     | 0   | 1 | 0.00 | 0.00 |
| 10q#131673_131692 | 10 | 49975878-50206925   | 231048  | C10orf72, AK093055, BC047724, C10orf71                | 0   | 1 | 0.00 | 0.00 |
| 11p#142468_142472 | 11 | 36479646-36514157   | 34512   | TRAF6, BC037344                                       | 0   | 1 | 0.00 | 0.00 |
| 11p#142494_142503 | 11 | 36724264-37082864   | 358601  |                                                       | Inf | 1 | 0.02 | 0.00 |
| 11p#142705_142708 | 11 | 41548058-41606489   | 58432   |                                                       | 0   | 1 | 0.00 | 0.00 |
| 11p#143275_143282 | 11 | 48251937-48322434   | 70498   | OR4C3                                                 | 0   | 1 | 0.00 | 0.00 |
| 15q#181462_181473 | 15 | 56263743-56440953   | 177211  | AQP9, AK095426                                        | 0   | 1 | 0.00 | 0.00 |
| 15q#183486_183524 | 15 | 73877640-74186453   | 308814  | UBE2Q2, FBXO22, NRG4, C15orf27                        | 0   | 1 | 0.00 | 0.00 |
| 15q#183632_183638 | 15 | 75056230-75117857   | 61628   | PSTPIP1                                               | 0   | 1 | 0.00 | 0.00 |
| 15q#183884_183951 | 15 | 77172452-77941602   | 769151  | AK127037, TMED3, KIAA1024, MTHFS                      | Inf | 1 | 0.02 | 0.00 |
| 15q#185765_185767 | 15 | 98123394-98142003   | 18610   |                                                       | Inf | 1 | 0.02 | 0.00 |
| 19p#209027_209029 | 19 | 22718179-22735017   | 16839   | BC021822                                              | 0   | 1 | 0.00 | 0.00 |
| 19p#209060_209076 | 19 | 23164067-23326055   | 161989  | AK023040, AK002041                                    | 0   | 1 | 0.00 | 0.00 |
| 19p#206599_206608 | 19 | 1214544-1237307     | 22764   | AK024373, C19orf23, CIRBP, C19orf24, EFNA2            | 0   | 1 | 0.00 | 0.00 |
| 2q#35744_35752    | 2  | 218497684-218560336 | 62653   | TNS1                                                  | 0   | 1 | 0.00 | 0.00 |
| 2q#36254_36407    | 2  | 224017236-226154972 | 2137737 | WDFY1, MRPL44, SERPINE2, FLJ22746, CUL3, DOCK         | 0   | 1 | 0.00 | 0.00 |
| 2q#36408_36444    | 2  | 226154913-226603383 | 448471  | AK055226, BC043591                                    | 0   | 1 | 0.00 | 0.00 |
| 2q#36445_36450    | 2  | 226634870-226729868 | 94999   |                                                       | 0   | 1 | 0.00 | 0.00 |
| 2q#36468_36606    | 2  | 226922913-228119184 | 1196272 | RHBDD1, AX775823, COL4A4, COL4A3, BC035052, C         | 0   | 1 | 0.00 | 0.00 |

|                   |    |                     |         |                                                     |             |   |      |      |
|-------------------|----|---------------------|---------|-----------------------------------------------------|-------------|---|------|------|
| 4q#60134_60144    | 4  | 88246802-88336103   | 89302   | BC017432, AFF1                                      | 0           | 1 | 0.00 | 0.00 |
| 4q#60202_60204    | 4  | 88901175-88914011   | 12837   |                                                     | 0           | 1 | 0.00 | 0.00 |
| 4q#60606_60607    | 4  | 93338691-93385650   | 46960   |                                                     | 0           | 1 | 0.00 | 0.00 |
| 5q#75785_75804    | 5  | 123070105-123692415 | 622311  |                                                     | 0           | 1 | 0.00 | 0.00 |
| 10q#133526_133658 | 10 | 73443244-74569505   | 1126262 | orf104, DDIT4, DNAJB12, CBARA1, C10orf42, OIT3, PLA | 0           | 1 | 0.00 | 0.00 |
| 10q#133659_133668 | 10 | 74578132-74653698   | 75567   | ECD, AB023191                                       | 0           | 1 | 0.00 | 0.00 |
| 10q#133669_133718 | 10 | 74661916-75061453   | 399538  | MRPS16, TTC18, ANXA7, ZMYND17, PPP3CB, USP54        | 0           | 1 | 0.00 | 0.00 |
| 10q#133733_133759 | 10 | 75203876-75372095   | 168220  | 4, CHCHD1, LOC196752, KIAA0913, NDST2, CAMK2G,      | 0           | 1 | 0.00 | 0.00 |
| 11p#141255_141271 | 11 | 19862445-19998793   | 136349  | NAV2                                                | 0           | 1 | 0.00 | 0.00 |
| 11p#141731_141753 | 11 | 27327162-27483152   | 155991  | CCDC34, AF155108, LGR4, LIN7C                       | Inf         | 1 | 0.02 | 0.00 |
| 11p#141867_141873 | 11 | 29331885-29459410   | 127526  |                                                     | 0           | 1 | 0.00 | 0.00 |
| 15q#182459_182609 | 15 | 64776832-66193616   | 1416785 | J11506, IQCH, BC047537, AY726587, MAP2K5, AY6695    | 0           | 1 | 0.00 | 0.00 |
| 15q#182651_182657 | 15 | 66499644-66615930   | 116287  | ITGA11                                              | 0           | 1 | 0.00 | 0.00 |
| 15q#182658_182681 | 15 | 66635026-66812717   | 177692  | AK126633, CORO2B                                    | Inf         | 1 | 0.02 | 0.00 |
| 15q#183259_183267 | 15 | 72276390-72331263   | 54874   | STRA6, AK056125, AK057417                           | 0           | 1 | 0.00 | 0.00 |
| 15q#183268_183339 | 15 | 72336544-72856914   | 520371  | A1, SEMA7A, UBL7, BC014373, AK127909, ARID3B, CLA   | 0           | 1 | 0.00 | 0.00 |
| 15q#183352_183389 | 15 | 72921195-73135495   | 214301  | 17, SCAMP2, MPI, C15orf17, COX5A, RPP25, SCAMP5,    | 0           | 1 | 0.00 | 0.00 |
| 15q#183390_183400 | 15 | 73147722-73279197   | 131476  | AK128205                                            | 0           | 1 | 0.00 | 0.00 |
| 15q#183431_183435 | 15 | 73501789-73531548   | 29760   | SIN3A, AL832463                                     | 0           | 1 | 0.00 | 0.00 |
| 3p#38000_38009    | 3  | 39066-177685        | 138620  |                                                     | 0           | 1 | 0.00 | 0.00 |
| 3p#38010_38018    | 3  | 200925-281465       | 80541   | CHL1                                                | 0           | 1 | 0.00 | 0.00 |
| 4q#58982_59001    | 4  | 75262147-75400382   | 138236  | CXCL3, L10403, CXCL2, AX794781, MTHFD2L             | Inf         | 1 | 0.02 | 0.00 |
| 4q#59025_59052    | 4  | 75595306-75999242   | 403937  | EREG, AREG                                          | Inf         | 1 | 0.02 | 0.00 |
| 4q#59066_59086    | 4  | 76190253-76445703   | 255451  | DKFZP564O0823                                       | Inf         | 1 | 0.02 | 0.00 |
| 4q#59087_59097    | 4  | 76493196-76774550   | 281355  | RCHY1                                               | 0.692294348 | 1 | 0.02 | 0.02 |
| 10p#129484_129533 | 10 | 16685373-17109709   | 424337  | RSU1, CUBN                                          | 0           | 1 | 0.00 | 0.00 |
| 10p#129534_129559 | 10 | 17115492-17319968   | 204477  | CUBN, DNMT2, BC078172, VIM                          | 0           | 1 | 0.00 | 0.00 |
| 11p#142992_143051 | 11 | 45847210-46421644   | 574435  | , PEX16, GYLTL1B, PHF21A, CREB3L1, DGKZ, MDK, C     | 0           | 1 | 0.00 | 0.00 |
| 11p#143146_143167 | 11 | 47221687-47380060   | 158374  | P2, BC041172, NR1H3, MADD, MYBPC3, SPI1, BX6474     | 0           | 1 | 0.00 | 0.00 |
| 12p#152830_152838 | 12 | 21961248-22087877   | 126630  | ABCC9                                               | 0           | 1 | 0.00 | 0.00 |
| 19q#209503_209518 | 19 | 38963951-39292833   | 328883  | KCTD15                                              | Inf         | 1 | 0.02 | 0.00 |
| 19q#209746_209774 | 19 | 41104979-41323133   | 218155  | 5445, ALKBH6, CLIPR-59, THAP8, WDR62, POLR2I, CK    | 0           | 1 | 0.00 | 0.00 |
| 12p#153547_153551 | 12 | 31086179-31152158   | 65980   | AK096360, DDX11                                     | 0           | 1 | 0.00 | 0.00 |
| 12p#153560_153566 | 12 | 31314993-31375512   | 60520   | FAM60A                                              | 0           | 1 | 0.00 | 0.00 |
| 1p#2885_3004      | 1  | 29461651-31572736   | 2111086 | MATN1, LAPTM5, AB007937, SDC3, PUM1, FAM77C, W      | 0           | 1 | 0.00 | 0.00 |
| 1p#3005_3026      | 1  | 31576551-31772792   | 196242  | 2, AK093618, AK128262, CR596614, TINAGL1, HCRTR     | 0           | 1 | 0.00 | 0.00 |
| 3p#43700_43727    | 3  | 62749838-63120918   | 371081  | CADPS, BC039502                                     | 0           | 1 | 0.00 | 0.00 |
| 9q#127935_127954  | 9  | 137529571-137644712 | 115142  | FLJ20433, NOXA1, ENTPD8, NELLF, C9orf111            | 0           | 1 | 0.00 | 0.00 |
| 11q#143629_143639 | 11 | 56709137-56768788   | 59652   | LRRCS5, AGTRL1                                      | 0           | 1 | 0.00 | 0.00 |
| 15q#178571_178576 | 15 | 27780026-27822134   | 42109   | TJP1                                                | 0           | 1 | 0.00 | 0.00 |
| 15q#178594_178609 | 15 | 27994706-28160745   | 166040  | CR749235                                            | 0           | 1 | 0.00 | 0.00 |
| 9q#127835_127846  | 9  | 136961223-137024293 | 63071   | TMEM141, KIAA1984, C9orf86, PHPT1, MAMDC4           | 0           | 1 | 0.00 | 0.00 |
| 1p#8172_8255      | 1  | 92045213-92867437   | 822225  | T, ABHD7, BTBD8, AF017090, AB029030, AL080072, C1   | 0           | 1 | 0.00 | 0.00 |
| 9p#121655_121656  | 9  | 38731378-38758291   | 26914   |                                                     | 0           | 1 | 0.00 | 0.00 |
| 2q#36802_36803    | 2  | 230338950-230345112 | 6163    | DNER                                                | 0           | 1 | 0.00 | 0.00 |
| 3p#44911_44916    | 3  | 79936073-80091648   | 155576  |                                                     | 0           | 1 | 0.00 | 0.00 |
| 11p#141457_141500 | 11 | 22337320-23002245   | 664926  | SLC17A6, FANCF, GAS2, AL833119, CR608644            | 0           | 1 | 0.00 | 0.00 |
| 11q#143979_143983 | 11 | 59669672-59707258   | 37587   | MS4A6A                                              | 0           | 1 | 0.00 | 0.00 |
| 15q#179723_179752 | 15 | 39515019-39684366   | 169348  | RTF1, ITPKA, LTK, RPAP1, TYRO3                      | 0           | 1 | 0.00 | 0.00 |
| 16q#192637_192642 | 16 | 86631337-86676217   | 44881   | BANP                                                | 0           | 1 | 0.00 | 0.00 |
| 4q#67316_67318    | 4  | 189715174-189735549 | 20376   | AY494056                                            | 0           | 1 | 0.00 | 0.00 |
| 15q#178611_178659 | 15 | 28517805-29146904   | 629100  | 2, BC071990, BC112921, AK095096, KIAA1018, MTMR1    | 0           | 1 | 0.00 | 0.00 |
| 15q#178805_178814 | 15 | 30902331-30972855   | 70525   | AK127078                                            | 0           | 1 | 0.00 | 0.00 |
| 16q#192643_192655 | 16 | 86683151-86861873   | 178723  | AK126852, AF147365                                  | 0           | 1 | 0.00 | 0.00 |
| 19p#206609_206626 | 19 | 1240720-1376982     | 136263  | EFNA2, AK024373, MUM1, NDUFS7, GAMT, DAZAP1         | 0           | 1 | 0.00 | 0.00 |



|                   |    |                     |         |                                                   |             |   |      |      |
|-------------------|----|---------------------|---------|---------------------------------------------------|-------------|---|------|------|
| 1p#1_6            | 1  | 604268-797005       | 192738  | AK026901, AK125248                                | 0           | 1 | 0.00 | 0.00 |
| 3p#44327_44338    | 3  | 71233618-71340879   | 107262  | FOXP1                                             | 0           | 1 | 0.00 | 0.00 |
| 3p#44409_44457    | 3  | 72095931-72947258   | 851328  | AK097190, AK055831, AB029551, RYBP, SHQ1          | 0           | 1 | 0.00 | 0.00 |
| 3p#44543_44575    | 3  | 74118078-74618443   | 500366  | CNTN3                                             | 0           | 1 | 0.00 | 0.00 |
| 9q#128008_128022  | 9  | 138072410-138184895 | 112486  | CACNA1B                                           | 0           | 1 | 0.00 | 0.00 |
| 11q#143663_143667 | 11 | 56931968-56957143   | 25176   | SLC43A3                                           | 0           | 1 | 0.00 | 0.00 |
| 15q#178422_178487 | 15 | 25681152-26214052   | 532901  | OCA2, HERC2                                       | 0           | 1 | 0.00 | 0.00 |
| 15q#178503_178509 | 15 | 27055481-27093362   | 37882   | APBA2                                             | 0           | 1 | 0.00 | 0.00 |
| 15q#178536_178549 | 15 | 27307367-27428503   | 121137  | AK074138, NDNL2                                   | 0           | 1 | 0.00 | 0.00 |
| 2q#35431_35439    | 2  | 214814813-214886386 | 71574   | SPAG16                                            | 0           | 1 | 0.00 | 0.00 |
| 2q#35675_35680    | 2  | 217374009-217379015 | 5007    | IGFBP5                                            | 0           | 1 | 0.00 | 0.00 |
| 2q#35759_35763    | 2  | 218622149-218648434 | 26286   | TNS1, AK001785                                    | 0           | 1 | 0.00 | 0.00 |
| 2q#36005_36018    | 2  | 220178030-220240583 | 62554   | AY603755, GMPPA, ACCN4, CHPF, MGC99813            | 0           | 1 | 0.00 | 0.00 |
| 2q#36039_36040    | 2  | 220386980-220400235 | 13256   |                                                   | 0           | 1 | 0.00 | 0.00 |
| 4p#54900_54922    | 4  | 9527590-9725891     | 198302  | SLC2A9                                            | 0           | 1 | 0.00 | 0.00 |
| 4q#61193_61316    | 4  | 100578035-102318179 | 1740145 | 24orf17, RG9MTD2, MTPP, AL833279, DAPP1, MAP2K1   | 0           | 1 | 0.00 | 0.00 |
| 5q#76853_76859    | 5  | 135725275-135797158 | 71884   |                                                   | 0           | 1 | 0.00 | 0.00 |
| 5q#76871_76927    | 5  | 136208270-136797911 | 589642  | SPOCK1                                            | 0           | 1 | 0.00 | 0.00 |
| 5q#76928_76958    | 5  | 136805377-137116346 | 310970  | SPOCK1, KLHL3, HNRPA0                             | 0           | 1 | 0.00 | 0.00 |
| 5q#77336_77342    | 5  | 140184763-140207644 | 22882   | PCDHA1                                            | 0           | 1 | 0.00 | 0.00 |
| 5q#78319_78334    | 5  | 150137980-150290480 | 152501  | L08442, NID67, ZNF300, AK091436                   | 0           | 1 | 0.00 | 0.00 |
| 5q#78601_78655    | 5  | 153707528-154224457 | 516930  | BC042059, SAP30L, AK027248, HAND1, LARP1, C5orf   | 0           | 1 | 0.00 | 0.00 |
| 5q#78702_79064    | 5  | 155211994-159402739 | 4190746 | X30, AK057089, ICF45, AK223119, LSM11, BC051353,  | 0           | 1 | 0.00 | 0.00 |
| 5q#79065_79134    | 5  | 159410707-159984313 | 573607  | CCNJL, AK131381, C1QTNF2, LOC63920, SLU7, PTT     | 0           | 1 | 0.00 | 0.00 |
| 5q#79143_79161    | 5  | 160068262-160316814 | 248553  | AB078258                                          | 0           | 1 | 0.00 | 0.00 |
| 6p#80838_80957    | 6  | 691495-1896584      | 1205090 | C037855, FLJ34594, FOXQ1, FOXF2, BC087858, AK02   | 0           | 1 | 0.00 | 0.00 |
| 10q#131535_131537 | 10 | 47148030-47161291   | 13262   | AK057316                                          | 0           | 1 | 0.00 | 0.00 |
| 10q#131556_131560 | 10 | 48042845-48063087   | 20243   | GDF10                                             | 0           | 1 | 0.00 | 0.00 |
| 10q#131569_131643 | 10 | 48871525-49712228   | 840704  | MPD2, CR614448, MAPK8, ARHGAP22, AK055937, C10    | 0           | 1 | 0.00 | 0.00 |
| 10q#131693_131708 | 10 | 50214037-50371213   | 157177  | ERCC6                                             | 0           | 1 | 0.00 | 0.00 |
| 11p#142231_142403 | 11 | 33766861-35897900   | 2131040 | AT, ELF5, EHF, APIP, PDHX, CD44, SLC1A2, DKFZP58  | 0.692294348 | 1 | 0.02 | 0.02 |
| 11p#142709_142743 | 11 | 41641283-42630388   | 989106  | AY726565                                          | 0           | 1 | 0.00 | 0.00 |
| 11p#143283_143298 | 11 | 48332029-48953082   | 621054  |                                                   | 0           | 1 | 0.00 | 0.00 |
| 15q#181303_181364 | 15 | 54786703-55311815   | 525113  | SUHW4, BC036541, TCF12                            | 0           | 1 | 0.00 | 0.00 |
| 15q#181365_181375 | 15 | 55318518-55420503   | 101986  | TCF12, AK097083                                   | 0           | 1 | 0.00 | 0.00 |
| 15q#181376_181377 | 15 | 55433725-55443356   | 9632    |                                                   | Inf         | 1 | 0.02 | 0.00 |
| 15q#181378_181391 | 15 | 55455562-55560283   | 104722  | CGNL1                                             | Inf         | 1 | 0.02 | 0.00 |
| 15q#181433_181458 | 15 | 55998944-56238765   | 239822  | ALDH1A2, BC034958, AQP9                           | Inf         | 1 | 0.02 | 0.00 |
| 15q#181459_181461 | 15 | 56244772-56258250   | 13479   | AQP9                                              | 0           | 1 | 0.00 | 0.00 |
| 15q#183525_183530 | 15 | 74201826-74238141   | 36316   | C15orf27                                          | 0           | 1 | 0.00 | 0.00 |
| 15q#183531_183547 | 15 | 74244753-74379494   | 134742  | C15orf27, ETFA                                    | 0           | 1 | 0.00 | 0.00 |
| 15q#183581_183584 | 15 | 74618693-74645683   | 26991   | ZNF291                                            | 0           | 1 | 0.00 | 0.00 |
| 15q#183609_183631 | 15 | 74851093-75041248   | 190156  | ZNF291, AB040887, RCN2                            | 0           | 1 | 0.00 | 0.00 |
| 15q#183639_183721 | 15 | 75125735-76023607   | 897873  | PAN3, AB082533, C15orf5, HMG20A, LRRN6A, BC0685   | 0           | 1 | 0.00 | 0.00 |
| 15q#183722_183726 | 15 | 76039303-76070006   | 30704   | BC047538                                          | 0           | 1 | 0.00 | 0.00 |
| 15q#183859_183883 | 15 | 77006829-77167306   | 160478  | CTSH, RASGRF1                                     | Inf         | 1 | 0.02 | 0.00 |
| 15q#183952_183995 | 15 | 77947011-78278589   | 331579  | _109714, AF249277, BCL2A1, AF161558, ZA20D3, FAH, | Inf         | 1 | 0.02 | 0.00 |
| 15q#185697_185764 | 15 | 97551375-98117701   | 566327  | C28, AK091588, AB208985, MEF2A, AL831995, AK0567  | Inf         | 1 | 0.02 | 0.00 |
| 15q#185778_185807 | 15 | 98251436-98528512   | 277077  | AK057529, ADAMTS17                                | Inf         | 1 | 0.02 | 0.00 |
| 15q#185808_185828 | 15 | 98546266-98690474   | 144209  | ADAMTS17                                          | 0           | 1 | 0.00 | 0.00 |
| 15q#185829_185833 | 15 | 98695729-98741357   | 45629   | ADAMTS17, FLJ42289                                | Inf         | 1 | 0.02 | 0.00 |
| 15q#185873_185902 | 15 | 99070776-99321767   | 250992  | LOC440313, AK056534, ALDH1A3, LRRK1               | Inf         | 1 | 0.02 | 0.00 |
| 19q#209157_209193 | 19 | 33405225-34138106   | 732882  | CR599476, BC068609                                | 0           | 1 | 0.00 | 0.00 |
| 5p#68941_68946    | 5  | 20844285-20931799   | 87515   | AK093362                                          | 0           | 1 | 0.00 | 0.00 |
| 5q#80074_80085    | 5  | 173399535-173490378 | 90844   | HMP19                                             | 0           | 1 | 0.00 | 0.00 |

|                   |    |                     |         |                                                     |             |   |   |      |      |
|-------------------|----|---------------------|---------|-----------------------------------------------------|-------------|---|---|------|------|
| 5q#80103_80108    | 5  | 174027236-174086084 | 58849   | MSX2                                                |             | 0 | 1 | 0.00 | 0.00 |
| 5q#80121_80134    | 5  | 174292637-174557243 | 264607  | FLJ16171                                            |             | 0 | 1 | 0.00 | 0.00 |
| 5q#80135_80140    | 5  | 174592569-174754205 | 161637  |                                                     |             | 0 | 1 | 0.00 | 0.00 |
| 5q#80141_80186    | 5  | 174774486-175239017 | 464532  | DRD1, SFXN1, BC054510, HRH2, CPLX2                  |             | 0 | 1 | 0.00 | 0.00 |
| 19q#209808_209842 | 19 | 41672604-42026041   | 353438  | AK022329, ZFP260, ZNF529, MGC62100                  |             | 0 | 1 | 0.00 | 0.00 |
| 19q#209843_209849 | 19 | 42032200-42087938   | 55739   | ZNF345, BC010386, DKFZp779O175                      |             | 0 | 1 | 0.00 | 0.00 |
| 19q#209851_209859 | 19 | 42113341-42224129   | 110789  | ZNF568, BC016334, BC108696                          | 0.692294348 |   | 1 | 0.02 | 0.02 |
| 19q#209860_209878 | 19 | 42245648-42413631   | 167984  | F420, BC026081, ZNF585A, ZNF585B, AK091760, ZNF585C | 0.692294348 |   | 1 | 0.02 | 0.02 |
| 1p#3213_3225      | 1  | 33418574-33518081   | 99508   | FLJ25476, PHC2, AJ242730                            | 0           |   | 1 | 0.00 | 0.00 |
| 4p#54019_54026    | 4  | 671739-727767       | 56029   | MFS7, PCGF3                                         | 0           |   | 1 | 0.00 | 0.00 |
| 11q#143508_143531 | 11 | 55660165-55797246   | 137082  | OR8K5, OR5T2                                        | 0           |   | 1 | 0.00 | 0.00 |
| 11q#143605_143614 | 11 | 56339091-56472936   | 133846  | AB231741, AK096987                                  | 0           |   | 1 | 0.00 | 0.00 |
| 11q#143627_143628 | 11 | 56698220-56703475   | 5256    |                                                     | 0           |   | 1 | 0.00 | 0.00 |
| 11q#143661_143662 | 11 | 56923490-56931137   | 7648    | Z26248, SLC43A3                                     | 0           |   | 1 | 0.00 | 0.00 |
| 15q#178488_178496 | 15 | 26232938-27009438   | 776501  | HERC2, BC007794, APBA2                              | 0           |   | 1 | 0.00 | 0.00 |
| 15q#178497_178502 | 15 | 27014618-27046889   | 32272   | APBA2                                               | 0           |   | 1 | 0.00 | 0.00 |
| 1p#2873_2884      | 1  | 29357441-29454289   | 96849   | MECR, PTPRU                                         | 0           |   | 1 | 0.00 | 0.00 |
| 9q#127847_127880  | 9  | 137030022-137227439 | 197418  | CR607386, LCN12, PTGDS, AK097466, C9orf142, ABC1    | 0           |   | 1 | 0.00 | 0.00 |
| 9q#127881_127934  | 9  | 137229925-137523274 | 293350  | 2, SSNA1, C9orf75, NDOR1, AK128153, SLC34A3, LOC    | 0           |   | 1 | 0.00 | 0.00 |
| 11q#143640_143660 | 11 | 56774100-56918249   | 144150  | KS1BP1, SSRP1, P2RX3, PRG3, CR600406, PRG2, Z26     | 0           |   | 1 | 0.00 | 0.00 |
| 15q#177938_177943 | 15 | 18362555-18454109   | 91555   |                                                     | 0           |   | 1 | 0.00 | 0.00 |
| 2q#35168_35175    | 2  | 212063135-212125235 | 62101   | ERBB4                                               | 0           |   | 1 | 0.00 | 0.00 |
| 2q#35176_35214    | 2  | 212130750-212461177 | 330428  | ERBB4                                               | 0           |   | 1 | 0.00 | 0.00 |
| 2q#35240_35244    | 2  | 212665713-212711067 | 45355   | ERBB4                                               | 0           |   | 1 | 0.00 | 0.00 |
| 2q#35245_35249    | 2  | 212719004-212756556 | 37553   | ERBB4                                               | 0           |   | 1 | 0.00 | 0.00 |
| 2q#35250_35316    | 2  | 212770698-213542079 | 771382  | ERBB4                                               | 0           |   | 1 | 0.00 | 0.00 |
| 2q#35317_35324    | 2  | 213560803-213705087 | 144285  | ZNFN1A2                                             | 0           |   | 1 | 0.00 | 0.00 |
| 2q#35392_35421    | 2  | 214415205-214704256 | 289052  | SPAG16                                              | 0           |   | 1 | 0.00 | 0.00 |
| 2q#35742_35743    | 2  | 218474753-218485832 | 11080   |                                                     | 0           |   | 1 | 0.00 | 0.00 |
| 2q#35753_35754    | 2  | 218565698-218572629 | 6932    | TNS1                                                | 0           |   | 1 | 0.00 | 0.00 |
| 3p#45158_45215    | 3  | 85396126-85875524   | 479399  | BC105999, IGSF4D                                    | Inf         |   | 1 | 0.02 | 0.00 |
| 4p#54896_54898    | 4  | 9490990-9509070     | 18081   | SLC2A9                                              | 0           |   | 1 | 0.00 | 0.00 |
| 4p#55772_55804    | 4  | 22252665-22796619   | 543955  | GBA3, CR607430                                      | 0           |   | 1 | 0.00 | 0.00 |
| 4q#60548_60552    | 4  | 92514449-92540291   | 25843   | AB051467                                            | 0           |   | 1 | 0.00 | 0.00 |
| 4q#60563_60605    | 4  | 92619157-93292561   | 673405  | AB051467                                            | 0           |   | 1 | 0.00 | 0.00 |
| 4q#60910_60932    | 4  | 96645905-96879645   | 233741  | UNC5C                                               | 0           |   | 1 | 0.00 | 0.00 |
| 4q#60972_61064    | 4  | 97832059-99204929   | 1372871 | BX648305, MGC46496                                  | 0           |   | 1 | 0.00 | 0.00 |
| 5q#76717_76776    | 5  | 134382569-134908753 | 526185  | PITX1, AK028965, H2AFY, C5orf20, NEUROG1            | 0           |   | 1 | 0.00 | 0.00 |
| 6p#80819_80827    | 6  | 494221-582886       | 88666   | EXOC2                                               | 0           |   | 1 | 0.00 | 0.00 |
| 10q#131325_131329 | 10 | 43194697-43226354   | 31658   | HNRPF                                               | 0           |   | 1 | 0.00 | 0.00 |
| 11p#142473_142492 | 11 | 36521841-36662748   | 140908  | BC037344, RAG1, RAG2, C11orf74, AK095997            | 0           |   | 1 | 0.00 | 0.00 |
| 15q#183436_183463 | 15 | 73540323-73725350   | 185028  | PTPN9, RNUT1, IMP3, AK057531                        | 0           |   | 1 | 0.00 | 0.00 |
| 19p#209019_209026 | 19 | 22605752-22687217   | 81466   | AB040906                                            | 0           |   | 1 | 0.00 | 0.00 |
| 19p#209030_209059 | 19 | 22745499-23143762   | 398264  | BC037873, AK131472                                  | 0           |   | 1 | 0.00 | 0.00 |
| 19q#209226_209233 | 19 | 34783213-34820829   | 37617   | POP4                                                | 0           |   | 1 | 0.00 | 0.00 |
| 19q#209291_209301 | 19 | 35655423-35747520   | 92098   | ZNF536                                              | 0           |   | 1 | 0.00 | 0.00 |
| 1p#2246_2387      | 1  | 23745729-25208694   | 1462966 | PIP1, MYOM3, BX647455, IL22RA1, IL28RA, BC033556,   | 0           |   | 1 | 0.00 | 0.00 |
| 1p#2565_2570      | 1  | 26662496-26722295   | 59800   | BC015798, ARID1A                                    | 0           |   | 1 | 0.00 | 0.00 |
| 1p#2576_2610      | 1  | 26778396-26978591   | 200196  | C015798, ZDHHC18, SFN, ATPBD1B, GPATC3, NR0B2,      | 0           |   | 1 | 0.00 | 0.00 |
| 9q#127833_127834  | 9  | 136947212-136950562 | 3351    |                                                     | 0           |   | 1 | 0.00 | 0.00 |
| 4q#60145_60201    | 4  | 88345746-88894935   | 549190  | 44, KLHL8, AK123781, HSD17B13, DHRS8, NUDT9, SF     | 0           |   | 1 | 0.00 | 0.00 |
| 4q#60362_60396    | 4  | 90481690-91031994   | 550305  | AK091461, LOC285513, CR605611, SNCA                 | 0           |   | 1 | 0.00 | 0.00 |
| 4q#60444_60494    | 4  | 91631638-92067176   | 435539  | MGC48628, AB051467                                  | 0           |   | 1 | 0.00 | 0.00 |
| 11p#141223_141243 | 11 | 19488501-19758231   | 269731  | AB063115, NAV2                                      | 0           |   | 1 | 0.00 | 0.00 |
| 11p#141272_141286 | 11 | 20011070-20155521   | 144452  | NAV2, AK057087, DBX1                                | 0           |   | 1 | 0.00 | 0.00 |



|                   |    |                     |         |                                                   |     |   |      |      |
|-------------------|----|---------------------|---------|---------------------------------------------------|-----|---|------|------|
| 12p#153523_153546 | 12 | 30741987-31074579   | 332593  | C1QDC1, BC039526, BC084571, AK024399, AK096360    | 0   | 1 | 0.00 | 0.00 |
| 12p#153567_153568 | 12 | 31383497-31396719   | 13223   |                                                   | 0   | 1 | 0.00 | 0.00 |
| 3p#44603_44608    | 3  | 75202988-75325561   | 122574  |                                                   | 0   | 1 | 0.00 | 0.00 |
| 3p#44917_44923    | 3  | 80141862-80259306   | 117445  |                                                   | 0   | 1 | 0.00 | 0.00 |
| 4q#67319_67328    | 4  | 189754471-189883579 | 129109  | AY494056, AK095968                                | 0   | 1 | 0.00 | 0.00 |
| 5q#71990_71993    | 5  | 67549843-67578633   | 28791   | BC094795, PIK3R1                                  | 0   | 1 | 0.00 | 0.00 |
| 10q#134336_134337 | 10 | 82099899-82105011   | 5113    | DYDC1                                             | Inf | 1 | 0.02 | 0.00 |
| 11q#143958_143978 | 11 | 59436207-59669731   | 233525  | AB231702, AB231701, TME122, MS4A3, MS4A2          | 0   | 1 | 0.00 | 0.00 |
| 11q#143984_143993 | 11 | 59721175-59806517   | 85343   | AB231731, MS4A4A                                  | 0   | 1 | 0.00 | 0.00 |
| 15q#178775_178804 | 15 | 30715296-30893233   | 177938  | GAP11A, SCG5, GREM1, BC029107, CR749577, AK12     | 0   | 1 | 0.00 | 0.00 |
| 15q#178815_178826 | 15 | 30981596-31087494   | 105899  | AK127078                                          | 0   | 1 | 0.00 | 0.00 |
| 15q#179122_179160 | 15 | 33522640-33916429   | 393790  | ATPBD4, AK096400                                  | 0   | 1 | 0.00 | 0.00 |
| 15q#179170_179176 | 15 | 34048639-34111617   | 62979   | AK096400                                          | 0   | 1 | 0.00 | 0.00 |
| 15q#179290_179304 | 15 | 35632785-36009633   | 376849  |                                                   | 0   | 1 | 0.00 | 0.00 |
| 15q#179621_179627 | 15 | 38856841-38888425   | 31585   | DNAJC17, ZFYVE19                                  | 0   | 1 | 0.00 | 0.00 |
| 15q#179817_179819 | 15 | 40191641-40212879   | 21239   |                                                   | 0   | 1 | 0.00 | 0.00 |
| 15q#179820_179840 | 15 | 40217541-40402885   | 185345  | PLA2G4F, VPS39, TME187A, GANC                     | 0   | 1 | 0.00 | 0.00 |
| 15q#179841_179908 | 15 | 40408915-40924577   | 515663  | , SNAP23, AK123438, LRR57, CEP27, CR627426, CR    | 0   | 1 | 0.00 | 0.00 |
| 4q#57899_57903    | 4  | 57531711-57585540   | 53830   |                                                   | 0   | 1 | 0.00 | 0.00 |
| 4q#57925_57930    | 4  | 57756927-57809096   | 52170   | IGFBP7                                            | 0   | 1 | 0.00 | 0.00 |
| 4q#58004_58013    | 4  | 59986528-60257966   | 271439  |                                                   | 0   | 1 | 0.00 | 0.00 |
| 4q#59456_59469    | 4  | 80157669-80226657   | 68989   | BMP2K, PAQR3                                      | 0   | 1 | 0.00 | 0.00 |
| 4q#59470_59471    | 4  | 80235672-80250055   | 14384   |                                                   | 0   | 1 | 0.00 | 0.00 |
| 5q#77232_77254    | 5  | 139411170-139603521 | 192352  | BC042448, PURA, LOC492311, CR627225, ORF1-FL49    | 0   | 1 | 0.00 | 0.00 |
| 5q#77255_77295    | 5  | 139619227-139926214 | 306988  | 1, HBEGF, SLC4A9, BX648362, MASK-BP3, APBB3, SL   | 0   | 1 | 0.00 | 0.00 |
| 5q#77377_77532    | 5  | 140445157-141538138 | 1092982 | 217745, PCDHB14, AK095496, AF329369, PCDHB15, A   | 0   | 1 | 0.00 | 0.00 |
| 5q#77889_77937    | 5  | 146356012-146944816 | 588805  | 2R2B, STK32A, AK094580, DPYSL3, BC077077, AK02    | 0   | 1 | 0.00 | 0.00 |
| 5q#77947_78131    | 5  | 147029750-148724190 | 1694441 | AK5L3, AK054753, SPINK7, SPINK9, FBXO38, HTR4, AB | 0   | 1 | 0.00 | 0.00 |
| 6p#81015_81097    | 6  | 2517133-3119598     | 602466  | 0, SERPINB9, SERPINB6, DKFZp686l15217, AB209779   | 0   | 1 | 0.00 | 0.00 |
| 11p#142779_142828 | 11 | 43392638-43898554   | 505917  | TTC17, HSD17B12, AF088008, ALKBH3, AK097541       | 0   | 1 | 0.00 | 0.00 |
| 11p#143168_143176 | 11 | 47384514-47426773   | 42260   | BX647491, SLC39A13, PSMC3, RAPS                   | 0   | 1 | 0.00 | 0.00 |
| 12p#151080_151115 | 12 | 3413748-3757589     | 343842  | AK125333, PRMT8, AK091124, EFCAB4B, CR627161      | 0   | 1 | 0.00 | 0.00 |
| 12p#151116_151123 | 12 | 3772199-3851160     | 78962   | BC031073, PARP11                                  | 0   | 1 | 0.00 | 0.00 |
| 12p#151136_151234 | 12 | 4049648-5013227     | 963580  | RAD51AP1, DYRK4, AKAP3, NDUFA9, BC043558, GALN    | 0   | 1 | 0.00 | 0.00 |
| 15q#181103_181126 | 15 | 52658113-53116550   | 458438  | AL834407, AK127446                                | 0   | 1 | 0.00 | 0.00 |
| 15q#181128_181132 | 15 | 53173602-53252210   | 78609   | AK054599                                          | 0   | 1 | 0.00 | 0.00 |
| 15q#184897_184963 | 15 | 88341884-88811711   | 469828  | , LOC390637, TTLL13, BC052201, NGRN, AK125370, M  | 0   | 1 | 0.00 | 0.00 |
| 15q#184989_185010 | 15 | 88999998-89168960   | 168963  | BC038778, BLM                                     | 0   | 1 | 0.00 | 0.00 |
| 19q#209312_209315 | 19 | 36074722-36213288   | 138567  |                                                   | 0   | 1 | 0.00 | 0.00 |
| 19q#209317_209331 | 19 | 36288875-36515098   | 226224  | TSHZ3, BX648745                                   | 0   | 1 | 0.00 | 0.00 |
| 19q#209348_209350 | 19 | 37093935-37150627   | 56693   |                                                   | 0   | 1 | 0.00 | 0.00 |
| 19q#209501_209502 | 19 | 38941218-38951666   | 10449   | CHST8                                             | 0   | 1 | 0.00 | 0.00 |
| 19q#210710_210719 | 19 | 49918811-49989217   | 70407   | BCL3, CBLC                                        | 0   | 1 | 0.00 | 0.00 |
| 3p#44339_44356    | 3  | 71349307-71507025   | 157719  | FOXP1                                             | 0   | 1 | 0.00 | 0.00 |
| 3p#44576_44584    | 3  | 74627633-74758922   | 131290  | CNTN3                                             | 0   | 1 | 0.00 | 0.00 |
| 11q#143467_143487 | 11 | 55399790-55516856   | 117067  | OR5W2, OR5I1, AK055955                            | 0   | 1 | 0.00 | 0.00 |
| 11q#143668_143673 | 11 | 56971299-57009049   | 37751   | RTN4RL2, SLC43A1                                  | 0   | 1 | 0.00 | 0.00 |
| 15q#178660_178661 | 15 | 29150389-29156454   | 6066    | TRPM1                                             | 0   | 1 | 0.00 | 0.00 |
| 15q#178674_178703 | 15 | 29279263-29515356   | 236094  | KLF13, AK093758                                   | 0   | 1 | 0.00 | 0.00 |
| 4p#54017_54018    | 4  | 663677-667865       | 4189    | MYL5, MFSD7                                       | 0   | 1 | 0.00 | 0.00 |
| 10q#135358_135610 | 10 | 94749119-97183136   | 2430418 | 6382, BC058549, AB040949, PLCE1, NOC3L, U61098, H | 0   | 1 | 0.00 | 0.00 |
| 11q#143488_143507 | 11 | 55523089-55653425   | 130337  |                                                   | 0   | 1 | 0.00 | 0.00 |
| 15q#178050_178056 | 15 | 20618219-20697573   | 79355   | NIPA1, BX537997, BC044583                         | 0   | 1 | 0.00 | 0.00 |
| 15q#178124_178127 | 15 | 22138119-22251030   | 112912  |                                                   | Inf | 1 | 0.02 | 0.00 |
| 15q#179025_179029 | 15 | 32590643-32654620   | 63978   | BX648160                                          | 0   | 1 | 0.00 | 0.00 |

|                   |    |                     |         |                                                    |     |   |      |      |
|-------------------|----|---------------------|---------|----------------------------------------------------|-----|---|------|------|
| 4p#54027_54034    | 4  | 734945-799649       | 64705   | PCGF3, CPLX1                                       | 0   | 1 | 0.00 | 0.00 |
| 2q#35764_35899    | 2  | 218656383-219645852 | 989470  | SLC11A1, AK125889, CTDSP1, VIL1, USP37, RQCD1, F   | 0   | 1 | 0.00 | 0.00 |
| 2q#35927_35937    | 2  | 219771847-219846736 | 74890   | NHEJ1                                              | 0   | 1 | 0.00 | 0.00 |
| 2q#35938_35965    | 2  | 219851712-219963854 | 112143  | 815, C2orf17, ZFAND2B, ABCB6, ATG9A, ANKZF1, GLB   | 0   | 1 | 0.00 | 0.00 |
| 2q#36034_36038    | 2  | 220335568-220374803 | 39236   |                                                    | 0   | 1 | 0.00 | 0.00 |
| 5q#77533_77561    | 5  | 141564539-142002840 | 438302  | SPRY4, FGF1                                        | 0   | 1 | 0.00 | 0.00 |
| 5q#77605_77634    | 5  | 142445558-142720866 | 275309  | ARHGAP26, NR3C1                                    | 0   | 1 | 0.00 | 0.00 |
| 5q#77938_77946    | 5  | 146950159-147019712 | 69554   | AK027578, JAKMIP2                                  | 0   | 1 | 0.00 | 0.00 |
| 5q#79135_79142    | 5  | 159993383-160057596 | 64214   | AB018258                                           | 0   | 1 | 0.00 | 0.00 |
| 6p#80958_81014    | 6  | 1905172-2499943     | 594772  | GMD5, AK023629, CR933638, AJ420566                 | 0   | 1 | 0.00 | 0.00 |
| 6p#81399_81429    | 6  | 6212045-6495352     | 283308  | F13A1, BC037936, FLJ33708                          | 0   | 1 | 0.00 | 0.00 |
| 6p#81449_81521    | 6  | 6761073-7694206     | 933134  | B1, AJ420492, SSR1, CAGE1, RIOK1, AF143325, DSP,   | 0   | 1 | 0.00 | 0.00 |
| 10q#131407_131415 | 10 | 44567691-44679097   | 111407  | AK056518                                           | 0   | 1 | 0.00 | 0.00 |
| 10q#131561_131568 | 10 | 48075593-48866985   | 791393  |                                                    | 0   | 1 | 0.00 | 0.00 |
| 10q#131709_131747 | 10 | 50376278-50765047   | 388770  | ERCC6, CHAT, C10orf53, OGDHL, PARG                 | 0   | 1 | 0.00 | 0.00 |
| 15q#180961_180995 | 15 | 50684671-51139063   | 454393  | KIAA1370, ONECUT1                                  | 0   | 1 | 0.00 | 0.00 |
| 15q#181045_181102 | 15 | 51944498-52650142   | 705645  | AK054849, AK091491, AL834407                       | 0   | 1 | 0.00 | 0.00 |
| 15q#181133_181186 | 15 | 53256191-53651437   | 395247  | orf15, RAB27A, PIGB, CCRPG1, BC051725, DYX1C1, AL  | 0   | 1 | 0.00 | 0.00 |
| 15q#183548_183580 | 15 | 74384465-74612062   | 227598  | ETFA, ISL2, ZNF291                                 | 0   | 1 | 0.00 | 0.00 |
| 19q#210720_210721 | 19 | 49997626-50003620   | 5995    |                                                    | 0   | 1 | 0.00 | 0.00 |
| 19q#210722_210726 | 19 | 50009055-50033163   | 24109   | BCAM                                               | 0   | 1 | 0.00 | 0.00 |
| 19q#210727_210733 | 19 | 50043547-50097778   | 54232   | PVRL2, X80038, TOMM40                              | 0   | 1 | 0.00 | 0.00 |
| 1p#2388_2396      | 1  | 25246110-25314379   | 68270   | SYF2, C1orf63                                      | 0   | 1 | 0.00 | 0.00 |
| 1p#2407_2564      | 1  | 25420528-26640058   | 1219531 | PFAH2, EXTL1, SLC30A2, TRIM63, PDIK1L, GRRP1, C    | 0   | 1 | 0.00 | 0.00 |
| 1p#2571_2575      | 1  | 26737835-26769443   | 31609   | ARID1A                                             | 0   | 1 | 0.00 | 0.00 |
| 1p#2611_2872      | 1  | 26986172-29348438   | 2362267 | K12, PPP1R8, C1orf38, RPA2, SMPDL3B, XKR8, EYA3, A | 0   | 1 | 0.00 | 0.00 |
| 1p#7351_7372      | 1  | 80604746-81279476   | 674731  |                                                    | 0   | 1 | 0.00 | 0.00 |
| 1p#9080_9081      | 1  | 105108490-105139143 | 30654   |                                                    | 0   | 1 | 0.00 | 0.00 |
| 2q#35151_35167    | 2  | 211565182-212049551 | 484370  |                                                    | 0   | 1 | 0.00 | 0.00 |
| 2q#35422_35430    | 2  | 214712952-214805228 | 92277   | SPAG16                                             | 0   | 1 | 0.00 | 0.00 |
| 2q#35755_35758    | 2  | 218583490-218610729 | 27240   | TNS1                                               | 0   | 1 | 0.00 | 0.00 |
| 3p#45216_45251    | 3  | 85883036-86165190   | 282155  | IGSF4D                                             | Inf | 1 | 0.02 | 0.00 |
| 3p#45403_45415    | 3  | 88917090-89114864   | 197775  | M19503                                             | 0   | 1 | 0.00 | 0.00 |
| 4p#54894_54895    | 4  | 9477600-9483666     | 6067    |                                                    | 0   | 1 | 0.00 | 0.00 |
| 4q#60863_60888    | 4  | 96208566-96447001   | 238436  | BMPR1B, UNC5C                                      | 0   | 1 | 0.00 | 0.00 |
| 4q#60969_60971    | 4  | 97770281-97801944   | 31664   |                                                    | 0   | 1 | 0.00 | 0.00 |
| 4q#61065_61135    | 4  | 99222259-99965564   | 743306  | MGC46496, RAP1GDS1, TSPAN5                         | 0   | 1 | 0.00 | 0.00 |
| 4q#61163_61192    | 4  | 100317673-100570806 | 253134  | METAP1, ADH5, BX647987, ADH4, ADH6, ADH1A          | 0   | 1 | 0.00 | 0.00 |
| 4q#61740_61814    | 4  | 107654186-109132063 | 1477878 | DKK2, PAPSS1, AF452717                             | 0   | 1 | 0.00 | 0.00 |
| 4q#66086_66103    | 4  | 173157209-173290081 | 132873  | GALNT17                                            | 0   | 1 | 0.00 | 0.00 |
| 6p#80828_80837    | 6  | 593433-677347       | 83915   | EXOC2, AK092822                                    | 0   | 1 | 0.00 | 0.00 |
| 10q#131297_131314 | 10 | 42894870-43070337   | 175468  | RET, GALNACT-2, RASGEF1A                           | 0   | 1 | 0.00 | 0.00 |
| 10q#131540_131555 | 10 | 47954413-48039086   | 84674   | ZNF488, RBP3, GDF2                                 | 0   | 1 | 0.00 | 0.00 |
| 10q#131779_131783 | 10 | 51736811-51773305   | 36495   | TMEM23                                             | 0   | 1 | 0.00 | 0.00 |
| 15q#183727_183833 | 15 | 76075900-76759521   | 683622  | 31, ACSBG1, DNAJA4, WDR61, CRABP1, IREB2, LOC1     | 0   | 1 | 0.00 | 0.00 |
| 15q#183845_183857 | 15 | 76896445-76997390   | 100946  | AK095823, MORF4L1                                  | 0   | 1 | 0.00 | 0.00 |
| 15q#185480_185486 | 15 | 95153333-95258472   | 105140  |                                                    | 0   | 1 | 0.00 | 0.00 |
| 19q#209194_209198 | 19 | 34157751-34283359   | 125609  | BC039394                                           | 0   | 1 | 0.00 | 0.00 |
| 19q#209259_209290 | 19 | 35101437-35647245   | 545809  | BC026184, C19orf2, ZNF536                          | 0   | 1 | 0.00 | 0.00 |
| 19q#209302_209309 | 19 | 35756269-35976986   | 220718  |                                                    | 0   | 1 | 0.00 | 0.00 |
| 21q#219667_219796 | 21 | 34477295-35588028   | 1110734 | C21orf51, BC042463, KCNE1, DSCR1, CLIC6, AK0257    | 0   | 1 | 0.00 | 0.00 |
| 1p#736_753        | 1  | 8387263-8558083     | 170821  | REB                                                | 0   | 1 | 0.00 | 0.00 |
| 1p#1106_1126      | 1  | 11719273-11887703   | 168431  | 75558, AGTRAP, AL833920, MTHFR, CLCN6, NPPA, M     | 0   | 1 | 0.00 | 0.00 |
| 1p#1169_1188      | 1  | 12225810-12410973   | 185164  | VPS13D                                             | 0   | 1 | 0.00 | 0.00 |
| 1p#1905_2002      | 1  | 20286065-21269686   | 983622  | CAMK2N1, C1orf166, CDA, PINK1, DDOST, KIF17, AK14  | 0   | 1 | 0.00 | 0.00 |



|                   |    |                     |         |                                                         |             |   |      |      |
|-------------------|----|---------------------|---------|---------------------------------------------------------|-------------|---|------|------|
| 11q#143933_143957 | 11 | 59265739-59426570   | 160832  | BX538158, STX3, MRPL16, GIF, TCN1                       | 0           | 1 | 0.00 | 0.00 |
| 11q#143994_144020 | 11 | 59816563-60000842   | 184280  | MS4A4A, MS4A6E, MS4A7, NYD-SP21, MS4A5, MS4A1           | 0           | 1 | 0.00 | 0.00 |
| 11q#144158_144160 | 11 | 61084614-61106013   | 21400   | SYT7                                                    | 0           | 1 | 0.00 | 0.00 |
| 11q#144184_144187 | 11 | 61318450-61334168   | 15719   | FEN1, FADS1                                             | 0           | 1 | 0.00 | 0.00 |
| 15q#178662_178673 | 15 | 29161686-29272813   | 111128  | TRPM1                                                   | 0           | 1 | 0.00 | 0.00 |
| 15q#178704_178722 | 15 | 29543498-29737464   | 193967  | OTUD7, BC035668                                         | 0           | 1 | 0.00 | 0.00 |
| 10q#137002_137115 | 10 | 111695753-113252561 | 1556809 | DC1, DUSP5, CSPG6, BX648563, PDCD4, BC073157, E         | 0           | 1 | 0.00 | 0.00 |
| 10q#137269_137375 | 10 | 115338993-116320037 | 981045  | DCLRE1A, NHLRC2, AK126751, AF272890, C10orf118,         | 0           | 1 | 0.00 | 0.00 |
| 10q#137428_137501 | 10 | 116915361-117546214 | 630854  | ATRN1                                                   | 0           | 1 | 0.00 | 0.00 |
| 10q#134985_135077 | 10 | 90707191-91478972   | 771782  | AK091558, IFIT2, IFIT3, AK096406, IFIT1L, IFIT1, IFIT5, | 0           | 1 | 0.00 | 0.00 |
| 10q#138781_138801 | 10 | 131498353-131714040 | 215688  | EBF3                                                    | 0           | 1 | 0.00 | 0.00 |
| 15q#178128_178130 | 15 | 22272781-22329075   | 56295   |                                                         | Inf         | 1 | 0.02 | 0.00 |
| 15q#179016_179024 | 15 | 32517513-32578542   | 61030   | BX648160                                                | 0           | 1 | 0.00 | 0.00 |
| 19p#207161_207162 | 19 | 5864207-5866847     | 2641    | AK090469, CAPS                                          | 0           | 1 | 0.00 | 0.00 |
| 4q#58365_58416    | 4  | 67742173-68466175   | 724003  | PO3, CENPC1, BRDG1, UBE1L2, BC043376, AJ617629,         | 0           | 1 | 0.00 | 0.00 |
| 6p#81098_81184    | 6  | 3127746-3963186     | 835441  | 96219, C6orf85, AL110245, AK096549, BC031944, C6orf     | 0           | 1 | 0.00 | 0.00 |
| 6p#81185_81205    | 6  | 3977406-4110815     | 133410  | RPF4B, C6orf146, C6orf201, PEGI, BC040916, AK09244      | 0           | 1 | 0.00 | 0.00 |
| 10p#130496_130559 | 10 | 28689927-29725021   | 1035095 | BC043365, WAC, BAMBI, BC033839, LYZL1                   | 0           | 1 | 0.00 | 0.00 |
| 10p#130686_130687 | 10 | 31201784-31211950   | 10167   | ZNF438                                                  | 0           | 1 | 0.00 | 0.00 |
| 12p#150931_151039 | 12 | 2032959-2982747     | 949789  | AF220048, ITFG2, NRIP2, CR597751, FOXM1, C12orf         | 0           | 1 | 0.00 | 0.00 |
| 12p#151124_151135 | 12 | 3861298-4023212     | 161915  |                                                         | 0           | 1 | 0.00 | 0.00 |
| 15q#184964_184988 | 15 | 88817030-88992631   | 175602  | IQGAP1, CRTC3, AK090443                                 | 0           | 1 | 0.00 | 0.00 |
| 19q#209464_209499 | 19 | 38533240-38921217   | 387978  | CEBPG, PEPD, CR622600, CHST8                            | 0           | 1 | 0.00 | 0.00 |
| 19q#210152_210175 | 19 | 44828229-45034694   | 206466  | LOC400696, LGALS14, CLC, DYRK1B, FBL                    | 0           | 1 | 0.00 | 0.00 |
| 19q#210271_210342 | 19 | 4587735-46476289    | 598555  | 22029, CYP2B6, CYP2A13, CYP2F1, X03541, CYP2S1,         | 0           | 1 | 0.00 | 0.00 |
| 19q#210343_210497 | 19 | 46489983-47753868   | 1263886 | DMRTC2, RPS19, CD79A, ARHGEF1, AL832294, RABA           | 0           | 1 | 0.00 | 0.00 |
| 19q#210498_210510 | 19 | 47769622-47887956   | 118335  | AK096849, CEACAM8                                       | 0           | 1 | 0.00 | 0.00 |
| 1p#7373_7385      | 1  | 81301210-81579850   | 278641  | BC031321                                                | 0           | 1 | 0.00 | 0.00 |
| 1p#9082_9096      | 1  | 105179263-105688174 | 508912  |                                                         | 0           | 1 | 0.00 | 0.00 |
| 4p#54035_54042    | 4  | 806855-871723       | 64869   | CPLX1, GAK                                              | 0           | 1 | 0.00 | 0.00 |
| 1p#2016_2070      | 1  | 21470929-21989660   | 518732  | NBPF3, ALPL, RAP1GAP, USP48, LDLRAD2, HSPG2             | 0           | 1 | 0.00 | 0.00 |
| 1p#2077_2108      | 1  | 22053914-22495702   | 441789  | ELA3B, ELA3A, BC071749, CDC42, WNT4                     | 0           | 1 | 0.00 | 0.00 |
| 1p#2147_2204      | 1  | 22815853-23420085   | 604233  | CR607817, AOF2, LUZP1, AK093016, HTR1D, AL832124        | 0           | 1 | 0.00 | 0.00 |
| 1p#7758_7840      | 1  | 86293081-87262012   | 968932  | 856, ODF2L, CLCA2, CLCA1, CLCA4, CLCA3, SH3GLB1         | 0           | 1 | 0.00 | 0.00 |
| 1p#7924_7985      | 1  | 88938032-89469394   | 531363  | F2B, KAT3, GBP3, CR626456, GBP1, GBP2, GBP7, GB         | 0           | 1 | 0.00 | 0.00 |
| 1p#8343_8369      | 1  | 93768265-94031786   | 263522  | BCAR3, BC028477, AK090811                               | 0           | 1 | 0.00 | 0.00 |
| 1p#8990_8993      | 1  | 102963693-103030472 | 66780   |                                                         | 0           | 1 | 0.00 | 0.00 |
| 1p#9002_9006      | 1  | 103127007-103167165 | 40159   | COL11A1                                                 | 0           | 1 | 0.00 | 0.00 |
| 1p#9049_9069      | 1  | 104096196-104696872 | 600677  |                                                         | 0           | 1 | 0.00 | 0.00 |
| 1p#696_735        | 1  | 7880921-8381100     | 500180  | 776, TNFRSF9, PARK7, ERRF1, AK130268, AF118274,         | 0           | 1 | 0.00 | 0.00 |
| 1p#754_1105       | 1  | 8566004-11710805    | 3144802 | NNBIP1, LZIC, NMNAT1, RBP7, UBE4B, KIF1B, PGD, A        | 0           | 1 | 0.00 | 0.00 |
| 1p#1127_1168      | 1  | 11895538-12215521   | 319984  | KIAA2013, PLOD1, MFN2, IIP45, TNFRSF8, TNFRSF1B         | 0           | 1 | 0.00 | 0.00 |
| 1p#1189_1221      | 1  | 12418497-12728979   | 310483  | VPS13D, DHRS3, LOC343066, AK127828                      | 0           | 1 | 0.00 | 0.00 |
| 1p#1573_1574      | 1  | 17070367-17081555   | 11189   | ATP13A2                                                 | 0           | 1 | 0.00 | 0.00 |
| 1p#7485_7493      | 1  | 83381408-83582373   | 200966  |                                                         | 0           | 1 | 0.00 | 0.00 |
| 1p#7986_8069      | 1  | 89509592-90538432   | 1028841 | GBP6, AK055805, LRRC8B, LRRC8C, LRRC8D, ZNF326          | 0           | 1 | 0.00 | 0.00 |
| 1p#8451_8532      | 1  | 94986838-96165278   | 1178441 | BC033858, CNN3, ALG14, BC108263, TMEM56, BC0634         | 0           | 1 | 0.00 | 0.00 |
| 1p#8670_8696      | 1  | 97964751-98234475   | 269725  | DPYD, AK094607, FLJ35409                                | 0           | 1 | 0.00 | 0.00 |
| 5p#67499_67501    | 5  | 771310-802562       | 31253   | AF251188                                                | 1.398928118 | 1 | 0.03 | 0.02 |
| 1p#566_577        | 1  | 6661396-6787675     | 126280  | DNAJC11, CAMTA1                                         | 0           | 1 | 0.00 | 0.00 |
| 1p#1624_1904      | 1  | 17539523-20279308   | 2739786 | KIAA0090, C1orf33, AFAR3, AKR7A3, AK021589, AKR         | 0           | 1 | 0.00 | 0.00 |
| 9q#127802_127827  | 9  | 136736180-136910753 | 174574  | F161442, EGFL7, AGPAT2, FAM69B, AK054908, LCN1          | 0           | 1 | 0.00 | 0.00 |
| 2q#28938_28939    | 2  | 130680684-130700308 | 19625   |                                                         | 0           | 1 | 0.00 | 0.00 |
| 2q#27244_27246    | 2  | 104613764-104660743 | 46980   |                                                         | 0           | 1 | 0.00 | 0.00 |
| 2q#27255_27373    | 2  | 104916679-106605160 | 1688482 | R45, BC019841, TGFBRAP1, AK058000, MGC5509, BC0         | 0           | 1 | 0.00 | 0.00 |

|                   |    |                     |         |                                                   |   |   |      |      |
|-------------------|----|---------------------|---------|---------------------------------------------------|---|---|------|------|
| 2q#27475_27504    | 2  | 108456814-108739479 | 282666  | SULT1C2, GCC2, FLJ38668, AF527761, LIMS1          | 0 | 1 | 0.00 | 0.00 |
| 2q#27505_27523    | 2  | 108756880-108942850 | 185971  | LIMS1, RANBP2, FLJ32745                           | 0 | 1 | 0.00 | 0.00 |
| 2q#28940_28977    | 2  | 130715406-131489143 | 773738  | MP4, PTPN18, GPR148, FLJ38377, BC025667, AK0910   | 0 | 1 | 0.00 | 0.00 |
| 1p#310_323        | 1  | 3568451-3676892     | 108442  | FAM79A, WDR8, TP73, BC044603                      | 0 | 1 | 0.00 | 0.00 |
| 1p#324_329        | 1  | 3683208-3716255     | 33048   | KIAA0495, CCDC27                                  | 0 | 1 | 0.00 | 0.00 |
| 22q#222668_222669 | 22 | 28048420-28056658   | 8239    | AP1B1                                             | 0 | 1 | 0.00 | 0.00 |
| 2q#35083_35150    | 2  | 210794308-211513027 | 718720  | 3861, ACADL, LOC646215, MYL1, LANCL1, AB208800,   | 0 | 1 | 0.00 | 0.00 |
| 2q#35900_35926    | 2  | 219651582-219765671 | 114090  | R2, FEV, CRYBA2, DKFZp434O0527, BC034757, IHH, N  | 0 | 1 | 0.00 | 0.00 |
| 2q#35998_36004    | 2  | 220133722-220171860 | 38139   | AK126500, AY603755                                | 0 | 1 | 0.00 | 0.00 |
| 2q#36019_36031    | 2  | 220245980-220319837 | 73858   | AB014557, INHA, STK111P, SLC4A3                   | 0 | 1 | 0.00 | 0.00 |
| 3p#45416_45417    | 3  | 89133489-89145974   | 12486   | M19503                                            | 0 | 1 | 0.00 | 0.00 |
| 4q#59663_59668    | 4  | 82569422-82695022   | 125601  | EIF4E, D42084                                     | 0 | 1 | 0.00 | 0.00 |
| 4q#61136_61162    | 4  | 99986061-100308924  | 322864  | AK095596, ANK2                                    | 0 | 1 | 0.00 | 0.00 |
| 4q#62218_62250    | 4  | 114199505-114556625 | 357121  | ANK2, CAMK2D, ARSJ                                | 0 | 1 | 0.00 | 0.00 |
| 4q#62251_62324    | 4  | 114567840-115343145 | 775306  |                                                   | 0 | 1 | 0.00 | 0.00 |
| 10q#131331_131333 | 10 | 43243809-43264860   | 21052   |                                                   | 0 | 1 | 0.00 | 0.00 |
| 10q#131354_131406 | 10 | 43452869-44521528   | 1068660 | 03, ZNF32, S63912, AK054825, AK093142, DQ345579,  | 0 | 1 | 0.00 | 0.00 |
| 10q#131417_131481 | 10 | 44704087-45337699   | 633613  | 25, ZNF22, BC026193, BC043276, BC043208, AK098688 | 0 | 1 | 0.00 | 0.00 |
| 10q#131773_131778 | 10 | 51581040-51723602   | 142563  | ASAH2                                             | 0 | 1 | 0.00 | 0.00 |
| 15q#180996_181044 | 15 | 51161898-51919935   | 758038  | WDR72                                             | 0 | 1 | 0.00 | 0.00 |
| 15q#183834_183838 | 15 | 76775255-76834132   | 58878   |                                                   | 0 | 1 | 0.00 | 0.00 |
| 15q#185011_185022 | 15 | 89184954-89252301   | 67348   | FURIN, FES, D55649, MAN2A2                        | 0 | 1 | 0.00 | 0.00 |
| 15q#185468_185479 | 15 | 95080637-95145705   | 65069   | AL137758, SPATA8                                  | 0 | 1 | 0.00 | 0.00 |
| 19q#209199_209225 | 19 | 34326994-34776912   | 449919  | UQCRFS1, AK094793                                 | 0 | 1 | 0.00 | 0.00 |
| 19q#209234_209258 | 19 | 34829067-35094367   | 265301  | PLEKHF1, C19orf12, CCNE1                          | 0 | 1 | 0.00 | 0.00 |
| 2q#28303_28327    | 2  | 120344714-120576013 | 231300  | PTPN4, EPB41L5                                    | 0 | 1 | 0.00 | 0.00 |
| 2q#28338_28339    | 2  | 120704052-120711167 | 7116    |                                                   | 0 | 1 | 0.00 | 0.00 |
| 2q#28340_28350    | 2  | 120721977-120813797 | 91821   | RALB                                              | 0 | 1 | 0.00 | 0.00 |
| 2q#29283_29292    | 2  | 135547241-135621205 | 73965   | CCNT2, YSK4                                       | 0 | 1 | 0.00 | 0.00 |
| 2q#31517_31531    | 2  | 166472268-166580820 | 108553  | BC056246, AB082523, TTC21B                        | 0 | 1 | 0.00 | 0.00 |
| 2q#31683_31758    | 2  | 168625932-169456658 | 830727  | STK39, LASS6                                      | 0 | 1 | 0.00 | 0.00 |
| 2q#28851_28865    | 2  | 128714693-128933879 | 219187  | HS6ST1                                            | 0 | 1 | 0.00 | 0.00 |
| 3p#40471_40479    | 3  | 30550779-30655168   | 104390  | TGFB2                                             | 0 | 1 | 0.00 | 0.00 |
| 4p#54887_54893    | 4  | 9381938-9471410     | 89473   | AF073924, DRD5                                    | 0 | 1 | 0.00 | 0.00 |
| 4q#60936_60968    | 4  | 97005635-97742664   | 737030  | PDHA2, CR594710                                   | 0 | 1 | 0.00 | 0.00 |
| 4q#66196_66212    | 4  | 174116653-174270179 | 153527  | GALNT17                                           | 0 | 1 | 0.00 | 0.00 |
| 10q#131784_131845 | 10 | 51778762-52421609   | 642848  | TMEM23, AK130022, ACF, D45864                     | 0 | 1 | 0.00 | 0.00 |
| 10q#132014_132086 | 10 | 54103553-55461979   | 1358427 | MBL2, AF083130, PCDH15                            | 0 | 1 | 0.00 | 0.00 |
| 10q#132087_132164 | 10 | 55473084-56122476   | 649393  | PCDH15                                            | 0 | 1 | 0.00 | 0.00 |
| 10q#132171_132198 | 10 | 56165984-56494493   | 328510  | PCDH15, AK126923                                  | 0 | 1 | 0.00 | 0.00 |
| 19p#207579_207587 | 19 | 9728095-9803642     | 75548   | AK097652, FBXL12, CR592319, UBL5                  | 0 | 1 | 0.00 | 0.00 |
| 19p#207597_207604 | 19 | 9892231-9960911     | 68681   | OLFM2, COL5A3                                     | 0 | 1 | 0.00 | 0.00 |
| 21q#219228_219235 | 21 | 30929052-31014267   | 85216   |                                                   | 0 | 1 | 0.00 | 0.00 |
| 2q#28653_28663    | 2  | 125741880-126026003 | 284124  |                                                   | 0 | 1 | 0.00 | 0.00 |
| 2q#29831_29836    | 2  | 142445731-142491903 | 46173   | LRP1B                                             | 0 | 1 | 0.00 | 0.00 |
| 2q#29863_29880    | 2  | 142741830-143309561 | 567732  |                                                   | 0 | 1 | 0.00 | 0.00 |
| 2q#29896_30200    | 2  | 143548967-148768578 | 5219612 | TDC1, ZFHX1B, BX648102, BC040861, BC068242, M93   | 0 | 1 | 0.00 | 0.00 |
| 19p#207713_207726 | 19 | 10716707-10799643   | 82937   | DNM2                                              | 0 | 1 | 0.00 | 0.00 |
| 19p#208292_208317 | 19 | 15579264-15782828   | 203565  | CYP4F8, CYP4F3, CYP4F12, BC092420, OR10H1         | 0 | 1 | 0.00 | 0.00 |
| 21q#218660_218726 | 21 | 24718886-25781424   | 1062539 | AK124194, BX538159, BC040319, U03237, AY035382    | 0 | 1 | 0.00 | 0.00 |
| 21q#218752_218758 | 21 | 25950668-25993104   | 42437   | JAM2                                              | 0 | 1 | 0.00 | 0.00 |
| 21q#218759_218769 | 21 | 26000251-26066993   | 66743   | JAM2, ATP5J, GABPA                                | 0 | 1 | 0.00 | 0.00 |
| 21q#218770_218876 | 21 | 26071691-27237705   | 1166015 | APP, AK125338, CYYR1, ADAMTS1, ADAMTS5            | 0 | 1 | 0.00 | 0.00 |
| 21q#218900_218902 | 21 | 27666776-27694574   | 27799   | BC043580                                          | 0 | 1 | 0.00 | 0.00 |
| 21q#219351_219369 | 21 | 31862817-32028640   | 165824  | SOD1, SFRS15                                      | 0 | 1 | 0.00 | 0.00 |



|                   |    |                     |         |                                                     |     |   |      |      |
|-------------------|----|---------------------|---------|-----------------------------------------------------|-----|---|------|------|
| 1p#3739_3751      | 1  | 39331307-39450269   | 118963  | MACF1                                               | 0   | 1 | 0.00 | 0.00 |
| 1p#5891_5959      | 1  | 61817620-62442442   | 624823  | TM2D1, INADL, ECAT11, ANKRD38                       | 0   | 1 | 0.00 | 0.00 |
| 4q#67344_67362    | 4  | 190103492-190369794 | 266303  |                                                     | 0   | 1 | 0.00 | 0.00 |
| 11q#143406_143411 | 11 | 54893780-54948870   | 55091   |                                                     | 0   | 1 | 0.00 | 0.00 |
| 11q#143412_143429 | 11 | 54969741-55118273   | 148533  |                                                     | 0   | 1 | 0.00 | 0.00 |
| 15q#178829_179003 | 15 | 31112167-32428574   | 1316408 | RYR3, AVEN, CHR5, C15orf24, PGBD4, C15orf29, TM     | 0   | 1 | 0.00 | 0.00 |
| 15q#179035_179109 | 15 | 32796260-33412714   | 616455  | CX36, AK092087, ACTC, AQR, FLJ20582, BX537862       | 0   | 1 | 0.00 | 0.00 |
| 15q#179557_179619 | 15 | 38482309-38846182   | 363874  | D1, D4ST1, CR614561, CCDC32, RPU5D2, CASC5, RAL     | 0   | 1 | 0.00 | 0.00 |
| 15q#179967_180010 | 15 | 41346177-41638434   | 292258  | CMT2, ADAL, AK126583, BC017179, ZNF690, 76P, TP     | 0   | 1 | 0.00 | 0.00 |
| 15q#180021_180046 | 15 | 41776053-41930766   | 154714  | 126721, BC047442, PDIA3, ELL3, AK093233, HYPK, MF   | 0   | 1 | 0.00 | 0.00 |
| 15q#180047_180111 | 15 | 41936549-42499436   | 562888  | WDR76, BC051855, AK090572, FRMD5, CASC4             | 0   | 1 | 0.00 | 0.00 |
| 15q#180112_180194 | 15 | 42510976-43173192   | 662217  | IF3S1, KIAA1840, BC036924, AK130783, B2M, DQ2328    | 0   | 1 | 0.00 | 0.00 |
| 15q#180202_180255 | 15 | 43201403-43538335   | 336933  | 6267, SLC28A2, GATM, AK056979, BC039389, SPATA      | 0   | 1 | 0.00 | 0.00 |
| 15q#180256_180285 | 15 | 43543590-43756132   | 212543  | AK056686, SLC30A4, C15orf21, PLDN, SQRTL            | 0   | 1 | 0.00 | 0.00 |
| 15q#180313_180324 | 15 | 44390104-44753228   | 363125  |                                                     | 0   | 1 | 0.00 | 0.00 |
| 15q#180325_180327 | 15 | 44782045-44838145   | 56101   |                                                     | Inf | 1 | 0.02 | 0.00 |
| 19p#207551_207560 | 19 | 9401082-9495651     | 94570   | ZNF266, ZNF560, AK024250                            | 0   | 1 | 0.00 | 0.00 |
| 19p#207727_207822 | 19 | 10803520-11526070   | 722551  | SPAN16, RAB3D, AK127147, AK127284, LPPR2, C19orf    | 0   | 1 | 0.00 | 0.00 |
| 19p#207911_207946 | 19 | 12307863-12601172   | 293310  | VF443, BC014085, ZNF709, AK095600, ZNF564, AL834    | 0   | 1 | 0.00 | 0.00 |
| 21q#218639_218659 | 21 | 24169568-24705670   | 536103  | BC043533                                            | 0   | 1 | 0.00 | 0.00 |
| 19p#207333_207337 | 19 | 7498185-7514314     | 16130   | MCOLN1, NTE                                         | 0   | 1 | 0.00 | 0.00 |
| 1p#4769_4805      | 1  | 49252491-49647363   | 394873  | AK094826                                            | 0   | 1 | 0.00 | 0.00 |
| 2q#37794_37827    | 2  | 240707632-241063133 | 355502  | MYEOV2, OTOS                                        | 0   | 1 | 0.00 | 0.00 |
| 2q#37873_37877    | 2  | 241379994-241415107 | 35114   | KIF1A                                               | 0   | 1 | 0.00 | 0.00 |
| 2q#37878_37893    | 2  | 241429280-241570237 | 140958  | KIF1A, AGXT, FLJ22671                               | 0   | 1 | 0.00 | 0.00 |
| 3p#44686_44695    | 3  | 77144758-77225336   | 80579   | ROBO2                                               | 0   | 1 | 0.00 | 0.00 |
| 10q#134404_134413 | 10 | 83468135-83642196   | 174062  | NRG3                                                | 0   | 1 | 0.00 | 0.00 |
| 10q#135894_135934 | 10 | 99493823-99885327   | 391505  | YVE27, AF117758, SFRP5, C10orf132, CRTAC1, C10orf   | 0   | 1 | 0.00 | 0.00 |
| 15q#178766_178770 | 15 | 30405629-30694655   | 289027  | AK125576, AK024210                                  | 0   | 1 | 0.00 | 0.00 |
| 15q#179011_179012 | 15 | 32454294-32458925   | 4632    | GOLGA8A                                             | 0   | 1 | 0.00 | 0.00 |
| 19p#207426_207427 | 19 | 8200910-8207226     | 6317    | LASS4                                               | 0   | 1 | 0.00 | 0.00 |
| 19p#207461_207464 | 19 | 8483823-8503459     | 19637   | ZNF414, MYO1F                                       | 0   | 1 | 0.00 | 0.00 |
| 10q#136992_137001 | 10 | 111611178-111687691 | 76514   | XPNPEP1                                             | 0   | 1 | 0.00 | 0.00 |
| 10q#137116_137268 | 10 | 113285376-115330419 | 2045044 | TB, AC5L5, ZDHHC6, VTI1A, AK130806, AK074471, TCF   | 0   | 1 | 0.00 | 0.00 |
| 10q#137376_137427 | 10 | 116334631-116909840 | 575210  | BLIM1, AK057834, KIAA1600, BC037207, TRUB1, ATRN    | 0   | 1 | 0.00 | 0.00 |
| 10q#137502_137531 | 10 | 117551775-117852964 | 301190  | ATRN1, BX648964, GFRA1                              | 0   | 1 | 0.00 | 0.00 |
| 2q#37991_37999    | 2  | 242695990-242784149 | 88160   | AK125674, BC071667                                  | 0   | 1 | 0.00 | 0.00 |
| 10q#135231_135357 | 10 | 93590441-94737845   | 1147405 | f13, BTAF1, CPEB3, MARCH5, AK124121, IDE, KIF11, I  | 0   | 1 | 0.00 | 0.00 |
| 10q#135611_135719 | 10 | 97191229-98137296   | 946068  | ENTPD1, AK091396, C10orf130, CCNJ, ZNF518, CR600    | 0   | 1 | 0.00 | 0.00 |
| 10q#135794_135893 | 10 | 98796749-99482047   | 685299  | C009463, PGAM1, EXOSC1, ZDHHC16, MMS19L, UBT        | 0   | 1 | 0.00 | 0.00 |
| 10q#138803_138817 | 10 | 131758872-131892775 | 133904  | AK094118, CR592586, TXNL2, AK022131                 | 0   | 1 | 0.00 | 0.00 |
| 11q#143450_143459 | 11 | 55290734-55340649   | 49916   | OR5D13                                              | 0   | 1 | 0.00 | 0.00 |
| 11q#143879_143932 | 11 | 58810810-59252806   | 441997  | OR4D11, OR4D9, OSBP, FLJ36874, AL831992, BX53815    | 0   | 1 | 0.00 | 0.00 |
| 11q#144161_144183 | 11 | 61114431-61313297   | 198867  | 040894, AK095332, C11orf11, AL117582, C11orf9, C11o | 0   | 1 | 0.00 | 0.00 |
| 11q#144725_144726 | 11 | 65196885-65204658   | 7774    |                                                     | 0   | 1 | 0.00 | 0.00 |
| 15q#178057_178058 | 15 | 20768896-20773190   | 4295    |                                                     | 0   | 1 | 0.00 | 0.00 |
| 15q#178723_178737 | 15 | 29755311-29944455   | 189145  | BC035668                                            | 0   | 1 | 0.00 | 0.00 |
| 10q#134651_134681 | 10 | 86980895-87497480   | 516586  | BC041821, AL117638, AK097655, GRID1                 | 0   | 1 | 0.00 | 0.00 |
| 10q#135115_135230 | 10 | 92210553-93580733   | 1370181 | 5810, ANKRD1, BC029544, BC007377, PCGF5, BC044      | 0   | 1 | 0.00 | 0.00 |
| 10q#135720_135731 | 10 | 98144890-98258420   | 113531  | TLL2                                                | 0   | 1 | 0.00 | 0.00 |
| 10q#135781_135793 | 10 | 98693951-98786000   | 92050   | MLR2, C10orf12, AK025166, SLIT1                     | 0   | 1 | 0.00 | 0.00 |
| 10q#138818_138874 | 10 | 131909536-132705565 | 796030  |                                                     | 0   | 1 | 0.00 | 0.00 |
| 15q#178738_178750 | 15 | 29960724-30107791   | 147068  |                                                     | 0   | 1 | 0.00 | 0.00 |
| 15q#179013_179015 | 15 | 32482458-32511534   | 29077   | GOLGA8A, BX648160                                   | 0   | 1 | 0.00 | 0.00 |
| 19p#207157_207160 | 19 | 5847916-5860869     | 12954   | NDUFA11, VMAC                                       | 0   | 1 | 0.00 | 0.00 |

|                   |    |                     |         |                                                    |             |   |      |      |
|-------------------|----|---------------------|---------|----------------------------------------------------|-------------|---|------|------|
| 1p#9097_9109      | 1  | 105722935-106080285 | 357351  | BC043293, BC031278                                 | 0           | 1 | 0.00 | 0.00 |
| 1p#9110_9120      | 1  | 106107236-106433497 | 326262  |                                                    | 0           | 1 | 0.00 | 0.00 |
| 10q#134888_134895 | 10 | 89608496-89688292   | 79797   | PTEN                                               | 0           | 1 | 0.00 | 0.00 |
| 10q#135078_135098 | 10 | 91488621-91737885   | 249265  | MPHOSPH1, AK093219                                 | 0           | 1 | 0.00 | 0.00 |
| 1p#2071_2076      | 1  | 21995715-22048705   | 52991   | HSPG2                                              | 0           | 1 | 0.00 | 0.00 |
| 1p#2109_2146      | 1  | 22507208-22806676   | 299469  | ZBTB40, EPHA8, C1QA, C1QC, C1QB, EPHB2             | 0           | 1 | 0.00 | 0.00 |
| 1p#7386_7480      | 1  | 81596782-83289121   | 1692340 | BC031321, AK123422, LPHN2, BC043539                | 0           | 1 | 0.00 | 0.00 |
| 1p#7496_7546      | 1  | 83677197-84274079   | 596883  | BC036594, AK094174, TILL7, PRKACB                  | 0           | 1 | 0.00 | 0.00 |
| 1p#7661_7757      | 1  | 85352399-86284299   | 931901  | C1orf52, BCL10, AK125723, DDAH1, BX648145, CYR6    | 0           | 1 | 0.00 | 0.00 |
| 1p#7841_7923      | 1  | 87270238-88918782   | 1648545 | 022179, LOC339524, LMO4, BC043534, BC045705, AK1   | 0           | 1 | 0.00 | 0.00 |
| 4p#54043_54081    | 4  | 880103-1150598      | 270496  | 5KQ, SLC26A1, IDUA, FGFRL1, AK124578, LOC285498    | 0           | 1 | 0.00 | 0.00 |
| 1p#564_565        | 1  | 6648215-6655031     | 6817    | DNAJC11                                            | 0           | 1 | 0.00 | 0.00 |
| 1p#578_583        | 1  | 6797911-6840042     | 42132   | CAMTA1                                             | 0           | 1 | 0.00 | 0.00 |
| 1p#598_618        | 1  | 6980121-7191147     | 211027  | CAMTA1                                             | 0           | 1 | 0.00 | 0.00 |
| 1p#687_695        | 1  | 7816094-7864871     | 48778   | PER3, UTS2, BC025776                               | 0           | 1 | 0.00 | 0.00 |
| 1p#1575_1623      | 1  | 17091177-17527490   | 436314  | 11, PADI2, AK127830, PADI1, AK026652, PADI3, PADI4 | 0           | 1 | 0.00 | 0.00 |
| 1p#8533_8565      | 1  | 96180998-96838515   | 657518  | AK056049                                           | 0           | 1 | 0.00 | 0.00 |
| 1p#8626_8669      | 1  | 97587139-97957139   | 370001  | DPYD                                               | 0           | 1 | 0.00 | 0.00 |
| 5p#67502_67503    | 5  | 812169-819095       | 6927    | AF251188, AK096220                                 | 1.398928118 | 1 | 0.03 | 0.02 |
| 19p#206728_206763 | 19 | 2205013-2490255     | 285243  | Z1, C19orf35, LSM7, SPPL2B, TMPRSS9, TIMM13, LMI   | 0           | 1 | 0.00 | 0.00 |
| 4p#54112_54114    | 4  | 1463978-1480915     | 16938   |                                                    | 0           | 1 | 0.00 | 0.00 |
| 1p#349_404        | 1  | 3914626-4669900     | 755275  | AK124708, AK093498, AJAP1                          | 0           | 1 | 0.00 | 0.00 |
| 1p#406_411        | 1  | 4689479-4738922     | 49444   | AJAP1                                              | 0           | 1 | 0.00 | 0.00 |
| 21p#217871_217880 | 21 | 9896630-10022365    | 125736  | TPTE, BC090878                                     | 0           | 1 | 0.00 | 0.00 |
| 1p#294_298        | 1  | 3420807-3468003     | 47197   | MEGF6                                              | 0           | 1 | 0.00 | 0.00 |
| 1p#283_290        | 1  | 3338056-3394896     | 56841   | PRDM16, CR609468                                   | 0           | 1 | 0.00 | 0.00 |
| 1p#210_214        | 1  | 2562342-2599994     | 37653   | MMEL1, AK096384                                    | 0           | 1 | 0.00 | 0.00 |
| 6p#81689_81691    | 6  | 10476020-10492784   | 16765   |                                                    | 0           | 1 | 0.00 | 0.00 |
| 6p#81701_81704    | 6  | 10549386-10569664   | 20279   |                                                    | 0           | 1 | 0.00 | 0.00 |
| 6p#81713_81716    | 6  | 10645400-10664603   | 19204   | GCNT2                                              | 0           | 1 | 0.00 | 0.00 |
| 6p#81924_81936    | 6  | 13071396-13179969   | 108574  | PHACTR1                                            | 0           | 1 | 0.00 | 0.00 |
| 6p#82759_82812    | 6  | 24691854-25230928   | 539075  | THEM2, C6orf62, GMNN, AB002384, C6orf32, BC070382  | 0           | 1 | 0.00 | 0.00 |
| 1p#172_209        | 1  | 2313374-2553612     | 240239  | X10, AK12591, PLCH2, PANK4, AL359943, TNFRSF14,    | 0           | 1 | 0.00 | 0.00 |
| 1p#225_236        | 1  | 2794865-2950866     | 156002  |                                                    | 0           | 1 | 0.00 | 0.00 |
| 6p#81597_81618    | 6  | 8811135-9718449     | 907315  |                                                    | 0           | 1 | 0.00 | 0.00 |
| 10q#131247_131260 | 10 | 42184626-42301789   | 117164  | BC039000, MGC16291                                 | 0           | 1 | 0.00 | 0.00 |
| 10q#131749_131757 | 10 | 51177157-51236383   | 59227   | AF005043, MSMB                                     | 0           | 1 | 0.00 | 0.00 |
| 10q#131765_131768 | 10 | 51263742-51306259   | 42518   | TIMM23, AF005043                                   | 0           | 1 | 0.00 | 0.00 |
| 15q#185266_185269 | 15 | 91606534-91664288   | 57755   | AK094352                                           | 0           | 1 | 0.00 | 0.00 |
| 19q#209676_209679 | 19 | 40695690-40709061   | 13372   | ZD52F10, SBSN                                      | 0           | 1 | 0.00 | 0.00 |
| 19q#210040_210044 | 19 | 43986040-44003170   | 17131   | LGALS4, ECH1                                       | 0.692294348 | 1 | 0.02 | 0.02 |
| 19q#210054_210063 | 19 | 44076179-44113670   | 37492   | SIRT2, NFKBIB, SARS2, MRPS12                       | 0           | 1 | 0.00 | 0.00 |
| 19q#211368_211373 | 19 | 54977034-55008683   | 31650   | AP2A1, FLJ22688                                    | 0           | 1 | 0.00 | 0.00 |
| 19q#211374_211377 | 19 | 55012348-55032045   | 19698   | MED25                                              | 0           | 1 | 0.00 | 0.00 |
| 19q#211378_211443 | 19 | 55040624-55626593   | 585970  | 1, BC030222, VRK3, ZNF473, FLJ26850, C19orf41, AK1 | 0           | 1 | 0.00 | 0.00 |
| 19q#212470_212475 | 19 | 63704294-63738997   | 34704   | SLC27A5, ZNF499                                    | 0           | 1 | 0.00 | 0.00 |
| 2q#27164_27212    | 2  | 102770004-103779680 | 1009677 | SLC9A2, MGC11332, AL832688, FLJ30294               | 0           | 1 | 0.00 | 0.00 |
| 2q#28978_29005    | 2  | 131496659-131749450 | 252792  | AK127124, ARHGEF4, LOC130074, PLEKHB2              | 0           | 1 | 0.00 | 0.00 |
| 6p#83780_83782    | 6  | 32718991-32728546   | 9556    | HLA-DQA1, BC003593                                 | 0           | 1 | 0.00 | 0.00 |
| 2q#35966_35997    | 2  | 219966676-220129192 | 162517  | PTRN, RESP18, CR620362, DNPEP, CR611155, DES,      | 0           | 1 | 0.00 | 0.00 |
| 2q#36032_36033    | 2  | 220325128-220329534 | 4407    | SLC4A3                                             | 0           | 1 | 0.00 | 0.00 |
| 3p#45458_45462    | 3  | 89549453-89581254   | 31802   | EPHA3                                              | 0           | 1 | 0.00 | 0.00 |
| 5q#77562_77604    | 5  | 142015868-142438440 | 422573  | FGF1, M60515, AL833138, ARHGAP26                   | 0           | 1 | 0.00 | 0.00 |
| 6p#81206_81372    | 6  | 4122770-5871280     | 1748511 | KU-MEL-3, CDYL, RPP40, AK094934, C6orf149, FARS2   | 0           | 1 | 0.00 | 0.00 |
| 6p#81373_81398    | 6  | 5887191-6205288     | 318098  | BC036859, NRN1, F13A1                              | 0           | 1 | 0.00 | 0.00 |

|                   |    |                     |         |                                                   |     |   |      |      |
|-------------------|----|---------------------|---------|---------------------------------------------------|-----|---|------|------|
| 6p#81430_81448    | 6  | 6502407-6737445     | 235039  | FLJ33708, LY86, AK098571                          | 0   | 1 | 0.00 | 0.00 |
| 6p#81522_81574    | 6  | 7702882-8362735     | 659854  | BMP6, TXNDC5, EEF1E1, SLC35B3                     | 0   | 1 | 0.00 | 0.00 |
| 6p#83588_83605    | 6  | 31553631-31646250   | 92620   | BC050408, MICB, BAT1, ATP6V1G2, NFKBIL1           | 0   | 1 | 0.00 | 0.00 |
| 6p#83632_83684    | 6  | 31752412-31991192   | 238781  | C6orf25, DDAH2, CLIC1, MSH5, C6orf27, VARS, LSM2  | 0   | 1 | 0.00 | 0.00 |
| 6p#83685_83701    | 6  | 31995227-32104604   | 109378  | 11600, C2, CFB, RDBP, SKIV2L, DOM3Z, STK19, C4B,  | 0   | 1 | 0.00 | 0.00 |
| 6p#83702_83765    | 6  | 32119501-32558722   | 439222  | PPT2, EGFL8, AGPAT1, RNF5, AGER, PBX2, GPSPM      | 0   | 1 | 0.00 | 0.00 |
| 6p#83853_83864    | 6  | 33239071-33282571   | 43501   | COL11A2, RXRB, SLC39A7, HSD17B8                   | 0   | 1 | 0.00 | 0.00 |
| 6p#83957_83970    | 6  | 34002089-34187994   | 185906  | GRM4                                              | 0   | 1 | 0.00 | 0.00 |
| 6p#84137_84138    | 6  | 35609983-35623813   | 13831   |                                                   | 0   | 1 | 0.00 | 0.00 |
| 6p#84464_84482    | 6  | 38446383-38617667   | 171285  | BTBD9                                             | 0   | 1 | 0.00 | 0.00 |
| 10q#131272_131281 | 10 | 42407784-42544784   | 137001  | ZNF33B, AK123067, BC035410                        | 0   | 1 | 0.00 | 0.00 |
| 15q#180707_180710 | 15 | 48556319-48579109   | 22791   | USP8                                              | 0   | 1 | 0.00 | 0.00 |
| 15q#180711_180726 | 15 | 48589964-48728306   | 138343  | USP50, TRPM7                                      | 0   | 1 | 0.00 | 0.00 |
| 19q#210263_210270 | 19 | 45796914-45870880   | 73967   | LTPP4, LOC389286                                  | 0   | 1 | 0.00 | 0.00 |
| 19q#210536_210613 | 19 | 48500241-49071468   | 571228  | RCC1, AK129550, AK128554, IRGQ, ZNF576, C19orf37, | 0   | 1 | 0.00 | 0.00 |
| 2q#35078_35082    | 2  | 210738413-210779480 | 41068   | FLJ23861                                          | 0   | 1 | 0.00 | 0.00 |
| 3p#45436_45438    | 3  | 89364342-89375850   | 11509   | EPHA3                                             | 0   | 1 | 0.00 | 0.00 |
| 3p#45455_45457    | 3  | 89531802-89543933   | 12132   | EPHA3                                             | 0   | 1 | 0.00 | 0.00 |
| 4q#62652_62714    | 4  | 121200425-122155446 | 955022  | MAD2L1, PRDM5                                     | 0   | 1 | 0.00 | 0.00 |
| 4q#62715_62794    | 4  | 122164810-123166705 | 1001896 | 91, TNIP3, GPR103, ANXA5, FLJ30834, EXOSC9, CCNA  | 0   | 1 | 0.00 | 0.00 |
| 4q#62795_62805    | 4  | 123178828-123406045 | 227218  | TRPC3                                             | 0   | 1 | 0.00 | 0.00 |
| 4q#62806_62827    | 4  | 123425613-123602629 | 177017  | DQ335469                                          | 0   | 1 | 0.00 | 0.00 |
| 4q#62828_62850    | 4  | 123616768-123891686 | 274919  | DQ335469, Tenr, IL2, IL21                         | 0   | 1 | 0.00 | 0.00 |
| 4q#62851_62914    | 4  | 123896837-124475537 | 578701  | IL21, BC045668, FLJ35630, FGF2, NUDT6, SPATA5     | 0   | 1 | 0.00 | 0.00 |
| 4q#62954_63032    | 4  | 125095083-126714175 | 1619093 | BC033378, AK057455, ANKRD50, FAT4                 | 0   | 1 | 0.00 | 0.00 |
| 4q#63033_63058    | 4  | 126725295-127379225 | 653931  | FAT4, AK091292                                    | 0   | 1 | 0.00 | 0.00 |
| 4q#63068_63102    | 4  | 127744531-128607638 | 863108  |                                                   | 0   | 1 | 0.00 | 0.00 |
| 4q#63103_63106    | 4  | 128626078-128681703 | 55626   |                                                   | 0   | 1 | 0.00 | 0.00 |
| 4q#63191_63201    | 4  | 129699773-129969547 | 269775  | AK093416                                          | 0   | 1 | 0.00 | 0.00 |
| 4q#63248_63296    | 4  | 130526918-131913589 | 1386672 | BC035172, BC041448                                | 0   | 1 | 0.00 | 0.00 |
| 4q#63303_63311    | 4  | 132159513-132472311 | 312799  |                                                   | 0   | 1 | 0.00 | 0.00 |
| 4q#63480_63494    | 4  | 136256883-136740782 | 483900  |                                                   | 0   | 1 | 0.00 | 0.00 |
| 4q#65345_65346    | 4  | 162728615-162733937 | 5323    | FSTL5                                             | 0   | 1 | 0.00 | 0.00 |
| 4q#65347_65422    | 4  | 162739367-163431176 | 691810  | FSTL5                                             | 0   | 1 | 0.00 | 0.00 |
| 4q#65423_65427    | 4  | 163442471-163522126 | 79656   | FSTL5                                             | 0   | 1 | 0.00 | 0.00 |
| 4q#65428_65430    | 4  | 163575361-163643755 | 68395   |                                                   | 0   | 1 | 0.00 | 0.00 |
| 4q#65431_65446    | 4  | 163669203-164190447 | 521245  |                                                   | 0   | 1 | 0.00 | 0.00 |
| 4q#65467_65576    | 4  | 164611229-165908711 | 1297483 | NPY1R, NPY5R, TKTL2, FLJ11184, MARCH1, AL713759   | 0   | 1 | 0.00 | 0.00 |
| 10p#130396_130408 | 10 | 27653437-27745932   | 92496   | PTCHD3                                            | Inf | 1 | 0.02 | 0.00 |
| 10q#131282_131295 | 10 | 42566456-42850656   | 284201  | BMS1L                                             | 0   | 1 | 0.00 | 0.00 |
| 10q#131334_131353 | 10 | 43269919-43448145   | 178227  | AK127450, ZNF239, ZNF485, BC033403                | 0   | 1 | 0.00 | 0.00 |
| 10q#131769_131772 | 10 | 51450856-51496232   | 45377   | AK127766                                          | 0   | 1 | 0.00 | 0.00 |
| 15q#180696_180706 | 15 | 48482677-48551329   | 68653   | USP8                                              | 0   | 1 | 0.00 | 0.00 |
| 15q#183839_183843 | 15 | 76841291-76879980   | 38690   | ADAMTS7                                           | 0   | 1 | 0.00 | 0.00 |
| 2q#27968_27992    | 2  | 115362605-115589390 | 226786  | DPP10                                             | 0   | 1 | 0.00 | 0.00 |
| 2q#28328_28337    | 2  | 120587008-120695366 | 108359  | EPB41L5, AF530474                                 | 0   | 1 | 0.00 | 0.00 |
| 2q#28929_28931    | 2  | 130483490-130503078 | 19589   | LOC440905                                         | 0   | 1 | 0.00 | 0.00 |
| 2q#29105_29135    | 2  | 133316118-133674780 | 358663  | AK124659, AY946007, FLJ34870                      | 0   | 1 | 0.00 | 0.00 |
| 2q#29243_29282    | 2  | 135160681-135539040 | 378360  | DKFZP566N034, AL122044, ACMSD, CR627263, CCNT2,   | 0   | 1 | 0.00 | 0.00 |
| 2q#29293_29312    | 2  | 135627774-135791308 | 163535  | RAB3GAP1, AL136824                                | 0   | 1 | 0.00 | 0.00 |
| 3p#40299_40390    | 3  | 28046129-29437173   | 1391045 | GC61571, AZI2, BC094696, ZCWPW2, AK090970, RBM4,  | 0   | 1 | 0.00 | 0.00 |
| 3p#40402_40470    | 3  | 29556608-30518104   | 961497  | RBMS3                                             | 0   | 1 | 0.00 | 0.00 |
| 4q#61859_61867    | 4  | 109654360-109849038 | 194679  | AK094992                                          | 0   | 1 | 0.00 | 0.00 |
| 4q#62062_62115    | 4  | 111771333-112833532 | 1062200 | ENPEP, PITX2, AK127829                            | 0   | 1 | 0.00 | 0.00 |
| 4q#62116_62174    | 4  | 112889399-113794262 | 904864  | FLJ39370, C4orf16, TIFA, AK026323, ALPK1, NEUROG4 | 0   | 1 | 0.00 | 0.00 |

|                   |                     |         |                                                   |   |   |      |      |
|-------------------|---------------------|---------|---------------------------------------------------|---|---|------|------|
| 4q#62175_62214    | 113798531-114140213 | 341683  | LOC91431, C4orf21, BC066945, HDCMA18P, AK095596   | 0 | 1 | 0.00 | 0.00 |
| 4q#62215_62217    | 114159634-114186986 | 27353   | AK095596                                          | 0 | 1 | 0.00 | 0.00 |
| 4q#62325_62332    | 115393278-115598439 | 205162  |                                                   | 0 | 1 | 0.00 | 0.00 |
| 4q#62341_62353    | 115875473-116069501 | 194029  | AK127970, UGT8                                    | 0 | 1 | 0.00 | 0.00 |
| 4q#62392_62478    | 116431084-119011869 | 2580786 | BC050298, TRAM1L1                                 | 0 | 1 | 0.00 | 0.00 |
| 4q#63207_63213    | 130087679-130135690 | 48012   | PHF17                                             | 0 | 1 | 0.00 | 0.00 |
| 10q#131482_131483 | 45350690-45358281   | 7592    | MARCH8                                            | 0 | 1 | 0.00 | 0.00 |
| 21q#219592_219607 | 33876054-33982555   | 106502  | DONSON, CRYZL1, ITSM1                             | 0 | 1 | 0.00 | 0.00 |
| 2q#28037_28161    | 115999706-118554439 | 2554734 | DPP10, DDX18, CCDC93                              | 0 | 1 | 0.00 | 0.00 |
| 2q#28289_28302    | 120236454-120334139 | 97686   | PTPN4                                             | 0 | 1 | 0.00 | 0.00 |
| 2q#28351_28379    | 120822517-121289104 | 466588  | INHBB, FLJ14816, DQ004397, GLI2                   | 0 | 1 | 0.00 | 0.00 |
| 2q#28380_28383    | 121302555-121327435 | 24881   | GLI2                                              | 0 | 1 | 0.00 | 0.00 |
| 2q#28397_28403    | 121456213-121576745 | 120533  | GLI2                                              | 0 | 1 | 0.00 | 0.00 |
| 2q#29626_29639    | 140295374-140478546 | 183173  |                                                   | 0 | 1 | 0.00 | 0.00 |
| 2q#29780_29830    | 141969138-142429298 | 460161  | LRP1B                                             | 0 | 1 | 0.00 | 0.00 |
| 2q#29837_29862    | 142501622-142729634 | 228013  | LRP1B                                             | 0 | 1 | 0.00 | 0.00 |
| 2q#30201_30378    | 148789393-151562468 | 2773076 | 21, AB011103, LOC130576, MGC52057, C2orf25, FLJ32 | 0 | 1 | 0.00 | 0.00 |
| 2q#31891_31905    | 170603480-170737968 | 134489  | AK128490, ZNF650                                  | 0 | 1 | 0.00 | 0.00 |
| 2q#31938_32152    | 171050540-173270748 | 2220209 | ASP2, TLK1, AK090779, METTL8, C2orf37, CYBRD1, D  | 0 | 1 | 0.00 | 0.00 |
| 2q#32153_32223    | 173283152-173962857 | 679706  | PDK1, CR594556, AL157450, RAPGEF4, ZAK, BC04056   | 0 | 1 | 0.00 | 0.00 |
| 2q#32224_32294    | 173975926-174937073 | 961148  | CDCAT, SP3, PTD004                                | 0 | 1 | 0.00 | 0.00 |
| 2q#28647_28652    | 125562796-125705740 | 142945  |                                                   | 0 | 1 | 0.00 | 0.00 |
| 2q#28664_28682    | 126061065-126632478 | 571414  |                                                   | 0 | 1 | 0.00 | 0.00 |
| 2q#28845_28850    | 128633238-128685583 | 52346   | UGCGL1                                            | 0 | 1 | 0.00 | 0.00 |
| 19p#207562_207578 | 9504590-9707178     | 202589  | ZNF426, ZNF121, ZNF561, BC036632, ZNF562          | 0 | 1 | 0.00 | 0.00 |
| 19p#207588_207596 | 9812885-9884957     | 72073   | PIN1, OLFM2                                       | 0 | 1 | 0.00 | 0.00 |
| 2q#28737_28754    | 127731181-127879630 | 148450  | ERCC3, AK093893, MAP3K2, AF370412                 | 0 | 1 | 0.00 | 0.00 |
| 1p#4806_4850      | 49664463-50251615   | 587153  | AK094826, CR595508                                | 0 | 1 | 0.00 | 0.00 |
| 1p#5519_5524      | 57322932-57359189   | 36258   | DAB1                                              | 0 | 1 | 0.00 | 0.00 |
| 1p#5624_5662      | 58257959-58677593   | 419635  | DAB1, AF263547, OMA1                              | 0 | 1 | 0.00 | 0.00 |
| 1p#5704_5778      | 59165401-60062573   | 897173  | FLJ10986, BC042048, HOOK1                         | 0 | 1 | 0.00 | 0.00 |
| 1p#5787_5813      | 60161428-60748376   | 586949  | C1orf87, AF279783                                 | 0 | 1 | 0.00 | 0.00 |
| 1p#5814_5890      | 60768439-61796066   | 1027628 | AF279783, AK097193, BC030753, NFIA                | 0 | 1 | 0.00 | 0.00 |
| 1p#6141_6176      | 64549069-64955513   | 406445  | CACHD1, BC039301, RAVR2                           | 0 | 1 | 0.00 | 0.00 |
| 1p#6177_6194      | 64967138-65182343   | 215206  | RAVR2, JAK1, BC062431, AK126239                   | 0 | 1 | 0.00 | 0.00 |
| 11q#143430_143434 | 55124730-55158137   | 33408   |                                                   | 0 | 1 | 0.00 | 0.00 |
| 11q#144074_144109 | 60414778-60705552   | 290775  | PF19, TMEM109, TMEM132A, SLC15A3, CD6, CD5, VPS   | 0 | 1 | 0.00 | 0.00 |
| 15q#179004_179009 | 32431027-32443547   | 12521   | NUT, AGPAT7                                       | 0 | 1 | 0.00 | 0.00 |
| 15q#179031_179034 | 32676783-32751494   | 74712   |                                                   | 0 | 1 | 0.00 | 0.00 |
| 15q#180195_180201 | 43176993-43198489   | 21497   | DUOX2, LOC405753, NIP                             | 0 | 1 | 0.00 | 0.00 |
| 19p#207471_207493 | 8572581-8840461     | 267881  | ADAMTS10, MGC33407, ZNF558, MBD3L1, MUC16         | 0 | 1 | 0.00 | 0.00 |
| 19p#207947_207960 | 12605731-12682224   | 76494   | MAN2B1, PTD008, MORG1, DHPS, FBXW9, TNPO2         | 0 | 1 | 0.00 | 0.00 |
| 19p#207961_208075 | 12692435-13710268   | 1017834 | , GCDH, CR620067, FARSLA, CALR, RAD23A, GADD4     | 0 | 1 | 0.00 | 0.00 |
| 10q#138019_138032 | 123059384-123162436 | 103053  | AB030073                                          | 0 | 1 | 0.00 | 0.00 |
| 19p#207174_207218 | 5995361-6384669     | 389309  | MILLT1, ASAH3, CLPP, ALKBH7, AK055490, GTF2F1, KH | 0 | 1 | 0.00 | 0.00 |
| 19p#207338_207340 | 7520673-7534172     | 13500   | NTE                                               | 0 | 1 | 0.00 | 0.00 |
| 1p#6700_6716      | 71342416-71598515   | 256100  | BC054887, NEGR1                                   | 0 | 1 | 0.00 | 0.00 |
| 10q#131501_131502 | 46371243-46385023   | 13781   | SYT15                                             | 0 | 1 | 0.00 | 0.00 |
| 10q#134414_134503 | 83652547-84433671   | 781125  | NRG3                                              | 0 | 1 | 0.00 | 0.00 |
| 10q#134504_134510 | 84442887-84499809   | 56923   | NRG3                                              | 0 | 1 | 0.00 | 0.00 |
| 10q#134566_134569 | 85561872-85647388   | 85517   |                                                   | 0 | 1 | 0.00 | 0.00 |
| 10q#134570_134649 | 85672496-86898096   | 1225601 | 10orf99, PCDH21, LRRC22, LRRC21, RGR, AK056561,   | 0 | 1 | 0.00 | 0.00 |
| 10q#135935_136222 | 99894437-102589002  | 2694566 | 264, COX15, CUTC, ABCC2, DNMBP, AL833283, CPN1    | 0 | 1 | 0.00 | 0.00 |
| 11q#143720_143727 | 57319597-57412086   | 92490   | CTNND1                                            | 0 | 1 | 0.00 | 0.00 |
| 15q#178764_178765 | 30249934-30298155   | 48222   | AK125576                                          | 0 | 1 | 0.00 | 0.00 |

|                   |    |                     |         |                                                     |   |   |      |      |
|-------------------|----|---------------------|---------|-----------------------------------------------------|---|---|------|------|
| 19p#207399_207425 | 19 | 7916206-8189273     | 273068  | ELAVL1, AY203940, CCL25, FBN3, LASS4                | 0 | 1 | 0.00 | 0.00 |
| 19p#207465_207467 | 19 | 8511765-8534877     | 23113   | MYO1F                                               | 0 | 1 | 0.00 | 0.00 |
| 21q#217941_217963 | 21 | 14517303-14659554   | 142252  | RBM11, ABCC13, AF418600                             | 0 | 1 | 0.00 | 0.00 |
| 10q#137792_137867 | 10 | 120809152-121420943 | 611792  | S10, FAM45A, SFXN4, PRDX3, GRK5, RGS10, TIAL1, E    | 0 | 1 | 0.00 | 0.00 |
| 10q#136788_136867 | 10 | 107369433-108722262 | 1352830 | BC036309, BC028293, SORCS1                          | 0 | 1 | 0.00 | 0.00 |
| 10q#136894_136991 | 10 | 109029157-111595445 | 2566289 | BC045687                                            | 0 | 1 | 0.00 | 0.00 |
| 10q#137868_137896 | 10 | 121426818-121640793 | 213976  | BAG3, INPP5F, AL137528, C10orf119                   | 0 | 1 | 0.00 | 0.00 |
| 1p#9121_9174      | 1  | 106457644-107579387 | 1121744 | PRMT6, NTNG1                                        | 0 | 1 | 0.00 | 0.00 |
| 1p#9175_9194      | 1  | 107587265-107761458 | 174194  | NTNG1                                               | 0 | 1 | 0.00 | 0.00 |
| 1p#9195_9247      | 1  | 107771331-108355949 | 584619  | VAV3                                                | 0 | 1 | 0.00 | 0.00 |
| 1p#9258_9263      | 1  | 108467581-108638414 | 170834  | AF211971                                            | 0 | 1 | 0.00 | 0.00 |
| 1p#9705_9790      | 1  | 112703607-113631265 | 927659  | STTL, CAPZA1, AF338193, MOV10, RHOC, PPM1J, FAM     | 0 | 1 | 0.00 | 0.00 |
| 10q#134682_134748 | 10 | 87504374-88063763   | 559390  | GRID1                                               | 0 | 1 | 0.00 | 0.00 |
| 10q#134850_134887 | 10 | 89253592-89600925   | 347334  | MINPP1, PAPSS2, ATAD1, BC031631                     | 0 | 1 | 0.00 | 0.00 |
| 10q#135099_135114 | 10 | 91750698-92200277   | 449580  | BC030278                                            | 0 | 1 | 0.00 | 0.00 |
| 1p#1476_1488      | 1  | 16070121-16119672   | 49552   | AF085964, C1orf64, HSPB7, CLCNKA, CLCNKB            | 0 | 1 | 0.00 | 0.00 |
| 10q#134755_134770 | 10 | 88130502-88267390   | 136889  | WAPAL                                               | 0 | 1 | 0.00 | 0.00 |
| 1p#1535_1538      | 1  | 16516152-16531799   | 15648   | NECAP2                                              | 0 | 1 | 0.00 | 0.00 |
| 1p#7629_7660      | 1  | 85054712-85337189   | 282478  | MCOLN2, BX64851, MCOLN3, WDR63                      | 0 | 1 | 0.00 | 0.00 |
| 1p#1222_1227      | 1  | 12740597-12774512   | 33916   | C1orf158, AK026705                                  | 0 | 1 | 0.00 | 0.00 |
| 1p#1236_1332      | 1  | 13002452-14937190   | 1934739 | AF336885, PDPN, PRDM2, KIAA1026                     | 0 | 1 | 0.00 | 0.00 |
| 1p#1567_1572      | 1  | 17030134-17062672   | 32539   | CROCC, MFAP2, AK130020, ATP13A2                     | 0 | 1 | 0.00 | 0.00 |
| 1p#7481_7484      | 1  | 83298495-83359857   | 61363   | BC043539                                            | 0 | 1 | 0.00 | 0.00 |
| 1p#7494_7495      | 1  | 83603746-83635088   | 31343   |                                                     | 0 | 1 | 0.00 | 0.00 |
| 4p#54082_54088    | 4  | 1153155-1204745     | 51591   | SPON2, CR627052, CTBP1                              | 0 | 1 | 0.00 | 0.00 |
| 19p#206837_206857 | 19 | 3093380-3302640     | 209261  | GNA15, NCLN, BRUNOL5                                | 0 | 1 | 0.00 | 0.00 |
| 19p#206764_206787 | 19 | 2506088-2715083     | 208996  | GNG7, AK024373, DIRAS1, SLC39A3, SGTA               | 0 | 1 | 0.00 | 0.00 |
| 1p#584_597        | 1  | 6855700-6969341     | 113642  | CAMTA1                                              | 0 | 1 | 0.00 | 0.00 |
| 1p#619_686        | 1  | 7202260-7805632     | 603373  | CAMTA1, VAMP3, PER3                                 | 0 | 1 | 0.00 | 0.00 |
| 1p#1333_1435      | 1  | 14946536-15768725   | 822190  | 7963, BC045184, EFHD2, CTRC, ELA2A, ELA2B, CASP     | 0 | 1 | 0.00 | 0.00 |
| 1p#8566_8625      | 1  | 96855364-97572634   | 717271  | PTBP2, DPYD                                         | 0 | 1 | 0.00 | 0.00 |
| 4p#54089_54090    | 4  | 1218281-1225178     | 6898    | CTBP1                                               | 0 | 1 | 0.00 | 0.00 |
| 1p#512_547        | 1  | 6275759-6566937     | 291179  | OT7, HES2, ESPN, TNFRSF25, PLEKHG5, NOL9, TAS1      | 0 | 1 | 0.00 | 0.00 |
| 1p#560_563        | 1  | 6628657-6641091     | 12435   | THAP3, DNAJC11                                      | 0 | 1 | 0.00 | 0.00 |
| 1p#2398_2404      | 1  | 25318800-25402337   | 83538   | C1orf63, BC041843, RHD                              | 0 | 1 | 0.00 | 0.00 |
| 4p#54115_54117    | 4  | 1488174-1508063     | 19890   |                                                     | 0 | 1 | 0.00 | 0.00 |
| 1p#330_336        | 1  | 3720216-3762639     | 42424   | LRRC47, KIAA0562                                    | 0 | 1 | 0.00 | 0.00 |
| 19p#206488_206489 | 19 | 544916-551072       | 6157    | HCN2                                                | 0 | 1 | 0.00 | 0.00 |
| 1p#291_292        | 1  | 3399732-3406143     | 6412    | CR609468, ARHGEF16                                  | 0 | 1 | 0.00 | 0.00 |
| 1p#263_280        | 1  | 3157982-3307497     | 149516  | PRDM16                                              | 0 | 1 | 0.00 | 0.00 |
| 22q#223041_223049 | 22 | 30563744-30616079   | 52336   | DEPDC5                                              | 0 | 1 | 0.00 | 0.00 |
| 22q#223069_223103 | 22 | 30770787-31068483   | 297697  | C5A1, LOC150297, RFFL2, BC051910, SLC5A4, BX648     | 0 | 1 | 0.00 | 0.00 |
| 1p#215_217        | 1  | 2614922-2665574     | 50653   |                                                     | 0 | 1 | 0.00 | 0.00 |
| 1p#218_224        | 1  | 2717889-2784541     | 66653   |                                                     | 0 | 1 | 0.00 | 0.00 |
| 1p#237_241        | 1  | 2955843-2975533     | 19691   |                                                     | 0 | 1 | 0.00 | 0.00 |
| 1p#242_244        | 1  | 2980340-2999635     | 19296   | AL713743                                            | 0 | 1 | 0.00 | 0.00 |
| 1p#245_246        | 1  | 3013052-3019932     | 6881    | PRDM16                                              | 0 | 1 | 0.00 | 0.00 |
| 1p#247_261        | 1  | 3029282-3144135     | 114854  | PRDM16                                              | 0 | 1 | 0.00 | 0.00 |
| 1p#281_282        | 1  | 3317166-3332103     | 14938   | PRDM16                                              | 0 | 1 | 0.00 | 0.00 |
| 1p#337_345        | 1  | 3769452-3823263     | 53812   | PRDM16                                              | 0 | 1 | 0.00 | 0.00 |
| 1p#346_348        | 1  | 3828805-3842289     | 13485   | KIAA0562, DFFB                                      | 0 | 1 | 0.00 | 0.00 |
| 1p#412_450        | 1  | 4753696-5644605     | 890910  | C1orf174                                            | 0 | 1 | 0.00 | 0.00 |
| 1p#451_472        | 1  | 5676854-5983997     | 307144  | AJAP1, CR936609, AK125078                           | 0 | 1 | 0.00 | 0.00 |
| 1p#473_511        | 1  | 5996910-6265668     | 268759  | BC039532, NPHP4                                     | 0 | 1 | 0.00 | 0.00 |
| 1p#548_559        | 1  | 6572226-6628516     | 56291   | RPL22, FLJ46380, C1orf188, ICMT, C1orf211, CR627473 | 0 | 1 | 0.00 | 0.00 |
|                   |    |                     |         | TAS1R1, HKR3, KLHL21, PHF13, AY069975, THAP3        | 0 | 1 | 0.00 | 0.00 |

|                |   |                     |         |                                                      |             |   |      |      |
|----------------|---|---------------------|---------|------------------------------------------------------|-------------|---|------|------|
| 1p#1436_1474   | 1 | 15775356-16060290   | 284935  | 8595, BC019895, FBLIM1, CR604326, BX537499, AK124    | 0           | 1 | 0.00 | 0.00 |
| 1p#1490_1492   | 1 | 16132878-16143280   | 10403   | C1orf117                                             | 0           | 1 | 0.00 | 0.00 |
| 1p#1493_1528   | 1 | 16152483-16467965   | 315483  | EPHA2, ARHGEF19, C1orf89, FBXO42, C1orf144           | 0           | 1 | 0.00 | 0.00 |
| 1p#1529_1534   | 1 | 16469124-16508856   | 39733   | AK130020, SPATA21                                    | 0           | 1 | 0.00 | 0.00 |
| 1p#1547_1548   | 1 | 16693433-16708938   | 15506   | AK130020                                             | Inf         | 1 | 0.02 | 0.00 |
| 1p#4902_4911   | 1 | 50861804-50942942   | 81139   | FAF1                                                 | 0           | 1 | 0.00 | 0.00 |
| 1p#4912_4914   | 1 | 50953513-50969827   | 16315   | FAF1                                                 | 0           | 1 | 0.00 | 0.00 |
| 1p#4915_5019   | 1 | 50979300-52125363   | 1146064 | 995, AK127900, RNF11, AF007170, EPS15, AK128043,     | 0           | 1 | 0.00 | 0.00 |
| 1p#5020_5067   | 1 | 52139303-52588836   | 449534  | B, TXNDC12, BTF3L4, ZFYVE9, CC2D1B, ORC1L, PRF       | 0           | 1 | 0.00 | 0.00 |
| 1p#5068_5186   | 1 | 52595789-53635638   | 1039850 | ZYG11B, ZYG11A, ECHDC2, SCP2, PODN, SLC1A7, CF       | 0           | 1 | 0.00 | 0.00 |
| 1p#5187_5209   | 1 | 53642491-53827999   | 185509  | DMRTB1, GLIS1                                        | 0           | 1 | 0.00 | 0.00 |
| 1p#5210_5268   | 1 | 53834130-54289744   | 455615  | EM48, YIPF1, DIO1, C1orf41, LRRC42, LDLRAD1, TMEM    | 0           | 1 | 0.00 | 0.00 |
| 1p#5282_5324   | 1 | 54380632-54851718   | 471087  | RPL37, SSBP3, AK091112, ACO111, AB014607, C1orf1     | 0           | 1 | 0.00 | 0.00 |
| 1p#5477_5518   | 1 | 56944921-57311520   | 366600  | C1orf168, C8A, C8B, DAB1                             | 0           | 1 | 0.00 | 0.00 |
| 1p#5525_5623   | 1 | 57368524-58250331   | 881808  | DAB1                                                 | 0           | 1 | 0.00 | 0.00 |
| 1p#5663_5703   | 1 | 58683866-59118994   | 435129  | DMA1, TACSTD2, AB067502, CR627323, JUN, AK05515      | 0           | 1 | 0.00 | 0.00 |
| 1p#5779_5786   | 1 | 60068837-60152251   | 83415   | CYP2J2                                               | 0           | 1 | 0.00 | 0.00 |
| 1p#5960_5977   | 1 | 62451989-62651667   | 199679  | ANKRD38, USP1, DOCK7                                 | 0           | 1 | 0.00 | 0.00 |
| 1p#5978_6059   | 1 | 62666634-63711178   | 1044545 | 7, BC030752, ATG4C, BC040309, ALG6, ITGB3BP, KIA     | 0           | 1 | 0.00 | 0.00 |
| 1p#6259_6308   | 1 | 65787781-66346820   | 559040  | LEPR, BC036581, PDE4B                                | 0           | 1 | 0.00 | 0.00 |
| 1p#6343_6352   | 1 | 66739255-66821292   | 82038   | SGIP1                                                | 0           | 1 | 0.00 | 0.00 |
| 1p#6353_6415   | 1 | 66834961-67408450   | 573490  | EX1D1, INSL5, WDR78, MIER1, D87449, SLC35D1, C1c     | 0           | 1 | 0.00 | 0.00 |
| 1p#6416_6420   | 1 | 67417933-67459591   | 41659   | IL23R                                                | 0           | 1 | 0.00 | 0.00 |
| 1p#6421_6446   | 1 | 67471993-67844393   | 372401  | IL12RB2, SERBP1                                      | 0           | 1 | 0.00 | 0.00 |
| 1p#6464_6500   | 1 | 67973791-68387023   | 413233  | GNG12, AK124028, DIRAS3, GPR177                      | 0           | 1 | 0.00 | 0.00 |
| 1p#6501_6511   | 1 | 68394885-68541789   | 146905  | GPR177                                               | 0           | 1 | 0.00 | 0.00 |
| 1p#6527_6553   | 1 | 68682417-69454106   | 771690  | BC016787, BC041050                                   | 0           | 1 | 0.00 | 0.00 |
| 1p#6554_6587   | 1 | 69501916-70051344   | 549429  | BC080568, AF498274, LRRC7                            | 0           | 1 | 0.00 | 0.00 |
| 1p#6588_6699   | 1 | 70070265-71316699   | 1246435 | FRS11, ANKRD13C, HHLA3, CTH, BC041441, PTGER3,       | 0           | 1 | 0.00 | 0.00 |
| 1p#6717_6724   | 1 | 71607350-71676522   | 69173   | NEGR1                                                | 0           | 1 | 0.00 | 0.00 |
| 1p#6725_6825   | 1 | 71691174-73004895   | 1313722 | NEGR1, BC043521                                      | 0           | 1 | 0.00 | 0.00 |
| 1p#6826_6834   | 1 | 73021689-73340894   | 319206  |                                                      | 0           | 1 | 0.00 | 0.00 |
| 1p#6835_6843   | 1 | 73377164-73590806   | 213643  | BC041341                                             | 0           | 1 | 0.00 | 0.00 |
| 1p#9264_9267   | 1 | 108726439-108776488 | 50050   | AF211971                                             | 0           | 1 | 0.00 | 0.00 |
| 1q#10374_10384 | 1 | 142444242-142532085 | 87844   | NBPF1                                                | Inf         | 1 | 0.02 | 0.00 |
| 1q#11101_11120 | 1 | 150303528-150426725 | 123198  | S100A5, S100A2, S100A16, S100A14, S100A13, C1orf7    | Inf         | 1 | 0.02 | 0.00 |
| 1q#11121_11154 | 1 | 150428709-150638192 | 209484  | 18362, SNAPAP, ILF2, NPR1, INTS3, SLC27A3, GATAD     | Inf         | 1 | 0.02 | 0.00 |
| 1q#15445_15451 | 1 | 199717225-199747581 | 30357   | C1orf37                                              | 1.044194198 | 1 | 0.05 | 0.05 |
| 2q#27247_27254 | 2 | 104721618-104909310 | 187693  | AK096621, AK096498                                   | 0           | 1 | 0.00 | 0.00 |
| 2q#27374_27474 | 2 | 106614640-108446096 | 1831457 | CR626349, AK097754, SLC5A7, SULT1C3, SULT1C1,        | 0           | 1 | 0.00 | 0.00 |
| 2q#27524_27543 | 2 | 108954034-109265545 | 311512  | EDAR                                                 | 0           | 1 | 0.00 | 0.00 |
| 2q#27544_27584 | 2 | 109292289-109757764 | 465476  | AK000026, AK074131, SEPT10, C2orf26                  | 0           | 1 | 0.00 | 0.00 |
| 2q#27585_27707 | 2 | 109784570-112443406 | 2658837 | 040607, BC041362, BC022268, ACOXL, FLJ44006, BC      | 0           | 1 | 0.00 | 0.00 |
| 2q#27708_27823 | 2 | 112449471-113458868 | 1009398 | 131416, ZC3H6, BX649154, TTL, POLR1B, CHCHD5, S      | 0           | 1 | 0.00 | 0.00 |
| 2q#27824_27877 | 2 | 113462226-114036955 | 574730  | 1F6, IL1F8, IL1F5, IL1F10, BC068441, IL1RN, PSD4, AK | 0           | 1 | 0.00 | 0.00 |
| 2q#28162_28288 | 2 | 118560130-120227218 | 1667089 | L2, STEAP3, LOC130355, DBI, TMEM37, SCTR, MGC3       | 0           | 1 | 0.00 | 0.00 |
| 2q#28384_28396 | 2 | 121340276-121449220 | 108945  | GLI2                                                 | 0           | 1 | 0.00 | 0.00 |
| 2q#28404_28431 | 2 | 121603036-121889432 | 286397  | BC020554, TFCEP2L1, CLASP1                           | 0           | 1 | 0.00 | 0.00 |
| 2q#28432_28501 | 2 | 121895897-123163951 | 1268055 | CLASP1, AK098264, MKI67IP, TSN                       | 0           | 1 | 0.00 | 0.00 |
| 2q#28502_28573 | 2 | 123202383-124771359 | 1568977 | AK092193, CNTNAP5                                    | 0           | 1 | 0.00 | 0.00 |
| 2q#28574_28609 | 2 | 124779169-125109554 | 330386  | CNTNAP5                                              | 0           | 1 | 0.00 | 0.00 |
| 2q#28610_28646 | 2 | 125118497-125522129 | 403633  | CNTNAP5                                              | 0           | 1 | 0.00 | 0.00 |
| 2q#28683_28717 | 2 | 126676236-127512297 | 836062  | GYPC                                                 | 0           | 1 | 0.00 | 0.00 |
| 2q#28718_28723 | 2 | 127522206-127573302 | 51097   | BIN1                                                 | 0           | 1 | 0.00 | 0.00 |
| 2q#28724_28736 | 2 | 127579660-127722102 | 142443  | BIN1, FLJ16008, AK131790                             | 0           | 1 | 0.00 | 0.00 |

|                |   |                     |         |                                                   |   |   |      |      |
|----------------|---|---------------------|---------|---------------------------------------------------|---|---|------|------|
| 2q#28755_28758 | 2 | 127885324-127901608 | 16285   | AF370412, PROC                                    | 0 | 1 | 0.00 | 0.00 |
| 2q#28759_28801 | 2 | 127914565-128224856 | 310292  | , AK023543, AK000145, CR627350, LIMS2, AF527766,  | 0 | 1 | 0.00 | 0.00 |
| 2q#28802_28844 | 2 | 128232955-128627610 | 394656  | DR33, AK095788, POLR2D, MGC4268, SAP130, UGCG     | 0 | 1 | 0.00 | 0.00 |
| 2q#28915_28916 | 2 | 130280811-130313127 | 32317   |                                                   | 0 | 1 | 0.00 | 0.00 |
| 2q#28917_28928 | 2 | 130333378-130476419 | 143042  | AK123402, AK123452                                | 0 | 1 | 0.00 | 0.00 |
| 2q#28932_28936 | 2 | 130626674-130659385 | 32712   | FLJ20297, AB037839, FLJ14346                      | 0 | 1 | 0.00 | 0.00 |
| 2q#29006_29025 | 2 | 131773542-132090113 | 316572  | PLEKHB2, BC018206, BC093080                       | 0 | 1 | 0.00 | 0.00 |
| 2q#29026_29028 | 2 | 132100259-132111416 | 11158   | BC093080                                          | 0 | 1 | 0.00 | 0.00 |
| 2q#29038_29042 | 2 | 132270153-132327663 | 57511   | BX648270, C2orf27                                 | 0 | 1 | 0.00 | 0.00 |
| 2q#29043_29046 | 2 | 132341117-132428821 | 87705   | C2orf27                                           | 0 | 1 | 0.00 | 0.00 |
| 2q#29047_29054 | 2 | 132445101-132794211 | 349111  | BC045801                                          | 0 | 1 | 0.00 | 0.00 |
| 2q#29055_29068 | 2 | 132845876-132981239 | 135364  | BC045801, AK094599, AK096920                      | 0 | 1 | 0.00 | 0.00 |
| 2q#29136_29242 | 2 | 133684154-135149377 | 1465224 | LJ34870, BX647087, MGAT5, AL122044, DKFZP566N03   | 0 | 1 | 0.00 | 0.00 |
| 2q#29313_29344 | 2 | 135799098-136095789 | 296692  | ZRANB3                                            | 0 | 1 | 0.00 | 0.00 |
| 2q#29345_29355 | 2 | 136101201-136161581 | 60381   | ZRANB3, R3HDM1                                    | 0 | 1 | 0.00 | 0.00 |
| 2q#29375_29391 | 2 | 136301486-136437743 | 136258  | R3HDM1, UBXD2, LCT, MCM6                          | 0 | 1 | 0.00 | 0.00 |
| 2q#29392_29397 | 2 | 136444132-136474660 | 30529   | MCM6                                              | 0 | 1 | 0.00 | 0.00 |
| 2q#29398_29437 | 2 | 136487177-137214959 | 727783  | DARS, CXCR4                                       | 0 | 1 | 0.00 | 0.00 |
| 2q#29438_29452 | 2 | 137231250-137550837 | 319588  |                                                   | 0 | 1 | 0.00 | 0.00 |
| 2q#29453_29625 | 2 | 137565108-140267411 | 2702304 | 051466, BC039470, HNMT, CR626194, LOC339745, NXI  | 0 | 1 | 0.00 | 0.00 |
| 2q#29640_29690 | 2 | 140487966-141116334 | 628369  | LRP1B                                             | 0 | 1 | 0.00 | 0.00 |
| 2q#29691_29778 | 2 | 141122421-141947823 | 825403  | LRP1B                                             | 0 | 1 | 0.00 | 0.00 |
| 2q#30379_30585 | 2 | 151594970-154364399 | 2769430 | FB, AK054652, ARL5A, CACNB4, STAM2, FMNL2, AF15   | 0 | 1 | 0.00 | 0.00 |
| 2q#30586_30666 | 2 | 154394706-155448968 | 1054263 | AK131195, GALNT13, U39196, KCNJ3                  | 0 | 1 | 0.00 | 0.00 |
| 2q#30667_30687 | 2 | 155455240-155806826 | 351587  | KCNJ3                                             | 0 | 1 | 0.00 | 0.00 |
| 2q#31906_31937 | 2 | 170743145-171044664 | 301520  | ZNF650, MYO3B                                     | 0 | 1 | 0.00 | 0.00 |
| 2q#32295_32331 | 2 | 174942721-175324794 | 382074  | AL833646, CIR, SCR3, GPR155, BC046497, WASPIP     | 0 | 1 | 0.00 | 0.00 |
| 2q#32332_32336 | 2 | 175334893-175374068 | 39176   | BC046497                                          | 0 | 1 | 0.00 | 0.00 |
| 2q#32337_32382 | 2 | 175382244-175764818 | 382575  | BC046497, CHRNA1, CHN1, ATF2                      | 0 | 1 | 0.00 | 0.00 |
| 2q#37828_37829 | 2 | 241072363-241079320 | 6958    |                                                   | 0 | 1 | 0.00 | 0.00 |
| 2q#37831_37837 | 2 | 241099902-241125781 | 25880   | GPC1                                              | 0 | 1 | 0.00 | 0.00 |
| 2q#37838_37840 | 2 | 241130001-241141835 | 11835   | ANKMY1                                            | 0 | 1 | 0.00 | 0.00 |
| 2q#37841_37842 | 2 | 241156391-241163758 | 7368    | ANKMY1                                            | 0 | 1 | 0.00 | 0.00 |
| 2q#37843_37869 | 2 | 241166558-241348148 | 181591  | LOC285193, RNPEPL1, AK024254, CAPN10, AK17278     | 0 | 1 | 0.00 | 0.00 |
| 3p#39783_39827 | 3 | 20101881-21203216   | 1101336 | PCAF, SGOL1                                       | 0 | 1 | 0.00 | 0.00 |
| 3p#40618_40671 | 3 | 32430933-32936307   | 505375  | MTM7, CMTM6, AF479261, DYNC1LI1, CNOT10, TRIM7    | 0 | 1 | 0.00 | 0.00 |
| 3p#40672_40675 | 3 | 32954843-32981009   | 26167   | CCR4                                              | 0 | 1 | 0.00 | 0.00 |
| 3p#45439_45454 | 3 | 89387114-89516116   | 129003  | EPHA3                                             | 0 | 1 | 0.00 | 0.00 |
| 4p#54091_54111 | 4 | 1230468-1403422     | 172955  | BP1, MGC21675, AK125775, MAEA, KIAA1530, FLJ344   | 0 | 1 | 0.00 | 0.00 |
| 4p#54119_54123 | 4 | 1529615-1556907     | 27293   |                                                   | 0 | 1 | 0.00 | 0.00 |
| 4p#54124_54135 | 4 | 1567773-1655387     | 87615   | FAM53A                                            | 0 | 1 | 0.00 | 0.00 |
| 4p#54136_54139 | 4 | 1661893-1682508     | 20616   | SLBP                                              | 0 | 1 | 0.00 | 0.00 |
| 4q#61868_61923 | 4 | 109860657-110358635 | 497979  | AK094992, RPL34, DC2, AGXT2L1, COL25A1            | 0 | 1 | 0.00 | 0.00 |
| 4q#61924_61964 | 4 | 110376760-110812451 | 435692  | COL25A1, FLJ45231, AK058136, BC009800, SEC24B     | 0 | 1 | 0.00 | 0.00 |
| 4q#61965_62006 | 4 | 110818585-111149639 | 331055  | 20647, CASP6, PLA2G12A, CFI, BC020718, NOLA1, RFI | 0 | 1 | 0.00 | 0.00 |
| 4q#62007_62033 | 4 | 111156147-111369193 | 213047  | EGF, AK074813, ELOVL6                             | 0 | 1 | 0.00 | 0.00 |
| 4q#62034_62055 | 4 | 111378748-111663897 | 285150  | ELOVL6                                            | 0 | 1 | 0.00 | 0.00 |
| 4q#62056_62061 | 4 | 111680921-111763782 | 82862   | ENPEP                                             | 0 | 1 | 0.00 | 0.00 |
| 4q#62479_62512 | 4 | 119034974-119542532 | 507559  | NDST3                                             | 0 | 1 | 0.00 | 0.00 |
| 4q#62513_62522 | 4 | 119555946-119652928 | 96983   | PRSS12                                            | 0 | 1 | 0.00 | 0.00 |
| 4q#62524_62531 | 4 | 119714411-119812637 | 98227   | BC014590                                          | 0 | 1 | 0.00 | 0.00 |
| 4q#62532_62547 | 4 | 119819380-120020444 | 201065  | BC014590, AK024248, BC035733, KIAA1627, SEC24D    | 0 | 1 | 0.00 | 0.00 |
| 4q#62548_62651 | 4 | 120025727-121169169 | 1143443 | MYO22, AK098126, CR749490, USP53, LOC401152, D8   | 0 | 1 | 0.00 | 0.00 |
| 4q#62915_62953 | 4 | 124490030-125084029 | 594000  | SPATA5, SPRY1, AL833449, BC033378                 | 0 | 1 | 0.00 | 0.00 |
| 4q#63059_63067 | 4 | 127407113-127713604 | 306492  |                                                   | 0 | 1 | 0.00 | 0.00 |





|                   |    |                   |         |                                                    |     |   |      |      |
|-------------------|----|-------------------|---------|----------------------------------------------------|-----|---|------|------|
| 19p#206469_206474 | 19 | 433550-462072     | 28523   | AK024373, MADCAM1, C19orf20                        | 0   | 1 | 0.00 | 0.00 |
| 19p#206475_206477 | 19 | 467070-478735     | 11666   | C19orf20, AK024373                                 | 0   | 1 | 0.00 | 0.00 |
| 19p#206478_206483 | 19 | 483997-521867     | 37871   | CDC34, GZMM, AK024373                              | 0   | 1 | 0.00 | 0.00 |
| 19p#206484_206487 | 19 | 528487-540485     | 11999   | BSG, AK024373                                      | 0   | 1 | 0.00 | 0.00 |
| 19p#206490_206497 | 19 | 557030-602087     | 45058   | HCN2, POLRMT, AK024373, FLJ45684, RNF126           | 0   | 1 | 0.00 | 0.00 |
| 19p#207163_207173 | 19 | 5868021-5977237   | 109217  | RANBP3, RFX2                                       | 0   | 1 | 0.00 | 0.00 |
| 19p#207341_207343 | 19 | 7543595-7566356   | 22762   |                                                    | 0   | 1 | 0.00 | 0.00 |
| 19p#207344_207398 | 19 | 7573393-7909047   | 335655  | M, MCEMP1, BC042161, FCER2, CD209, CLEC4M, EVI5    | 0   | 1 | 0.00 | 0.00 |
| 19p#207468_207470 | 19 | 8544288-8561858   | 17571   | MYO1F, ADAMTS10                                    | 0   | 1 | 0.00 | 0.00 |
| 19p#207494_207509 | 19 | 8852549-9047156   | 194608  | MUC16                                              | 0   | 1 | 0.00 | 0.00 |
| 19p#207540_207550 | 19 | 9300842-9390626   | 89785   | ZNF559, BC034489, ZNF177, ZNF266                   | 0   | 1 | 0.00 | 0.00 |
| 19p#208076_208098 | 19 | 13720694-13838319 | 117626  | MGC10471, MGC3207, HSPC023, ZSWIM4                 | 0   | 1 | 0.00 | 0.00 |
| 19p#208151_208159 | 19 | 14368581-14439852 | 71272   | CD97, DDX39, PKN1                                  | 0   | 1 | 0.00 | 0.00 |
| 19q#209680_209703 | 19 | 40716218-40882175 | 165958  | S, TMEM147, ATP4A, AB020648, MGC10433, COX6B1,     | 0   | 1 | 0.00 | 0.00 |
| 19q#210534_210535 | 19 | 48433091-48449604 | 16514   | M38046, PSG9                                       | Inf | 1 | 0.02 | 0.00 |
| 19q#211142_211218 | 19 | 53482172-53955975 | 473804  | , PSCD2, AF318380, AB067470, SULT2B1, FAM83E, CA   | 0   | 1 | 0.00 | 0.00 |
| 19q#211219_211256 | 19 | 53964540-54194732 | 230193  | PLEKHA4, PPP1R15A, TULP2, NUCB1, DHDH, BAX, F7     | 0   | 1 | 0.00 | 0.00 |
| 19q#211444_211470 | 19 | 56633583-55903765 | 270183  | 703, LOC284361, AK090493, AK127628, JOSD2, BC0324  | 0   | 1 | 0.00 | 0.00 |
| 20p#214725_214726 | 20 | 25839919-25866104 | 26186   |                                                    | 0   | 1 | 0.00 | 0.00 |
| 20p#214727_214734 | 20 | 25885935-26156081 | 270147  | BC052952, AK097660, BC036544                       | 0   | 1 | 0.00 | 0.00 |
| 21q#217905_217918 | 21 | 13717139-14294382 | 577244  | ANKRD21, C21orf81                                  | 0   | 1 | 0.00 | 0.00 |
| 21q#217927_217939 | 21 | 14399547-14506082 | 106536  | BC070147, LIP1                                     | 0   | 1 | 0.00 | 0.00 |
| 21q#218579_218591 | 21 | 22628532-22913246 | 284715  |                                                    | 0   | 1 | 0.00 | 0.00 |
| 21q#218592_218606 | 21 | 22930704-23359263 | 428560  | AY063451                                           | 0   | 1 | 0.00 | 0.00 |
| 21q#218607_218621 | 21 | 23378746-23701610 | 322865  |                                                    | 0   | 1 | 0.00 | 0.00 |
| 21q#218622_218626 | 21 | 23707330-23787091 | 79762   |                                                    | 0   | 1 | 0.00 | 0.00 |
| 21q#218627_218638 | 21 | 23820049-24149500 | 329452  |                                                    | 0   | 1 | 0.00 | 0.00 |
| 21q#219371_219520 | 21 | 32051018-33388111 | 1337094 | C21orf63, AK001794, TCP10L, C21orf59, SYNJ1, BC038 | 0   | 1 | 0.00 | 0.00 |
| 21q#219521_219547 | 21 | 33411320-33650762 | 239443  | BC021745, IFNAR2, IL10RB, IFNAR1                   | 0   | 1 | 0.00 | 0.00 |
| 21q#219548_219591 | 21 | 33658674-33872268 | 213595  | X537378, TMEM50B, AF462153, C21orf55, GART, SON    | 0   | 1 | 0.00 | 0.00 |

**Supplementary table 3. Distribution of Luminal A and B tumors according to 8p chromosomal region amplification and histoclinical parameters.**

| Parameters            | n        | nonAmp_8p | Amp_8p    | p-value      | odds ratio           |
|-----------------------|----------|-----------|-----------|--------------|----------------------|
|                       | 100      | 82        | 18        |              |                      |
| Age                   | 100      | 54(29-85) | 58(24-80) | 0,767        |                      |
| Histological type*    | 87       |           |           | 0,719        |                      |
|                       |          | 15(21%)   | 2(14%)    |              |                      |
|                       | Other    |           |           |              |                      |
|                       | IDC      | 51(71%)   | 12(80%)   |              |                      |
|                       | ILC      | 6(8%)     | 1(7%)     |              |                      |
| Tumor size            | 99       |           |           | 0,605        |                      |
|                       | pT1      | 20(25%)   | 3(17%)    |              |                      |
|                       | pT2      | 41(51%)   | 12(67%)   |              |                      |
|                       | pT3      | 20(25%)   | 3(17%)    |              |                      |
| Lymph node metastasis | 100      |           |           | 0,172        |                      |
|                       | negative | 28(34%)   | 3(17%)    |              |                      |
|                       | positive | 54(66%)   | 15(83%)   |              |                      |
| SBR Grade             | 96       |           |           | <b>0,025</b> | 2,68<br>(0.82-8.83)  |
|                       | I-II     | 57(73%)   | 9(50%)    |              |                      |
|                       | III      | 21(27%)   | 9(50%)    |              |                      |
| ERBB2                 | 81       |           |           | 1,000        |                      |
|                       | negative | 63(95%)   | 15(100%)  |              |                      |
|                       | positive | 3(5%)     | 0(0%)     |              |                      |
| ER                    | 100      |           |           | 0,294        |                      |
|                       | negative | 4(5%)     | 2(11%)    |              |                      |
|                       | positive | 78(95%)   | 16(89%)   |              |                      |
| PR                    | 100      |           |           | 0,028        |                      |
|                       | negative | 15(18%)   | 8(44%)    |              |                      |
|                       | positive | 67(82%)   | 10(56%)   |              |                      |
| p53                   | 72       |           |           | 0,103        |                      |
|                       | negative | 52(88%)   | 9(69%)    |              |                      |
|                       | positive | 7(12%)    | 4(31%)    |              |                      |
| Ki67                  | 52       |           |           | <b>0,043</b> | 4,11<br>(0.75-23.09) |
|                       | negative | 34(87%)   | 8(62%)    |              |                      |
|                       | positive | 5(13%)    | 5(38%)    |              |                      |
| Molecular subtypes    | 100      |           |           | <b>0,001</b> | 6,98<br>(1.95-31.93) |
|                       | LuA      | 55(67%)   | 4(22%)    |              |                      |
|                       | LuB      | 27(33%)   | 14(78%)   |              |                      |

\* IDC, Invasive Ductal Carcinoma ; ILC, Invasive Lobular Carcinoma

**Supplementary Table 4 : Description of the breast cancer data sets**

| Reference                                    | Institution * | N° of arrays | Source of data                     | Technological platform   | N° of features |
|----------------------------------------------|---------------|--------------|------------------------------------|--------------------------|----------------|
| Ivshina et al., CR 2006[1]                   | GIS, Uppsala  | 289          | NCBI GEO db, GSE4922               | Affymetrix U133 A+B      | 2x22K          |
| Pawitan et al., BCR 2005[2]                  | KI            | 159          | NCBI GEO db, GSE1456               | Affymetrix U133 A+B      | 2x22K          |
| Weigelt et al., CR 2005 [3]                  | NIKI          | 169          | NCBI GEO db, GSE2741 (UNC GEO db)  | Agilent                  | 35K            |
| Hu et al., BMC Genomics 2006                 | NIKI          | 162          | NCBI GEO db, GSE1992 (UNC GEO db)  | Agilent                  | 35K            |
| Oh et al., JCO 2006 [4]                      | NIKI          | 161          | NCBI GEO db, GSE2740 (UNC GEO db)  | Agilent                  | 35K            |
| Perreard et al., BCR 2006 [5]                | NIKI          | 168          | NCBI GEO db, GSE2607 (UNC GEO db)  | Agilent                  | 35K            |
| Mullins et al., Clinical Chemistry 2007 [6]  | NIKI          | 158          | NCBI GEO db, GSE6130 (UNC GEO db)  | Agilent                  | 35K            |
| Herschkowitz et al., Genome Biology 2007 [7] | NIKI          | 232          | NCBI GEO db, GSE3165 (UNC GEO db)  | Agilent                  | 35K            |
| Hoadley et al., BMC Genomics 2007 [8]        | NIKI          | 248          | NCBI GEO db, GSE6128 (UNC GEO db)  | Agilent                  | 35K            |
| Parker et al., JCO 2009 [9]                  | NIKI          | 227          | NCBI GEO db, GSE10886 (UNC GEO db) | Agilent                  | 35K            |
| IPC serie [10]                               | IPC           | 266          | ----                               | Affymetrix U133 Plus 2.0 | 54K            |

\* Institutions: Nederlands Kanker Instituut (NKI), Karolinska Institute (KI), IPC (Institut Paoli-Calmettes)



1. Ivshina AV, George J, Senko O, Mow B, Putti TC, et al. (2006) Genetic reclassification of histologic grade delineates new clinical subtypes of breast cancer. *Cancer Res* 66: 10292-10301.
2. Pawitan Y, Bjohle J, Amler L, Borg AL, Eghazi S, et al. (2005) Gene expression profiling spares early breast cancer patients from adjuvant therapy: derived and validated in two population-based cohorts. *Breast Cancer Res* 7: R953-964.
3. Weigelt B, Hu Z, He X, Livasy C, Carey LA, et al. (2005) Molecular portraits and 70-gene prognosis signature are preserved throughout the metastatic process of breast cancer. *Cancer Res* 65: 9155-9158.
4. Oh JL, Dryden MJ, Woodward WA, Yu TK, Tereffe W, et al. (2006) Locoregional control of clinically diagnosed multifocal or multicentric breast cancer after neoadjuvant chemotherapy and locoregional therapy. *J Clin Oncol* 24: 4971-4975.
5. Perreard L, Fan C, Quackenbush JF, Mullins M, Gauthier NP, et al. (2006) Classification and risk stratification of invasive breast carcinomas using a real-time quantitative RT-PCR assay. *Breast Cancer Res* 8: R23.
6. Mullins M, Perreard L, Quackenbush JF, Gauthier N, Bayer S, et al. (2007) Agreement in breast cancer classification between microarray and quantitative reverse transcription PCR from fresh-frozen and formalin-fixed, paraffin-embedded tissues. *Clin Chem* 53: 1273-1279.
7. Herschkowitz JI, Simin K, Weigman VJ, Mikaelian I, Usary J, et al. (2007) Identification of conserved gene expression features between murine mammary carcinoma models and human breast tumors. *Genome Biol* 8: R76.
8. Hoadley KA, Weigman VJ, Fan C, Sawyer LR, He X, et al. (2007) EGFR associated expression profiles vary with breast tumor subtype. *BMC Genomics* 8: 258.
9. Parker JS, Mullins M, Cheang MC, Leung S, Voduc D, et al. (2009) Supervised risk predictor of breast cancer based on intrinsic subtypes. *J Clin Oncol* 27: 1160-1167.
10. Finetti P, Cervera N, Charafe-Jauffret E, Chabannon C, Charpin C, et al. (2008) Sixteen-kinase gene expression identifies luminal breast cancers with poor prognosis. *Cancer Res* 68: 767-776.

Supplementary Table 5. Distribution of breast cancer molecular subtypes for each public dataset.

|                       | SSP-Molecular subtypes |           |           |           |           |
|-----------------------|------------------------|-----------|-----------|-----------|-----------|
|                       | Basal                  | ERBB2     | LuminalA  | LuminalB  | Normal    |
| <b>IPC series</b>     | 75 (28%)               | 24 (9%)   | 89 (33%)  | 49 (18%)  | 29 (11%)  |
| <b>Ivshina et al.</b> | 42 (15%)               | 40 (14%)  | 109 (39%) | 42 (14%)  | 56 (20%)  |
| <b>Pawitan et al.</b> | 30 (19%)               | 18 (11%)  | 46 (29%)  | 27 (17%)  | 38 (24%)  |
| <b>UNC.GEO db</b>     | 122 (27%)              | 53 (12%)  | 158 (34%) | 42 (9%)   | 84 (18%)  |
| <b>Total</b>          | 269 (23%)              | 135 (12%) | 402 (34%) | 159 (14%) | 207 (18%) |

Supplementary Table 6: Correlation between ZNF703 expression and histoclinical parameters

| Parameters            | n=       | ZNF703   |          | p-value | odds ratio          |
|-----------------------|----------|----------|----------|---------|---------------------|
|                       |          | High     | Low      |         |                     |
| Age                   | 561      | 245      | 316      | 0,41    | 1,2<br>(0.79-1.82)  |
|                       | 457      | 68(32%)  | 70(28%)  |         |                     |
|                       |          | 143(68%) | 176(72%) |         |                     |
| Histological type*    | 199      |          |          | 0,43    |                     |
|                       | IDC      | 79(75%)  | 79(84%)  |         |                     |
|                       | ILC      | 10(10%)  | 4(4%)    |         |                     |
|                       | other    | 16(16%)  | 11(12%)  |         |                     |
| Tumor size            | 445      |          |          | 0,23    |                     |
|                       | pT1      | 61(30%)  | 93(39%)  |         |                     |
|                       | pT2      | 106(52%) | 105(44%) |         |                     |
|                       | pT3      | 31(15%)  | 33(14%)  |         |                     |
|                       |          | 7(3%)    | 9(4%)    |         |                     |
| Lymph node metastasis | 443      |          |          | 0,44    | 1,17<br>(0.79-1.74) |
|                       | negative | 95(46%)  | 99(42%)  |         |                     |

|           |           |     |           |           |                     |
|-----------|-----------|-----|-----------|-----------|---------------------|
| SBR grade | positive  | 532 | 112(54%)  | 137(58%)  | 0,20                |
|           | I         |     | 48(20%)   | 62(21%)   |                     |
|           | II        |     | 103(43%)  | 147(50%)  |                     |
|           | III       |     | 86(36%)   | 86(29%)   |                     |
| ERBB2     | negative  | 128 | 61(94%)   | 58(92%)   | 1,31<br>(0.27-6.95) |
|           | positive  |     | 4(6%)     | 5(8%)     |                     |
| ER        | negative  | 446 | 28(13%)   | 35(15%)   | 0,9<br>(0.51-1.59)  |
|           | positive  |     | 180(87%)  | 203(85%)  |                     |
| PR        | negative  | 267 | 22(16%)   | 15(11%)   | 1,52<br>(0.71-3.31) |
|           | positive  |     | 113(84%)  | 117(89%)  |                     |
| p53       | negative  | 108 | 43(81%)   | 42(76%)   | 1,33<br>(0.48-3.79) |
|           | positive  |     | 10(19%)   | 13(24%)   |                     |
| Ki67      | negative  | 107 | 22(42%)   | 23(42%)   | 1,02<br>(0.44-2.36) |
|           | positive  |     | 30(58%)   | 32(58%)   |                     |
| SSP       | Luminal A | 561 | 152(62%)  | 250(79%)  | 0,43<br>(0.29-0.64) |
|           | Luminal B |     | 93(38%)   | 66(21%)   |                     |
| DFS (5y)  |           | 510 | 228 (68%) | 282 (78%) | <b>0,0136</b>       |

\* IDC, Invasive Ductal Carcinoma ; ILC, Invasive Lobular Carcinoma

**Supplementary Table 7. Detailed information on proteins identified by nanoLC-MSMS (ion Trap)**

| Identified proteins                     | SwissProt Accession numbers | MSMS identified unique peptides | Position sequence in protein | Mascot ion score |
|-----------------------------------------|-----------------------------|---------------------------------|------------------------------|------------------|
| Zinc finger protein 703                 | ZN703_HUMAN                 | LNSVAAAANGLGAEK                 | 110-124                      | 89               |
|                                         |                             | SAPGAASAAAALK                   | 129-141                      | 64               |
|                                         |                             | DQEPKPSPEPAAVSR                 | 246-260                      | 41               |
|                                         |                             | FATSEELLSHLR                    | 471-482                      | 68               |
| 60 kDa heat shock protein               | CH60_HUMAN                  | TVIIQSWGSPK                     | 61 - 72                      | 70               |
|                                         |                             | LVQDVANNTNEEAGDGTATVLR          | 97 - 121                     | 66               |
|                                         |                             | QSKPVTTPPEIAQVATISANGDK         | 158 - 180                    | 48               |
|                                         |                             | EIGNIISDAMK                     | 181 - 191                    | 44               |
|                                         |                             | TLNDELEIIEGMK                   | 206 - 218                    | 99               |
|                                         |                             | CEFQDAYVLLSEK                   | 237 - 249                    | 87               |
|                                         |                             | ISSIQSIVPALEIANAHR              | 251 - 268                    | 83               |
|                                         |                             | VGLQVVAVK                       | 293 - 301                    | 77               |
|                                         |                             | IQEIIQLDVTTSEYEK                | 371 - 387                    | 32               |
|                                         |                             | LSDGVAVLK                       | 397 - 405                    | 64               |
|                                         |                             | VGGTSDVEVNEK                    | 406 - 417                    | 86               |
|                                         |                             | AAVEEGIVLGGGCALLR               | 430 - 446                    | 106              |
|                                         |                             | CIPALDSLTPANEDQK                | 447 - 462                    | 66               |
|                                         |                             | IGIEIHK                         | 463 - 469                    | 60               |
| NAGVEGSLIVEK                            | 482 - 493                   | 79                              |                              |                  |
| WD repeat-containing protein 68 (DCAF7) | WDR68_HUMAN                 | LALGSFVEEYNNK                   | 34 - 46                      | 89               |
|                                         |                             | NTFDHPYPTTK                     | 63 - 73                      | 40               |
|                                         |                             | LECLLNNNK                       | 107 - 115                    | 36               |
|                                         |                             | EVYDIAFSR                       | 176 - 184                    | 63               |
|                                         |                             | DMFASVGADGSVR                   | 190 - 202                    | 51               |
| Prohibitin-2                            | PHB2_HUMAN                  | LLLGAAGAVAYGVR                  | 25 - 37                      | 57               |
|                                         |                             | FNASQLITQR                      | 148 - 157                    | 48               |
|                                         |                             | AQVSLLR                         | 158 - 165                    | 35               |



## Supplementary table 8. Multi Experiment Matrix results for ZNF703 query

| Score    | Gene name | probeset id | Gene description                                                                                                   |
|----------|-----------|-------------|--------------------------------------------------------------------------------------------------------------------|
| #QUERY   | ZNF703    | 222760_AT   | Zinc finger, protein 703 [Source:UniProtKB/Swiss-Prot;Acc:Q9H7S9]                                                  |
| 1.15e-61 | NCOR2     | 207760_s_at | nuclear receptor co-repressor 2 [Source:HGNC Symbol;Acc:7673]                                                      |
| 9.63e-60 | PWWP2B    | 227999_at   | PWWP domain containing 2B [Source:HGNC Symbol;Acc:25150]                                                           |
| 7.53e-59 | TP53111   | 203421_at   | p53-induced protein [Source:RefSeq peptide;Acc:NP_006025]                                                          |
| 2.29e-56 | PLXNB2    | 208890_s_at | plexin B2 [Source:HGNC Symbol;Acc:9104]                                                                            |
| 2.38e-56 | RXRA      | 202449_s_at | retinoid X receptor, alpha [Source:HGNC Symbol;Acc:10477]                                                          |
| 7.54e-55 | FAM129B   | 223019_at   | family with sequence similarity 129, member B [Source:HGNC Symbol;Acc:25282]                                       |
| 5.78e-54 | IER5L     | 226559_at   | immediate early response 5-like [Source:HGNC Symbol;Acc:23679]                                                     |
| 7.57e-54 | N/A       | 226377_at   | N/A                                                                                                                |
| 1.63e-52 | SOX4      | 201418_s_at | SRY (sex determining region Y)-box 4 [Source:HGNC Symbol;Acc:1200]                                                 |
| 1.63e-51 | CUEDC1    | 227667_at   | CUE domain-containing protein 1 [Source:UniProtKB/Swiss-Prot;Acc:Q9NWM3]                                           |
| 8.84e-51 | ZDHHC1    | 228637_at   | zinc finger, DHHC-type containing 1 [Source:HGNC Symbol;Acc:17916]                                                 |
| 1.04e-50 | SORBS3    | 209253_at   | sorbin and SH3 domain containing 3 [Source:HGNC Symbol;Acc:30907]                                                  |
| 1.4e-50  | PIP5K1C   | 212518_at   | phosphatidylinositol-4-phosphate 5-kinase, type I, gamma [Source:HGNC Symbol;Acc:8996]                             |
| 7.66e-50 | CTDSP1    | 217844_at   | CTD (carboxy-terminal domain, RNA polymerase II, polypeptide A) small phosphatase 1 [Source:HGNC Symbol;Acc:21614] |
| 2.66e-49 | ZCCHC24   | 212419_at   | zinc finger, CCHC domain containing 24 [Source:HGNC Symbol;Acc:26911]                                              |
| 9.31e-49 | SH3BP4    | 222258_s_at | SH3-domain binding protein 4 [Source:HGNC Symbol;Acc:10826]                                                        |
| 1.16e-47 | CUEDC1    | 219468_s_at | CUE domain containing 1 [Source:HGNC Symbol;Acc:31350]                                                             |
| 3.41e-47 | ZBTB7A    | 219186_at   | zinc finger and BTB domain containing 7A [Source:HGNC Symbol;Acc:18078]                                            |
| 3.99e-47 | HOMER3    | 204647_at   | homer homolog 3 (Drosophila) [Source:HGNC Symbol;Acc:17514]                                                        |

Supplementary Table 9: Genes modulated by ZNF703 overexpression in MCF7 cell lines.

| PID         | Gene symbol | Gene name                                                    | Locus         | GeneID:MAJ    | MCF7.GFP_090226.01.CEL | MCF7.GFP.C9_090319.01.CEL | MCF7.GFP-ZNF703_090226.02.CEL | MCF7.GFP-ZNF703.C8_090319.02.CEL | p-Value     | Fold Change GFP-ZNF703 Vs GFP |
|-------------|-------------|--------------------------------------------------------------|---------------|---------------|------------------------|---------------------------|-------------------------------|----------------------------------|-------------|-------------------------------|
| 211959_at   | IGFBP5      | insulin-like growth factor binding protein 5                 | 2q33-q36      | GeneID:3488   | 4.209                  | 7.919                     | 11.789                        | 11.081                           | 4.46752E-07 | 41.38                         |
| 209988_s_at | ASCL1       | achaete-scute complex homolog 1 (Drosophila)                 | 12q23.2       | GeneID:429    | 3.016                  | 3.648                     | 10.97                         | 6.168                            | 3.26209E-06 | 37.71                         |
| 216623_x_at | TOX3        | TOX high mobility group box family member 3                  | 16q12.1       | GeneID:27324  | 2.848                  | 3.313                     | 9.434                         | 6.812                            | 4.02801E-09 | 32.96                         |
| 206165_s_at | CLCA2       | CLCA family member 2, chloride channel regulator             | 1p31-p22      | GeneID:9635   | 3.39                   | 5.065                     | 9.592                         | 8.404                            | 1.97621E-09 | 27.29                         |
| 226612_at   | FLJ25076    | similar to CG4502-PA                                         | 5p15.31       | GeneID:134111 | 4.641                  | 5.209                     | 9.641                         | 8.443                            | 2.49241E-07 | 17.35                         |
| 217771_at   | GOLM1       | golgi membrane protein 1                                     | 9q21.33       | GeneID:51280  | 4.54                   | 5.376                     | 9.946                         | 8.106                            | 1.10303E-06 | 16.77                         |
| 201505_at   | LAMB1       | laminin, beta 1                                              | 7q22          | GeneID:3912   | 3.358                  | 3.44                      | 8.359                         | 5.547                            | 2.21971E-06 | 11.75                         |
| 1552365_at  | SCIN        | scinderin                                                    | 7p21.3        | GeneID:85477  | 3.147                  | 3.279                     | 8.279                         | 5.157                            | 8.14783E-06 | 11.35                         |
| 204612_at   | PKIA        | protein kinase (cAMP-dependent, catalytic) inhibitor alpha   | 8q21.12       | GeneID:5569   | 4.794                  | 4.194                     | 9.114                         | 6.756                            | 3.01259E-06 | 10.86                         |
| 213564_x_at | LDHB        | lactate dehydrogenase B                                      | 12p12.2-p12.1 | GeneID:3945   | 3.355                  | 3.433                     | 8.779                         | 4.875                            | 7.68319E-05 | 10.80                         |
| 205304_s_at | KCNJ8       | potassium inwardly-rectifying channel, subfamily J, member 8 | 12p11.23      | GeneID:3764   | 4.891                  | 3.842                     | 8.974                         | 6.613                            | 3.08257E-06 | 10.76                         |
| 235976_at   | SLITRK6     | SLIT and NTRK-like family, member 6                          | 13q31.1       | GeneID:84189  | 4.019                  | 4.616                     | 8.04                          | 6.914                            | 1.32896E-07 | 8.94                          |
| 203372_s_at | Socs2       | suppressor of cytokine signaling 2                           | 12q           | GeneID:8835   | 3.223                  | 3.689                     | 7.187                         | 6.04                             | 3.21882E-08 | 8.92                          |
| 226279_at   | PRSS23      | protease, serine, 23                                         | 11q14.1       | GeneID:11098  | 4.322                  | 4.72                      | 8.296                         | 7.028                            | 9.69909E-07 | 8.82                          |
| 217889_s_at | CYBRD1      | cytochrome b reductase 1                                     | 2q31.1        | GeneID:79901  | 3.952                  | 4.944                     | 7.889                         | 7.02                             | 6.67443E-07 | 8.04                          |
| 201753_s_at | ADD3        | adducin 3 (gamma)                                            | 10q24.2-q24.3 | GeneID:120    | 4.443                  | 5.09                      | 9.806                         | 5.511                            | 0.002466901 | 7.42                          |
| 220625_s_at | ELF5        | E74-like factor 5 (ets domain transcription factor)          | 11p13-p12     | GeneID:2001   | 4.291                  | 6.817                     | 8.943                         | 7.939                            | 0.000318818 | 7.40                          |
| 209813_x_at | TRGC2       | T cell receptor gamma constant 2                             | 7p14          | GeneID:6967   | 6.366                  | 5.15                      | 10.066                        | 7.19                             | 0.000734339 | 7.31                          |
| 202626_s_at | LYN         | v-yes-1 Yamaguchi sarcoma viral related oncogene homolog     | 8q13          | GeneID:4067   | 4.193                  | 4.08                      | 8.399                         | 5.529                            | 7.32433E-05 | 7.10                          |
| 201540_at   | FHL1        | four and a half LIM domains 1                                | Xq26          | GeneID:2273   | 3.496                  | 4.023                     | 7.554                         | 5.341                            | 6.46899E-05 | 6.44                          |
| 203324_s_at | CAV2        | caveolin 2                                                   | 7q31.1        | GeneID:858    | 3.936                  | 3.766                     | 7.145                         | 5.889                            | 2.61328E-06 | 6.35                          |

|              |         |                                                                                                         |              |               |       |       |        |        |             |      |
|--------------|---------|---------------------------------------------------------------------------------------------------------|--------------|---------------|-------|-------|--------|--------|-------------|------|
| 203637_s_at  | MID1    | midline 1 (Opitz/BBB syndrome)                                                                          | Xp22         | GeneID:4281   | 3.748 | 3.355 | 8.274  | 4.097  | 0.003784942 | 6.21 |
| 205569_at    | LAMP3   | lysosomal-associated membrane protein 3                                                                 | 3q26.3-q27   | GeneID:27074  | 4.746 | 5.94  | 8.36   | 7.538  | 0.000652264 | 6.09 |
| 226875_at    | DOCK11  | dedicator of cytokinesis 11                                                                             | Xq24         | GeneID:139818 | 4.895 | 4.367 | 7.812  | 6.64   | 3.19238E-05 | 6.04 |
| 201215_at    | PLS3    | plastin 3 (T isoform)                                                                                   | Xq23         | GeneID:5358   | 2.939 | 2.95  | 8.021  | 3.041  | 0.033894651 | 6.01 |
| 222921_s_at  | HEY2    | hairy/enhancer-of-split related with YRPW motif 2                                                       | 6q21         | GeneID:23493  | 4.331 | 4.642 | 8.096  | 6      | 6.0341E-05  | 5.90 |
| 213664_at    | SLC1A1  | solute carrier family 1 (neuronal/epithelial high affinity glutamate transporter, system Xag), member 1 | 9p24         | GeneID:6505   | 3.557 | 4.196 | 5.773  | 7.094  | 1.35557E-05 | 5.88 |
| 225645_at    | EHF     | ets homologous factor                                                                                   | 11p12        | GeneID:26298  | 3.363 | 5.913 | 8.385  | 5.958  | 0.002284825 | 5.79 |
| 203708_at    | PDE4B   | phosphodiesterase 4B, cAMP-specific (phosphodiesterase E4 dunce homolog, Drosophila)                    | 1p31         | GeneID:5142   | 3.313 | 3.885 | 7.109  | 5.079  | 0.000541506 | 5.64 |
| 237395_at    | CYP4Z1  | cytochrome P450, family 4, subfamily Z, polypeptide 1                                                   | 1p33         | GeneID:199974 | 2.864 | 3.2   | 7.806  | 3.194  | 0.036286952 | 5.53 |
| 220253_s_at  | LRP12   | low density lipoprotein-related protein 12                                                              | 8q22.2-q23.1 | GeneID:29967  | 3.524 | 4.197 | 6.729  | 5.874  | 7.97536E-05 | 5.43 |
| 204872_at    | TLE4    | transducin-like enhancer of split 4 (E(sp1) homolog, Drosophila)                                        | 9q21.31      | GeneID:7091   | 3.823 | 3.935 | 6.836  | 5.777  | 5.61761E-05 | 5.38 |
| 217967_s_at  | FAM129A | family with sequence similarity 129, member A                                                           | 1q25         | GeneID:116496 | 6.402 | 8.251 | 9.818  | 9.592  | 2.65944E-06 | 5.20 |
| 212097_at    | CAV1    | caveolin 1, caveolae protein, 22kDa                                                                     | 7q31.1       | GeneID:857    | 3.116 | 2.778 | 6.967  | 3.629  | 0.028238795 | 5.10 |
| 227174_at    | WDR72   | WD repeat domain 72                                                                                     | 15q21.3      | GeneID:256764 | 3.66  | 5.292 | 7.823  | 5.822  | 0.00042777  | 5.09 |
| 221558_s_at  | LEF1    | lymphoid enhancer-binding factor 1                                                                      | 4q23-q25     | GeneID:51176  | 3.915 | 4.012 | 7.544  | 5.067  | 0.000831685 | 5.07 |
| 210095_s_at  | IGFBP3  | insulin-like growth factor binding protein 3                                                            | 7p13-p12     | GeneID:3486   | 4.17  | 5.047 | 7.2    | 6.661  | 7.39501E-05 | 5.00 |
| 225897_at    | MARCKS  | myristoylated alanine-rich protein kinase C substrate                                                   | 6q22.2       | GeneID:4082   | 6.56  | 5.766 | 9.552  | 7.312  | 0.000417374 | 4.82 |
| 213385_at    | CHN2    | chimerin (chimaerin) 2                                                                                  | 7p15.3       | GeneID:1124   | 4.022 | 6.031 | 7.329  | 7.204  | 0.001381717 | 4.72 |
| 225612_s_at  | B3GNT5  | UDP-GlcNAc:betaGal beta-1,3-N-acetylglucosaminyltransferase 5                                           | 3q28         | GeneID:84002  | 5.696 | 7.781 | 9.296  | 8.652  | 2.47084E-05 | 4.71 |
| 1555340_x_at | RAP1A   | RAP1A, member of RAS oncogene family                                                                    | 1p13.3       | GeneID:5906   | 6.639 | 9.146 | 8.298  | 11.9   | 0.006331496 | 4.62 |
| 225987_at    | STEAP4  | STEAP family member 4                                                                                   | 7q21.12      | GeneID:79689  | 4.733 | 4.186 | 8.268  | 5.021  | 0.00307879  | 4.55 |
| 209590_at    | BMP7    | bone morphogenetic protein 7                                                                            | 20q13        | GeneID:655    | 9.03  | 10.06 | 11.716 | 11.722 | 1.81653E-08 | 4.51 |

|             |         |                                                                                                  |               |               |       |       |       |       |             |      |
|-------------|---------|--------------------------------------------------------------------------------------------------|---------------|---------------|-------|-------|-------|-------|-------------|------|
| 202345_s_at | FABP5   | fatty acid binding protein 5 (psoriasis-associated)                                              | 8q21.13       | GeneID:2171   | 3.776 | 5.973 | 7.987 | 6.109 | 0.003828884 | 4.51 |
| 213236_at   | SASH1   | SAM and SH3 domain containing 1                                                                  | 6q24.3        | GeneID:23328  | 6.377 | 6.138 | 8.821 | 7.986 | 5.54456E-06 | 4.43 |
| 218885_s_at | GALNT12 | UDP-N-acetyl-alpha-D-galactosamine:polypeptide N-acetylgalactosaminyltransferase 12 (GalNAc-T12) | 9q22.33       | GeneID:79695  | 5.039 | 4.033 | 8.11  | 5.233 | 0.003735222 | 4.39 |
| 208986_at   | TCF12   | transcription factor 12                                                                          | 15q21         | GeneID:6938   | 3.415 | 7.684 | 7.653 | 7.692 | 0.019599851 | 4.36 |
| 205083_at   | AOX1    | aldehyde oxidase 1                                                                               | 2q33          | GeneID:316    | 4.58  | 4.887 | 6.932 | 6.778 | 0.000215804 | 4.35 |
| 215125_s_at | UGT1A10 | UDP glucuronosyltransferase 1 family, polypeptide A10                                            | 2q37          | GeneID:54575  | 4.008 | 4.343 | 8.685 | 3.834 | 0.034831355 | 4.24 |
| 212192_at   | KCTD12  | potassium channel tetramerisation domain containing 12                                           | 13q22.3       | GeneID:115207 | 4.103 | 6.021 | 7.434 | 6.851 | 0.00275157  | 4.23 |
| 208473_s_at | GP2     | glycoprotein 2 (zymogen granule membrane)                                                        | 16p12         | GeneID:2813   | 4.163 | 4.595 | 6.18  | 6.672 | 0.000158843 | 4.13 |
| 231120_x_at | PKIB    | protein kinase (cAMP-dependent, catalytic) inhibitor beta                                        | 6q22.31       | GeneID:5570   | 4.042 | 3.569 | 6.776 | 4.916 | 0.018773343 | 4.11 |
| 228038_at   | SOX2    | SRY (sex determining region Y)-box 2                                                             | 3q26.3-q27    | GeneID:6657   | 6.294 | 9.198 | 10.08 | 9.347 | 0.001182563 | 3.91 |
| 204424_s_at | LMO3    | LIM domain only 3 (rhombotin-like 2)                                                             | 12p12.3       | GeneID:55885  | 5.972 | 5.594 | 7.591 | 7.862 | 0.000702554 | 3.85 |
| 1553602_at  | MUC1L   | mucin-like 1                                                                                     | 12q           | GeneID:118430 | 6.944 | 5.408 | 8.935 | 7.231 | 0.001468657 | 3.75 |
| 229160_at   | MUM1L1  | melanoma associated antigen (mutated) 1-like 1                                                   | Xq22.3        | GeneID:139221 | 4.495 | 3.574 | 6.926 | 4.931 | 0.016761537 | 3.72 |
| 205347_s_at | TMSL8   | thymosin-like 8                                                                                  | Xq21.33-q22.3 | GeneID:11013  | 5.796 | 5.712 | 8.135 | 7.11  | 0.002251086 | 3.65 |
| 205110_s_at | FGF13   | fibroblast growth factor 13                                                                      | Xq26.3        | GeneID:2258   | 5.573 | 5.82  | 7.736 | 7.376 | 0.001837133 | 3.63 |
| 204688_at   | SGCE    | sarcoglycan, epsilon                                                                             | 7q21-q22      | GeneID:8910   | 3.47  | 4.732 | 4.082 | 7.837 | 0.044442871 | 3.63 |
| 218692_at   | GOLSYN  | Golgi-localized protein                                                                          | 8q23.2        | GeneID:55638  | 5.469 | 6.467 | 8.355 | 7.288 | 0.002059708 | 3.61 |
| 220414_at   | CALML5  | calmodulin-like 5                                                                                | 10p15.1       | GeneID:51806  | 4.224 | 5.105 | 7.657 | 5.164 | 0.015517029 | 3.35 |
| 225798_at   | JAZF1   | JAZF zinc finger 1                                                                               | 7p15.2-p15.1  | GeneID:221895 | 4.463 | 7.327 | 7.475 | 7.771 | 0.016866115 | 3.31 |
| 223092_at   | ANKH    | ankylosis, progressive homolog (mouse)                                                           | 5p15.1        | GeneID:56172  | 5.905 | 7.405 | 8.709 | 8.044 | 6.34963E-05 | 3.30 |
| 219659_at   | ATP8A2  | ATPase, aminophospholipid transporter-like, class 1, type 8A, member 2                           | 13q12         | GeneID:51761  | 4.541 | 4.82  | 7.59  | 5.195 | 0.014550989 | 3.28 |
| 203180_at   | ALDH1A3 | aldehyde dehydrogenase 1 family, member A3                                                       | 15q26.3       | GeneID:220    | 4.716 | 4.741 | 7.735 | 5.144 | 0.018233899 | 3.27 |

|             |           |                                                                                         |                |               |       |       |        |        |             |      |
|-------------|-----------|-----------------------------------------------------------------------------------------|----------------|---------------|-------|-------|--------|--------|-------------|------|
| 221530_s_at | BHLHB3    | basic helix-loop-helix domain containing, class B, 3                                    | 12p11.23-p12.1 | GeneID:79365  | 7.265 | 7.997 | 8.916  | 9.767  | 8.66133E-06 | 3.27 |
| 209684_at   | RIN2      | Ras and Rab interactor 2                                                                | 20p11.22       | GeneID:54453  | 4.682 | 4.32  | 6.829  | 5.588  | 0.006801811 | 3.27 |
| 238681_at   | GDPD1     | glycerophosphodiester phosphodiesterase domain containing 1                             | 17q22          | GeneID:284161 | 4.239 | 7.391 | 6.908  | 8.133  | 0.028173812 | 3.26 |
| 206023_at   | NMU       | neuromedin U                                                                            | 4q12           | GeneID:10874  | 7.682 | 7.759 | 9.695  | 9.145  | 3.13485E-07 | 3.25 |
| 221824_s_at | MARCH8    | membrane-associated ring finger (C3HC4) 8                                               | 10q11.21       | GeneID:220972 | 4.2   | 5.873 | 7.499  | 5.967  | 0.014191813 | 3.24 |
| 209792_s_at | KLK10     | kallikrein-related peptidase 10                                                         | 19q13.3-q13.4  | GeneID:5655   | 4.534 | 4.713 | 7.193  | 5.423  | 0.012655822 | 3.21 |
| 204623_at   | TFF3      | trefoil factor 3 (intestinal)                                                           | 21q22.3        | GeneID:7033   | 9.238 | 9.816 | 11.019 | 11.379 | 8.24186E-08 | 3.19 |
| 213059_at   | CREB3L1   | cAMP responsive element binding protein 3-like 1                                        | 11p11.2        | GeneID:90993  | 5.429 | 5.85  | 8.038  | 6.564  | 0.008961066 | 3.16 |
| 218820_at   | C14orf132 | chromosome 14 open reading frame 132                                                    | 14q32.2        | GeneID:56967  | 6.781 | 8.807 | 9.588  | 9.309  | 0.000224584 | 3.15 |
| 203917_at   | CXADR     | coxsackie virus and adenovirus receptor                                                 | 21q21.1        | GeneID:1525   | 8.29  | 8.673 | 10.72  | 9.55   | 5.7832E-06  | 3.15 |
| 209230_s_at | NUPR1     | nuclear protein 1                                                                       | 16p11.2        | GeneID:26471  | 6.148 | 7.603 | 8.394  | 8.642  | 8.70831E-05 | 3.12 |
| 208606_s_at | WNT4      | wingless-type MMTV integration site family, member 4                                    | 1p36.23-p35.1  | GeneID:54361  | 4.976 | 5.403 | 7.342  | 6.319  | 0.010082731 | 3.12 |
| 204532_x_at | UGT1A4    | UDP glucuronosyltransferase 1 family, polypeptide A4                                    | 2q37           | GeneID:54657  | 5.577 | 5.395 | 8.547  | 5.695  | 0.031127338 | 3.11 |
| 232116_at   | GRHL3     | grainyhead-like 3 (Drosophila)                                                          | 1p36.11        | GeneID:57822  | 5.721 | 4.92  | 7.578  | 6.312  | 0.022305377 | 3.08 |
| 1554079_at  | GALNTL4   | UDP-N-acetyl-alpha-D-galactosamine:polypeptide N-acetylgalactosaminyltransferase-like 4 | 11p15.3        | GeneID:374378 | 4.883 | 5.094 | 7.058  | 6.164  | 0.007233079 | 3.08 |
| 204491_at   | PDE4D     | phosphodiesterase 4D, cAMP-specific (phosphodiesterase E3 dunce homolog, Drosophila)    | 5q12           | GeneID:5144   | 5.811 | 5.533 | 7.5    | 7.009  | 0.006054849 | 2.99 |
| 211919_s_at | CXCR4     | chemokine (C-X-C motif) receptor 4                                                      | 2q21           | GeneID:7852   | 7.762 | 9.817 | 9.93   | 10.812 | 0.001059867 | 2.99 |
| 215177_s_at | ITGA6     | integrin, alpha 6                                                                       | 2q31.1         | GeneID:3655   | 4.701 | 5.257 | 6.914  | 6.201  | 0.008246878 | 2.99 |
| 214030_at   | CRYBG3    | beta-gamma crystallin domain containing 3                                               | 3q11.2         | GeneID:131544 | 4.664 | 4.853 | 6.965  | 5.645  | 0.019038988 | 2.92 |
| 227703_s_at | SYTL4     | synaptotagmin-like 4                                                                    | Xq21.33        | GeneID:94121  | 6.028 | 6.158 | 8.282  | 6.908  | 0.007063578 | 2.83 |
| 219737_s_at | PCDH9     | protocadherin 9                                                                         | 13q14.3-q21.1  | GeneID:5101   | 6.693 | 6.677 | 8.665  | 7.695  | 8.88445E-05 | 2.82 |
| 205870_at   | BDKRB2    | bradykinin receptor B2                                                                  | 14q32.1-q32.2  | GeneID:624    | 5.169 | 5.743 | 7.459  | 6.416  | 0.021356215 | 2.79 |
| 212464_s_at | FN1       | fibronectin 1                                                                           | 2q34           | GeneID:2335   | 5.588 | 7.759 | 7.359  | 8.938  | 0.008339693 | 2.78 |
| 204897_at   | PTGER4    | prostaglandin E receptor 4 (subtype EP4)                                                | 5p13.1         | GeneID:5734   | 5.682 | 7.303 | 7.381  | 8.547  | 0.002015333 | 2.77 |

|             |          |                                                             |                         |               |       |       |        |       |             |      |
|-------------|----------|-------------------------------------------------------------|-------------------------|---------------|-------|-------|--------|-------|-------------|------|
| 226817_at   | DSC2     | desmocollin 2                                               | 18q12.1                 | GeneID:1824   | 4.971 | 5.833 | 6.667  | 7.078 | 0.0217683   | 2.77 |
| 227816_at   | NTN1     | netrin 1                                                    | 17p13-p12               | GeneID:9423   | 5.761 | 6.785 | 7.814  | 7.649 | 0.000671193 | 2.75 |
| 219389_at   | SUSD4    | sushi domain containing 4                                   | 1q41                    | GeneID:55061  | 6.388 | 6.757 | 8.459  | 7.6   | 5.19031E-05 | 2.75 |
| 209147_s_at | PPAP2A   | phosphatidic acid phosphatase type 2A                       | 5q11                    | GeneID:8611   | 6.645 | 7.091 | 9.019  | 7.612 | 0.000618911 | 2.73 |
| 222242_s_at | KLK5     | kallikrein-related peptidase 5                              | 19q13.3-q13.4           | GeneID:25818  | 4.952 | 4.982 | 7.674  | 5.15  | 0.049352175 | 2.72 |
| 227480_at   | SUSD2    | sushi domain containing 2                                   | 22q11-q12               | GeneID:56241  | 7.912 | 6.522 | 8.989  | 8.333 | 0.000254485 | 2.72 |
| 219863_at   | HERC5    | hect domain and RLD 5                                       | 4q22.1                  | GeneID:51191  | 5.28  | 5.669 | 7.029  | 6.796 | 0.016370139 | 2.71 |
| 208370_s_at | RCAN1    | regulator of calcineurin 1                                  | 21q22.1-q22.2 21q22.12  | GeneID:1827   | 7.846 | 7.972 | 10.098 | 8.594 | 0.000244694 | 2.71 |
| 203510_at   | MET      | met proto-oncogene (hepatocyte growth factor receptor)      | 7q31                    | GeneID:4233   | 6.145 | 5.245 | 7.437  | 6.769 | 0.018229157 | 2.65 |
| 228570_at   | BTBD11   | BTB (POZ) domain containing 11                              | 12q23.3                 | GeneID:121551 | 5.637 | 6.236 | 7.294  | 7.395 | 0.010770389 | 2.65 |
| 203414_at   | MMD      | monocyte to macrophage differentiation-associated           | 17q                     | GeneID:23531  | 7.231 | 7.547 | 9.1    | 8.446 | 2.11974E-05 | 2.61 |
| 226065_at   | PRICKLE1 | prickle homolog 1 (Drosophila)                              | 12q12                   | GeneID:144165 | 4.985 | 6.245 | 7.622  | 6.374 | 0.037201447 | 2.61 |
| 201649_at   | UBE2L6   | ubiquitin-conjugating enzyme E2L 6                          | 11q12                   | GeneID:9246   | 6.809 | 8.536 | 9.011  | 9.087 | 0.000662903 | 2.60 |
| 205769_at   | SLC27A2  | solute carrier family 27 (fatty acid transporter), member 2 | 15q21.2                 | GeneID:11001  | 7.296 | 8.008 | 8.956  | 9.095 | 1.66074E-05 | 2.59 |
| 206698_at   | XK       | X-linked Kx blood group (McLeod syndrome)                   | Xp21.1                  | GeneID:7504   | 4.839 | 6.099 | 7.432  | 6.239 | 0.036299197 | 2.58 |
| 226844_at   | MOBKLB   | MOB1, Mps One Binder Kinase activator-like 2B (yeast)       | 9p21.2                  | GeneID:79817  | 4.753 | 5.608 | 6.986  | 6.101 | 0.031366534 | 2.57 |
| 206204_at   | GRB14    | growth factor receptor-bound protein 14                     | 2q22-q24                | GeneID:2888   | 7.506 | 8.049 | 9.92   | 8.355 | 0.000967898 | 2.57 |
| 220615_s_at | FAR2     | fatty acyl CoA reductase 2                                  | 12p11.22                | GeneID:55711  | 5.702 | 5.021 | 7.238  | 6.203 | 0.046422085 | 2.57 |
| 202720_at   | TES      | testis derived transcript (3 LIM domains)                   | 7q31.2                  | GeneID:26136  | 6.556 | 8.035 | 8.99   | 8.294 | 0.001059813 | 2.54 |
| 222450_at   | PMEPA1   | prostate transmembrane protein, androgen induced 1          | 20q13.3 20q13.31-q13.33 | GeneID:56937  | 5.631 | 7.122 | 7.618  | 7.827 | 0.003157106 | 2.54 |
| 212531_at   | LCN2     | lipocalin 2                                                 | 9q34                    | GeneID:3934   | 5.295 | 8.064 | 8.745  | 7.298 | 0.027545791 | 2.54 |
| 209822_s_at | VLDLR    | very low density lipoprotein receptor                       | 9p24                    | GeneID:7436   | 5.052 | 6.674 | 6.866  | 7.54  | 0.025403187 | 2.53 |
| 205603_s_at | DIAPH2   | diaphanous homolog 2 (Drosophila)                           | Xq21.33                 | GeneID:1730   | 4.963 | 5.073 | 6.833  | 5.864 | 0.033789035 | 2.51 |

|              |          |                                                                                          |               |               |        |        |        |        |             |      |
|--------------|----------|------------------------------------------------------------------------------------------|---------------|---------------|--------|--------|--------|--------|-------------|------|
| 1555935_s_at | HUNK     | hormonally up-regulated Neu-associated kinase                                            | 21q22.1       | GeneID:30811  | 4.762  | 5.029  | 7.026  | 5.423  | 0.048072151 | 2.51 |
| 204040_at    | RNF144A  | ring finger protein 144A                                                                 | 2p25.2-p25.1  | GeneID:9781   | 5.14   | 5.262  | 7.02   | 6.005  | 0.047499753 | 2.48 |
| 225667_s_at  | FAM84A   | family with sequence similarity 84, member A                                             | 2p24.3        | GeneID:151354 | 9.103  | 8.927  | 10.684 | 9.903  | 2.33258E-05 | 2.43 |
| 221854_at    | PKP1     | plakophilin 1 (ectodermal dysplasia/skin fragility syndrome)                             | 1q32          | GeneID:5317   | 5.556  | 5.679  | 6.701  | 7.066  | 0.030495823 | 2.40 |
| 212154_at    | SDC2     | syndecan 2                                                                               | 8q22-q23      | GeneID:6383   | 6.422  | 5.693  | 7.312  | 7.325  | 0.01193805  | 2.40 |
| 219789_at    | NPR3     | natriuretic peptide receptor C/guanylate cyclase C (atrionatriuretic peptide receptor C) | 5p14-p13      | GeneID:4883   | 6.063  | 5.709  | 7.471  | 6.805  | 0.024983984 | 2.38 |
| 207030_s_at  | CSRP2    | cysteine and glycine-rich protein 2                                                      | 12q21.1       | GeneID:1466   | 6.826  | 7.52   | 9.084  | 7.764  | 0.000841294 | 2.38 |
| 205206_at    | KAL1     | Kallmann syndrome 1 sequence                                                             | Xp22.32       | GeneID:3730   | 6.88   | 6.462  | 7.8    | 8.034  | 8.09439E-05 | 2.37 |
| 202052_s_at  | RAI14    | retinoic acid induced 14                                                                 | 5p13.3-p13.2  | GeneID:26064  | 6.105  | 5.825  | 8.014  | 6.397  | 0.029515906 | 2.36 |
| 226925_at    | ACPL2    | acid phosphatase-like 2                                                                  | 3q23          | GeneID:92370  | 6.357  | 7.882  | 8.289  | 8.424  | 0.001277764 | 2.36 |
| 202481_at    | DHRS3    | dehydrogenase/reductase (SDR family) member 3                                            | 1p36.1        | GeneID:9249   | 6.384  | 6.521  | 8.099  | 7.257  | 0.000431189 | 2.34 |
| 230087_at    | PRIMA1   | proline rich membrane anchor 1                                                           | 14q32.13      | GeneID:145270 | 5.146  | 5.824  | 7.112  | 6.27   | 0.047829804 | 2.31 |
| 204602_at    | DKK1     | dickkopf homolog 1 (Xenopus laevis)                                                      | 10q11.2       | GeneID:22943  | 10     | 10.375 | 11.572 | 11.208 | 4.14822E-06 | 2.30 |
| 204378_at    | BCAS1    | breast carcinoma amplified sequence 1                                                    | 20q13.2       | GeneID:8537   | 6.168  | 5.935  | 7.723  | 6.782  | 0.018290909 | 2.30 |
| 201426_s_at  | VIM      | vimentin                                                                                 | 10p13         | GeneID:7431   | 6.246  | 6.801  | 8.035  | 7.391  | 0.000993006 | 2.28 |
| 225390_s_at  | KLF13    | Kruppel-like factor 13                                                                   | 15q12         | GeneID:51621  | 5.271  | 6.391  | 7.408  | 6.627  | 0.035241038 | 2.28 |
| 227188_at    | C21orf63 | chromosome 21 open reading frame 63                                                      | 21q22.11      | GeneID:59271  | 6.272  | 6.784  | 7.793  | 7.635  | 0.000517009 | 2.28 |
| 225647_s_at  | CTSC     | cathepsin C                                                                              | 11q14.1-q14.3 | GeneID:1075   | 6.205  | 6.366  | 7.998  | 6.941  | 0.004350675 | 2.27 |
| 219703_at    | MNS1     | meiosis-specific nuclear structural 1                                                    | 15q21.3       | GeneID:55329  | 6.091  | 7.254  | 8.095  | 7.607  | 0.0027479   | 2.26 |
| 215785_s_at  | CYFIP2   | cytoplasmic FMR1 interacting protein 2                                                   | 5q33.3        | GeneID:26999  | 8.623  | 8.272  | 9.644  | 9.554  | 6.38755E-06 | 2.22 |
| 218729_at    | LXN      | latexin                                                                                  | 3q25.32       | GeneID:56925  | 10.084 | 11.428 | 11.146 | 12.667 | 0.004646091 | 2.22 |
| 226335_at    | RPS6KA3  | ribosomal protein S6 kinase, 90kDa, polypeptide 3                                        | Xp22.2-p22.1  | GeneID:6197   | 7.393  | 7.728  | 8.87   | 8.516  | 5.3261E-05  | 2.19 |
| 221584_s_at  | KCNMA1   | potassium large conductance calcium-activated channel, subfamily M, alpha member 1       | 10q22.3       | GeneID:3778   | 6.749  | 7.961  | 8.164  | 8.804  | 0.002257739 | 2.19 |

|             |          |                                                              |                  |               |       |        |        |        |             |      |
|-------------|----------|--------------------------------------------------------------|------------------|---------------|-------|--------|--------|--------|-------------|------|
| 201063_at   | RCN1     | reticulocalbin 1, EF-hand calcium binding domain             | 11p13            | GeneID:5954   | 7.436 | 8.456  | 9.347  | 8.794  | 0.000960313 | 2.18 |
| 212909_at   | LYPD1    | LY6/PLAUR domain containing 1                                | 2q21.2           | GeneID:116372 | 5.45  | 5.549  | 6.455  | 6.791  | 0.041568123 | 2.18 |
| 205549_at   | PCP4     | Purkinje cell protein 4                                      | 21q22.2          | GeneID:5121   | 5.942 | 6.444  | 8.074  | 6.544  | 0.023307837 | 2.17 |
| 209785_s_at | PLA2G4C  | phospholipase A2, group IVC (cytosolic, calcium-independent) | 19q13.3          | GeneID:8605   | 6.331 | 6.645  | 7.131  | 8.074  | 0.002894926 | 2.17 |
| 1552766_at  | HS6ST2   | heparan sulfate 6-O-sulfotransferase 2                       | Xq26.2           | GeneID:90161  | 6.449 | 5.924  | 7.85   | 6.749  | 0.015642484 | 2.16 |
| 213135_at   | TIAM1    | T-cell lymphoma invasion and metastasis 1                    | 21q22.1 21q22.11 | GeneID:7074   | 7.431 | 7.778  | 8.802  | 8.624  | 0.000237626 | 2.16 |
| 225450_at   | AMOTL1   | angiominin like 1                                            | 11q14.3          | GeneID:154810 | 6.723 | 7.281  | 8.271  | 7.946  | 0.000598874 | 2.15 |
| 205364_at   | ACOX2    | acyl-Coenzyme A oxidase 2, branched chain                    | 3p14.3           | GeneID:8309   | 7.956 | 9.386  | 9.55   | 10.004 | 0.001973971 | 2.15 |
| 228256_s_at | EPB41L4A | erythrocyte membrane protein band 4.1 like 4A                | 5q22.2           | GeneID:64097  | 6.076 | 7.044  | 7.605  | 7.713  | 0.001139804 | 2.14 |
| 219806_s_at | C11orf75 | chromosome 11 open reading frame 75                          | 11q13.3-q23.3    | GeneID:56935  | 6.948 | 7.86   | 8.511  | 8.495  | 0.000427264 | 2.14 |
| 230323_s_at | TMEM45B  | transmembrane protein 45B                                    | 11q24.3          | GeneID:120224 | 7.422 | 7.3    | 8.821  | 8.098  | 0.000130871 | 2.14 |
| 225368_at   | HIPK2    | homeodomain interacting protein kinase 2                     | 7q32-q34         | GeneID:28996  | 7.049 | 7.772  | 8.339  | 8.676  | 0.000256851 | 2.14 |
| 213540_at   | HSD17B8  | hydroxysteroid (17-beta) dehydrogenase 8                     | 6p21.3           | GeneID:7923   | 7.172 | 6.126  | 7.895  | 7.584  | 0.001119851 | 2.13 |
| 223220_s_at | PARP9    | poly (ADP-ribose) polymerase family, member 9                | 3q13-q21         | GeneID:83666  | 6.637 | 7.594  | 8.412  | 7.991  | 0.001939111 | 2.12 |
| 202887_s_at | DDIT4    | DNA-damage-inducible transcript 4                            | 10pter-q26.12    | GeneID:54541  | 8.746 | 10.162 | 10.043 | 11.033 | 0.003520499 | 2.12 |
| 217853_at   | TNS3     | tensin 3                                                     | 7p12.3           | GeneID:64759  | 7.317 | 7.238  | 8.722  | 7.975  | 0.000250908 | 2.10 |
| 219038_at   | MORC4    | MORC family CW-type zinc finger 4                            | Xq22.3           | GeneID:79710  | 7.907 | 7.973  | 9.223  | 8.773  | 5.0853E-05  | 2.08 |
| 224847_at   | CDK6     | cyclin-dependent kinase 6                                    | 7q21-q22         | GeneID:1021   | 6.664 | 7.167  | 8.208  | 7.727  | 0.000884049 | 2.07 |
| 218960_at   | TMPRSS4  | transmembrane protease, serine 4                             | 11q23.3          | GeneID:56649  | 6.039 | 7.311  | 7.697  | 7.741  | 0.005044076 | 2.06 |
| 222446_s_at | BACE2    | beta-site APP-cleaving enzyme 2                              | 21q22.3          | GeneID:25825  | 7.688 | 8.625  | 9.479  | 8.902  | 0.001226238 | 2.05 |
| 200878_at   | EPAS1    | endothelial PAS domain protein 1                             | 2p21-p16         | GeneID:2034   | 8.673 | 9.078  | 10.371 | 9.432  | 0.000677003 | 2.04 |
| 219522_at   | FJX1     | four jointed box 1 (Drosophila)                              | 11p13            | GeneID:24147  | 5.962 | 6.529  | 7.856  | 6.68   | 0.013800638 | 2.03 |
| 226961_at   | PRR15    | proline rich 15                                              | 7p15.1           | GeneID:222171 | 7.469 | 8.279  | 8.896  | 8.87   | 0.000607682 | 2.01 |
| 208920_at   | SRI      | sorcin                                                       | 7q21.1           | GeneID:6717   | 5.641 | 6.673  | 7.491  | 6.827  | 0.034454376 | 2.00 |
| 209747_at   | TGFB3    | transforming growth factor, beta 3                           | 14q24            | GeneID:7043   | 7.313 | 6.391  | 8.376  | 7.329  | 0.007422388 | 2.00 |



|             |           |                                                                                    |               |               |        |        |       |       |             |       |
|-------------|-----------|------------------------------------------------------------------------------------|---------------|---------------|--------|--------|-------|-------|-------------|-------|
| 205696_s_at | GFRA1     | GDNF family receptor alpha 1                                                       | 10q26         | GeneID:2674   | 8.823  | 8.603  | 7.538 | 7.869 | 0.000209607 | -2.01 |
| 202234_s_at | SLC16A1   | solute carrier family 16, member 1 (monocarboxylic acid transporter 1)             | 1p12          | GeneID:6566   | 7.255  | 7.695  | 6.099 | 6.818 | 0.011836889 | -2.02 |
| 231766_s_at | COL12A1   | collagen, type XII, alpha 1                                                        | 6q12-q13      | GeneID:1303   | 7.942  | 7.751  | 6.757 | 6.887 | 0.000886768 | -2.03 |
| 229390_at   | FAM26F    | family with sequence similarity 26, member F                                       | 6q22.1        | GeneID:441168 | 8.402  | 8.354  | 7.608 | 7.076 | 0.000369385 | -2.05 |
| 204385_at   | KYNU      | kynureninase (L-kynurenine hydrolase)                                              | 2q22.2        | GeneID:8942   | 10.092 | 10.708 | 8.933 | 9.712 | 0.000204165 | -2.11 |
| 232861_at   | PDP2      | pyruvate dehydrogenase phosphatase isoenzyme 2                                     | 16q22.1       | GeneID:57546  | 7.967  | 7.559  | 6.578 | 6.791 | 0.000359386 | -2.11 |
| 210613_s_at | SYNGR1    | synaptogyrin 1                                                                     | 22q13.1       | GeneID:9145   | 8.826  | 8.883  | 7.229 | 8.306 | 0.000951179 | -2.12 |
| 216048_s_at | RHOBTB3   | Rho-related BTB domain containing 3                                                | 5q15          | GeneID:22836  | 9.153  | 8.655  | 8.209 | 7.309 | 0.00042387  | -2.21 |
| 204595_s_at | STC1      | stanniocalcin 1                                                                    | 8p21-p11.2    | GeneID:6781   | 9.437  | 9.679  | 7.667 | 9.078 | 0.00097735  | -2.27 |
| 203463_s_at | EPN2      | epsin 2                                                                            | 17p11.2       | GeneID:22905  | 7.825  | 7.688  | 6     | 7.121 | 0.000953798 | -2.29 |
| 223218_s_at | NFKBIZ    | nuclear factor of kappa light polypeptide gene enhancer in B-cells inhibitor, zeta | 3p12-q12      | GeneID:64332  | 9.188  | 9.879  | 7.669 | 8.925 | 0.000712042 | -2.36 |
| 210367_s_at | PTGES     | prostaglandin E synthase                                                           | 9q34.3        | GeneID:9536   | 8.523  | 8.121  | 6.936 | 6.826 | 6.04162E-06 | -2.72 |
| 222379_at   | KCNE4     | potassium voltage-gated channel, Isk-related family, member 4                      | 2q36.3        | GeneID:23704  | 7.403  | 8.541  | 5.609 | 7.365 | 0.003360104 | -2.80 |
| 213258_at   | TFPI      | tissue factor pathway inhibitor (lipoprotein-associated coagulation inhibitor)     | 2q32          | GeneID:7035   | 10.078 | 9.192  | 8.367 | 7.933 | 1.65527E-05 | -2.80 |
| 225044_at   | NT5C3L    | 5'-nucleotidase, cytosolic III-like                                                | 17q21.2       | GeneID:115024 | 8.622  | 7.259  | 6.267 | 6.632 | 0.001204634 | -2.81 |
| 210139_s_at | PMP22     | peripheral myelin protein 22                                                       | 17p12-p11.2   | GeneID:5376   | 11.637 | 11.927 | 8.481 | 12.02 | 0.01721727  | -2.89 |
| 206632_s_at | APOBEC3B  | apolipoprotein B mRNA editing enzyme, catalytic polypeptide-like 3B                | 22q13.1-q13.2 | GeneID:9582   | 8.974  | 9.746  | 7.671 | 7.977 | 5.79497E-06 | -2.90 |
| 223614_at   | C8orf57   | chromosome 8 open reading frame 57                                                 | 8q21.3        | GeneID:84257  | 10.031 | 9.835  | 7.182 | 9.234 | 0.000277604 | -3.31 |
| 221667_s_at | HSPB8     | heat shock 22kDa protein 8                                                         | 12q24.23      | GeneID:26353  | 11.409 | 10.267 | 9.157 | 8.936 | 1.05348E-06 | -3.46 |
| 242660_at   | C10orf112 | chromosome 10 open reading frame 112                                               | 10p12.33      | GeneID:340895 | 8.929  | 8.942  | 6.921 | 7.138 | 2.54951E-07 | -3.75 |
| 1553180_at  | ADAMTS19  | ADAM metalloproteinase with thrombospondin type 1 motif, 19                        | 5q31          | GeneID:171019 | 5.63   | 6.644  | 3.964 | 4.1   | 0.030765204 | -4.30 |

|             |        |                                                 |             |               |       |       |       |       |             |       |
|-------------|--------|-------------------------------------------------|-------------|---------------|-------|-------|-------|-------|-------------|-------|
| 213110_s_at | COL4A5 | collagen, type IV, alpha 5                      | Xq22        | GeneID:1287   | 8.016 | 8.807 | 3.834 | 8.632 | 0.02136181  | -4.53 |
| 230960_at   | PUNC   | putative neuronal cell adhesion molecule        | 15q22.3-q23 | GeneID:9543   | 7.053 | 7.008 | 4.512 | 4.978 | 0.011963244 | -4.88 |
| 207012_at   | MMP16  | matrix metalloproteinase 16 (membrane-inserted) | 8q21        | GeneID:4325   | 8.097 | 7.332 | 4.968 | 5.772 | 0.010551402 | -5.08 |
| 228956_at   | UGT8   | UDP glycosyltransferase 8                       | 4q26        | GeneID:7368   | 6.903 | 6.858 | 5.779 | 3.192 | 0.015317508 | -5.26 |
| 233305_at   | NECAB1 | N-terminal EF-hand calcium binding protein 1    | 8q21.3      | GeneID:64168  | 6.383 | 8.561 | 2.826 | 7.252 | 0.043679126 | -5.40 |
| 210261_at   | KCNK2  | potassium channel, subfamily K, member 2        | 1q41        | GeneID:3776   | 7.569 | 6.343 | 4.958 | 4.032 | 0.007840396 | -5.51 |
| 225895_at   | SYNPO2 | synaptopodin 2                                  | 4q26        | GeneID:171024 | 7.274 | 7.904 | 4.505 | 5.737 | 0.008504598 | -5.53 |
| 202663_at   | WIPF1  | WAS/WASL interacting protein family, member 1   | 2q31.1      | GeneID:7456   | 7.611 | 8.033 | 4.178 | 5.423 | 0.002043182 | -8.12 |

**Supplementary Table 10. Enrichment analysis of ZNF703-induced genes in stem cell-related gene sets**

| Stem cell-related Gene sets         | number of genes | number of common upregulated gene | Odd ratio   | p-value         | number of common downregulated gene | Odd ratio   | p-value         |
|-------------------------------------|-----------------|-----------------------------------|-------------|-----------------|-------------------------------------|-------------|-----------------|
| BC.SPH_Dontu_2003_UP [1]            | 19              | 1                                 | 6,84        | 0,14            | 0                                   | ---         | 1,00            |
| BC.DIFF.CELL_Dontu_2003_UP          | 34              | 0                                 | ---         | 1,00            | 0                                   | ---         | 1,00            |
| BC.LIU.CLARKE_07_TUMOR_UP [2]       | 53              | 0                                 | ---         | 1,00            | 0                                   | ---         | 1,00            |
| BC.LIU.CLARKE_07_NL_UP              | 49              | 0                                 | ---         | 1,00            | 0                                   | ---         | 1,00            |
| S5.CD44.PROCR_SHIPITSIN_UP [3]      | 581             | 13                                | <b>3,12</b> | <b>7,66E-04</b> | 4                                   | <b>5,13</b> | <b>1,36E-02</b> |
| S5.CD24_SHIPITSIN_UP                | 837             | 3                                 | 0,42        | 0,16            | 2                                   | 1,49        | 0,65            |
| S6.CD44.PROCR_SHIPITSIN_UP          | 738             | 18                                | <b>3,62</b> | <b>2,02E-05</b> | 3                                   | 2,76        | 0,12            |
| S6.CD24_SHIPITSIN_UP                | 939             | 3                                 | 0,37        | ---             | 1                                   | 0,62        | ---             |
| MUR_S1.ESC.RHAMALOS.SANTOS_UP [4]   | 1113            | 12                                | 1,39        | 0,29            | 2                                   | 1,09        | 0,71            |
| MUR_S1.NSC.RHAMALOS.SANTOS_UP       | 1615            | 13                                | 0,99        | ---             | 1                                   | 0,33        | ---             |
| MUR_S1.HSC.RHAMALOS.SANTOS_UP       | 1172            | 11                                | 1,18        | 0,60            | 3                                   | 1,65        | 0,43            |
| MUR_S1.3SC.RHAMALOS.SANTOS_UP       | 176             | 3                                 | 2,16        | 0,17            | 0                                   | ---         | 1,00            |
| MUR_S1.DIFF.CELL.RHAMALOS.SANTOS_UP | 34              | 1                                 | 3,73        | 0,24            | 0                                   | ---         | 1,00            |
| ESC_EXP1_ASSOU_07_UP [5]            | 280             | 5                                 | 2,30        | 0,08            | 0                                   | ---         | 1,00            |
| ESC_EXP2_ASSOU_07_UP                | 23              | 0                                 | ---         | 1,00            | 0                                   | ---         | 1,00            |
| ESC_NANOG.TG_BOYER_05_UP [6]        | 762             | 15                                | <b>2,77</b> | <b>1,10E-03</b> | 2                                   | 1,65        | 0,37            |
| ESC_OCT4.TG_BOYER_05_UP             | 208             | 5                                 | <b>3,13</b> | <b>2,70E-02</b> | 1                                   | 3,01        | 0,30            |
| ESC_SOX2.TG_BOYER_05_UP             | 572             | 10                                | <b>2,33</b> | <b>2,54E-02</b> | 2                                   | 2,25        | 0,25            |
| ESC_NOS.TG_BOYER_05_UP              | 124             | 5                                 | <b>5,39</b> | <b>3,33E-03</b> | 1                                   | 5,11        | 0,19            |
| ESC_NOS.TFS_BEN.PORATH_08_UP [7]    | 26              | 1                                 | 4,93        | 0,19            | 0                                   | ---         | 1,00            |
| ESC_SUZ12.TG_LEE_06_DOWN [8]        | 273             | 14                                | <b>7,73</b> | <b>3,48E-08</b> | 1                                   | 2,28        | 0,37            |
| ESC_Eed.TG_LEE_06_DOWN              | 322             | 14                                | <b>6,46</b> | <b>2,69E-07</b> | 2                                   | 4,11        | 0,10            |
| ESC_H3K27.BOUND_LEE_06_DOWN         | 270             | 15                                | <b>8,53</b> | <b>3,57E-09</b> | 1                                   | 2,31        | 0,37            |
| ESC_PRC2.TG_LEE_06_DOWN             | 134             | 9                                 | <b>9,72</b> | <b>1,28E-06</b> | 0                                   | ---         | 1,00            |

|                                |     |   |      |      |   |     |      |
|--------------------------------|-----|---|------|------|---|-----|------|
| ESC_MYC.TG_FERNANDEZ_03_UP [9] | 171 | 0 | ---  | 0,65 | 0 | --- | 1,00 |
| ESC_MYC.TG_LI_03_UP [10]       | 684 | 1 | 0,17 | ---  | 0 | --- | 0,62 |

1. Dontu G, Abdallah WM, Foley JM, Jackson KW, Clarke MF, et al. (2003) In vitro propagation and transcriptional profiling of human mammary stem/progenitor cells. *Genes Dev* 17: 1253-1270.
2. Liu R, Wang X, Chen GY, Dalerba P, Gurney A, et al. (2007) The prognostic role of a gene signature from tumorigenic breast-cancer cells. *N Engl J Med* 356: 217-226.
3. Shipitsin M, Campbell LL, Argani P, Weremowicz S, Bloushtain-Qimron N, et al. (2007) Molecular definition of breast tumor heterogeneity. *Cancer Cell* 11: 259-273.
4. Ramalho-Santos M, Yoon S, Matsuzaki Y, Mulligan RC, Melton DA (2002) "Stemness": transcriptional profiling of embryonic and adult stem cells. *Science* 298: 597-600.
5. Assou S, Le Carrou T, Tondeur S, Strom S, Gabelle A, et al. (2007) A meta-analysis of human embryonic stem cells transcriptome integrated into a web-based expression atlas. *Stem Cells* 25: 961-973.
6. Boyer LA, Lee TI, Cole MF, Johnstone SE, Levine SS, et al. (2005) Core transcriptional regulatory circuitry in human embryonic stem cells. *Cell* 122: 947-956.
7. Ben-Porath I, Thomson MW, Carey VJ, Ge R, Bell GW, et al. (2008) An embryonic stem cell-like gene expression signature in poorly differentiated aggressive human tumors. *Nat Genet* 40: 499-507.
8. Lee TI, Jenner RG, Boyer LA, Guenther MG, Levine SS, et al. (2006) Control of developmental regulators by Polycomb in human embryonic stem cells. *Cell* 125: 301-313.
9. Fernandez PC, Frank SR, Wang L, Schroeder M, Liu S, et al. (2003) Genomic targets of the human c-Myc protein. *Genes Dev* 17: 1115-1129.
10. Li Y, Welm B, Podsypanina K, Huang S, Chamorro M, et al. (2003) Evidence that transgenes encoding components of the Wnt signaling pathway preferentially induce mammary cancers from progenitor cells. *Proc Natl Acad Sci U S A* 100: 15853-15858.

**Supplementary table 11. Gene set enrichment analysis comparing activated transcription factors between Luminal A and B tumors**

| GeneSet NAME          | NES       | NOM p-val  | FDR q-val  | related to ER | related to E2F1 |
|-----------------------|-----------|------------|------------|---------------|-----------------|
| V\$E2F_Q4_01          | 1.6080362 | 0.01340996 | 0.36145526 | 0             | 1               |
| V\$E2F_Q3_01          | 1.5612494 | 0.01367188 | 0.19358402 | 0             | 1               |
| V\$E2F1_Q4_01         | 1.5604259 | 0.01574803 | 0.14629477 | 0             | 1               |
| V\$E2F_Q3             | 1.5648698 | 0.01897533 | 0.27912444 | 0             | 1               |
| V\$E2F1_Q4            | 1.473431  | 0.02       | 0.13964714 | 0             | 1               |
| V\$NFY_Q6             | 1.4006773 | 0.03359684 | 0.11448564 | 0             | 0               |
| V\$SF1_Q6             | 1.4190475 | 0.03665988 | 0.11261111 | 1             | 0               |
| V\$E2F_Q1             | 1.50208   | 0.03703704 | 0.13072501 | 0             | 1               |
| V\$E2F_Q6             | 1.5372139 | 0.03929273 | 0.14768334 | 0             | 1               |
| V\$E2F_Q6_01          | 1.4904593 | 0.03977273 | 0.13112633 | 0             | 1               |
| V\$E2F_Q4             | 1.5286542 | 0.04271845 | 0.13492224 | 0             | 1               |
| SGCGSSAAA_V\$E2F1DP2_ | 1.5171028 | 0.04961832 | 0.12961467 | 0             | 1               |
| V\$E2F_Q2             | 1.447814  | 0.06704981 | 0.14472038 | 0             | 1               |
| V\$E2F1_Q6_01         | 1.4272875 | 0.06782946 | 0.12285861 | 0             | 1               |
| V\$E2F1DP1_01         | 1.4413226 | 0.06805293 | 0.13186021 | 0             | 1               |
| V\$E2F1DP2_01         | 1.4413226 | 0.06805293 | 0.1420033  | 0             | 1               |
| V\$E2F4DP2_01         | 1.4413226 | 0.06805293 | 0.12306953 | 0             | 0               |
| V\$E2F1_Q6            | 1.4632754 | 0.06923077 | 0.1383945  | 0             | 1               |
| V\$E2F4DP1_01         | 1.4008076 | 0.07307693 | 0.1195215  | 0             | 0               |
| V\$E2F1DP1RB_01       | 1.4192227 | 0.07421875 | 0.11837661 | 0             | 1               |
| TGACCTTG_V\$SF1_Q6    | 1.2990955 | 0.07566463 | 0.22923508 | 1             | 0               |
| V\$E2F_Q3             | 1.4286684 | 0.07854406 | 0.12915586 | 0             | 1               |
| V\$E2F1_Q3            | 1.4270972 | 0.08510638 | 0.11627398 | 0             | 1               |
| V\$NRSF_Q1            | 1.4171948 | 0.10239651 | 0.10884176 | 0             | 0               |
| V\$MYC_Q2             | 1.2735047 | 0.10365854 | 0.2635931  | 1             | 1               |
| V\$NFY_Q6_01          | 1.2384236 | 0.1125     | 0.32004306 | 0             | 0               |
| V\$NFY_Q1             | 1.2381413 | 0.12474849 | 0.3091623  | 0             | 0               |
| V\$MYCMAX_B           | 1.2019107 | 0.15492958 | 0.36516136 | 1             | 1               |
| V\$MYCMAX_Q1          | 1.1893412 | 0.15637065 | 0.35880795 | 1             | 1               |
| V\$GABP_B             | 1.3137958 | 0.15830116 | 0.21519631 | 0             | 0               |
| V\$AP2_Q3             | 1.1895708 | 0.16396761 | 0.36946452 | 0             | 0               |
| V\$USF_Q1             | 1.2157551 | 0.18093385 | 0.34662673 | 0             | 0               |
| V\$MYCMAX_Q3          | 1.1532755 | 0.20281124 | 0.4306717  | 1             | 1               |
| V\$PPARG_Q1           | 1.1968354 | 0.22469635 | 0.3646226  | 0             | 1               |
| V\$ALPHACP1_Q1        | 1.1055497 | 0.2370518  | 0.549157   | 0             | 0               |
| V\$AP1_Q1             | 1.0954514 | 0.28313252 | 0.54782003 | 1             | 0               |
| V\$MAX_Q1             | 1.1000707 | 0.2848723  | 0.5493617  | 0             | 0               |
| V\$ERR1_Q2            | 1.0818686 | 0.2862823  | 0.55666167 | 0             | 0               |
| V\$MYOD_Q6            | 1.0894412 | 0.2868526  | 0.5494209  | 1             | 0               |
| V\$ARNT_Q2            | 1.0734444 | 0.32862905 | 0.56750834 | 1             | 1               |
| V\$ARNT_Q1            | 1.0613682 | 0.33333334 | 0.58912313 | 1             | 1               |
| TGACGTCA_V\$ATF3_Q6   | 1.0534549 | 0.3392505  | 0.54658127 | 1             | 0               |
| V\$ZF5_Q1             | 1.0596924 | 0.34257427 | 0.5799894  | 0             | 0               |
| V\$EGR3_Q1            | 1.0538058 | 0.34455445 | 0.5576771  | 1             | 0               |
| V\$CREB_Q1            | 1.0561404 | 0.34530938 | 0.5768721  | 1             | 0               |
| V\$NFY_C              | 1.0491668 | 0.34631148 | 0.5468028  | 0             | 0               |
| V\$HIF1_Q5            | 1.03944   | 0.36489153 | 0.5621367  | 0             | 0               |
| V\$E2F1_Q3_01         | 1.0372447 | 0.37550202 | 0.5568147  | 0             | 1               |
| V\$E2A_Q2             | 1.036396  | 0.37728193 | 0.54777545 | 0             | 0               |
| CACGTG_V\$MYC_Q2      | 1.035608  | 0.3787575  | 0.5390147  | 1             | 1               |
| V\$USF_C              | 1.0552706 | 0.37984496 | 0.5661506  | 0             | 0               |

|                        |             |            |            |   |   |
|------------------------|-------------|------------|------------|---|---|
| V\$NRF1_Q6             | 1.0339642   | 0.3902439  | 0.5327982  | 1 | 0 |
| V\$CREBP1CJUN_01       | 1.0138491   | 0.41025642 | 0.5649239  | 0 | 0 |
| SCGGAAGY_V\$ELK1_02    | 1.0262437   | 0.42239687 | 0.5416531  | 1 | 0 |
| V\$USF2_Q6             | 1.0133324   | 0.42460316 | 0.55617    | 0 | 0 |
| RCGCANGCGY_V\$NRF1_C   | 1.0067084   | 0.4515504  | 0.5633411  | 1 | 0 |
| GATTGGY_V\$NFY_Q6_01   | 1.0021206   | 0.45790553 | 0.5655511  | 0 | 0 |
| V\$ATF_B               | 0.99639636  | 0.4625984  | 0.5707253  | 0 | 0 |
| V\$USF_Q6              | 0.9889722   | 0.46887967 | 0.5811703  | 0 | 0 |
| V\$SP1_Q6_01           | 0.9729574   | 0.49610895 | 0.60559666 | 1 | 0 |
| V\$AP2ALPHA_01         | 0.97311777  | 0.5067961  | 0.61517066 | 1 | 0 |
| V\$ELK1_02             | 0.95565945  | 0.5197629  | 0.6425873  | 1 | 0 |
| V\$CMYB_01             | 0.94043595  | 0.56287426 | 0.6752284  | 1 | 1 |
| V\$MYOD_Q6_01          | 0.9124171   | 0.6059406  | 0.7150062  | 1 | 0 |
| V\$CREB_Q2_01          | 0.9265719   | 0.61445785 | 0.70530576 | 1 | 0 |
| V\$AP2_Q6_01           | 0.91506135  | 0.6382536  | 0.7179062  | 0 | 0 |
| V\$CDPCR3_01           | 0.8884589   | 0.6513944  | 0.7538901  | 0 | 0 |
| V\$AP1_Q2_01           | 0.917723    | 0.6759062  | 0.7208253  | 1 | 0 |
| V\$MAZR_01             | 0.8919978   | 0.68992245 | 0.7543249  | 0 | 0 |
| V\$STAT1_03            | 0.91112626  | 0.69631237 | 0.70837325 | 0 | 0 |
| V\$SREBP1_01           | 0.8448012   | 0.70980394 | 0.8009596  | 0 | 0 |
| V\$AP4_Q6_01           | 0.8827933   | 0.73504275 | 0.75954115 | 0 | 0 |
| V\$SPZ1_01             | 0.8564285   | 0.7414141  | 0.8022178  | 0 | 0 |
| V\$RFX1_02             | 0.84646934  | 0.74375    | 0.80691963 | 0 | 0 |
| V\$GATA_Q6             | 0.8699809   | 0.75       | 0.78554076 | 0 | 0 |
| V\$MYOD_01             | 0.86296403  | 0.7824268  | 0.79490846 | 1 | 0 |
| V\$ZF5_B               | 0.8415733   | 0.808      | 0.79939735 | 0 | 0 |
| V\$HMx1_01             | 0.7851973   | 0.8312236  | 0.89054084 | 0 | 0 |
| V\$E47_01              | 0.82851565  | 0.8394004  | 0.8220884  | 0 | 0 |
| V\$USF_Q6_01           | 0.80880153  | 0.84294236 | 0.8598956  | 0 | 0 |
| V\$EGR2_01             | 0.84881496  | 0.8512397  | 0.8115969  | 0 | 0 |
| TGASTMAGC_V\$NFE2_01   | 0.788963    | 0.9080235  | 0.89355165 | 0 | 0 |
| V\$TCF11MAFG_01        | 0.75511676  | 0.9358178  | 0.93554485 | 0 | 0 |
| V\$SP1_Q6              | 0.71657956  | 0.96161616 | 0.9438392  | 1 | 0 |
| V\$NRF2_01             | 0.6481754   | 0.9682243  | 0.9800875  | 0 | 0 |
| V\$NGFIC_01            | 0.7223115   | 0.97510374 | 0.9482571  | 0 | 0 |
| V\$NMYC_01             | 0.734098    | 0.9764706  | 0.94526005 | 0 | 1 |
| V\$STAT1_02            | 0.7412521   | 0.98163265 | 0.9466872  | 0 | 0 |
| V\$CETS1P54_01         | -0.65808356 | 0.96458334 | 0.97581667 | 0 | 0 |
| V\$NFE2_01             | -0.7532867  | 0.94779116 | 0.8977309  | 0 | 0 |
| TCANNTGAY_V\$SREBP1_01 | -0.7784993  | 0.9338843  | 0.8656966  | 0 | 0 |
| V\$ZIC1_01             | -0.76823944 | 0.92367905 | 0.8783193  | 0 | 0 |
| V\$HSF_Q6              | -0.7695041  | 0.92141455 | 0.8781224  | 0 | 0 |
| V\$BACH2_01            | -0.78531915 | 0.8946322  | 0.8586541  | 0 | 0 |
| V\$MYCMAX_02           | -0.7883835  | 0.8937008  | 0.8564313  | 1 | 1 |
| V\$YY1_Q6              | -0.74272233 | 0.889336   | 0.90895194 | 0 | 0 |
| V\$GNCF_01             | -0.7604438  | 0.8813906  | 0.88891435 | 0 | 0 |
| V\$AP1_Q6              | -0.7927067  | 0.8796844  | 0.8499751  | 1 | 0 |
| V\$STAT3_02            | -0.78677183 | 0.8795181  | 0.8575539  | 1 | 1 |
| V\$CREB_Q4_01          | -0.8149615  | 0.87673956 | 0.8081498  | 1 | 0 |
| V\$SP1_Q4_01           | -0.78368306 | 0.87549406 | 0.8577333  | 1 | 0 |
| V\$PAX3_01             | -0.6838705  | 0.8742515  | 0.96309996 | 0 | 0 |
| V\$ZIC2_01             | -0.82414615 | 0.8729508  | 0.7902581  | 0 | 0 |
| V\$TAXCREB_02          | -0.711229   | 0.86821705 | 0.94265956 | 0 | 0 |
| V\$NFMUE1_Q6           | -0.7505357  | 0.8608871  | 0.8998354  | 0 | 0 |
| RYTGCNNRGNAAC_V\$MIF   | -0.7767621  | 0.84782606 | 0.866983   | 0 | 0 |
| GCCATNTTG_V\$YY1_Q6    | -0.7276368  | 0.8469602  | 0.92646956 | 0 | 0 |

|                        |             |            |            |   |   |
|------------------------|-------------|------------|------------|---|---|
| V\$CREB_Q2             | -0.8055631  | 0.8455285  | 0.8239999  | 1 | 0 |
| V\$YY1_Q2              | -0.78395176 | 0.84015596 | 0.859515   | 0 | 0 |
| V\$DR1_Q3              | -0.84131205 | 0.8377282  | 0.75831795 | 0 | 0 |
| V\$LFA1_Q6             | -0.82608515 | 0.8031189  | 0.7879632  | 0 | 0 |
| V\$PAX5_Q1             | -0.8132945  | 0.8008475  | 0.81002086 | 0 | 0 |
| V\$CACCCBINDINGFACTOR  | -0.85079205 | 0.7886497  | 0.7372147  | 0 | 0 |
| V\$P300_Q1             | -0.8666851  | 0.78571427 | 0.70210034 | 1 | 0 |
| V\$PPARA_Q2            | -0.808159   | 0.770428   | 0.82009035 | 0 | 0 |
| V\$AP2GAMMA_Q1         | -0.8388701  | 0.7647059  | 0.75989264 | 1 | 0 |
| MGGAAGTG_V\$GABP_B     | -0.83974653 | 0.7484909  | 0.7598442  | 0 | 0 |
| GGGCGGR_V\$SP1_Q6      | -0.88086694 | 0.7386831  | 0.67615765 | 1 | 0 |
| V\$AP1_Q6_Q1           | -0.8584426  | 0.7318008  | 0.7192703  | 1 | 0 |
| V\$STAT1_Q1            | -0.81535476 | 0.7235294  | 0.8093842  | 0 | 0 |
| V\$ATF3_Q6             | -0.8784407  | 0.71626985 | 0.68003476 | 1 | 0 |
| V\$NRF2_Q4             | -0.8857399  | 0.70542634 | 0.6672033  | 0 | 0 |
| V\$CACBINDINGPROTEIN_Q | -0.86256015 | 0.7053045  | 0.7107054  | 0 | 0 |
| V\$CREB_Q4             | -0.8771449  | 0.6946565  | 0.68135285 | 1 | 0 |
| V\$HIF1_Q3             | -0.8822931  | 0.69       | 0.6741497  | 0 | 0 |
| V\$MIF1_Q1             | -0.87385696 | 0.6807229  | 0.68579054 | 0 | 0 |
| V\$TAXCREB_Q1          | -0.87593406 | 0.6784314  | 0.6825289  | 0 | 0 |
| TGACCTY_V\$ERR1_Q2     | -0.9189086  | 0.66464645 | 0.59748596 | 0 | 0 |
| V\$DR3_Q4              | -0.90091157 | 0.66088635 | 0.6335606  | 0 | 0 |
| V\$AP2_Q6              | -0.9056126  | 0.6585366  | 0.62366325 | 0 | 0 |
| V\$BACH1_Q1            | -0.8963364  | 0.6554455  | 0.6436964  | 0 | 0 |
| TGAYRTCA_V\$ATF3_Q6    | -0.90744674 | 0.6501976  | 0.6206491  | 1 | 0 |
| V\$PAX5_Q2             | -0.88587654 | 0.6333333  | 0.6687338  | 0 | 0 |
| CCCNNGGGAR_V\$OLF1_Q   | -0.9128858  | 0.6208897  | 0.6090495  | 0 | 0 |
| V\$ER_Q6_Q2            | -0.9294134  | 0.6201232  | 0.57697755 | 1 | 0 |
| V\$GATA1_Q1            | -0.9191837  | 0.59325397 | 0.5984881  | 0 | 0 |
| V\$TEL2_Q6             | -0.9175626  | 0.592233   | 0.5990235  | 0 | 0 |
| V\$AP1_Q4              | -0.93890977 | 0.5869565  | 0.55996525 | 1 | 0 |
| V\$AR_Q1               | -0.92872196 | 0.58237547 | 0.57696176 | 1 | 0 |
| V\$PAX4_Q1             | -0.9441677  | 0.5703125  | 0.54945123 | 0 | 0 |
| V\$LMO2COM_Q2          | -0.93514645 | 0.55424064 | 0.5677194  | 0 | 0 |
| V\$CREBP1_Q2           | -0.9563569  | 0.54969573 | 0.5274786  | 0 | 0 |
| V\$LXR_Q3              | -0.931917   | 0.54960316 | 0.5723517  | 0 | 0 |
| V\$USF_Q2              | -0.9466053  | 0.54653466 | 0.5450718  | 0 | 0 |
| V\$HEB_Q6              | -0.95225453 | 0.54598826 | 0.533626   | 0 | 0 |
| V\$T3R_Q6              | -0.95662636 | 0.54428047 | 0.52823615 | 0 | 0 |
| V\$EGR1_Q1             | -0.95341665 | 0.54414785 | 0.53241754 | 1 | 1 |
| V\$ETS1_B              | -0.9345754  | 0.5322896  | 0.5674723  | 0 | 0 |
| V\$PPAR_DR1_Q2         | -0.98013556 | 0.51111114 | 0.48244214 | 0 | 1 |
| V\$PPARA_Q1            | -0.9664597  | 0.51012146 | 0.50889206 | 0 | 0 |
| V\$ATF_Q1              | -0.96930164 | 0.50528544 | 0.504305   | 0 | 0 |
| V\$MTF1_Q4             | -0.9630515  | 0.5019763  | 0.5150889  | 0 | 0 |
| V\$MYOGENIN_Q6         | -0.9859708  | 0.49903288 | 0.47162944 | 0 | 0 |
| V\$AREB6_Q1            | -0.97816837 | 0.49402392 | 0.48519042 | 0 | 0 |
| V\$EVI1_Q1             | -1.0067526  | 0.47758284 | 0.44446936 | 0 | 1 |
| V\$SP3_Q3              | -0.9976801  | 0.47418737 | 0.4563333  | 1 | 1 |
| V\$HNF4_DR1_Q3         | -1.0011818  | 0.46398306 | 0.45065966 | 0 | 0 |
| V\$AP1FJ_Q2            | -0.9931532  | 0.45686275 | 0.458784   | 0 | 0 |
| V\$MYB_Q3              | -0.9972672  | 0.45614034 | 0.45440552 | 1 | 0 |
| V\$ZIC3_Q1             | -0.9911041  | 0.456      | 0.46168122 | 0 | 0 |
| V\$NFKAPPAB_Q1         | -0.9970874  | 0.4526515  | 0.45342597 | 0 | 0 |
| V\$AP1_C               | -0.99755466 | 0.45224172 | 0.45523706 | 1 | 0 |
| V\$STAT_Q6             | -1.003998   | 0.44378698 | 0.44768423 | 1 | 0 |

|                      |            |            |            |   |   |
|----------------------|------------|------------|------------|---|---|
| V\$GR_Q6             | -1.0080311 | 0.44271845 | 0.44321835 | 0 | 0 |
| V\$CDPCR3HD_01       | -0.99345   | 0.43700787 | 0.45951444 | 0 | 0 |
| V\$STAT3_01          | -1.0215828 | 0.43548387 | 0.42296055 | 1 | 1 |
| V\$LXR_DR4_Q3        | -1.0066966 | 0.4354528  | 0.44323358 | 0 | 0 |
| GTGACGY_V\$E4F1_Q6   | -1.0214639 | 0.43326488 | 0.42192024 | 1 | 0 |
| V\$EGR_Q6            | -1.0117632 | 0.42718446 | 0.43685186 | 1 | 1 |
| TGANNYRGCA_V\$TCF11M | -1.0250195 | 0.42626262 | 0.4172225  | 0 | 0 |
| V\$FXR_Q3            | -1.0254874 | 0.42276424 | 0.41748938 | 1 | 0 |
| V\$ETF_Q6            | -1.0024718 | 0.42168674 | 0.44939482 | 0 | 0 |
| V\$NKC25_01          | -1.0187621 | 0.4144144  | 0.42597198 | 0 | 0 |
| V\$HNF4_01_B         | -1.0183516 | 0.41164657 | 0.42547655 | 0 | 0 |
| V\$FOXMI_01          | -1.0177242 | 0.4074074  | 0.425443   | 1 | 0 |
| V\$E4F1_Q6           | -1.028708  | 0.39256197 | 0.41509622 | 1 | 0 |
| V\$CREB_Q2           | -1.0282975 | 0.39147288 | 0.41459262 | 1 | 0 |
| V\$MAZ_Q6            | -1.0255944 | 0.38963532 | 0.41853252 | 0 | 0 |
| GGGNNTTTC_V\$NFKB_C  | -1.0492152 | 0.3856859  | 0.3806484  | 0 | 1 |
| V\$AHR_01            | -1.0413203 | 0.38011697 | 0.39328572 | 1 | 0 |
| TAAWWATAG_V\$RSRFC4_ | -1.0361317 | 0.3785851  | 0.4023801  | 0 | 0 |
| V\$ATF1_Q6           | -1.0330955 | 0.37667304 | 0.40730113 | 0 | 0 |
| V\$ISRE_01           | -1.0598165 | 0.37171718 | 0.3666939  | 0 | 0 |
| V\$ETS_Q4            | -1.0562851 | 0.36821705 | 0.3686391  | 0 | 0 |
| V\$AP4_Q6            | -1.0482143 | 0.35907337 | 0.3812817  | 0 | 0 |
| V\$IRF2_01           | -1.080858  | 0.3480769  | 0.35018438 | 0 | 0 |
| V\$PU1_Q6            | -1.069323  | 0.33976835 | 0.35996217 | 0 | 0 |
| V\$XBP1_01           | -1.0593182 | 0.33867735 | 0.36523148 | 1 | 0 |
| GGATTA_V\$PITX2_Q2   | -1.0599399 | 0.33526012 | 0.36761385 | 1 | 0 |
| RGAANNTTC_V\$HSF1_01 | -1.0673625 | 0.33397314 | 0.35990784 | 0 | 0 |
| RGAGGAARY_V\$PU1_Q6  | -1.0837219 | 0.33333334 | 0.34748003 | 0 | 0 |
| V\$MEF2_04           | -1.1007918 | 0.33271027 | 0.32202    | 1 | 0 |
| V\$NCX_01            | -1.0616399 | 0.33205375 | 0.3657537  | 0 | 0 |
| V\$CP2_02            | -1.0594462 | 0.33069307 | 0.36620188 | 0 | 0 |
| V\$AR_Q2             | -1.0737935 | 0.33007812 | 0.3593663  | 1 | 0 |
| V\$MZF1_02           | -1.0623735 | 0.3288719  | 0.36571226 | 0 | 0 |
| V\$SP1_Q2_01         | -1.066393  | 0.32876712 | 0.36065188 | 1 | 0 |
| V\$FOXJ2_01          | -1.0684365 | 0.32793522 | 0.36033887 | 0 | 0 |
| V\$TTF1_Q6           | -1.0568361 | 0.32681018 | 0.36871797 | 0 | 0 |
| V\$TCF1P_Q6          | -1.0723444 | 0.32023576 | 0.35933113 | 0 | 0 |
| V\$SREBP1_Q6         | -1.0736016 | 0.31992337 | 0.3584946  | 0 | 0 |
| V\$PAX2_01           | -1.1086859 | 0.3164794  | 0.31320843 | 0 | 0 |
| V\$AREB6_02          | -1.0661848 | 0.31609195 | 0.35974914 | 0 | 0 |
| V\$NKC61_01          | -1.0742804 | 0.31609195 | 0.3596497  | 0 | 0 |
| V\$SREBP_Q3          | -1.0703146 | 0.314      | 0.35940436 | 0 | 0 |
| V\$AP4_01            | -1.0680022 | 0.31213874 | 0.35988623 | 0 | 0 |
| V\$HEN1_01           | -1.0718443 | 0.31021196 | 0.3590205  | 0 | 0 |
| V\$LBP1_Q6           | -1.1005645 | 0.30241188 | 0.32132843 | 0 | 0 |
| V\$E47_02            | -1.0704635 | 0.3015873  | 0.36031133 | 0 | 0 |
| V\$PTF1BETA_Q6       | -1.0798522 | 0.28857717 | 0.3508649  | 0 | 0 |
| V\$TGIF_01           | -1.0826137 | 0.2851638  | 0.34825256 | 0 | 0 |
| V\$HSF1_01           | -1.0927547 | 0.28030303 | 0.33433023 | 0 | 0 |
| TTCNRGNNNTTC_V\$HSF  | -1.1199793 | 0.278      | 0.29898554 | 0 | 0 |
| V\$CDPCR1_01         | -1.0894681 | 0.2751938  | 0.33910975 | 0 | 0 |
| V\$EV11_02           | -1.1210579 | 0.26792452 | 0.29947716 | 0 | 1 |
| V\$CP2_01            | -1.1066055 | 0.26526716 | 0.3143046  | 0 | 0 |
| V\$PIT1_Q6           | -1.130703  | 0.26336634 | 0.28848803 | 1 | 0 |
| V\$CREL_01           | -1.1357502 | 0.2632613  | 0.28177488 | 0 | 0 |
| V\$IK3_01            | -1.1022478 | 0.26306307 | 0.32078624 | 0 | 0 |



|                      |            |            |            |   |   |
|----------------------|------------|------------|------------|---|---|
| V\$CDP_02            | -1.1496753 | 0.26294822 | 0.2681724  | 0 | 0 |
| TGANTCA_V\$AP1_C     | -1.0857639 | 0.26131687 | 0.34462982 | 1 | 0 |
| V\$GATA1_04          | -1.1435564 | 0.26045626 | 0.2726229  | 0 | 0 |
| V\$NERF_Q2           | -1.1193084 | 0.25585938 | 0.29787484 | 0 | 0 |
| V\$AP2REP_01         | -1.1223881 | 0.2552381  | 0.29842785 | 0 | 0 |
| CTAWWWATA_V\$RSRFC4  | -1.1199325 | 0.24903475 | 0.29799762 | 0 | 0 |
| V\$AHR_Q5            | -1.1235417 | 0.24701196 | 0.29766545 | 1 | 0 |
| V\$ELF1_Q6           | -1.1727003 | 0.24564797 | 0.2565066  | 0 | 0 |
| V\$GATA3_01          | -1.1404663 | 0.24497992 | 0.27642307 | 1 | 0 |
| V\$LEF1_Q2           | -1.108185  | 0.24236642 | 0.3129245  | 0 | 1 |
| V\$LEF1_Q6           | -1.1201583 | 0.23846154 | 0.29974502 | 0 | 1 |
| V\$AHRARNT_01        | -1.1516187 | 0.2334004  | 0.26716045 | 1 | 0 |
| V\$NFKB_Q6           | -1.1551362 | 0.23242188 | 0.26466265 | 0 | 1 |
| V\$NFKAPPAB65_01     | -1.1484681 | 0.232      | 0.2679311  | 0 | 0 |
| V\$AML_Q6            | -1.1647217 | 0.22736418 | 0.26001287 | 0 | 0 |
| V\$GRE_C             | -1.1727141 | 0.22352941 | 0.25758436 | 0 | 0 |
| CATTGTYV_V\$SOX9_B1  | -1.1748458 | 0.21576764 | 0.2577316  | 0 | 0 |
| V\$TAL1BETAITF2_01   | -1.1671094 | 0.2152381  | 0.25859955 | 0 | 0 |
| V\$LMO2COM_01        | -1.1554931 | 0.21497121 | 0.26515648 | 0 | 0 |
| V\$ELK1_01           | -1.1846389 | 0.2128514  | 0.24812247 | 1 | 0 |
| V\$FXR_IR1_Q6        | -1.1297647 | 0.21010101 | 0.2889885  | 1 | 0 |
| V\$PBX1_01           | -1.1702086 | 0.20889749 | 0.25708434 | 0 | 0 |
| V\$TFIIA_Q6          | -1.1952693 | 0.20773931 | 0.24188377 | 0 | 0 |
| V\$COUP_01           | -1.1464958 | 0.20612244 | 0.26903084 | 1 | 0 |
| V\$AR_03             | -1.1822789 | 0.20571429 | 0.25071564 | 1 | 0 |
| V\$PR_01             | -1.1609849 | 0.20527308 | 0.26239994 | 1 | 0 |
| CAGGTG_V\$E12_Q6     | -1.115386  | 0.20272905 | 0.30302057 | 0 | 0 |
| V\$RFX1_01           | -1.1564162 | 0.20079523 | 0.26488024 | 0 | 0 |
| V\$MAF_Q6            | -1.1533166 | 0.1979798  | 0.2653075  | 0 | 0 |
| V\$TBP_01            | -1.148907  | 0.19178082 | 0.2682721  | 1 | 1 |
| V\$IRF1_01           | -1.1865873 | 0.19132149 | 0.24621993 | 0 | 0 |
| V\$HSF2_01           | -1.1575403 | 0.19094488 | 0.26420173 | 0 | 0 |
| GCANCTGNY_V\$MYOD_Q1 | -1.1374685 | 0.19056603 | 0.279936   | 1 | 0 |
| YATGNWAAT_V\$OCT_C   | -1.169153  | 0.18945312 | 0.2564935  | 1 | 0 |
| V\$IRF7_01           | -1.1787834 | 0.1891892  | 0.2539383  | 0 | 0 |
| V\$SMAD3_Q6          | -1.1590621 | 0.18834952 | 0.2640056  | 0 | 1 |
| V\$HNF4_01           | -1.1620568 | 0.18796992 | 0.26282486 | 0 | 0 |
| V\$ATF4_Q2           | -1.1756884 | 0.18618043 | 0.25752512 | 0 | 0 |
| V\$GATA_C            | -1.1512696 | 0.18484288 | 0.26668248 | 0 | 0 |
| V\$AP1_Q2            | -1.1867733 | 0.18431373 | 0.24700883 | 1 | 0 |
| V\$DR4_Q2            | -1.1706631 | 0.18320611 | 0.2575336  | 0 | 0 |
| V\$LYF1_01           | -1.1585484 | 0.17843138 | 0.26374447 | 0 | 0 |
| V\$GATA1_02          | -1.169563  | 0.17794971 | 0.25700083 | 0 | 0 |
| V\$ETS2_B            | -1.2291425 | 0.17741935 | 0.21282925 | 0 | 0 |
| V\$GCM_Q2            | -1.146858  | 0.17669903 | 0.26942393 | 0 | 0 |
| V\$VDR_Q3            | -1.1818899 | 0.17636022 | 0.25022244 | 0 | 0 |
| V\$TCF11_01          | -1.1937296 | 0.17489712 | 0.2418308  | 0 | 0 |
| V\$OLF1_01           | -1.1665986 | 0.17391305 | 0.25829378 | 0 | 0 |
| V\$OCT1_Q6           | -1.1921389 | 0.1695238  | 0.24001287 | 0 | 0 |
| V\$GATA2_01          | -1.1733551 | 0.16826004 | 0.2588725  | 0 | 0 |
| V\$NFKB_Q6_01        | -1.1929854 | 0.16635513 | 0.24090514 | 0 | 1 |
| V\$ARP1_01           | -1.1730018 | 0.16403162 | 0.2582906  | 1 | 0 |
| V\$AREB6_03          | -1.15414   | 0.162      | 0.26521534 | 0 | 0 |
| V\$MZF1_01           | -1.2095643 | 0.1617357  | 0.22938405 | 0 | 0 |
| V\$MEF2_Q6_01        | -1.1929089 | 0.15851273 | 0.23993099 | 1 | 0 |
| V\$TATA_C            | -1.2183484 | 0.15625    | 0.22007357 | 0 | 0 |

|                       |            |            |            |   |   |
|-----------------------|------------|------------|------------|---|---|
| V\$EVI1_03            | -1.2206049 | 0.15612648 | 0.21912487 | 0 | 1 |
| V\$SOX9_B1            | -1.2202822 | 0.15555556 | 0.21853288 | 0 | 0 |
| GGGAGGRR_V\$MAZ_Q6    | -1.1615845 | 0.15445544 | 0.2625307  | 0 | 0 |
| V\$HOX13_01           | -1.2445556 | 0.15430862 | 0.19887723 | 0 | 0 |
| V\$COREBINDINGFACTOR_ | -1.2677729 | 0.15370019 | 0.18079373 | 0 | 0 |
| V\$E12_Q6             | -1.1938969 | 0.1521739  | 0.24271354 | 0 | 0 |
| V\$IRF1_Q6            | -1.2033564 | 0.15185185 | 0.23373264 | 0 | 0 |
| V\$PAX4_03            | -1.1983157 | 0.15105163 | 0.24064645 | 0 | 0 |
| TGATTRY_V\$GFI1_01    | -1.2035855 | 0.15073529 | 0.23452105 | 0 | 0 |
| CCAWWNAAGG_V\$SRF_Q   | -1.2783965 | 0.15042374 | 0.17580166 | 1 | 0 |
| V\$COMP1_01           | -1.2253784 | 0.14744802 | 0.21584779 | 0 | 0 |
| V\$HNF4ALPHA_Q6       | -1.2156363 | 0.14424951 | 0.22295284 | 0 | 0 |
| V\$POU3F2_02          | -1.2049384 | 0.14396887 | 0.23370007 | 0 | 0 |
| V\$HAND1E47_01        | -1.1977079 | 0.14313726 | 0.24050017 | 0 | 0 |
| V\$MEIS1BHOXA9_01     | -1.2089992 | 0.14313346 | 0.22903721 | 0 | 0 |
| V\$PEA3_Q6            | -1.2877815 | 0.1375969  | 0.17052944 | 0 | 0 |
| V\$PAX3_B             | -1.2464708 | 0.13294798 | 0.19749746 | 0 | 0 |
| V\$MMEF2_Q6           | -1.2239157 | 0.13279678 | 0.21660426 | 0 | 0 |
| V\$COUP_DR1_Q6        | -1.1716882 | 0.1322314  | 0.25688568 | 1 | 0 |
| V\$AP1_Q4_01          | -1.1933769 | 0.1321499  | 0.24134783 | 1 | 0 |
| V\$TATA_01            | -1.2542077 | 0.12770137 | 0.19378895 | 0 | 0 |
| RGTTAMWNATT_V\$HNF1_  | -1.2610205 | 0.12727273 | 0.18670022 | 0 | 0 |
| V\$MEIS1_01           | -1.2236512 | 0.12720157 | 0.21595752 | 0 | 0 |
| V\$YY1_01             | -1.2556205 | 0.12701613 | 0.19282219 | 0 | 0 |
| GGGTGRR_V\$PAX4_03    | -1.2115221 | 0.12650603 | 0.22760844 | 0 | 0 |
| V\$WHN_B              | -1.2318431 | 0.12573674 | 0.21005969 | 0 | 0 |
| V\$SMAD_Q6            | -1.2434821 | 0.1242485  | 0.19927734 | 0 | 0 |
| V\$GR_Q6_01           | -1.2324777 | 0.12244898 | 0.21019891 | 0 | 0 |
| V\$GATA1_03           | -1.2732776 | 0.11787819 | 0.17922369 | 0 | 0 |
| V\$BRN2_01            | -1.2274691 | 0.11637081 | 0.21402575 | 0 | 0 |
| V\$EVI1_04            | -1.2706206 | 0.11623246 | 0.1803081  | 0 | 1 |
| V\$AR_02              | -1.275307  | 0.11545624 | 0.17862871 | 1 | 0 |
| V\$NFKB_C             | -1.2537628 | 0.11509434 | 0.19233662 | 0 | 1 |
| V\$CREB_Q3            | -1.2538058 | 0.11332008 | 0.19323613 | 1 | 0 |
| YTAATTA_V\$LHX3_01    | -1.3032596 | 0.11262136 | 0.15749107 | 0 | 0 |
| V\$TEF1_Q6            | -1.280167  | 0.11222445 | 0.17463125 | 0 | 0 |
| V\$IRF_Q6             | -1.3210902 | 0.11175337 | 0.14911388 | 0 | 0 |
| V\$PBX1_02            | -1.2686867 | 0.11111111 | 0.18056296 | 0 | 0 |
| V\$NKX3A_01           | -1.249701  | 0.11025145 | 0.19550364 | 0 | 0 |
| V\$PAX8_01            | -1.3669938 | 0.1097561  | 0.13846718 | 0 | 0 |
| V\$ER_Q6_01           | -1.2477843 | 0.10898662 | 0.19690755 | 1 | 0 |
| CAGCTG_V\$AP4_Q5      | -1.1970166 | 0.10754717 | 0.24040915 | 0 | 0 |
| V\$NF1_Q6             | -1.2340945 | 0.10526316 | 0.20894878 | 1 | 0 |
| V\$TITF1_Q3           | -1.2818202 | 0.10379241 | 0.17377238 | 0 | 0 |
| V\$CEBPB_01           | -1.2850037 | 0.10079052 | 0.17102775 | 0 | 0 |
| RYTTCCTG_V\$ETS2_B    | -1.3179454 | 0.09881423 | 0.14874637 | 0 | 0 |
| V\$HTF_01             | -1.3714345 | 0.0987395  | 0.13927948 | 0 | 0 |
| V\$EFC_Q6             | -1.2857127 | 0.09784736 | 0.1710528  | 0 | 0 |
| V\$RREB1_01           | -1.2347211 | 0.09760957 | 0.2091179  | 0 | 0 |
| STTCRNTTT_V\$IRF_Q6   | -1.31684   | 0.09338521 | 0.14801759 | 0 | 0 |
| V\$CHX10_01           | -1.3265443 | 0.09218437 | 0.14728194 | 0 | 0 |
| V\$STAT6_02           | -1.3605107 | 0.09197652 | 0.13963602 | 0 | 0 |
| V\$AHRARNT_02         | -1.4346048 | 0.09163347 | 0.12690483 | 1 | 0 |
| V\$HMGY_Q6            | -1.2381707 | 0.09074074 | 0.20555243 | 0 | 0 |
| V\$PAX6_01            | -1.3715948 | 0.08858268 | 0.14025874 | 0 | 0 |
| V\$RORA1_01           | -1.2866348 | 0.08840864 | 0.17075655 | 0 | 0 |

|                       |            |            |            |   |   |
|-----------------------|------------|------------|------------|---|---|
| V\$PR_Q2              | -1.2904644 | 0.0877193  | 0.16843732 | 1 | 0 |
| V\$ICSBP_Q6           | -1.320491  | 0.08712121 | 0.14780827 | 0 | 0 |
| CTTTGT_V\$LEF1_Q2     | -1.2742609 | 0.08686869 | 0.17890951 | 0 | 1 |
| V\$OCT1_07            | -1.313263  | 0.08627451 | 0.15026438 | 0 | 0 |
| V\$POU1F1_Q6          | -1.2725687 | 0.08587787 | 0.17906877 | 1 | 0 |
| V\$ZID_01             | -1.2531108 | 0.08450704 | 0.1922001  | 0 | 0 |
| V\$CEBPGAMMA_Q6       | -1.3253828 | 0.08213552 | 0.14754848 | 0 | 0 |
| CGTSACG_V\$PAX3_B     | -1.3465261 | 0.08203125 | 0.14062625 | 0 | 0 |
| V\$PAX8_B             | -1.3308897 | 0.08151093 | 0.14871591 | 0 | 0 |
| V\$HEN1_02            | -1.3060795 | 0.08086785 | 0.1550766  | 0 | 0 |
| V\$SREBP1_02          | -1.3565187 | 0.0806142  | 0.13711153 | 0 | 0 |
| V\$GATA1_05           | -1.3287141 | 0.07936508 | 0.14781983 | 0 | 0 |
| V\$NKX62_Q2           | -1.3293539 | 0.0785124  | 0.14814575 | 0 | 0 |
| V\$RP58_01            | -1.3445816 | 0.07843138 | 0.14137684 | 0 | 0 |
| V\$RSRFC4_01          | -1.2914515 | 0.07839388 | 0.16838689 | 0 | 0 |
| V\$AP4_Q5             | -1.2640415 | 0.07794677 | 0.18392493 | 0 | 0 |
| TTAYRTAA_V\$E4BP4_01  | -1.3679421 | 0.07786885 | 0.1386619  | 0 | 0 |
| V\$LHX3_01            | -1.3280123 | 0.07784431 | 0.14674208 | 0 | 0 |
| V\$EV11_06            | -1.4316373 | 0.0754717  | 0.12699789 | 0 | 1 |
| V\$TFI11_Q6           | -1.3071306 | 0.0744879  | 0.15492553 | 0 | 0 |
| V\$SOX5_01            | -1.3631024 | 0.07355865 | 0.13902707 | 0 | 0 |
| V\$AR_Q6              | -1.3685783 | 0.07226563 | 0.1414523  | 1 | 0 |
| V\$POU3F2_01          | -1.3770517 | 0.07226563 | 0.14081413 | 0 | 0 |
| V\$CEBP_01            | -1.299937  | 0.06990291 | 0.15926224 | 0 | 0 |
| V\$GFI1_01            | -1.3205922 | 0.06882591 | 0.14867099 | 0 | 0 |
| V\$CEBP_Q3            | -1.3347054 | 0.06849315 | 0.14570563 | 0 | 0 |
| V\$AFP1_Q6            | -1.328713  | 0.06706114 | 0.14682105 | 0 | 0 |
| V\$HLF_01             | -1.3504758 | 0.06666667 | 0.14056702 | 0 | 0 |
| RACCACAR_V\$AML_Q6    | -1.3968316 | 0.06601942 | 0.13845879 | 0 | 0 |
| WGAATGY_V\$TEF1_Q6    | -1.3912467 | 0.06540085 | 0.14172624 | 0 | 0 |
| GATAAGR_V\$GATA_C     | -1.300407  | 0.06451613 | 0.15966175 | 0 | 0 |
| V\$CREBP1_01          | -1.3734761 | 0.06404959 | 0.14340422 | 0 | 0 |
| V\$FREAC3_01          | -1.3788447 | 0.06395349 | 0.14163727 | 0 | 0 |
| V\$MSX1_01            | -1.3426453 | 0.06358381 | 0.1413518  | 0 | 0 |
| V\$STAT5A_02          | -1.3492655 | 0.06331471 | 0.14070773 | 1 | 0 |
| V\$SR_Y_02            | -1.3880336 | 0.06324111 | 0.14223103 | 0 | 0 |
| V\$STAT5A_03          | -1.3304428 | 0.06324111 | 0.14819245 | 1 | 0 |
| V\$STAT6_01           | -1.3795605 | 0.0627451  | 0.14207312 | 0 | 0 |
| V\$OCT1_Q5_01         | -1.3097024 | 0.0626186  | 0.15321784 | 0 | 0 |
| V\$SRF_01             | -1.4880223 | 0.06160164 | 0.11081832 | 1 | 0 |
| V\$MEF2_01            | -1.3682137 | 0.06054688 | 0.13949427 | 1 | 0 |
| V\$HNF4_Q6            | -1.3389678 | 0.06024097 | 0.14314824 | 0 | 0 |
| TTCYNRGAA_V\$STAT5B_C | -1.3844122 | 0.06007752 | 0.1408179  | 1 | 0 |
| V\$SMAD4_Q6           | -1.3600397 | 0.05991736 | 0.13897131 | 0 | 0 |
| V\$HFH4_01            | -1.3726646 | 0.05942623 | 0.14179158 | 0 | 0 |
| V\$GATA6_01           | -1.3583367 | 0.05925926 | 0.13842186 | 0 | 0 |
| V\$VDR_Q6             | -1.2687173 | 0.05769231 | 0.18153626 | 0 | 0 |
| AAAYWAACM_V\$HFH4_01  | -1.3637893 | 0.05765408 | 0.13936183 | 0 | 0 |
| V\$OCT1_05            | -1.3590363 | 0.05725191 | 0.13888958 | 0 | 0 |
| V\$AMEF2_Q6           | -1.3475124 | 0.05534351 | 0.14052089 | 0 | 0 |
| V\$CDX2_Q5            | -1.4001321 | 0.05479452 | 0.13902624 | 0 | 0 |
| V\$MYB_Q5_01          | -1.3182861 | 0.05346535 | 0.14924625 | 1 | 0 |
| V\$TAL1ALPHAE47_01    | -1.3143086 | 0.05303031 | 0.15012424 | 0 | 0 |
| V\$TAL1BETAE47_01     | -1.3373998 | 0.05283757 | 0.14384757 | 0 | 0 |
| CTTTGA_V\$LEF1_Q2     | -1.317919  | 0.05242718 | 0.1478457  | 0 | 1 |
| V\$CEBPB_02           | -1.3838848 | 0.05148515 | 0.1401421  | 0 | 0 |

|                    |            |            |            |   |   |
|--------------------|------------|------------|------------|---|---|
| V\$PAX4_04         | -1.4644647 | 0.05122951 | 0.11846336 | 0 | 0 |
| V\$E2F_Q2          | -1.45475   | 0.05009634 | 0.11472054 | 0 | 1 |
| V\$STAT_01         | -1.3236645 | 0.04980843 | 0.14853545 | 1 | 0 |
| V\$STAT5A_01       | -1.3821611 | 0.04960318 | 0.14044386 | 1 | 0 |
| V\$E4BP4_01        | -1.3980734 | 0.04907975 | 0.13994133 | 0 | 0 |
| V\$NFAT_Q6         | -1.3853657 | 0.04907975 | 0.14108092 | 1 | 0 |
| V\$ATF6_01         | -1.3875185 | 0.04887984 | 0.1414435  | 0 | 0 |
| V\$CEBPDELTA_Q6    | -1.4110836 | 0.04816956 | 0.1340539  | 1 | 0 |
| V\$POU6F1_01       | -1.4165275 | 0.04708098 | 0.1309661  | 0 | 0 |
| V\$CRX_Q4          | -1.3507944 | 0.04554455 | 0.14135635 | 0 | 0 |
| V\$STAT5B_01       | -1.4624867 | 0.04536489 | 0.1191335  | 1 | 0 |
| V\$MEF2_03         | -1.3623855 | 0.04509804 | 0.13868882 | 1 | 0 |
| V\$EN1_01          | -1.3578333 | 0.04483431 | 0.13784365 | 0 | 0 |
| TATAAA_V\$TATA_01  | -1.3213758 | 0.04373758 | 0.14981982 | 0 | 0 |
| V\$OCT1_B          | -1.3410488 | 0.0433213  | 0.14204633 | 0 | 0 |
| V\$AP3_Q6          | -1.364011  | 0.04255319 | 0.14041117 | 0 | 0 |
| V\$PR_02           | -1.3963007 | 0.04227941 | 0.13760982 | 1 | 0 |
| V\$HNF6_Q6         | -1.3784325 | 0.04198473 | 0.14075638 | 0 | 0 |
| V\$OCT_Q6          | -1.3724664 | 0.04135338 | 0.14067405 | 1 | 0 |
| V\$TCF4_Q5         | -1.3731887 | 0.0412758  | 0.14236993 | 0 | 0 |
| V\$NKX25_02        | -1.3509604 | 0.04125737 | 0.14224845 | 0 | 0 |
| V\$RSRFC4_Q2       | -1.3895798 | 0.04109589 | 0.14195749 | 0 | 0 |
| V\$CEBP_Q2         | -1.4303542 | 0.04016064 | 0.12669098 | 0 | 0 |
| V\$HFH1_01         | -1.4051219 | 0.03773585 | 0.13639905 | 0 | 0 |
| V\$TST1_01         | -1.4218842 | 0.03703704 | 0.12805533 | 0 | 0 |
| V\$OCT_C           | -1.3682717 | 0.03642987 | 0.14066446 | 1 | 0 |
| V\$SRF_Q6          | -1.5527453 | 0.03636364 | 0.12333468 | 1 | 0 |
| V\$HFH8_01         | -1.4360834 | 0.03578529 | 0.12713137 | 0 | 0 |
| V\$S8_01           | -1.4226005 | 0.03441683 | 0.12872534 | 0 | 0 |
| V\$IK1_01          | -1.4214641 | 0.03420523 | 0.12686217 | 0 | 0 |
| V\$CDP_01          | -1.5072784 | 0.03307393 | 0.11149745 | 0 | 0 |
| V\$FREAC7_01       | -1.4563166 | 0.03232323 | 0.11632671 | 0 | 0 |
| V\$NF1_Q6_01       | -1.3427738 | 0.03137255 | 0.14230011 | 1 | 0 |
| V\$SRF_Q4          | -1.5630637 | 0.03073771 | 0.11977102 | 1 | 0 |
| V\$MEF2_02         | -1.3571037 | 0.03047619 | 0.13753264 | 1 | 0 |
| V\$PAX4_02         | -1.4120474 | 0.03041825 | 0.13453527 | 0 | 0 |
| V\$RORA2_01        | -1.4077128 | 0.03       | 0.13465099 | 0 | 0 |
| V\$CEBP_C          | -1.4782833 | 0.02982107 | 0.11489081 | 0 | 0 |
| CAGGTA_V\$AREB6_01 | -1.3491517 | 0.02906977 | 0.1397572  | 0 | 0 |
| V\$PITX2_Q2        | -1.4427125 | 0.02862595 | 0.12487384 | 1 | 0 |
| V\$OSF2_Q6         | -1.3973397 | 0.02851711 | 0.13935222 | 0 | 0 |
| V\$PXR_Q2          | -1.4602623 | 0.02794411 | 0.11392351 | 1 | 0 |
| V\$CEBPA_01        | -1.4328424 | 0.02788845 | 0.12728713 | 0 | 0 |
| V\$OCT1_02         | -1.4243511 | 0.02674897 | 0.12846404 | 0 | 0 |
| V\$FREAC2_01       | -1.47823   | 0.02666667 | 0.11277988 | 0 | 0 |
| V\$GR_01           | -1.4041059 | 0.02666667 | 0.13605076 | 0 | 0 |
| V\$P53_02          | -1.3864837 | 0.02626642 | 0.14113604 | 1 | 0 |
| V\$CHOP_01         | -1.4885604 | 0.026      | 0.11732177 | 0 | 0 |
| V\$CART1_01        | -1.4714621 | 0.0254902  | 0.11653609 | 0 | 0 |
| V\$HFH3_01         | -1.460493  | 0.02480916 | 0.11545901 | 0 | 0 |
| V\$CDC5_01         | -1.5125796 | 0.02348337 | 0.11478687 | 0 | 0 |
| V\$NKX22_01        | -1.4418974 | 0.02316602 | 0.12400258 | 0 | 0 |
| V\$NFAT_Q4_01      | -1.4398774 | 0.02307692 | 0.12467086 | 1 | 0 |
| V\$IK2_01          | -1.4739578 | 0.02249489 | 0.11588942 | 1 | 0 |
| V\$DBP_Q6          | -1.5059973 | 0.02156863 | 0.1104933  | 1 | 0 |
| V\$STAT4_01        | -1.5692568 | 0.0212766  | 0.12319092 | 1 | 0 |

|                      |            |            |            |   |   |
|----------------------|------------|------------|------------|---|---|
| V\$IPF1_Q4           | -1.4880842 | 0.01988072 | 0.11303709 | 0 | 0 |
| V\$SP1_01            | -1.5289329 | 0.01984127 | 0.11897605 | 1 | 0 |
| V\$PAX_Q6            | -1.498591  | 0.01972387 | 0.11094969 | 0 | 0 |
| V\$HOXA4_Q2          | -1.4701718 | 0.01934236 | 0.11585394 | 0 | 0 |
| V\$SRF_C             | -1.6495678 | 0.01875    | 0.17390291 | 1 | 0 |
| TGACAGNY_V\$MEIS1_01 | -1.4093014 | 0.01778656 | 0.13418667 | 0 | 0 |
| V\$P53_DECAMER_Q2    | -1.4293313 | 0.01778656 | 0.12599535 | 1 | 0 |
| V\$HMEF2_Q6          | -1.426629  | 0.01694915 | 0.12717342 | 0 | 0 |
| V\$OCT1_01           | -1.4622382 | 0.01657459 | 0.11742353 | 0 | 0 |
| TGGAAA_V\$NFAT_Q4_01 | -1.4549146 | 0.01609658 | 0.11638765 | 1 | 0 |
| V\$FAC1_01           | -1.5359752 | 0.01577909 | 0.1274976  | 0 | 0 |
| V\$SRF_Q5_01         | -1.6198902 | 0.01414141 | 0.156994   | 1 | 0 |
| TTGTTT_V\$FOXO4_01   | -1.4882104 | 0.01408451 | 0.11522193 | 0 | 0 |
| V\$TEF_Q6            | -1.5568876 | 0.01402806 | 0.12327384 | 1 | 0 |
| V\$CEBP_Q2_01        | -1.5154052 | 0.01364522 | 0.11466605 | 0 | 0 |
| V\$FOXO4_02          | -1.451187  | 0.01351351 | 0.11723646 | 0 | 0 |
| V\$OCT1_04           | -1.5223508 | 0.01346154 | 0.11610168 | 0 | 0 |
| TGCCAAR_V\$NF1_Q6    | -1.5009998 | 0.012      | 0.11302084 | 1 | 0 |
| V\$OCT1_06           | -1.4681382 | 0.01197605 | 0.11632563 | 0 | 0 |
| V\$FOXO1_02          | -1.5469917 | 0.01171875 | 0.12093191 | 1 | 0 |
| V\$MYB_Q6            | -1.4850972 | 0.01169591 | 0.11185444 | 1 | 0 |
| V\$AML1_01           | -1.5812889 | 0.01165049 | 0.13529222 | 0 | 0 |
| V\$AML1_Q6           | -1.5812889 | 0.01165049 | 0.12683645 | 0 | 0 |
| V\$HNF3B_01          | -1.5006096 | 0.01165049 | 0.11107901 | 0 | 0 |
| V\$FOXO4_01          | -1.5281856 | 0.01158301 | 0.11607751 | 0 | 0 |
| YTATTTNR_V\$MEF2_02  | -1.480681  | 0.01158301 | 0.11407978 | 1 | 0 |
| V\$STAT5A_04         | -1.5346708 | 0.01149425 | 0.12444168 | 1 | 0 |
| V\$HNF1_01           | -1.4612346 | 0.01012146 | 0.11640648 | 0 | 0 |
| V\$FOXO3_01          | -1.5276172 | 0.01010101 | 0.11334333 | 0 | 0 |
| V\$FREAC4_01         | -1.595093  | 0.01002004 | 0.14268534 | 0 | 0 |
| RTAAACA_V\$FREAC2_01 | -1.5163678 | 0.00986193 | 0.11701166 | 0 | 0 |
| V\$HNF1_C            | -1.5743504 | 0.00984252 | 0.12869148 | 0 | 0 |
| V\$EVI1_05           | -1.5503354 | 0.00963391 | 0.12087664 | 0 | 1 |
| V\$MYOGNF1_01        | -1.6109638 | 0.00826446 | 0.14020717 | 1 | 0 |
| TAATTA_V\$CHX10_01   | -1.5108709 | 0.00787402 | 0.11353545 | 0 | 0 |
| V\$CIZ_01            | -1.6217434 | 0.00784314 | 0.20541638 | 0 | 0 |
| V\$ER_Q6             | -1.5290958 | 0.00776699 | 0.12281801 | 1 | 0 |
| V\$GATA4_Q3          | -1.5088729 | 0.00772201 | 0.112824   | 0 | 0 |
| V\$HNF3_Q6           | -1.4962187 | 0.00594059 | 0.11120772 | 1 | 0 |
| V\$MEIS1AHOXA9_01    | -1.5420316 | 0.00585938 | 0.12349407 | 0 | 0 |
| V\$HP1SITEFACTOR_Q6  | -1.5670202 | 0.00574713 | 0.11996889 | 0 | 0 |
| TGTTTGY_V\$HNF3_Q6   | -1.5303377 | 0.00399202 | 0.12506737 | 1 | 0 |
| V\$PAX2_02           | -1.6101288 | 0.00396825 | 0.12901054 | 0 | 0 |
| V\$HNF1_Q6           | -1.5186156 | 0.00391389 | 0.11803719 | 0 | 0 |
| V\$FOX_Q2            | -1.5710179 | 0.00379507 | 0.12775126 | 0 | 0 |
| V\$FOXO3_01          | -1.6204904 | 0.00376648 | 0.17800963 | 1 | 1 |
| V\$OCT1_03           | -1.7548891 | 0.00194932 | 0.0977907  | 0 | 0 |
| V\$FOXJ2_02          | -1.5922582 | 0.00194553 | 0.13734926 | 0 | 0 |
| V\$SRY_01            | -1.6816318 | 0.00194553 | 0.14248738 | 0 | 0 |
| V\$FOXO1_01          | -1.5832654 | 0.0018797  | 0.1416504  | 1 | 0 |
| TTGCWCAAY_V\$CEBPB_0 | -1.8247044 | 0          | 0.06163377 | 0 | 0 |
| V\$AREB6_04          | -1.6164918 | 0          | 0.14603798 | 0 | 0 |
| V\$HNF3ALPHA_Q6      | -1.6949065 | 0          | 0.15418825 | 1 | 0 |

Supplementary Table 12 : Identification of the 100 luminal breast tumors in GEO public database.

| <b>Title</b> | <b>Molecular Subtype</b> | <b>Public database</b>  | <b>Data set</b> | <b>Sample</b> |
|--------------|--------------------------|-------------------------|-----------------|---------------|
| OXFT_1770    | Luminal A                | Gene Expression Omnibus | GSE6532         | GSM65348      |
| BC151        | Luminal A                | Gene Expression Omnibus | GSE21653        | GSM540258     |
| BC155        | Luminal A                | Gene Expression Omnibus | GSE21653        | GSM540262     |
| BC172        | Luminal A                | Gene Expression Omnibus | GSE21653        | GSM540279     |
| BC173        | Luminal A                | Gene Expression Omnibus | GSE21653        | GSM540280     |
| BC179        | Luminal A                | Gene Expression Omnibus | GSE21653        | GSM540286     |
| BC180        | Luminal A                | Gene Expression Omnibus | GSE21653        | GSM540287     |
| BC189        | Luminal A                | Gene Expression Omnibus | GSE21653        | GSM540296     |
| BC198        | Luminal A                | Gene Expression Omnibus | GSE21653        | GSM540305     |
| BC206        | Luminal A                | Gene Expression Omnibus | GSE21653        | GSM540313     |
| BC7          | Luminal A                | Gene Expression Omnibus | GSE21653        | GSM540114     |
| BC15         | Luminal A                | Gene Expression Omnibus | GSE21653        | GSM540122     |
| BC19         | Luminal A                | Gene Expression Omnibus | GSE21653        | GSM540126     |
| BC26         | Luminal A                | Gene Expression Omnibus | GSE21653        | GSM540133     |
| BC27         | Luminal A                | Gene Expression Omnibus | GSE21653        | GSM540134     |
| BC28         | Luminal A                | Gene Expression Omnibus | GSE21653        | GSM540135     |
| BC29         | Luminal A                | Gene Expression Omnibus | GSE21653        | GSM540136     |
| BC37         | Luminal A                | Gene Expression Omnibus | GSE21653        | GSM540144     |
| BC38         | Luminal A                | Gene Expression Omnibus | GSE21653        | GSM540145     |
| BC43         | Luminal A                | Gene Expression Omnibus | GSE21653        | GSM540150     |
| BC46         | Luminal A                | Gene Expression Omnibus | GSE21653        | GSM540153     |
| BC53         | Luminal A                | Gene Expression Omnibus | GSE21653        | GSM540160     |
| BC56         | Luminal A                | Gene Expression Omnibus | GSE21653        | GSM540163     |
| BC62         | Luminal A                | Gene Expression Omnibus | GSE21653        | GSM540169     |
| BC63         | Luminal A                | Gene Expression Omnibus | GSE21653        | GSM540170     |
| BC64         | Luminal A                | Gene Expression Omnibus | GSE21653        | GSM540171     |
| BC66         | Luminal A                | Gene Expression Omnibus | GSE21653        | GSM540173     |
| BC68         | Luminal A                | Gene Expression Omnibus | GSE21653        | GSM540175     |
| BC72         | Luminal A                | Gene Expression Omnibus | GSE21653        | GSM540179     |
| BC78         | Luminal A                | Gene Expression Omnibus | GSE21653        | GSM540185     |
| BC81         | Luminal A                | Gene Expression Omnibus | GSE21653        | GSM540188     |
| BC84         | Luminal A                | Gene Expression Omnibus | GSE21653        | GSM540191     |
| BC85         | Luminal A                | Gene Expression Omnibus | GSE21653        | GSM540192     |
| BC86         | Luminal A                | Gene Expression Omnibus | GSE21653        | GSM540193     |
| BC87         | Luminal A                | Gene Expression Omnibus | GSE21653        | GSM540194     |
| BC93         | Luminal A                | Gene Expression Omnibus | GSE21653        | GSM540200     |
| BC95         | Luminal A                | Gene Expression Omnibus | GSE21653        | GSM540202     |
| BC96         | Luminal A                | Gene Expression Omnibus | GSE21653        | GSM540203     |
| BC97         | Luminal A                | Gene Expression Omnibus | GSE21653        | GSM540204     |
| BC98         | Luminal A                | Gene Expression Omnibus | GSE21653        | GSM540205     |
| BC100        | Luminal A                | Gene Expression Omnibus | GSE21653        | GSM540207     |
| BC103        | Luminal A                | Gene Expression Omnibus | GSE21653        | GSM540210     |
| BC104        | Luminal A                | Gene Expression Omnibus | GSE21653        | GSM540211     |
| BC105        | Luminal A                | Gene Expression Omnibus | GSE21653        | GSM540212     |
| BC113        | Luminal A                | Gene Expression Omnibus | GSE21653        | GSM540220     |
| BC115        | Luminal A                | Gene Expression Omnibus | GSE21653        | GSM540222     |
| BC116        | Luminal A                | Gene Expression Omnibus | GSE21653        | GSM540223     |
| BC118        | Luminal A                | Gene Expression Omnibus | GSE21653        | GSM540225     |
| BC121        | Luminal A                | Gene Expression Omnibus | GSE21653        | GSM540228     |
| BC122        | Luminal A                | Gene Expression Omnibus | GSE21653        | GSM540229     |
| BC123        | Luminal A                | Gene Expression Omnibus | GSE21653        | GSM540230     |
| BC125        | Luminal A                | Gene Expression Omnibus | GSE21653        | GSM540232     |
| BC126        | Luminal A                | Gene Expression Omnibus | GSE21653        | GSM540233     |

|            |           |                         |          |           |
|------------|-----------|-------------------------|----------|-----------|
| BC127      | Luminal A | Gene Expression Omnibus | GSE21653 | GSM540234 |
| BC132      | Luminal A | Gene Expression Omnibus | GSE21653 | GSM540239 |
| BC133      | Luminal A | Gene Expression Omnibus | GSE21653 | GSM540240 |
| BC136      | Luminal A | Gene Expression Omnibus | GSE21653 | GSM540243 |
| BC134      | Luminal A | Gene Expression Omnibus | GSE21653 | GSM540241 |
| BC140      | Luminal A | Gene Expression Omnibus | GSE21653 | GSM540247 |
| OXFT_1902  | Luminal B | Gene Expression Omnibus | GSE6532  | GSM65354  |
| OXFT_209   | Luminal B | Gene Expression Omnibus | GSE6532  | GSM65344  |
| OXFT_596   | Luminal B | Gene Expression Omnibus | GSE6532  | GSM65371  |
| BC162      | Luminal B | Gene Expression Omnibus | GSE21653 | GSM540269 |
| BC170      | Luminal B | Gene Expression Omnibus | GSE21653 | GSM540277 |
| BC171      | Luminal B | Gene Expression Omnibus | GSE21653 | GSM540278 |
| BC177      | Luminal B | Gene Expression Omnibus | GSE21653 | GSM540284 |
| BC11       | Luminal B | Gene Expression Omnibus | GSE21653 | GSM540118 |
| BC188      | Luminal B | Gene Expression Omnibus | GSE21653 | GSM540295 |
| BC191      | Luminal B | Gene Expression Omnibus | GSE21653 | GSM540298 |
| BC192      | Luminal B | Gene Expression Omnibus | GSE21653 | GSM540299 |
| BC196      | Luminal B | Gene Expression Omnibus | GSE21653 | GSM540303 |
| BC199      | Luminal B | Gene Expression Omnibus | GSE21653 | GSM540306 |
| BC204      | Luminal B | Gene Expression Omnibus | GSE21653 | GSM540311 |
| BC1        | Luminal B | Gene Expression Omnibus | GSE21653 | GSM540108 |
| GUYT_50111 | Luminal B | Gene Expression Omnibus | GSE6532  | GSM151266 |
| GUYT_50115 | Luminal B | Gene Expression Omnibus | GSE6532  | GSM151268 |
| GUYT_50119 | Luminal B | Gene Expression Omnibus | GSE6532  | GSM151272 |
| GUYT_50132 | Luminal B | Gene Expression Omnibus | GSE6532  | GSM151281 |
| GUYT_50136 | Luminal B | Gene Expression Omnibus | GSE6532  | GSM151284 |
| GUYT_50148 | Luminal B | Gene Expression Omnibus | GSE6532  | GSM151289 |
| GUYT_50160 | Luminal B | Gene Expression Omnibus | GSE6532  | GSM151299 |
| GUYT_50200 | Luminal B | Gene Expression Omnibus | GSE6532  | GSM151320 |
| GUYT_50219 | Luminal B | Gene Expression Omnibus | GSE6532  | GSM151326 |
| BC16       | Luminal B | Gene Expression Omnibus | GSE21653 | GSM540123 |
| BC21       | Luminal B | Gene Expression Omnibus | GSE21653 | GSM540128 |
| BC24       | Luminal B | Gene Expression Omnibus | GSE21653 | GSM540131 |
| BC32       | Luminal B | Gene Expression Omnibus | GSE21653 | GSM540139 |
| BC35       | Luminal B | Gene Expression Omnibus | GSE21653 | GSM540142 |
| BC41       | Luminal B | Gene Expression Omnibus | GSE21653 | GSM540148 |
| BC45       | Luminal B | Gene Expression Omnibus | GSE21653 | GSM540152 |
| BC58       | Luminal B | Gene Expression Omnibus | GSE21653 | GSM540165 |
| BC59       | Luminal B | Gene Expression Omnibus | GSE21653 | GSM540166 |
| BC61       | Luminal B | Gene Expression Omnibus | GSE21653 | GSM540168 |
| BC70       | Luminal B | Gene Expression Omnibus | GSE21653 | GSM540177 |
| BC75       | Luminal B | Gene Expression Omnibus | GSE21653 | GSM540182 |
| BC89       | Luminal B | Gene Expression Omnibus | GSE21653 | GSM540196 |
| BC94       | Luminal B | Gene Expression Omnibus | GSE21653 | GSM540201 |
| BC114      | Luminal B | Gene Expression Omnibus | GSE21653 | GSM540221 |
| BC124      | Luminal B | Gene Expression Omnibus | GSE21653 | GSM540231 |
| BC146      | Luminal B | Gene Expression Omnibus | GSE21653 | GSM540253 |

---
